# Supplementary material for: Rapid sex-specific adaptation to high temperature in Drosophila
Source: eLife. 2020 Feb 21;9:e53237. doi: 10.7554/eLife.53237 (PMC7034977; doi:10.7554/eLife.53237)
Supplement: Supplementary file 1. — The file records the design matrix and results of likelihood ratio test for three different contrasts between (1) evolved and ancestral samples in males, (2) evolved and ancestral samples in females and (3) male and female samples. [file elife-53237-supp1.xlsx]

## Sheet: design matrix
Supplementary File 1. Likelihood ratio test for different contrasts
group	female evolution	male evolution	sex-bias
ancestral female	-1	0	0.5
ancestral male	0	-1	-0.5
evolved female	1	0	0.5
evolved male	0	1	-0.5

## Sheet: female_evolution
Gene_ID	logFC	logCPM	LR	PValue	padj
dsim_PG00010	-0.20808	0.332881	0.344355	0.557326	0.67903
dsim_PG00026	0.127288	4.36951	2.97604	0.0845056	0.158032
dsim_PG00027	0.0294861	4.26153	0.170707	0.679485	0.779368
dsim_PG00028	-0.389819	4.66017	19.9204	8.07341e-06	4.06984e-05
dsim_PG00029	0.166854	8.13713	6.05665	0.013854	0.0335255
dsim_PG00034	-1.23732	7.87321	42.9917	5.49721e-11	7.04432e-10
dsim_PG00041	0.176612	4.64396	1.06415	0.30227	0.436156
dsim_PG00042	0.00432365	3.97905	0.00128366	0.971419	0.982011
dsim_PG00043	-0.0954474	0.457172	0.105152	0.745732	0.829944
dsim_PG00044	-0.0996417	2.39738	0.650688	0.419867	0.555029
dsim_PG00056	-1.18534	2.39141	49.6726	1.81664e-12	3.0461e-11
dsim_PG00062	0.833874	3.35399	29.6723	5.11619e-08	3.89564e-07
dsim_PG00064	0.509098	0.619646	7.11677	0.00763661	0.0199612
dsim_PG00074	0.0684937	2.12415	0.116766	0.732569	0.819968
dsim_PG00076	-0.000464131	2.35224	1.24174e-05	0.997188	0.998244
dsim_PG00099	1.20194	-0.303796	9.04822	0.00262951	0.00771557
dsim_PG00100	-0.00502927	4.72674	0.00355333	0.952466	0.969588
dsim_PG00108	-0.40312	3.168	5.03619	0.024823	0.0555623
dsim_PG00121	0.0261987	6.35289	0.042731	0.836233	0.892781
dsim_PG00127	0.0242996	3.61312	0.082967	0.773316	0.849588
dsim_PG00129	-0.565667	3.58614	26.0741	3.28559e-07	2.16679e-06
dsim_PG00140	-0.0595981	1.78088	0.115005	0.734517	0.821571
dsim_PG00141	0.354108	3.5368	6.43033	0.0112188	0.0278759
dsim_PG00147	-0.644785	1.27532	9.15668	0.00247812	0.00732459
dsim_PG00150	-0.323199	2.75941	4.56344	0.0326615	0.0707304
dsim_PG00171	-0.106868	4.14089	0.925397	0.336062	0.471884
dsim_PG00172	-0.0835557	0.371823	0.105261	0.745605	0.829942
dsim_PG00174	-0.234193	3.65296	3.37599	0.0661528	0.128991
dsim_PG00175	-0.140867	4.26072	2.48835	0.114692	0.202964
dsim_PG00176	0.281168	0.516963	1.45807	0.227237	0.34846
dsim_PG00177	-0.135261	6.90727	0.261917	0.608806	0.72176
dsim_PG00182	-0.227988	3.57887	7.68479	0.00556881	0.0151595
dsim_PG00183	-0.333029	5.27402	10.6585	0.00109566	0.00353277
dsim_PG00184	-0.22484	2.22484	1.56898	0.210356	0.328056
dsim_PG00187	-0.546461	2.86955	13.7503	0.000208784	0.000789789
dsim_PG00188	1.1564	3.70017	16.4612	4.96558e-05	0.000212486
dsim_PG00190	-0.205604	4.7007	4.48207	0.0342523	0.0735856
dsim_PG00191	-0.10143	2.8625	0.724978	0.394516	0.529108
dsim_PG00196	0.0771234	2.94101	0.499487	0.479726	0.610305
dsim_PG00198	0.347835	1.31622	1.88078	0.170245	0.278356
dsim_PG00200	-0.0954218	0.200208	0.0957689	0.756967	0.837464
dsim_PG00201	-0.96228	1.46732	28.9178	7.55173e-08	5.62337e-07
dsim_PG00202	-1.47929	1.15421	53.1161	3.14406e-13	5.98257e-12
dsim_PG00207	0.160993	4.58045	0.662762	0.415586	0.550525
dsim_PG00226	0.0709522	1.21594	0.0824766	0.773969	0.84991
dsim_PG00228	-0.34772	1.23669	1.92148	0.165694	0.272415
dsim_PG00237	0.164595	2.68837	2.4641	0.116475	0.205619
dsim_PG00238	-0.684504	5.82856	36.438	1.576e-09	1.5755e-08
dsim_PG00243	-0.491909	3.13035	10.6996	0.00107158	0.00346578
dsim_PG00245	-0.0469072	1.32712	0.0540919	0.81609	0.87882
dsim_PG00247	0.154393	4.55602	2.50542	0.113455	0.201077
dsim_PG00249	-0.0925922	3.47254	0.125516	0.723127	0.813443
dsim_PG00250	0.109893	3.17273	0.285762	0.592949	0.70811
dsim_PG00255	-0.448566	5.22016	12.8221	0.000342548	0.00123833
dsim_PG00257	-0.232383	4.38441	2.12719	0.144706	0.244415
dsim_PG00258	-0.43759	2.11581	12.894	0.000329646	0.00119703
dsim_PG00261	-0.976586	4.18541	11.5705	0.000670054	0.0022704
dsim_PG00265	-1.52758	0.920532	62.9704	2.09842e-15	5.9238e-14
dsim_PG00272	0.00640018	4.0875	0.000684131	0.979133	0.986187
dsim_PG00275	-0.022047	6.85833	0.0597718	0.806857	0.872501
dsim_PG00276	-0.225596	1.95447	2.58316	0.108006	0.193303
dsim_PG00278	-0.262108	4.23283	2.8523	0.0912436	0.168163
FBgn0000008	0.0870437	5.21701	1.6851	0.194248	0.308016
FBgn0000014	-0.0702632	4.44802	0.397866	0.528194	0.654841
FBgn0000015	-0.298361	4.34339	9.87914	0.00167163	0.00518994
FBgn0000017	0.0899089	7.24849	2.5062	0.113399	0.201014
FBgn0000018	-0.134233	3.36041	2.05322	0.151884	0.254603
FBgn0000024	-0.11843	6.48124	1.45539	0.227665	0.348838
FBgn0000032	-0.0447018	5.67384	0.866842	0.351831	0.487309
FBgn0000037	0.00320122	4.24891	0.00124437	0.97186	0.982195
FBgn0000038	-0.123761	6.86975	1.29578	0.254985	0.38143
FBgn0000039	0.565474	3.41219	18.254	1.93324e-05	8.97088e-05
FBgn0000044	-0.293367	9.55026	10.2477	0.00136858	0.00434318
FBgn0000045	-0.56803	9.63543	16.3421	5.28763e-05	0.000225046
FBgn0000046	-0.0340683	8.13578	0.30227	0.582463	0.699473
FBgn0000047	-0.316377	7.9598	2.16241	0.141423	0.240114
FBgn0000052	0.174945	7.16185	2.60492	0.106533	0.191136
FBgn0000053	-0.0797026	7.10426	0.453299	0.500772	0.629259
FBgn0000054	0.057522	5.41032	1.34338	0.246438	0.371346
FBgn0000055	-0.0886843	11.2557	0.414318	0.519786	0.647558
FBgn0000056	-0.0729305	0.390826	0.050723	0.82181	0.883366
FBgn0000057	0.167687	5.68811	13.3886	0.000253163	0.000944069
FBgn0000061	0.50827	-0.366735	2.4858	0.114878	0.203255
FBgn0000063	0.11079	5.03133	0.7949	0.372622	0.508425
FBgn0000064	-0.0746414	12.0129	1.97289	0.160141	0.265647
FBgn0000071	-0.340527	0.275069	0.990751	0.319559	0.455405
FBgn0000075	1.32616	1.7725	28.3169	1.02993e-07	7.4636e-07
FBgn0000077	0.192318	3.87446	5.57493	0.0182194	0.0425013
FBgn0000083	-0.0583448	7.71765	1.38983	0.238435	0.361532
FBgn0000092	0.0825106	3.98578	0.189014	0.663739	0.766255
FBgn0000097	-0.0403012	6.78805	0.597981	0.43935	0.572722
FBgn0000099	0.489201	5.3573	31.3699	2.13267e-08	1.71357e-07
FBgn0000100	0.218715	10.2102	14.0587	0.000177195	0.000678435
FBgn0000108	0.00907125	7.6282	0.0134938	0.907524	0.943023
FBgn0000109	0.110931	4.09905	1.50713	0.219578	0.339195
FBgn0000114	-0.313302	9.74914	47.8178	4.67715e-12	7.33529e-11
FBgn0000115	0.322632	5.2545	33.5506	6.94326e-09	6.12522e-08
FBgn0000116	0.0586572	10.8077	0.808215	0.368648	0.503831
FBgn0000117	0.243088	8.63788	33.8542	5.93998e-09	5.31954e-08
FBgn0000119	-0.147977	5.52085	8.28496	0.00399748	0.0112945
FBgn0000120	0.314886	9.88719	27.7311	1.394e-07	9.87496e-07
FBgn0000121	0.397102	10.4346	38.4327	5.66748e-10	6.12541e-09
FBgn0000139	0.135529	5.24327	5.65891	0.0173669	0.0406935
FBgn0000140	0.0233599	7.62825	0.107265	0.743279	0.828035
FBgn0000146	-0.419261	5.45612	55.8329	7.8899e-14	1.65811e-12
FBgn0000147	0.696729	5.69273	96.4029	9.37282e-23	9.84875e-21
FBgn0000150	0.532452	9.43295	56.2614	6.34498e-14	1.35145e-12
FBgn0000152	0.0534016	4.68674	0.745254	0.387983	0.523492
FBgn0000153	0.382154	6.73676	24.0209	9.52964e-07	5.76964e-06
FBgn0000157	0.0417811	3.55	0.161076	0.688168	0.785706
FBgn0000163	-0.0650902	7.12791	1.48269	0.223355	0.343714
FBgn0000173	-0.305411	6.74085	52.5594	4.17431e-13	7.78629e-12
FBgn0000179	0.351255	1.93648	4.31665	0.0377412	0.0800445
FBgn0000180	-0.126299	2.19982	0.769767	0.380289	0.515908
FBgn0000181	0.471059	8.62253	92.6346	6.28976e-22	5.8316e-20
FBgn0000182	0.0327572	9.9516	0.350056	0.554081	0.676646
FBgn0000183	-0.00607437	7.81711	0.0223881	0.881059	0.924039
FBgn0000206	0.421658	4.94385	25.4852	4.45798e-07	2.87383e-06
FBgn0000210	-0.295046	4.07984	5.21473	0.0223963	0.0508529
FBgn0000212	0.0729081	7.50066	1.07395	0.300054	0.433523
FBgn0000221	0.497785	3.11659	30.8661	2.76462e-08	2.18239e-07
FBgn0000228	-0.0888415	6.22439	3.64227	0.0563299	0.112577
FBgn0000229	-0.319653	5.731	35.4587	2.60514e-09	2.5114e-08
FBgn0000233	0.127041	0.321915	0.241419	0.623183	0.734385
FBgn0000239	-0.000623612	7.7966	0.000191213	0.988967	0.99243
FBgn0000241	0.210457	3.20493	2.82145	0.0930126	0.1709
FBgn0000242	0.0421152	5.47738	0.512974	0.473854	0.604932
FBgn0000244	0.17629	6.67859	7.1959	0.00730702	0.0191951
FBgn0000246	-0.146839	3.45915	0.678765	0.410012	0.54551
FBgn0000247	-0.0533544	7.10525	0.993518	0.318884	0.454649
FBgn0000250	0.0196499	8.36773	0.206742	0.649333	0.75365
FBgn0000251	0.0563176	7.25321	1.35213	0.244906	0.36939
FBgn0000253	-0.133799	10.0489	4.31135	0.037859	0.0802584
FBgn0000256	0.029622	7.80142	0.315497	0.574327	0.69234
FBgn0000257	0.428559	4.98628	33.318	7.82565e-09	6.82094e-08
FBgn0000259	-0.0728021	7.62809	1.74604	0.186375	0.298801
FBgn0000261	-0.0237358	9.64688	0.131127	0.717266	0.808685
FBgn0000273	0.0123893	5.46364	0.0215052	0.883411	0.925736
FBgn0000283	0.0777533	7.33228	2.10985	0.146353	0.246626
FBgn0000286	-0.0359956	6.92719	0.521298	0.470289	0.602172
FBgn0000287	0.328511	4.72417	7.49156	0.00619888	0.0166495
FBgn0000289	0.0376749	7.64081	0.905424	0.341332	0.477401
FBgn0000299	0.187507	8.53194	4.15096	0.0416109	0.0869645
FBgn0000303	0.00776157	4.99415	0.00909549	0.924021	0.954092
FBgn0000307	0.0642998	7.24114	0.729511	0.393042	0.527982
FBgn0000308	-0.198717	9.22308	13.5984	0.000226381	0.000850908
FBgn0000313	0.0312076	8.50636	0.226522	0.634115	0.742539
FBgn0000316	-0.415812	5.06397	79.6353	4.50313e-19	2.44747e-17
FBgn0000317	-0.240112	6.112	15.7287	7.31063e-05	0.000303098
FBgn0000318	0.127339	6.61752	6.03202	0.0140486	0.0339097
FBgn0000319	-0.179757	9.36991	24.5093	7.39539e-07	4.56516e-06
FBgn0000320	0.185946	4.4564	7.10085	0.00770476	0.0201059
FBgn0000326	-0.11202	5.20283	1.47142	0.225122	0.34595
FBgn0000330	0.203521	4.97657	15.4235	8.59122e-05	0.000352177
FBgn0000337	-0.218467	0.753733	0.641388	0.423209	0.558704
FBgn0000339	-0.0708971	5.89184	1.94562	0.16306	0.269189
FBgn0000346	0.04785	6.85661	0.229089	0.6322	0.741131
FBgn0000352	-0.0431771	6.15461	0.675171	0.411255	0.546548
FBgn0000370	-0.2444	10.0835	24.4273	7.7166e-07	4.75103e-06
FBgn0000376	-0.146656	6.62386	7.14121	0.00753322	0.0197236
FBgn0000377	0.253413	5.46353	26.9218	2.11855e-07	1.45393e-06
FBgn0000382	0.0146085	7.34734	0.0881684	0.766519	0.84423
FBgn0000384	-0.0241911	4.03477	0.139199	0.709079	0.80295
FBgn0000392	0.00249827	9.06923	0.00251704	0.959987	0.975456
FBgn0000394	-0.25896	5.40302	17.8408	2.40171e-05	0.000109408
FBgn0000395	0.208925	4.33332	2.01447	0.155806	0.259854
FBgn0000404	0.0479769	9.5098	0.890679	0.345293	0.481061
FBgn0000406	0.361312	9.01229	11.7963	0.000593499	0.00203507
FBgn0000409	0.341314	9.89406	20.6899	5.39988e-06	2.81266e-05
FBgn0000411	-0.125706	2.67001	0.936114	0.333279	0.469161
FBgn0000412	-0.307625	9.03737	57.3586	3.63175e-14	8.06232e-13
FBgn0000413	0.39506	6.77044	48.4706	3.35285e-12	5.38206e-11
FBgn0000414	-0.00973188	7.28824	0.0272656	0.868847	0.916734
FBgn0000416	-0.272756	10.0027	33.9483	5.65953e-09	5.13156e-08
FBgn0000422	-0.0965305	6.08064	1.15566	0.282368	0.41373
FBgn0000426	0.215182	4.5381	8.90506	0.00284382	0.00827507
FBgn0000439	0.219132	1.65855	1.13105	0.287552	0.419553
FBgn0000442	-0.0332037	4.01349	0.139779	0.708501	0.802431
FBgn0000447	0.237724	6.57162	19.0398	1.28022e-05	6.17708e-05
FBgn0000448	-0.531978	4.68043	22.4282	2.18143e-06	1.22287e-05
FBgn0000451	1.13277	3.24172	15.2075	9.63206e-05	0.000390778
FBgn0000454	0.530405	7.93971	110.974	5.99524e-26	9.60966e-24
FBgn0000455	-0.0278665	5.76877	0.267364	0.605106	0.719266
FBgn0000459	0.275447	2.29076	3.19634	0.0738032	0.141459
FBgn0000463	-0.0319659	5.75281	0.0589252	0.808203	0.873506
FBgn0000464	-0.0250603	6.88697	0.148808	0.699677	0.795255
FBgn0000473	-0.999062	7.76188	43.1181	5.15342e-11	6.64883e-10
FBgn0000477	0.347651	5.05095	11.5871	0.000664105	0.00225267
FBgn0000479	-0.140966	8.09872	4.85994	0.0274873	0.060778
FBgn0000482	-0.0398223	4.98117	0.625393	0.42905	0.563908
FBgn0000489	-0.274433	6.65164	19.5769	9.66282e-06	4.7944e-05
FBgn0000490	-0.1392	4.67226	2.42714	0.11925	0.209541
FBgn0000492	-0.0876246	3.24376	0.400477	0.526843	0.653938
FBgn0000497	-0.497292	3.57754	12.8622	0.000335288	0.00121487
FBgn0000499	0.342188	6.53599	47.0092	7.06535e-12	1.06566e-10
FBgn0000500	0.790066	2.31904	18.5696	1.63812e-05	7.72268e-05
FBgn0000504	-0.0990524	6.42844	1.33701	0.247563	0.372803
FBgn0000524	0.243229	5.5611	12.4617	0.000415392	0.00147019
FBgn0000527	-0.136639	5.12591	2.88896	0.0891886	0.164995
FBgn0000533	0.16425	4.85746	6.29733	0.012092	0.02971
FBgn0000535	0.174419	3.12237	1.11406	0.291202	0.423605
FBgn0000536	-0.187365	7.11626	12.776	0.000351098	0.00126634
FBgn0000541	0.0175468	8.97226	0.0451526	0.831724	0.889775
FBgn0000542	-0.226979	3.74147	4.6881	0.0303722	0.0664884
FBgn0000543	0.469851	5.29204	65.8626	4.83469e-16	1.50897e-14
FBgn0000546	0.00738519	6.11476	0.0125237	0.910895	0.945384
FBgn0000556	-0.0964513	12.3884	4.79123	0.028605	0.063043
FBgn0000557	0.158463	8.47362	6.41159	0.0113378	0.0281422
FBgn0000559	-0.106631	12.0803	9.44179	0.00212097	0.00641445
FBgn0000562	-0.0207797	7.70202	0.213979	0.643666	0.749926
FBgn0000565	-0.0631454	6.37575	0.121025	0.727925	0.816351
FBgn0000566	0.257306	6.22422	9.20104	0.00241878	0.00717026
FBgn0000567	-0.516256	4.76527	27.4889	1.58e-07	1.10846e-06
FBgn0000568	-0.290146	7.11146	24.9889	5.76628e-07	3.63787e-06
FBgn0000575	0.00526882	5.01094	0.00853969	0.926372	0.954949
FBgn0000576	0.0181493	2.5695	0.0104375	0.918626	0.950695
FBgn0000577	0.034522	1.44007	0.0204386	0.886319	0.927893
FBgn0000578	-0.00465016	6.60103	0.006242	0.937028	0.959969
FBgn0000579	-0.253773	10.1434	13.4484	0.000245213	0.000916427
FBgn0000581	0.0569761	8.11606	0.876679	0.349113	0.485167
FBgn0000588	0.139828	4.89062	4.1404	0.0418712	0.0873734
FBgn0000592	-0.450839	10.4927	36.3605	1.63995e-09	1.63597e-08
FBgn0000594	0.176084	1.43998	0.290273	0.590046	0.705444
FBgn0000611	-0.0518359	7.4242	1.15458	0.282593	0.413954
FBgn0000615	-0.468718	10.0698	74.6389	5.65183e-18	2.65917e-16
FBgn0000617	0.55886	4.3516	79.46	4.92094e-19	2.62923e-17
FBgn0000618	0.521917	3.5362	34.8705	3.52375e-09	3.32629e-08
FBgn0000625	-0.484889	1.70629	8.58579	0.00338797	0.00972678
FBgn0000629	-0.0130522	5.82791	0.0484	0.825871	0.886221
FBgn0000633	0.137462	2.861	1.03733	0.308444	0.442499
FBgn0000635	-0.303522	6.82446	28.9672	7.36137e-08	5.49893e-07
FBgn0000636	0.00399363	5.93846	0.00434191	0.947463	0.965742
FBgn0000658	-0.239408	2.19783	1.79496	0.180323	0.291258
FBgn0000659	0.121854	5.66833	2.14719	0.142831	0.241767
FBgn0000662	-0.00967216	6.62881	0.0738514	0.78581	0.85803
FBgn0000667	0.175581	8.89549	6.28551	0.0121729	0.0298623
FBgn0000709	0.253324	6.21644	29.4727	5.67089e-08	4.29037e-07
FBgn0000711	-0.145058	7.2028	9.03283	0.00265173	0.00777353
FBgn0000715	0.523281	2.87194	12.3329	0.00044504	0.00156633
FBgn0000719	-0.169767	5.43857	11.7768	0.000599734	0.00205421
FBgn0000721	-0.0843896	8.52682	2.50718	0.113329	0.200928
FBgn0000723	0.117696	6.47128	3.25071	0.0713927	0.137676
FBgn0000810	-0.0411104	5.99792	1.00109	0.317047	0.452841
FBgn0000826	0.936836	5.13648	157.608	3.76892e-36	2.22767e-33
FBgn0000927	0.792233	6.99598	112.218	3.20054e-26	5.82067e-24
FBgn0000964	-0.303331	5.01112	6.20651	0.0127282	0.0311034
FBgn0001078	0.0266047	7.44756	0.16588	0.683799	0.782608
FBgn0001079	-0.384131	5.05778	35.2985	2.82857e-09	2.71021e-08
FBgn0001083	-0.203779	3.24647	2.43889	0.11836	0.208169
FBgn0001084	0.640351	2.76315	36.2051	1.77603e-09	1.76428e-08
FBgn0001085	0.0160307	6.16077	0.0582477	0.809287	0.874278
FBgn0001086	0.0286163	6.46122	0.165112	0.684493	0.783025
FBgn0001087	0.0246099	6.82511	0.242699	0.622264	0.733576
FBgn0001089	-0.37083	6.38725	14.9091	0.000112817	0.000449794
FBgn0001091	0.773302	10.9327	52.6289	4.02914e-13	7.53035e-12
FBgn0001092	-0.106273	9.42743	3.31257	0.0687519	0.13318
FBgn0001098	-0.279441	9.09611	22.0618	2.64017e-06	1.45672e-05
FBgn0001099	0.00398906	6.21173	0.00233319	0.961475	0.975901
FBgn0001104	0.324536	6.71186	37.0391	1.15786e-09	1.18377e-08
FBgn0001105	0.113164	6.46952	4.8482	0.027675	0.0611581
FBgn0001108	0.0446837	7.2718	1.28912	0.25621	0.383019
FBgn0001112	0.504715	7.80234	16.9417	3.85456e-05	0.000168139
FBgn0001114	0.0116752	7.27833	0.0169157	0.896519	0.935493
FBgn0001122	-0.107245	6.00479	2.30419	0.129026	0.223234
FBgn0001123	-0.221547	5.90782	15.1633	9.86003e-05	0.000398659
FBgn0001124	-0.108232	7.66593	2.88652	0.0893238	0.165181
FBgn0001125	0.122326	7.90263	1.54803	0.213426	0.33186
FBgn0001128	0.60158	9.38626	51.4449	7.36353e-13	1.31143e-11
FBgn0001133	0.273888	5.0513	20.6165	5.6109e-06	2.90912e-05
FBgn0001134	0.0750526	0.520533	0.07699	0.781419	0.854617
FBgn0001137	-0.0726566	5.1205	1.35576	0.244274	0.36879
FBgn0001138	-0.337489	0.851274	2.89118	0.0890658	0.164923
FBgn0001139	0.238996	7.69416	21.2418	4.04836e-06	2.16668e-05
FBgn0001142	0.342326	7.14735	19.0903	1.2468e-05	6.03738e-05
FBgn0001145	0.0379409	9.7809	0.452794	0.501011	0.629475
FBgn0001149	0.111	8.30447	1.72148	0.189503	0.30252
FBgn0001150	-0.35253	3.40867	9.06963	0.00259889	0.00763521
FBgn0001168	-0.228447	6.71961	7.58732	0.00587802	0.0159006
FBgn0001169	0.0279803	6.98388	0.214333	0.643392	0.7497
FBgn0001170	0.465691	0.0906175	1.57523	0.209449	0.326858
FBgn0001179	0.0125212	5.14056	0.0539251	0.816369	0.878916
FBgn0001180	0.0605522	5.18238	0.730627	0.39268	0.527571
FBgn0001185	-0.00246075	4.85768	0.00213202	0.963172	0.976387
FBgn0001186	-0.267733	8.72009	41.9099	9.5579e-11	1.19222e-09
FBgn0001187	0.107196	6.92357	1.35169	0.244983	0.369448
FBgn0001189	-0.108819	5.94885	6.20937	0.0127076	0.0310612
FBgn0001197	-0.250302	7.82394	28.8912	7.6558e-08	5.6919e-07
FBgn0001202	-0.0382049	5.46072	0.714125	0.398078	0.533067
FBgn0001208	0.202991	7.81128	4.39326	0.0360813	0.076973
FBgn0001215	-0.0689915	8.67751	2.05022	0.152184	0.254907
FBgn0001216	-0.210039	7.59519	10.4954	0.00119674	0.00383906
FBgn0001217	-0.824254	7.19478	47.6694	5.04502e-12	7.82144e-11
FBgn0001218	0.00782205	9.83251	0.0163992	0.898102	0.936526
FBgn0001219	0.0229471	11.5551	0.328367	0.566622	0.686553
FBgn0001220	-0.120172	8.90813	10.911	0.000955925	0.00313026
FBgn0001222	-0.0772765	6.73056	2.50806	0.113266	0.200854
FBgn0001223	0.268427	5.60851	0.362178	0.547299	0.670876
FBgn0001224	-0.627256	4.21311	27.7986	1.34621e-07	9.56508e-07
FBgn0001225	0.0326205	8.65305	0.102314	0.74907	0.832037
FBgn0001226	0.328158	7.93719	18.818	1.43803e-05	6.83735e-05
FBgn0001227	-0.248333	2.61008	3.00331	0.0830946	0.155856
FBgn0001229	-0.253812	1.0923	1.55286	0.212714	0.331188
FBgn0001233	-0.631783	10.7671	186.242	2.10246e-42	1.9883e-39
FBgn0001235	-0.274071	6.39603	5.83612	0.0157004	0.0372969
FBgn0001247	-0.116018	6.84894	7.33578	0.00675955	0.0179666
FBgn0001248	-0.0329285	8.87448	0.370889	0.54252	0.667354
FBgn0001250	-0.0477227	7.01178	0.515	0.472982	0.604459
FBgn0001253	0.479465	2.50161	2.95515	0.0856042	0.159771
FBgn0001257	-0.0296332	5.1757	0.0975586	0.754779	0.836021
FBgn0001258	0.121621	5.51824	1.75435	0.18533	0.297416
FBgn0001259	-0.219093	1.08344	0.917266	0.338194	0.474225
FBgn0001263	0.525763	6.34796	52.0568	5.3919e-13	9.8249e-12
FBgn0001269	-0.122247	1.67297	0.294581	0.5873	0.703098
FBgn0001276	0.0858588	3.22788	0.95818	0.327646	0.463369
FBgn0001280	0.162046	5.36331	7.39238	0.00655009	0.0174737
FBgn0001281	0.756939	7.33051	24.9315	5.94043e-07	3.73776e-06
FBgn0001285	-0.290919	5.3565	1.33317	0.248241	0.373527
FBgn0001291	0.0406152	5.63986	0.451832	0.501466	0.62992
FBgn0001296	0.203779	6.11472	11.194	0.000820622	0.00272853
FBgn0001297	0.000937324	8.64663	0.000245859	0.98749	0.99179
FBgn0001301	-0.0110838	6.66822	0.0289696	0.864849	0.913637
FBgn0001308	0.00814509	7.83269	0.0451782	0.831677	0.889775
FBgn0001311	0.19948	2.22094	1.18974	0.275382	0.406031
FBgn0001316	-0.0585293	8.1931	1.70221	0.191999	0.305473
FBgn0001319	0.709428	1.08268	7.98342	0.00472078	0.0130845
FBgn0001320	0.0724335	3.14949	0.438275	0.507956	0.636173
FBgn0001321	-0.0723861	1.4359	0.112529	0.737283	0.823976
FBgn0001323	0.0148869	3.48739	0.0175606	0.894576	0.934188
FBgn0001324	-0.0302421	6.75247	0.303462	0.58172	0.699114
FBgn0001330	-0.0949186	4.87068	2.45256	0.117334	0.206788
FBgn0001332	0.0968273	6.65503	4.01808	0.045015	0.0930304
FBgn0001337	0.0171344	6.70304	0.173733	0.676815	0.776965
FBgn0001341	-0.0213458	6.08064	0.238023	0.625638	0.736014
FBgn0001404	-0.13677	7.54815	7.88651	0.0049805	0.013732
FBgn0001491	0.112229	5.25299	2.20138	0.137887	0.235125
FBgn0001565	0.288357	6.67026	28.6826	8.52646e-08	6.25561e-07
FBgn0001624	-0.0977118	7.40112	2.44128	0.11818	0.207892
FBgn0001941	0.214416	6.17828	14.0594	0.000177126	0.000678435
FBgn0001942	0.0541248	10.6796	1.5961	0.206457	0.323148
FBgn0001961	-0.0649572	6.9394	2.10234	0.147073	0.247663
FBgn0001965	0.0802729	6.41665	3.56489	0.0590136	0.117025
FBgn0001970	0.583542	4.74191	59.81	1.04473e-14	2.59319e-13
FBgn0001974	0.0436142	4.95881	0.461465	0.49694	0.625857
FBgn0001977	0.0462906	5.59105	0.571128	0.449811	0.582726
FBgn0001978	0.0979745	7.71465	4.62303	0.0315454	0.0687625
FBgn0001981	0.40458	2.24691	7.30717	0.00686799	0.0181985
FBgn0001990	-0.266847	4.9476	22.4373	2.17122e-06	1.21786e-05
FBgn0001991	-0.298781	6.80663	13.1818	0.000282677	0.00104181
FBgn0001994	0.04751	7.13678	1.03517	0.308948	0.442954
FBgn0001995	0.326494	4.94829	16.7282	4.31341e-05	0.000186179
FBgn0002021	0.0702462	5.22395	1.81677	0.177699	0.287855
FBgn0002022	-0.00238326	6.27709	0.00318547	0.954991	0.971531
FBgn0002023	0.230596	3.67442	3.91962	0.0477257	0.0978201
FBgn0002031	0.409236	7.31579	65.6649	5.34502e-16	1.65097e-14
FBgn0002036	-0.146387	6.90972	6.61022	0.0101395	0.0255569
FBgn0002044	-0.422046	7.3755	86.7921	1.20548e-20	8.97653e-19
FBgn0002069	0.152751	7.3623	14.889	0.000114027	0.000454428
FBgn0002121	-0.0323398	7.81948	0.196092	0.657894	0.761623
FBgn0002174	0.326156	6.65474	35.1954	2.98226e-09	2.8402e-08
FBgn0002183	-0.148071	7.60629	12.6961	0.000366413	0.00131406
FBgn0002283	0.439464	5.91496	67.4689	2.14038e-16	7.12731e-15
FBgn0002284	0.00966029	6.88472	0.0287889	0.865267	0.913875
FBgn0002306	0.0312367	5.39316	0.158581	0.690466	0.787284
FBgn0002354	-0.163652	3.88913	4.40479	0.0358381	0.0765576
FBgn0002413	-0.03306	7.12902	0.307856	0.578999	0.69666
FBgn0002431	-0.0655861	8.77851	0.955424	0.328343	0.464195
FBgn0002441	-0.137853	6.69526	8.22078	0.00414133	0.0116561
FBgn0002466	0.131322	5.91568	3.74483	0.0529711	0.106926
FBgn0002521	0.0723092	6.95845	1.16196	0.28106	0.412291
FBgn0002522	0.0844421	2.33406	0.341976	0.558691	0.68008
FBgn0002524	0.250387	6.60319	30.7781	2.89282e-08	2.2741e-07
FBgn0002525	0.196164	7.28701	20.9474	4.72071e-06	2.4885e-05
FBgn0002526	-0.237863	7.17466	6.34694	0.0117584	0.0290413
FBgn0002528	-0.12212	6.05087	2.50854	0.113231	0.20083
FBgn0002542	-0.589547	7.41979	141.284	1.39473e-32	4.71069e-30
FBgn0002543	0.139986	4.37545	0.752078	0.385819	0.522062
FBgn0002552	-0.194372	5.68667	10.9649	0.000928525	0.00305004
FBgn0002564	-0.509422	0.574235	2.92241	0.0873571	0.162497
FBgn0002565	-3.76679	8.09013	61.3713	4.72646e-15	1.26983e-13
FBgn0002567	-0.0823913	7.57806	2.2925	0.130001	0.224469
FBgn0002569	0.124215	5.54211	0.731183	0.3925	0.527404
FBgn0002570	0.0343007	10.4488	0.053933	0.816356	0.878916
FBgn0002571	0.0837945	6.31799	0.480258	0.488305	0.618773
FBgn0002573	0.362204	1.26747	1.46908	0.225492	0.346349
FBgn0002576	-0.296012	0.681909	1.62751	0.202048	0.317879
FBgn0002577	-0.296624	1.46141	3.59311	0.0580196	0.115344
FBgn0002578	0.301831	4.71729	11.2876	0.00078027	0.00261204
FBgn0002579	0.440595	9.35231	33.8266	6.02496e-09	5.39055e-08
FBgn0002590	-0.0611318	9.47314	1.68587	0.194146	0.307958
FBgn0002592	-0.0945021	0.238388	0.206202	0.649761	0.753869
FBgn0002593	0.478836	10.0924	44.9644	2.00653e-11	2.80707e-10
FBgn0002607	0.283471	10.7819	34.2017	4.96843e-09	4.56418e-08
FBgn0002609	0.239124	2.06142	3.62435	0.0569397	0.11353
FBgn0002622	0.403801	10.2068	51.3006	7.92502e-13	1.4035e-11
FBgn0002626	0.194357	9.8976	15.6802	7.50064e-05	0.000310431
FBgn0002638	0.492756	7.55576	64.1372	1.16052e-15	3.419e-14
FBgn0002641	0.262681	4.96266	10.8184	0.00100494	0.00327828
FBgn0002643	0.001126	6.70493	0.000343427	0.985215	0.990451
FBgn0002645	-0.121572	8.01053	3.4916	0.0616808	0.121423
FBgn0002652	0.211453	4.30504	6.17483	0.012958	0.0315835
FBgn0002673	-0.537101	6.22833	68.981	9.94161e-17	3.56128e-15
FBgn0002707	-0.092457	4.37338	2.00282	0.157007	0.261457
FBgn0002709	-0.150554	6.75428	4.09347	0.0430493	0.089437
FBgn0002715	0.151376	5.75326	3.49162	0.06168	0.121423
FBgn0002716	0.242029	0.824745	1.31979	0.250629	0.376103
FBgn0002719	-0.188352	8.98781	7.76083	0.00533913	0.0146016
FBgn0002723	-0.138261	5.19003	5.56584	0.0183143	0.0426911
FBgn0002733	-0.159894	2.08906	1.43453	0.231027	0.352903
FBgn0002736	0.351804	5.19665	33.0635	8.9197e-09	7.66851e-08
FBgn0002772	-0.427054	9.15185	14.5121	0.000139265	0.000545101
FBgn0002773	-0.286724	9.75211	4.86209	0.027453	0.0607305
FBgn0002774	-0.297021	6.09407	25.9112	3.57484e-07	2.3396e-06
FBgn0002775	0.16185	4.55278	7.8892	0.00497308	0.0137155
FBgn0002778	-0.216443	6.23645	18.5336	1.66939e-05	7.84662e-05
FBgn0002780	-0.0765936	8.40013	2.28147	0.130927	0.225763
FBgn0002781	0.230653	8.27902	17.6152	2.70416e-05	0.000121901
FBgn0002783	0.0664365	7.54818	1.99907	0.157396	0.26192
FBgn0002787	0.189116	7.21274	14.6411	0.00013005	0.000510747
FBgn0002789	-0.130413	8.02513	5.50093	0.0190064	0.044098
FBgn0002791	0.0197279	5.10857	0.137502	0.710777	0.803869
FBgn0002868	0.983701	9.4483	58.5981	1.93406e-14	4.49396e-13
FBgn0002869	0.687963	3.22479	3.67428	0.055258	0.110762
FBgn0002872	-0.0076705	6.3407	0.0259591	0.872	0.918729
FBgn0002878	0.17001	5.80092	6.73191	0.0094703	0.0241013
FBgn0002887	0.00261114	5.62368	0.00190864	0.965153	0.977415
FBgn0002891	-0.0276655	5.25018	0.128828	0.719651	0.810587
FBgn0002899	-0.097312	4.797	1.08631	0.297291	0.43068
FBgn0002901	0.114905	4.35789	2.2199	0.136242	0.232949
FBgn0002909	-0.104802	5.37755	2.4764	0.115567	0.204206
FBgn0002914	-0.4437	7.34707	113.059	2.09457e-26	3.96167e-24
FBgn0002917	0.360508	4.72407	17.4355	2.97216e-05	0.000132897
FBgn0002921	-0.347677	11.2361	49.8048	1.69826e-12	2.86282e-11
FBgn0002922	-0.113837	1.9866	0.259985	0.610131	0.722877
FBgn0002924	0.373923	6.01592	26.0964	3.24786e-07	2.1464e-06
FBgn0002926	-0.486404	4.80668	5.73057	0.0166721	0.0392404
FBgn0002930	0.380754	6.92263	28.0701	1.17e-07	8.4142e-07
FBgn0002931	0.165645	3.06487	1.5827	0.208373	0.325447
FBgn0002932	0.0458923	5.95978	0.595234	0.440402	0.573834
FBgn0002936	0.124096	3.05696	0.463813	0.495847	0.624897
FBgn0002937	-0.433211	4.07035	12.354	0.000440048	0.0015505
FBgn0002938	0.13356	9.03263	3.30214	0.0691899	0.133782
FBgn0002939	-1.48842	5.68257	47.2886	6.12664e-12	9.3602e-11
FBgn0002940	0.232137	12.0538	12.7124	0.000363238	0.00130366
FBgn0002941	0.471539	0.984741	3.48198	0.0620404	0.122029
FBgn0002945	-0.204318	4.46626	2.82267	0.0929419	0.170803
FBgn0002948	0.446117	5.42788	23.0087	1.6127e-06	9.29959e-06
FBgn0002962	0.38642	6.63399	6.67723	0.00976525	0.0247388
FBgn0002973	-0.27205	6.91831	38.6801	4.99269e-10	5.43962e-09
FBgn0002985	-0.0734961	3.98313	0.480601	0.48815	0.61866
FBgn0002989	-0.399873	4.74538	33.0652	8.91189e-09	7.66851e-08
FBgn0003002	-0.18343	1.09682	0.993936	0.318782	0.454589
FBgn0003008	-0.152068	4.02915	5.33614	0.0208877	0.0478409
FBgn0003011	0.412878	1.639	3.40704	0.0649189	0.126742
FBgn0003016	-0.0397356	6.94073	0.779021	0.377441	0.513295
FBgn0003022	0.0506118	6.32279	0.724399	0.394705	0.529224
FBgn0003023	-0.0873574	7.10494	2.05258	0.151949	0.254603
FBgn0003028	-0.372536	7.84181	43.5118	4.21406e-11	5.55047e-10
FBgn0003041	-0.213821	6.67467	18.7575	1.48439e-05	7.04358e-05
FBgn0003042	-0.069641	4.3507	1.05792	0.30369	0.437537
FBgn0003044	0.0765558	7.10407	2.29637	0.129677	0.224015
FBgn0003048	0.00876264	6.73853	0.018572	0.891601	0.931698
FBgn0003053	-0.127553	6.07958	2.69491	0.100669	0.182423
FBgn0003062	0.610927	6.10121	90.5206	1.83059e-21	1.55963e-19
FBgn0003067	0.26871	9.08591	1.33415	0.248068	0.373339
FBgn0003068	-0.356014	6.0795	15.7465	7.24215e-05	0.00030039
FBgn0003071	0.152154	8.81	6.68559	0.00971955	0.0246561
FBgn0003074	-0.221403	9.4219	20.8328	5.0117e-06	2.62726e-05
FBgn0003076	-0.262598	8.50161	14.8475	0.00011656	0.000463936
FBgn0003079	-0.356349	5.83621	54.4617	1.5851e-13	3.16919e-12
FBgn0003082	0.705741	4.04763	72.1372	2.00745e-17	8.40022e-16
FBgn0003087	0.0132406	5.54866	0.0164678	0.89789	0.936526
FBgn0003089	-0.484207	1.22167	4.79902	0.028476	0.0627733
FBgn0003090	0.125318	3.42901	1.24141	0.2652	0.39404
FBgn0003091	-0.423019	5.62369	35.6255	2.39142e-09	2.31718e-08
FBgn0003093	-0.114339	7.01485	4.8474	0.0276878	0.0611641
FBgn0003116	0.10766	4.54869	3.15275	0.0757994	0.144436
FBgn0003117	-0.0976268	1.92439	0.476198	0.49015	0.620113
FBgn0003118	-0.121666	4.35767	2.92136	0.0874142	0.16254
FBgn0003124	0.052578	7.89617	1.23016	0.267376	0.396598
FBgn0003129	0.63652	1.8028	10.0039	0.00156205	0.00489312
FBgn0003134	-0.0267859	7.26932	0.254255	0.614095	0.726391
FBgn0003138	0.0333186	7.6413	0.737575	0.390439	0.525818
FBgn0003139	0.312375	5.91978	45.9772	1.19638e-11	1.74064e-10
FBgn0003141	-0.147287	5.45059	6.96539	0.00831012	0.0215253
FBgn0003149	-0.216455	9.7932	9.02889	0.00265746	0.00778551
FBgn0003159	-0.0862133	7.83601	2.10305	0.147006	0.247637
FBgn0003162	-0.279384	6.14021	13.4359	0.00024685	0.000921984
FBgn0003169	-0.0140022	6.38631	0.0822955	0.77421	0.850023
FBgn0003174	0.866215	1.28292	16.9378	3.86257e-05	0.000168333
FBgn0003175	0.0597472	6.96812	0.958915	0.32746	0.463176
FBgn0003178	-0.216625	10.3043	11.1935	0.000820837	0.00272853
FBgn0003189	0.208001	6.54267	10.3528	0.00129275	0.00412051
FBgn0003204	0.432884	7.42954	102.228	4.94945e-24	6.24093e-22
FBgn0003205	-0.300856	6.9329	51.4749	7.25198e-13	1.29645e-11
FBgn0003206	-0.123457	5.93882	5.96368	0.0146035	0.0350344
FBgn0003209	-0.104749	6.87242	3.78526	0.051706	0.10482
FBgn0003210	-0.446393	6.74093	101.163	8.47038e-24	1.04032e-21
FBgn0003218	0.0641382	7.61993	2.05354	0.151853	0.254603
FBgn0003227	0.52097	3.26133	30.1645	3.96907e-08	3.05664e-07
FBgn0003231	-0.142383	9.14808	11.4444	0.000717099	0.00241941
FBgn0003248	0.168507	4.70543	3.28929	0.069733	0.134722
FBgn0003249	0.226815	6.62244	10.9267	0.000947868	0.0031071
FBgn0003250	0.2834	6.97581	12.7811	0.000350145	0.00126386
FBgn0003254	-0.257229	3.01134	2.28635	0.130517	0.225278
FBgn0003255	0.176926	1.36275	0.870969	0.350687	0.486354
FBgn0003257	0.332685	5.64743	22.2594	2.38191e-06	1.32427e-05
FBgn0003261	-0.0869409	10.0511	5.03912	0.0247811	0.0555081
FBgn0003268	0.0385127	6.25927	0.336342	0.561949	0.682896
FBgn0003274	0.405494	9.00913	35.2526	2.89592e-09	2.76913e-08
FBgn0003275	0.5468	5.2809	58.821	1.72688e-14	4.06247e-13
FBgn0003277	-0.00442859	7.68621	0.00613022	0.937593	0.960132
FBgn0003278	-0.0432189	5.28737	0.487782	0.484918	0.615636
FBgn0003279	0.191149	10.8062	13.287	0.000267256	0.0009896
FBgn0003285	-0.571808	2.86612	18.9927	1.31217e-05	6.31192e-05
FBgn0003292	-0.38486	4.4219	40.2173	2.27224e-10	2.62154e-09
FBgn0003295	-0.161837	0.995534	0.460401	0.497437	0.626232
FBgn0003301	-0.271709	6.93212	21.2089	4.11843e-06	2.19921e-05
FBgn0003302	0.364296	4.64995	12.8935	0.00032973	0.00119703
FBgn0003308	0.341458	5.10931	10.7235	0.00105784	0.00342954
FBgn0003310	0.0107775	6.41165	0.0596836	0.806997	0.872501
FBgn0003317	-0.337336	5.85129	46.0575	1.14834e-11	1.68109e-10
FBgn0003321	-0.0150184	6.81032	0.154793	0.693996	0.790357
FBgn0003326	0.00326992	4.6615	0.00042576	0.983538	0.989114
FBgn0003328	0.239147	5.81941	11.9319	0.000551814	0.00190526
FBgn0003330	0.375315	4.78683	39.6117	3.09825e-10	3.47982e-09
FBgn0003334	0.0520457	6.84022	1.05153	0.305154	0.439045
FBgn0003339	0.110853	2.63581	0.510119	0.475087	0.605918
FBgn0003345	-0.263069	6.74461	26.219	3.04805e-07	2.02283e-06
FBgn0003346	0.0206391	6.29675	0.208219	0.648167	0.752945
FBgn0003353	-0.0815797	3.83129	0.862301	0.353095	0.488333
FBgn0003358	-1.48811	6.36015	84.5227	3.79829e-20	2.51192e-18
FBgn0003360	-0.508937	10.9739	51.3296	7.80892e-13	1.38553e-11
FBgn0003366	-0.169317	6.2366	4.23122	0.0396868	0.083534
FBgn0003371	-0.26003	8.87837	25.7987	3.78937e-07	2.47657e-06
FBgn0003380	-0.159694	6.19966	0.808967	0.368426	0.503716
FBgn0003386	0.437387	3.64952	11.2022	0.000817008	0.00271866
FBgn0003388	0.0754172	1.14544	0.106837	0.743774	0.828489
FBgn0003390	0.561385	4.99682	37.7	8.25038e-10	8.6501e-09
FBgn0003391	0.0214081	7.03353	0.195266	0.658569	0.761668
FBgn0003392	-0.154931	8.33622	15.5592	7.99619e-05	0.000329499
FBgn0003396	-0.106967	7.12303	1.35319	0.244722	0.369239
FBgn0003401	0.0151062	5.06373	0.0795109	0.777961	0.852413
FBgn0003410	-0.168054	5.27996	5.9409	0.0147934	0.0354091
FBgn0003415	-0.0163674	7.77547	0.0399989	0.841483	0.895461
FBgn0003416	0.0365843	5.8778	0.467994	0.493911	0.623109
FBgn0003423	-0.191876	8.13727	33.1316	8.61283e-09	7.45211e-08
FBgn0003429	-0.471308	7.45324	29.678	5.1011e-08	3.88728e-07
FBgn0003430	-0.019229	1.37465	0.00901413	0.92436	0.954092
FBgn0003435	-0.725804	9.20018	82.7187	9.46003e-20	5.80932e-18
FBgn0003444	0.0662452	5.03681	0.992711	0.319081	0.454861
FBgn0003447	-0.209633	6.88245	13.502	0.000238314	0.000893274
FBgn0003449	0.418203	5.66545	58.9388	1.62655e-14	3.84557e-13
FBgn0003450	0.471462	2.23507	16.1916	5.72473e-05	0.000241409
FBgn0003459	0.0576757	5.80647	0.997676	0.317874	0.45355
FBgn0003460	-0.152805	3.40486	1.73121	0.188257	0.30109
FBgn0003462	-0.13978	9.12307	8.36779	0.0038193	0.0108343
FBgn0003463	-0.100133	6.41568	1.8642	0.172141	0.28063
FBgn0003464	0.393116	7.77762	66.5898	3.3432e-16	1.07907e-14
FBgn0003475	-0.0294018	7.99185	0.479558	0.488623	0.618931
FBgn0003479	0.512873	4.06054	43.3981	4.46625e-11	5.85005e-10
FBgn0003480	0.517582	3.28981	28.9344	7.48726e-08	5.57975e-07
FBgn0003483	-0.0304799	6.2778	0.222803	0.636912	0.744742
FBgn0003495	0.0049114	6.17401	0.0071711	0.932514	0.957835
FBgn0003499	-0.381493	4.06705	12.8577	0.000336093	0.00121704
FBgn0003502	0.0514423	6.93076	1.00737	0.315533	0.451196
FBgn0003507	0.118841	6.04142	1.93016	0.164741	0.271232
FBgn0003510	0.447602	2.66152	16.9975	3.7429e-05	0.000163646
FBgn0003511	0.550253	3.15401	32.4854	1.20092e-08	1.01042e-07
FBgn0003512	0.32552	4.38381	24.4361	7.68152e-07	4.73252e-06
FBgn0003513	-0.0598679	1.89961	0.11979	0.729263	0.817524
FBgn0003514	-0.00788894	7.1297	0.0442853	0.833324	0.891084
FBgn0003515	0.258897	4.37165	7.09245	0.00774095	0.0201892
FBgn0003517	0.27525	10.6147	24.222	8.5844e-07	5.23759e-06
FBgn0003520	-0.029366	7.97716	0.320421	0.571355	0.690077
FBgn0003525	0.0304401	7.20065	0.21346	0.644069	0.750055
FBgn0003527	0.0429393	3.62399	0.416225	0.518827	0.646833
FBgn0003545	-0.395649	6.13831	52.2968	4.77152e-13	8.81334e-12
FBgn0003557	-0.0814847	7.51179	3.81893	0.0506767	0.102998
FBgn0003559	0.0552898	5.41229	1.80136	0.179548	0.290353
FBgn0003567	-0.199625	6.64539	12.4987	0.000407241	0.00144568
FBgn0003575	0.00374884	6.64658	0.00518138	0.942616	0.962878
FBgn0003598	0.0458741	7.33225	0.608077	0.435513	0.569188
FBgn0003607	-0.116003	6.99968	6.71935	0.00953724	0.0242587
FBgn0003612	0.0423088	7.59058	0.732221	0.392164	0.527103
FBgn0003638	-0.0575002	7.86689	2.04283	0.152925	0.255649
FBgn0003651	0.340574	6.05738	22.9728	1.64308e-06	9.45037e-06
FBgn0003654	0.0846012	4.60039	1.68391	0.194406	0.308173
FBgn0003655	0.553028	7.1168	52.8643	3.5741e-13	6.74656e-12
FBgn0003656	-0.0362495	7.83826	0.872882	0.350159	0.48614
FBgn0003660	-0.0181314	7.04182	0.141897	0.706403	0.801053
FBgn0003676	0.393472	7.68008	75.2787	4.08739e-18	1.96215e-16
FBgn0003687	-0.253403	5.05848	17.0838	3.57668e-05	0.000157251
FBgn0003701	0.0913604	6.10352	0.746821	0.387485	0.523125
FBgn0003710	-0.0312895	2.35475	0.0410201	0.839499	0.894675
FBgn0003714	0.404679	4.32062	39.5407	3.21295e-10	3.60437e-09
FBgn0003715	-0.670547	2.27679	19.1858	1.18595e-05	5.75746e-05
FBgn0003716	-0.0279805	6.89266	0.366102	0.545137	0.66907
FBgn0003721	-0.36426	9.59527	42.3135	7.7755e-11	9.80439e-10
FBgn0003731	-0.216492	6.53669	20.411	6.24711e-06	3.21081e-05
FBgn0003732	0.061767	8.02445	2.1027	0.147039	0.247649
FBgn0003733	-0.495437	5.89269	58.7212	1.81674e-14	4.23176e-13
FBgn0003741	0.0299737	3.98953	0.194622	0.659097	0.761897
FBgn0003742	0.357068	4.80827	35.5357	2.50416e-09	2.42146e-08
FBgn0003744	-0.20852	6.68334	35.7173	2.28132e-09	2.22417e-08
FBgn0003748	-0.343528	9.23933	63.014	2.0524e-15	5.82868e-14
FBgn0003861	0.0561327	8.79096	0.538349	0.463118	0.59523
FBgn0003862	-0.0458739	7.33852	0.195946	0.658013	0.761653
FBgn0003863	0.397812	11.2935	23.5756	1.20098e-06	7.11189e-06
FBgn0003866	-0.156287	4.04498	3.63782	0.056481	0.112807
FBgn0003867	0.30834	5.1734	6.76614	0.00929035	0.0236944
FBgn0003870	0.00965815	7.11087	0.0466865	0.828933	0.888802
FBgn0003882	0.0824358	5.70821	2.04822	0.152384	0.255152
FBgn0003884	0.0643566	10.3395	2.40053	0.121294	0.212225
FBgn0003885	0.216228	8.47567	13.6813	0.000216603	0.000817077
FBgn0003886	-0.506244	4.27559	17.2298	3.31196e-05	0.000146771
FBgn0003887	0.333955	9.92369	32.574	1.14742e-08	9.68852e-08
FBgn0003888	0.109492	5.25875	1.48428	0.223106	0.343579
FBgn0003889	-0.744966	8.90213	30.4353	3.45194e-08	2.68242e-07
FBgn0003890	0.560812	6.54605	70.1881	5.39105e-17	2.05577e-15
FBgn0003891	-0.118743	8.77106	1.87466	0.170942	0.279254
FBgn0003892	-0.136445	4.39075	2.40199	0.121181	0.212067
FBgn0003896	-0.0201444	2.48221	0.0207812	0.885377	0.927346
FBgn0003900	-0.349262	0.810375	1.97647	0.159762	0.265158
FBgn0003941	-0.149073	9.90188	8.90081	0.00285045	0.00829181
FBgn0003942	0.221025	10.3524	17.519	2.84446e-05	0.000127609
FBgn0003961	1.46788	3.90724	12.3627	0.000437992	0.0015444
FBgn0003963	-0.00657766	4.9423	0.00439063	0.947169	0.965704
FBgn0003964	-0.038681	6.64424	0.896747	0.343655	0.479556
FBgn0003965	0.205601	4.74839	5.88023	0.0153119	0.0364838
FBgn0003969	-0.489554	6.10267	150.682	1.23011e-34	6.12273e-32
FBgn0003975	0.036084	3.451	0.07784	0.780246	0.853631
FBgn0003977	-0.220406	5.5392	14.8277	0.000117793	0.000467659
FBgn0003978	0.614512	4.95474	52.0815	5.32455e-13	9.72089e-12
FBgn0003984	-0.50452	4.38638	28.5392	9.18202e-08	6.71573e-07
FBgn0003996	0.25589	4.26473	7.37248	0.00662294	0.0176355
FBgn0003997	-0.190069	4.21115	2.91689	0.0876566	0.16283
FBgn0004003	-0.0879384	4.43879	0.423664	0.515114	0.643349
FBgn0004009	0.297515	1.93213	2.08673	0.148584	0.249762
FBgn0004028	-0.228571	9.31079	7.85732	0.00506154	0.0139351
FBgn0004047	-0.0331838	11.2967	0.0201903	0.887007	0.928222
FBgn0004049	0.0150965	6.57804	0.0910006	0.762909	0.841969
FBgn0004050	0.130428	5.81298	5.71702	0.0168012	0.0395148
FBgn0004055	-0.366222	6.73809	37.5477	8.92024e-10	9.29061e-09
FBgn0004057	-0.100053	7.55068	2.49753	0.114025	0.201897
FBgn0004066	0.302209	7.19373	39.9686	2.58074e-10	2.93343e-09
FBgn0004087	0.616822	2.99784	32.5772	1.1455e-08	9.68098e-08
FBgn0004101	-0.299466	5.05639	23.1305	1.51371e-06	8.76079e-06
FBgn0004102	0.507068	1.1394	5.01592	0.0251153	0.0560973
FBgn0004103	-0.379459	6.99207	99.5894	1.87509e-23	2.13647e-21
FBgn0004106	-0.0121931	5.9519	0.0289258	0.86495	0.913642
FBgn0004107	0.0728907	5.45431	0.853967	0.355432	0.490561
FBgn0004108	0.0203179	5.04314	0.108216	0.742185	0.827401
FBgn0004117	-0.156755	9.55611	3.57371	0.058701	0.116527
FBgn0004118	0.0570277	3.28307	0.203844	0.651636	0.755489
FBgn0004132	0.471699	4.79191	35.6315	2.38407e-09	2.31242e-08
FBgn0004133	0.327589	5.68995	20.7581	5.21109e-06	2.7219e-05
FBgn0004167	-0.190116	9.08422	4.86122	0.0274669	0.0607471
FBgn0004168	0.564595	2.50183	6.7608	0.00931822	0.0237527
FBgn0004169	-0.16134	9.86584	4.29533	0.0382172	0.0808727
FBgn0004177	-0.344781	8.72504	49.97	1.56116e-12	2.66496e-11
FBgn0004179	0.0196291	6.7273	0.232032	0.630021	0.739128
FBgn0004197	0.280415	2.09473	3.43913	0.0636692	0.124766
FBgn0004198	-0.191204	5.48457	2.88898	0.0891876	0.164995
FBgn0004227	-0.0850856	6.97516	3.7612	0.0524548	0.106144
FBgn0004228	0.169034	5.212	2.46514	0.116397	0.205521
FBgn0004237	0.0211766	7.64339	0.292053	0.588908	0.704529
FBgn0004242	-0.238762	8.45228	5.09698	0.0239675	0.0539155
FBgn0004244	-0.219718	4.78996	1.37868	0.240326	0.363991
FBgn0004359	0.162345	5.09349	7.06723	0.00785065	0.0204359
FBgn0004360	-0.0437272	1.86204	0.0514065	0.820634	0.882302
FBgn0004362	-0.333244	9.04049	24.902	6.03184e-07	3.78317e-06
FBgn0004363	-0.175061	10.1674	8.25391	0.00406643	0.0114726
FBgn0004364	-0.323039	5.68402	31.2763	2.238e-08	1.7921e-07
FBgn0004366	-0.206401	5.26917	6.63607	0.00999339	0.0252289
FBgn0004367	-0.106348	3.85886	1.21076	0.271182	0.400964
FBgn0004368	-0.107973	6.69815	3.1439	0.0762116	0.145119
FBgn0004369	-0.279414	6.26509	15.8505	6.85481e-05	0.000285955
FBgn0004370	-0.0288111	6.25612	0.178193	0.672931	0.773916
FBgn0004373	0.00409265	7.96844	0.006823	0.934168	0.958597
FBgn0004374	0.444003	5.97605	50.6204	1.12072e-12	1.95186e-11
FBgn0004378	0.0997367	6.05396	1.69499	0.192945	0.306427
FBgn0004379	-0.560892	6.56219	101.122	8.64911e-24	1.04865e-21
FBgn0004380	-0.0375372	4.75619	0.175875	0.674943	0.775421
FBgn0004381	-0.0258671	5.62624	0.243482	0.621703	0.733097
FBgn0004387	0.017176	6.72882	0.107641	0.742846	0.827748
FBgn0004390	0.0595837	6.7862	1.08241	0.298159	0.43153
FBgn0004391	-0.0181043	6.44439	0.124126	0.724602	0.814133
FBgn0004394	0.411541	1.32896	4.73652	0.0295288	0.064792
FBgn0004395	0.0534201	5.86409	0.551677	0.457633	0.590026
FBgn0004396	-0.392949	5.82205	15.9474	6.51269e-05	0.000272163
FBgn0004397	-0.101134	7.27078	5.35245	0.0206932	0.0474529
FBgn0004400	0.0379566	5.42332	0.29479	0.587167	0.703069
FBgn0004401	0.00197077	8.59162	0.0027621	0.958086	0.973946
FBgn0004406	0.342602	4.86364	24.9212	5.97209e-07	3.75269e-06
FBgn0004407	-0.333388	3.92583	14.3815	0.000149261	0.000580219
FBgn0004419	-0.0338292	9.92622	0.344572	0.557202	0.678967
FBgn0004432	-0.0221548	9.81506	0.177392	0.673624	0.774242
FBgn0004435	-0.311541	8.04486	32.3438	1.2917e-08	1.08103e-07
FBgn0004436	-0.353455	7.43804	45.5147	1.51498e-11	2.1675e-10
FBgn0004449	-0.224361	7.88944	9.53286	0.00201825	0.00613012
FBgn0004456	-0.13972	5.83486	6.05013	0.0139053	0.0336065
FBgn0004462	0.0881768	6.48993	3.71967	0.0537749	0.108225
FBgn0004463	0.070898	4.90456	1.92231	0.165603	0.272319
FBgn0004465	0.320374	5.83739	54.1275	1.87895e-13	3.70965e-12
FBgn0004507	-0.251022	10.2248	11.4965	0.000697283	0.00235676
FBgn0004509	-0.00454437	7.10965	0.00758265	0.930609	0.957209
FBgn0004510	0.238186	5.05042	11.5318	0.000684156	0.00231487
FBgn0004511	-0.019124	-0.200853	0.00481542	0.944677	0.963823
FBgn0004512	0.159374	7.10686	3.60008	0.0577767	0.114958
FBgn0004513	-0.121735	4.45302	2.5048	0.1135	0.201118
FBgn0004514	-0.133771	1.29401	0.460046	0.497603	0.626275
FBgn0004516	-0.0865972	6.9948	1.95151	0.162424	0.268446
FBgn0004552	0.218726	3.26431	2.81559	0.0933527	0.171406
FBgn0004556	0.0485236	4.68889	0.956323	0.328115	0.463963
FBgn0004567	-0.259466	0.382074	1.06075	0.303045	0.437008
FBgn0004569	0.269433	3.80996	7.80375	0.00521378	0.0143001
FBgn0004573	0.461071	0.994615	2.86513	0.0905186	0.167129
FBgn0004574	-0.133971	7.02849	10.6866	0.00107914	0.00348786
FBgn0004575	-0.219918	6.61372	6.10047	0.0135146	0.0328048
FBgn0004577	-0.243686	0.510735	0.716055	0.397441	0.532304
FBgn0004580	-0.0420646	6.47153	0.328625	0.56647	0.686456
FBgn0004581	-0.656604	5.25961	12.9465	0.000320513	0.00116895
FBgn0004583	-0.0890362	6.20365	1.32083	0.250442	0.375942
FBgn0004584	-0.317685	6.15146	40.4251	2.04303e-10	2.38236e-09
FBgn0004587	-0.096572	7.9943	8.21329	0.00415846	0.011687
FBgn0004595	0.00986646	6.90341	0.00438176	0.947223	0.965704
FBgn0004597	0.0715698	4.26155	1.42655	0.232329	0.354455
FBgn0004598	-0.162127	8.2738	15.4061	8.67064e-05	0.000354817
FBgn0004606	0.0169354	6.28851	0.0656145	0.797832	0.86711
FBgn0004607	-0.0210969	5.05684	0.0262923	0.871189	0.91818
FBgn0004611	-0.0783706	6.94059	2.50351	0.113593	0.201238
FBgn0004618	-0.206909	3.13717	2.45821	0.116912	0.206237
FBgn0004619	0.0981683	2.39044	0.389784	0.532413	0.658432
FBgn0004620	-0.146625	3.01454	1.12429	0.288997	0.420987
FBgn0004622	-0.0664379	2.35536	0.228834	0.63239	0.741171
FBgn0004623	0.230767	7.19464	12.7621	0.000353722	0.00127451
FBgn0004629	0.193697	8.05597	1.66941	0.196338	0.310913
FBgn0004635	-0.0362498	3.97242	0.10453	0.74646	0.830307
FBgn0004636	-0.089887	7.64436	2.6775	0.101775	0.184032
FBgn0004638	-0.0437641	6.98267	0.940815	0.332068	0.467874
FBgn0004643	0.397147	6.24267	47.8373	4.63101e-12	7.27499e-11
FBgn0004644	0.208202	2.59758	2.2965	0.129666	0.224015
FBgn0004646	-0.333014	6.94711	30.6652	3.06611e-08	2.40034e-07
FBgn0004647	-0.163957	6.51821	5.59992	0.0179613	0.0419718
FBgn0004648	-0.103415	8.04067	6.04537	0.0139428	0.0336799
FBgn0004649	0.227895	9.9825	1.46772	0.225705	0.346524
FBgn0004650	-0.0464429	6.87069	0.672416	0.412211	0.547511
FBgn0004652	-0.329465	5.64382	24.3113	8.19578e-07	5.02643e-06
FBgn0004654	-0.0665983	7.91231	0.675982	0.410974	0.546328
FBgn0004655	0.0905406	7.82504	3.73495	0.0532852	0.107491
FBgn0004656	0.0701916	8.48148	0.986796	0.320527	0.456353
FBgn0004666	-0.0759766	4.21803	0.975808	0.323236	0.458641
FBgn0004687	-0.0258017	7.40677	0.37026	0.542862	0.667403
FBgn0004698	0.0317401	7.28304	0.491316	0.483341	0.613716
FBgn0004784	0.228573	6.57725	9.13481	0.00250791	0.00740011
FBgn0004795	-0.226372	7.65596	18.6344	1.58337e-05	7.47951e-05
FBgn0004797	-0.379203	5.14786	16.0245	6.25289e-05	0.000261769
FBgn0004811	0.36108	6.29664	37.5916	8.72179e-10	9.09393e-09
FBgn0004832	0.500774	3.92763	49.0761	2.46224e-12	4.02166e-11
FBgn0004837	0.0623824	5.31804	1.02401	0.31157	0.446172
FBgn0004838	-0.0248757	10.1391	0.165436	0.6842	0.782972
FBgn0004839	0.0348608	2.24089	0.0701225	0.791159	0.86198
FBgn0004852	-0.169115	6.22397	7.65251	0.00566934	0.0154066
FBgn0004854	-0.185747	1.45331	0.645438	0.421748	0.557049
FBgn0004855	0.108225	3.963	2.66504	0.102575	0.185125
FBgn0004856	0.469903	6.4142	91.0223	1.42064e-21	1.25561e-19
FBgn0004858	0.157142	5.03856	4.91185	0.0266731	0.0592548
FBgn0004859	-0.455186	5.20388	26.3423	2.85959e-07	1.91524e-06
FBgn0004860	0.0121511	5.03827	0.0265646	0.870529	0.91769
FBgn0004862	0.518072	-0.0720853	2.59647	0.107102	0.191903
FBgn0004864	-0.00812241	6.68779	0.0335942	0.854573	0.905472
FBgn0004865	-0.266701	3.61424	6.98459	0.00822146	0.0213073
FBgn0004867	0.255728	10.1008	23.3705	1.3361e-06	7.83354e-06
FBgn0004868	0.0246234	8.5553	0.377047	0.539188	0.664637
FBgn0004870	0.20599	0.176976	0.46079	0.497255	0.626125
FBgn0004872	-0.0587899	6.46812	1.76574	0.18391	0.29589
FBgn0004875	0.0763548	8.22683	1.94265	0.163381	0.269555
FBgn0004880	-0.215923	5.30891	2.89348	0.0889387	0.164791
FBgn0004882	-0.111231	9.03167	5.46384	0.019414	0.0448894
FBgn0004885	0.130211	6.26198	3.95273	0.0467955	0.0962263
FBgn0004888	-0.193176	8.19363	11.1049	0.000861019	0.00284422
FBgn0004889	-0.0201873	8.21467	0.208156	0.648217	0.752945
FBgn0004892	0.481826	1.96902	7.78018	0.00528226	0.0144669
FBgn0004893	0.0346445	5.03961	0.322819	0.569918	0.688812
FBgn0004901	0.446689	5.18039	65.0613	7.26057e-16	2.21494e-14
FBgn0004903	-0.0673347	6.2945	2.04503	0.152704	0.25537
FBgn0004907	-0.262555	8.5985	65.699	5.25327e-16	1.62886e-14
FBgn0004908	-0.0914122	3.21503	1.58152	0.208542	0.325604
FBgn0004910	0.0349329	6.26816	0.187381	0.665105	0.767435
FBgn0004913	0.148172	6.80381	3.40955	0.0648201	0.126601
FBgn0004914	-0.219414	7.29209	36.6106	1.44248e-09	1.45122e-08
FBgn0004915	0.0252318	5.64606	0.266982	0.605363	0.719293
FBgn0004919	-0.370098	6.40301	20.9331	4.75607e-06	2.50575e-05
FBgn0004921	-0.138206	5.17746	4.7424	0.029428	0.0646008
FBgn0004924	-0.0180557	7.72659	0.198864	0.65564	0.759665
FBgn0004926	-0.179454	7.69067	21.5771	3.3988e-06	1.84727e-05
FBgn0004956	-0.326473	4.56792	2.75064	0.0972155	0.177113
FBgn0004957	0.503729	3.67956	4.39251	0.0360971	0.0769892
FBgn0004959	0.0936328	0.637182	0.237011	0.626373	0.736493
FBgn0005198	-0.00227862	6.70255	0.00245365	0.960493	0.975456
FBgn0005278	-0.133023	8.73821	7.31548	0.00683631	0.0181248
FBgn0005322	0.32812	5.90411	49.7277	1.76637e-12	2.96706e-11
FBgn0005355	0.471548	5.06141	59.6763	1.11813e-14	2.75368e-13
FBgn0005386	0.0367837	6.79929	0.348169	0.555151	0.677341
FBgn0005391	-0.276891	11.3944	0.980167	0.322158	0.457867
FBgn0005410	0.0253162	7.68743	0.194904	0.658866	0.761816
FBgn0005411	0.455044	6.55802	110.586	7.29159e-26	1.14928e-23
FBgn0005427	-0.264483	6.6268	33.8235	6.03456e-09	5.39403e-08
FBgn0005533	0.149841	9.47982	8.71102	0.00316293	0.00912224
FBgn0005536	-0.0969567	8.32213	3.88834	0.0486224	0.0993564
FBgn0005558	0.115867	3.18037	0.624785	0.429275	0.564075
FBgn0005561	-0.0122795	3.10948	0.00763281	0.930381	0.957203
FBgn0005564	0.332948	3.7929	13.2813	0.000268072	0.000992234
FBgn0005585	0.00572063	9.09455	0.00921135	0.92354	0.954005
FBgn0005586	-0.155867	6.17001	5.49253	0.0190979	0.0442669
FBgn0005592	-0.249619	2.96166	3.17985	0.0745517	0.142633
FBgn0005593	0.196633	10.1896	17.5775	2.75837e-05	0.000124159
FBgn0005596	-0.261074	6.84433	18.9969	1.3093e-05	6.3013e-05
FBgn0005612	-0.25049	5.86693	11.749	0.000608756	0.0020821
FBgn0005613	-0.0731757	2.2211	0.0599747	0.806536	0.872402
FBgn0005614	0.452354	8.60616	43.6919	3.84358e-11	5.08374e-10
FBgn0005616	-0.406043	4.19842	25.5586	4.29138e-07	2.774e-06
FBgn0005617	0.0317273	7.07962	0.331936	0.564521	0.685148
FBgn0005619	0.437414	3.6819	13.8586	0.000197088	0.000749443
FBgn0005624	-0.030545	4.54328	0.187087	0.665352	0.767533
FBgn0005626	0.153599	5.82488	2.16286	0.141382	0.240087
FBgn0005630	0.0384147	9.51816	0.512803	0.473928	0.604932
FBgn0005631	-0.0393365	5.032	0.260135	0.610028	0.722846
FBgn0005632	-0.0156038	8.82971	0.0594762	0.807326	0.872757
FBgn0005633	-0.484949	7.28944	8.09879	0.00442947	0.0123787
FBgn0005636	-0.173514	3.90144	1.58387	0.208204	0.325291
FBgn0005638	0.714326	2.95164	15.0636	0.000103947	0.000418842
FBgn0005640	0.0394632	6.8545	0.840975	0.359118	0.493703
FBgn0005642	0.194929	6.26654	12.6465	0.000376271	0.00134482
FBgn0005648	-0.0210377	6.41028	0.138483	0.709794	0.803318
FBgn0005649	0.0479943	8.11633	1.39729	0.237178	0.360147
FBgn0005654	-0.134854	6.59378	5.19691	0.0226271	0.0512906
FBgn0005655	0.266258	6.74345	23.5905	1.19174e-06	7.07486e-06
FBgn0005658	0.0261053	1.238	0.0135769	0.90724	0.942832
FBgn0005659	0.225156	5.26287	10.8073	0.00101102	0.00329584
FBgn0005660	0.205843	1.16237	0.963885	0.32621	0.461891
FBgn0005664	0.542496	1.42513	2.87405	0.0900183	0.166238
FBgn0005666	-0.172006	10.4865	1.11354	0.291314	0.423644
FBgn0005670	0.00842102	3.18473	0.00475377	0.945031	0.963887
FBgn0005671	-0.202326	9.89327	41.9077	9.56851e-11	1.19222e-09
FBgn0005672	-0.0139727	6.14988	0.0765431	0.782038	0.855097
FBgn0005674	-0.102066	7.51575	5.08269	0.0241658	0.0543229
FBgn0005677	0.125051	2.96506	1.19862	0.273597	0.403841
FBgn0005683	-0.0362411	5.03973	0.214746	0.643073	0.749598
FBgn0005694	0.0309334	7.23522	0.556351	0.455734	0.587818
FBgn0005695	-0.318264	7.01377	59.3373	1.32837e-14	3.19654e-13
FBgn0005696	0.513774	5.69813	52.1131	5.23934e-13	9.58383e-12
FBgn0005771	0.178579	5.43966	8.36722	0.00382049	0.0108343
FBgn0005775	0.197899	4.42744	4.6227	0.0315515	0.0687625
FBgn0005777	0.0170989	6.72084	0.159111	0.689976	0.787036
FBgn0008635	0.118229	7.3875	4.65872	0.0308962	0.067573
FBgn0008636	1.03734	0.375994	9.65897	0.00188429	0.00577063
FBgn0008646	-0.0350233	1.0943	0.0258544	0.872256	0.918896
FBgn0008651	-0.155721	1.29327	0.440732	0.506769	0.635276
FBgn0008654	-0.168923	4.62174	3.57782	0.0585559	0.116288
FBgn0010015	-0.00946912	4.22591	0.00959875	0.921954	0.95294
FBgn0010019	0.0562752	13.4753	0.744511	0.38822	0.523605
FBgn0010039	0.130176	5.72123	1.94664	0.16295	0.269126
FBgn0010040	-0.787286	0.848597	11.1259	0.000851286	0.00281687
FBgn0010041	0.651147	3.18281	3.03399	0.0815371	0.153513
FBgn0010043	-0.242775	1.35842	0.802368	0.370386	0.505811
FBgn0010051	-0.0351882	7.30871	0.30298	0.58202	0.699235
FBgn0010052	0.775125	2.45221	11.9759	0.000538941	0.00186353
FBgn0010053	-0.246089	6.92398	7.02383	0.00804322	0.0208797
FBgn0010078	0.220434	9.49181	9.20087	0.002419	0.00717026
FBgn0010105	0.303455	3.27747	5.82527	0.0157975	0.0374992
FBgn0010113	0.111389	5.84036	2.30445	0.129004	0.223234
FBgn0010114	0.253171	6.73475	19.1012	1.23969e-05	6.00601e-05
FBgn0010173	0.0271963	7.6054	0.380405	0.537387	0.663195
FBgn0010194	0.0728326	3.94774	0.76932	0.380427	0.51601
FBgn0010213	-0.111467	7.31721	1.92656	0.165136	0.27174
FBgn0010215	-0.0841596	7.27812	1.69934	0.192374	0.305865
FBgn0010217	-0.523914	11.4948	64.9246	7.7818e-16	2.33627e-14
FBgn0010220	-0.0715192	4.56423	1.71221	0.190699	0.303968
FBgn0010222	-0.0380201	4.72614	0.0555576	0.81366	0.877199
FBgn0010223	-0.229191	4.32528	5.7486	0.0165018	0.0389172
FBgn0010225	0.536428	9.31119	49.131	2.39429e-12	3.91743e-11
FBgn0010226	0.109615	8.84082	1.94098	0.163562	0.269666
FBgn0010228	0.217183	6.90225	10.5891	0.00113754	0.0036591
FBgn0010235	0.0182938	6.7905	0.238046	0.625621	0.736014
FBgn0010238	0.206917	6.89501	18.5075	1.69233e-05	7.93866e-05
FBgn0010240	-0.314072	3.27736	9.02712	0.00266004	0.00779063
FBgn0010241	-0.00959268	6.69971	0.00555588	0.940583	0.961917
FBgn0010246	0.0728678	7.32946	1.13963	0.285731	0.41743
FBgn0010263	-0.0501986	8.49306	0.442748	0.505799	0.634227
FBgn0010265	-0.0452881	9.58799	0.931245	0.334539	0.47056
FBgn0010269	0.365418	5.90549	47.5797	5.28125e-12	8.13433e-11
FBgn0010278	-0.113094	6.83267	5.30255	0.0212942	0.0487365
FBgn0010280	0.012168	7.94425	0.0885754	0.765996	0.843899
FBgn0010282	-0.157028	6.3886	8.5255	0.00350204	0.0100208
FBgn0010287	0.470055	3.31724	26.7607	2.30274e-07	1.57121e-06
FBgn0010288	0.136392	7.44223	9.52923	0.00202225	0.0061375
FBgn0010292	-0.0705367	5.01704	1.48331	0.223257	0.343684
FBgn0010300	-0.10292	7.58695	1.94629	0.162988	0.269141
FBgn0010303	0.00669912	6.91929	0.0173631	0.895167	0.934568
FBgn0010309	0.307742	4.67462	9.33709	0.00224562	0.0067333
FBgn0010313	0.0138997	7.40908	0.0505047	0.822187	0.883672
FBgn0010314	-0.0326106	5.5711	0.300675	0.583459	0.700284
FBgn0010315	-0.219494	6.21939	18.0897	2.10741e-05	9.69349e-05
FBgn0010316	0.0653756	5.65168	1.33104	0.24862	0.373859
FBgn0010317	0.088074	5.06222	1.50283	0.220237	0.340046
FBgn0010328	0.0930276	8.41126	3.33037	0.0680116	0.132044
FBgn0010333	-0.081092	6.89913	4.91829	0.0265738	0.0590618
FBgn0010339	0.224252	5.84873	17.8857	2.34583e-05	0.000107068
FBgn0010340	0.0646924	4.10305	0.965213	0.325877	0.461557
FBgn0010341	-0.0239792	7.71874	0.321918	0.570457	0.689345
FBgn0010342	0.175962	6.52454	7.63022	0.00573984	0.0155937
FBgn0010348	-0.0527781	9.00917	1.08781	0.296957	0.430328
FBgn0010350	-0.420842	7.57891	124.488	6.58655e-29	1.68349e-26
FBgn0010352	0.0612719	10.6422	1.40631	0.235669	0.358373
FBgn0010355	0.00426087	7.23568	0.00737793	0.93155	0.957677
FBgn0010356	0.206075	4.78535	12.6014	0.000385452	0.00137296
FBgn0010379	0.00115441	7.28269	0.000622467	0.980095	0.986773
FBgn0010380	0.231559	7.09495	42.7332	6.27376e-11	8.00688e-10
FBgn0010381	0.168174	5.47409	0.262327	0.608526	0.72168
FBgn0010383	0.10481	4.78962	1.52193	0.217328	0.336433
FBgn0010385	-0.754982	2.46714	1.94764	0.162841	0.268993
FBgn0010387	-0.220528	8.27823	4.9273	0.0264357	0.0587963
FBgn0010389	-0.118507	4.1231	1.58583	0.207923	0.325012
FBgn0010391	0.184459	6.73933	18.2542	1.93295e-05	8.97088e-05
FBgn0010395	-0.103176	4.16656	1.04399	0.306896	0.44088
FBgn0010397	0.270425	5.94541	18.9878	1.3156e-05	6.32198e-05
FBgn0010398	0.593052	4.24204	55.9143	7.56984e-14	1.59795e-12
FBgn0010399	-0.0658766	3.55214	0.37624	0.539622	0.665
FBgn0010401	0.504867	3.7527	8.05412	0.00454003	0.0126428
FBgn0010403	0.0482851	3.3624	0.0785242	0.779307	0.85328
FBgn0010406	-0.330232	5.88018	41.7569	1.03358e-10	1.28443e-09
FBgn0010407	0.148808	1.37465	0.424272	0.514813	0.643142
FBgn0010408	0.357074	9.72062	38.0477	6.90371e-10	7.32754e-09
FBgn0010409	-0.0215281	10.1142	0.209173	0.647416	0.752441
FBgn0010411	0.30161	9.64366	31.9568	1.5764e-08	1.29974e-07
FBgn0010412	0.32584	9.80555	48.3922	3.48951e-12	5.5556e-11
FBgn0010414	0.00648568	2.04567	0.00155963	0.968498	0.980055
FBgn0010415	-0.157504	8.14403	6.10265	0.0134979	0.0327727
FBgn0010416	0.209188	5.48404	17.0696	3.60345e-05	0.000158134
FBgn0010417	0.236306	5.44644	13.5245	0.000235467	0.000883305
FBgn0010421	-0.473591	5.30655	71.9946	2.15789e-17	8.91141e-16
FBgn0010422	0.294395	5.79996	27.4225	1.63515e-07	1.14291e-06
FBgn0010423	-0.563271	4.3917	22.3831	2.23329e-06	1.24824e-05
FBgn0010424	-0.225362	4.35085	5.86348	0.0154582	0.0367953
FBgn0010425	0.0556572	8.7502	0.131185	0.717206	0.808685
FBgn0010434	-0.0412911	7.97465	0.613417	0.433504	0.567425
FBgn0010435	-0.074838	9.04344	2.24869	0.133728	0.229439
FBgn0010438	0.0853616	5.26321	1.76157	0.184428	0.296421
FBgn0010441	0.395096	4.9142	25.5155	4.38844e-07	2.83287e-06
FBgn0010452	-0.349773	2.7842	7.13492	0.00755969	0.019782
FBgn0010453	-0.167819	2.04906	1.18046	0.277262	0.408358
FBgn0010470	-0.173139	6.93278	7.28615	0.00694882	0.018387
FBgn0010473	-0.12034	6.5684	1.35803	0.243879	0.368605
FBgn0010482	-0.4131	8.48627	23.1581	1.49215e-06	8.65191e-06
FBgn0010488	-0.00457753	10.0442	0.0108347	0.917098	0.949321
FBgn0010501	0.207668	5.53499	17.559	2.78525e-05	0.00012525
FBgn0010504	0.365495	6.7125	41.5756	1.13398e-10	1.40001e-09
FBgn0010516	-0.179044	7.46681	12.272	0.000459814	0.00161353
FBgn0010520	-0.115192	3.97385	2.25148	0.133486	0.229245
FBgn0010531	-0.020312	3.81358	0.057405	0.810646	0.875146
FBgn0010548	-0.0058513	8.60668	0.0122502	0.91187	0.945668
FBgn0010551	0.172459	7.90068	15.6665	7.55511e-05	0.000312412
FBgn0010575	0.0624811	8.22779	1.12475	0.288898	0.420908
FBgn0010583	-0.0208776	6.55416	0.239431	0.624617	0.735525
FBgn0010590	0.235765	6.77927	13.8063	0.000202657	0.000769071
FBgn0010591	0.0126888	6.33001	0.0559526	0.813011	0.87663
FBgn0010602	0.103031	5.94498	2.28775	0.130399	0.225116
FBgn0010607	0.0362433	4.07643	0.259448	0.610499	0.723223
FBgn0010611	0.406632	5.97766	49.3438	2.14817e-12	3.56407e-11
FBgn0010612	-0.33773	8.53356	18.1618	2.02911e-05	9.37436e-05
FBgn0010620	-0.0388156	5.65906	0.621106	0.430637	0.56536
FBgn0010621	0.421049	7.67785	82.3531	1.13825e-19	6.85635e-18
FBgn0010622	0.271739	4.45587	18.5017	1.69755e-05	7.95527e-05
FBgn0010638	0.107508	6.71105	2.45565	0.117103	0.206481
FBgn0010651	0.695703	6.90684	60.2063	8.54172e-15	2.16566e-13
FBgn0010660	0.0239041	7.47395	0.226428	0.634185	0.742539
FBgn0010704	-0.0518626	7.58691	1.85422	0.173294	0.282169
FBgn0010741	0.433621	6.01735	74.0486	7.62168e-18	3.4653e-16
FBgn0010747	-0.0231447	7.12858	0.294517	0.58734	0.703098
FBgn0010750	0.485883	5.06084	51.5107	7.12094e-13	1.27785e-11
FBgn0010762	0.165309	7.0189	12.0921	0.000506353	0.00175792
FBgn0010768	-0.106616	3.96144	2.50327	0.11361	0.201238
FBgn0010770	-0.246474	5.39958	24.6093	7.02135e-07	4.35702e-06
FBgn0010772	-0.0022454	7.10067	0.00392457	0.950048	0.967835
FBgn0010774	0.47449	7.64079	69.3342	8.31149e-17	3.04658e-15
FBgn0010786	0.0882292	7.48874	2.38563	0.122455	0.213822
FBgn0010803	0.288331	5.81699	34.2217	4.91767e-09	4.53279e-08
FBgn0010808	-0.0767308	6.36824	1.64208	0.20004	0.31535
FBgn0010812	0.0111709	5.20622	0.0310485	0.860132	0.910211
FBgn0010825	0.0760075	8.41498	1.23675	0.266098	0.395054
FBgn0010830	0.326839	5.92794	18.5274	1.67477e-05	7.86409e-05
FBgn0010877	-0.102842	7.31468	7.50391	0.00615651	0.0165733
FBgn0010894	0.077555	3.55526	0.606534	0.436096	0.569714
FBgn0010905	0.0289074	8.01811	0.270001	0.603331	0.717563
FBgn0010909	0.0188353	8.19637	0.178466	0.672695	0.773739
FBgn0010926	0.00361854	5.80108	0.00562323	0.940224	0.961889
FBgn0011016	0.147802	6.71577	6.01904	0.0141523	0.0341164
FBgn0011020	-0.0204818	5.52551	0.0985327	0.753598	0.835397
FBgn0011202	-0.0505355	6.75572	1.07513	0.29979	0.433372
FBgn0011204	-0.0451258	7.89457	1.16543	0.280342	0.411713
FBgn0011205	0.152336	7.91867	8.91568	0.00282733	0.00823217
FBgn0011206	-0.328473	8.77346	11.2683	0.000788403	0.00263554
FBgn0011207	-0.321102	5.90507	62.6676	2.44703e-15	6.82643e-14
FBgn0011211	-0.298623	11.2328	14.5864	0.000133875	0.000524898
FBgn0011224	-0.0499069	7.96999	0.704934	0.401131	0.536307
FBgn0011225	-0.0500482	8.73795	1.85007	0.173775	0.28271
FBgn0011227	1.09863	7.42515	141.825	1.06196e-32	3.86269e-30
FBgn0011230	-0.148717	9.62024	2.64962	0.103575	0.186644
FBgn0011232	-0.0046003	6.16107	0.00989156	0.920776	0.952086
FBgn0011236	0.131754	6.11119	7.19674	0.00730362	0.0191915
FBgn0011241	-0.23003	4.6052	18.959	1.3356e-05	6.41154e-05
FBgn0011259	-0.00284933	5.60752	0.000903799	0.976017	0.984659
FBgn0011260	-0.0190929	6.90317	0.136914	0.711369	0.804234
FBgn0011272	0.490984	9.95143	78.2154	9.23932e-19	4.82742e-17
FBgn0011274	-0.0745379	6.63924	1.69725	0.192648	0.306197
FBgn0011279	0.596507	2.2088	7.24168	0.00712303	0.0187848
FBgn0011280	0.329383	7.30561	17.4299	2.98098e-05	0.000133228
FBgn0011281	0.460382	4.55138	7.09631	0.00772427	0.0201513
FBgn0011282	0.67576	1.73875	7.09092	0.00774756	0.0202009
FBgn0011283	0.242266	2.82188	1.61955	0.203155	0.319178
FBgn0011284	-0.15675	10.5352	10.5586	0.00115649	0.0037175
FBgn0011286	-0.0312534	8.39672	0.0964636	0.756115	0.836815
FBgn0011289	0.27698	6.86211	30.4593	3.40941e-08	2.65373e-07
FBgn0011290	-0.372831	5.4542	47.6289	5.15048e-12	7.95883e-11
FBgn0011291	0.341572	3.79754	25.6816	4.02653e-07	2.61531e-06
FBgn0011293	0.626256	3.88002	13.2244	0.000276324	0.00101998
FBgn0011294	0.345571	2.47394	3.22633	0.0724627	0.139341
FBgn0011296	0.117872	6.47745	1.17202	0.278986	0.410386
FBgn0011297	0.281875	4.98505	22.5295	2.0694e-06	1.16559e-05
FBgn0011300	-0.0260588	6.59468	0.230369	0.631251	0.740295
FBgn0011305	0.196879	5.36705	15.6784	7.50766e-05	0.000310586
FBgn0011327	-0.119883	6.42058	5.36321	0.0205658	0.0471951
FBgn0011335	-0.315684	4.64303	20.4237	6.2058e-06	3.19305e-05
FBgn0011336	-0.535895	7.34555	74.4288	6.28639e-18	2.91424e-16
FBgn0011361	-0.250123	7.49969	13.5277	0.000235068	0.000882157
FBgn0011455	0.538643	7.61763	66.5648	3.38573e-16	1.08908e-14
FBgn0011474	0.0367064	7.08293	0.405909	0.524053	0.651335
FBgn0011476	0.136451	3.44423	2.313	0.128296	0.22246
FBgn0011481	0.149176	6.13349	2.44144	0.118168	0.207892
FBgn0011509	-0.016946	5.2461	0.156308	0.692579	0.789217
FBgn0011554	0.592474	3.81907	27.5669	1.51754e-07	1.06861e-06
FBgn0011555	-0.202105	6.84782	2.386	0.122426	0.213811
FBgn0011556	-0.13956	4.41907	1.29277	0.255539	0.382136
FBgn0011566	0.323357	4.60135	23.5134	1.24045e-06	7.32266e-06
FBgn0011570	0.0414878	5.67779	0.877467	0.348896	0.48508
FBgn0011571	0.0346953	6.51912	0.252076	0.615617	0.727827
FBgn0011573	0.019494	6.1824	0.13893	0.709347	0.803004
FBgn0011576	-0.312289	5.38834	15.9105	6.64098e-05	0.000277279
FBgn0011581	0.29104	4.53506	8.8855	0.00287444	0.00834877
FBgn0011584	-0.138853	7.44862	13.0543	0.000302588	0.00110699
FBgn0011586	-0.0717772	5.05576	1.39401	0.237729	0.360694
FBgn0011589	-0.0919149	2.38262	0.40007	0.527053	0.654113
FBgn0011591	-0.0761623	4.12802	0.918337	0.337912	0.474061
FBgn0011592	-0.0596844	5.36053	0.823207	0.364244	0.499443
FBgn0011604	0.0595184	7.03708	1.2172	0.269911	0.399459
FBgn0011606	-0.143723	7.37638	5.98621	0.0144182	0.0346512
FBgn0011638	0.346349	6.76452	48.4276	3.42709e-12	5.47466e-11
FBgn0011640	0.0120309	7.19513	0.0903415	0.763743	0.842344
FBgn0011642	-0.360832	6.61088	28.4225	9.75253e-08	7.10005e-07
FBgn0011648	0.311387	7.22251	32.9342	9.533e-09	8.15132e-08
FBgn0011655	0.340547	6.01695	32.1335	1.43937e-08	1.19195e-07
FBgn0011656	-0.0859311	7.20935	3.74761	0.0528832	0.106794
FBgn0011659	0.43897	3.94512	13.8714	0.000195758	0.000744984
FBgn0011660	0.0956178	5.58556	2.42503	0.119411	0.209745
FBgn0011661	-0.0945748	8.89974	5.8029	0.0159998	0.0379033
FBgn0011666	-0.0349508	6.74191	0.228444	0.63268	0.741419
FBgn0011672	-0.0676068	6.84176	1.95663	0.161874	0.26777
FBgn0011674	0.230517	4.93103	10.27	0.0013521	0.00429376
FBgn0011676	0.162698	2.97058	1.80723	0.17884	0.289357
FBgn0011692	-0.198613	6.20607	10.313	0.00132096	0.00420193
FBgn0011693	0.292696	7.7206	16.6181	4.57138e-05	0.000196596
FBgn0011695	0.38278	9.55646	21.2673	3.99498e-06	2.14175e-05
FBgn0011701	0.41913	4.03425	15.7645	7.17343e-05	0.000297932
FBgn0011703	0.0694379	6.8116	0.347291	0.55565	0.677775
FBgn0011704	0.32838	7.39342	20.0651	7.48502e-06	3.78534e-05
FBgn0011705	-0.0339388	5.4914	0.419653	0.51711	0.6455
FBgn0011706	-0.0864301	0.324259	0.0919551	0.761706	0.841329
FBgn0011708	0.144161	6.93554	12.7778	0.000350753	0.00126557
FBgn0011710	0.0840553	6.53932	3.97299	0.0462357	0.0951993
FBgn0011715	0.295556	5.67718	24.9517	5.87858e-07	3.70378e-06
FBgn0011722	0.0595901	6.20526	0.296644	0.585994	0.702095
FBgn0011723	0.57017	2.90322	16.4353	5.03401e-05	0.000214929
FBgn0011725	-0.211819	9.03274	21.1369	4.27605e-06	2.27695e-05
FBgn0011726	-0.394273	8.07831	68.2025	1.47542e-16	5.111e-15
FBgn0011737	0.0674055	6.37591	1.83652	0.17536	0.284749
FBgn0011739	0.0558824	6.97269	1.04937	0.305652	0.439427
FBgn0011740	-0.0879246	6.43731	2.83491	0.0922358	0.16967
FBgn0011741	0.101417	4.7695	3.30446	0.069092	0.133648
FBgn0011742	-0.544841	7.3765	286.853	2.41083e-64	2.27992e-60
FBgn0011745	0.277684	6.25745	46.3118	1.00853e-11	1.4833e-10
FBgn0011746	-0.104043	5.16152	1.2394	0.265586	0.394541
FBgn0011747	-0.184112	8.44339	8.07125	0.0044973	0.0125386
FBgn0011754	-0.162796	6.98007	22.7292	1.8651e-06	1.05808e-05
FBgn0011758	0.119069	0.466077	0.215511	0.642482	0.749207
FBgn0011761	0.594583	10.1268	35.2166	2.95004e-09	2.81235e-08
FBgn0011762	0.61094	3.91015	67.848	1.76597e-16	6.00749e-15
FBgn0011763	0.00987363	7.48039	0.05922	0.807733	0.873098
FBgn0011764	-0.0411542	6.86858	0.570037	0.450244	0.583176
FBgn0011766	-0.245299	7.71643	19.2595	1.14103e-05	5.56224e-05
FBgn0011768	0.308944	6.99227	22.4506	2.15622e-06	1.21017e-05
FBgn0011769	0.109341	3.69809	2.25184	0.133456	0.229245
FBgn0011770	-0.188482	6.55624	4.52916	0.033322	0.0719302
FBgn0011771	-0.0447299	5.7865	0.66429	0.41505	0.550117
FBgn0011774	-0.513617	5.14507	67.2617	2.37755e-16	7.8617e-15
FBgn0011785	0.00227218	7.31811	0.00217475	0.962805	0.976193
FBgn0011787	0.494259	5.54926	33.314	7.84177e-09	6.82869e-08
FBgn0011802	0.0178413	5.72618	0.0785412	0.779284	0.85328
FBgn0011818	0.351797	5.49051	29.2284	6.43304e-08	4.85146e-07
FBgn0011822	0.0135754	4.05002	0.00785096	0.929395	0.95671
FBgn0011823	0.286634	10.5242	30.7029	3.00722e-08	2.35815e-07
FBgn0011824	0.0426649	5.58829	0.477264	0.489664	0.619665
FBgn0011826	0.696642	1.85083	34.736	3.77578e-09	3.53891e-08
FBgn0011828	-0.110596	6.84727	1.74211	0.186871	0.299228
FBgn0011829	-0.15824	1.09354	0.547323	0.459414	0.591665
FBgn0011834	0.0689608	4.32792	0.326064	0.567986	0.687677
FBgn0011836	-0.05055	5.63289	0.912032	0.339576	0.475406
FBgn0011837	0.0462507	6.31378	0.598554	0.43913	0.572571
FBgn0012034	0.0936565	9.0104	0.865812	0.352117	0.48751
FBgn0012036	-0.100644	8.91065	3.01459	0.0825185	0.154986
FBgn0012037	0.0403286	7.69849	0.330023	0.565645	0.68617
FBgn0012051	-0.218154	5.64736	17.1421	3.4684e-05	0.00015306
FBgn0012058	0.13324	7.30938	6.91384	0.00855312	0.0220701
FBgn0012344	0.479562	3.3214	16.692	4.3967e-05	0.000189688
FBgn0013263	-0.170589	6.87211	12.9045	0.000327799	0.00119185
FBgn0013269	0.116421	7.7254	6.39602	0.0114376	0.0283379
FBgn0013272	-0.231507	9.63523	18.9535	1.3394e-05	6.42655e-05
FBgn0013303	0.0126921	5.87254	0.0502	0.822716	0.884009
FBgn0013305	-0.0842398	7.05219	3.85084	0.049721	0.101273
FBgn0013307	0.48874	6.17445	16.1518	5.8462e-05	0.000245831
FBgn0013308	0.36405	-0.0389544	1.67248	0.195927	0.310417
FBgn0013325	0.435342	9.89684	51.6143	6.75494e-13	1.21679e-11
FBgn0013334	0.146256	7.9873	5.74403	0.0165448	0.038999
FBgn0013342	-0.0642989	7.93469	1.12594	0.288643	0.420666
FBgn0013343	-0.111848	6.85973	1.71726	0.190047	0.303286
FBgn0013347	0.0277843	6.06918	0.365538	0.545447	0.669212
FBgn0013432	-0.257213	5.15427	29.0463	7.06706e-08	5.30422e-07
FBgn0013433	0.16173	1.48813	0.564652	0.452392	0.584943
FBgn0013435	-0.451857	3.51737	33.0961	8.77142e-09	7.57546e-08
FBgn0013467	0.0520253	6.35974	0.616843	0.432223	0.56644
FBgn0013469	-0.178788	2.67979	1.7857	0.181451	0.29263
FBgn0013531	0.325118	3.7622	19.4237	1.04699e-05	5.14359e-05
FBgn0013548	0.362196	5.92213	26.4019	2.77266e-07	1.86494e-06
FBgn0013563	-0.137441	5.00741	8.50174	0.00354807	0.0101378
FBgn0013576	-0.066694	9.07125	2.39209	0.12195	0.213176
FBgn0013717	-0.0494929	5.59289	0.912832	0.339364	0.475251
FBgn0013718	-0.27134	7.16136	49.152	2.36881e-12	3.88247e-11
FBgn0013720	-0.0513303	5.33968	0.965467	0.325813	0.461536
FBgn0013725	-0.0110052	2.55788	0.00634039	0.936534	0.959859
FBgn0013726	0.270609	7.39342	38.9787	4.28446e-10	4.70594e-09
FBgn0013732	0.0175263	6.16869	0.0914523	0.762339	0.841536
FBgn0013733	-0.163287	10.0914	2.35968	0.124508	0.216965
FBgn0013746	-0.022735	5.76688	0.240257	0.62402	0.735217
FBgn0013749	0.109449	6.52275	3.37669	0.0661249	0.128963
FBgn0013750	-0.217076	6.8964	20.63	5.57174e-06	2.89139e-05
FBgn0013751	0.456304	0.223717	2.84366	0.0917348	0.168814
FBgn0013753	0.338489	4.54565	25.9425	3.51736e-07	2.30677e-06
FBgn0013756	0.0125046	7.70621	0.0407879	0.839948	0.894818
FBgn0013759	-0.0287588	7.64682	0.470326	0.492837	0.622133
FBgn0013762	0.184695	5.10725	13.118	0.000292467	0.00107495
FBgn0013763	-0.106258	8.5046	5.68631	0.0170977	0.0401295
FBgn0013764	0.508248	5.67737	61.0996	5.4259e-15	1.4214e-13
FBgn0013765	0.0345718	8.10932	0.527589	0.467622	0.599878
FBgn0013767	1.20237	0.630294	13.228	0.000275805	0.00101846
FBgn0013770	0.137407	9.40535	7.3269	0.00679302	0.0180302
FBgn0013771	0.209047	5.57224	3.90841	0.0480451	0.0983682
FBgn0013772	-0.260695	6.08333	1.05633	0.304053	0.437956
FBgn0013773	0.19417	4.91215	4.2785	0.0385974	0.0815131
FBgn0013799	0.00263014	6.38405	0.00319831	0.954901	0.971531
FBgn0013809	0.704237	6.21424	5.13882	0.0233965	0.0528069
FBgn0013810	-0.329363	6.79314	8.89102	0.00286577	0.00832613
FBgn0013811	-0.720197	5.22821	15.7106	7.38085e-05	0.000305741
FBgn0013812	0.217912	3.50958	2.33094	0.126825	0.220394
FBgn0013813	-0.184717	6.38439	2.09121	0.148148	0.249206
FBgn0013949	0.120248	4.89736	0.735429	0.391129	0.52631
FBgn0013953	-0.122891	4.3698	3.11025	0.0778009	0.147625
FBgn0013954	0.426203	7.85743	32.2147	1.38042e-08	1.14538e-07
FBgn0013972	0.268847	4.66189	9.53088	0.00202044	0.00613395
FBgn0013973	0.17972	4.21748	3.94256	0.047079	0.0966622
FBgn0013983	-0.143979	4.04822	3.1181	0.077427	0.147088
FBgn0013984	0.030204	6.38375	0.0902714	0.763832	0.842344
FBgn0013987	-0.0842278	7.17199	3.62517	0.0569117	0.113499
FBgn0013995	-0.10497	8.12767	7.06065	0.00787954	0.0204829
FBgn0013997	-0.13202	6.5814	7.88342	0.004989	0.0137514
FBgn0013998	0.13405	5.99732	10.1937	0.00140918	0.00446004
FBgn0014000	0.359714	5.42427	19.3648	1.07978e-05	5.28819e-05
FBgn0014001	0.0710784	6.87116	2.97977	0.0843114	0.157732
FBgn0014002	-0.0844172	9.38262	2.16727	0.140976	0.23945
FBgn0014006	0.0143293	6.78555	0.102338	0.749041	0.832037
FBgn0014007	-0.000614915	6.58222	0.000100705	0.991993	0.994623
FBgn0014009	-0.0173931	7.05412	0.224539	0.635603	0.743647
FBgn0014010	-0.0931334	8.15426	5.58068	0.0181597	0.0423831
FBgn0014011	-0.0986838	6.24166	2.95871	0.0854159	0.159514
FBgn0014018	-0.130626	7.30963	2.31957	0.127755	0.221644
FBgn0014019	0.282817	5.26838	11.3577	0.000751352	0.00252059
FBgn0014020	-0.233241	8.63831	21.0324	4.51581e-06	2.38848e-05
FBgn0014022	0.117448	4.586	3.55433	0.0593903	0.117624
FBgn0014023	0.361512	4.98553	29.2041	6.51422e-08	4.90877e-07
FBgn0014026	0.357623	10.7961	39.3205	3.59644e-10	3.99666e-09
FBgn0014028	0.548862	8.64943	71.6565	2.56115e-17	1.044e-15
FBgn0014029	0.393728	6.11122	58.4987	2.03424e-14	4.70363e-13
FBgn0014031	0.232222	5.86597	6.71192	0.00957704	0.0243468
FBgn0014032	0.0568876	4.76867	0.918325	0.337915	0.474061
FBgn0014033	-0.180564	4.2488	2.22723	0.135597	0.232055
FBgn0014037	0.0303241	7.57566	0.314767	0.57477	0.692697
FBgn0014073	-0.143511	5.2063	4.3594	0.0368052	0.0783313
FBgn0014075	-0.0686991	7.38376	2.616	0.105791	0.190155
FBgn0014092	0.179067	4.40078	8.42534	0.00370027	0.010537
FBgn0014127	0.0230048	5.42586	0.195159	0.658657	0.761668
FBgn0014133	-0.0256214	8.7801	0.312774	0.575983	0.693541
FBgn0014135	-0.266024	3.35127	5.09171	0.0240405	0.0540539
FBgn0014141	-0.134792	8.36644	7.23556	0.00714734	0.0188332
FBgn0014163	-0.0574002	8.24205	1.00601	0.315861	0.451496
FBgn0014184	-0.184695	10.9249	13.2767	0.000268723	0.000993865
FBgn0014189	-0.59524	7.48175	216.345	5.6705e-49	7.66084e-46
FBgn0014269	0.208334	5.22555	9.34311	0.00223826	0.00671548
FBgn0014340	-0.182888	5.35112	12.2765	0.000458703	0.00161083
FBgn0014342	0.248397	2.91243	3.91814	0.0477678	0.0978639
FBgn0014343	-0.282202	4.00982	10.6145	0.00112203	0.00361041
FBgn0014366	0.0660953	5.2814	1.60322	0.205447	0.321675
FBgn0014380	0.443696	4.89654	36.3467	1.65162e-09	1.64588e-08
FBgn0014388	0.182518	4.55141	3.53143	0.060216	0.118958
FBgn0014391	-0.342816	8.23286	18.1377	2.05498e-05	9.47995e-05
FBgn0014396	-0.856748	8.85005	41.1397	1.41731e-10	1.72282e-09
FBgn0014411	-0.0142539	6.96539	0.181179	0.670362	0.771806
FBgn0014417	0.148285	5.47354	2.77222	0.0959133	0.175344
FBgn0014427	0.194008	6.50924	3.7284	0.0534947	0.107776
FBgn0014454	-2.61035	2.26373	50.434	1.23243e-12	2.13074e-11
FBgn0014455	0.598152	7.62681	74.1012	7.42146e-18	3.39057e-16
FBgn0014467	0.0296208	6.76722	0.556757	0.45557	0.587738
FBgn0014469	-1.084	6.98964	85.7529	2.03882e-20	1.41773e-18
FBgn0014859	-0.178147	2.93086	1.72199	0.189438	0.302467
FBgn0014861	-0.115522	6.68673	2.52992	0.111706	0.198917
FBgn0014863	0.08957	8.06804	1.69491	0.192955	0.306427
FBgn0014865	-0.192095	3.43867	0.0576308	0.81028	0.875005
FBgn0014868	0.30965	6.66719	21.0791	4.40718e-06	2.33697e-05
FBgn0014869	-0.151507	8.67257	4.54837	0.03295	0.0712899
FBgn0014870	-0.0116897	6.76174	0.064746	0.799146	0.867484
FBgn0014877	0.116326	6.73317	4.51653	0.0335689	0.0722982
FBgn0014879	-0.0206292	6.87758	0.216436	0.641769	0.748638
FBgn0014903	0.106052	4.55404	1.00728	0.315556	0.451196
FBgn0014906	-0.194181	7.36834	19.032	1.28544e-05	6.19908e-05
FBgn0014930	-0.176605	4.59647	7.24025	0.00712871	0.0187946
FBgn0014931	-0.148891	2.46896	3.07253	0.0796254	0.150513
FBgn0015000	0.12828	5.75911	5.95632	0.0146646	0.0351467
FBgn0015001	0.185829	3.65384	1.97216	0.160218	0.265729
FBgn0015010	0.493489	7.49222	27.4396	1.62076e-07	1.13454e-06
FBgn0015011	0.229422	4.68225	5.77203	0.0162832	0.0385027
FBgn0015019	0.474578	7.74225	112.451	2.8456e-26	5.27663e-24
FBgn0015024	-0.156374	8.35085	9.74409	0.001799	0.00554293
FBgn0015025	0.195405	3.07389	3.98292	0.0459637	0.0947838
FBgn0015031	0.163304	7.27503	2.59979	0.106878	0.191574
FBgn0015032	-1.6861	1.57098	69.87	6.3345e-17	2.3678e-15
FBgn0015033	-0.0923716	3.93052	0.430793	0.5116	0.640195
FBgn0015034	0.250946	4.54303	1.62961	0.201757	0.317578
FBgn0015035	-0.566485	4.8747	6.73092	0.00947556	0.0241082
FBgn0015036	0.126254	3.45005	1.4937	0.221643	0.341826
FBgn0015037	-0.179288	6.88451	4.33087	0.0374271	0.0794854
FBgn0015038	0.406059	3.10035	4.63419	0.0313409	0.0684347
FBgn0015039	0.283895	7.77859	4.50567	0.0337826	0.0727252
FBgn0015040	0.872138	4.81092	32.4324	1.23413e-08	1.03744e-07
FBgn0015075	0.203791	5.18029	10.037	0.00153429	0.00481733
FBgn0015129	0.309768	1.56808	2.22823	0.135509	0.231947
FBgn0015218	-0.0612266	9.00603	2.28378	0.130733	0.225522
FBgn0015221	0.0891269	9.83787	4.53219	0.0332631	0.0718242
FBgn0015222	0.280536	9.63089	45.8584	1.27118e-11	1.84097e-10
FBgn0015229	-0.0883482	6.77525	1.53201	0.215811	0.334523
FBgn0015239	0.183775	5.65941	12.7267	0.000360477	0.00129473
FBgn0015240	0.237099	5.81466	25.498	4.42844e-07	2.85674e-06
FBgn0015245	0.293482	8.76788	26.2264	3.0364e-07	2.01652e-06
FBgn0015247	0.124393	6.70428	10.4789	0.00120746	0.00386822
FBgn0015268	0.0600931	9.71528	1.65171	0.198726	0.313853
FBgn0015269	-0.157785	7.09154	3.24178	0.0717827	0.138287
FBgn0015270	0.0478573	4.8644	0.336316	0.561964	0.682896
FBgn0015271	-0.236972	4.01819	6.16544	0.013027	0.0317353
FBgn0015277	0.269779	5.12717	23.8461	1.04356e-06	6.25407e-06
FBgn0015278	-0.0409063	7.42821	0.928923	0.335143	0.470972
FBgn0015279	-0.0639096	6.91672	1.47564	0.224458	0.345081
FBgn0015282	0.263883	7.4208	33.3654	7.63711e-09	6.68742e-08
FBgn0015283	0.0456409	7.56911	1.01156	0.31453	0.449865
FBgn0015286	-0.0964349	7.13283	2.50879	0.113213	0.20083
FBgn0015288	-0.0875325	9.88738	3.68613	0.0548669	0.110095
FBgn0015295	0.2722	5.39915	22.4117	2.20031e-06	1.2323e-05
FBgn0015296	0.329993	5.36153	41.2969	1.30776e-10	1.59786e-09
FBgn0015299	0.27613	4.91726	16.103	5.99874e-05	0.00025191
FBgn0015320	0.323442	7.30073	33.9412	5.68033e-09	5.14056e-08
FBgn0015321	0.294745	7.4067	34.6393	3.96805e-09	3.70078e-08
FBgn0015323	0.173385	3.72453	1.60593	0.205065	0.321182
FBgn0015324	-0.398754	9.86965	80.1711	3.43357e-19	1.88787e-17
FBgn0015331	-0.376868	5.12161	23.9599	9.83611e-07	5.9324e-06
FBgn0015336	0.127249	3.7194	0.791957	0.373509	0.509487
FBgn0015338	0.453526	5.51174	62.2545	3.01822e-15	8.27342e-14
FBgn0015359	0.1574	5.80634	7.60483	0.00582122	0.0157781
FBgn0015360	0.0563815	6.19492	1.88339	0.169949	0.277967
FBgn0015371	-0.0729994	6.97137	1.3319	0.248467	0.373748
FBgn0015372	-0.139453	5.6109	8.10816	0.00440664	0.0123258
FBgn0015374	-0.0630989	6.32834	1.97467	0.159953	0.265428
FBgn0015376	0.141707	4.87764	3.58148	0.0584271	0.116056
FBgn0015379	0.488759	4.99719	58.4928	2.04037e-14	4.70628e-13
FBgn0015380	-0.0346782	3.04772	0.105034	0.745871	0.829944
FBgn0015391	0.140585	6.6678	4.34842	0.0370432	0.0787585
FBgn0015393	0.494199	5.89353	21.1836	4.17324e-06	2.22596e-05
FBgn0015396	-0.507909	6.53337	77.8147	1.13175e-18	5.78538e-17
FBgn0015399	-0.252731	4.54589	11.9003	0.000561262	0.00193364
FBgn0015400	0.689465	2.28952	14.7086	0.000125473	0.000494132
FBgn0015402	-0.168303	5.72269	10.3223	0.00131433	0.00418223
FBgn0015477	-0.0011795	7.15198	0.000711414	0.978721	0.986187
FBgn0015509	0.312444	8.21602	44.445	2.61607e-11	3.60644e-10
FBgn0015513	-0.0755151	7.53792	1.83237	0.175847	0.285296
FBgn0015519	-0.153603	1.67813	0.866679	0.351876	0.487309
FBgn0015520	0.40146	3.88334	3.05069	0.0807027	0.152276
FBgn0015521	0.48414	8.72515	71.4999	2.77265e-17	1.12536e-15
FBgn0015522	0.156378	6.58142	4.6095	0.0317953	0.0691555
FBgn0015524	-0.663494	1.97656	20.0703	7.46487e-06	3.77717e-05
FBgn0015527	0.580821	6.64127	111.39	4.86129e-26	8.06547e-24
FBgn0015541	-0.181448	6.55477	6.32284	0.0119193	0.0293543
FBgn0015542	-0.0992083	8.46534	3.28289	0.0700055	0.135166
FBgn0015544	-0.470585	5.71162	91.5503	1.08789e-21	9.70585e-20
FBgn0015546	-0.407284	4.83725	49.1726	2.34397e-12	3.84843e-11
FBgn0015553	0.119462	5.83357	3.17502	0.0747721	0.142852
FBgn0015558	0.400241	4.07206	9.35712	0.00222121	0.00667373
FBgn0015561	0.355476	1.87067	3.55837	0.059246	0.117387
FBgn0015565	-0.485494	7.57447	51.486	7.21089e-13	1.29154e-11
FBgn0015568	0.220251	5.27838	6.10602	0.0134722	0.0327271
FBgn0015569	-0.362208	6.6978	23.2279	1.43898e-06	8.37957e-06
FBgn0015570	-0.000882101	5.02484	7.93171e-05	0.992894	0.995209
FBgn0015571	-0.168855	6.98891	9.21887	0.00239533	0.00711273
FBgn0015572	0.318332	1.88342	2.74922	0.0973017	0.177197
FBgn0015575	-0.260537	7.29715	18.9138	1.36762e-05	6.54865e-05
FBgn0015576	0.110608	6.27355	1.61524	0.203757	0.319796
FBgn0015577	0.264445	5.65798	18.9977	1.30877e-05	6.3013e-05
FBgn0015582	-0.202778	5.03585	3.73126	0.0534029	0.107637
FBgn0015589	-0.0529011	6.94609	0.914935	0.338808	0.474613
FBgn0015591	0.314489	4.12172	11.1735	0.000829735	0.00275423
FBgn0015600	-0.0166602	8.57564	0.0980285	0.754208	0.835487
FBgn0015602	0.274199	5.80274	18.2591	1.92801e-05	8.95541e-05
FBgn0015609	-0.233944	5.49882	3.96857	0.0463572	0.0953665
FBgn0015615	-0.409465	6.46994	78.2652	9.00958e-19	4.73354e-17
FBgn0015618	-0.159354	3.55842	3.58458	0.0583181	0.115864
FBgn0015622	0.02917	8.47113	0.501803	0.478709	0.609307
FBgn0015623	0.0767548	10.4998	3.18326	0.0743962	0.142427
FBgn0015625	0.0510955	7.80145	0.605488	0.436492	0.570152
FBgn0015663	-0.2078	4.17113	2.81173	0.0935774	0.171671
FBgn0015664	-0.301389	6.10049	32.6648	1.09502e-08	9.27088e-08
FBgn0015714	-0.0384956	5.01354	0.104623	0.746351	0.830284
FBgn0015721	0.0491698	2.28008	0.0380528	0.845337	0.89847
FBgn0015737	-0.246893	7.84825	17.3811	3.05848e-05	0.000136498
FBgn0015754	0.0292117	7.85298	0.468942	0.493474	0.622653
FBgn0015756	0.290486	9.72956	33.2991	7.90203e-09	6.86852e-08
FBgn0015765	-0.0145823	4.28416	0.0418723	0.837863	0.893816
FBgn0015766	0.00944296	10.5148	0.0407089	0.840101	0.894818
FBgn0015772	-0.0442439	7.0584	0.977883	0.322722	0.45848
FBgn0015773	0.333769	4.70562	19.597	9.56198e-06	4.75185e-05
FBgn0015776	-0.357466	8.76268	86.2716	1.56841e-20	1.11522e-18
FBgn0015777	-0.0192623	8.59338	0.127989	0.720526	0.811083
FBgn0015778	-0.0402826	9.69148	0.407701	0.523139	0.650536
FBgn0015781	-0.0657218	4.804	1.16457	0.28052	0.411874
FBgn0015789	-0.119837	7.81736	11.2523	0.000795245	0.00265653
FBgn0015790	-0.0346143	8.22655	0.826323	0.363338	0.49848
FBgn0015791	-0.123366	6.59569	9.90935	0.00164441	0.00511216
FBgn0015793	-0.023332	4.86835	0.158996	0.690082	0.787036
FBgn0015794	0.0278159	5.52644	0.195735	0.658185	0.761653
FBgn0015795	-0.239324	8.16847	33.3326	7.76688e-09	6.78221e-08
FBgn0015797	-0.129244	6.64062	9.39292	0.00217825	0.00656878
FBgn0015799	0.0578334	6.98832	0.941229	0.331962	0.467794
FBgn0015801	-0.115548	5.24637	2.89173	0.0890353	0.164905
FBgn0015803	0.0424274	6.41395	0.877861	0.348788	0.485001
FBgn0015805	0.241605	7.23344	20.4181	6.22382e-06	3.20058e-05
FBgn0015806	-0.0422947	7.63872	0.617402	0.432014	0.566259
FBgn0015818	0.336624	4.96554	22.5154	2.08461e-06	1.17276e-05
FBgn0015828	0.459	5.73928	72.6508	1.54746e-17	6.62189e-16
FBgn0015829	0.0544924	4.81399	0.820707	0.364973	0.499935
FBgn0015834	0.290583	7.57057	32.5241	1.17721e-08	9.91352e-08
FBgn0015838	-0.102668	5.05514	2.77465	0.0957675	0.175111
FBgn0015872	0.0894982	6.57337	1.64238	0.199999	0.315346
FBgn0015903	0.0823416	6.67223	3.43118	0.0639763	0.125264
FBgn0015904	0.387331	2.32385	6.84705	0.00887877	0.0228046
FBgn0015905	0.0406512	5.07649	0.396238	0.529039	0.655523
FBgn0015907	-0.0112626	6.98316	0.0569094	0.811449	0.875613
FBgn0015919	0.412125	3.19316	10.942	0.000940063	0.00308593
FBgn0015924	-0.0794188	7.45435	2.6107	0.106145	0.190635
FBgn0015925	-0.00689132	5.34908	0.0100729	0.920056	0.951549
FBgn0015929	-0.537376	6.72353	72.5988	1.58872e-17	6.76781e-16
FBgn0015949	-0.12565	6.9412	9.03693	0.0026458	0.00775856
FBgn0016013	0.0878479	4.52991	0.769965	0.380228	0.515908
FBgn0016031	-0.0475463	7.53154	0.905678	0.341264	0.477401
FBgn0016032	-0.181986	3.05146	2.88486	0.0894156	0.165283
FBgn0016034	-0.0047126	5.89412	0.00492002	0.94408	0.96354
FBgn0016038	0.396803	5.58447	64.2989	1.06904e-15	3.15933e-14
FBgn0016041	0.0863508	7.25506	3.92028	0.0477069	0.0978028
FBgn0016047	0.901934	0.995774	14.4553	0.000143529	0.000560196
FBgn0016054	0.0941887	1.98434	0.369544	0.543253	0.667647
FBgn0016059	0.00348559	7.889	0.0058827	0.938863	0.960908
FBgn0016061	-0.0727274	4.49911	0.582965	0.445153	0.578429
FBgn0016070	0.0246924	10.0696	0.16399	0.68551	0.783712
FBgn0016075	-0.134653	8.01781	2.44889	0.117608	0.207195
FBgn0016076	0.0753578	8.07286	0.332528	0.564174	0.684815
FBgn0016078	-0.108653	5.72943	3.84782	0.0498107	0.101434
FBgn0016081	-0.179694	7.99906	9.2959	0.00229667	0.00686676
FBgn0016119	0.0583786	8.67067	0.74817	0.387056	0.522984
FBgn0016120	-0.0294423	8.62431	0.124943	0.723734	0.813659
FBgn0016122	-0.127339	7.84779	3.76102	0.0524605	0.106144
FBgn0016123	0.19553	8.31574	4.29789	0.0381597	0.080769
FBgn0016126	0.368994	7.98809	43.84	3.56349e-11	4.78587e-10
FBgn0016131	0.198275	5.72518	18.017	2.18943e-05	0.000100512
FBgn0016641	0.0349072	6.75675	0.471333	0.492375	0.621764
FBgn0016650	-0.29444	4.15184	9.86912	0.00168076	0.00521317
FBgn0016660	-0.146469	1.12279	0.822512	0.364447	0.499648
FBgn0016672	0.00153521	5.97568	0.000707456	0.97878	0.986187
FBgn0016675	-1.18417	5.51652	45.8407	1.28272e-11	1.85485e-10
FBgn0016684	-0.191902	5.57988	3.02547	0.0819666	0.154168
FBgn0016685	-0.0166284	7.4227	0.105632	0.745172	0.829558
FBgn0016687	0.0131844	7.87935	0.0637213	0.800708	0.868582
FBgn0016691	0.78892	8.86785	82.528	1.04184e-19	6.3158e-18
FBgn0016693	0.0199272	7.88687	0.352779	0.552544	0.675379
FBgn0016694	-0.588775	9.23139	37.127	1.10678e-09	1.1377e-08
FBgn0016696	-0.000984548	7.10853	0.000708235	0.978769	0.986187
FBgn0016697	0.384641	7.00125	59.4652	1.24477e-14	3.01068e-13
FBgn0016698	0.310258	4.57569	24.2957	8.26227e-07	5.06392e-06
FBgn0016700	-0.123081	8.15049	7.69361	0.00554168	0.01509
FBgn0016701	0.00603238	5.72965	0.0192099	0.889766	0.930398
FBgn0016715	-0.190472	4.02399	3.01811	0.0823392	0.154684
FBgn0016726	0.214362	8.75433	12.6135	0.000382969	0.00136515
FBgn0016754	-0.0175091	6.24206	0.0983906	0.75377	0.835465
FBgn0016756	-0.0429933	8.63703	1.07183	0.300533	0.434046
FBgn0016762	0.402745	3.53178	28.2685	1.05601e-07	7.62926e-07
FBgn0016792	0.0648422	6.82414	0.771974	0.379607	0.515352
FBgn0016794	0.354194	6.43171	30.4201	3.47908e-08	2.70129e-07
FBgn0016797	0.178373	4.34815	3.41286	0.0646903	0.126426
FBgn0016917	-0.0735954	8.70447	1.65743	0.19795	0.312941
FBgn0016920	-0.259821	1.8888	2.4077	0.12074	0.211451
FBgn0016926	-0.100594	8.27347	2.67527	0.101918	0.184185
FBgn0016930	-0.138942	6.64684	7.91938	0.00489079	0.0135152
FBgn0016970	0.67008	3.26139	44.2556	2.88173e-11	3.93254e-10
FBgn0016975	-0.0719762	6.86534	0.683549	0.408367	0.543934
FBgn0016976	0.20172	5.30762	2.60332	0.10664	0.191292
FBgn0016977	-0.130652	8.69438	0.695677	0.40424	0.539599
FBgn0016978	0.530496	5.58452	72.8713	1.38389e-17	6.00342e-16
FBgn0016983	-0.00697827	7.19099	0.02832	0.866359	0.914721
FBgn0016984	0.115611	6.86129	9.22473	0.00238768	0.00709849
FBgn0017414	-0.196707	4.07757	8.1613	0.00427936	0.0120053
FBgn0017418	-0.403871	7.90169	49.2716	2.22867e-12	3.67827e-11
FBgn0017429	0.435514	5.31116	45.0681	1.90302e-11	2.67016e-10
FBgn0017430	-0.486092	4.7928	48.5197	3.26989e-12	5.26803e-11
FBgn0017448	0.104849	5.05986	1.32408	0.249862	0.37513
FBgn0017457	0.605563	5.68607	74.3756	6.45831e-18	2.97933e-16
FBgn0017482	0.257238	4.06012	9.14957	0.00248777	0.00734753
FBgn0017545	0.0954572	10.7958	2.58072	0.108173	0.193565
FBgn0017549	-0.286826	6.32191	36.8665	1.265e-09	1.28085e-08
FBgn0017550	0.0238664	7.31349	0.380071	0.537565	0.663329
FBgn0017551	0.23712	5.68214	14.8354	0.000117313	0.000466343
FBgn0017558	-0.432439	7.63162	64.4049	1.01306e-15	3.00329e-14
FBgn0017561	0.127861	6.14831	2.95576	0.0855718	0.159742
FBgn0017566	-0.254828	9.35733	19.5043	1.00376e-05	4.96211e-05
FBgn0017567	0.510479	7.93738	70.2221	5.29899e-17	2.02885e-15
FBgn0017572	-0.113681	6.62592	9.8049	0.00174047	0.00538073
FBgn0017577	-0.0801366	6.7671	1.71308	0.190586	0.303942
FBgn0017578	0.0621171	5.05899	1.54337	0.214117	0.332715
FBgn0017579	0.118128	9.67682	6.00366	0.0142762	0.0343714
FBgn0017581	-0.0233801	10.4762	0.135318	0.71298	0.805382
FBgn0017590	0.247382	4.41562	9.13233	0.00251131	0.00740423
FBgn0019624	-0.33271	9.23321	19.4786	1.01731e-05	5.02389e-05
FBgn0019637	0.174334	5.90859	9.30467	0.00228571	0.00683832
FBgn0019643	0.0993248	7.96318	1.84855	0.173952	0.28287
FBgn0019644	-0.461149	9.12917	31.492	2.00262e-08	1.61593e-07
FBgn0019650	-0.00403952	4.23395	0.00149676	0.969139	0.98044
FBgn0019662	-0.0680704	6.01232	3.55797	0.0592602	0.117391
FBgn0019686	0.0773375	7.52378	1.43398	0.231117	0.352926
FBgn0019830	-0.0785638	7.08775	2.21202	0.136939	0.234013
FBgn0019886	-0.0666953	8.21387	2.81283	0.093513	0.171619
FBgn0019890	-0.237395	7.8445	38.5714	5.27881e-10	5.72496e-09
FBgn0019925	-0.0744944	7.20245	3.50462	0.061198	0.120648
FBgn0019928	0.622465	5.07734	10.167	0.00142979	0.0045177
FBgn0019929	0.364239	5.42006	22.484	2.11907e-06	1.19144e-05
FBgn0019932	-0.0708612	6.09512	1.02012	0.312489	0.44742
FBgn0019936	-0.0821213	9.71411	2.35032	0.125257	0.21815
FBgn0019938	-0.0731663	6.1661	2.12208	0.145189	0.245133
FBgn0019940	0.308818	6.21554	20.1007	7.34709e-06	3.72481e-05
FBgn0019947	0.297695	6.08773	48.2137	3.82208e-12	6.03429e-11
FBgn0019948	0.0932659	6.49418	3.62243	0.0570055	0.113591
FBgn0019949	-0.339291	4.40985	34.7734	3.70397e-09	3.4785e-08
FBgn0019952	0.347677	4.82981	13.5281	0.000235016	0.000882157
FBgn0019957	0.334882	8.19706	24.2537	8.44434e-07	5.1588e-06
FBgn0019960	-0.19603	8.53399	31.2767	2.23749e-08	1.7921e-07
FBgn0019968	-0.174673	7.38868	11.6884	0.000628918	0.00214485
FBgn0019972	0.24482	5.53218	21.0236	4.53664e-06	2.39815e-05
FBgn0019982	-0.164425	5.91189	5.99576	0.0143403	0.0344993
FBgn0019985	-0.393976	3.06085	6.80005	0.00911553	0.023343
FBgn0019990	0.0275503	6.42421	0.348804	0.554791	0.677251
FBgn0020018	0.314989	5.49677	22.5674	2.029e-06	1.14762e-05
FBgn0020224	-0.58477	7.50054	162.547	3.14204e-37	2.28571e-34
FBgn0020235	-0.479606	8.72315	24.8685	6.13786e-07	3.84154e-06
FBgn0020236	-0.282898	9.5232	14.2909	0.000156618	0.000605038
FBgn0020238	-0.278593	9.52261	54.3347	1.69094e-13	3.35949e-12
FBgn0020245	-0.0603181	5.89785	1.62418	0.202509	0.318446
FBgn0020248	0.489399	4.70382	27.895	1.28078e-07	9.14827e-07
FBgn0020249	0.12011	5.99685	7.32762	0.00679028	0.018028
FBgn0020251	-0.128037	5.71412	5.88109	0.0153043	0.0364751
FBgn0020255	0.295205	8.89216	34.9381	3.40351e-09	3.22515e-08
FBgn0020257	-0.261429	5.65691	20.122	7.26577e-06	3.69422e-05
FBgn0020258	-0.9178	1.20157	24.5176	7.36331e-07	4.55129e-06
FBgn0020261	0.0849222	7.12316	2.95422	0.0856535	0.159825
FBgn0020269	0.263695	4.49522	7.73262	0.0054232	0.014793
FBgn0020270	0.438905	4.99306	47.966	4.33684e-12	6.82421e-11
FBgn0020272	0.549377	4.26184	49.8114	1.69259e-12	2.86191e-11
FBgn0020277	0.0409372	1.02218	0.0186425	0.891396	0.931587
FBgn0020278	-0.0987529	5.92789	3.89786	0.0483476	0.0988592
FBgn0020279	0.108519	9.1727	5.48367	0.0191949	0.0444591
FBgn0020294	0.0557988	5.09741	0.482902	0.487111	0.61759
FBgn0020299	0.116214	5.44175	2.85141	0.0912937	0.168199
FBgn0020300	0.544542	5.95556	17.5312	2.82626e-05	0.000126877
FBgn0020304	-0.078577	7.76969	3.10436	0.0780827	0.1481
FBgn0020305	0.610706	4.40114	81.3788	1.86345e-19	1.06161e-17
FBgn0020306	-0.000180714	9.32763	9.47486e-06	0.997544	0.998494
FBgn0020307	0.188224	4.65175	4.52648	0.0333742	0.0720265
FBgn0020309	0.0118018	7.38551	0.0327126	0.856473	0.907017
FBgn0020312	-0.0608977	5.31396	0.683556	0.408365	0.543934
FBgn0020369	0.170623	7.31882	12.2683	0.00046071	0.00161548
FBgn0020370	-0.0220894	7.52121	0.289584	0.590487	0.705793
FBgn0020372	0.160749	5.74352	4.52273	0.0334475	0.0721517
FBgn0020378	0.151231	3.5138	1.94778	0.162826	0.268993
FBgn0020379	0.0206542	5.28659	0.158932	0.690141	0.787036
FBgn0020381	0.143623	4.58816	4.90577	0.0267671	0.0594282
FBgn0020385	0.0550749	7.20725	0.222088	0.637454	0.745075
FBgn0020386	0.00282133	8.49006	0.00382439	0.950689	0.9683
FBgn0020388	0.352668	5.59554	34.7979	3.65771e-09	3.44189e-08
FBgn0020389	0.292807	5.18049	16.2358	5.5926e-05	0.000236444
FBgn0020391	0.112239	1.83222	0.674209	0.411588	0.546837
FBgn0020392	-0.47027	6.67852	117.849	1.87075e-27	3.93149e-25
FBgn0020407	-0.151526	6.15192	6.91503	0.00854744	0.0220675
FBgn0020412	0.0307168	7.12591	0.399802	0.527192	0.654199
FBgn0020414	0.562694	7.40469	52.247	4.89414e-13	9.0222e-12
FBgn0020415	-0.189898	6.98792	9.44649	0.00211554	0.00640008
FBgn0020416	0.540834	5.50817	29.4167	5.8371e-08	4.41259e-07
FBgn0020439	0.0699651	9.08965	2.2091	0.137199	0.234288
FBgn0020440	0.0018549	6.18565	0.00132181	0.970998	0.98169
FBgn0020443	-0.0210675	8.3565	0.343724	0.557687	0.67932
FBgn0020445	-0.00452859	6.19583	0.00810422	0.928269	0.956174
FBgn0020493	-0.0548085	6.164	0.611951	0.434054	0.56791
FBgn0020496	-0.346564	8.53754	54.4478	1.59633e-13	3.18491e-12
FBgn0020497	-0.0768071	8.02494	2.58681	0.107757	0.192967
FBgn0020503	-0.390685	9.29024	57.7832	2.92653e-14	6.62111e-13
FBgn0020506	0.180546	3.66078	0.258311	0.611283	0.723699
FBgn0020508	-0.416863	4.8827	5.48583	0.0191712	0.0444151
FBgn0020510	0.00701328	6.37358	0.0252985	0.873626	0.919621
FBgn0020521	-0.149375	6.46864	5.07238	0.0243099	0.0545819
FBgn0020545	-0.0313783	6.54206	0.0464692	0.829325	0.889037
FBgn0020616	0.00883171	5.74181	0.0248077	0.874847	0.920497
FBgn0020617	0.234116	1.64244	0.549979	0.458326	0.590717
FBgn0020618	0.281846	10.3286	17.1301	3.49054e-05	0.000153908
FBgn0020620	-0.0294989	6.69922	0.530226	0.466512	0.598617
FBgn0020621	-0.107206	7.69974	5.05999	0.0244844	0.0549216
FBgn0020622	-0.00647011	7.2497	0.0145451	0.904006	0.940846
FBgn0020626	0.0572769	6.93953	1.91283	0.166649	0.273802
FBgn0020633	0.025538	6.49251	0.236866	0.626479	0.736526
FBgn0020647	-0.124825	7.86048	9.11038	0.00254163	0.00748324
FBgn0020653	0.214744	8.63259	22.3707	2.24777e-06	1.25559e-05
FBgn0020655	0.341236	6.02643	41.3482	1.27387e-10	1.56413e-09
FBgn0020660	-0.0869593	7.70592	2.76422	0.0963939	0.17595
FBgn0020762	0.0761985	4.43461	0.85822	0.354237	0.48934
FBgn0020764	0.392127	8.01025	28.8125	7.97342e-08	5.90021e-07
FBgn0020766	-0.133265	5.46795	4.3012	0.0380855	0.0806481
FBgn0020880	0.137982	0.288256	0.494948	0.481728	0.61211
FBgn0020887	-0.0449637	6.65827	0.703308	0.401674	0.53691
FBgn0020906	-0.166375	9.86354	1.15	0.283549	0.414872
FBgn0020907	-0.312121	6.50951	16.3225	5.34268e-05	0.000226878
FBgn0020909	0.511552	4.06976	61.3545	4.76688e-15	1.27707e-13
FBgn0020910	-0.126785	10.7223	6.26685	0.0123017	0.0301549
FBgn0020912	0.542112	5.03302	40.5735	1.89357e-10	2.2273e-09
FBgn0020930	0.0818332	5.64723	3.11437	0.0776044	0.147282
FBgn0021750	0.42532	3.78417	24.7777	6.4338e-07	4.01348e-06
FBgn0021760	-0.00606118	8.32085	0.0119385	0.912993	0.94633
FBgn0021761	0.00188704	6.43597	0.00116622	0.972758	0.982629
FBgn0021764	-0.00627937	6.98425	0.0097094	0.921506	0.952737
FBgn0021765	0.298295	6.69335	13.0025	0.000311082	0.00113631
FBgn0021767	0.222316	2.20902	2.71882	0.0991712	0.180139
FBgn0021768	0.248169	6.37181	31.0991	2.45184e-08	1.95013e-07
FBgn0021776	0.459131	2.75876	7.40282	0.00651216	0.0173872
FBgn0021795	0.0398985	6.58546	0.30783	0.579015	0.69666
FBgn0021796	-0.044082	6.61525	0.683731	0.408305	0.543934
FBgn0021800	-0.139849	6.64051	7.93744	0.00484222	0.0133976
FBgn0021814	0.297459	4.64776	19.7125	9.00118e-06	4.49679e-05
FBgn0021818	-0.0368049	6.63436	0.690712	0.405922	0.541593
FBgn0021825	0.150717	5.79695	12.1477	0.000491479	0.00171072
FBgn0021847	0.0575794	5.78719	1.53294	0.215672	0.334443
FBgn0021872	-0.117445	8.72073	9.30252	0.00228839	0.00684418
FBgn0021873	0.0209695	7.39101	0.137403	0.710876	0.803869
FBgn0021874	0.514032	4.27204	45.7405	1.35003e-11	1.94327e-10
FBgn0021875	0.499719	3.74702	39.1618	3.90092e-10	4.30467e-09
FBgn0021895	-0.125552	6.6001	6.81605	0.00903424	0.0231536
FBgn0021906	0.794026	9.14627	116.616	3.48447e-27	7.16361e-25
FBgn0021944	0.287871	5.81234	28.8025	8.01456e-08	5.92601e-07
FBgn0021953	-0.0421155	7.76058	0.516336	0.472409	0.603889
FBgn0021967	-0.381828	7.40953	37.1242	1.10839e-09	1.13812e-08
FBgn0021979	-0.13604	7.87762	9.66259	0.00188059	0.00576116
FBgn0021995	0.49456	5.85757	68.3051	1.40056e-16	4.90559e-15
FBgn0022023	-0.0807611	8.03704	2.54816	0.110423	0.197032
FBgn0022027	0.503758	3.98408	35.8251	2.15846e-09	2.11529e-08
FBgn0022029	-0.00868293	5.89567	0.0292522	0.864198	0.913357
FBgn0022069	0.0596982	6.95475	1.88683	0.16956	0.277475
FBgn0022153	-0.00232764	6.81889	0.00309667	0.955622	0.972069
FBgn0022160	0.199257	8.94542	4.24115	0.0394553	0.0831208
FBgn0022213	0.0423349	7.28504	0.905151	0.341404	0.477401
FBgn0022224	0.318959	2.59178	8.02371	0.00461688	0.0128342
FBgn0022238	-0.0904704	7.48965	2.52985	0.111711	0.198917
FBgn0022246	-0.350408	3.0121	17.1052	3.53645e-05	0.000155627
FBgn0022288	0.517767	5.74273	81.8407	1.47506e-19	8.55806e-18
FBgn0022338	0.384826	6.35564	31.0952	2.4568e-08	1.95243e-07
FBgn0022343	0.443623	6.68823	83.0621	7.95159e-20	5.00002e-18
FBgn0022344	-0.21719	5.57549	12.2443	0.000466686	0.00163461
FBgn0022349	-0.0717893	7.19648	5.11174	0.0237645	0.0534842
FBgn0022355	-0.660935	10.0649	8.42556	0.00369983	0.010537
FBgn0022359	0.177023	5.09139	1.99006	0.158335	0.263251
FBgn0022361	-0.313819	7.31726	19.8626	8.32133e-06	4.17479e-05
FBgn0022382	-0.255165	7.84202	18.4935	1.70482e-05	7.98143e-05
FBgn0022699	0.118229	5.25813	4.60109	0.0319517	0.0694636
FBgn0022700	-0.336569	2.84704	3.37825	0.066062	0.128867
FBgn0022702	0.674789	2.99716	23.2705	1.40742e-06	8.21098e-06
FBgn0022708	0.166687	6.76529	13.6973	0.000214764	0.000811112
FBgn0022709	0.0481045	7.56473	0.631532	0.426794	0.562144
FBgn0022710	-0.132205	6.11196	3.37084	0.0663598	0.129341
FBgn0022720	0.00764885	6.41749	0.0335206	0.85473	0.905473
FBgn0022724	0.156835	4.63642	5.27643	0.021616	0.0493656
FBgn0022764	0.0721892	8.68035	1.54073	0.214509	0.332995
FBgn0022768	0.0664056	7.78352	1.71062	0.190905	0.304245
FBgn0022770	-0.0437652	2.62045	0.0948742	0.75807	0.838487
FBgn0022772	0.320373	6.44832	18.0971	2.09926e-05	9.66068e-05
FBgn0022774	-0.218839	4.45467	1.62106	0.202944	0.319024
FBgn0022786	0.381754	5.43641	34.2171	4.92949e-09	4.53926e-08
FBgn0022787	-0.00929981	6.73661	0.0381634	0.845115	0.89841
FBgn0022800	-0.140649	3.58728	1.87059	0.171407	0.279869
FBgn0022893	0.300726	9.27642	25.0097	5.70419e-07	3.6011e-06
FBgn0022935	-0.0512275	5.67567	1.21458	0.270428	0.400099
FBgn0022936	0.332745	4.82639	29.5343	5.49371e-08	4.16632e-07
FBgn0022942	-0.0714486	6.19196	2.60239	0.106703	0.191369
FBgn0022943	0.249131	4.20012	14.1004	0.000173308	0.000665439
FBgn0022959	-0.175813	9.22458	13.9926	0.000183536	0.000702145
FBgn0022960	-0.186916	6.18124	11.2034	0.000816478	0.00271866
FBgn0022981	0.334084	4.3775	11.3989	0.000734879	0.00247322
FBgn0022984	0.0737804	5.67117	2.74292	0.0976862	0.177794
FBgn0022985	0.13095	6.46183	6.14893	0.0131491	0.0320081
FBgn0022986	-0.0612948	5.5945	1.06279	0.30258	0.43647
FBgn0022987	-0.30313	6.21922	24.9296	5.94615e-07	3.73888e-06
FBgn0023000	0.0729823	2.77285	0.195469	0.658403	0.761653
FBgn0023001	-0.153381	3.86298	3.31893	0.0684862	0.132775
FBgn0023023	0.227529	5.33151	9.6015	0.00194418	0.00592337
FBgn0023076	-0.33172	7.31409	13.5205	0.000235971	0.000884843
FBgn0023081	-0.0725868	6.66701	2.71894	0.0991637	0.180139
FBgn0023083	-0.148012	6.09395	4.77405	0.0288918	0.0635566
FBgn0023090	-0.0558272	6.40865	0.247349	0.618948	0.730396
FBgn0023095	0.227793	6.29589	14.2864	0.000156994	0.000606244
FBgn0023096	0.148391	1.43303	0.302026	0.582615	0.699479
FBgn0023097	0.0443564	7.00864	0.671881	0.412396	0.547681
FBgn0023129	-0.251529	7.25462	5.51508	0.0188532	0.0437855
FBgn0023130	-0.163148	4.12248	3.73235	0.0533681	0.107612
FBgn0023143	-0.186086	9.37472	23.0822	1.55221e-06	8.96717e-06
FBgn0023167	0.248442	5.65135	9.36479	0.00221194	0.00665667
FBgn0023169	-0.0920323	7.58904	5.55939	0.0183818	0.0428169
FBgn0023170	0.309094	8.31411	18.8801	1.39195e-05	6.64497e-05
FBgn0023171	-0.0190373	5.20405	0.0783755	0.779511	0.85328
FBgn0023172	-0.0149895	8.27547	0.0611987	0.804611	0.871051
FBgn0023174	-0.121137	7.37308	10.1513	0.001442	0.00455173
FBgn0023175	0.311434	7.22705	43.3945	4.47447e-11	5.85271e-10
FBgn0023177	0.478598	6.1724	52.762	3.76525e-13	7.06508e-12
FBgn0023178	0.430257	3.21763	10.1674	0.00142942	0.0045177
FBgn0023179	0.128776	5.61752	3.94987	0.046875	0.0963689
FBgn0023180	0.14892	3.54133	4.3004	0.0381034	0.0806679
FBgn0023181	0.507095	4.14005	26.6585	2.42784e-07	1.64825e-06
FBgn0023197	0.645134	9.00975	15.3306	9.02431e-05	0.000367541
FBgn0023211	0.0185987	6.15788	0.217523	0.640934	0.747766
FBgn0023212	-0.0194834	7.36195	0.221965	0.637547	0.745092
FBgn0023213	-0.229895	9.61125	9.84296	0.00170483	0.00528262
FBgn0023214	0.282257	1.75456	2.41025	0.120543	0.211263
FBgn0023215	0.0538869	8.02753	0.376302	0.539589	0.665
FBgn0023216	0.300617	5.59775	25.2009	5.1657e-07	3.29192e-06
FBgn0023388	-0.121204	6.7155	6.82546	0.00898672	0.0230381
FBgn0023395	0.0742075	5.32286	0.642376	0.422852	0.558351
FBgn0023407	-0.139391	7.25227	5.03673	0.0248153	0.0555583
FBgn0023423	-0.0520687	7.86939	1.60447	0.205271	0.321452
FBgn0023441	-0.0832212	8.26748	3.60458	0.0576206	0.114671
FBgn0023458	-0.120637	8.11322	4.21525	0.0400621	0.0841367
FBgn0023477	0.013523	7.70527	0.0171073	0.895938	0.935179
FBgn0023479	0.0521289	8.90427	0.625291	0.429088	0.563908
FBgn0023489	0.812839	2.38458	22.8952	1.71079e-06	9.81135e-06
FBgn0023495	0.189597	1.72593	0.189891	0.663007	0.765949
FBgn0023506	0.578082	5.10947	87.8151	7.18688e-21	5.52572e-19
FBgn0023507	0.525629	6.98781	43.0794	5.2563e-11	6.74475e-10
FBgn0023508	-0.182042	6.48648	19.6317	9.38977e-06	4.67856e-05
FBgn0023510	-0.0853829	6.3816	2.24398	0.134136	0.230013
FBgn0023511	-0.0707302	5.34503	2.11961	0.145424	0.245409
FBgn0023512	0.274879	5.58986	32.2143	1.38071e-08	1.14538e-07
FBgn0023513	0.357592	4.68335	28.7318	8.31294e-08	6.11318e-07
FBgn0023514	0.105466	4.98107	2.21004	0.137115	0.234188
FBgn0023515	-0.00264724	7.43272	0.00194959	0.964782	0.977415
FBgn0023516	-0.0474787	5.73516	1.02717	0.310825	0.445307
FBgn0023517	0.442744	5.30407	86.0871	1.72185e-20	1.21519e-18
FBgn0023518	0.0255007	6.56018	0.212066	0.645153	0.750734
FBgn0023519	0.533421	4.70491	64.5882	9.23054e-16	2.75373e-14
FBgn0023520	0.28531	3.17647	15.2015	9.66245e-05	0.000391675
FBgn0023521	0.471981	4.06401	58.1862	2.38443e-14	5.46846e-13
FBgn0023522	0.298694	5.95946	57.6346	3.15627e-14	7.07319e-13
FBgn0023524	0.0672528	3.34024	0.278995	0.59736	0.712388
FBgn0023525	0.8092	4.36975	91.8483	9.35815e-22	8.59224e-20
FBgn0023526	0.0708504	6.79736	1.38748	0.238831	0.36196
FBgn0023527	0.494043	5.72433	59.63	1.14474e-14	2.80462e-13
FBgn0023528	0.0624846	7.671	1.31091	0.25223	0.378265
FBgn0023529	-0.00374525	7.98339	0.00539427	0.941451	0.962469
FBgn0023530	0.128774	4.59611	3.17951	0.0745672	0.142634
FBgn0023531	-0.000710406	6.11565	8.74855e-05	0.992537	0.995062
FBgn0023534	-0.0176924	1.92982	0.0148735	0.902933	0.94001
FBgn0023535	0.32577	5.04931	9.64975	0.00189378	0.00579781
FBgn0023536	0.185887	4.99622	12.483	0.00041067	0.00145566
FBgn0023537	0.0847815	7.74686	1.65801	0.197872	0.312871
FBgn0023540	0.0527944	7.26868	0.416282	0.518798	0.646833
FBgn0023541	-0.474113	4.43717	6.36042	0.0116694	0.0288365
FBgn0023542	0.341183	5.2199	36.9135	1.23485e-09	1.25569e-08
FBgn0023545	0.260626	4.73266	24.2172	8.60622e-07	5.24752e-06
FBgn0023549	-0.0207931	6.3523	0.136304	0.711983	0.80464
FBgn0023550	-0.329304	5.21297	1.86978	0.171501	0.279973
FBgn0024150	0.0303215	2.75367	0.0451936	0.831649	0.889775
FBgn0024177	-0.0235834	6.50187	0.214593	0.643191	0.749598
FBgn0024179	0.0342108	5.85312	0.27174	0.602167	0.716494
FBgn0024182	0.0841405	4.56064	1.54368	0.21407	0.332697
FBgn0024183	-0.0556913	8.29763	1.32539	0.249627	0.374975
FBgn0024184	-0.325088	2.64163	3.61414	0.0572903	0.114086
FBgn0024187	0.0938425	6.99109	5.23919	0.0220836	0.0502393
FBgn0024188	-0.406899	6.2573	56.4917	5.64354e-14	1.21023e-12
FBgn0024189	0.246528	4.18511	5.13621	0.0234317	0.0528611
FBgn0024191	0.273378	4.37493	9.94373	0.00161398	0.00503079
FBgn0024194	0.108159	3.38376	2.6597	0.10292	0.185605
FBgn0024196	0.0933805	3.99015	1.69653	0.192742	0.306243
FBgn0024222	-0.580377	5.48739	72.7415	1.47792e-17	6.38204e-16
FBgn0024227	0.63497	4.37465	79.863	4.01283e-19	2.1936e-17
FBgn0024230	-0.0431642	5.17974	0.690057	0.406145	0.541737
FBgn0024232	0.0202438	4.20975	0.0429319	0.835854	0.892595
FBgn0024234	-0.122919	5.29021	4.89861	0.0268784	0.0596268
FBgn0024236	-0.354443	7.57845	109.254	1.42742e-25	2.10924e-23
FBgn0024238	-0.0221461	7.66516	0.285499	0.593119	0.708134
FBgn0024245	-0.368539	3.74947	21.0133	4.56109e-06	2.40973e-05
FBgn0024248	-0.140114	6.35081	6.27096	0.0122733	0.0300929
FBgn0024250	-0.498492	4.20795	29.6122	5.27728e-08	4.00861e-07
FBgn0024251	0.0130452	7.63224	0.0866881	0.768431	0.84601
FBgn0024273	0.0454725	6.32094	1.20365	0.272592	0.402798
FBgn0024277	-0.0361413	7.53685	0.665243	0.414715	0.54991
FBgn0024285	-0.384375	6.26776	69.4231	7.94527e-17	2.92367e-15
FBgn0024288	0.302184	0.939803	1.56292	0.211238	0.329106
FBgn0024289	-1.30164	6.93414	29.1277	6.77621e-08	5.09806e-07
FBgn0024291	-0.0360073	7.14942	0.64786	0.420879	0.556056
FBgn0024293	0.248939	7.83808	11.9521	0.000545851	0.00188605
FBgn0024294	-0.132163	2.61531	0.230018	0.63151	0.740508
FBgn0024314	0.341066	6.41526	43.9237	3.41429e-11	4.59302e-10
FBgn0024315	0.136631	7.80833	4.39025	0.036145	0.0770739
FBgn0024320	-0.292524	7.0328	15.8411	6.88895e-05	0.000287252
FBgn0024326	0.0258356	6.56901	0.422899	0.515494	0.643738
FBgn0024329	-0.0596909	7.38791	1.46097	0.226775	0.347926
FBgn0024330	-0.0265688	4.63352	0.135185	0.713116	0.805438
FBgn0024332	0.621908	6.22672	68.9616	1.00401e-16	3.58298e-15
FBgn0024352	-0.462794	7.87959	121.795	2.55988e-28	6.20738e-26
FBgn0024360	0.282887	4.95865	18.7155	1.51747e-05	7.18973e-05
FBgn0024361	0.381367	4.25806	15.3072	9.1366e-05	0.000371954
FBgn0024362	0.0359153	6.5913	1.00397	0.316351	0.451991
FBgn0024364	0.20291	5.73763	10.7842	0.00102371	0.00333261
FBgn0024365	0.100573	6.34367	5.24247	0.022042	0.0501687
FBgn0024366	0.833239	2.25763	19.2284	1.15978e-05	5.64781e-05
FBgn0024371	-0.419316	5.81905	60.4098	7.70274e-15	1.96581e-13
FBgn0024432	0.364443	6.6307	40.0213	2.5121e-10	2.86228e-09
FBgn0024491	0.117677	4.49266	2.92346	0.0873004	0.162451
FBgn0024509	0.361356	6.64828	53.7216	2.31008e-13	4.49516e-12
FBgn0024510	0.0543621	4.88106	0.634518	0.425703	0.561175
FBgn0024542	0.485188	4.32633	46.5801	8.79504e-12	1.30573e-10
FBgn0024555	-0.0255582	7.66033	0.307666	0.579116	0.696692
FBgn0024556	0.264005	6.90411	22.8883	1.71692e-06	9.83458e-06
FBgn0024558	0.339059	5.9943	41.6715	1.0797e-10	1.33823e-09
FBgn0024689	-0.0424018	5.09414	0.611004	0.43441	0.568297
FBgn0024698	0.0207778	5.25631	0.168678	0.68129	0.780964
FBgn0024728	-0.044763	6.44613	0.514763	0.473084	0.604507
FBgn0024732	0.0996704	6.05162	3.22875	0.0723561	0.139221
FBgn0024733	0.175473	10.3849	10.121	0.00146588	0.00461942
FBgn0024734	-0.432106	8.59226	36.6084	1.44411e-09	1.45133e-08
FBgn0024740	-0.346773	1.94909	1.3961	0.237378	0.360335
FBgn0024754	-0.076352	5.93344	2.39296	0.121883	0.213098
FBgn0024806	0.0289356	6.93291	0.202389	0.6528	0.75656
FBgn0024811	-0.186629	6.68037	7.98807	0.00470866	0.0130586
FBgn0024814	0.274908	6.51618	19.4765	1.01845e-05	5.02689e-05
FBgn0024833	0.184788	6.28552	16.939	3.86004e-05	0.000168301
FBgn0024836	-0.220652	3.28556	2.21212	0.13693	0.234013
FBgn0024841	0.305529	5.12287	15.4721	8.37342e-05	0.000343845
FBgn0024846	0.353199	5.23701	43.8253	3.59042e-11	4.79901e-10
FBgn0024887	0.134546	4.54698	5.36985	0.0204877	0.0470616
FBgn0024889	-0.0940782	6.73844	4.10918	0.042651	0.0888241
FBgn0024891	-0.170146	5.82357	15.0139	0.000106724	0.000428209
FBgn0024909	0.0350607	5.25165	0.27915	0.597259	0.71238
FBgn0024912	-0.110932	2.77197	1.19686	0.273949	0.404235
FBgn0024920	0.645271	4.54849	59.895	1.00055e-14	2.49004e-13
FBgn0024921	-0.0750681	7.94171	1.96649	0.160821	0.266354
FBgn0024941	0.13834	3.19055	0.928844	0.335163	0.470972
FBgn0024943	0.320931	5.80913	20.3171	6.561e-06	3.3521e-05
FBgn0024944	0.0966339	3.74508	1.20038	0.273246	0.403528
FBgn0024945	-0.046473	5.15585	0.605196	0.436602	0.570218
FBgn0024947	-0.26771	7.37799	31.3424	2.16305e-08	1.7365e-07
FBgn0024956	0.367083	4.62924	31.863	1.6544e-08	1.35813e-07
FBgn0024957	-0.0990569	7.18018	2.67532	0.101915	0.184185
FBgn0024958	0.121452	5.97907	5.42682	0.0198298	0.0457391
FBgn0024963	-0.241766	7.47524	5.8301	0.0157543	0.0374154
FBgn0024973	0.528838	5.7888	67.6082	1.99432e-16	6.7358e-15
FBgn0024975	-0.277207	4.05572	20.3708	6.3796e-06	3.27002e-05
FBgn0024977	0.219921	1.12459	1.18088	0.277176	0.408295
FBgn0024980	0.480438	3.81757	24.4667	7.56053e-07	4.66405e-06
FBgn0024983	-0.0192888	5.28123	0.171338	0.678925	0.77901
FBgn0024985	-0.156597	6.64889	16.2661	5.50408e-05	0.000233208
FBgn0024986	-0.0610831	4.92252	0.69906	0.4031	0.538434
FBgn0024987	0.0181945	6.04585	0.0725814	0.787615	0.859604
FBgn0024989	0.780772	2.70006	13.6873	0.000215911	0.000814795
FBgn0024991	0.246239	5.92704	12.9556	0.00031896	0.00116373
FBgn0024992	0.219589	6.24717	18.5424	1.66167e-05	7.8259e-05
FBgn0024993	0.430731	4.4127	22.1975	2.46e-06	1.36367e-05
FBgn0024994	-0.0542024	4.90597	0.617982	0.431798	0.566133
FBgn0024995	0.242812	5.20238	6.62593	0.0100504	0.0253594
FBgn0024996	0.301061	5.49955	32.8524	9.94271e-09	8.4863e-08
FBgn0024997	0.379997	4.48029	15.3884	8.75246e-05	0.000357856
FBgn0024998	0.0964568	4.80372	1.69501	0.192941	0.306427
FBgn0025109	0.261177	5.13464	24.8519	6.19065e-07	3.86946e-06
FBgn0025111	0.214916	6.29105	3.23546	0.0720602	0.138765
FBgn0025117	0.286948	8.16084	50.9359	9.5433e-13	1.67442e-11
FBgn0025140	0.378244	6.49169	50.1689	1.41067e-12	2.42118e-11
FBgn0025185	-0.734073	3.8467	118.981	1.05712e-27	2.32492e-25
FBgn0025186	0.00658171	6.50692	0.0192225	0.88973	0.930398
FBgn0025286	0.319881	9.72737	36.3329	1.66334e-09	1.65581e-08
FBgn0025335	0.277077	5.87003	28.0165	1.20287e-07	8.64403e-07
FBgn0025336	0.01896	5.13279	0.0710799	0.789771	0.860865
FBgn0025352	-0.0202039	7.34951	0.122938	0.725869	0.815123
FBgn0025355	-0.0637945	5.47374	0.812487	0.367386	0.502657
FBgn0025360	0.361787	3.97972	4.48379	0.0342178	0.0735449
FBgn0025366	-0.0429529	7.05768	0.817878	0.365801	0.500924
FBgn0025373	-0.11831	5.81077	4.33609	0.0373126	0.0792778
FBgn0025381	0.337666	5.7098	22.5439	2.05394e-06	1.1586e-05
FBgn0025382	-0.0489609	1.57665	0.0779453	0.780101	0.853572
FBgn0025383	0.580477	-0.45693	2.54999	0.110295	0.196841
FBgn0025390	0.168451	6.80307	0.742887	0.388738	0.524062
FBgn0025391	-0.071148	3.33286	0.53656	0.463862	0.596025
FBgn0025393	-0.831852	0.6095	12.6601	0.00037355	0.00133661
FBgn0025394	-0.00203425	6.49154	0.00190136	0.96522	0.977415
FBgn0025454	-0.642028	10.8146	44.4469	2.61352e-11	3.60644e-10
FBgn0025455	0.0141883	7.89714	0.0980625	0.754167	0.835487
FBgn0025456	-0.0242842	5.75366	0.149462	0.69905	0.794677
FBgn0025457	0.0358504	5.89488	0.553647	0.456831	0.589072
FBgn0025463	0.506574	6.37796	68.7971	1.09135e-16	3.86551e-15
FBgn0025469	0.213957	4.34114	9.45949	0.00210059	0.00636096
FBgn0025519	0.223293	4.98687	13.3801	0.000254305	0.000947208
FBgn0025525	-0.132779	5.68807	3.14529	0.0761466	0.145039
FBgn0025549	-0.0752676	6.18732	0.430017	0.511981	0.640365
FBgn0025558	0.692117	3.17461	40.7758	1.70733e-10	2.02588e-09
FBgn0025571	0.0458933	6.69634	0.807257	0.368932	0.504117
FBgn0025574	0.130049	6.52003	5.09204	0.0240359	0.0540539
FBgn0025582	0.256896	7.99006	28.1551	1.11975e-07	8.07125e-07
FBgn0025583	1.18147	6.06521	44.1903	2.97953e-11	4.03688e-10
FBgn0025592	0.0270366	6.00083	0.17885	0.672363	0.773545
FBgn0025595	0.347332	5.5234	18.6664	1.55705e-05	7.36619e-05
FBgn0025608	-0.0871587	7.09809	5.6632	0.0173245	0.0406041
FBgn0025615	0.143978	4.71741	7.59013	0.00586888	0.0158804
FBgn0025620	0.487074	6.44441	22.0448	2.66359e-06	1.46707e-05
FBgn0025621	0.357296	5.78149	40.1215	2.38644e-10	2.73227e-09
FBgn0025624	-0.0647641	4.38845	0.88404	0.347098	0.483218
FBgn0025625	0.378785	4.80707	24.7506	6.52479e-07	4.06221e-06
FBgn0025626	-0.0632897	6.59284	1.30112	0.254009	0.380269
FBgn0025628	0.16165	7.40709	6.28935	0.0121465	0.0298131
FBgn0025629	0.427242	4.02414	38.1829	6.4415e-10	6.86778e-09
FBgn0025630	0.349647	4.04523	21.5051	3.52898e-06	1.90815e-05
FBgn0025631	-0.109919	5.56488	3.07254	0.0796247	0.150513
FBgn0025632	-0.107958	3.15852	1.74536	0.186461	0.298801
FBgn0025633	0.0610762	7.62394	1.13949	0.285761	0.41743
FBgn0025634	0.44412	4.70151	50.8449	9.99607e-13	1.74737e-11
FBgn0025635	0.0464263	5.49035	0.660841	0.416263	0.551268
FBgn0025637	-0.198652	6.78984	27.9276	1.25939e-07	9.01594e-07
FBgn0025638	0.130514	6.18387	5.97285	0.0145278	0.0348704
FBgn0025639	0.012997	7.57567	0.0618699	0.803564	0.870531
FBgn0025640	-0.070577	5.65545	1.08309	0.298007	0.431519
FBgn0025641	0.109824	7.06001	5.59	0.0180633	0.0421789
FBgn0025643	-0.108055	3.8211	0.881175	0.34788	0.484094
FBgn0025674	0.339487	6.00332	54.7281	1.3841e-13	2.77907e-12
FBgn0025676	0.13735	0.891022	0.436543	0.508796	0.637055
FBgn0025678	0.050885	7.06152	0.60102	0.438189	0.571751
FBgn0025680	0.351129	6.25071	16.1222	5.93833e-05	0.000249595
FBgn0025681	0.00245975	7.1047	0.00328982	0.954261	0.971132
FBgn0025682	0.106279	6.19961	2.69309	0.100784	0.182589
FBgn0025683	-0.0715079	9.4943	2.79283	0.0946869	0.173269
FBgn0025684	0.190864	4.96332	9.55831	0.00199047	0.00605463
FBgn0025686	0.0845235	2.93913	0.376023	0.539739	0.665057
FBgn0025687	0.456583	4.57875	7.40892	0.00649013	0.0173382
FBgn0025692	0.334751	4.40311	8.81075	0.0029946	0.00866584
FBgn0025693	-0.390352	5.02075	38.4125	5.72652e-10	6.18216e-09
FBgn0025697	0.13108	5.87914	3.43624	0.0637807	0.124958
FBgn0025700	-0.0492615	6.97004	0.726038	0.39417	0.528882
FBgn0025702	0.127706	5.9575	3.34481	0.0674172	0.131024
FBgn0025709	0.279306	5.17083	2.81545	0.0933607	0.171406
FBgn0025712	0.0503591	5.31923	0.367089	0.544595	0.668635
FBgn0025716	-0.0463377	5.14686	0.841045	0.359098	0.493703
FBgn0025720	0.0821402	5.43614	2.81501	0.0933865	0.17142
FBgn0025724	0.110117	7.06334	6.63763	0.00998465	0.0252136
FBgn0025725	-0.141667	7.20278	13.0559	0.000302328	0.00110647
FBgn0025726	-0.206949	7.55857	3.00198	0.0831627	0.155953
FBgn0025739	-0.136765	0.924732	0.364651	0.545935	0.669452
FBgn0025740	-0.143466	7.0686	2.68223	0.101473	0.183627
FBgn0025741	-0.0495041	8.61527	0.451527	0.501611	0.62992
FBgn0025742	0.264947	5.50537	25.087	5.48001e-07	3.47116e-06
FBgn0025743	0.12901	6.90652	7.55231	0.00599332	0.016194
FBgn0025777	-0.225847	6.843	25.2549	5.02327e-07	3.20331e-06
FBgn0025781	-0.413632	5.44372	56.9597	4.44833e-14	9.6486e-13
FBgn0025790	0.0817475	5.69336	2.66195	0.102775	0.185449
FBgn0025800	-0.0870286	5.60609	2.01318	0.155938	0.259998
FBgn0025802	-0.0161572	6.19274	0.0952326	0.757628	0.838096
FBgn0025806	0.096452	5.88882	2.34721	0.125507	0.218465
FBgn0025807	0.0613506	3.73689	0.485757	0.485826	0.61654
FBgn0025808	0.0475398	4.13216	0.336226	0.562016	0.682896
FBgn0025809	-0.0145121	4.55953	0.0544705	0.815459	0.878637
FBgn0025814	-0.29479	7.40532	17.6222	2.69424e-05	0.000121562
FBgn0025815	0.342378	6.36572	36.088	1.886e-09	1.86568e-08
FBgn0025820	0.16468	3.57289	6.68011	0.00974946	0.0247054
FBgn0025825	0.347646	4.8287	43.0994	5.20278e-11	6.68966e-10
FBgn0025827	0.315098	4.49405	10.4963	0.00119611	0.00383834
FBgn0025830	0.0855699	4.97159	2.24599	0.133961	0.229756
FBgn0025832	0.0879636	4.99987	1.57228	0.209876	0.327416
FBgn0025833	0.523724	2.56399	9.16885	0.00246169	0.0072819
FBgn0025836	-0.102866	7.14471	5.52812	0.0187132	0.0435352
FBgn0025839	-0.148246	6.44506	3.15198	0.0758349	0.144474
FBgn0025864	0.0184997	7.81201	0.163716	0.685758	0.783806
FBgn0025865	0.129059	6.21259	7.06819	0.00784645	0.0204306
FBgn0025866	-0.0503337	6.45755	0.999307	0.317478	0.453113
FBgn0025874	-0.102881	4.04266	3.05839	0.0803211	0.151646
FBgn0025878	0.360851	3.36598	7.38492	0.00657732	0.0175265
FBgn0025879	-0.210924	6.17219	12.5182	0.000403006	0.00143118
FBgn0025885	-0.1687	7.82213	9.01871	0.0026723	0.00782412
FBgn0025936	-0.130274	7.4001	4.44172	0.0350709	0.0751394
FBgn0026015	0.19788	6.195	21.7724	3.06988e-06	1.67717e-05
FBgn0026056	-0.235862	5.19556	19.214	1.16854e-05	5.68527e-05
FBgn0026059	-0.25628	7.56865	43.1029	5.19349e-11	6.68966e-10
FBgn0026060	-0.45014	6.22199	124.619	6.16817e-29	1.62034e-26
FBgn0026061	-0.103052	6.65743	2.17428	0.140335	0.238562
FBgn0026064	-0.291767	2.35521	1.68515	0.194241	0.308016
FBgn0026076	-0.159189	6.38265	10.6252	0.00111557	0.00359332
FBgn0026077	0.724223	4.77021	14.4805	0.000141618	0.000553212
FBgn0026079	0.493322	5.80485	105.402	9.96919e-25	1.38645e-22
FBgn0026080	-0.00180941	5.1343	0.00117808	0.972619	0.982594
FBgn0026083	-0.390608	8.4784	46.4076	9.60444e-12	1.41699e-10
FBgn0026084	-0.0138489	8.36753	0.0624481	0.802668	0.870166
FBgn0026085	0.716462	3.58936	77.0927	1.63123e-18	8.11923e-17
FBgn0026086	-0.194802	7.15	9.80053	0.00174462	0.00538933
FBgn0026088	0.0610057	5.01831	0.78804	0.374693	0.510293
FBgn0026089	0.263417	4.33157	10.9675	0.000927255	0.00304798
FBgn0026090	0.0479598	4.93059	0.454657	0.500132	0.628537
FBgn0026143	0.33449	6.4332	39.2474	3.73356e-10	4.14416e-09
FBgn0026144	-0.153834	6.6335	3.62568	0.0568944	0.113499
FBgn0026147	0.018593	8.25775	0.161982	0.687339	0.784854
FBgn0026148	0.0401424	3.5596	0.255492	0.613234	0.725661
FBgn0026149	0.0859684	4.99204	4.13451	0.0420171	0.0876392
FBgn0026150	0.0646709	5.68965	1.98121	0.159263	0.264562
FBgn0026160	-0.142085	7.77901	4.15408	0.0415344	0.0868238
FBgn0026176	-0.104663	4.90643	0.613668	0.43341	0.567381
FBgn0026179	-0.175959	7.25789	11.8874	0.000565148	0.00194524
FBgn0026181	-0.124763	7.45522	5.92999	0.0148853	0.0356021
FBgn0026189	-0.0714274	7.57279	2.36389	0.124172	0.21654
FBgn0026190	0.0486665	1.65294	0.0336508	0.854452	0.905472
FBgn0026192	-0.0751746	6.91444	2.51116	0.113043	0.200681
FBgn0026196	0.138096	7.00706	5.10937	0.0237969	0.0535445
FBgn0026197	0.196125	6.78398	3.63639	0.0565293	0.112856
FBgn0026199	-0.420794	6.50492	30.2011	3.89487e-08	3.00439e-07
FBgn0026206	-0.0503599	7.80276	0.304695	0.580954	0.698537
FBgn0026207	-0.576934	5.57062	161.381	5.64761e-37	3.81496e-34
FBgn0026239	0.179019	6.64902	10.6791	0.00108353	0.00349964
FBgn0026250	-0.0559625	8.67835	1.70732	0.191334	0.304671
FBgn0026252	-0.0503513	8.82392	1.90381	0.167653	0.275259
FBgn0026255	-0.138822	4.64205	2.32303	0.127472	0.221248
FBgn0026257	0.0841784	5.01716	0.753592	0.385341	0.521565
FBgn0026259	-0.0364086	8.31668	0.841891	0.358857	0.493703
FBgn0026261	-0.0645072	5.08675	1.14332	0.284953	0.416442
FBgn0026262	-0.186277	8.08061	6.6982	0.00965104	0.024502
FBgn0026263	0.152845	5.00665	2.47499	0.11567	0.204351
FBgn0026268	-0.139975	4.64077	2.44803	0.117672	0.207269
FBgn0026309	-0.490242	4.80817	69.2296	8.76431e-17	3.18785e-15
FBgn0026313	0.0303715	6.55439	0.439233	0.507493	0.635845
FBgn0026314	-0.216718	6.37994	4.80859	0.0283182	0.0624637
FBgn0026315	-0.176036	3.45251	2.13595	0.143881	0.243196
FBgn0026316	0.297559	6.68601	50.0141	1.52642e-12	2.61038e-11
FBgn0026317	0.04463	6.79947	0.766847	0.381194	0.516691
FBgn0026318	0.096601	4.8788	3.26822	0.0706343	0.136324
FBgn0026319	0.360877	3.1639	10.7369	0.0010502	0.00340946
FBgn0026323	-0.16714	6.77499	14.316	0.000154543	0.000598001
FBgn0026324	0.147808	4.38696	4.15692	0.0414648	0.0866974
FBgn0026326	-0.585104	5.93084	148.712	3.31535e-34	1.56766e-31
FBgn0026361	-0.0502962	3.64438	0.24829	0.618282	0.730156
FBgn0026369	-0.0638672	6.90705	2.15291	0.1423	0.241171
FBgn0026370	0.00925915	8.63084	0.0429717	0.835779	0.892595
FBgn0026371	-0.0768749	5.12146	1.07598	0.299598	0.433217
FBgn0026372	0.341239	10.5822	52.3209	4.71335e-13	8.72292e-12
FBgn0026373	0.684041	4.36789	60.6096	6.95954e-15	1.80814e-13
FBgn0026374	-0.234229	3.66875	4.57369	0.0324665	0.0704371
FBgn0026375	0.0468158	7.74106	1.02402	0.311567	0.446172
FBgn0026376	0.0140857	5.85935	0.0859777	0.769354	0.846514
FBgn0026378	0.244376	4.31168	11.7135	0.000620497	0.00211919
[truncated: 7,458 more rows]

## Sheet: male_evolution
Gene_ID	logFC	logCPM	LR	PValue	padj
dsim_PG00010	-0.244395	0.332881	0.671408	0.412561	0.592555
dsim_PG00026	-0.102227	4.36951	1.28264	0.257408	0.437227
dsim_PG00027	-0.0439442	4.26153	0.169999	0.680113	0.809646
dsim_PG00028	-0.06615	4.66017	0.618329	0.431669	0.61135
dsim_PG00029	-0.183901	8.13713	8.67803	0.00322068	0.0176364
dsim_PG00034	0.124804	7.87321	1.46297	0.226458	0.402408
dsim_PG00041	0.411417	4.64396	6.40008	0.0114115	0.0466171
dsim_PG00042	-0.0475515	3.97905	0.142602	0.705708	0.824648
dsim_PG00043	-0.621189	0.457172	3.93305	0.0473461	0.134218
dsim_PG00044	-0.373038	2.39738	4.9751	0.0257147	0.0855396
dsim_PG00056	-0.664368	2.39141	26.1884	3.0967e-07	9.44694e-06
dsim_PG00062	-0.0222932	3.35399	0.0395364	0.84239	0.910767
dsim_PG00064	1.3009	0.619646	12.8967	0.000329158	0.00286684
dsim_PG00074	-0.113236	2.12415	0.616656	0.432292	0.611913
dsim_PG00076	-0.0914254	2.35224	0.830629	0.362091	0.543926
dsim_PG00099	0.283893	-0.303796	0.885182	0.346786	0.528906
dsim_PG00100	-0.0337199	4.72674	0.136225	0.712063	0.828696
dsim_PG00108	0.104319	3.168	0.369749	0.543141	0.706046
dsim_PG00121	-0.305329	6.35289	6.91588	0.00854335	0.0374048
dsim_PG00127	0.0358245	3.61312	0.116126	0.733275	0.840861
dsim_PG00129	0.114557	3.58614	1.70493	0.191644	0.359708
dsim_PG00140	0.0548698	1.78088	0.123278	0.725506	0.836211
dsim_PG00141	0.517944	3.5368	21.6329	3.30141e-06	7.06366e-05
dsim_PG00147	-0.17321	1.27532	1.13135	0.287487	0.471108
dsim_PG00150	-0.143139	2.75941	1.77149	0.183198	0.348887
dsim_PG00171	0.00272335	4.14089	0.000523316	0.981749	0.990653
dsim_PG00172	-0.131064	0.371823	0.465338	0.49514	0.667218
dsim_PG00174	0.097638	3.65296	0.937035	0.333042	0.514775
dsim_PG00175	-0.00686102	4.26072	0.00590909	0.938727	0.968935
dsim_PG00176	-0.1026	0.516963	0.266492	0.605695	0.756379
dsim_PG00177	-0.493819	6.90727	3.99494	0.045637	0.130587
dsim_PG00182	0.0480564	3.57887	0.194867	0.658897	0.793655
dsim_PG00183	0.124676	5.27402	1.78658	0.181343	0.346877
dsim_PG00184	-0.0445641	2.22484	0.102801	0.748494	0.850719
dsim_PG00187	0.153858	2.86955	3.02509	0.0819859	0.200346
dsim_PG00188	-0.036181	3.70017	0.129776	0.718665	0.833098
dsim_PG00190	0.0465352	4.7007	0.22049	0.638667	0.779439
dsim_PG00191	-0.0715407	2.8625	0.682344	0.408781	0.588946
dsim_PG00196	0.0485683	2.94101	0.165956	0.683731	0.811481
dsim_PG00198	0.0392738	1.31622	0.0632765	0.80139	0.886108
dsim_PG00200	-0.546548	0.200208	6.99277	0.00818396	0.0362923
dsim_PG00201	-0.2255	1.46732	2.83854	0.0920276	0.216171
dsim_PG00202	-0.604738	1.15421	12.3335	0.000444913	0.00367471
dsim_PG00207	-0.172599	4.58045	8.40013	0.00375194	0.0199562
dsim_PG00226	0.295402	1.21594	3.03814	0.0813288	0.199514
dsim_PG00228	-0.278307	1.23669	1.38749	0.23883	0.415492
dsim_PG00237	-0.247691	2.68837	5.47737	0.0192642	0.0690342
dsim_PG00238	-0.142899	5.82856	1.6781	0.195178	0.364062
dsim_PG00243	0.0360096	3.13035	0.0727811	0.78733	0.877419
dsim_PG00245	-0.297063	1.32712	3.99597	0.0456093	0.130586
dsim_PG00247	0.0848116	4.55602	0.735275	0.391179	0.573814
dsim_PG00249	-0.0694174	3.47254	0.0885553	0.766022	0.862358
dsim_PG00250	-0.127685	3.17273	0.56406	0.452629	0.628655
dsim_PG00255	-0.101647	5.22016	0.73844	0.390161	0.573121
dsim_PG00257	-0.232375	4.38441	2.70418	0.100086	0.22929
dsim_PG00258	0.07473	2.11581	0.446815	0.503851	0.675301
dsim_PG00261	-1.26178	4.18541	22.6658	1.9277e-06	4.5462e-05
dsim_PG00265	0.222062	0.920532	1.45978	0.226964	0.403156
dsim_PG00272	-0.596698	4.0875	7.13571	0.00755637	0.0341101
dsim_PG00275	0.234043	6.85833	6.93108	0.00847104	0.0372088
dsim_PG00276	0.166572	1.95447	1.25555	0.262495	0.443447
dsim_PG00278	0.194477	4.23283	1.68745	0.193937	0.362391
FBgn0000008	-0.239326	5.21701	11.9565	0.000544576	0.00428457
FBgn0000014	0.0487088	4.44802	0.226216	0.634344	0.776167
FBgn0000015	0.160177	4.34339	5.41935	0.0199148	0.0706961
FBgn0000017	-0.11756	7.24849	4.30264	0.0380532	0.114572
FBgn0000018	-0.156428	3.36041	2.63555	0.104496	0.23593
FBgn0000024	-0.400101	6.48124	20.6467	5.52323e-06	0.00010595
FBgn0000032	0.17507	5.67384	8.08876	0.00445405	0.0226898
FBgn0000037	-0.252115	4.24891	14.8929	0.000113788	0.00122562
FBgn0000038	-0.277116	6.86975	7.65699	0.00565528	0.0271864
FBgn0000039	-0.0324057	3.41219	0.146988	0.70143	0.822291
FBgn0000044	-0.0980998	9.55026	1.20031	0.273259	0.456285
FBgn0000045	-0.596151	9.63543	19.7894	8.64593e-06	0.000153901
FBgn0000046	-0.37158	8.13578	43.6063	4.01535e-11	4.80673e-09
FBgn0000047	-1.48428	7.9598	61.6512	4.10026e-15	1.38486e-12
FBgn0000052	0.510665	7.16185	21.9601	2.78379e-06	6.12241e-05
FBgn0000053	0.533	7.10426	19.464	1.02515e-05	0.000174682
FBgn0000054	0.0791755	5.41032	1.6998	0.192314	0.360571
FBgn0000055	0.773216	11.2557	29.3532	6.03153e-08	2.36681e-06
FBgn0000056	1.10552	0.390826	13.8131	0.000201925	0.00195456
FBgn0000057	-0.0211662	5.68811	0.244393	0.621051	0.767448
FBgn0000061	-0.446642	-0.366735	2.79654	0.0944682	0.220524
FBgn0000063	0.302171	5.03133	5.1433	0.0233363	0.0798084
FBgn0000064	-0.0506252	12.0129	0.974527	0.323554	0.505342
FBgn0000071	-0.139971	0.275069	0.160644	0.688564	0.814274
FBgn0000075	0.160555	1.7725	0.469027	0.493435	0.665953
FBgn0000077	0.0628179	3.87446	0.448205	0.503188	0.674795
FBgn0000083	0.236865	7.71765	23.4482	1.28326e-06	3.20205e-05
FBgn0000092	0.690796	3.98578	12.1879	0.000481015	0.0039114
FBgn0000097	0.0932857	6.78805	2.97984	0.0843076	0.203548
FBgn0000099	0.371687	5.3573	22.8676	1.73551e-06	4.15511e-05
FBgn0000100	0.0456389	10.2102	0.665035	0.414788	0.594618
FBgn0000108	-0.192037	7.6282	7.1782	0.00737947	0.0334713
FBgn0000109	-0.0403094	4.09905	0.156761	0.692156	0.816276
FBgn0000114	-0.0743674	9.74914	2.76094	0.0965915	0.224163
FBgn0000115	0.0521605	5.2545	0.792559	0.373328	0.556169
FBgn0000116	-0.022021	10.8077	0.124195	0.724528	0.835952
FBgn0000117	0.00156132	8.63788	0.00145176	0.969606	0.98533
FBgn0000119	-0.0755941	5.52085	2.31469	0.128157	0.272978
FBgn0000120	0.230799	9.88719	16.4472	5.0023e-05	0.000638418
FBgn0000121	0.245094	10.4346	16.1502	5.85133e-05	0.000715861
FBgn0000139	-0.149904	5.24327	6.16794	0.0130086	0.0514848
FBgn0000140	0.00563996	7.62825	0.00548102	0.940983	0.970041
FBgn0000146	-0.410979	5.45612	21.5869	3.38157e-06	7.20259e-05
FBgn0000147	-0.0377541	5.69273	0.270004	0.603329	0.754421
FBgn0000150	0.104026	9.43295	2.40783	0.12073	0.261327
FBgn0000152	-0.0205185	4.68674	0.0900233	0.764148	0.86085
FBgn0000153	0.018438	6.73676	0.0701265	0.791153	0.878819
FBgn0000157	-0.0886639	3.55	1.67299	0.195859	0.36463
FBgn0000163	0.023397	7.12791	0.195761	0.658164	0.793102
FBgn0000173	-0.102064	6.74085	5.39267	0.0202216	0.0715701
FBgn0000179	0.0660282	1.93648	0.371349	0.54227	0.705732
FBgn0000180	-0.252005	2.19982	3.473	0.062378	0.163909
FBgn0000181	0.0883448	8.62253	3.43991	0.0636392	0.166575
FBgn0000182	-0.0786483	9.9516	2.04249	0.152959	0.308429
FBgn0000183	0.105478	7.81711	6.317	0.0119586	0.0482681
FBgn0000206	0.0915021	4.94385	2.15733	0.141891	0.293048
FBgn0000210	-0.213808	4.07984	2.63502	0.104531	0.23593
FBgn0000212	-0.0389559	7.50066	0.306019	0.580133	0.736616
FBgn0000221	0.128936	3.11659	1.22956	0.267493	0.449152
FBgn0000228	-0.178543	6.22439	12.8553	0.000336516	0.00291699
FBgn0000229	0.13312	5.731	6.83897	0.00891904	0.0386383
FBgn0000233	-0.131098	0.321915	0.332915	0.563947	0.724137
FBgn0000239	0.160097	7.7966	11.7165	0.0006195	0.00477481
FBgn0000241	-0.0806801	3.20493	0.726892	0.393892	0.576364
FBgn0000242	-0.0566477	5.47738	0.788037	0.374694	0.557327
FBgn0000244	-0.0535927	6.67859	0.838571	0.359806	0.541484
FBgn0000246	0.0915927	3.45915	0.27188	0.602073	0.753602
FBgn0000247	-0.113913	7.10525	4.69426	0.0302635	0.0963177
FBgn0000250	0.0316087	8.36773	0.520179	0.470765	0.645086
FBgn0000251	0.12636	7.25321	5.52493	0.0187473	0.0674703
FBgn0000253	0.0108205	10.0489	0.0295964	0.863409	0.924137
FBgn0000256	-0.0705326	7.80142	2.1872	0.139162	0.289625
FBgn0000257	0.00511947	4.98628	0.00421415	0.94824	0.973344
FBgn0000259	-0.0170252	7.62809	0.0969743	0.755491	0.855714
FBgn0000261	0.064178	9.64688	1.03517	0.308948	0.492204
FBgn0000273	-0.209891	5.46364	6.70489	0.00961491	0.0409218
FBgn0000283	0.130277	7.33228	5.15841	0.023134	0.0793539
FBgn0000286	0.00934845	6.92719	0.0362373	0.849026	0.914909
FBgn0000287	0.0402483	4.72417	0.297573	0.585408	0.740247
FBgn0000289	0.18075	7.64081	18.7927	1.4572e-05	0.000235568
FBgn0000299	-0.261886	8.53194	9.26426	0.00233669	0.0138546
FBgn0000303	-0.0911516	4.99415	2.18289	0.139552	0.290053
FBgn0000307	0.0643508	7.24114	0.692451	0.405332	0.58621
FBgn0000308	0.136584	9.22308	6.4859	0.0108734	0.0448948
FBgn0000313	-0.356825	8.50636	35.5968	2.4268e-09	1.51067e-07
FBgn0000316	0.180294	5.06397	7.64046	0.00570734	0.0273565
FBgn0000317	-0.172428	6.112	7.83849	0.00511453	0.0252971
FBgn0000318	0.0315809	6.61752	0.391857	0.531325	0.696766
FBgn0000319	0.0183481	9.36991	0.260087	0.61006	0.760024
FBgn0000320	0.0272594	4.4564	0.16858	0.681377	0.810048
FBgn0000326	0.183802	5.20283	3.95187	0.0468192	0.133204
FBgn0000330	0.0232267	4.97657	0.145481	0.702892	0.823129
FBgn0000337	-0.208381	0.753733	1.03625	0.308696	0.492099
FBgn0000339	0.143332	5.89184	7.46794	0.00628073	0.0295654
FBgn0000346	-0.0594173	6.85661	0.395344	0.529504	0.695469
FBgn0000352	-0.0547619	6.15461	0.699512	0.402948	0.583743
FBgn0000370	-0.00260774	10.0835	0.002903	0.957031	0.977708
FBgn0000376	0.0911993	6.62386	1.73602	0.187644	0.354911
FBgn0000377	0.0808198	5.46353	1.94872	0.162725	0.322572
FBgn0000382	-0.00438643	7.34734	0.00816997	0.927979	0.963687
FBgn0000384	0.0633646	4.03477	0.495073	0.481673	0.654201
FBgn0000392	-0.0476358	9.06923	0.969507	0.324803	0.506123
FBgn0000394	0.121134	5.40302	4.42698	0.0353751	0.108407
FBgn0000395	0.174119	4.33332	1.65474	0.198315	0.367955
FBgn0000404	-0.0139887	9.5098	0.0627755	0.802162	0.886202
FBgn0000406	-0.0397838	9.01229	0.163262	0.686171	0.812663
FBgn0000409	-0.158452	9.89406	5.18031	0.0228442	0.0785879
FBgn0000411	-0.0891143	2.67001	0.823375	0.364195	0.546004
FBgn0000412	-0.0330361	9.03737	0.639355	0.423945	0.603347
FBgn0000413	0.02924	6.77044	0.252836	0.615085	0.763067
FBgn0000414	-0.374153	7.28824	43.0805	5.25336e-11	6.05866e-09
FBgn0000416	0.0061247	10.0027	0.0176924	0.894183	0.942415
FBgn0000422	-0.300391	6.08064	13.6785	0.000216922	0.00207215
FBgn0000426	0.0192839	4.5381	0.0490701	0.824689	0.900587
FBgn0000439	-0.111764	1.65855	0.575348	0.448141	0.625546
FBgn0000442	-0.11362	4.01349	2.65754	0.10306	0.233913
FBgn0000447	-0.0213112	6.57162	0.17738	0.673634	0.804375
FBgn0000448	-0.233105	4.68043	4.69605	0.0302321	0.0962642
FBgn0000451	-0.371492	3.24172	2.26558	0.132277	0.279412
FBgn0000454	0.0961227	7.93971	3.72783	0.0535128	0.146772
FBgn0000455	0.173089	5.76877	10.5956	0.00113356	0.00769013
FBgn0000459	0.177497	2.29076	2.41873	0.119892	0.260289
FBgn0000463	0.0589862	5.75281	0.179496	0.671807	0.803398
FBgn0000464	-0.0634906	6.88697	1.01176	0.314481	0.497308
FBgn0000473	-0.386771	7.76188	6.63261	0.0100128	0.0421038
FBgn0000477	0.248732	5.05095	7.32608	0.00679613	0.031413
FBgn0000479	-0.221352	8.09872	13.1552	0.000286727	0.0025751
FBgn0000482	-0.0649616	4.98117	1.16468	0.280497	0.463266
FBgn0000489	-0.0230892	6.65164	0.171371	0.678896	0.808656
FBgn0000490	0.186502	4.67226	5.30341	0.0212837	0.0744096
FBgn0000492	0.337127	3.24376	7.37701	0.00660628	0.0307005
FBgn0000497	-0.634347	3.57754	31.5479	1.94578e-08	9.16552e-07
FBgn0000499	-0.0180684	6.53599	0.12853	0.719961	0.833679
FBgn0000500	0.379429	2.31904	11.4897	0.000699844	0.00527785
FBgn0000504	0.296427	6.42844	13.7836	0.000205121	0.00198144
FBgn0000524	-0.27444	5.5611	10.9499	0.000936088	0.00664608
FBgn0000527	-0.328953	5.12591	26.5351	2.58789e-07	8.05056e-06
FBgn0000533	0.183909	4.85746	5.93432	0.0148488	0.0565313
FBgn0000535	-0.131823	3.12237	1.06497	0.302084	0.485604
FBgn0000536	0.336595	7.11626	41.3542	1.27e-10	1.2777e-08
FBgn0000541	-0.111139	8.97226	1.94074	0.163588	0.323719
FBgn0000542	-0.171616	3.74147	2.81345	0.0934769	0.218652
FBgn0000543	-0.216538	5.29204	12.5055	0.000405756	0.00340692
FBgn0000546	-0.191985	6.11476	7.91514	0.00490228	0.0244391
FBgn0000556	0.136105	12.3884	9.81547	0.0017305	0.0108277
FBgn0000557	-0.165166	8.47362	8.30548	0.00395257	0.0207203
FBgn0000559	0.0594178	12.0803	3.04452	0.0810103	0.198991
FBgn0000562	-0.147747	7.70202	11.0802	0.000872567	0.00625616
FBgn0000565	0.0972565	6.37575	0.304569	0.581032	0.737461
FBgn0000566	0.120717	6.22422	2.00244	0.157046	0.31386
FBgn0000567	-0.285431	4.76527	9.09097	0.00256874	0.0149309
FBgn0000568	0.0382456	7.11146	0.44126	0.506515	0.676942
FBgn0000575	-0.0274876	5.01094	0.227387	0.633468	0.775697
FBgn0000576	-0.0907173	2.5695	1.04607	0.306414	0.489817
FBgn0000577	-0.0523857	1.44007	0.169238	0.68079	0.809775
FBgn0000578	-0.0978047	6.60103	2.55501	0.109945	0.244188
FBgn0000579	-0.195429	10.1434	8.53278	0.00348807	0.0187958
FBgn0000581	-0.100133	8.11606	2.75237	0.0971102	0.22465
FBgn0000588	-0.256609	4.89062	8.04734	0.00455704	0.0231325
FBgn0000592	0.240316	10.4927	10.28	0.00134478	0.00885013
FBgn0000594	0.43343	1.43998	3.02232	0.082126	0.2005
FBgn0000611	0.069933	7.4242	2.05996	0.151214	0.30602
FBgn0000615	-0.0698632	10.0698	1.72529	0.189013	0.356359
FBgn0000617	0.168482	4.3516	4.26349	0.0389399	0.116426
FBgn0000618	0.245852	3.5362	4.60604	0.0318595	0.100065
FBgn0000625	-0.442997	1.70629	12.2129	0.000474597	0.00386586
FBgn0000629	0.119059	5.82791	3.0898	0.0787845	0.19505
FBgn0000633	-0.0664018	2.861	0.377475	0.538958	0.70283
FBgn0000635	0.0594657	6.82446	1.2297	0.267465	0.449152
FBgn0000636	-0.00347536	5.93846	0.00386345	0.950438	0.974658
FBgn0000658	-0.42471	2.19783	7.45992	0.00630877	0.0296089
FBgn0000659	0.0975123	5.66833	1.749	0.186002	0.352651
FBgn0000662	-0.0315404	6.62881	0.650436	0.419957	0.600111
FBgn0000667	-0.377121	8.89549	34.2464	4.85581e-09	2.73342e-07
FBgn0000709	0.0208199	6.21644	0.148386	0.700083	0.821629
FBgn0000711	0.0596293	7.2028	1.57272	0.209812	0.383197
FBgn0000715	0.0012174	2.87194	0.000166604	0.989702	0.994698
FBgn0000719	-0.0584733	5.43857	1.043	0.307125	0.490214
FBgn0000721	0.0444747	8.52682	0.707165	0.400387	0.58119
FBgn0000723	-0.227108	6.47128	16.5617	4.70936e-05	0.000606763
FBgn0000810	-0.124689	5.99792	5.54182	0.0185672	0.0670448
FBgn0000826	0.102713	5.13648	0.249575	0.617375	0.764403
FBgn0000927	0.257262	6.99598	2.54833	0.110411	0.244935
FBgn0000964	0.0148032	5.01112	0.00917844	0.923676	0.961286
FBgn0001078	-0.119923	7.44756	3.36417	0.0666291	0.17279
FBgn0001079	-0.0904097	5.05778	1.11628	0.29072	0.474597
FBgn0001083	-0.391147	3.24647	16.1319	5.90801e-05	0.000721861
FBgn0001084	0.0514431	2.76315	0.162179	0.687158	0.81298
FBgn0001085	0.0194991	6.16077	0.0427101	0.836272	0.907048
FBgn0001086	0.176436	6.46122	4.92245	0.0265098	0.0873882
FBgn0001087	0.0257924	6.82511	0.23803	0.625632	0.770291
FBgn0001089	-0.093124	6.38725	1.09658	0.295019	0.478724
FBgn0001091	-0.366504	10.9327	15.0611	0.000104087	0.0011446
FBgn0001092	0.0102324	9.42743	0.0319598	0.858116	0.920984
FBgn0001098	-0.329256	9.09611	33.3708	7.61598e-09	4.00135e-07
FBgn0001099	0.0510401	6.21173	0.555334	0.456147	0.631733
FBgn0001104	0.0893558	6.71186	2.47717	0.11551	0.253275
FBgn0001105	-0.0581351	6.46952	1.19284	0.274757	0.457864
FBgn0001108	0.0782312	7.2718	3.6158	0.0572333	0.153722
FBgn0001112	0.187101	7.80234	5.27082	0.0216858	0.0755647
FBgn0001114	0.160105	7.27833	3.40232	0.0651047	0.169473
FBgn0001122	-0.0793761	6.00479	1.30733	0.252878	0.432063
FBgn0001123	-0.0622636	5.90782	1.44451	0.22941	0.405771
FBgn0001124	0.171865	7.66593	7.69448	0.00553899	0.0268031
FBgn0001125	0.0864734	7.90263	0.823168	0.364256	0.546008
FBgn0001128	-0.206455	9.38626	7.39786	0.00653017	0.0304516
FBgn0001133	0.00995928	5.0513	0.0223881	0.881059	0.935149
FBgn0001134	-0.601457	0.520533	14.5562	0.000136043	0.00141692
FBgn0001137	0.408983	5.1205	38.4526	5.61002e-10	4.42116e-08
FBgn0001138	-0.0608109	0.851274	0.132305	0.716054	0.831397
FBgn0001139	0.14429	7.69416	7.46497	0.0062911	0.0295788
FBgn0001142	0.0269813	7.14735	0.124775	0.723912	0.835596
FBgn0001145	0.100679	9.7809	3.46134	0.0628196	0.164795
FBgn0001149	0.0399194	8.30447	0.238383	0.625377	0.770236
FBgn0001150	-0.373817	3.40867	11.9763	0.000538811	0.0042534
FBgn0001168	-0.104783	6.71961	1.77143	0.183206	0.348887
FBgn0001169	0.00495329	6.98388	0.0057239	0.939692	0.969423
FBgn0001170	-0.411524	0.0906175	3.01381	0.0825578	0.201224
FBgn0001179	0.0465503	5.14056	0.486254	0.485603	0.658448
FBgn0001180	-0.138653	5.18238	1.78149	0.181967	0.347576
FBgn0001185	-0.0679512	4.85768	1.07619	0.29955	0.483256
FBgn0001186	-0.169514	8.72009	18.0636	2.13647e-05	0.000319967
FBgn0001187	0.0812727	6.92357	0.883298	0.3473	0.5293
FBgn0001189	-0.114425	5.94885	7.67528	0.00559824	0.0270115
FBgn0001197	-0.0336147	7.82394	0.418171	0.517851	0.686854
FBgn0001202	0.124406	5.46072	7.932	0.0048568	0.0242507
FBgn0001208	0.393217	7.81128	17.6455	2.6615e-05	0.000378884
FBgn0001215	-0.158354	8.67751	11.3184	0.000767437	0.00565678
FBgn0001216	-0.166761	7.59519	8.09982	0.00442698	0.022618
FBgn0001217	-0.0816515	7.19478	1.84352	0.174539	0.338535
FBgn0001218	-0.204846	9.83251	12.3601	0.000438598	0.00362755
FBgn0001219	-0.0180291	11.5551	0.216035	0.642078	0.781991
FBgn0001220	-0.0385272	8.90813	1.18374	0.276595	0.459922
FBgn0001222	0.0881224	6.73056	2.8665	0.0904413	0.213384
FBgn0001223	0.888927	5.60851	3.82726	0.0504254	0.140754
FBgn0001224	-0.38487	4.21311	14.3819	0.000149228	0.00152898
FBgn0001225	-0.315083	8.65305	10.4422	0.00123167	0.00820006
FBgn0001226	-0.0920135	7.93719	1.34863	0.245518	0.422695
FBgn0001227	-0.0166019	2.61008	0.0272038	0.868995	0.927549
FBgn0001229	-0.218984	1.0923	2.57473	0.108583	0.242128
FBgn0001233	0.103285	10.7671	4.71378	0.0299218	0.0954368
FBgn0001235	-0.0737814	6.39603	0.462035	0.496674	0.668334
FBgn0001247	0.0374864	6.84894	0.809786	0.368183	0.550152
FBgn0001248	0.164001	8.87448	9.46711	0.00209189	0.0126087
FBgn0001250	-0.0204485	7.01178	0.10949	0.740725	0.845815
FBgn0001253	0.244503	2.50161	1.17366	0.27865	0.461536
FBgn0001257	0.440939	5.1757	21.3558	3.81472e-06	7.96376e-05
FBgn0001258	0.471476	5.51824	31.8853	1.63548e-08	7.93167e-07
FBgn0001259	-0.458569	1.08344	10.6093	0.0011252	0.00765369
FBgn0001263	0.273622	6.34796	18.836	1.42453e-05	0.000231076
FBgn0001269	-0.136321	1.67297	1.33954	0.247114	0.425057
FBgn0001276	0.149317	3.22788	1.61493	0.203801	0.375554
FBgn0001280	-0.0273117	5.36331	0.228659	0.63252	0.774767
FBgn0001281	-0.0389356	7.33051	0.101292	0.750285	0.852203
FBgn0001285	0.0203945	5.3565	0.00661226	0.935191	0.96713
FBgn0001291	-0.0391465	5.63986	0.392295	0.531095	0.696708
FBgn0001296	-0.0687598	6.11472	1.2572	0.262182	0.442996
FBgn0001297	-0.0958399	8.64663	2.89714	0.0887368	0.210586
FBgn0001301	-0.234518	6.66822	13.8829	0.000194557	0.00190469
FBgn0001308	0.0704077	7.83269	3.13384	0.0766831	0.191445
FBgn0001311	-0.250178	2.22094	2.60243	0.1067	0.239285
FBgn0001316	0.00393164	8.1931	0.00754104	0.930799	0.965316
FBgn0001319	0.164165	1.08268	0.951407	0.329361	0.510953
FBgn0001320	-0.0292371	3.14949	0.151743	0.696875	0.819355
FBgn0001321	0.1326	1.4359	0.5905	0.442226	0.620494
FBgn0001323	0.284793	3.48739	10.124	0.00146352	0.00944098
FBgn0001324	-0.197167	6.75247	13.7003	0.000214418	0.00205446
FBgn0001330	0.166507	4.87068	3.26718	0.0706791	0.179971
FBgn0001332	0.269186	6.65503	24.2415	8.49815e-07	2.21397e-05
FBgn0001337	0.0820937	6.70304	2.85083	0.0913269	0.215036
FBgn0001341	0.185531	6.08064	9.00567	0.00269144	0.0154447
FBgn0001404	0.104224	7.54815	4.63859	0.0312606	0.098511
FBgn0001491	0.180047	5.25299	5.25264	0.0219135	0.0762457
FBgn0001565	-0.173581	6.67026	10.6621	0.00109355	0.00749619
FBgn0001624	-0.271462	7.40112	20.7947	5.11254e-06	0.000100938
FBgn0001941	-0.0584448	6.17828	1.03391	0.309241	0.492432
FBgn0001942	0.0709489	10.6796	2.90742	0.0881728	0.209826
FBgn0001961	-0.0410437	6.9394	0.865392	0.352234	0.534598
FBgn0001965	0.0446811	6.41665	0.968254	0.325116	0.506277
FBgn0001970	-0.0292504	4.74191	0.140533	0.707752	0.825538
FBgn0001974	0.163636	4.95881	4.87481	0.0272514	0.0892678
FBgn0001977	0.0784657	5.59105	1.64155	0.200113	0.370275
FBgn0001978	0.010313	7.71465	0.044888	0.83221	0.905142
FBgn0001981	-0.094079	2.24691	0.666202	0.414379	0.594295
FBgn0001990	-0.0635356	4.9476	0.65985	0.416613	0.596684
FBgn0001991	-0.304	6.80663	16.2999	5.40656e-05	0.000674537
FBgn0001994	0.209849	7.13678	17.8697	2.36556e-05	0.000344701
FBgn0001995	-0.131163	4.94829	2.64962	0.103575	0.234669
FBgn0002021	0.0523955	5.22395	1.03176	0.309746	0.492674
FBgn0002022	0.048905	6.27709	1.30328	0.253616	0.43301
FBgn0002023	0.14172	3.67442	3.54253	0.0598142	0.158805
FBgn0002031	0.0669123	7.31579	1.82615	0.176584	0.341015
FBgn0002036	-0.0640261	6.90972	2.2143	0.136738	0.285774
FBgn0002044	-0.0235041	7.3755	0.244036	0.621306	0.767563
FBgn0002069	-0.0317531	7.3623	0.566378	0.451702	0.62792
FBgn0002121	0.234787	7.81948	10.239	0.00137505	0.00897654
FBgn0002174	0.0644937	6.65474	1.58459	0.208101	0.381102
FBgn0002183	-0.200113	7.60629	18.7093	1.52236e-05	0.000242677
FBgn0002283	-0.0852091	5.91496	2.13959	0.14354	0.295354
FBgn0002284	0.236424	6.88472	16.9523	3.83302e-05	0.00050884
FBgn0002306	-0.231938	5.39316	11.9612	0.000543197	0.00428003
FBgn0002354	-0.0241673	3.88913	0.110423	0.739663	0.845237
FBgn0002413	-0.0429444	7.12902	0.450266	0.502209	0.673768
FBgn0002431	-0.177797	8.77851	7.59439	0.00585502	0.0278947
FBgn0002441	-0.237672	6.69526	22.3979	2.21619e-06	5.12434e-05
FBgn0002466	-0.285156	5.91568	14.118	0.000171692	0.00171456
FBgn0002521	0.0814372	6.95845	1.45231	0.228158	0.404821
FBgn0002522	-0.360877	2.33406	8.61034	0.00334259	0.0181567
FBgn0002524	-0.0453927	6.60319	0.864748	0.352413	0.534656
FBgn0002525	-0.0975119	7.28701	4.23304	0.0396443	0.118121
FBgn0002526	-0.0823987	7.17466	0.785158	0.375568	0.557915
FBgn0002528	-0.195615	6.05087	6.74655	0.00939293	0.0401941
FBgn0002542	-0.0217969	7.41979	0.155079	0.693728	0.817318
FBgn0002543	0.0482286	4.37545	0.100026	0.751798	0.852907
FBgn0002552	0.0684992	5.68667	0.900447	0.342662	0.525041
FBgn0002564	-0.255832	0.574235	1.00213	0.316796	0.499324
FBgn0002565	1.15123	8.09013	3.78183	0.051812	0.143607
FBgn0002567	-0.137491	7.57806	6.6548	0.00988892	0.0417498
FBgn0002569	0.0568851	5.54211	0.182006	0.669655	0.802144
FBgn0002570	0.118265	10.4488	0.680936	0.409264	0.589373
FBgn0002571	0.0517609	6.31799	0.206861	0.649239	0.786504
FBgn0002573	0.266059	1.26747	2.78765	0.0949932	0.221323
FBgn0002576	-0.199975	0.681909	1.03303	0.309447	0.492502
FBgn0002577	-0.127017	1.46141	0.742202	0.388956	0.571699
FBgn0002578	0.107859	4.71729	1.47732	0.224194	0.400039
FBgn0002579	0.227731	9.35231	9.83471	0.0017125	0.0107651
FBgn0002590	0.216015	9.47314	21.4361	3.65821e-06	7.70505e-05
FBgn0002592	0.207248	0.238388	0.867883	0.351542	0.53389
FBgn0002593	0.100133	10.0924	2.20267	0.137772	0.287491
FBgn0002607	0.163919	10.7819	12.2903	0.000455309	0.00374748
FBgn0002609	0.162853	2.06142	1.2256	0.268265	0.450059
FBgn0002622	0.143063	10.2068	7.05143	0.0079202	0.0354646
FBgn0002626	0.227729	9.8976	22.4242	2.18604e-06	5.09196e-05
FBgn0002638	-0.12398	7.55576	3.90088	0.0482607	0.136331
FBgn0002641	0.0688422	4.96266	0.67659	0.410763	0.590722
FBgn0002643	0.0103833	6.70493	0.0294002	0.863858	0.924362
FBgn0002645	-0.184206	8.01053	8.45072	0.00364899	0.0195405
FBgn0002652	0.489896	4.30504	19.7736	8.71771e-06	0.000154034
FBgn0002673	-0.0622219	6.22833	0.785166	0.375566	0.557915
FBgn0002707	0.441316	4.37338	18.6268	1.5897e-05	0.000251401
FBgn0002709	-0.123766	6.75428	3.19209	0.0739954	0.185962
FBgn0002715	0.0324717	5.75326	0.206014	0.64991	0.786864
FBgn0002716	0.0769138	0.824745	0.127587	0.720947	0.834042
FBgn0002719	0.569357	8.98781	68.2283	1.45617e-16	7.2479e-14
FBgn0002723	-0.00570769	5.19003	0.00922525	0.923482	0.96119
FBgn0002733	0.217903	2.08906	2.20387	0.137665	0.287331
FBgn0002736	-0.0205125	5.19665	0.086854	0.768215	0.86406
FBgn0002772	-0.460068	9.15185	18.4662	1.72945e-05	0.000269004
FBgn0002773	-0.753076	9.75211	39.1278	3.96943e-10	3.26425e-08
FBgn0002774	-0.053984	6.09407	0.84705	0.357388	0.539132
FBgn0002775	-0.0916786	4.55278	1.41611	0.234045	0.41049
FBgn0002778	0.288549	6.23645	22.7282	1.86613e-06	4.42307e-05
FBgn0002780	0.213214	8.40013	14.811	0.000118843	0.00127426
FBgn0002781	-0.0108047	8.27902	0.0382228	0.844997	0.912334
FBgn0002783	0.0908284	7.54818	2.98247	0.084171	0.203374
FBgn0002787	0.0781782	7.21274	2.48761	0.114746	0.251833
FBgn0002789	-0.119335	8.02513	5.08222	0.0241723	0.081876
FBgn0002791	-0.204501	5.10857	10.768	0.0010327	0.0071955
FBgn0002868	0.143038	9.4483	1.4993	0.22078	0.395888
FBgn0002869	-0.95101	3.22479	9.88845	0.0016632	0.0104859
FBgn0002872	-0.190945	6.3407	12.4416	0.00041987	0.0035046
FBgn0002878	-0.136794	5.80092	2.42103	0.119716	0.259966
FBgn0002887	0.0291302	5.62368	0.165415	0.684219	0.811629
FBgn0002891	0.0255588	5.25018	0.0862458	0.769005	0.864155
FBgn0002899	-0.583307	4.797	14.7286	0.000124147	0.00131769
FBgn0002901	-0.0410683	4.35789	0.15261	0.696053	0.81883
FBgn0002909	-0.0112062	5.37755	0.0239506	0.877011	0.93263
FBgn0002914	-0.144331	7.34707	10.8187	0.00100479	0.00703697
FBgn0002917	-0.11635	4.72407	3.25503	0.0712045	0.180968
FBgn0002921	-0.0932889	11.2361	3.73285	0.0533521	0.146672
FBgn0002922	-0.125813	1.9866	1.03756	0.308389	0.491811
FBgn0002924	-0.00960659	6.01592	0.0148241	0.903094	0.949251
FBgn0002926	0.100401	4.80668	0.188227	0.664397	0.797579
FBgn0002930	0.375435	6.92263	32.4155	1.2449e-08	6.39837e-07
FBgn0002931	-0.0141519	3.06487	0.0189148	0.890611	0.940117
FBgn0002932	-0.0273228	5.95978	0.197609	0.656657	0.792194
FBgn0002936	0.0351836	3.05696	0.0538255	0.816535	0.894967
FBgn0002937	-0.166001	4.07035	2.75559	0.0969152	0.224364
FBgn0002938	-0.0788696	9.03263	1.30909	0.25256	0.431676
FBgn0002939	-0.540631	5.68257	6.38428	0.0115136	0.0469935
FBgn0002940	0.166348	12.0538	7.05798	0.00789128	0.0353686
FBgn0002941	-0.45083	0.984741	8.73019	0.00312984	0.0172714
FBgn0002945	0.192427	4.46626	2.91938	0.0875217	0.208802
FBgn0002948	-0.334863	5.42788	10.3916	0.0012659	0.0083835
FBgn0002962	-0.269943	6.63399	1.95509	0.16204	0.321529
FBgn0002973	0.107185	6.91831	5.9029	0.015116	0.0572723
FBgn0002985	-0.122593	3.98313	1.67292	0.195868	0.36463
FBgn0002989	-0.255425	4.74538	7.59135	0.00586491	0.0279277
FBgn0003002	-0.0468082	1.09682	0.0864368	0.768757	0.864155
FBgn0003008	0.00990259	4.02915	0.0175317	0.894662	0.942674
FBgn0003011	-0.172874	1.639	1.3848	0.239285	0.415978
FBgn0003016	-0.157099	6.94073	12.2072	0.000476055	0.0038744
FBgn0003022	-0.387292	6.32279	28.8764	7.71463e-08	2.95373e-06
FBgn0003023	-0.290867	7.10494	14.7829	0.000120623	0.00129042
FBgn0003028	-0.357131	7.84181	24.8541	6.18365e-07	1.69996e-05
FBgn0003041	0.0777076	6.67467	1.67711	0.195309	0.364092
FBgn0003042	0.00783504	4.3507	0.00957836	0.922036	0.960355
FBgn0003044	-0.226229	7.10407	16.3821	5.17718e-05	0.000651938
FBgn0003048	0.130337	6.73853	3.79107	0.0515267	0.142983
FBgn0003053	0.102926	6.07958	1.82306	0.176949	0.341336
FBgn0003062	0.235361	6.10121	9.53009	0.0020213	0.0122457
FBgn0003067	1.16643	9.08591	23.1141	1.52667e-06	3.73067e-05
FBgn0003068	0.366751	6.0795	17.944	2.27496e-05	0.000335637
FBgn0003071	-0.216595	8.81	16.0714	6.09995e-05	0.000740301
FBgn0003074	-0.10593	9.4219	5.11262	0.0237525	0.0809176
FBgn0003076	-0.00792077	8.50161	0.0140314	0.905708	0.950958
FBgn0003079	0.060382	5.83621	1.01527	0.313642	0.496421
FBgn0003082	-0.166313	4.04763	1.88155	0.170158	0.332446
FBgn0003087	0.052394	5.54866	0.213705	0.643879	0.783172
FBgn0003089	-0.372864	1.22167	1.78037	0.182104	0.347658
FBgn0003090	-0.135242	3.42901	2.17727	0.140063	0.290619
FBgn0003091	-0.0289843	5.62369	0.198838	0.655661	0.79156
FBgn0003093	-0.084007	7.01485	2.79516	0.0945493	0.220615
FBgn0003116	0.174271	4.54869	7.1875	0.00734134	0.0333623
FBgn0003117	0.0902182	1.92439	0.603227	0.43735	0.616286
FBgn0003118	0.0995891	4.35767	1.93746	0.163945	0.324221
FBgn0003124	-0.152854	7.89617	8.77487	0.00305408	0.0169399
FBgn0003129	0.220172	1.8028	3.02152	0.0821665	0.2005
FBgn0003134	0.198604	7.26932	14.744	0.000123139	0.00130993
FBgn0003138	-0.0586527	7.6413	2.01678	0.155568	0.312006
FBgn0003139	-0.00485036	5.91978	0.00816026	0.928022	0.963687
FBgn0003141	-0.141112	5.45059	5.96344	0.0146055	0.0558435
FBgn0003149	-0.404096	9.7932	35.3563	2.74574e-09	1.66452e-07
FBgn0003159	0.0079859	7.83601	0.0201808	0.887033	0.93865
FBgn0003162	0.117924	6.14021	2.81635	0.0933084	0.218518
FBgn0003169	-0.0130183	6.38631	0.0702779	0.790933	0.878819
FBgn0003174	-0.47827	1.28292	10.633	0.00111085	0.00759052
FBgn0003175	0.0141887	6.96812	0.055029	0.814533	0.893416
FBgn0003178	-0.0335337	10.3043	0.280808	0.596172	0.748938
FBgn0003189	-0.02944	6.54267	0.200741	0.654123	0.790448
FBgn0003204	0.0451537	7.42954	0.997771	0.317851	0.500402
FBgn0003205	0.0806951	6.9329	2.90487	0.0883121	0.210052
FBgn0003206	-0.156083	5.93882	9.23981	0.00236809	0.0139891
FBgn0003209	-0.0394239	6.87242	0.543026	0.461181	0.636472
FBgn0003210	-0.0152442	6.74093	0.0933129	0.760007	0.858175
FBgn0003218	-0.191337	7.61993	20.6502	5.51316e-06	0.00010595
FBgn0003227	-0.160341	3.26133	0.966047	0.325668	0.506593
FBgn0003231	0.212534	9.14808	25.7651	3.8559e-07	1.13954e-05
FBgn0003248	0.0731587	4.70543	0.94846	0.330112	0.511697
FBgn0003249	-0.00119392	6.62244	0.000385205	0.984341	0.991764
FBgn0003250	0.16707	6.97581	5.40112	0.0201239	0.0713312
FBgn0003254	-0.133915	3.01134	2.3498	0.125299	0.268575
FBgn0003255	0.234136	1.36275	2.74705	0.097434	0.225234
FBgn0003257	0.0955862	5.64743	1.22718	0.267957	0.449622
FBgn0003261	0.129964	10.0511	11.391	0.000737993	0.00551478
FBgn0003268	-0.0980145	6.25927	1.83316	0.175755	0.340305
FBgn0003274	0.118376	9.00913	3.27741	0.0702395	0.179093
FBgn0003275	-0.022995	5.2809	0.117008	0.732303	0.840589
FBgn0003277	0.130241	7.68621	4.97065	0.025781	0.0857266
FBgn0003278	-0.0216619	5.28737	0.064796	0.79907	0.884645
FBgn0003279	0.144864	10.8062	8.1205	0.00437675	0.0224098
FBgn0003285	-0.36597	2.86612	7.94305	0.00482724	0.0241158
FBgn0003292	-0.0912159	4.4219	0.526871	0.467926	0.642353
FBgn0003295	-0.252512	0.995534	2.77774	0.095583	0.222478
FBgn0003301	-0.312279	6.93212	31.9401	1.58998e-08	7.75074e-07
FBgn0003302	-0.0460737	4.64995	0.353063	0.552384	0.71494
FBgn0003308	0.339644	5.10931	12.5527	0.000395631	0.00333763
FBgn0003310	-0.0703445	6.41165	2.02192	0.155043	0.311503
FBgn0003317	0.111751	5.85129	3.91264	0.0479242	0.135694
FBgn0003321	-0.0250775	6.81032	0.40687	0.523563	0.691214
FBgn0003326	0.121273	4.6615	1.33992	0.247047	0.425057
FBgn0003328	0.241249	5.81941	13.0485	0.000303523	0.00269523
FBgn0003330	-0.155517	4.78683	4.55999	0.0327273	0.102011
FBgn0003334	0.0529701	6.84022	0.996493	0.31816	0.500691
FBgn0003339	0.0608632	2.63581	0.308039	0.578886	0.735626
FBgn0003345	-0.108412	6.74461	4.71768	0.029854	0.0953111
FBgn0003346	-0.148693	6.29675	8.12983	0.00435429	0.0223383
FBgn0003353	0.126745	3.83129	2.4487	0.117622	0.256539
FBgn0003358	0.0562881	6.36015	0.108182	0.742224	0.846606
FBgn0003360	-0.306542	10.9739	19.6071	9.51134e-06	0.000163543
FBgn0003366	-0.0859913	6.2366	1.39313	0.237876	0.414367
FBgn0003371	0.148204	8.87837	8.52122	0.0035103	0.0189048
FBgn0003380	-0.368544	6.19966	4.99309	0.0254487	0.085065
FBgn0003386	-0.122499	3.64952	1.5994	0.205988	0.378553
FBgn0003388	-0.052361	1.14544	0.0595556	0.8072	0.88841
FBgn0003390	-0.22034	4.99682	8.90567	0.00284287	0.0160892
FBgn0003391	-0.0388531	7.03353	0.63551	0.425341	0.604607
FBgn0003392	-0.11697	8.33622	9.79414	0.00175069	0.0109282
FBgn0003396	0.0478879	7.12303	0.282012	0.595385	0.748393
FBgn0003401	-0.397385	5.06373	12.2877	0.000455943	0.00374944
FBgn0003410	-0.0701705	5.27996	0.798646	0.371498	0.553793
FBgn0003415	0.142141	7.77547	2.99336	0.0836063	0.202703
FBgn0003416	0.00320056	5.8778	0.00249328	0.960176	0.979651
FBgn0003423	-0.114818	8.13727	13.4758	0.000241661	0.00224988
FBgn0003429	-0.261174	7.45324	10.0485	0.0015247	0.00975578
FBgn0003430	0.149663	1.37465	0.927848	0.335423	0.517301
FBgn0003435	-0.0264705	9.20018	0.117306	0.731974	0.840389
FBgn0003444	0.122053	5.03681	2.24338	0.134188	0.282476
FBgn0003447	-0.0856115	6.88245	1.91262	0.166673	0.327935
FBgn0003449	0.0256252	5.66545	0.179784	0.671559	0.803398
FBgn0003450	-0.0592188	2.23507	0.0368063	0.84786	0.914173
FBgn0003459	0.0241741	5.80647	0.139086	0.709191	0.826364
FBgn0003460	-0.0138287	3.40486	0.0253299	0.873548	0.930204
FBgn0003462	0.219787	9.12307	21.0709	4.4261e-06	8.92486e-05
FBgn0003463	-0.161865	6.41568	6.15493	0.0131047	0.051724
FBgn0003464	0.0596826	7.77762	1.44814	0.228826	0.405321
FBgn0003475	0.00247158	7.99185	0.00357569	0.952317	0.975266
FBgn0003479	0.0121625	4.06054	0.0197849	0.888139	0.93865
FBgn0003480	-0.225515	3.28981	1.88132	0.170185	0.332446
FBgn0003483	-0.189374	6.2778	5.1624	0.0230809	0.0792291
FBgn0003495	0.238477	6.17401	12.88	0.000332109	0.00288476
FBgn0003499	-0.402146	4.06705	19.8388	8.42535e-06	0.000151193
FBgn0003502	-0.00841503	6.93076	0.0221316	0.881738	0.935449
FBgn0003507	0.328836	6.04142	15.1331	0.000100193	0.00110951
FBgn0003510	-0.491445	2.66152	16.211	5.66643e-05	0.000699575
FBgn0003511	-0.143863	3.15401	1.28555	0.256869	0.436908
FBgn0003512	-0.338125	4.38381	18.8042	1.4485e-05	0.000234563
FBgn0003513	-0.0333815	1.89961	0.0631693	0.801555	0.886171
FBgn0003514	0.0319786	7.1297	0.737017	0.390618	0.573521
FBgn0003515	-0.0614942	4.37165	0.657925	0.417293	0.597117
FBgn0003517	0.0812879	10.6147	2.29914	0.129445	0.275093
FBgn0003520	-0.278853	7.97716	29.818	4.74575e-08	1.93451e-06
FBgn0003525	-0.153778	7.20065	1.03919	0.308011	0.491373
FBgn0003527	-0.0716961	3.62399	0.700063	0.402762	0.583564
FBgn0003545	-0.0217612	6.13831	0.108538	0.741815	0.846606
FBgn0003557	0.0302932	7.51179	0.521836	0.47006	0.644495
FBgn0003559	-0.0740129	5.41229	2.25065	0.133558	0.281368
FBgn0003567	-0.283936	6.64539	21.307	3.91297e-06	8.09076e-05
FBgn0003575	-0.077904	6.64658	2.10429	0.146887	0.300214
FBgn0003598	-0.116801	7.33225	3.29241	0.0696008	0.17814
FBgn0003607	-0.049527	6.99968	1.09959	0.294355	0.478269
FBgn0003612	-0.0225732	7.59058	0.19479	0.65896	0.793655
FBgn0003638	-0.0658719	7.86689	2.89994	0.0885828	0.210484
FBgn0003651	0.100649	6.05738	2.56395	0.109325	0.24321
FBgn0003654	-0.109277	4.60039	2.6513	0.103465	0.234533
FBgn0003655	0.0948839	7.1168	0.234604	0.628131	0.771567
FBgn0003656	0.177431	7.83826	20.8399	4.99327e-06	9.87895e-05
FBgn0003660	0.201045	7.04182	18.0252	2.18004e-05	0.000324671
FBgn0003676	0.00956367	7.68008	0.0377904	0.845865	0.912854
FBgn0003687	-0.0010594	5.05848	0.000143813	0.990432	0.994698
FBgn0003701	-0.119066	6.10352	1.22069	0.269224	0.450869
FBgn0003710	-0.128355	2.35475	1.84344	0.174548	0.338535
FBgn0003714	0.0560073	4.32062	0.574132	0.448622	0.626031
FBgn0003715	-0.050851	2.27679	0.130144	0.718283	0.832757
FBgn0003716	0.0792186	6.89266	2.89314	0.0889574	0.211003
FBgn0003721	-0.242997	9.59527	19.9289	8.03747e-06	0.000145614
FBgn0003731	0.272698	6.53669	34.6226	4.00234e-09	2.30793e-07
FBgn0003732	-0.00103027	8.02445	0.00042998	0.983456	0.991424
FBgn0003733	0.0473206	5.89269	0.160171	0.688999	0.814638
FBgn0003741	-0.0109681	3.98953	0.0199424	0.887698	0.93865
FBgn0003742	-0.0563928	4.80827	0.827347	0.363041	0.544792
FBgn0003744	0.0963154	6.68334	6.0972	0.0135396	0.052914
FBgn0003748	0.0773774	9.23933	3.30483	0.0690764	0.177612
FBgn0003861	-0.183213	8.79096	6.55264	0.0104729	0.0436412
FBgn0003862	-0.118267	7.33852	1.39858	0.236962	0.413786
FBgn0003863	0.363235	11.2935	21.0025	4.58673e-06	9.18998e-05
FBgn0003866	0.0562223	4.04498	0.677592	0.410417	0.590404
FBgn0003867	0.241724	5.1734	5.01215	0.02517	0.0843788
FBgn0003870	-0.0114316	7.11087	0.0623738	0.802783	0.886367
FBgn0003882	-0.0147789	5.70821	0.0556746	0.813468	0.892514
FBgn0003884	0.0371942	10.3395	0.858027	0.354291	0.536257
FBgn0003885	0.0850548	8.47567	2.42352	0.119526	0.259708
FBgn0003886	-0.148879	4.27559	2.29199	0.130043	0.275867
FBgn0003887	0.0465145	9.92369	0.686861	0.407234	0.587702
FBgn0003888	0.168779	5.25875	3.79948	0.0512684	0.142685
FBgn0003889	-0.0182743	8.90213	0.0770589	0.781323	0.872758
FBgn0003890	0.268097	6.54605	19.8797	8.24735e-06	0.000148562
FBgn0003891	0.130624	8.77106	2.32617	0.127214	0.271327
FBgn0003892	0.0258648	4.39075	0.109547	0.740661	0.845815
FBgn0003896	-0.0205978	2.48221	0.0461547	0.829895	0.903881
FBgn0003900	-0.481831	0.810375	9.91577	0.00163868	0.0103798
FBgn0003941	0.0491748	9.90188	0.994161	0.318727	0.501198
FBgn0003942	0.0822168	10.3524	2.61259	0.106019	0.238152
FBgn0003961	2.18817	3.90724	25.2589	5.01286e-07	1.42791e-05
FBgn0003963	0.179784	4.9423	2.92968	0.0869649	0.207789
FBgn0003964	0.0991066	6.64424	4.32067	0.0376521	0.113653
FBgn0003965	0.327275	4.74839	17.7381	2.53497e-05	0.000364335
FBgn0003969	0.0483647	6.10267	0.86211	0.353149	0.535385
FBgn0003975	-0.15056	3.451	2.18346	0.139501	0.29001
FBgn0003977	-0.0472336	5.5392	0.537227	0.463584	0.638716
FBgn0003978	-0.0465269	4.95474	0.322904	0.569868	0.728847
FBgn0003984	-0.240307	4.38638	7.82001	0.0051671	0.0255171
FBgn0003996	-0.0282204	4.26473	0.125325	0.72333	0.835593
FBgn0003997	-0.0589874	4.21115	0.324852	0.568706	0.727578
FBgn0004003	-0.271053	4.43879	5.64074	0.0175478	0.0642219
FBgn0004009	0.229204	1.93213	3.19727	0.0737613	0.185571
FBgn0004028	-0.41866	9.31079	29.6612	5.14555e-08	2.05323e-06
FBgn0004047	-0.184603	11.2967	0.546358	0.45981	0.635177
FBgn0004049	-0.0937974	6.57804	3.08984	0.0787824	0.19505
FBgn0004050	0.0167879	5.81298	0.0746664	0.78466	0.875372
FBgn0004055	0.0389148	6.73809	0.442125	0.506099	0.676778
FBgn0004057	0.338969	7.55068	31.2459	2.27327e-08	1.04391e-06
FBgn0004066	0.21865	7.19373	20.0045	7.726e-06	0.000141324
FBgn0004087	0.200383	2.99784	1.71951	0.189756	0.356905
FBgn0004101	-0.123354	5.05639	3.12036	0.0773197	0.192779
FBgn0004102	-0.0765426	1.1394	0.291651	0.589164	0.743848
FBgn0004103	-0.0362593	6.99207	0.76913	0.380486	0.56214
FBgn0004106	-0.0709488	5.9519	0.681929	0.408923	0.589046
FBgn0004107	-0.0370674	5.45431	0.106335	0.744356	0.847709
FBgn0004108	-0.179288	5.04314	7.04259	0.00795936	0.0355889
FBgn0004117	-0.328704	9.55611	17.553	2.79411e-05	0.000393212
FBgn0004118	0.0106737	3.28307	0.0214981	0.88343	0.936614
FBgn0004132	-0.0644207	4.79191	0.598717	0.439068	0.617896
FBgn0004133	-0.0493614	5.68995	0.789	0.374403	0.557156
FBgn0004167	-0.0881645	9.08422	1.10771	0.29258	0.476318
FBgn0004168	-0.0538674	2.50183	0.122175	0.726688	0.836655
FBgn0004169	-0.389278	9.86584	28.1597	1.11707e-07	4.07883e-06
FBgn0004177	0.0710888	8.72504	2.05086	0.152121	0.307591
FBgn0004179	-0.00138818	6.7273	0.0011136	0.973379	0.98682
FBgn0004197	-0.0332087	2.09473	0.120265	0.728747	0.837905
FBgn0004198	0.0383537	5.48457	0.128434	0.720061	0.833679
FBgn0004227	-0.112603	6.97516	6.22621	0.0125873	0.050227
FBgn0004228	-0.0608677	5.212	0.365937	0.545227	0.707785
FBgn0004237	0.0923914	7.64339	5.09217	0.0240342	0.0815361
FBgn0004242	-0.301191	8.45228	9.03463	0.00264912	0.0152947
FBgn0004244	-0.431696	4.78996	6.55065	0.0104846	0.0436412
FBgn0004359	0.238068	5.09349	11.5641	0.000672364	0.00510727
FBgn0004360	0.418337	1.86204	11.6231	0.000651366	0.00499187
FBgn0004362	0.030045	9.04049	0.198165	0.656206	0.791953
FBgn0004363	-0.1421	10.1674	5.81173	0.0159196	0.0597077
FBgn0004364	-0.082138	5.68402	2.27493	0.131481	0.278066
FBgn0004366	-0.168166	5.26917	6.97319	0.00827401	0.0366155
FBgn0004367	-0.377583	3.85886	11.0599	0.000882157	0.00632012
FBgn0004368	-0.210734	6.69815	12.3702	0.000436242	0.00361256
FBgn0004369	-0.222137	6.26509	10.7267	0.00105601	0.00731628
FBgn0004370	-0.0344856	6.25612	0.260313	0.609905	0.760014
FBgn0004373	-0.0191779	7.96844	0.15823	0.690791	0.815786
FBgn0004374	0.0175427	5.97605	0.0941422	0.758976	0.857748
FBgn0004378	-0.167665	6.05396	2.93279	0.0867974	0.207651
FBgn0004379	-0.0225765	6.56219	0.146573	0.701832	0.8226
FBgn0004380	0.00980274	4.75619	0.0138674	0.906258	0.951219
FBgn0004381	-0.126022	5.62624	4.85321	0.0275947	0.0901053
FBgn0004387	-0.0619031	6.72882	1.36439	0.242778	0.419943
FBgn0004390	-0.0872621	6.7862	2.07554	0.149677	0.30395
FBgn0004391	-0.0651129	6.44439	1.51506	0.218369	0.393205
FBgn0004394	0.0609291	1.32896	0.130254	0.718169	0.832727
FBgn0004395	0.109501	5.86409	2.25436	0.133239	0.280883
FBgn0004396	0.116849	5.82205	1.46696	0.225827	0.401808
FBgn0004397	-0.172898	7.27078	16.6737	4.43929e-05	0.000575101
FBgn0004400	-0.0685713	5.42332	0.445691	0.504388	0.675733
FBgn0004401	-0.0486351	8.59162	1.6373	0.200697	0.371064
FBgn0004406	-0.119606	4.86364	1.60462	0.20525	0.377709
FBgn0004407	-0.025996	3.92583	0.082656	0.77373	0.867579
FBgn0004419	0.0681795	9.92622	1.33783	0.247417	0.4255
FBgn0004432	0.246854	9.81506	22.1672	2.49912e-06	5.58727e-05
FBgn0004435	-0.00735761	8.04486	0.0185743	0.891594	0.940703
FBgn0004436	-0.111996	7.43804	4.74638	0.0293601	0.0940258
FBgn0004449	-0.203868	7.88944	8.5594	0.00343743	0.0185759
FBgn0004456	0.00396175	5.83486	0.00523137	0.942341	0.970511
FBgn0004462	-0.00953054	6.48993	0.0382434	0.844955	0.912334
FBgn0004463	-0.116911	4.90456	3.07392	0.0795575	0.196545
FBgn0004465	-0.00949484	5.83739	0.0414524	0.838667	0.9083
FBgn0004507	-0.446733	10.2248	40.6366	1.83342e-10	1.69987e-08
FBgn0004509	0.00201337	7.10965	0.00152062	0.968894	0.985145
FBgn0004510	-0.0515284	5.05042	0.436978	0.508585	0.678855
FBgn0004511	0.0146932	-0.200853	0.00273313	0.958306	0.978271
FBgn0004512	0.123348	7.10686	2.64461	0.103902	0.235184
FBgn0004513	-0.120254	4.45302	4.17192	0.0410993	0.121272
FBgn0004514	-0.279016	1.29401	4.83143	0.0279454	0.0908178
FBgn0004516	-0.104014	6.9948	3.72108	0.0537296	0.147153
FBgn0004552	0.040514	3.26431	0.203755	0.651707	0.788045
FBgn0004556	0.168007	4.68889	4.08094	0.0433696	0.126207
FBgn0004567	-0.0422785	0.382074	0.0543907	0.815592	0.894163
FBgn0004569	-0.269312	3.80996	11.4312	0.000722216	0.00542063
FBgn0004573	-0.190572	0.994615	1.52951	0.216186	0.39039
FBgn0004574	0.0710523	7.02849	3.2332	0.0721595	0.182707
FBgn0004575	-0.302466	6.61372	14.0147	0.000181388	0.00179434
FBgn0004577	-1.13713	0.510735	21.8394	2.96457e-06	6.47482e-05
FBgn0004580	-0.122295	6.47153	3.55583	0.0593367	0.157892
FBgn0004581	-0.0193778	5.25961	0.0945295	0.758496	0.857521
FBgn0004583	0.184264	6.20365	5.93363	0.0148546	0.0565313
FBgn0004584	-0.0248155	6.15146	0.139034	0.709243	0.826364
FBgn0004587	0.114149	7.9943	10.5239	0.00117843	0.00795459
FBgn0004595	0.137126	6.90341	0.932826	0.33413	0.515874
FBgn0004597	-0.23592	4.26155	11.3004	0.000774911	0.00570299
FBgn0004598	0.0964409	8.2738	4.58547	0.0322442	0.100856
FBgn0004606	0.163822	6.28851	5.93569	0.0148373	0.0565108
FBgn0004607	0.14408	5.05684	1.45317	0.22802	0.404651
FBgn0004611	0.0178302	6.94059	0.132034	0.716332	0.831515
FBgn0004618	-0.00338164	3.13717	0.00107202	0.973881	0.98682
FBgn0004619	-0.0438197	2.39044	0.165172	0.684439	0.811629
FBgn0004620	-0.363142	3.01454	10.9052	0.000958966	0.00679322
FBgn0004622	-0.162765	2.35536	2.59305	0.107333	0.240362
FBgn0004623	0.131738	7.19464	5.13183	0.023491	0.0800845
FBgn0004629	0.66905	8.05597	19.9817	7.81886e-06	0.000142747
FBgn0004635	-0.138442	3.97242	2.44243	0.118093	0.257329
FBgn0004636	0.010895	7.64436	0.0396629	0.842141	0.910767
FBgn0004638	-0.0171154	6.98267	0.140418	0.707866	0.825538
FBgn0004643	-0.0473665	6.24267	0.456481	0.499273	0.670971
FBgn0004644	0.027876	2.59758	0.0675936	0.794873	0.881566
FBgn0004646	-0.017765	6.94711	0.0882683	0.76639	0.862427
FBgn0004647	-0.194837	6.51821	7.54166	0.00602886	0.0285933
FBgn0004648	0.130031	8.04067	9.77184	0.00177205	0.0110179
FBgn0004649	-0.186248	9.9825	0.580205	0.446232	0.623893
FBgn0004650	-0.491768	6.87069	14.5694	0.000135093	0.00141013
FBgn0004652	0.182623	5.64382	8.82155	0.00297694	0.0166487
FBgn0004654	0.456227	7.91231	31.5428	1.9509e-08	9.16552e-07
FBgn0004655	-0.0491659	7.82504	0.934256	0.333759	0.515409
FBgn0004656	0.0468106	8.48148	0.45313	0.500852	0.67252
FBgn0004666	0.230273	4.21803	5.02737	0.0249498	0.0839084
FBgn0004687	0.109888	7.40677	6.77054	0.0092675	0.0398014
FBgn0004698	-0.0472821	7.28304	1.00653	0.315735	0.498233
FBgn0004784	-0.0335573	6.57725	0.250606	0.616649	0.763905
FBgn0004795	0.139151	7.65596	6.00065	0.0143006	0.0551554
FBgn0004797	-0.0201782	5.14786	0.0462028	0.829808	0.903881
FBgn0004811	-0.0302274	6.29664	0.242817	0.622179	0.768239
FBgn0004832	-0.105912	3.92763	1.57172	0.209958	0.38324
FBgn0004837	-0.0298733	5.31804	0.165439	0.684198	0.811629
FBgn0004838	0.0217646	10.1391	0.13319	0.715148	0.830684
FBgn0004839	0.0399549	2.24089	0.110686	0.739364	0.845077
FBgn0004852	0.168647	6.22397	9.28898	0.00230537	0.0137024
FBgn0004854	0.0814323	1.45331	0.33066	0.565271	0.724653
FBgn0004855	-0.0286259	3.963	0.101034	0.750592	0.852348
FBgn0004856	-0.000632615	6.4142	0.000142044	0.990491	0.994698
FBgn0004858	0.0833311	5.03856	2.02679	0.154547	0.310836
FBgn0004859	0.0998217	5.20388	1.30025	0.254168	0.433719
FBgn0004860	-0.112011	5.03827	2.27779	0.131239	0.277781
FBgn0004862	-0.324134	-0.0720853	2.19194	0.138734	0.288925
FBgn0004864	-0.00534162	6.68779	0.0110283	0.916363	0.95694
FBgn0004865	-0.222834	3.61424	8.32119	0.00391852	0.0205908
FBgn0004867	0.162874	10.1008	10.0531	0.00152094	0.00973832
FBgn0004868	0.0639485	8.5553	2.61265	0.106015	0.238152
FBgn0004870	0.0267858	0.176976	0.0173991	0.895059	0.942918
FBgn0004872	0.071706	6.46812	0.499544	0.479701	0.65255
FBgn0004875	-0.198205	8.22683	14.0412	0.000178846	0.00177476
FBgn0004880	-0.358437	5.30891	10.1416	0.00144959	0.00937033
FBgn0004882	-0.0575798	9.03167	1.53232	0.215765	0.389995
FBgn0004885	0.323348	6.26198	30.3491	3.60873e-08	1.53151e-06
FBgn0004888	-0.0894233	8.19363	2.49131	0.114476	0.251424
FBgn0004889	0.0894052	8.21467	3.93698	0.0472355	0.133945
FBgn0004892	0.241086	1.96902	3.90414	0.0481674	0.13622
FBgn0004893	0.0622618	5.03961	1.57533	0.209435	0.382656
FBgn0004901	-0.0424967	5.18039	0.230747	0.63097	0.77344
FBgn0004903	-0.115112	6.2945	6.45783	0.0110465	0.0454202
FBgn0004907	0.0213096	8.5985	0.437059	0.508545	0.678855
FBgn0004908	-0.00621121	3.21503	0.00758933	0.930579	0.965283
FBgn0004910	-0.147779	6.26816	4.10146	0.0428462	0.124991
FBgn0004913	-0.0498662	6.80381	0.367366	0.544443	0.707156
FBgn0004914	0.167806	7.29209	22.3063	2.3244e-06	5.30962e-05
FBgn0004915	0.0159628	5.64606	0.0953197	0.75752	0.856922
FBgn0004919	0.0264685	6.40301	0.125723	0.722908	0.835518
FBgn0004921	-0.192816	5.17746	9.46398	0.00209546	0.0126141
FBgn0004924	0.00986176	7.72659	0.0517667	0.820017	0.897247
FBgn0004926	0.051424	7.69067	1.60663	0.204966	0.37726
FBgn0004956	0.104796	4.56792	3.25128	0.0713675	0.181284
FBgn0004957	0.349694	3.67956	1.95173	0.162401	0.322153
FBgn0004959	-0.535948	0.637182	4.64636	0.0311195	0.0981316
FBgn0005198	-0.224875	6.70255	23.2456	1.42578e-06	3.51136e-05
FBgn0005278	0.340222	8.73821	46.4455	9.42043e-12	1.32969e-09
FBgn0005322	0.204523	5.90411	16.948	3.84181e-05	0.000508852
FBgn0005355	-0.109226	5.06141	2.58589	0.10782	0.241143
FBgn0005386	-0.214443	6.79929	11.7182	0.000618907	0.00477481
FBgn0005391	0.340836	11.3944	1.09239	0.295943	0.47981
FBgn0005410	-0.112019	7.68743	4.18533	0.0407752	0.120562
FBgn0005411	-0.193873	6.55802	18.7166	1.51655e-05	0.000242264
FBgn0005427	0.0518345	6.6268	1.02108	0.312263	0.49515
FBgn0005533	0.110561	9.47982	4.99851	0.0253691	0.084926
FBgn0005536	-0.140139	8.32213	8.81121	0.00299385	0.0167333
FBgn0005558	0.164536	3.18037	5.18178	0.0228249	0.0785879
FBgn0005561	-0.247709	3.10948	9.20983	0.00240718	0.0141925
FBgn0005564	-0.141842	3.7929	4.92349	0.0264939	0.0873882
FBgn0005585	-0.0986931	9.09455	2.97244	0.084694	0.20422
FBgn0005586	-0.137636	6.17001	5.97926	0.0144751	0.0556694
FBgn0005592	-0.0432993	2.96166	0.128363	0.720136	0.833679
FBgn0005593	0.118392	10.1896	6.76823	0.0092795	0.0398168
FBgn0005596	-0.266883	6.84433	12.462	0.000415324	0.00346972
FBgn0005612	0.163269	5.86693	5.38236	0.0203413	0.0718326
FBgn0005613	0.0671334	2.2211	0.0706746	0.790357	0.878722
FBgn0005614	-0.117198	8.60616	3.55621	0.059323	0.157892
FBgn0005616	-0.29088	4.19842	26.7824	2.27702e-07	7.25044e-06
FBgn0005617	-0.134506	7.07962	4.89512	0.0269327	0.0884077
FBgn0005619	0.161806	3.6819	4.2891	0.0383574	0.115121
FBgn0005624	0.0329285	4.54328	0.133161	0.715177	0.830684
FBgn0005626	0.0636091	5.82488	0.437072	0.508539	0.678855
FBgn0005630	-0.0026647	9.51816	0.00255312	0.959701	0.979272
FBgn0005631	-0.254992	5.032	16.6509	4.49284e-05	0.000581242
FBgn0005632	-0.0757713	8.82971	1.4887	0.222418	0.398071
FBgn0005633	-0.551473	7.28944	11.5823	0.000665822	0.00506979
FBgn0005636	0.199246	3.90144	4.16381	0.0412965	0.121702
FBgn0005638	-0.222586	2.95164	1.82844	0.176312	0.340833
FBgn0005640	0.0063044	6.8545	0.0212613	0.884069	0.937164
FBgn0005642	0.0297654	6.26654	0.216643	0.641609	0.781618
FBgn0005648	0.00487953	6.41028	0.00731215	0.931855	0.965759
FBgn0005649	0.106605	8.11633	6.25469	0.0123865	0.0496128
FBgn0005654	-0.114913	6.59378	4.24264	0.0394207	0.117603
FBgn0005655	0.0501413	6.74345	0.167911	0.681975	0.810256
FBgn0005658	0.122168	1.238	0.866463	0.351936	0.534334
FBgn0005659	0.248583	5.26287	19.7834	8.67343e-06	0.000153901
FBgn0005660	0.0999183	1.16237	0.314643	0.574845	0.732026
FBgn0005664	-0.117182	1.42513	0.152808	0.695866	0.818712
FBgn0005666	-0.371039	10.4865	5.77243	0.0162795	0.0607079
FBgn0005670	-0.0497858	3.18473	0.180124	0.671267	0.803261
FBgn0005671	-0.0436611	9.89327	2.02947	0.154274	0.310486
FBgn0005672	0.0652316	6.14988	1.74439	0.186583	0.353327
FBgn0005674	-0.0316811	7.51575	0.45392	0.500479	0.67221
FBgn0005677	0.07506	2.96506	0.777785	0.377819	0.559862
FBgn0005683	0.0952232	5.03973	1.36557	0.242574	0.419689
FBgn0005694	-0.113331	7.23522	6.19361	0.0128213	0.0509457
FBgn0005695	-0.0962858	7.01377	4.01087	0.0452078	0.129909
FBgn0005696	0.0381794	5.69813	0.270834	0.602773	0.754024
FBgn0005771	0.0516402	5.43966	0.903133	0.341943	0.524279
FBgn0005775	-0.192377	4.42744	9.09591	0.00256181	0.0148998
FBgn0005777	0.0772564	6.72084	2.45541	0.117121	0.255741
FBgn0008635	-0.0410554	7.3875	0.594329	0.44075	0.619445
FBgn0008636	0.276256	0.375994	2.2631	0.132489	0.279614
FBgn0008646	0.147053	1.0943	0.848959	0.356847	0.538809
FBgn0008651	0.0372338	1.29327	0.0718761	0.788625	0.877815
FBgn0008654	0.0394543	4.62174	0.214978	0.642894	0.782779
FBgn0010015	-0.314277	4.22591	16.7083	4.35895e-05	0.000567023
FBgn0010019	0.271881	13.4753	17.977	2.23588e-05	0.000330694
FBgn0010039	-0.12246	5.72123	1.91247	0.166689	0.327935
FBgn0010040	-0.396826	0.848597	3.52314	0.0605178	0.160358
FBgn0010041	-0.370829	3.18281	1.28031	0.257842	0.437619
FBgn0010043	-0.599159	1.35842	7.10862	0.00767139	0.0345519
FBgn0010051	0.0684638	7.30871	1.19386	0.274551	0.457602
FBgn0010052	0.614827	2.45221	8.44086	0.00366883	0.0196356
FBgn0010053	0.10271	6.92398	1.323	0.250054	0.428943
FBgn0010078	0.164341	9.49181	5.44759	0.0195953	0.0699559
FBgn0010105	0.071319	3.27747	0.932461	0.334224	0.515874
FBgn0010113	-0.143241	5.84036	2.81046	0.0936513	0.218898
FBgn0010114	0.0617072	6.73475	1.58769	0.207656	0.380509
FBgn0010173	0.110804	7.6054	5.8969	0.0151675	0.0573987
FBgn0010194	-0.262904	3.94774	8.0342	0.00459024	0.0232387
FBgn0010213	-0.267484	7.31721	12.2989	0.000453229	0.00373361
FBgn0010215	0.024546	7.27812	0.142128	0.706175	0.824978
FBgn0010217	-0.269417	11.4948	17.9355	2.28515e-05	0.000336492
FBgn0010220	-0.0865896	4.56423	1.59623	0.206438	0.378864
FBgn0010222	-0.188272	4.72614	1.52454	0.216934	0.391367
FBgn0010223	-0.176548	4.32528	3.62255	0.0570015	0.153274
FBgn0010225	0.242951	9.31119	11.4039	0.000732913	0.00548351
FBgn0010226	-0.175394	8.84082	5.69001	0.0170617	0.0628566
FBgn0010228	0.404768	6.90225	40.7046	1.77069e-10	1.67455e-08
FBgn0010235	0.0522345	6.7905	1.76656	0.183808	0.349894
FBgn0010238	0.156221	6.89501	10.8627	0.000981191	0.00689898
FBgn0010240	-0.0350076	3.27736	0.225651	0.634767	0.776513
FBgn0010241	-0.177023	6.69971	2.15468	0.142136	0.293298
FBgn0010246	-0.117899	7.32946	3.29468	0.0695047	0.178087
FBgn0010263	-0.123899	8.49306	3.05058	0.0807081	0.198524
FBgn0010265	0.115017	9.58799	6.13088	0.0132841	0.052236
FBgn0010269	0.0154376	5.90549	0.0722828	0.788042	0.877545
FBgn0010278	-0.128855	6.83267	4.86169	0.0274594	0.0897648
FBgn0010280	-0.073228	7.94425	3.20971	0.0732023	0.184606
FBgn0010282	0.0108361	6.3886	0.0348929	0.85182	0.916875
FBgn0010287	-0.146171	3.31724	1.91112	0.166839	0.328096
FBgn0010288	-0.0306291	7.44223	0.498268	0.480262	0.653126
FBgn0010292	0.151655	5.01704	4.11606	0.0424778	0.124408
FBgn0010300	-0.268144	7.58695	9.82343	0.00172303	0.0107983
FBgn0010303	-0.0483099	6.91929	0.818494	0.365621	0.547534
FBgn0010309	0.105054	4.67462	1.13857	0.285954	0.469328
FBgn0010313	0.127564	7.40908	4.07651	0.0434833	0.126413
FBgn0010314	0.113101	5.5711	2.16865	0.14085	0.291391
FBgn0010315	0.0764156	6.21939	1.11861	0.290218	0.474104
FBgn0010316	0.0659202	5.65168	1.08466	0.297657	0.481582
FBgn0010317	-0.00606463	5.06222	0.00220893	0.962514	0.981295
FBgn0010328	-0.0543082	8.41126	1.05567	0.304204	0.487396
FBgn0010333	-0.0833478	6.89913	4.3243	0.0375718	0.113513
FBgn0010339	0.104498	5.84873	3.29238	0.069602	0.17814
FBgn0010340	0.051222	4.10305	0.499613	0.47967	0.65255
FBgn0010341	0.194569	7.71874	20.0774	7.43698e-06	0.000137098
FBgn0010342	-0.161062	6.52454	3.69481	0.0545819	0.148541
FBgn0010348	0.0345724	9.00917	0.484608	0.486342	0.658931
FBgn0010350	0.109488	7.57891	8.96361	0.0027541	0.0157375
FBgn0010352	0.0200336	10.6422	0.163819	0.685664	0.812369
FBgn0010355	-0.157646	7.23568	10.3615	0.00128672	0.00849758
FBgn0010356	-0.0623457	4.78535	0.649873	0.420158	0.600307
FBgn0010379	0.13258	7.28269	7.79516	0.00523864	0.0257896
FBgn0010380	-0.0893237	7.09495	6.02207	0.0141281	0.0545789
FBgn0010381	0.464332	5.47409	2.0207	0.155167	0.311553
FBgn0010383	-0.0894079	4.78962	1.13976	0.285703	0.469079
FBgn0010385	2.62977	2.46714	14.2072	0.000163745	0.00164388
FBgn0010387	0.310084	8.27823	9.895	0.00165729	0.0104696
FBgn0010389	0.135765	4.1231	2.70932	0.0997633	0.228944
FBgn0010391	0.0673089	6.73933	2.46574	0.116353	0.254534
FBgn0010395	-0.00796913	4.16656	0.00762131	0.930433	0.965237
FBgn0010397	0.0353393	5.94541	0.359626	0.548714	0.711432
FBgn0010398	0.212632	4.24204	5.93969	0.0148037	0.0564054
FBgn0010399	-0.137374	3.55214	3.75386	0.0526857	0.145304
FBgn0010401	0.297391	3.7527	3.83837	0.0500921	0.140071
FBgn0010403	0.137021	3.3624	0.971664	0.324266	0.505786
FBgn0010406	0.0295278	5.88018	0.298599	0.584762	0.740109
FBgn0010407	-0.0245088	1.37465	0.0384318	0.844579	0.912214
FBgn0010408	0.283664	9.72062	25.3242	4.84579e-07	1.38653e-05
FBgn0010409	0.1331	10.1142	8.20836	0.00416978	0.0215956
FBgn0010411	0.195679	9.64366	14.2888	0.000156796	0.00159272
FBgn0010412	0.0496497	9.80555	1.22355	0.268665	0.450484
FBgn0010414	-0.170187	2.04567	2.55063	0.11025	0.244693
FBgn0010415	0.0255073	8.14403	0.167301	0.682522	0.810575
FBgn0010416	0.104869	5.48404	3.17138	0.0749392	0.187984
FBgn0010417	-0.152077	5.44644	5.39659	0.0201762	0.071463
FBgn0010421	-0.00176444	5.30655	0.000617119	0.980181	0.98981
FBgn0010422	0.0461219	5.79996	0.560578	0.454028	0.62995
FBgn0010423	-0.442264	4.3917	15.4131	8.63876e-05	0.000988936
FBgn0010424	-0.271801	4.35085	8.86231	0.00291119	0.0163876
FBgn0010425	-0.560161	8.7502	15.67	7.54101e-05	0.000883709
FBgn0010434	-0.0589111	7.97465	1.39372	0.237778	0.414367
FBgn0010435	0.149863	9.04344	10.0856	0.0014943	0.00961336
FBgn0010438	0.0536752	5.26321	0.332258	0.564332	0.724137
FBgn0010441	0.0263164	4.9142	0.0902621	0.763844	0.860756
FBgn0010452	-0.262894	2.7842	6.40855	0.0113572	0.0464355
FBgn0010453	-0.287692	2.04906	4.52088	0.0334837	0.103839
FBgn0010470	0.332057	6.93278	28.1123	1.14474e-07	4.14781e-06
FBgn0010473	-0.23703	6.5684	6.23895	0.012497	0.0499512
FBgn0010482	-0.355931	8.48627	18.7675	1.47661e-05	0.000237487
FBgn0010488	-0.0104731	10.0442	0.0596304	0.807081	0.88841
FBgn0010501	0.227895	5.53499	8.9282	0.00280801	0.015962
FBgn0010504	-0.0546471	6.7125	1.63919	0.200437	0.3708
FBgn0010516	0.0727345	7.46681	2.07261	0.149965	0.304273
FBgn0010520	0.182832	3.97385	3.01049	0.0827271	0.201481
FBgn0010531	-0.275089	3.81358	10.4807	0.00120627	0.00808484
FBgn0010548	0.0897019	8.60668	3.15014	0.0759204	0.189841
FBgn0010551	0.0553766	7.90068	1.61533	0.203744	0.375554
FBgn0010575	0.0066156	8.22779	0.0127782	0.909998	0.953029
FBgn0010583	-0.0098636	6.55416	0.0498724	0.823285	0.899782
FBgn0010590	0.134576	6.77927	4.77497	0.0288764	0.0930124
FBgn0010591	0.212246	6.33001	14.6289	0.000130895	0.00137415
FBgn0010602	-0.0158768	5.94498	0.049158	0.824535	0.900586
FBgn0010607	-0.427201	4.07643	17.8773	2.35611e-05	0.000343854
FBgn0010611	0.00799547	5.97766	0.0191712	0.889877	0.939596
FBgn0010612	-0.122725	8.53356	2.52953	0.111733	0.247288
FBgn0010620	-0.00724468	5.65906	0.0204209	0.886368	0.938256
FBgn0010621	0.0488874	7.67785	0.938817	0.332582	0.514236
FBgn0010622	0.0691003	4.45587	0.970632	0.324523	0.505921
FBgn0010638	0.176311	6.71105	6.59351	0.0102351	0.0428668
FBgn0010651	-0.17811	6.90684	5.24128	0.0220571	0.0765762
FBgn0010660	-0.0982366	7.47395	3.71337	0.0539784	0.147493
FBgn0010704	-0.0132546	7.58691	0.123732	0.725022	0.83597
FBgn0010741	0.122314	6.01735	4.96939	0.0257998	0.0857302
FBgn0010747	0.0716189	7.12858	2.98358	0.0841131	0.203303
FBgn0010750	-0.0954059	5.06084	1.70109	0.192145	0.360396
FBgn0010762	0.161687	7.0189	9.77826	0.00176587	0.0110012
FBgn0010768	-0.152468	3.96144	3.49329	0.0616179	0.16268
FBgn0010770	0.152914	5.39958	3.85266	0.0496673	0.139069
FBgn0010772	0.00697278	7.10067	0.0391675	0.843117	0.911387
FBgn0010774	0.13755	7.64079	5.78404	0.0161723	0.0604035
FBgn0010786	-0.00199921	7.48874	0.00129296	0.971316	0.9857
FBgn0010803	0.0526888	5.81699	0.952325	0.329128	0.510843
FBgn0010808	-0.221535	6.36824	14.9001	0.000113354	0.00122234
FBgn0010812	0.16205	5.20622	5.89098	0.0152186	0.0575459
FBgn0010825	0.0285532	8.41498	0.180682	0.670788	0.802891
FBgn0010830	-0.105611	5.92794	1.97012	0.160435	0.319031
FBgn0010877	-0.0102367	7.31468	0.0667945	0.796063	0.882368
FBgn0010894	0.14376	3.55526	2.38217	0.122727	0.264394
FBgn0010905	-0.300451	8.01811	31.0973	2.45417e-08	1.11582e-06
FBgn0010909	0.149835	8.19637	11.2237	0.000807608	0.00589772
FBgn0010926	0.0850528	5.80108	1.59726	0.206291	0.378815
FBgn0011016	0.0982322	6.71577	2.59234	0.107382	0.240414
FBgn0011020	-0.133782	5.52551	1.98065	0.159322	0.317404
FBgn0011202	0.0715237	6.75572	2.06772	0.150446	0.305053
FBgn0011204	-0.240669	7.89457	32.1131	1.45456e-08	7.2399e-07
FBgn0011205	0.432805	7.91867	75.6199	3.43873e-18	2.16801e-15
FBgn0011206	-0.117288	8.77346	1.59906	0.206036	0.378567
FBgn0011207	-0.00223459	5.90507	0.0019827	0.964484	0.982562
FBgn0011211	-0.420052	11.2328	31.8184	1.69282e-08	8.12638e-07
FBgn0011224	-0.238402	7.96999	17.3742	3.06958e-05	0.000423164
FBgn0011225	-0.0456833	8.73795	1.79065	0.180847	0.346418
FBgn0011227	-0.140746	7.42515	3.14517	0.0761523	0.190371
FBgn0011230	-0.186104	9.62024	4.49822	0.0339302	0.104862
FBgn0011232	-0.214821	6.16107	17.7747	2.48663e-05	0.000361049
FBgn0011236	-0.0333913	6.11119	0.329514	0.565945	0.725085
FBgn0011241	0.103196	4.6052	3.1878	0.0741896	0.186351
FBgn0011259	-0.0897553	5.60752	0.942206	0.331711	0.513289
FBgn0011260	-0.071563	6.90317	1.53837	0.21486	0.389563
FBgn0011272	0.200371	9.95143	14.2556	0.000159582	0.00161116
FBgn0011274	0.031448	6.63924	0.368155	0.544012	0.706692
FBgn0011279	0.419827	2.2088	8.20709	0.0041727	0.0215989
FBgn0011280	0.161	7.30561	4.90423	0.026791	0.0880342
FBgn0011281	0.273243	4.55138	3.20207	0.0735453	0.185373
FBgn0011282	-0.144824	1.73875	0.691675	0.405595	0.586328
FBgn0011283	-0.0453539	2.82188	0.0796513	0.777771	0.870768
FBgn0011284	0.151596	10.5352	9.96896	0.00159202	0.0101317
FBgn0011286	-0.402473	8.39672	18.5149	1.68586e-05	0.00026366
FBgn0011289	0.100589	6.86211	4.02959	0.0447088	0.12901
FBgn0011290	-0.0412673	5.4542	0.395477	0.529434	0.695469
FBgn0011291	-0.0137138	3.79754	0.0237479	0.877528	0.932867
FBgn0011293	0.235253	3.88002	2.70924	0.0997686	0.228944
FBgn0011294	0.112834	2.47394	0.637978	0.424444	0.603695
FBgn0011296	-0.126128	6.47745	1.52013	0.217601	0.392195
FBgn0011297	0.0731697	4.98505	1.26506	0.260696	0.440959
FBgn0011300	0.120215	6.59468	4.40142	0.035909	0.109687
FBgn0011305	-0.191177	5.36705	14.6865	0.000126952	0.00133594
FBgn0011327	0.00752299	6.42058	0.0219986	0.882091	0.935719
FBgn0011335	-0.13938	4.64303	2.44973	0.117545	0.256431
FBgn0011336	-0.0106083	7.34555	0.029174	0.864378	0.924813
FBgn0011361	-0.258588	7.49969	15.5884	7.87358e-05	0.000913625
FBgn0011455	-0.142079	7.61763	5.67994	0.01716	0.0631693
FBgn0011474	-0.0789587	7.08293	1.53832	0.214867	0.389563
FBgn0011476	0.149452	3.44423	2.5893	0.107588	0.240762
FBgn0011481	0.125241	6.13349	1.49351	0.221672	0.397005
FBgn0011509	0.293412	5.2461	29.2578	6.33607e-08	2.46585e-06
FBgn0011554	0.336232	3.81907	10.029	0.00154094	0.00983634
FBgn0011555	-0.0672884	6.84782	0.277591	0.598284	0.750483
FBgn0011556	0.0280586	4.41907	0.0579342	0.809791	0.88966
FBgn0011566	-0.274588	4.60135	12.5027	0.000406367	0.00340692
FBgn0011570	0.188236	5.67779	11.5082	0.000692886	0.00524719
FBgn0011571	0.171627	6.51912	5.84194	0.0156485	0.0588656
FBgn0011573	-0.0695862	6.1824	1.7985	0.179894	0.34522
FBgn0011576	-0.215856	5.38834	10.2676	0.00135386	0.00888466
FBgn0011581	-0.185419	4.53506	8.32089	0.00391916	0.0205908
FBgn0011584	0.0767548	7.44862	4.41139	0.0356997	0.109189
FBgn0011586	0.0806727	5.05576	1.35792	0.243899	0.421364
FBgn0011589	-0.115595	2.38262	1.29306	0.255484	0.435347
FBgn0011591	-0.192171	4.12802	8.09059	0.00444957	0.0226898
FBgn0011592	-0.171624	5.36053	6.38197	0.0115286	0.047014
FBgn0011604	-0.0587396	7.03708	1.06125	0.30293	0.486177
FBgn0011606	-0.068277	7.37638	1.38142	0.239859	0.416301
FBgn0011638	0.207146	6.76452	13.6323	0.000222331	0.00210469
FBgn0011640	-0.109118	7.19513	6.80356	0.00909763	0.0392501
FBgn0011642	0.112846	6.61088	2.93517	0.0866696	0.20745
FBgn0011648	0.000368057	7.22251	4.49829e-05	0.994649	0.99763
FBgn0011655	0.136696	6.01695	4.73044	0.0296334	0.0947086
FBgn0011656	-0.079611	7.20935	3.34954	0.0672237	0.173811
FBgn0011659	0.276536	3.94512	2.57877	0.108306	0.241703
FBgn0011660	0.254561	5.58556	11.2333	0.000803431	0.00587176
FBgn0011661	0.109492	8.89974	7.76159	0.00533689	0.0261129
FBgn0011666	-0.360864	6.74191	26.2922	2.9347e-07	9.06977e-06
FBgn0011672	-0.0308981	6.84176	0.373689	0.541	0.704328
FBgn0011674	0.0560529	4.93103	0.565154	0.452191	0.628247
FBgn0011676	-0.0639097	2.97058	0.546414	0.459787	0.635177
FBgn0011692	0.0609131	6.20607	0.431522	0.511243	0.681153
FBgn0011693	0.209477	7.7206	10.1118	0.00147323	0.00949072
FBgn0011695	0.381779	9.55646	22.9032	1.7037e-06	4.0893e-05
FBgn0011701	0.0158727	4.03425	0.0503673	0.822425	0.89912
FBgn0011703	0.361107	6.8116	5.90198	0.0151239	0.0572793
FBgn0011704	0.193661	7.39342	4.75474	0.0292176	0.0937109
FBgn0011705	0.2174	5.4914	8.83884	0.00294886	0.0165504
FBgn0011706	0.150811	0.324259	0.590715	0.442143	0.620494
FBgn0011708	-0.0445429	6.93554	1.24	0.265472	0.446799
FBgn0011710	0.053249	6.53932	1.02639	0.311007	0.49403
FBgn0011715	0.0613162	5.67718	0.776916	0.378086	0.559994
FBgn0011722	0.397223	6.20526	13.4757	0.000241669	0.00224988
FBgn0011723	0.209013	2.90322	4.34512	0.0371152	0.112463
FBgn0011725	-0.0498231	9.03274	1.24655	0.264213	0.445697
FBgn0011726	0.233748	8.07831	21.4574	3.61774e-06	7.63683e-05
FBgn0011737	-0.0513972	6.37591	1.14725	0.284125	0.467381
FBgn0011739	-0.051552	6.97269	0.870042	0.350944	0.533153
FBgn0011740	0.0769484	6.43731	2.10825	0.146507	0.300025
FBgn0011741	0.0413726	4.7695	0.349807	0.554222	0.716446
FBgn0011742	0.145579	7.3765	15.9461	6.5171e-05	0.000782623
FBgn0011745	0.0934204	6.25745	4.69075	0.0303255	0.09637
FBgn0011746	0.0425751	5.16152	0.286134	0.592709	0.746674
FBgn0011747	-0.102284	8.44339	2.63385	0.104608	0.236016
FBgn0011754	-0.100646	6.98007	9.82369	0.00172279	0.0107983
FBgn0011758	0.0855152	0.466077	0.215641	0.642381	0.782256
FBgn0011761	0.142958	10.1268	0.647902	0.420864	0.600862
FBgn0011762	0.213889	3.91015	1.8595	0.172682	0.335963
FBgn0011763	0.221082	7.48039	23.3454	1.35369e-06	3.36891e-05
FBgn0011764	0.269853	6.86858	22.1676	2.49854e-06	5.58727e-05
FBgn0011766	0.0246142	7.71643	0.183193	0.668644	0.801242
FBgn0011768	0.128885	6.99227	4.04933	0.044189	0.127875
FBgn0011769	-0.16081	3.69809	4.84407	0.0277413	0.0904342
FBgn0011770	0.221863	6.55624	6.40471	0.0113818	0.0465159
FBgn0011771	0.137854	5.7865	5.42482	0.0198525	0.0705348
FBgn0011774	0.311663	5.14507	10.6303	0.0011125	0.00759633
FBgn0011785	0.0856225	7.31811	2.73426	0.0982169	0.226325
FBgn0011787	-0.0281363	5.54926	0.10114	0.750466	0.852307
FBgn0011802	0.15591	5.72618	4.16645	0.0412321	0.12155
FBgn0011818	-0.056149	5.49051	0.813785	0.367003	0.548735
FBgn0011822	0.229576	4.05002	2.21073	0.137054	0.286181
FBgn0011823	-0.0501822	10.5242	1.06239	0.30267	0.486072
FBgn0011824	0.260696	5.58829	10.7285	0.00105499	0.00731457
FBgn0011826	0.241911	1.85083	1.77995	0.182155	0.347658
FBgn0011828	-0.14332	6.84727	3.28245	0.0700243	0.178826
FBgn0011829	0.356052	1.09354	5.17883	0.0228637	0.0786261
FBgn0011834	0.324455	4.32792	7.68455	0.00556955	0.026928
FBgn0011836	-0.0598184	5.63289	0.954987	0.328453	0.51013
FBgn0011837	0.080087	6.31378	1.67529	0.195552	0.364257
FBgn0012034	0.520981	9.0104	27.012	2.02196e-07	6.57102e-06
FBgn0012036	0.22363	8.91065	15.2545	9.39542e-05	0.00105526
FBgn0012037	-0.0137256	7.69849	0.0435339	0.834723	0.906894
FBgn0012051	-0.0109407	5.64736	0.0518063	0.819949	0.897247
FBgn0012058	-0.157122	7.30938	10.5391	0.00116874	0.00790596
FBgn0012344	0.0882623	3.3214	1.44909	0.228674	0.405127
FBgn0013263	0.128359	6.87211	6.75947	0.00932513	0.0399944
FBgn0013269	0.116482	7.7254	4.73191	0.029608	0.0946594
FBgn0013272	-0.0381835	9.63523	0.544242	0.46068	0.636193
FBgn0013303	-0.00574028	5.87254	0.0106435	0.91783	0.957914
FBgn0013305	0.176922	7.05219	19.5827	9.63385e-06	0.000165349
FBgn0013307	0.172117	6.17445	2.22698	0.135619	0.284379
FBgn0013308	-0.327814	-0.0389544	2.00563	0.156716	0.313438
FBgn0013325	0.175177	9.89684	9.13653	0.00250555	0.0146334
FBgn0013334	-0.174079	7.9873	9.56567	0.0019825	0.0120647
FBgn0013342	-0.106897	7.93469	3.70442	0.0542686	0.147944
FBgn0013343	-0.015255	6.85973	0.0339043	0.853911	0.91808
FBgn0013347	-0.0843366	6.06918	2.8722	0.0901217	0.21291
FBgn0013432	0.10493	5.15427	3.48416	0.0619587	0.16317
FBgn0013433	-0.120293	1.48813	0.819303	0.365384	0.547269
FBgn0013435	0.0437071	3.51737	0.210122	0.646672	0.784654
FBgn0013467	-0.111361	6.35974	4.09751	0.0429465	0.12523
FBgn0013469	0.301415	2.67979	7.66258	0.00563778	0.027145
FBgn0013531	-0.0914179	3.7622	1.0964	0.295058	0.478724
FBgn0013548	-0.0479736	5.92213	0.214609	0.643179	0.782824
FBgn0013563	-0.0845389	5.00741	2.43156	0.118914	0.258715
FBgn0013576	-0.151387	9.07125	13.2457	0.000273201	0.00247477
FBgn0013717	0.0699758	5.59289	1.07146	0.300616	0.48414
FBgn0013718	-0.065635	7.16136	2.70835	0.0998241	0.228968
FBgn0013720	0.0153858	5.33968	0.0650299	0.798716	0.884479
FBgn0013725	-0.0483596	2.55788	0.337389	0.56134	0.722159
FBgn0013726	0.0725703	7.39342	2.23154	0.135219	0.283855
FBgn0013732	-0.0644665	6.16869	0.542997	0.461193	0.636472
FBgn0013733	-0.399258	10.0914	15.8301	6.92913e-05	0.000825016
FBgn0013746	0.000226813	5.76688	1.94067e-05	0.996485	0.998306
FBgn0013749	0.00553781	6.52275	0.00913201	0.923869	0.961381
FBgn0013750	0.0580122	6.8964	1.39552	0.237475	0.414049
FBgn0013751	0.192084	0.223717	0.779489	0.377298	0.559351
FBgn0013753	-0.178153	4.54565	5.21089	0.0224458	0.0776977
FBgn0013756	-0.144963	7.70621	5.18186	0.0228239	0.0785879
FBgn0013759	-0.101087	7.64682	6.18201	0.0129055	0.051173
FBgn0013762	0.0011408	5.10725	0.000412265	0.983801	0.991618
FBgn0013763	0.0737655	8.5046	2.81737	0.0932493	0.218518
FBgn0013764	0.0564472	5.67737	0.680132	0.409541	0.589592
FBgn0013765	-0.0798809	8.10932	3.09649	0.0784612	0.194599
FBgn0013767	0.167742	0.630294	0.967559	0.32529	0.506381
FBgn0013770	0.176012	9.40535	12.6658	0.000372404	0.00319295
FBgn0013771	0.239691	5.57224	5.9868	0.0144133	0.055522
FBgn0013772	-0.0495065	6.08333	0.041103	0.839339	0.908612
FBgn0013773	0.0637003	4.91215	0.400398	0.526884	0.693879
FBgn0013799	0.00415984	6.38405	0.00670856	0.934722	0.967001
FBgn0013809	-0.189305	6.21424	0.571071	0.449834	0.626706
FBgn0013810	-0.163121	6.79314	3.6259	0.0568867	0.153095
FBgn0013811	-0.209727	5.22821	5.92645	0.0149153	0.0567165
FBgn0013812	-0.212016	3.50958	3.91206	0.0479407	0.1357
FBgn0013813	-0.1608	6.38439	1.86457	0.172098	0.33509
FBgn0013949	0.507494	4.89736	13.2947	0.00026616	0.00242726
FBgn0013953	0.195264	4.3698	5.43186	0.0197727	0.0704029
FBgn0013954	0.119368	7.85743	2.74037	0.0978422	0.226012
FBgn0013972	0.0349383	4.66189	0.335887	0.562213	0.722987
FBgn0013973	-0.0596533	4.21748	0.978275	0.322625	0.504642
FBgn0013983	0.240084	4.04822	9.60947	0.00193576	0.0118336
FBgn0013984	-0.127381	6.38375	1.70478	0.191664	0.359708
FBgn0013987	0.0919593	7.17199	3.9234	0.0476185	0.13491
FBgn0013995	-0.137028	8.12767	13.5849	0.000228008	0.00214982
FBgn0013997	0.110372	6.5814	6.11659	0.0133919	0.0525725
FBgn0013998	0.13264	5.99732	8.72316	0.00314194	0.0173255
FBgn0014000	0.162272	5.42427	5.32359	0.0210386	0.0736625
FBgn0014001	0.00388971	6.87116	0.00844314	0.926788	0.963016
FBgn0014002	0.168209	9.38262	8.84656	0.00293641	0.0165001
FBgn0014006	-0.00463841	6.78555	0.0101704	0.919671	0.959123
FBgn0014007	0.041788	6.58222	0.422538	0.515674	0.684794
FBgn0014009	-0.00380466	7.05412	0.0112254	0.915622	0.956271
FBgn0014010	0.109859	8.15426	8.03652	0.00458436	0.0232214
FBgn0014011	0.104564	6.24166	3.29537	0.0694754	0.178087
FBgn0014018	0.199371	7.30963	5.54689	0.0185135	0.066902
FBgn0014019	0.0736286	5.26838	1.11545	0.2909	0.474645
FBgn0014020	0.167219	8.63831	10.9009	0.000961169	0.00680125
FBgn0014022	-0.0888654	4.586	1.18146	0.27706	0.460322
FBgn0014023	0.0324142	4.98553	0.208273	0.648125	0.785668
FBgn0014026	0.196741	10.7961	12.8796	0.000332188	0.00288476
FBgn0014028	0.17348	8.64943	8.24251	0.00409205	0.0213215
FBgn0014029	0.0569357	6.11122	1.12969	0.287842	0.47137
FBgn0014031	0.017174	5.86597	0.0417218	0.838151	0.908249
FBgn0014032	0.0861733	4.76867	1.38215	0.239735	0.416301
FBgn0014033	-0.339553	4.2488	9.95518	0.00160398	0.0101873
FBgn0014037	0.0196314	7.57566	0.132856	0.715489	0.830901
FBgn0014073	-0.0361956	5.2063	0.345791	0.556506	0.717697
FBgn0014075	-0.0615988	7.38376	2.01786	0.155458	0.312004
FBgn0014092	0.335238	4.40078	16.4358	5.03254e-05	0.000641411
FBgn0014127	-0.132829	5.42586	3.45914	0.0629029	0.164967
FBgn0014133	-0.0021437	8.7801	0.00210093	0.963441	0.982029
FBgn0014135	-0.167931	3.35127	2.67011	0.102249	0.232612
FBgn0014141	-0.0556352	8.36644	1.28695	0.256611	0.436704
FBgn0014163	-0.199855	8.24205	13.1451	0.000288274	0.00258408
FBgn0014184	0.125098	10.9249	6.24876	0.012428	0.0497173
FBgn0014189	0.140813	7.48175	8.95785	0.0027628	0.0157682
FBgn0014269	-0.138988	5.22555	3.05975	0.0802538	0.197779
FBgn0014340	0.0065211	5.35112	0.00947675	0.92245	0.960355
FBgn0014342	-0.0798126	2.91243	0.335401	0.562496	0.723154
FBgn0014343	0.19867	4.00982	5.56851	0.0182863	0.0664156
FBgn0014366	0.107878	5.2814	2.89843	0.0886657	0.210576
FBgn0014380	0.0166755	4.89654	0.069179	0.792536	0.8798
FBgn0014388	0.0185682	4.55141	0.0463157	0.829603	0.903881
FBgn0014391	-0.366224	8.23286	22.592	2.00316e-06	4.71241e-05
FBgn0014396	0.270329	8.85005	3.79781	0.0513196	0.142744
FBgn0014411	0.012131	6.96539	0.102761	0.748541	0.850719
FBgn0014417	0.292957	5.47354	8.96603	0.00275046	0.0157335
FBgn0014427	0.438853	6.50924	19.0976	1.24201e-05	0.000204629
FBgn0014454	-3.4881	2.26373	117.674	2.04384e-27	1.93286e-23
FBgn0014455	0.459514	7.62681	42.0342	8.96932e-11	9.53066e-09
FBgn0014467	0.0364327	6.76722	0.790732	0.373879	0.556727
FBgn0014469	-0.0470971	6.98964	0.153618	0.695102	0.818219
FBgn0014859	-0.255958	2.93086	6.95637	0.00835215	0.0367892
FBgn0014861	-0.176283	6.68673	2.44247	0.11809	0.257329
FBgn0014863	-0.0997357	8.06804	2.40325	0.121083	0.261973
FBgn0014865	1.16123	3.43867	1.81204	0.178263	0.342949
FBgn0014868	0.078114	6.66719	1.40517	0.235859	0.412525
FBgn0014869	-0.30728	8.67257	20.6281	5.57716e-06	0.000106768
FBgn0014870	-0.198483	6.76174	18.6225	1.59331e-05	0.000251552
FBgn0014877	0.0405581	6.73317	0.571712	0.44958	0.626682
FBgn0014879	-0.15859	6.87758	8.04292	0.00456818	0.0231642
FBgn0014903	-0.145362	4.55404	2.26525	0.132305	0.279412
FBgn0014906	0.0858708	7.36834	3.81682	0.0507404	0.141442
FBgn0014930	0.106274	4.59647	2.96944	0.0848513	0.204547
FBgn0014931	0.0146019	2.46896	0.0104925	0.918413	0.958128
FBgn0015000	-0.0967136	5.75911	3.02565	0.0819574	0.200329
FBgn0015001	-0.337969	3.65384	7.9543	0.00479732	0.0240044
FBgn0015010	0.448879	7.49222	24.5994	7.05724e-07	1.89048e-05
FBgn0015011	0.0935408	4.68225	1.46746	0.225747	0.401808
FBgn0015019	0.0162308	7.74225	0.111991	0.737889	0.843914
FBgn0015024	-0.0283522	8.35085	0.333707	0.563484	0.723933
FBgn0015025	0.120942	3.07389	1.11264	0.291508	0.475063
FBgn0015031	-0.025486	7.27503	0.0708751	0.790067	0.878502
FBgn0015032	-0.00825847	1.57098	0.00147439	0.96937	0.985311
FBgn0015033	0.19499	3.93052	2.76282	0.0964779	0.223955
FBgn0015034	-0.0711266	4.54303	0.157611	0.691366	0.815862
FBgn0015035	0.0972869	4.8747	0.210013	0.646757	0.784654
FBgn0015036	-0.158526	3.45005	2.99817	0.0833586	0.202428
FBgn0015037	0.208417	6.88451	6.30632	0.0120308	0.0484356
FBgn0015038	0.287832	3.10035	3.56927	0.0588583	0.157149
FBgn0015039	0.12517	7.77859	0.982628	0.321551	0.503536
FBgn0015040	0.0574169	4.81092	0.178743	0.672456	0.803661
FBgn0015075	-0.000994487	5.18029	0.000231133	0.98787	0.99386
FBgn0015129	-0.407542	1.56808	9.16801	0.00246282	0.0144305
FBgn0015218	0.0570218	9.00603	1.90189	0.167867	0.329566
FBgn0015221	-0.0202725	9.83787	0.255996	0.612884	0.761719
FBgn0015222	0.111539	9.63089	7.95483	0.00479593	0.0240044
FBgn0015229	0.213147	6.77525	8.25421	0.00406577	0.0212196
FBgn0015239	0.215423	5.65941	15.4439	8.49921e-05	0.000976195
FBgn0015240	-0.136753	5.81466	6.83084	0.00895969	0.0387789
FBgn0015245	-0.061128	8.76788	1.24958	0.263632	0.44502
FBgn0015247	-0.125555	6.70428	11.31	0.000770908	0.00567794
FBgn0015268	0.0170765	9.71528	0.138186	0.710091	0.82691
FBgn0015269	-0.205628	7.09154	6.04649	0.013934	0.0540056
FBgn0015270	-0.72945	4.8644	22.0439	2.66484e-06	5.88817e-05
FBgn0015271	0.291714	4.01819	3.70104	0.0543784	0.148201
FBgn0015277	0.0423487	5.12717	0.541909	0.461643	0.636779
FBgn0015278	-0.108262	7.42821	6.56415	0.0104054	0.0434261
FBgn0015279	0.121892	6.91672	4.80838	0.0283216	0.0915997
FBgn0015282	0.16707	7.4208	13.1647	0.000285279	0.00256878
FBgn0015283	0.0977696	7.56911	4.70554	0.0300656	0.0958309
FBgn0015286	0.228917	7.13283	13.5907	0.000227304	0.00214532
FBgn0015288	0.119435	9.88738	6.9692	0.00829246	0.0366628
FBgn0015295	0.0193969	5.39915	0.0902082	0.763913	0.860756
FBgn0015296	-0.111444	5.36153	3.88376	0.0487553	0.137496
FBgn0015299	-0.0733092	4.91726	0.824783	0.363785	0.545649
FBgn0015320	0.0640443	7.30073	1.46813	0.225641	0.401711
FBgn0015321	-0.0241575	7.4067	0.233729	0.628773	0.77171
FBgn0015323	-0.349967	3.72453	10.6689	0.00108954	0.00747843
FBgn0015324	-0.073801	9.86965	2.80901	0.0937363	0.219042
FBgn0015331	0.141795	5.12161	2.7364	0.0980854	0.226242
FBgn0015336	-0.246714	3.7194	3.50158	0.0613102	0.162049
FBgn0015338	0.083444	5.51174	1.90045	0.168028	0.329813
FBgn0015359	-0.135705	5.80634	5.74028	0.0165801	0.061562
FBgn0015360	-0.0891279	6.19492	2.96183	0.0852515	0.205146
FBgn0015371	-0.0157519	6.97137	0.0581534	0.809439	0.88948
FBgn0015372	0.0940383	5.6109	3.09019	0.0787657	0.19505
FBgn0015374	-0.0353289	6.32834	0.640534	0.423518	0.602831
FBgn0015376	-0.345408	4.87764	5.55021	0.0184785	0.0668008
FBgn0015379	0.0340742	4.99719	0.220869	0.638378	0.779187
FBgn0015380	-0.0999188	3.04772	1.41984	0.233429	0.410021
FBgn0015391	-0.148675	6.6678	3.04192	0.0811397	0.199154
FBgn0015393	0.373702	5.89353	7.97263	0.00474898	0.0238635
FBgn0015396	-0.131373	6.53337	1.87888	0.170462	0.332749
FBgn0015399	-0.0599119	4.54589	0.793884	0.372928	0.555661
FBgn0015400	-0.140604	2.28952	1.67943	0.195	0.363874
FBgn0015402	-0.141697	5.72269	6.66287	0.0098442	0.0415981
FBgn0015477	0.0655503	7.15198	2.00616	0.156661	0.313438
FBgn0015509	-0.0100112	8.21602	0.0481185	0.82637	0.901902
FBgn0015513	0.148195	7.53792	7.18291	0.00736014	0.0334157
FBgn0015519	-0.0643685	1.67813	0.18882	0.663901	0.797467
FBgn0015520	-0.196021	3.88334	1.04505	0.30665	0.489948
FBgn0015521	0.095076	8.72515	3.03069	0.0817032	0.200121
FBgn0015522	0.205237	6.58142	7.48104	0.00623519	0.0293656
FBgn0015524	0.0255213	1.97656	0.0396249	0.842216	0.910767
FBgn0015527	0.0691253	6.64127	1.13194	0.287362	0.471108
FBgn0015541	-0.320863	6.55477	23.5762	1.20063e-06	3.04406e-05
FBgn0015542	0.0109143	8.46534	0.041262	0.839033	0.908468
FBgn0015544	-0.209679	5.71162	14.6858	0.000126997	0.00133594
FBgn0015546	0.0511031	4.83725	0.300404	0.58363	0.73927
FBgn0015553	0.304755	5.83357	1.54526	0.213837	0.388245
FBgn0015558	-0.0368681	4.07206	0.118598	0.73056	0.839376
FBgn0015561	0.010195	1.87067	0.00502724	0.943475	0.970983
FBgn0015565	-0.0310892	7.57447	0.196235	0.657777	0.792938
FBgn0015568	-0.260479	5.27838	10.8042	0.00101267	0.00708348
FBgn0015569	0.121204	6.6978	3.00973	0.0827661	0.201524
FBgn0015570	-0.22015	5.02484	5.84402	0.0156301	0.0588195
FBgn0015571	0.0419536	6.98891	0.840702	0.359196	0.54101
FBgn0015572	0.0367824	1.88342	0.0803585	0.776812	0.870017
FBgn0015575	0.157201	7.29715	7.50804	0.00614243	0.0290716
FBgn0015576	0.399206	6.27355	24.2224	8.58299e-07	2.2277e-05
FBgn0015577	0.0430092	5.65798	0.695279	0.404375	0.585124
FBgn0015582	-0.0360562	5.03585	0.120961	0.727995	0.837243
FBgn0015589	-0.0681868	6.94609	1.53263	0.215719	0.389993
FBgn0015591	0.0843734	4.12172	1.60213	0.205601	0.377988
FBgn0015600	-0.0984707	8.57564	3.74819	0.0528646	0.145628
FBgn0015602	0.156973	5.80274	4.52177	0.0334662	0.103835
FBgn0015609	-0.278292	5.49882	6.48979	0.0108496	0.0448447
FBgn0015615	0.0355278	6.46994	0.370233	0.542877	0.705917
FBgn0015618	0.197208	3.55842	2.33757	0.126286	0.270079
FBgn0015622	-0.105602	8.47113	7.23742	0.00713997	0.0326422
FBgn0015623	0.262398	10.4998	39.1581	3.90847e-10	3.2611e-08
FBgn0015625	-0.0996563	7.80145	1.56021	0.211635	0.385707
FBgn0015663	0.294685	4.17113	6.27432	0.01225	0.0491716
FBgn0015664	-0.170785	6.10049	7.89648	0.0049531	0.0246275
FBgn0015714	0.371922	5.01354	10.7532	0.00104101	0.00723888
FBgn0015721	-0.00777664	2.28008	0.00290675	0.957003	0.977708
FBgn0015737	0.10731	7.84825	3.26138	0.0709293	0.180452
FBgn0015754	0.0200485	7.85298	0.229094	0.632197	0.774541
FBgn0015756	0.131396	9.72956	7.28941	0.00693622	0.0319046
FBgn0015765	0.207872	4.28416	6.9492	0.00838567	0.0369024
FBgn0015766	0.0473439	10.5148	1.11724	0.290513	0.474423
FBgn0015772	0.0789746	7.0584	3.06543	0.079974	0.19736
FBgn0015773	0.104844	4.70562	2.60424	0.106578	0.239105
FBgn0015776	0.111465	8.76268	8.33549	0.00388779	0.0204715
FBgn0015777	-0.0154795	8.59338	0.0989434	0.753101	0.853762
FBgn0015778	-0.0686026	9.69148	1.25106	0.263349	0.444652
FBgn0015781	0.0599621	4.804	0.894852	0.344166	0.526663
FBgn0015789	0.061968	7.81736	2.73755	0.0980152	0.226205
FBgn0015790	0.118577	8.22655	9.53975	0.0020107	0.0122048
FBgn0015791	-0.00458293	6.59569	0.0154337	0.901131	0.947758
FBgn0015793	0.00838829	4.86835	0.0197531	0.888229	0.93865
FBgn0015794	0.100938	5.52644	2.65438	0.103265	0.234191
FBgn0015795	0.0534721	8.16847	1.72349	0.189245	0.35644
FBgn0015797	0.213906	6.64062	22.4189	2.19202e-06	5.09335e-05
FBgn0015799	-0.182533	6.98832	8.35843	0.00383902	0.0202712
FBgn0015801	0.0287412	5.24637	0.192118	0.66116	0.795394
FBgn0015803	0.0525995	6.41395	1.28265	0.257406	0.437227
FBgn0015805	0.353033	7.23344	30.7325	2.96162e-08	1.29956e-06
FBgn0015806	0.0898229	7.63872	2.79622	0.094487	0.220524
FBgn0015818	-0.0752678	4.96554	0.711775	0.398855	0.580214
FBgn0015828	-0.22729	5.73928	13.6633	0.000218682	0.00208056
FBgn0015829	-0.230757	4.81399	14.3544	0.000151425	0.00154981
FBgn0015834	-0.100406	7.57057	4.07245	0.0435881	0.12664
FBgn0015838	-0.232687	5.05514	8.05565	0.0045362	0.0230639
FBgn0015872	0.0697054	6.57337	1.2553	0.262543	0.44345
FBgn0015903	-0.169038	6.67223	10.5261	0.00117702	0.0079508
FBgn0015904	0.133425	2.32385	1.77193	0.183144	0.348887
FBgn0015905	0.22653	5.07649	7.23405	0.00715337	0.0326651
FBgn0015907	-0.121451	6.98316	6.84494	0.00888929	0.0385447
FBgn0015919	0.0901018	3.19316	0.957202	0.327893	0.509594
FBgn0015924	0.163809	7.45435	11.1423	0.0008438	0.00609146
FBgn0015925	-0.0205789	5.34908	0.0812625	0.775594	0.869088
FBgn0015929	-0.241298	6.72353	7.31577	0.00683519	0.0315618
FBgn0015949	-0.189975	6.9412	19.407	1.05619e-05	0.000179324
FBgn0016013	0.267556	4.52991	10.5059	0.00118993	0.00800937
FBgn0016031	0.444537	7.53154	76.8859	1.81123e-18	1.4274e-15
FBgn0016032	-0.0757916	3.05146	0.928672	0.335208	0.517055
FBgn0016034	-0.234575	5.89412	6.6405	0.00996857	0.0419736
FBgn0016038	-0.073324	5.58447	2.29097	0.130129	0.275925
FBgn0016041	0.120846	7.25506	6.21899	0.0126387	0.0504109
FBgn0016047	-0.0655966	0.995774	0.113535	0.736155	0.842631
FBgn0016054	0.347227	1.98434	2.14139	0.143372	0.295075
FBgn0016059	0.0435895	7.889	0.900694	0.342596	0.525025
FBgn0016061	-0.134541	4.49911	2.98708	0.0839314	0.203046
FBgn0016070	0.0279975	10.0696	0.202681	0.652565	0.788868
FBgn0016075	-0.231178	8.01781	7.82852	0.00514283	0.0254105
FBgn0016076	-0.0403074	8.07286	0.106021	0.744721	0.847754
FBgn0016078	0.196381	5.72943	12.3592	0.00043882	0.00362755
FBgn0016081	-0.144112	7.99906	6.57682	0.0103316	0.0431752
FBgn0016119	-0.144932	8.67067	5.17169	0.0229579	0.0789195
FBgn0016120	-0.266931	8.62431	11.5007	0.000695685	0.00525867
FBgn0016122	-0.214908	7.84779	12.0125	0.000528451	0.0041961
FBgn0016123	-0.00794277	8.31574	0.00794787	0.928962	0.964346
FBgn0016126	0.175345	7.98809	11.1655	0.000833329	0.00602507
FBgn0016131	0.0352641	5.72518	0.235126	0.627749	0.771567
FBgn0016641	-0.271983	6.75675	27.5434	1.53608e-07	5.24428e-06
FBgn0016650	0.0894058	4.15184	1.17538	0.278298	0.461276
FBgn0016660	0.138128	1.12279	0.722324	0.395383	0.577027
FBgn0016672	0.0789063	5.97568	1.92389	0.165429	0.326269
FBgn0016675	-0.295688	5.51652	2.95491	0.085617	0.205659
FBgn0016684	0.302013	5.57988	8.42166	0.00370776	0.0197657
FBgn0016685	0.239662	7.4227	16.8843	3.97291e-05	0.000523284
FBgn0016687	-0.0169226	7.87935	0.107738	0.742734	0.846783
FBgn0016691	-0.28617	8.86785	13.8275	0.00020038	0.00194758
FBgn0016693	0.0709524	7.88687	4.98419	0.02558	0.0852997
FBgn0016694	0.0560686	9.23139	0.334944	0.562763	0.723399
FBgn0016696	0.227212	7.10853	34.5917	4.06645e-09	2.33069e-07
FBgn0016697	0.225086	7.00125	20.7058	5.35545e-06	0.000103997
FBgn0016698	-0.0227286	4.57569	0.113126	0.736612	0.84268
FBgn0016700	0.00126154	8.15049	0.000846285	0.976792	0.988287
FBgn0016701	0.0216599	5.72965	0.216822	0.641472	0.781551
FBgn0016715	0.168075	4.02399	2.99994	0.0832674	0.202276
FBgn0016726	0.0388148	8.75433	0.442949	0.505702	0.676439
FBgn0016754	0.0227041	6.24206	0.163948	0.685547	0.812369
FBgn0016756	-0.10165	8.63703	6.56237	0.0104157	0.0434502
FBgn0016762	-0.0446621	3.53178	0.231341	0.630531	0.773156
FBgn0016792	0.0268489	6.82414	0.125357	0.723295	0.835593
FBgn0016794	0.114111	6.43171	2.96761	0.0849474	0.204674
FBgn0016797	0.0350883	4.34815	0.15202	0.696612	0.819226
FBgn0016917	0.0379058	8.70447	0.460454	0.497412	0.669041
FBgn0016920	-0.452429	1.8888	13.7051	0.000213873	0.0020534
FBgn0016926	0.00390209	8.27347	0.00427875	0.947846	0.973055
FBgn0016930	-0.00431943	6.64684	0.00798323	0.928805	0.9643
FBgn0016970	-0.264167	3.26139	3.46329	0.0627453	0.164691
FBgn0016975	-0.258646	6.86534	10.767	0.00103325	0.0071955
FBgn0016976	-0.450394	5.30762	18.1914	1.99781e-05	0.0003035
FBgn0016977	0.158246	8.69438	1.04349	0.307011	0.490192
FBgn0016978	-0.176072	5.58452	7.63239	0.00573292	0.0274374
FBgn0016983	0.00383276	7.19099	0.0061339	0.937574	0.968439
FBgn0016984	0.273167	6.86129	39.8661	2.71979e-10	2.44962e-08
FBgn0017414	-0.272156	4.07757	11.8264	0.000583964	0.00454531
FBgn0017418	-0.334895	7.90169	36.0037	1.96946e-09	1.30246e-07
FBgn0017429	-0.00238422	5.31116	0.00132583	0.970954	0.985649
FBgn0017430	-0.0404058	4.7928	0.255367	0.613321	0.762037
FBgn0017448	0.456956	5.05986	21.914	2.85147e-06	6.25669e-05
FBgn0017457	-0.151743	5.68607	4.29384	0.0382507	0.114939
FBgn0017482	0.286714	4.06012	15.0124	0.000106805	0.00116769
FBgn0017545	0.0647696	10.7958	1.26799	0.260143	0.440182
FBgn0017549	-0.054047	6.32191	1.27456	0.258913	0.438728
FBgn0017550	-0.0130498	7.31349	0.0938005	0.7594	0.85792
FBgn0017551	0.0589086	5.68214	0.604086	0.437023	0.616233
FBgn0017558	-0.0764505	7.63162	2.06191	0.151021	0.305825
FBgn0017561	0.260525	6.14831	11.0087	0.000906847	0.00646274
FBgn0017566	-0.0842857	9.35733	2.25517	0.133169	0.280798
FBgn0017567	-0.0717912	7.93738	1.69385	0.193094	0.361458
FBgn0017572	0.00526048	6.62592	0.0207128	0.885564	0.937615
FBgn0017577	0.0353935	6.7671	0.125744	0.722886	0.835518
FBgn0017578	0.0873961	5.05899	2.59328	0.107318	0.240362
FBgn0017579	0.219989	9.67682	21.3325	3.86135e-06	8.04335e-05
FBgn0017581	0.0399057	10.4762	0.417808	0.518033	0.686854
FBgn0017590	-0.106323	4.41562	4.21056	0.0401731	0.119358
FBgn0019624	-0.169649	9.23321	5.36387	0.0205581	0.0724726
FBgn0019637	-0.00834438	5.90859	0.0147025	0.90349	0.949262
FBgn0019643	-0.0889392	7.96318	1.72319	0.189283	0.35644
FBgn0019644	-0.255972	9.12917	10.2356	0.00137753	0.00898436
FBgn0019650	-0.0458048	4.23395	0.339343	0.560209	0.720998
FBgn0019662	0.0323496	6.01232	0.777175	0.378007	0.559964
FBgn0019686	0.0897156	7.52378	1.02711	0.310839	0.493908
FBgn0019830	0.154207	7.08775	8.68999	0.00319963	0.0175617
FBgn0019886	0.120729	8.21387	9.72109	0.00182165	0.0112671
FBgn0019890	-0.20918	7.8445	35.1844	2.9991e-09	1.79509e-07
FBgn0019925	0.103924	7.20245	6.28849	0.0121525	0.0488631
FBgn0019928	-0.581916	5.07734	11.5772	0.000667639	0.00507954
FBgn0019929	0.201303	5.42006	10.3811	0.00127313	0.00842544
FBgn0019932	0.389561	6.09512	34.1962	4.98263e-09	2.78821e-07
FBgn0019936	0.0451184	9.71411	0.731804	0.392299	0.575011
FBgn0019938	0.0215419	6.1661	0.114514	0.735062	0.841992
FBgn0019940	-0.0537107	6.21554	0.971299	0.324356	0.505844
FBgn0019947	0.0456296	6.08773	1.04898	0.305743	0.489157
FBgn0019948	0.0775272	6.49418	3.43171	0.0639559	0.167127
FBgn0019949	0.0292293	4.40985	0.173403	0.677105	0.807386
FBgn0019952	0.054248	4.82981	0.430535	0.511726	0.681509
FBgn0019957	-0.233014	8.19706	13.9571	0.000187033	0.00184247
FBgn0019960	-0.00389097	8.53399	0.0132248	0.908446	0.952483
FBgn0019968	-0.188238	7.38868	15.48	8.33838e-05	0.00096166
FBgn0019972	0.0691059	5.53218	1.10519	0.293129	0.477048
FBgn0019982	0.174676	5.91189	7.18592	0.00734779	0.0333756
FBgn0019985	-0.0136756	3.06085	0.0131595	0.908671	0.952483
FBgn0019990	-0.265945	6.42421	28.3341	1.02084e-07	3.75645e-06
FBgn0020018	0.0777322	5.49677	1.67588	0.195473	0.364257
FBgn0020224	0.0357196	7.50054	0.501991	0.478627	0.651933
FBgn0020235	-0.3421	8.72315	13.4618	0.000243473	0.00226182
FBgn0020236	0.166833	9.5232	5.02356	0.0250047	0.0840192
FBgn0020238	0.0688464	9.52261	3.28074	0.0700972	0.178923
FBgn0020245	0.24021	5.89785	20.4751	6.04122e-06	0.000114715
FBgn0020248	0.216921	4.70382	1.81954	0.177368	0.341833
FBgn0020249	0.000995867	5.99685	0.000479523	0.982529	0.990853
FBgn0020251	-0.0203998	5.71412	0.149837	0.698691	0.820709
FBgn0020255	0.134383	8.89216	7.15069	0.0074935	0.0338748
FBgn0020257	0.00599212	5.65691	0.0145411	0.904019	0.949624
FBgn0020258	0.260753	1.20157	2.51035	0.1131	0.249513
FBgn0020261	-0.0676621	7.12316	1.91998	0.165858	0.326776
FBgn0020269	-0.138182	4.49522	3.46404	0.062717	0.164663
FBgn0020270	0.0756188	4.99306	0.916008	0.338525	0.520488
FBgn0020272	0.545267	4.26184	26.887	2.15705e-07	6.96218e-06
FBgn0020277	0.343569	1.02218	3.08481	0.0790263	0.195539
FBgn0020278	0.197012	5.92789	13.8253	0.000200614	0.00194785
FBgn0020279	-0.0241064	9.1727	0.281013	0.596038	0.748868
FBgn0020294	-0.115531	5.09741	2.93868	0.0864813	0.207156
FBgn0020299	-0.0461878	5.44175	0.649513	0.420287	0.600317
FBgn0020300	0.00178169	5.95556	0.000386393	0.984317	0.991764
FBgn0020304	-0.266269	7.76969	38.8925	4.47803e-10	3.61955e-08
FBgn0020305	-0.0432749	4.40114	0.210859	0.646095	0.784479
FBgn0020306	0.114369	9.32763	3.80301	0.0511605	0.142427
FBgn0020307	-0.0211991	4.65175	0.0738384	0.785828	0.876262
FBgn0020309	0.0896483	7.38551	1.92579	0.16522	0.325925
FBgn0020312	0.00482552	5.31396	0.00328082	0.954323	0.97646
FBgn0020369	0.166172	7.31882	11.2203	0.000809066	0.00590381
FBgn0020370	0.0591323	7.52121	1.82978	0.176153	0.340691
FBgn0020372	-0.135436	5.74352	5.09241	0.0240308	0.0815361
FBgn0020378	0.207743	3.5138	5.20954	0.0224633	0.0777298
FBgn0020379	-0.0603756	5.28659	1.17771	0.277822	0.461183
FBgn0020381	0.0191471	4.58816	0.0715612	0.789077	0.877815
FBgn0020385	0.433983	7.20725	14.023	0.000180592	0.00178833
FBgn0020386	-0.0257906	8.49006	0.333143	0.563814	0.724137
FBgn0020388	0.107212	5.59554	3.02907	0.0817848	0.200127
FBgn0020389	-0.257983	5.18049	11.2405	0.00080031	0.00585496
FBgn0020391	0.0989008	1.83222	0.613359	0.433526	0.61265
FBgn0020392	0.090087	6.67852	2.50469	0.113508	0.250161
FBgn0020407	-0.0604934	6.15192	1.41221	0.23469	0.411348
FBgn0020412	0.0241525	7.12591	0.239598	0.624497	0.769494
FBgn0020414	0.135775	7.40469	3.71368	0.0539682	0.147493
FBgn0020415	0.00250617	6.98792	0.00173823	0.966744	0.984017
FBgn0020416	0.113788	5.50817	1.53662	0.215121	0.389609
FBgn0020439	0.0449851	9.08965	1.02509	0.311316	0.494251
FBgn0020440	0.155572	6.18565	8.21157	0.0041624	0.0215692
FBgn0020443	0.0623834	8.3565	2.84238	0.0918083	0.215763
FBgn0020445	-0.0488802	6.19583	0.477264	0.489664	0.662198
FBgn0020493	0.174112	6.164	6.3682	0.0116183	0.0472148
FBgn0020496	0.00518945	8.53754	0.0117383	0.913723	0.955449
FBgn0020497	-0.148622	8.02494	9.64354	0.00190019	0.0116537
FBgn0020503	-0.143889	9.29024	8.45101	0.00364841	0.0195405
FBgn0020506	0.266521	3.66078	0.717764	0.396878	0.578139
FBgn0020508	0.296138	4.8827	2.65742	0.103068	0.233913
FBgn0020510	0.141909	6.37358	8.6109	0.00334157	0.0181567
FBgn0020521	-0.297481	6.46864	24.7562	6.50607e-07	1.77314e-05
FBgn0020545	0.155002	6.54206	1.19441	0.274443	0.457501
FBgn0020616	0.163593	5.74181	5.5631	0.0183429	0.0664888
FBgn0020617	-0.0406563	1.64244	0.0595206	0.807255	0.88841
FBgn0020618	0.114788	10.3286	3.08216	0.0791555	0.195744
FBgn0020620	0.0286727	6.69922	0.464419	0.495566	0.667392
FBgn0020621	0.0185844	7.69974	0.157324	0.691632	0.815862
FBgn0020622	0.0146614	7.2497	0.0648124	0.799045	0.884645
FBgn0020626	-0.063068	6.93953	2.43112	0.118948	0.258715
FBgn0020633	0.278168	6.49251	4.06812	0.0436999	0.126809
FBgn0020647	-0.00966032	7.86048	0.0604206	0.805832	0.887993
FBgn0020653	0.00970582	8.63259	0.0489028	0.824984	0.900733
FBgn0020655	-0.0986893	6.02643	2.93617	0.0866156	0.207373
FBgn0020660	0.18226	7.70592	12.1275	0.000496831	0.00398856
FBgn0020762	0.196447	4.43461	6.58129	0.0103056	0.0430859
FBgn0020764	-0.1451	8.01025	4.76609	0.0290257	0.0933977
FBgn0020766	-0.0716285	5.46795	1.3454	0.246084	0.423592
FBgn0020880	0.00332028	0.288256	0.000202752	0.988639	0.994423
FBgn0020887	-0.136731	6.65827	5.24681	0.0219871	0.0764456
FBgn0020906	-0.0345782	9.86354	0.0522816	0.81914	0.896598
FBgn0020907	-0.0735603	6.50951	1.06114	0.302954	0.486177
FBgn0020909	0.332444	4.06976	9.08603	0.0025757	0.0149557
FBgn0020910	0.125843	10.7223	6.30499	0.0120398	0.0484513
FBgn0020912	0.305223	5.03302	17.0258	3.68761e-05	0.000492666
FBgn0020930	-0.129583	5.64723	8.48021	0.0035903	0.0192589
FBgn0021750	0.0428296	3.78417	0.154321	0.69444	0.817949
FBgn0021760	-0.0554847	8.32085	1.12948	0.287887	0.47137
FBgn0021761	-0.0735322	6.43597	0.885845	0.346606	0.528856
FBgn0021764	0.0659334	6.98425	0.993673	0.318846	0.501262
FBgn0021765	0.0743544	6.69335	0.840671	0.359205	0.54101
FBgn0021767	-0.106408	2.20902	1.00322	0.316533	0.498992
FBgn0021768	-0.0211004	6.37181	0.210208	0.646604	0.784654
FBgn0021776	0.306638	2.75876	4.04385	0.0443326	0.128212
FBgn0021795	0.123829	6.58546	2.94034	0.0863923	0.207048
FBgn0021796	-0.109681	6.61525	4.26984	0.0387945	0.116065
FBgn0021800	-0.0767737	6.64051	2.2492	0.133684	0.281569
FBgn0021814	0.149023	4.64776	5.22108	0.0223146	0.0773285
FBgn0021818	-0.112462	6.63436	5.14452	0.0233198	0.0797886
FBgn0021825	0.073554	5.79695	2.66585	0.102523	0.233067
FBgn0021847	-0.0872072	5.78719	3.54182	0.0598398	0.158828
FBgn0021872	-0.00203529	8.72073	0.00295489	0.956649	0.977529
FBgn0021873	-0.0911374	7.39101	2.68886	0.101052	0.231001
FBgn0021874	0.123695	4.27204	1.89746	0.168363	0.330333
FBgn0021875	-0.254969	3.74702	7.83723	0.0051181	0.0253016
FBgn0021895	-0.0652387	6.6001	1.63341	0.201232	0.371835
FBgn0021906	-0.110508	9.14627	2.80767	0.0938147	0.219117
FBgn0021944	0.140918	5.81234	6.75023	0.00937358	0.0401476
FBgn0021953	0.126281	7.76058	5.34596	0.0207703	0.0730205
FBgn0021967	-0.129313	7.40953	4.4967	0.0339603	0.104914
FBgn0021979	0.0730647	7.87762	2.84034	0.0919247	0.215983
FBgn0021995	0.179012	5.85757	6.10628	0.0134702	0.0528143
FBgn0022023	-0.104351	8.03704	4.39398	0.036066	0.11006
FBgn0022027	0.144823	3.98408	3.11224	0.0777062	0.19333
FBgn0022029	0.0874316	5.89567	2.41671	0.120047	0.260506
FBgn0022069	0.00785187	6.95475	0.0264893	0.870711	0.928606
FBgn0022153	-0.102871	6.81889	5.03375	0.024858	0.0837486
FBgn0022160	-0.143399	8.94542	2.50058	0.113804	0.250487
FBgn0022213	0.264937	7.28504	21.2825	3.96338e-06	8.14818e-05
FBgn0022224	-0.224708	2.59178	3.90338	0.0481889	0.13624
FBgn0022238	0.0856559	7.48965	2.1729	0.140461	0.291239
FBgn0022246	0.236239	3.0121	4.31099	0.0378668	0.114156
FBgn0022288	-0.0116826	5.74273	0.0284948	0.865951	0.925517
FBgn0022338	-0.0825849	6.35564	0.885108	0.346806	0.528906
FBgn0022343	0.0886227	6.68823	3.04199	0.0811362	0.199154
FBgn0022344	-0.0856237	5.57549	2.0275	0.154475	0.310756
FBgn0022349	0.136241	7.19648	14.2598	0.000159232	0.00161054
FBgn0022355	0.534503	10.0649	4.96077	0.0259287	0.0860047
FBgn0022359	0.0732721	5.09139	0.3758	0.53986	0.703521
FBgn0022361	0.0136404	7.31726	0.0396516	0.842163	0.910767
FBgn0022382	-0.0672433	7.84202	1.38139	0.239865	0.416301
FBgn0022699	-0.291524	5.25813	27.1267	1.90544e-07	6.25686e-06
FBgn0022700	0.212911	2.84704	1.35866	0.24377	0.421218
FBgn0022702	-0.00537935	2.99716	0.00276437	0.958069	0.978134
FBgn0022708	-0.0455699	6.76529	0.901277	0.34244	0.524956
FBgn0022709	-0.0352813	7.56473	0.45571	0.499636	0.671268
FBgn0022710	-0.00868214	6.11196	0.0152673	0.901663	0.948185
FBgn0022720	-0.147418	6.41749	8.66693	0.00324036	0.0177133
FBgn0022724	-0.121759	4.63642	2.00978	0.156288	0.312959
FBgn0022764	0.109924	8.68035	3.59712	0.0578798	0.155062
FBgn0022768	-0.189233	7.78352	14.834	0.000117402	0.00126167
FBgn0022770	0.395417	2.62045	9.22797	0.00238345	0.0140701
FBgn0022772	0.075078	6.44832	0.656728	0.417718	0.597543
FBgn0022774	0.410975	4.45467	5.56725	0.0182995	0.0664331
FBgn0022786	-0.118787	5.43641	1.8859	0.169665	0.33213
FBgn0022787	-0.0503818	6.73661	1.10442	0.293298	0.477158
FBgn0022800	0.0748942	3.58728	0.87136	0.350579	0.532684
FBgn0022893	-0.261434	9.27642	19.0719	1.25885e-05	0.000206683
FBgn0022935	-0.0606812	5.67567	1.12897	0.287996	0.47137
FBgn0022936	0.0443457	4.82639	0.28044	0.596413	0.74914
FBgn0022942	0.149559	6.19196	7.0789	0.00779967	0.0350911
FBgn0022943	-0.0545497	4.20012	0.522705	0.46969	0.644121
FBgn0022959	0.00341504	9.22458	0.00547247	0.941029	0.970041
FBgn0022960	-0.110473	6.18124	2.80026	0.0942492	0.220078
FBgn0022981	-0.268982	4.3775	1.29853	0.254483	0.434177
FBgn0022984	0.0363197	5.67117	0.801657	0.370598	0.552753
FBgn0022985	-0.0639424	6.46183	1.33959	0.247107	0.425057
FBgn0022986	0.416053	5.5945	43.1058	5.18571e-11	6.05447e-09
FBgn0022987	-0.170867	6.21922	7.57173	0.00592909	0.0281766
FBgn0023000	0.389887	2.77285	6.17818	0.0129335	0.0512626
FBgn0023001	0.0980636	3.86298	1.82172	0.177108	0.341471
FBgn0023023	0.278605	5.33151	19.8002	8.59749e-06	0.000153408
FBgn0023076	-0.0533738	7.31409	0.474585	0.490886	0.663181
FBgn0023081	0.00276129	6.66701	0.00357643	0.952312	0.975266
FBgn0023083	-0.155595	6.09395	5.67792	0.0171798	0.0632175
FBgn0023090	0.043775	6.40865	0.191042	0.662051	0.796263
FBgn0023095	-0.0887657	6.29589	2.97473	0.0845741	0.204035
FBgn0023096	-0.191069	1.43303	1.62939	0.201787	0.372643
FBgn0023097	0.115702	7.00864	3.94515	0.0470067	0.133617
FBgn0023129	-0.0534815	7.25462	0.26299	0.608074	0.758048
FBgn0023130	0.028107	4.12248	0.0656846	0.797727	0.883902
FBgn0023143	0.0114274	9.37472	0.0862843	0.768955	0.864155
FBgn0023167	0.334872	5.65135	13.8882	0.000194013	0.00190133
FBgn0023169	0.0505088	7.58904	1.68067	0.194836	0.36364
FBgn0023170	0.143657	8.31411	4.35277	0.0369489	0.112139
FBgn0023171	-0.136171	5.20405	5.00653	0.0252519	0.0846232
FBgn0023172	-0.0980124	8.27547	2.75956	0.0966751	0.224251
FBgn0023174	0.115945	7.37308	8.58603	0.00338752	0.0183586
FBgn0023175	0.118884	7.22705	6.57596	0.0103365	0.043177
FBgn0023177	-0.0079354	6.1724	0.00997406	0.920447	0.959696
FBgn0023178	0.0452588	3.21763	0.278106	0.597945	0.750268
FBgn0023179	-0.000209927	5.61752	1.91149e-05	0.996512	0.998306
FBgn0023180	0.307279	3.54133	1.55223	0.212807	0.387394
FBgn0023181	0.353554	4.14005	2.32226	0.127535	0.271949
FBgn0023197	0.360343	9.00975	5.28693	0.0214861	0.0750348
FBgn0023211	0.0462214	6.15788	1.3822	0.239727	0.416301
FBgn0023212	0.0912799	7.36195	5.05635	0.0245359	0.0828405
FBgn0023213	-0.0622696	9.61125	0.756113	0.384548	0.566989
FBgn0023214	0.141698	1.75456	1.10026	0.29421	0.47823
FBgn0023215	0.138992	8.02753	2.57522	0.108549	0.24211
FBgn0023216	-0.122421	5.59775	3.06507	0.0799918	0.19736
FBgn0023388	-0.096787	6.7155	4.79089	0.0286106	0.0924395
FBgn0023395	-0.0908486	5.32286	0.661684	0.415966	0.596029
FBgn0023407	-0.104094	7.25227	2.87959	0.089709	0.212215
FBgn0023423	0.000503829	7.86939	0.000145987	0.99036	0.994698
FBgn0023441	0.189775	8.26748	19.5207	9.95167e-06	0.000170186
FBgn0023458	-0.0168506	8.11322	0.0853276	0.770203	0.864987
FBgn0023477	0.376611	7.70527	13.4618	0.000243473	0.00226182
FBgn0023479	0.0713561	8.90427	1.27994	0.257911	0.437657
FBgn0023489	-0.100798	2.38458	0.99311	0.318984	0.501262
FBgn0023495	1.44898	1.72593	10.4532	0.00122438	0.00816105
FBgn0023506	0.0641226	5.10947	0.968586	0.325033	0.506231
FBgn0023507	0.312554	6.98781	17.4916	2.88578e-05	0.000404309
FBgn0023508	-0.0127712	6.48648	0.0764401	0.782181	0.873328
FBgn0023510	-0.107025	6.3816	3.64058	0.0563873	0.152141
FBgn0023511	0.220362	5.34503	16.5892	4.64156e-05	0.000598843
FBgn0023512	-0.0741805	5.58986	1.72	0.189693	0.356859
FBgn0023513	0.0572281	4.68335	0.399942	0.527119	0.694092
FBgn0023514	0.180151	4.98107	4.39019	0.0361462	0.110198
FBgn0023515	-0.0597018	7.43272	0.645224	0.421825	0.601418
FBgn0023516	-0.0132622	5.73516	0.078454	0.779404	0.871667
FBgn0023517	-0.142823	5.30407	4.57779	0.032389	0.101157
FBgn0023518	-0.0829309	6.56018	2.05268	0.151938	0.307288
FBgn0023519	0.219948	4.70491	8.17787	0.00424045	0.021842
FBgn0023520	0.0137453	3.17647	0.0189544	0.890497	0.940102
FBgn0023521	-0.0632945	4.06401	0.565018	0.452245	0.628247
FBgn0023522	0.0305581	5.95946	0.34429	0.557363	0.718314
FBgn0023524	-0.619114	3.34024	46.3987	9.64784e-12	1.34176e-09
FBgn0023525	0.103606	4.36975	2.35992	0.124488	0.26714
FBgn0023526	0.298909	6.79736	19.3835	1.06925e-05	0.000180569
FBgn0023527	0.0359627	5.72433	0.172983	0.677474	0.807623
FBgn0023528	0.0181103	7.671	0.10074	0.750944	0.852542
FBgn0023529	-0.049946	7.98339	1.00336	0.3165	0.498992
FBgn0023530	0.1102	4.59611	2.10459	0.146857	0.300214
FBgn0023531	-0.175791	6.11565	6.49746	0.0108029	0.0446907
FBgn0023534	0.333252	1.92982	7.66227	0.00563874	0.027145
FBgn0023535	-0.00322181	5.04931	0.00112362	0.97326	0.98682
FBgn0023536	0.0853747	4.99622	2.30537	0.128928	0.27424
FBgn0023537	0.206915	7.74686	9.92408	0.0016313	0.0103399
FBgn0023540	0.238383	7.26868	9.20061	0.00241934	0.0142553
FBgn0023541	-0.260871	4.43717	2.48253	0.115117	0.252589
FBgn0023542	0.292636	5.2199	21.3211	3.88426e-06	8.07329e-05
FBgn0023545	0.159842	4.73266	7.31773	0.00682776	0.0315438
FBgn0023549	-0.0263714	6.3523	0.199575	0.655064	0.791079
FBgn0023550	0.228512	5.21297	0.923052	0.336675	0.518387
FBgn0024150	-0.183405	2.75367	3.546	0.0596893	0.158562
FBgn0024177	-0.0939078	6.50187	0.28538	0.593197	0.746919
FBgn0024179	0.162527	5.85312	6.522	0.0106548	0.0442522
FBgn0024182	-0.0426367	4.56064	0.281896	0.595461	0.748393
FBgn0024183	0.0641727	8.29763	1.93963	0.163708	0.323889
FBgn0024184	0.00920691	2.64163	0.00678945	0.93433	0.967001
FBgn0024187	-0.0176582	6.99109	0.221829	0.63765	0.778552
FBgn0024188	-0.03828	6.2573	0.397581	0.528341	0.69483
FBgn0024189	-0.279193	4.18511	10.7115	0.00106471	0.00734962
FBgn0024191	-0.272978	4.37493	9.16892	0.00246159	0.0144305
FBgn0024194	0.289779	3.38376	6.03846	0.0139975	0.0541852
FBgn0024196	0.178123	3.99015	4.81769	0.028169	0.0912309
FBgn0024222	-0.025261	5.48739	0.109966	0.740182	0.845501
FBgn0024227	0.135746	4.37465	1.36865	0.242044	0.418981
FBgn0024230	0.0617173	5.17974	1.00425	0.316284	0.498844
FBgn0024232	-0.159751	4.20975	4.49626	0.0339692	0.104914
FBgn0024234	0.110995	5.29021	5.33173	0.0209406	0.0734551
FBgn0024236	-0.058647	7.57845	2.48205	0.115152	0.252608
FBgn0024238	0.17932	7.66516	17.7214	2.55737e-05	0.000366995
FBgn0024245	-0.156258	3.74947	2.31778	0.127903	0.272611
FBgn0024248	-0.0830431	6.35081	2.28556	0.130583	0.276703
FBgn0024250	0.0765426	4.20795	0.775942	0.378385	0.560261
FBgn0024251	0.00760453	7.63224	0.030419	0.861543	0.922824
FBgn0024273	0.142917	6.32094	11.0839	0.000870821	0.00624837
FBgn0024277	-0.0703424	7.53685	2.70891	0.0997894	0.228944
FBgn0024285	-0.124786	6.26776	4.75957	0.0291359	0.0936249
FBgn0024288	0.068009	0.939803	0.205458	0.650351	0.787096
FBgn0024289	1.36884	6.93414	23.9991	9.63831e-07	2.48364e-05
FBgn0024291	-0.00187887	7.14942	0.00163633	0.967733	0.984388
FBgn0024293	0.0703302	7.83808	1.09572	0.295207	0.478781
FBgn0024294	-0.142351	2.61531	0.875341	0.349481	0.531443
FBgn0024314	-0.0551464	6.41526	1.20829	0.271672	0.454323
FBgn0024315	0.0813562	7.80833	1.72444	0.189123	0.35644
FBgn0024320	0.0542634	7.0328	0.580389	0.44616	0.623885
FBgn0024326	0.0849076	6.56901	3.76432	0.052357	0.144651
FBgn0024329	0.0717635	7.38791	2.01143	0.156118	0.312821
FBgn0024330	-0.0278569	4.63352	0.116276	0.733109	0.840772
FBgn0024332	-0.261812	6.22672	4.12395	0.0422803	0.12395
FBgn0024352	-0.176663	7.87959	15.0945	0.000102263	0.00112979
FBgn0024360	-0.0722629	4.95865	0.968737	0.324995	0.506231
FBgn0024361	0.430886	4.25806	21.3625	3.8013e-06	7.9533e-05
FBgn0024362	0.0257324	6.5913	0.364876	0.545811	0.708445
FBgn0024364	0.162784	5.73763	4.25409	0.0391559	0.116924
FBgn0024365	0.0969198	6.34367	3.86414	0.0493285	0.138633
FBgn0024366	0.219211	2.25763	1.56573	0.210828	0.38468
FBgn0024371	-0.016554	5.81905	0.0701127	0.791173	0.878819
FBgn0024432	-0.0473735	6.6307	0.751836	0.385896	0.568002
FBgn0024491	-0.202166	4.49266	5.91373	0.0150233	0.0570126
FBgn0024509	0.0693035	6.64828	1.91926	0.165939	0.326866
FBgn0024510	0.0839875	4.88106	1.0794	0.298832	0.482756
FBgn0024542	0.0537794	4.32633	0.425264	0.514322	0.683715
FBgn0024555	0.0834669	7.66033	3.21484	0.0729734	0.184127
FBgn0024556	-0.0637987	6.90411	1.35576	0.244274	0.421612
FBgn0024558	0.186873	5.9943	6.83807	0.0089235	0.0386399
FBgn0024689	-0.0604684	5.09414	0.989012	0.319984	0.502096
FBgn0024698	-0.067027	5.25631	0.970374	0.324587	0.505921
FBgn0024728	-0.0597116	6.44613	0.951872	0.329243	0.510938
FBgn0024732	-0.190658	6.05162	7.95921	0.00478434	0.0239775
FBgn0024733	0.196939	10.3849	13.4329	0.000247243	0.00228779
FBgn0024734	0.00546034	8.59226	0.00589663	0.938791	0.968935
FBgn0024740	-0.000983806	1.94909	4.38064e-05	0.994719	0.99763
FBgn0024754	0.194473	5.93344	15.2862	9.23877e-05	0.00104013
FBgn0024806	-0.16838	6.93291	6.92563	0.00849692	0.0372533
FBgn0024811	0.115425	6.68037	3.00246	0.0831381	0.202141
FBgn0024814	0.159833	6.51618	6.71412	0.00956525	0.0407838
FBgn0024833	-0.00140564	6.28552	0.000850235	0.976738	0.988287
FBgn0024836	-0.266868	3.28556	4.42732	0.035368	0.108407
FBgn0024841	0.0916453	5.12287	1.33713	0.24754	0.425557
FBgn0024846	-0.00664248	5.23701	0.0125678	0.910739	0.953277
FBgn0024887	-0.0107622	4.54698	0.0263663	0.871009	0.928651
FBgn0024889	-0.0410387	6.73844	0.688433	0.406698	0.587377
FBgn0024891	0.0597822	5.82357	1.54858	0.213345	0.387936
FBgn0024909	-0.129665	5.25165	3.46992	0.0624944	0.164169
FBgn0024912	0.361008	2.77197	8.08861	0.00445444	0.0226898
FBgn0024920	-0.201067	4.54849	2.7557	0.0969086	0.224364
FBgn0024921	0.024878	7.94171	0.207697	0.648579	0.785957
FBgn0024941	-0.250172	3.19055	5.98251	0.0144484	0.0555893
FBgn0024943	0.0117915	5.80913	0.0425053	0.83666	0.90712
FBgn0024944	0.0508653	3.74508	0.300063	0.583843	0.739441
FBgn0024945	0.134256	5.15585	5.27389	0.0216476	0.0754671
FBgn0024947	0.116409	7.37799	6.11289	0.01342	0.0526608
FBgn0024956	0.174068	4.62924	4.40477	0.0358386	0.109578
FBgn0024957	0.257706	7.18018	18.304	1.88314e-05	0.000289153
FBgn0024958	0.0164636	5.97907	0.0934606	0.759823	0.858175
FBgn0024963	-0.23661	7.47524	6.36801	0.0116196	0.0472148
FBgn0024973	-0.00594862	5.7888	0.00875427	0.925455	0.962502
FBgn0024975	-0.0538692	4.05572	0.298113	0.585068	0.740133
FBgn0024977	-0.482738	1.12459	4.0579	0.0439652	0.127357
FBgn0024980	0.170344	3.81757	4.0029	0.0454221	0.130208
FBgn0024983	-0.124309	5.28123	5.38433	0.0203184	0.0718054
FBgn0024985	-0.0590942	6.64889	2.39073	0.122057	0.263417
FBgn0024986	0.0923272	4.92252	1.58601	0.207898	0.380877
FBgn0024987	-0.0865822	6.04585	1.63579	0.200904	0.371302
FBgn0024989	-0.405225	2.70006	4.31206	0.0378431	0.11412
FBgn0024991	0.0365431	5.92704	0.271225	0.602511	0.753896
FBgn0024992	0.0911331	6.24717	3.22302	0.0726096	0.183356
FBgn0024993	0.0434801	4.4127	0.123942	0.724798	0.83597
FBgn0024994	-0.153637	4.90597	4.58527	0.0322478	0.100856
FBgn0024995	0.213658	5.20238	7.00473	0.00812945	0.036111
FBgn0024996	0.090853	5.49955	2.52425	0.112108	0.247943
FBgn0024997	-0.118529	4.48029	1.97502	0.159916	0.318401
FBgn0024998	0.117465	4.80372	1.86036	0.172583	0.335963
FBgn0025109	-0.0662263	5.13464	1.38177	0.2398	0.416301
FBgn0025111	-0.0904619	6.29105	2.53171	0.111579	0.247063
FBgn0025117	-0.0594699	8.16084	2.34571	0.125628	0.269073
FBgn0025140	0.31335	6.49169	18.1714	2.01891e-05	0.000305975
FBgn0025185	-0.0400724	3.8467	0.12855	0.71994	0.833679
FBgn0025186	-0.0194449	6.50692	0.140488	0.707796	0.825538
FBgn0025286	0.205753	9.72737	16.0145	6.28607e-05	0.000759226
FBgn0025335	0.110885	5.87003	3.76715	0.0522686	0.144491
FBgn0025336	-0.0347575	5.13279	0.211635	0.645489	0.784293
FBgn0025352	0.131032	7.34951	5.18712	0.0227549	0.0784517
FBgn0025355	-0.141139	5.47374	3.16495	0.0752349	0.188576
FBgn0025360	0.0535683	3.97972	0.282236	0.59524	0.748393
FBgn0025366	0.0698766	7.05768	2.0652	0.150696	0.305297
FBgn0025373	-0.0695751	5.81077	1.46903	0.225498	0.401711
FBgn0025381	0.103356	5.7098	2.25677	0.133031	0.28057
FBgn0025382	0.0690198	1.57665	0.254949	0.613612	0.762037
FBgn0025383	0.295028	-0.45693	1.117	0.290564	0.474425
FBgn0025390	0.0389269	6.80307	0.0426991	0.836293	0.907048
FBgn0025391	-0.286263	3.33286	16.0519	6.16307e-05	0.000745321
FBgn0025393	-0.130205	0.6095	0.327085	0.567381	0.726472
FBgn0025394	0.0548506	6.49154	1.17017	0.279366	0.462168
FBgn0025454	-0.3804	10.8146	16.4061	5.11216e-05	0.000648066
FBgn0025455	-0.176727	7.89714	15.8065	7.01629e-05	0.000832535
FBgn0025456	0.123566	5.75366	4.38298	0.0362996	0.110594
FBgn0025457	-0.0905056	5.89488	2.09644	0.147643	0.301177
FBgn0025463	0.174639	6.37796	6.59242	0.0102414	0.0428741
FBgn0025469	0.00198212	4.34114	0.0010805	0.973778	0.98682
FBgn0025519	-0.116235	4.98687	3.04929	0.0807725	0.198533
FBgn0025525	-0.166862	5.68807	6.36753	0.0116227	0.0472148
FBgn0025549	-0.14681	6.18732	1.69179	0.193365	0.361801
FBgn0025558	0.124354	3.17461	1.17262	0.278864	0.461536
FBgn0025571	-0.123437	6.69634	6.04468	0.0139483	0.0540389
FBgn0025574	0.166607	6.52003	8.20517	0.00417713	0.0216052
FBgn0025582	-0.0185785	7.99006	0.1575	0.691469	0.815862
FBgn0025583	0.176646	6.06521	1.24635	0.264251	0.445697
FBgn0025592	0.423791	6.00083	44.6681	2.33433e-11	2.94344e-09
FBgn0025595	0.464175	5.5234	38.4237	5.69375e-10	4.43129e-08
FBgn0025608	-0.0185147	7.09809	0.251478	0.616036	0.763546
FBgn0025615	-0.0401686	4.71741	0.468893	0.493497	0.665953
FBgn0025620	0.312464	6.44441	10.2465	0.00136946	0.00895457
FBgn0025621	-0.0894402	5.78149	2.19721	0.138261	0.288383
FBgn0025624	0.18473	4.38845	7.20448	0.00727219	0.0331118
FBgn0025625	0.0199869	4.80707	0.107746	0.742725	0.846783
FBgn0025626	-0.0629187	6.59284	1.01026	0.314839	0.497733
FBgn0025628	0.192087	7.40709	9.18859	0.00243529	0.0143225
FBgn0025629	-0.0982608	4.02414	1.23744	0.265965	0.44747
FBgn0025630	-0.00239319	4.04523	0.00092862	0.97569	0.9877
FBgn0025631	0.186702	5.56488	12.59	0.000387811	0.00330219
FBgn0025632	-0.218035	3.15852	6.74309	0.00941115	0.0402538
FBgn0025633	0.101389	7.62394	2.5838	0.107962	0.241314
FBgn0025634	-0.0574124	4.70151	0.617352	0.432033	0.611729
FBgn0025635	0.107276	5.49035	1.39198	0.238072	0.414588
FBgn0025637	0.0342855	6.78984	0.700187	0.402721	0.583564
FBgn0025638	0.0969842	6.18387	3.11166	0.0777338	0.19333
FBgn0025639	0.00347463	7.57567	0.00417463	0.948483	0.973344
FBgn0025640	0.0841753	5.65545	1.55244	0.212776	0.387394
FBgn0025641	-0.0381815	7.06001	0.641914	0.423019	0.602301
FBgn0025643	0.465273	3.8211	17.0846	3.5751e-05	0.000480252
FBgn0025674	0.121413	6.00332	5.38239	0.020341	0.0718326
FBgn0025676	-0.296471	0.891022	1.45175	0.228247	0.404852
FBgn0025678	-0.208516	7.06152	11.0457	0.000888935	0.00636386
FBgn0025680	0.243766	6.25071	9.25065	0.00235412	0.013923
FBgn0025681	-0.156902	7.1047	13.5735	0.000229398	0.00215862
FBgn0025682	-0.15626	6.19961	6.50474	0.0107587	0.0445283
FBgn0025683	0.271917	9.4943	42.082	8.75264e-11	9.4061e-09
FBgn0025684	0.11051	4.96332	2.38435	0.122556	0.264192
FBgn0025686	0.404089	2.93913	12.5467	0.000396904	0.00334241
FBgn0025687	0.559045	4.57875	12.1539	0.000489844	0.00396275
FBgn0025692	0.165639	4.40311	2.49555	0.114169	0.250992
FBgn0025693	-0.0133978	5.02075	0.0462264	0.829765	0.903881
FBgn0025697	0.00386131	5.87914	0.00429936	0.947721	0.973055
FBgn0025700	0.0258821	6.97004	0.206704	0.649363	0.786504
FBgn0025702	-0.0382455	5.9575	0.398808	0.527706	0.694536
FBgn0025709	0.688779	5.17083	16.6969	4.38525e-05	0.000569661
FBgn0025712	-0.219652	5.31923	11.9328	0.000551541	0.00433576
FBgn0025716	0.0147236	5.14686	0.0461518	0.8299	0.903881
FBgn0025720	-0.0357872	5.43614	0.443378	0.505497	0.676439
FBgn0025724	0.0448999	7.06334	1.09657	0.29502	0.478724
FBgn0025725	-0.152621	7.20278	15.3678	8.84824e-05	0.00100454
FBgn0025726	-0.160981	7.55857	2.00425	0.156859	0.313619
FBgn0025739	-0.312343	0.924732	3.54622	0.0596812	0.158562
FBgn0025740	0.0478751	7.0686	0.300718	0.583433	0.73927
FBgn0025741	-0.11353	8.61527	2.51114	0.113044	0.249489
FBgn0025742	0.0879261	5.50537	2.34414	0.125755	0.269248
FBgn0025743	0.0610049	6.90652	1.31157	0.25211	0.431062
FBgn0025777	-0.0766008	6.843	2.73446	0.0982048	0.226325
FBgn0025781	-0.126716	5.44372	3.68105	0.055034	0.149256
FBgn0025790	-0.0071375	5.69336	0.0198475	0.887964	0.93865
FBgn0025800	-0.0948909	5.60609	2.31329	0.128272	0.273091
FBgn0025802	-0.0179934	6.19274	0.118067	0.731141	0.839737
FBgn0025806	-0.0212893	5.88882	0.121383	0.727539	0.837024
FBgn0025807	-0.150206	3.73689	1.97804	0.159597	0.317882
FBgn0025808	0.0170058	4.13216	0.0259771	0.871956	0.929137
FBgn0025809	-0.283875	4.55953	11.1816	0.000826133	0.00598994
FBgn0025814	0.143014	7.40532	4.25263	0.0391895	0.116987
FBgn0025815	-0.133388	6.36572	1.72677	0.188824	0.356286
FBgn0025820	0.0973347	3.57289	1.43552	0.230866	0.407789
FBgn0025825	0.141864	4.8287	4.17645	0.0409895	0.121023
FBgn0025827	0.0783799	4.49405	1.27695	0.258466	0.438128
FBgn0025830	-0.0270524	4.97159	0.138505	0.709772	0.826745
FBgn0025832	-0.219767	4.99987	3.95783	0.0466537	0.132923
FBgn0025833	-0.109992	2.56399	0.90357	0.341826	0.524185
FBgn0025836	0.0781972	7.14471	3.10676	0.0779677	0.193621
FBgn0025839	-0.0791799	6.44506	0.968668	0.325013	0.506231
FBgn0025864	0.101213	7.81201	4.75395	0.0292311	0.0937109
FBgn0025865	0.128011	6.21259	6.33591	0.0118317	0.0479609
FBgn0025866	0.0450147	6.45755	0.724826	0.394566	0.576979
FBgn0025874	-0.1536	4.04266	3.59968	0.0577906	0.154917
FBgn0025878	-0.00674754	3.36598	0.00613162	0.937586	0.968439
FBgn0025879	0.323352	6.17219	35.8735	2.10554e-09	1.34541e-07
FBgn0025885	0.259941	7.82213	21.7907	3.04076e-06	6.61067e-05
FBgn0025936	0.047819	7.4001	0.614337	0.433159	0.61265
FBgn0026015	-0.101216	6.195	4.0298	0.0447033	0.12901
FBgn0026056	0.0305394	5.19556	0.254063	0.614228	0.762322
FBgn0026059	-0.206104	7.56865	30.918	2.69162e-08	1.20638e-06
FBgn0026060	0.161221	6.22199	9.55101	0.0019984	0.0121458
FBgn0026061	-0.222307	6.65743	12.0859	0.000508041	0.00405789
FBgn0026064	-0.469689	2.35521	22.9059	1.70127e-06	4.0893e-05
FBgn0026076	-0.133584	6.38265	7.62602	0.00575322	0.0275206
FBgn0026077	-0.518858	4.77021	9.53504	0.00201586	0.0122284
FBgn0026079	-0.000877795	5.80485	0.000187528	0.989074	0.994633
FBgn0026080	-0.21359	5.1343	11.5439	0.000679706	0.00515889
FBgn0026083	-0.121536	8.4784	4.34424	0.0371342	0.112485
FBgn0026084	0.234136	8.36753	17.2597	3.26033e-05	0.000444919
FBgn0026085	-0.0050483	3.58936	0.00208175	0.963608	0.982093
FBgn0026086	-0.291621	7.15	24.4583	7.59374e-07	2.0116e-05
FBgn0026088	0.142933	5.01831	4.87624	0.0272289	0.0892252
FBgn0026089	-0.0427896	4.33157	0.263352	0.607826	0.75804
FBgn0026090	0.0335011	4.93059	0.218995	0.639807	0.780326
FBgn0026143	0.145347	6.4332	3.56549	0.0589922	0.157418
FBgn0026144	-0.272727	6.6335	4.8731	0.0272785	0.0892949
FBgn0026147	-0.113295	8.25775	6.89505	0.0086435	0.03775
FBgn0026148	-0.339911	3.5596	11.1522	0.000839306	0.00606365
FBgn0026149	-0.0099324	4.99204	0.0158902	0.899687	0.946739
FBgn0026150	-0.146082	5.68965	7.80752	0.00520294	0.0256673
FBgn0026160	-0.0538827	7.77901	0.723292	0.395066	0.57701
FBgn0026176	-0.168014	4.90643	5.78469	0.0161663	0.0604035
FBgn0026179	-0.0379022	7.25789	0.592345	0.441514	0.619945
FBgn0026181	0.00167408	7.45522	0.00101298	0.97461	0.987177
FBgn0026189	0.0202838	7.57279	0.214498	0.643265	0.782828
FBgn0026190	0.407125	1.65294	5.19346	0.0226721	0.0781946
FBgn0026192	0.137337	6.91444	6.99156	0.00818947	0.0362923
FBgn0026196	0.515912	7.00706	45.9522	1.21175e-11	1.63708e-09
FBgn0026197	0.25331	6.78398	6.85117	0.00885834	0.0384579
FBgn0026199	0.0565266	6.50492	0.547899	0.459177	0.634674
FBgn0026206	-0.135022	7.80276	2.3342	0.12656	0.27048
FBgn0026207	-0.0173868	5.57062	0.108361	0.742018	0.846606
FBgn0026239	-0.193279	6.64902	13.1863	0.000282006	0.00254479
FBgn0026250	-0.0164521	8.67835	0.156146	0.69273	0.816698
FBgn0026252	0.0261519	8.82392	0.443224	0.50557	0.676439
FBgn0026255	-0.117645	4.64205	2.62372	0.105277	0.237218
FBgn0026257	0.0734043	5.01716	0.478121	0.489275	0.661861
FBgn0026259	-0.107285	8.31668	8.01451	0.00464041	0.023405
FBgn0026261	-0.0794831	5.08675	1.31526	0.251445	0.430313
FBgn0026262	0.0402202	8.08061	0.314667	0.57483	0.732026
FBgn0026263	-0.12783	5.00665	1.08448	0.297698	0.481582
FBgn0026268	0.0652944	4.64077	0.935432	0.333455	0.515107
FBgn0026309	-0.012695	4.80817	0.0350737	0.851441	0.916572
FBgn0026313	-0.157508	6.55439	10.5982	0.00113197	0.0076849
FBgn0026314	-0.258208	6.37994	8.2295	0.00412148	0.0214394
FBgn0026315	0.139238	3.45251	1.66315	0.197179	0.36635
FBgn0026316	0.177395	6.68601	18.1438	2.0483e-05	0.000309933
FBgn0026317	-0.105731	6.79947	3.9284	0.0474772	0.13455
FBgn0026318	0.0961796	4.8788	2.06658	0.150559	0.305152
FBgn0026319	-0.086279	3.1639	0.859568	0.35386	0.535791
FBgn0026323	0.0304802	6.77499	0.40094	0.526604	0.693703
FBgn0026324	0.140234	4.38696	3.3675	0.0664944	0.172561
FBgn0026326	-0.0392588	5.93084	0.433707	0.510175	0.680498
FBgn0026361	-0.0889517	3.64438	0.62079	0.430754	0.610329
FBgn0026369	-0.0085299	6.90705	0.0383749	0.844692	0.912214
FBgn0026370	-0.190941	8.63084	20.1023	7.34091e-06	0.000135592
FBgn0026371	0.109521	5.12146	2.02639	0.154587	0.310851
FBgn0026372	0.178892	10.5822	15.5058	8.22537e-05	0.000950945
FBgn0026373	-0.0300119	4.36789	0.098273	0.753912	0.854476
FBgn0026374	-0.0692681	3.66875	0.520077	0.470809	0.645086
FBgn0026375	0.0539919	7.74106	1.28255	0.257426	0.437227
FBgn0026376	0.00617413	5.85935	0.0142061	0.905125	0.950558
FBgn0026378	0.207912	4.31168	6.28323	0.0121886	0.0489697
[truncated: 7,458 more rows]

## Sheet: sex-bias
Gene_ID	logFC	logCPM	LR	PValue	padj
dsim_PG00010	-1.33202	0.332881	32.5975	1.13361e-08	1.31994e-08
dsim_PG00026	1.69808	4.36951	859.995	4.88145e-189	1.66356e-188
dsim_PG00027	2.62958	4.26153	1817.99	0	0
dsim_PG00028	-0.521197	4.66017	72.1327	2.01201e-17	2.54857e-17
dsim_PG00029	-1.64939	8.13713	1153.14	9.3399e-253	4.21611e-252
dsim_PG00034	-8.15805	7.87321	4120.32	0	0
dsim_PG00041	-1.5095	4.64396	157.514	3.95296e-36	5.81386e-36
dsim_PG00042	0.986315	3.97905	125.428	4.10206e-29	5.7217e-29
dsim_PG00043	0.847797	0.457172	15.3553	8.90694e-05	9.86334e-05
dsim_PG00044	1.9094	2.39738	355.534	2.64285e-79	5.10904e-79
dsim_PG00056	-1.96727	2.39141	329.162	1.46324e-73	2.74235e-73
dsim_PG00062	-2.02872	3.35399	464.66	4.65303e-103	1.03954e-102
dsim_PG00064	2.24667	0.619646	143.279	5.10767e-33	7.33424e-33
dsim_PG00074	-2.02812	2.12415	280.203	6.78146e-63	1.19739e-62
dsim_PG00076	-1.15797	2.35224	207.246	5.4804e-47	8.70475e-47
dsim_PG00099	-1.13423	-0.303796	20.1627	7.11275e-06	7.99635e-06
dsim_PG00100	1.24011	4.72674	388.875	1.45509e-86	2.9416e-86
dsim_PG00108	-1.01513	3.168	64.2727	1.08335e-15	1.35055e-15
dsim_PG00121	-1.92313	6.35289	428.58	3.3102e-95	7.0474e-95
dsim_PG00127	1.3958	3.61312	441.519	5.0576e-98	1.09878e-97
dsim_PG00129	-1.69538	3.58614	586.803	1.24229e-129	3.17694e-129
dsim_PG00140	-0.785005	1.78088	44.7683	2.21785e-11	2.65631e-11
dsim_PG00141	-1.84956	3.5368	438.208	2.65805e-97	5.7404e-97
dsim_PG00147	-1.52871	1.27532	135.87	2.13013e-31	3.02154e-31
dsim_PG00150	-2.0318	2.75941	505.157	7.1761e-112	1.67525e-111
dsim_PG00171	1.18574	4.14089	205.876	1.09037e-46	1.72811e-46
dsim_PG00172	-1.19299	0.371823	58.6001	1.9321e-14	2.38505e-14
dsim_PG00174	-1.95774	3.65296	577.249	1.48723e-127	3.75761e-127
dsim_PG00175	0.00576585	4.26072	0.00830133	0.927404	0.929468
dsim_PG00176	-0.683141	0.516963	20.0523	7.53538e-06	8.46644e-06
dsim_PG00177	-1.29129	6.90727	45.1233	1.85008e-11	2.21921e-11
dsim_PG00182	1.6648	3.57887	618.064	1.97147e-136	5.23272e-136
dsim_PG00183	-1.80835	5.27402	626.584	2.76549e-138	7.40466e-138
dsim_PG00184	-1.70514	2.22484	230.3	5.12703e-52	8.42948e-52
dsim_PG00187	-2.39098	2.86955	914.448	7.09752e-201	2.54923e-200
dsim_PG00188	-5.23271	3.70017	2016.8	0	0
dsim_PG00190	0.393966	4.7007	31.9142	1.61131e-08	1.87293e-08
dsim_PG00191	-1.48358	2.8625	432.998	3.61799e-96	7.75154e-96
dsim_PG00196	0.544987	2.94101	45.8213	1.29546e-11	1.55551e-11
dsim_PG00198	-2.18775	1.31622	246.124	1.81752e-55	3.05407e-55
dsim_PG00200	-1.66907	0.200208	89.9088	2.49398e-21	3.26805e-21
dsim_PG00201	-1.44849	1.46732	180.129	4.54179e-41	6.8855e-41
dsim_PG00202	-1.19006	1.15421	79.0759	5.977e-19	7.6737e-19
dsim_PG00207	-5.27527	4.58045	5425.5	0	0
dsim_PG00226	-1.86981	1.21594	169.039	1.19948e-38	1.79174e-38
dsim_PG00228	-0.526788	1.23669	9.13089	0.0025133	0.00271886
dsim_PG00237	0.0572776	2.68837	0.59281	0.441335	0.450092
dsim_PG00238	-1.3646	5.82856	264.191	2.09397e-59	3.60442e-59
dsim_PG00243	-1.42064	3.13035	192.495	9.07371e-44	1.40419e-43
dsim_PG00245	-1.41079	1.32712	134.538	4.16694e-31	5.9001e-31
dsim_PG00247	0.509104	4.55602	54.1167	1.88928e-13	2.31317e-13
dsim_PG00249	-2.52085	3.47254	171.437	3.59138e-39	5.38251e-39
dsim_PG00250	-2.25702	3.17273	259.899	1.80499e-58	3.09235e-58
dsim_PG00255	-1.59399	5.22016	305.062	2.59997e-68	4.7339e-68
dsim_PG00257	-2.15008	4.38441	349.666	5.01116e-78	9.61855e-78
dsim_PG00258	-0.558904	2.11581	46.1675	1.08565e-11	1.30457e-11
dsim_PG00261	-1.3165	4.18541	36.2133	1.76856e-09	2.08129e-09
dsim_PG00265	-0.681475	0.920532	26.1767	3.11567e-07	3.56416e-07
dsim_PG00272	-0.829439	4.0875	23.3561	1.34613e-06	1.52697e-06
dsim_PG00275	-0.246435	6.85833	15.3416	8.97184e-05	9.93405e-05
dsim_PG00276	0.115129	1.95447	1.26775	0.26019	0.267633
dsim_PG00278	-1.09871	4.23283	99.8212	1.66797e-23	2.22797e-23
FBgn0000008	0.773727	5.21701	255.034	2.07551e-57	3.53023e-57
FBgn0000014	-1.0969	4.44802	204.69	1.97921e-46	3.13366e-46
FBgn0000015	-2.1325	4.34339	1387.46	1.11336e-303	6.13582e-303
FBgn0000017	1.21487	7.24849	875.19	2.42839e-192	8.3968e-192
FBgn0000018	0.161651	3.36041	5.77909	0.0162179	0.0172834
FBgn0000024	-2.1843	6.48124	907.963	1.82314e-199	6.50374e-199
FBgn0000032	1.95561	5.67384	2534.24	0	0
FBgn0000037	-1.91376	4.24891	1216.41	1.6533e-266	7.8926e-266
FBgn0000038	-2.2528	6.86975	756.874	1.28447e-166	3.92986e-166
FBgn0000039	-2.25993	3.41219	914.11	8.40376e-201	3.01382e-200
FBgn0000044	-0.485639	9.55026	55.2266	1.07406e-13	1.31743e-13
FBgn0000045	-2.14389	9.63543	372.537	5.24545e-83	1.03822e-82
FBgn0000046	-1.99916	8.13578	1927.26	0	0
FBgn0000047	-1.29699	7.9598	66.9276	2.81669e-16	3.5286e-16
FBgn0000052	0.764439	7.16185	101.778	6.21166e-24	8.32418e-24
FBgn0000053	0.433909	7.10426	27.1032	1.92878e-07	2.21285e-07
FBgn0000054	1.51968	5.41032	1527.9	0	0
FBgn0000055	-1.52297	11.2557	225.81	4.88857e-51	7.9819e-51
FBgn0000056	-0.969032	0.390826	19.1338	1.21871e-05	1.36539e-05
FBgn0000057	-0.412002	5.68811	172.761	1.84544e-39	2.7689e-39
FBgn0000061	-0.672	-0.366735	10.4346	0.00123678	0.00134486
FBgn0000063	2.10294	5.03133	484.422	2.33149e-107	5.32325e-107
FBgn0000064	-1.52048	12.0129	1520.02	0	0
FBgn0000071	0.162269	0.275069	0.434524	0.509778	0.518439
FBgn0000075	0.24385	1.7725	2.10524	0.146795	0.152253
FBgn0000077	1.00626	3.87446	266.829	5.57321e-60	9.64778e-60
FBgn0000083	-0.249119	7.71765	51.7597	6.27269e-13	7.63853e-13
FBgn0000092	0.674625	3.98578	25.1131	5.40647e-07	6.16457e-07
FBgn0000097	0.967532	6.78805	651.645	9.80216e-144	2.68537e-143
FBgn0000099	-1.33131	5.3573	521.072	2.47376e-115	5.88834e-115
FBgn0000100	0.865828	10.2102	453.746	1.10399e-100	2.42858e-100
FBgn0000108	-2.10435	7.6282	1333.48	5.98953e-292	3.17327e-291
FBgn0000109	1.30921	4.09905	368.72	3.55495e-82	7.004e-82
FBgn0000114	0.638873	9.74914	385.843	6.65224e-86	1.33937e-85
FBgn0000115	0.542992	5.2545	182.396	1.45338e-41	2.21295e-41
FBgn0000116	-1.39751	10.8077	881.186	1.20714e-193	4.19395e-193
FBgn0000117	1.07781	8.63788	1326.03	2.48995e-290	1.31403e-289
FBgn0000119	-0.285165	5.52085	63.2418	1.82832e-15	2.27266e-15
FBgn0000120	-1.92488	9.88719	1956.75	0	0
FBgn0000121	-1.87063	10.4346	1628.46	0	0
FBgn0000139	0.700953	5.24327	285.77	4.15259e-64	7.37761e-64
FBgn0000140	3.41465	7.62825	3169.37	0	0
FBgn0000146	3.60802	5.45612	4728.17	0	0
FBgn0000147	1.29341	5.69273	652.289	7.10136e-144	1.94829e-143
FBgn0000150	0.98019	9.43295	406.322	2.31611e-90	4.78765e-90
FBgn0000152	0.741188	4.68674	260.407	1.3987e-58	2.39759e-58
FBgn0000153	-1.77088	6.73676	1067.83	3.23888e-234	1.35173e-233
FBgn0000157	-1.87899	3.55	1009.79	1.33649e-221	5.25976e-221
FBgn0000163	0.21702	7.12791	33.2138	8.25645e-09	9.62303e-09
FBgn0000173	0.668372	6.74085	470.158	2.96065e-104	6.64898e-104
FBgn0000179	-1.68756	1.93648	312.206	7.22204e-70	1.32851e-69
FBgn0000180	-0.387078	2.19982	15.322	9.0655e-05	0.000100366
FBgn0000181	1.41936	8.62253	1673.17	0	0
FBgn0000182	3.45779	9.9516	5456.34	0	0
FBgn0000183	1.17059	7.81711	1558.35	0	0
FBgn0000206	-2.00157	4.94385	1508.14	0	0
FBgn0000210	0.792721	4.07984	70.7519	4.05087e-17	5.11675e-17
FBgn0000212	1.88892	7.50066	1279.86	2.69556e-280	1.3574e-279
FBgn0000221	1.29752	3.11659	327.861	2.80924e-73	5.25351e-73
FBgn0000228	1.02004	6.22439	876.675	1.15491e-192	4.0022e-192
FBgn0000229	-0.680855	5.731	335.538	5.97779e-75	1.12793e-74
FBgn0000233	-0.615409	0.321915	12.8891	0.000330506	0.000362892
FBgn0000239	1.39304	7.7966	1754.74	0	0
FBgn0000241	-1.6151	3.20493	436.782	5.43045e-97	1.16983e-96
FBgn0000242	1.07057	5.47738	603.379	3.08265e-133	8.03323e-133
FBgn0000244	-1.60635	6.67859	1250.89	5.32838e-274	2.62178e-273
FBgn0000246	-0.193824	3.45915	2.39026	0.122094	0.126939
FBgn0000247	0.332567	7.10525	77.5936	1.26577e-18	1.62157e-18
FBgn0000250	1.51481	8.36773	2257.58	0	0
FBgn0000251	2.31422	7.25321	3668.57	0	0
FBgn0000253	-0.191147	10.0489	17.835	2.4091e-05	2.68983e-05
FBgn0000256	-1.87108	7.80142	2483.89	0	0
FBgn0000257	1.07563	4.98628	397.657	1.78219e-88	3.64888e-88
FBgn0000259	0.686859	7.62809	306.734	1.12373e-68	2.0488e-68
FBgn0000261	-1.9144	9.64688	1537.3	0	0
FBgn0000273	-0.055404	5.46364	0.885458	0.346711	0.355046
FBgn0000283	2.18681	7.33228	2775.47	0	0
FBgn0000286	0.0741805	6.92719	4.48871	0.0341195	0.0360644
FBgn0000287	-3.30314	4.72417	2343.36	0	0
FBgn0000289	1.24913	7.64081	1840.45	0	0
FBgn0000299	0.0542033	8.53194	0.735703	0.391041	0.399662
FBgn0000303	-2.06061	4.99415	1625.62	0	0
FBgn0000307	2.32809	7.24114	1584.46	0	0
FBgn0000308	0.344686	9.22308	81.6448	1.62882e-19	2.09918e-19
FBgn0000313	-2.12224	8.50636	1897.33	0	0
FBgn0000316	1.81025	5.06397	2145.85	0	0
FBgn0000317	0.655752	6.112	223.661	1.43824e-50	2.33943e-50
FBgn0000318	-0.0351772	6.61752	0.95304	0.328947	0.33711
FBgn0000319	0.446868	9.36991	300.567	2.47928e-67	4.48995e-67
FBgn0000320	-0.304248	4.4564	39.9562	2.59728e-10	3.08148e-10
FBgn0000326	0.0375069	5.20283	0.331069	0.56503	0.573336
FBgn0000330	1.01967	4.97657	664.864	1.30787e-146	3.64315e-146
FBgn0000337	-1.61251	0.753733	93.2409	4.63007e-22	6.11374e-22
FBgn0000339	0.290274	5.89184	63.3328	1.74575e-15	2.17088e-15
FBgn0000346	-1.13795	6.85661	259.507	2.19828e-58	3.76274e-58
FBgn0000352	2.62355	6.15461	3630.23	0	0
FBgn0000370	-0.794811	10.0835	504.284	1.11125e-111	2.59227e-111
FBgn0000376	3.24845	6.62386	4632.62	0	0
FBgn0000377	1.32025	5.46353	1241.28	6.51384e-272	3.18025e-271
FBgn0000382	0.323697	7.34734	87.6004	8.01086e-21	1.04495e-20
FBgn0000384	1.71418	4.03477	1023.32	1.53592e-224	6.13395e-224
FBgn0000392	0.592919	9.06923	287.02	2.21798e-64	3.9487e-64
FBgn0000394	-0.748644	5.40302	313.946	3.01764e-70	5.5651e-70
FBgn0000395	-1.3081	4.33332	166.63	4.02951e-38	5.99828e-38
FBgn0000404	4.77636	9.5098	9948.71	0	0
FBgn0000406	-1.18018	9.01229	258.149	4.34598e-58	7.42681e-58
FBgn0000409	-1.2519	9.89406	565.603	5.07927e-125	1.26741e-124
FBgn0000411	-1.42144	2.67001	319.592	1.77705e-71	3.30167e-71
FBgn0000412	1.61117	9.03737	2761.2	0	0
FBgn0000413	1.43134	6.77044	1210.63	2.98892e-265	1.41756e-264
FBgn0000414	0.83035	7.28824	391.42	4.0623e-87	8.24226e-87
FBgn0000416	-0.398612	10.0027	143.665	4.20671e-33	6.0451e-33
FBgn0000422	-1.61538	6.08064	639.545	4.19556e-141	1.13461e-140
FBgn0000426	1.64923	4.5381	863.528	8.32989e-190	2.8511e-189
FBgn0000439	-1.68762	1.65855	187.891	9.17694e-43	1.41093e-42
FBgn0000442	-1.42238	4.01349	650.454	1.77983e-143	4.87173e-143
FBgn0000447	-0.621357	6.57162	279.292	1.0711e-62	1.88875e-62
FBgn0000448	-0.763657	4.68043	90.8687	1.53527e-21	2.01709e-21
FBgn0000451	-1.03468	3.24172	29.7828	4.83259e-08	5.58906e-08
FBgn0000454	1.47284	7.93971	1684.95	0	0
FBgn0000455	-0.184974	5.76877	23.9666	9.80204e-07	1.11376e-06
FBgn0000459	-1.44181	2.29076	236.385	2.41564e-53	4.00083e-53
FBgn0000463	3.00868	5.75281	765.828	1.4518e-168	4.48683e-168
FBgn0000464	0.0456421	6.88697	1.00998	0.314908	0.323038
FBgn0000473	-2.61769	7.76188	425.171	1.82791e-94	3.87765e-94
FBgn0000477	-1.33074	5.05095	371.285	9.82664e-83	1.9409e-82
FBgn0000479	-0.540844	8.09872	144.083	3.4071e-33	4.89904e-33
FBgn0000482	1.08354	4.98117	778.265	2.86826e-171	8.97291e-171
FBgn0000489	-1.79483	6.65164	1688.9	0	0
FBgn0000490	-1.15071	4.67226	359.343	3.91489e-80	7.6054e-80
FBgn0000492	-1.17777	3.24376	160.279	9.83365e-37	1.45285e-36
FBgn0000497	-1.96262	3.57754	436.286	6.96152e-97	1.49864e-96
FBgn0000499	0.743939	6.53599	443.007	2.39878e-98	5.2222e-98
FBgn0000500	-2.10877	2.31904	431.957	6.09406e-96	1.30329e-95
FBgn0000504	-1.95459	6.42844	1011.66	5.24556e-222	2.06869e-221
FBgn0000524	2.67625	5.5611	2280.22	0	0
FBgn0000527	-1.95424	5.12591	1381.62	2.07142e-302	1.13562e-301
FBgn0000533	1.23088	4.85746	613.955	1.54347e-135	4.07272e-135
FBgn0000535	-2.06025	3.12237	380.564	9.38035e-85	1.87587e-84
FBgn0000536	-0.384455	7.11626	108.338	2.26688e-25	3.06913e-25
FBgn0000541	1.72422	8.97226	796.919	2.52246e-175	8.07001e-175
FBgn0000542	-0.168974	3.74147	5.24852	0.0219654	0.0233218
FBgn0000543	0.896826	5.29204	457.549	1.64159e-101	3.63402e-101
FBgn0000546	1.37369	6.11476	792.851	1.9333e-174	6.15803e-174
FBgn0000556	1.30574	12.3884	1666.32	0	0
FBgn0000557	-2.0327	8.47362	1976	0	0
FBgn0000559	0.902167	12.0803	1328.28	8.10429e-291	4.28648e-290
FBgn0000562	0.671053	7.70202	441.327	5.56792e-98	1.20909e-97
FBgn0000565	-1.31553	6.37575	100.821	1.00683e-23	1.34752e-23
FBgn0000566	1.27884	6.22422	440.226	9.66867e-98	2.09429e-97
FBgn0000567	-0.534686	4.76527	58.3181	2.2298e-14	2.75147e-14
FBgn0000568	-0.115475	7.11146	7.86166	0.0050494	0.00543442
FBgn0000575	0.0810578	5.01094	3.99955	0.0455123	0.0479512
FBgn0000576	-2.76277	2.5695	1028.69	1.04506e-225	4.20024e-225
FBgn0000577	-2.4667	1.44007	415.791	2.01187e-92	4.20936e-92
FBgn0000578	1.47433	6.60103	1135.13	7.65705e-249	3.40445e-248
FBgn0000579	-0.450003	10.1434	83.742	5.63755e-20	7.30033e-20
FBgn0000581	1.89767	8.11606	1725.92	0	0
FBgn0000588	2.55254	4.89062	2011.88	0	0
FBgn0000592	-3.21226	10.4927	2590.2	0	0
FBgn0000594	-2.40268	1.43998	137.293	1.0405e-31	1.47903e-31
FBgn0000611	0.697854	7.4242	409.317	5.16237e-91	1.07157e-90
FBgn0000615	-1.91991	10.0698	2127.91	0	0
FBgn0000617	1.50299	4.3516	901.269	5.19869e-198	1.84273e-197
FBgn0000618	1.59861	3.5362	514.835	5.62652e-114	1.32826e-113
FBgn0000625	-1.30638	1.70629	165.508	7.0848e-38	1.05314e-37
FBgn0000629	1.77058	5.82791	1487.39	0	0
FBgn0000633	-1.32812	2.861	240.091	3.75783e-54	6.26218e-54
FBgn0000635	-1.07073	6.82446	724.275	1.57388e-159	4.65858e-159
FBgn0000636	-0.84845	5.93846	417.647	7.93575e-93	1.66478e-92
FBgn0000658	-1.03423	2.19783	74.2619	6.84124e-18	8.69474e-18
FBgn0000659	-1.60369	5.66833	795.893	4.21599e-175	1.34789e-174
FBgn0000662	0.93053	6.62881	1236.66	6.58322e-271	3.19926e-270
FBgn0000667	-1.07321	8.89549	476.229	1.4132e-105	3.19805e-105
FBgn0000709	1.74764	6.21644	2373.61	0	0
FBgn0000711	-0.132409	7.2028	15.2007	9.66652e-05	0.000106995
FBgn0000715	-2.12198	2.87194	646.799	1.10961e-142	3.02408e-142
FBgn0000719	1.16047	5.43857	939.731	2.26464e-206	8.35609e-206
FBgn0000721	0.943828	8.52682	610.205	1.00956e-134	2.65353e-134
FBgn0000723	-1.86755	6.47128	1736.54	0	0
FBgn0000810	2.01638	5.99792	3664.53	0	0
FBgn0000826	5.77292	5.13648	5054.92	0	0
FBgn0000927	6.86083	6.99598	6934.28	0	0
FBgn0000964	4.02593	5.01112	1272.19	1.2519e-278	6.25422e-278
FBgn0001078	1.75618	7.44756	1295.83	9.09877e-284	4.6638e-283
FBgn0001079	2.52792	5.05778	2125.73	0	0
FBgn0001083	-1.89417	3.24647	544.961	1.57114e-120	3.82848e-120
FBgn0001084	1.01283	2.76315	152.177	5.79674e-35	8.4416e-35
FBgn0001085	4.12022	6.16077	4438.03	0	0
FBgn0001086	2.76323	6.46122	2307.81	0	0
FBgn0001087	1.40343	6.82511	1429.31	8.97205796282708e-313	5.0868556447529e-312
FBgn0001089	-2.18953	6.38725	937.522	6.84182e-206	2.51959e-205
FBgn0001091	-1.55785	10.9327	444.84	9.57354e-99	2.08707e-98
FBgn0001092	0.74922	9.42743	326.357	5.974e-73	1.11564e-72
FBgn0001098	-0.337855	9.09611	64.0065	1.2401e-15	1.54494e-15
FBgn0001099	-2.67365	6.21173	2173.22	0	0
FBgn0001104	1.66922	6.71186	1772.59	0	0
FBgn0001105	1.0108	6.46952	734.784	8.1643e-162	2.44026e-161
FBgn0001108	0.96089	7.2718	1126.44	5.91407e-247	2.60986e-246
FBgn0001112	-6.07869	7.80234	4788.71	0	0
FBgn0001114	-1.03567	7.27833	266.692	5.96937e-60	1.0326e-59
FBgn0001122	0.0973832	6.00479	3.82664	0.0504439	0.053082
FBgn0001123	-1.00457	5.90782	664.924	1.26934e-146	3.53687e-146
FBgn0001124	-0.921388	7.66593	418.364	5.53982e-93	1.16371e-92
FBgn0001125	0.458132	7.90263	45.1019	1.87047e-11	2.24338e-11
FBgn0001128	-1.54761	9.38626	696.612	1.63105e-153	4.70412e-153
FBgn0001133	0.970298	5.0513	471.938	1.21382e-104	2.73247e-104
FBgn0001134	-1.87534	0.520533	173.661	1.17407e-39	1.76325e-39
FBgn0001137	0.258625	5.1205	32.7303	1.05875e-08	1.23338e-08
FBgn0001138	-0.832728	0.851274	42.4332	7.31383e-11	8.72659e-11
FBgn0001139	1.56923	7.69416	1709.39	0	0
FBgn0001142	1.26427	7.14735	517.775	1.29004e-114	3.0538e-114
FBgn0001145	-1.80774	9.7809	1899.43	0	0
FBgn0001149	0.435506	8.30447	55.0146	1.19636e-13	1.46668e-13
FBgn0001150	-0.648857	3.40867	64.4711	9.79575e-16	1.22182e-15
FBgn0001168	-1.25156	6.71961	442.928	2.4957e-98	5.4307e-98
FBgn0001169	2.47525	6.98388	2653.73	0	0
FBgn0001170	-1.96074	0.0906175	87.7212	7.53628e-21	9.83314e-21
FBgn0001179	1.58126	5.14056	1382.41	1.39745e-302	7.6657e-302
FBgn0001180	3.51418	5.18238	3053.56	0	0
FBgn0001185	1.30288	4.85768	977.393	1.4729e-214	5.63935e-214
FBgn0001186	-0.544861	8.72009	345.258	4.56903e-77	8.73444e-77
FBgn0001187	-1.65219	6.92357	627.026	2.21624e-138	5.9357e-138
FBgn0001189	-0.413445	5.94885	188.177	7.94888e-43	1.22252e-42
FBgn0001197	2.88748	7.82394	5505.45	0	0
FBgn0001202	-0.251142	5.46072	63.0613	2.00372e-15	2.48939e-15
FBgn0001208	-1.81828	7.81128	670.681	7.10246e-148	1.99489e-147
FBgn0001215	0.949523	8.67751	757.106	1.14385e-166	3.50191e-166
FBgn0001216	-2.39855	7.59519	2476.41	0	0
FBgn0001217	-6.21867	7.19478	8198.06	0	0
FBgn0001218	0.763031	9.83251	314.475	2.31422e-70	4.27369e-70
FBgn0001219	1.38892	11.5551	2295.81	0	0
FBgn0001220	-0.148421	8.90813	33.8043	6.09435e-09	7.11798e-09
FBgn0001222	1.23465	6.73056	1161.25	1.6135e-254	7.34661e-254
FBgn0001223	-1.17363	5.60851	13.9959	0.000183208	0.000201887
FBgn0001224	-1.93835	4.21311	551.323	6.48836e-122	1.59627e-121
FBgn0001225	2.77416	8.65305	1159.65	3.5776e-254	1.62738e-253
FBgn0001226	3.89487	7.93719	3551.51	0	0
FBgn0001227	-1.79896	2.61008	456.259	3.13307e-101	6.92115e-101
FBgn0001229	-1.52147	1.0923	172.723	1.88088e-39	2.82162e-39
FBgn0001233	2.25859	10.7671	3702.03	0	0
FBgn0001235	-1.52184	6.39603	336.422	3.83718e-75	7.25184e-75
FBgn0001247	-0.30682	6.84894	104.875	1.30061e-24	1.75386e-24
FBgn0001248	0.157703	8.87448	17.4216	2.99411e-05	3.33868e-05
FBgn0001250	-1.42742	7.01178	921.971	1.64302e-202	5.96469e-202
FBgn0001253	-2.48911	2.50161	180.073	4.67089e-41	7.08008e-41
FBgn0001257	-0.180349	5.1757	7.34511	0.00672456	0.0072184
FBgn0001258	-1.65494	5.51824	692.191	1.49204e-152	4.28492e-152
FBgn0001259	-1.9359	1.08344	243.099	8.29743e-55	1.38883e-54
FBgn0001263	-1.83919	6.34796	1409.19	0	1.1813e-307
FBgn0001269	-2.55366	1.67297	520.556	3.20301e-115	7.61652e-115
FBgn0001276	1.52094	3.22788	455.402	4.8134e-101	1.06133e-100
FBgn0001280	-0.225998	5.36331	30.058	4.19315e-08	4.85428e-08
FBgn0001281	-5.03615	7.33051	1685.95	0	0
FBgn0001285	1.24033	5.3565	44.9538	2.01736e-11	2.41802e-11
FBgn0001291	0.667088	5.63986	234.422	6.47248e-53	1.06843e-52
FBgn0001296	0.749648	6.11472	299.759	3.71705e-67	6.72768e-67
FBgn0001297	-1.53982	8.64663	1272.9	8.75894e-279	4.37808e-278
FBgn0001301	0.268849	6.66822	34.6551	3.93605e-09	4.60911e-09
FBgn0001308	1.20129	7.83269	1832.42	0	0
FBgn0001311	-1.08306	2.22094	81.044	2.20752e-19	2.84151e-19
FBgn0001316	1.23925	8.1931	1433.44	1.13979681609438e-313	6.47779957320585e-313
FBgn0001319	-1.69374	1.08268	134.272	4.7632e-31	6.73932e-31
FBgn0001320	-1.60059	3.14949	633.684	7.8983e-140	2.12683e-139
FBgn0001321	-1.37247	1.4359	101.213	8.26151e-24	1.10602e-23
FBgn0001323	-1.47344	3.48739	431.96	6.08439e-96	1.30152e-95
FBgn0001324	0.130225	6.75247	11.4415	0.000718212	0.000784855
FBgn0001330	2.82367	4.87068	2796.65	0	0
FBgn0001332	1.8182	6.65503	2393.07	0	0
FBgn0001337	1.97034	6.70304	3698.93	0	0
FBgn0001341	2.70959	6.08064	5215.02	0	0
FBgn0001404	0.065833	7.54815	3.67334	0.0552891	0.0581289
FBgn0001491	0.694615	5.25299	163.233	2.22469e-37	3.29764e-37
FBgn0001565	0.759932	6.67026	401.051	3.25231e-89	6.67616e-89
FBgn0001624	-0.253274	7.40112	33.4761	7.21454e-09	8.41696e-09
FBgn0001941	0.639541	6.17828	249.088	4.10433e-56	6.92376e-56
FBgn0001942	0.372714	10.6796	156.441	6.78195e-36	9.95605e-36
FBgn0001961	0.044439	6.9394	1.98775	0.158576	0.164238
FBgn0001965	0.839089	6.41665	727.789	2.70986e-160	8.05377e-160
FBgn0001970	0.749195	4.74191	193.822	4.65641e-44	7.22607e-44
FBgn0001974	1.26182	4.95881	665.218	1.09549e-146	3.05426e-146
FBgn0001977	0.119905	5.59105	7.70365	0.00551094	0.00592508
FBgn0001978	2.22116	7.71465	3940.71	0	0
FBgn0001981	-1.19733	2.24691	165.409	7.44803e-38	1.10679e-37
FBgn0001990	2.29189	4.9476	2321.92	0	0
FBgn0001991	-2.0189	6.80663	1104.05	4.34427e-242	1.87597e-241
FBgn0001994	1.35672	7.13678	1539.79	0	0
FBgn0001995	0.694822	4.94829	150.603	1.28e-34	1.86087e-34
FBgn0002021	-0.0941937	5.22395	6.60495	0.0101696	0.0108757
FBgn0002022	0.167567	6.27709	31.0959	2.45595e-08	2.85016e-08
FBgn0002023	-2.20167	3.67442	1122.25	4.81632e-246	2.11555e-245
FBgn0002031	0.665418	7.31579	359.849	3.03767e-80	5.90974e-80
FBgn0002036	-2.87925	6.90972	5939.22	0	0
FBgn0002044	1.1752	7.3755	1201.62	2.7173e-263	1.27848e-262
FBgn0002069	1.52656	7.3623	2677.78	0	0
FBgn0002121	1.09867	7.81948	437.207	4.38776e-97	9.45433e-97
FBgn0002174	-0.593109	6.65474	251.5	1.22281e-56	2.06946e-56
FBgn0002183	2.48017	7.60629	5461.66	0	0
FBgn0002283	1.38964	5.91496	1234.33	2.11441e-270	1.02438e-269
FBgn0002284	0.377205	6.88472	88.0307	6.44476e-21	8.41592e-21
FBgn0002306	-1.54359	5.39316	851.322	3.75062e-187	1.26677e-186
FBgn0002354	-0.498433	3.88913	87.4729	8.54404e-21	1.11404e-20
FBgn0002413	2.47789	7.12902	2724.45	0	0
FBgn0002431	0.439478	8.77851	86.9572	1.10894e-20	1.44413e-20
FBgn0002441	1.19985	6.69526	1134.62	9.86894e-249	4.38377e-248
FBgn0002466	2.38029	5.91568	1963.59	0	0
FBgn0002521	1.15583	6.95845	570.485	4.40347e-126	1.10343e-125
FBgn0002522	-0.846917	2.33406	80.1288	3.50779e-19	4.50845e-19
FBgn0002524	1.40743	6.60319	1763.72	0	0
FBgn0002525	2.19452	7.28701	4333.71	0	0
FBgn0002526	0.629723	7.17466	87.0683	1.0484e-20	1.36604e-20
FBgn0002528	0.239154	6.05087	19.2972	1.11867e-05	1.25421e-05
FBgn0002542	2.46442	7.41979	3627.38	0	0
FBgn0002543	-0.781547	4.37545	49.033	2.5169e-12	3.04456e-12
FBgn0002552	2.27984	5.68667	2264.67	0	0
FBgn0002564	-1.1849	0.574235	35.9765	1.99714e-09	2.34825e-09
FBgn0002565	-4.18346	8.09013	70.5612	4.46216e-17	5.6325e-17
FBgn0002567	0.479031	7.57806	154.877	1.48942e-35	2.18176e-35
FBgn0002569	-2.13482	5.54211	408.748	6.86662e-91	1.42314e-90
FBgn0002570	-3.02945	10.4488	636.812	1.64923e-140	4.45112e-140
FBgn0002571	-1.62263	6.31799	349.529	5.36604e-78	1.02976e-77
FBgn0002573	-2.72391	1.26747	324.026	1.92256e-72	3.58189e-72
FBgn0002576	-0.891075	0.681909	35.0749	3.17271e-09	3.72031e-09
FBgn0002577	-0.408342	1.46141	14.5757	0.00013464	0.000148732
FBgn0002578	0.195717	4.71729	9.77429	0.00176969	0.00191904
FBgn0002579	0.727054	9.35231	197.48	7.41009e-45	1.15715e-44
FBgn0002590	0.120174	9.47314	13.307	0.000264423	0.000290705
FBgn0002592	0.0138296	0.238388	0.00818201	0.927926	0.929893
FBgn0002593	0.81336	10.0924	278.536	1.56563e-62	2.75926e-62
FBgn0002607	0.93148	10.7819	763.419	4.84949e-168	1.49532e-167
FBgn0002609	0.656622	2.06142	46.6277	8.58368e-12	1.03264e-11
FBgn0002622	0.978576	10.2068	630.738	3.45375e-139	9.28164e-139
FBgn0002626	0.975809	9.8976	801.248	2.88931e-176	9.30345e-176
FBgn0002638	2.62603	7.55576	3032.86	0	0
FBgn0002641	0.939715	4.96266	264.77	1.56568e-59	2.69948e-59
FBgn0002643	0.525749	6.70493	149.269	2.50428e-34	3.63291e-34
FBgn0002645	0.822957	8.01053	313.503	3.76874e-70	6.94757e-70
FBgn0002652	2.12746	4.30504	950.905	8.43526e-209	3.14808e-208
FBgn0002673	1.66574	6.22833	1096.98	1.49593e-240	6.41589e-240
FBgn0002707	2.57303	4.37338	1985.81	0	0
FBgn0002709	-1.44067	6.75428	736.625	3.24745e-162	9.71258e-162
FBgn0002715	-1.59013	5.75326	825.358	1.65536e-181	5.45083e-181
FBgn0002716	0.0378045	0.824745	0.0626899	0.802294	0.806816
FBgn0002719	-0.980326	8.98781	408.571	7.50114e-91	1.5543e-90
FBgn0002723	0.0938335	5.19003	5.03832	0.0247926	0.0262969
FBgn0002733	0.322218	2.08906	10.5759	0.00114572	0.00124756
FBgn0002736	1.41535	5.19665	941.305	1.03015e-206	3.80999e-206
FBgn0002772	-1.45573	9.15185	301.45	1.59133e-67	2.8852e-67
FBgn0002773	-1.45004	9.75211	225.998	4.44716e-51	7.2637e-51
FBgn0002774	0.156023	6.09407	13.9834	0.000184435	0.000203216
FBgn0002775	1.73651	4.55278	1383.01	1.03181e-302	5.66327e-302
FBgn0002778	2.05209	6.23645	2584.57	0	0
FBgn0002780	3.23963	8.40013	5705.37	0	0
FBgn0002781	2.29251	8.27902	2971.33	0	0
FBgn0002783	2.66611	7.54818	4924.06	0	0
FBgn0002787	0.760405	7.21274	472.265	1.03007e-104	2.31937e-104
FBgn0002789	-0.923118	8.02513	550.001	1.25799e-121	3.08849e-121
FBgn0002791	1.26407	5.10857	961.325	4.58148e-211	1.72755e-210
FBgn0002868	-1.20689	9.4483	197.132	8.82295e-45	1.3771e-44
FBgn0002869	-1.23819	3.22479	25.7823	3.82181e-07	4.36824e-07
FBgn0002872	1.85127	6.3407	2509.35	0	0
FBgn0002878	3.4275	5.80092	3583.58	0	0
FBgn0002887	2.10045	5.62368	1947.21	0	0
FBgn0002891	1.88545	5.25018	992.488	7.70997e-218	2.98947e-217
FBgn0002899	4.56469	4.797	2482.74	0	0
FBgn0002901	2.466	4.35789	1468.95	2.18871081107672e-321	1.27913595708299e-320
FBgn0002909	1.19371	5.37755	574.521	5.83243e-127	1.47047e-126
FBgn0002914	1.15323	7.34707	1358.94	1.76156e-297	9.50318e-297
FBgn0002917	-1.91395	4.72407	1279.48	3.25412e-280	1.6378e-279
FBgn0002921	-0.794081	11.2361	498.782	1.74997e-110	4.06023e-110
FBgn0002922	-2.74691	1.9866	569.643	6.71482e-126	1.67995e-125
FBgn0002924	2.1496	6.01592	1477.35	3.45845952088873e-323	2.02566914794911e-322
FBgn0002926	4.18663	4.80668	485.569	1.31223e-107	3.00334e-107
FBgn0002930	-1.68217	6.92263	1145.35	4.60823e-251	2.07031e-250
FBgn0002931	-1.50963	3.06487	333.83	1.40778e-74	2.6526e-74
FBgn0002932	0.823727	5.95978	367.118	7.93886e-82	1.56119e-81
FBgn0002936	-1.85659	3.05696	236.045	2.86473e-53	4.74378e-53
FBgn0002937	-2.14882	4.07035	684.028	8.88996e-151	2.53001e-150
FBgn0002938	-2.00041	9.03263	1354.82	1.38246e-296	7.44951e-296
FBgn0002939	-2.70349	5.68257	214.929	1.15475e-48	1.85439e-48
FBgn0002940	-1.84168	12.0538	1487.56	0	0
FBgn0002941	-1.95169	0.984741	201.176	1.15644e-45	1.81729e-45
FBgn0002945	-1.40153	4.46626	273.641	1.82519e-61	3.18877e-61
FBgn0002948	2.86417	5.42788	1469.97	1.31421461793772e-321	7.69260210574821e-321
FBgn0002962	6.50952	6.63399	1734.29	0	0
FBgn0002973	0.0270085	6.91831	0.75057	0.386296	0.394898
FBgn0002985	-0.978606	3.98313	186.096	2.2624e-42	3.46543e-42
FBgn0002989	2.53618	4.74538	1842.78	0	0
FBgn0003002	-0.723858	1.09682	36.0423	1.93079e-09	2.27107e-09
FBgn0003008	0.580382	4.02915	137.221	1.07894e-31	1.53345e-31
FBgn0003011	-2.0287	1.639	251.028	1.55036e-56	2.62239e-56
FBgn0003016	0.480049	6.94073	224.463	9.61224e-51	1.5654e-50
FBgn0003022	3.13602	6.32279	3870.3	0	0
FBgn0003023	4.13338	7.10494	5427.61	0	0
FBgn0003028	4.85068	7.84181	7585.71	0	0
FBgn0003041	2.68355	6.67467	4240.11	0	0
FBgn0003042	1.14143	4.3507	480.083	2.05006e-106	4.66156e-106
FBgn0003044	2.56439	7.10407	4009.17	0	0
FBgn0003048	1.51312	6.73853	1004.19	2.20257e-220	8.61086e-220
FBgn0003053	-0.282999	6.07958	26.936	2.10305e-07	2.41191e-07
FBgn0003062	2.66041	6.10121	2711.41	0	0
FBgn0003067	-1.75787	9.08591	107.782	3.0008e-25	4.05872e-25
FBgn0003068	-1.61625	6.0795	624.836	6.63629e-138	1.77186e-137
FBgn0003071	-1.89725	8.81	1961.52	0	0
FBgn0003074	-0.910347	9.4219	687.351	1.68385e-151	4.80521e-151
FBgn0003076	-0.420886	8.50161	75.6941	3.31195e-18	4.22061e-18
FBgn0003079	1.92976	5.83621	2439.17	0	0
FBgn0003082	2.67285	4.04763	1470.26	1.13141032897645e-321	6.62542031073112e-321
FBgn0003087	2.70798	5.54866	1048.41	5.39789e-230	2.21754e-229
FBgn0003089	1.92465	1.22167	114.133	1.21869e-26	1.66813e-26
FBgn0003090	-1.2754	3.42901	311.897	8.43501e-70	1.55044e-69
FBgn0003091	-1.27521	5.62369	668.63	1.98436e-147	5.55538e-147
FBgn0003093	-0.243482	7.01485	44.8025	2.17946e-11	2.61133e-11
FBgn0003116	0.333002	4.54869	56.3563	6.04587e-14	7.43315e-14
FBgn0003117	-0.915001	1.92439	102.101	5.27492e-24	7.07889e-24
FBgn0003118	-0.0809894	4.35767	2.5727	0.108722	0.113249
FBgn0003124	2.93044	7.89617	5663.23	0	0
FBgn0003129	-1.91335	1.8028	286.529	2.83713e-64	5.04527e-64
FBgn0003134	-0.507033	7.26932	187.432	1.15587e-42	1.77539e-42
FBgn0003138	1.67856	7.6413	3288.85	0	0
FBgn0003139	1.50538	5.91978	1832.08	0	0
FBgn0003141	0.441722	5.45059	119.798	7.00498e-28	9.66955e-28
FBgn0003149	-1.66449	9.7932	961.141	5.02225e-211	1.89074e-210
FBgn0003159	-1.41521	7.83601	1108.08	5.80175e-243	2.51108e-242
FBgn0003162	-1.66156	6.14021	950.625	9.70478e-209	3.61901e-208
FBgn0003169	0.295667	6.38631	72.8025	1.43293e-17	1.817e-17
FBgn0003174	-1.36748	1.28292	119.101	9.95244e-28	1.37162e-27
FBgn0003175	0.618721	6.96812	206.091	9.78776e-47	1.55151e-46
FBgn0003178	-0.402759	10.3043	77.1355	1.59622e-18	2.04297e-18
FBgn0003189	1.33309	6.54267	806.241	2.37184e-177	7.67117e-177
FBgn0003204	1.74082	7.42954	3011.56	0	0
FBgn0003205	1.68538	6.9329	2672.18	0	0
FBgn0003206	0.342997	5.93882	89.6582	2.83071e-21	3.70777e-21
FBgn0003209	0.303256	6.87242	63.2172	1.85126e-15	2.30057e-15
FBgn0003210	1.64029	6.74093	2245.22	0	0
FBgn0003218	-0.445145	7.61993	206.741	7.06032e-47	1.12011e-46
FBgn0003227	2.98872	3.26133	1233.35	3.44327e-270	1.66733e-269
FBgn0003231	-0.0930656	9.14808	9.8877	0.00166388	0.0018045
FBgn0003248	-1.79265	4.70543	890.995	8.89905e-196	3.1216e-195
FBgn0003249	-1.71515	6.62244	1309.7	8.80004e-287	4.56761e-286
FBgn0003250	-2.04471	6.97581	1320.99	3.10748e-289	1.63354e-288
FBgn0003254	-3.07621	3.01134	1341.42	1.12486e-293	5.98638e-293
FBgn0003255	-1.2285	1.36275	111.589	4.39519e-26	5.99442e-26
FBgn0003257	2.76493	5.64743	2301.34	0	0
FBgn0003261	0.995585	10.0511	1284.25	2.99199e-281	1.51393e-280
FBgn0003268	2.20635	6.25927	1804.79	0	0
FBgn0003274	1.07299	9.00913	511.185	3.50231e-113	8.22685e-113
FBgn0003275	-0.117456	5.2809	5.85465	0.015536	0.0165641
FBgn0003277	1.85637	7.68621	1885.32	0	0
FBgn0003278	2.84128	5.28737	2868.46	0	0
FBgn0003279	1.14854	10.8062	960.847	5.82033e-211	2.18945e-210
FBgn0003285	-0.100348	2.86612	1.14768	0.284035	0.291653
FBgn0003292	3.82138	4.4219	3950.97	0	0
FBgn0003295	-1.8606	0.995534	198.366	4.74779e-45	7.42759e-45
FBgn0003301	-0.908942	6.93212	474.95	2.68314e-105	6.06029e-105
FBgn0003302	-2.11686	4.64995	1083.58	1.22661e-237	5.19714e-237
FBgn0003308	-1.1873	5.10931	281.096	4.33265e-63	7.65437e-63
FBgn0003310	1.49513	6.41165	1985.68	0	0
FBgn0003317	1.18322	5.85129	969.3	8.46177e-213	3.21894e-212
FBgn0003321	0.484552	6.81032	311.841	8.67178e-70	1.59365e-69
FBgn0003326	-3.94994	4.6615	1593.77	0	0
FBgn0003328	-0.324709	5.81941	46.4861	9.22713e-12	1.10948e-11
FBgn0003330	1.54507	4.78683	1113.6	3.65221e-244	1.588e-243
FBgn0003334	1.24533	6.84022	1116.46	8.72656e-245	3.81011e-244
FBgn0003339	-1.88076	2.63581	417.998	6.65658e-93	1.39736e-92
FBgn0003345	-0.314264	6.74461	75.2742	4.09681e-18	5.21728e-18
FBgn0003346	1.77173	6.29675	2552.32	0	0
FBgn0003353	-0.638714	3.83129	114.38	1.07599e-26	1.47366e-26
FBgn0003358	-0.83395	6.36015	44.7723	2.21333e-11	2.65123e-11
FBgn0003360	-0.425803	10.9739	68.8444	1.06549e-16	1.33834e-16
FBgn0003366	-2.1578	6.2366	1347.98	4.23378e-295	2.27494e-294
FBgn0003371	-0.51623	8.87837	201.466	9.99776e-46	1.57267e-45
FBgn0003380	-2.3178	6.19966	289.331	6.95538e-65	1.24225e-64
FBgn0003386	-2.01148	3.64952	617.409	2.73682e-136	7.256e-136
FBgn0003388	-0.477851	1.14544	9.19674	0.00242447	0.00262366
FBgn0003390	-1.6927	4.99682	807.822	1.07491e-177	3.48487e-177
FBgn0003391	0.67394	7.03353	380.281	1.08084e-84	2.16009e-84
FBgn0003392	-0.753954	8.33622	745.291	4.24032e-164	1.28117e-163
FBgn0003396	0.0396907	7.12303	0.378576	0.538367	0.547043
FBgn0003401	4.18074	5.06373	6053.07	0	0
FBgn0003410	1.74094	5.27996	1054.56	2.48051e-231	1.02348e-230
FBgn0003415	1.84177	7.77547	900.04	9.61836e-198	3.40422e-197
FBgn0003416	2.06393	5.8778	2363.75	0	0
FBgn0003423	-0.872008	8.13727	1402.29	6.6842e-307	3.71838e-306
FBgn0003429	-1.87091	7.45324	819.516	3.08262e-180	1.00873e-179
FBgn0003430	-1.30934	1.37465	109.695	1.14305e-25	1.55337e-25
FBgn0003435	-3.85685	9.20018	3023.54	0	0
FBgn0003444	1.95116	5.03681	1364.84	9.1668e-299	4.96224e-298
FBgn0003447	2.19727	6.88245	2372.5	0	0
FBgn0003449	1.30528	5.66545	1039.22	5.37063e-228	2.18264e-227
FBgn0003450	4.08417	2.23507	1079.98	7.4298e-237	3.13537e-236
FBgn0003459	1.59652	5.80647	1315.53	4.75938e-288	2.47986e-287
FBgn0003460	-1.73709	3.40486	597.191	6.83622e-132	1.77027e-131
FBgn0003462	-0.414086	9.12307	148.132	4.43862e-34	6.42522e-34
FBgn0003463	-1.84759	6.41568	1274	5.06093e-279	2.53368e-278
FBgn0003464	1.97689	7.77762	3021.97	0	0
FBgn0003475	-0.0906421	7.99185	9.34101	0.00224082	0.00242576
FBgn0003479	0.866831	4.06054	226.012	4.41767e-51	7.21801e-51
FBgn0003480	3.05538	3.28981	1256.17	3.78155e-275	1.8665e-274
FBgn0003483	3.67223	6.2778	4059.04	0	0
FBgn0003495	1.99413	6.17401	1932.54	0	0
FBgn0003499	-1.50451	4.06705	440.583	8.08107e-98	1.75121e-97
FBgn0003502	2.20358	6.93076	3013.34	0	0
FBgn0003507	-0.121693	6.04142	4.20776	0.0402394	0.0424715
FBgn0003510	0.814569	2.66152	101.41	7.47827e-24	1.00159e-23
FBgn0003511	1.68992	3.15401	479.502	2.74201e-106	6.22898e-106
FBgn0003512	1.31674	4.38381	683.554	1.12748e-150	3.20583e-150
FBgn0003513	-1.37735	1.89961	166.122	5.20133e-38	7.73777e-38
FBgn0003514	0.0775856	7.1297	8.63138	0.00330421	0.00356671
FBgn0003515	-1.7623	4.37165	819.799	2.67551e-180	8.76117e-180
FBgn0003517	1.1046	10.6147	794.013	1.08068e-174	3.44922e-174
FBgn0003520	1.39469	7.97716	1347.12	6.4931e-295	3.48695e-294
FBgn0003525	7.20702	7.20065	8578.9	0	0
FBgn0003527	1.06903	3.62399	407.519	1.27091e-90	2.63055e-90
FBgn0003545	2.41096	6.13831	2842.51	0	0
FBgn0003557	0.442707	7.51179	222.587	2.46712e-50	4.00748e-50
FBgn0003559	0.997857	5.41229	988.984	4.45368e-217	1.72264e-216
FBgn0003567	2.1949	6.64539	2411.59	0	0
FBgn0003575	1.04643	6.64658	761.035	1.59944e-167	4.9206e-167
FBgn0003598	3.01479	7.33225	3835.83	0	0
FBgn0003607	1.23064	6.99968	1373.34	1.30557e-300	7.09175e-300
FBgn0003612	1.7662	7.59058	2257.66	0	0
FBgn0003638	-0.333178	7.86689	140.956	1.64515e-32	2.35125e-32
FBgn0003651	-1.40692	6.05738	860.096	4.64136e-189	1.58231e-188
FBgn0003654	0.285056	4.60039	37.1955	1.0686e-09	1.25991e-09
FBgn0003655	7.75357	7.1168	7318.52	0	0
FBgn0003656	0.19934	7.83826	53.1091	3.1552e-13	3.85364e-13
FBgn0003660	-0.222395	7.04182	43.7601	3.71191e-11	4.43843e-11
FBgn0003676	2.51309	7.68008	5024.63	0	0
FBgn0003687	2.85172	5.05848	2824.55	0	0
FBgn0003701	2.35151	6.10352	818.88	4.23853e-180	1.38602e-179
FBgn0003710	-1.99213	2.35475	561.876	3.2854e-124	8.17632e-124
FBgn0003714	0.851904	4.32062	307.906	6.24306e-69	1.14066e-68
FBgn0003715	-0.836707	2.27679	63.8354	1.35261e-15	1.684e-15
FBgn0003716	0.326196	6.89266	98.9052	2.64889e-23	3.53272e-23
FBgn0003721	-0.00810392	9.59527	0.0412462	0.839064	0.842717
FBgn0003731	-0.66579	6.53669	397.04	2.42866e-88	4.96387e-88
FBgn0003732	3.36613	8.02445	8521.05	0	0
FBgn0003733	5.03785	5.89269	5481.25	0	0
FBgn0003741	0.685722	3.98953	179.188	7.28888e-41	1.10307e-40
FBgn0003742	0.369426	4.80827	73.9498	8.01309e-18	1.01786e-17
FBgn0003744	0.930883	6.68334	1258.4	1.24315e-275	6.14555e-275
FBgn0003748	-1.00484	9.23933	1035	4.43318e-227	1.79242e-226
FBgn0003861	-1.8863	8.79096	1116.64	7.96776e-245	3.48042e-244
FBgn0003862	0.357362	7.33852	24.2263	8.56553e-07	9.74077e-07
FBgn0003863	-0.795547	11.2935	200.294	1.80211e-45	2.8277e-45
FBgn0003866	-1.13111	4.04498	457.081	2.07506e-101	4.58823e-101
FBgn0003867	-1.55074	5.1734	360.801	1.88422e-80	3.66949e-80
FBgn0003870	0.859566	7.11087	710.334	1.6927e-156	4.9514e-156
FBgn0003882	1.20946	5.70821	797.751	1.66327e-175	5.33023e-175
FBgn0003884	0.0348664	10.3395	1.46763	0.22572	0.232708
FBgn0003885	-1.6615	8.47567	1589.07	0	0
FBgn0003886	-2.37605	4.27559	840.76	7.41861e-185	2.4782e-184
FBgn0003887	1.82392	9.92369	1829.88	0	0
FBgn0003888	-0.41831	5.25875	45.3593	1.64004e-11	1.96825e-11
FBgn0003889	-8.27704	8.90213	9865.36	0	0
FBgn0003890	-1.30726	6.54605	843.582	1.80657e-185	6.05198e-185
FBgn0003891	0.418972	8.77106	47.0473	6.92925e-12	8.34564e-12
FBgn0003892	-1.07262	4.39075	328.8	1.75456e-73	3.28702e-73
FBgn0003896	-1.64259	2.48221	410.248	3.23716e-91	6.73276e-91
FBgn0003900	-1.91658	0.810375	202.921	4.81423e-46	7.59816e-46
FBgn0003941	0.895381	9.90188	626.113	3.50087e-138	9.36305e-138
FBgn0003942	0.992675	10.3524	720.231	1.19222e-158	3.5223e-158
FBgn0003961	0.209986	3.90724	0.629183	0.427655	0.436329
FBgn0003963	1.24967	4.9423	291.017	2.98514e-65	5.3396e-65
FBgn0003964	1.75121	6.64424	3027.13	0	0
FBgn0003965	-0.885709	4.74839	239.208	5.85354e-54	9.73565e-54
FBgn0003969	2.02329	6.10267	3752.85	0	0
FBgn0003975	-1.73655	3.451	442.752	2.72529e-98	5.92893e-98
FBgn0003977	1.33378	5.5392	931.796	1.20204e-204	4.40268e-204
FBgn0003978	0.264218	4.95474	20.4933	5.98399e-06	6.73376e-06
FBgn0003984	-1.069	4.38638	267.725	3.55347e-60	6.15818e-60
FBgn0003996	-1.212	4.26473	385.39	8.34447e-86	1.67937e-85
FBgn0003997	-0.881193	4.21115	130.919	2.57854e-30	3.63146e-30
FBgn0004003	-2.16306	4.43879	530.851	1.84395e-117	4.43834e-117
FBgn0004009	-2.16915	1.93213	363.102	5.94611e-81	1.16207e-80
FBgn0004028	-1.64755	9.31079	735.802	4.90543e-162	1.46667e-161
FBgn0004047	10.7962	11.2967	1268.95	6.32326e-278	3.15729e-277
FBgn0004049	1.42939	6.57804	1462.93	4.43423917142519e-320	2.58218469142469e-319
FBgn0004050	1.51671	5.81298	1343.04	5.02318e-294	2.68082e-293
FBgn0004055	-0.578784	6.73809	186.108	2.24833e-42	3.44443e-42
FBgn0004057	-1.6729	7.55068	1352.2	5.12809e-296	2.76175e-295
FBgn0004066	0.981202	7.19373	828.367	3.66991e-182	1.21055e-181
FBgn0004087	2.09602	2.99784	549.651	1.49933e-121	3.67431e-121
FBgn0004101	1.12956	5.05639	570.935	3.51575e-126	8.81689e-126
FBgn0004102	-1.72916	1.1394	187.219	1.28614e-42	1.97452e-42
FBgn0004103	1.0879	6.99207	1445.2	3.17248562952045e-316	1.82052163935415e-315
FBgn0004106	3.03862	5.9519	2524.13	0	0
FBgn0004107	3.99123	5.45431	3011.17	0	0
FBgn0004108	0.998486	5.04314	473.445	5.70448e-105	1.2863e-104
FBgn0004117	-1.59749	9.55611	678.193	1.65184e-149	4.6701e-149
FBgn0004118	-2.32419	3.28307	1219.71	3.18281e-267	1.52869e-266
FBgn0004132	1.05212	4.79191	338.78	1.17651e-75	2.22838e-75
FBgn0004133	-2.11813	5.68995	2125.74	0	0
FBgn0004167	-0.302905	9.08422	24.7697	6.46041e-07	7.35832e-07
FBgn0004168	-2.40776	2.50183	330.474	7.57646e-74	1.42333e-73
FBgn0004169	-1.57791	9.86584	751.425	1.9654e-165	5.96687e-165
FBgn0004177	1.31691	8.72504	1321.14	2.8802e-289	1.51491e-288
FBgn0004179	0.427838	6.7273	215.787	7.50677e-49	1.20713e-48
FBgn0004197	-1.61905	2.09473	365.319	1.95596e-81	3.83527e-81
FBgn0004198	-1.22716	5.48457	235.428	3.90524e-53	6.45774e-53
FBgn0004227	0.85754	6.97516	724.43	1.45664e-159	4.31426e-159
FBgn0004228	-0.686606	5.212	85.9593	1.83675e-20	2.38764e-20
FBgn0004237	1.20285	7.64339	1751.55	0	0
FBgn0004242	-2.21825	8.45228	738.25	1.4395e-162	4.31212e-162
FBgn0004244	-2.34395	4.78996	277.266	2.96004e-62	5.20124e-62
FBgn0004359	1.17956	5.09349	652.276	7.14806e-144	1.96053e-143
FBgn0004360	-1.96225	1.86204	329.506	1.23118e-73	2.30926e-73
FBgn0004362	2.30354	9.04049	1904.66	0	0
FBgn0004363	0.0309854	10.1674	0.522063	0.469963	0.478823
FBgn0004364	-0.669067	5.68402	278.093	1.95508e-62	3.44113e-62
FBgn0004366	-2.11776	5.26917	1629.08	0	0
FBgn0004367	1.77225	3.85886	548.373	2.8435e-121	6.95577e-121
FBgn0004368	0.481788	6.69815	124.052	8.20579e-29	1.14205e-28
FBgn0004369	-0.278912	6.26509	31.6195	1.87532e-08	2.17847e-08
FBgn0004370	0.358799	6.25612	55.4438	9.61681e-14	1.1802e-13
FBgn0004373	0.103967	7.96844	9.03607	0.00264704	0.00286256
FBgn0004374	-0.608492	5.97605	209.014	2.25372e-47	3.59114e-47
FBgn0004378	3.86765	6.05396	3169.23	0	0
FBgn0004379	0.99772	6.56219	570.738	3.87912e-126	9.72298e-126
FBgn0004380	-0.773281	4.75619	158.097	2.94717e-36	4.33796e-36
FBgn0004381	1.00361	5.62624	663.323	2.82926e-146	7.86951e-146
FBgn0004387	0.772268	6.72882	423.072	5.23381e-94	1.10779e-93
FBgn0004390	1.88428	6.7862	1869.48	0	0
FBgn0004391	0.810994	6.44439	475.991	1.59269e-105	3.60164e-105
FBgn0004394	-0.561372	1.32896	19.5255	9.92648e-06	1.11424e-05
FBgn0004395	0.610197	5.86409	142.033	9.56507e-33	1.36952e-32
FBgn0004396	-0.901704	5.82205	163.97	1.53543e-37	2.27809e-37
FBgn0004397	-0.071866	7.27078	5.4931	0.0190917	0.0203025
FBgn0004400	3.71626	5.42332	3408.35	0	0
FBgn0004401	1.48553	8.59162	2881.58	0	0
FBgn0004406	2.70395	4.86364	2217.13	0	0
FBgn0004407	0.131056	3.92583	4.28071	0.0385473	0.0407082
FBgn0004419	4.02574	9.92622	6173.4	0	0
FBgn0004432	1.19701	9.81506	998.851	3.19183e-219	1.24321e-218
FBgn0004435	-0.268722	8.04486	47.6991	4.96915e-12	5.99174e-12
FBgn0004436	-0.215819	7.43804	33.5558	6.925e-09	8.08216e-09
FBgn0004449	-0.744509	7.88944	207.235	5.50922e-47	8.74906e-47
FBgn0004456	-0.385353	5.83486	94.6043	2.32514e-22	3.08227e-22
FBgn0004462	1.08087	6.48993	1034.4	5.99844e-227	2.42217e-226
FBgn0004463	1.62183	4.90456	1562.05	0	0
FBgn0004465	0.65399	5.83739	424.769	2.2363e-94	4.7408e-94
FBgn0004507	-0.754209	10.2248	202.3	6.57558e-46	1.03556e-45
FBgn0004509	0.328565	7.10965	79.916	3.90678e-19	5.01921e-19
FBgn0004510	1.42867	5.05042	736.704	3.12263e-162	9.3422e-162
FBgn0004511	-0.0906823	-0.200853	0.20996	0.646798	0.653921
FBgn0004512	-2.47829	7.10686	1626.55	0	0
FBgn0004513	-1.55355	4.45302	1062.77	4.08684e-233	1.69812e-232
FBgn0004514	-1.6588	1.29401	228.288	1.40803e-51	2.30815e-51
FBgn0004516	-2.22146	6.9948	2566.49	0	0
FBgn0004552	-2.00551	3.26431	690.141	4.16589e-152	1.19276e-151
FBgn0004556	2.49265	4.68889	3141.29	0	0
FBgn0004567	-1.27869	0.382074	73.1421	1.20645e-17	1.53065e-17
FBgn0004569	-1.09279	3.80996	306.675	1.15772e-68	2.11036e-68
FBgn0004573	-2.22093	0.994615	241.115	2.24674e-54	3.74668e-54
FBgn0004574	-0.472254	7.02849	273.187	2.29278e-61	4.00348e-61
FBgn0004575	-2.11192	6.61372	1034.35	6.14979e-227	2.48222e-226
FBgn0004577	-0.830939	0.510735	18.7736	1.47191e-05	1.64693e-05
FBgn0004580	-1.9651	6.47153	1441.56	1.95363696074878e-315	1.11702205190733e-314
FBgn0004581	-5.72064	5.25961	5963.5	0	0
FBgn0004583	-0.521916	6.20365	92.6663	6.18987e-22	8.16538e-22
FBgn0004584	2.9161	6.15146	4535.8	0	0
FBgn0004587	0.984807	7.9943	1599.36	0	0
FBgn0004595	-2.57699	6.90341	502.807	2.32885e-111	5.42596e-111
FBgn0004597	0.875967	4.26155	368.919	3.21829e-82	6.34334e-82
FBgn0004598	2.55382	8.2738	5853.45	0	0
FBgn0004606	0.641595	6.28851	185.198	3.55236e-42	5.43603e-42
FBgn0004607	-1.83743	5.05684	395.562	5.09273e-88	1.03932e-87
FBgn0004611	0.11693	6.94059	11.2149	0.000811445	0.000885817
FBgn0004618	-1.69432	3.13717	415.662	2.14596e-92	4.4889e-92
FBgn0004619	-1.79886	2.39044	386.55	4.66674e-86	9.40809e-86
FBgn0004620	-1.56949	3.01454	312.721	5.57864e-70	1.0278e-69
FBgn0004622	-1.43391	2.35536	297.458	1.17922e-66	2.12741e-66
FBgn0004623	-1.89442	7.19464	1750.82	0	0
FBgn0004629	-2.16696	8.05597	373.093	3.97042e-83	7.86186e-83
FBgn0004635	-1.82676	3.97242	645.09	2.61167e-142	7.10751e-142
FBgn0004636	0.696053	7.64436	315.857	1.15722e-70	2.1404e-70
FBgn0004638	0.547248	6.98267	288.039	1.33003e-64	2.37055e-64
FBgn0004643	2.83257	6.24267	3642.05	0	0
FBgn0004644	-1.28378	2.59758	223.6	1.48327e-50	2.41184e-50
FBgn0004646	0.00674911	6.94711	0.0248186	0.87482	0.877883
FBgn0004647	1.52031	6.51821	859.22	7.19687e-189	2.44911e-188
FBgn0004648	-0.0642637	8.04067	4.73072	0.0296285	0.031363
FBgn0004649	10.58	9.9825	1922.99	0	0
FBgn0004650	6.49048	6.87069	10026.6	0	0
FBgn0004652	-1.20845	5.64382	689.884	4.73718e-152	1.35551e-151
FBgn0004654	-0.650885	7.91231	130.3	3.52311e-30	4.95731e-30
FBgn0004655	2.69952	7.82504	5117.97	0	0
FBgn0004656	1.69991	8.48148	1063.62	2.66034e-233	1.10637e-232
FBgn0004666	2.07716	4.21803	1073.27	2.12906e-235	8.93278e-235
FBgn0004687	0.159275	7.40677	28.4602	9.56437e-08	1.10171e-07
FBgn0004698	1.38743	7.28304	1718.33	0	0
FBgn0004784	-1.84851	6.57725	1228.63	3.66139e-269	1.76662e-268
FBgn0004795	2.40609	7.65596	3279.38	0	0
FBgn0004797	-0.185434	5.14786	7.56208	0.00596092	0.0064045
FBgn0004811	1.3929	6.29664	1051.34	1.24481e-230	5.12501e-230
FBgn0004832	1.02577	3.92763	353.238	8.35682e-79	1.61122e-78
FBgn0004837	1.8809	5.31804	1509.85	0	0
FBgn0004838	1.2472	10.1391	800.282	4.6865e-176	1.50749e-175
FBgn0004839	-0.537018	2.24089	36.3703	1.63167e-09	1.92067e-09
FBgn0004852	-1.43852	6.22397	1173.2	4.07041e-257	1.86682e-256
FBgn0004854	-2.19585	1.45331	304.742	3.05288e-68	5.55535e-68
FBgn0004855	1.61362	3.963	890.411	1.19254e-195	4.18162e-195
FBgn0004856	1.47075	6.4142	1640.93	0	0
FBgn0004858	-1.38914	5.03856	919.261	6.38004e-202	2.30819e-201
FBgn0004859	-0.542588	5.20388	73.9463	8.02727e-18	1.01953e-17
FBgn0004860	0.232164	5.03827	19.3996	1.06027e-05	1.18944e-05
FBgn0004862	-1.36469	-0.0720853	53.0393	3.2694e-13	3.99157e-13
FBgn0004864	1.94671	6.68779	3158.54	0	0
FBgn0004865	-1.55716	3.61424	619.252	1.08727e-136	2.88747e-136
FBgn0004867	1.40134	10.1008	1377.73	1.45142e-301	7.91129e-301
FBgn0004868	0.443604	8.5553	248.014	7.03641e-56	1.18426e-55
FBgn0004870	-1.52607	0.176976	75.9143	2.96244e-18	3.77622e-18
FBgn0004872	5.2904	6.46812	12214.4	0	0
FBgn0004875	0.92658	8.22683	569.279	8.05639e-126	2.01452e-125
FBgn0004880	-2.23779	5.30891	579.926	3.89141e-128	9.85302e-128
FBgn0004882	0.458733	9.03167	186.501	1.84557e-42	2.83107e-42
FBgn0004885	-1.55154	6.26198	1214.81	3.68418e-266	1.75789e-265
FBgn0004888	0.138351	8.19363	11.4282	0.000723377	0.000790408
FBgn0004889	1.35821	8.21467	1751.88	0	0
FBgn0004892	-1.51027	1.96902	214.48	1.44697e-48	2.32207e-48
FBgn0004893	-1.24155	5.03961	1017.28	3.15405e-223	1.25222e-222
FBgn0004901	3.0941	5.18039	4014.32	0	0
FBgn0004903	-0.260092	6.2945	62.838	2.24432e-15	2.78793e-15
FBgn0004907	0.0472029	8.5985	4.21077	0.0401681	0.0424009
FBgn0004908	-0.229876	3.21503	20.4543	6.10726e-06	6.87166e-06
FBgn0004910	-1.56386	6.26816	762.23	8.79622e-168	2.71052e-167
FBgn0004913	2.33158	6.80381	1408.87	2.47906e-308	1.38479e-307
FBgn0004914	-0.416766	7.29209	268.14	2.88552e-60	5.0052e-60
FBgn0004915	0.521245	5.64606	215.458	8.85586e-49	1.42335e-48
FBgn0004919	-2.00567	6.40301	1163.03	6.60803e-255	3.01167e-254
FBgn0004921	0.0242153	5.17746	0.29158	0.58921	0.597487
FBgn0004924	1.85422	7.72659	3592.16	0	0
FBgn0004926	1.17826	7.69067	1697.38	0	0
FBgn0004956	-5.2302	4.56792	5674.95	0	0
FBgn0004957	2.35985	3.67956	166.763	3.76887e-38	5.61117e-38
FBgn0004959	1.19617	0.637182	61.6519	4.09871e-15	5.08147e-15
FBgn0005198	0.740914	6.70255	501.393	4.73001e-111	1.10095e-110
FBgn0005278	0.61826	8.73821	312.189	7.28562e-70	1.33995e-69
FBgn0005322	0.645559	5.90411	365.097	2.18692e-81	4.28636e-81
FBgn0005355	1.18155	5.06141	680.082	6.41208e-150	1.81663e-149
FBgn0005386	1.34666	6.79929	871.67	1.41398e-191	4.86609e-191
FBgn0005391	11.973	11.3944	961.226	4.81439e-211	1.81393e-210
FBgn0005410	-0.305229	7.68743	58.672	1.86272e-14	2.2997e-14
FBgn0005411	1.00277	6.55802	1039.48	4.72015e-228	1.91911e-227
FBgn0005427	1.64793	6.6268	2187.16	0	0
FBgn0005533	0.834251	9.47982	549.66	1.4926e-121	3.65877e-121
FBgn0005536	-0.334079	8.32213	94.0712	3.04378e-22	4.02813e-22
FBgn0005558	-2.744	3.18037	1500.23	0	0
FBgn0005561	-2.48422	3.10948	1108.96	3.72416e-243	1.61261e-242
FBgn0005564	-1.58301	3.7929	862.577	1.34038e-189	4.58114e-189
FBgn0005585	0.0729336	9.09455	3.09344	0.0786086	0.0822074
FBgn0005586	-2.00229	6.17001	1942.05	0	0
FBgn0005592	-1.24814	2.96166	180.228	4.32094e-41	6.55278e-41
FBgn0005593	1.02856	10.1896	971.975	2.2178e-213	8.45714e-213
FBgn0005596	3.92157	6.84433	5092.47	0	0
FBgn0005612	-0.841159	5.86693	268.97	1.90253e-60	3.30375e-60
FBgn0005613	-2.3847	2.2211	133.462	7.16501e-31	1.01255e-30
FBgn0005614	-1.90094	8.60616	1510.14	0	0
FBgn0005616	-1.78347	4.19842	1431.22	3.4554372760767e-313	1.96264686605963e-312
FBgn0005617	2.67917	7.07962	3612.15	0	0
FBgn0005619	-2.11745	3.6819	982.855	9.57279e-216	3.68157e-215
FBgn0005624	1.97279	4.54328	1196.48	3.55896e-262	1.66537e-261
FBgn0005626	-1.50168	5.82488	421.462	1.17254e-93	2.47406e-93
FBgn0005630	2.00413	9.51816	2452.82	0	0
FBgn0005631	-1.66444	5.032	1096.15	2.27171e-240	9.72548e-240
FBgn0005632	0.914374	8.82971	404.375	6.14669e-90	1.26837e-89
FBgn0005633	-1.30279	7.28944	105.678	8.67414e-25	1.17121e-24
FBgn0005636	-2.70631	3.90144	1044.42	3.97106e-229	1.62292e-228
FBgn0005638	-0.44352	2.95164	13.1111	0.000293548	0.000322613
FBgn0005640	0.338368	6.8545	123.17	1.28002e-28	1.7773e-28
FBgn0005642	2.30606	6.26654	2817.54	0	0
FBgn0005648	0.529917	6.41028	172.965	1.66566e-39	2.49995e-39
FBgn0005649	1.82201	8.11633	3525.37	0	0
FBgn0005654	-0.758108	6.59378	337.044	2.80934e-75	5.31465e-75
FBgn0005655	6.02109	6.74345	10024.1	0	0
FBgn0005658	-1.95235	1.238	264.224	2.06017e-59	3.54752e-59
FBgn0005659	-1.52323	5.26287	1203.23	1.21218e-263	5.70896e-263
FBgn0005660	-0.862888	1.16237	39.6773	2.99584e-10	3.55078e-10
FBgn0005664	-0.0371256	1.42513	0.0294359	0.863776	0.867077
FBgn0005666	-2.03431	10.4865	266.091	8.069e-60	1.39478e-59
FBgn0005670	-0.267513	3.18473	9.96451	0.00159586	0.00173174
FBgn0005671	0.055067	9.89327	6.22851	0.0125709	0.0134195
FBgn0005672	-0.182194	6.14988	26.6362	2.45604e-07	2.81434e-07
FBgn0005674	1.41089	7.51575	1756.02	0	0
FBgn0005677	-1.35432	2.96506	378.978	2.07665e-84	4.14147e-84
FBgn0005683	0.662518	5.03973	137.144	1.12149e-31	1.59321e-31
FBgn0005694	1.92722	7.23522	3633.5	0	0
FBgn0005695	2.20499	7.01377	4374.23	0	0
FBgn0005696	1.21704	5.69813	567.751	1.73207e-125	4.32538e-125
FBgn0005771	-0.993643	5.43966	583.766	5.68748e-129	1.44899e-128
FBgn0005775	-2.12936	4.42744	1518.98	0	0
FBgn0005777	1.85322	6.72084	3091.4	0	0
FBgn0008635	0.318171	7.3875	69.5123	7.59395e-17	9.55889e-17
FBgn0008636	-2.00651	0.375994	125.324	4.32333e-29	6.02768e-29
FBgn0008646	-1.39894	1.0943	113.425	1.74148e-26	2.38063e-26
FBgn0008651	-2.14739	1.29327	293.424	8.92238e-66	1.60203e-65
FBgn0008654	-0.578485	4.62174	86.9898	1.0908e-20	1.42069e-20
FBgn0010015	-1.64029	4.22591	695.244	3.23496e-153	9.32145e-153
FBgn0010019	-2.23916	13.4753	2016.83	0	0
FBgn0010039	-0.241272	5.72123	14.0356	0.000179378	0.00019769
FBgn0010040	-0.848758	0.848597	28.3759	9.98996e-08	1.15017e-07
FBgn0010041	-1.64198	3.18281	40.1585	2.34171e-10	2.77862e-10
FBgn0010043	-1.53291	1.35842	71.5991	2.6368e-17	3.33818e-17
FBgn0010051	0.0238553	7.30871	0.284805	0.593569	0.601842
FBgn0010052	-0.492269	2.45221	10.7303	0.00105398	0.00114833
FBgn0010053	-1.72642	6.92398	639.977	3.37956e-141	9.14726e-141
FBgn0010078	0.84323	9.49181	277.68	2.40494e-62	4.22978e-62
FBgn0010105	-2.22012	3.27747	1089.46	6.45593e-239	2.74275e-238
FBgn0010113	2.80908	5.84036	2174.92	0	0
FBgn0010114	-1.94427	6.73475	2487.81	0	0
FBgn0010173	1.24236	7.6054	1482.54	0	0
FBgn0010194	1.03475	3.94774	277.245	2.99142e-62	5.25541e-62
FBgn0010213	-0.471551	7.31721	69.8925	6.26268e-17	7.8884e-17
FBgn0010215	1.21588	7.27812	666.945	4.61215e-147	1.2874e-146
FBgn0010217	-0.48945	11.4948	108.059	2.60922e-25	3.5311e-25
FBgn0010220	1.24218	4.56423	831.719	6.8552e-183	2.27074e-182
FBgn0010222	-0.670161	4.72614	35.2659	2.87619e-09	3.37554e-09
FBgn0010223	-0.221971	4.32528	10.9086	0.000957204	0.00104349
FBgn0010225	-1.73656	9.31119	1024.36	9.08871e-225	3.63587e-224
FBgn0010226	-1.79901	8.84082	975.472	3.85366e-214	1.47189e-213
FBgn0010228	-1.1349	6.90225	605.973	8.40806e-134	2.19776e-133
FBgn0010235	0.59825	6.7905	485.488	1.36666e-107	3.12639e-107
FBgn0010238	0.117631	6.89501	12.3588	0.000438923	0.00048104
FBgn0010240	-1.62407	3.27736	700.239	2.6533e-154	7.68758e-154
FBgn0010241	-1.7158	6.69971	332.893	2.25316e-74	4.24212e-74
FBgn0010246	-0.290069	7.32946	37.6282	8.55972e-10	1.00997e-09
FBgn0010263	-2.10128	8.49306	1379.54	5.87131e-302	3.20954e-301
FBgn0010265	1.01789	9.58799	918.144	1.11558e-201	4.02982e-201
FBgn0010269	1.21648	5.90549	973.396	1.08905e-213	4.15622e-213
FBgn0010278	2.7943	6.83267	4663.93	0	0
FBgn0010280	0.861293	7.94425	865.992	2.42577e-190	8.31478e-190
FBgn0010282	1.38696	6.3886	1173.96	2.78036e-257	1.27702e-256
FBgn0010287	1.00433	3.31724	212.844	3.29225e-48	5.26726e-48
FBgn0010288	0.367411	7.44223	141.205	1.45128e-32	2.07448e-32
FBgn0010292	1.88846	5.01704	1622.15	0	0
FBgn0010300	4.63782	7.58695	4402.64	0	0
FBgn0010303	1.50001	6.91929	1565.18	0	0
FBgn0010309	0.132716	4.67462	3.62174	0.0570294	0.0599119
FBgn0010313	1.5579	7.40908	1158.55	6.23161e-254	2.83056e-253
FBgn0010314	2.55508	5.5711	2665	0	0
FBgn0010315	3.35212	6.21939	5266.75	0	0
FBgn0010316	1.32717	5.65168	966.298	3.80243e-212	1.44126e-211
FBgn0010317	4.31737	5.06222	3792.99	0	0
FBgn0010328	2.83034	8.41126	4734.36	0	0
FBgn0010333	1.19621	6.89913	1904.69	0	0
FBgn0010339	1.0777	5.84873	760.823	1.77915e-167	5.47167e-167
FBgn0010340	0.447131	4.10305	84.0053	4.93444e-20	6.39334e-20
FBgn0010341	0.858981	7.71874	796.021	3.95479e-175	1.26481e-174
FBgn0010342	3.97986	6.52454	4782.51	0	0
FBgn0010348	0.561881	9.00917	248.076	6.82298e-56	1.14874e-55
FBgn0010350	-0.769838	7.57891	834.63	1.59618e-183	5.30208e-183
FBgn0010352	-1.51162	10.6422	1630.48	0	0
FBgn0010355	0.603383	7.23568	294.148	6.20628e-66	1.11541e-65
FBgn0010356	1.95313	4.78535	1717.01	0	0
FBgn0010379	0.856898	7.28269	660.936	9.35014e-146	2.59309e-145
FBgn0010380	0.695654	7.09495	751.88	1.56572e-165	4.75803e-165
FBgn0010381	0.547265	5.47409	5.79421	0.016079	0.0171373
FBgn0010383	0.174925	4.78962	8.60589	0.00335078	0.00361574
FBgn0010385	2.3453	2.46714	27.6479	1.45529e-07	1.67185e-07
FBgn0010387	-2.01564	8.27823	716.032	9.76026e-158	2.87101e-157
FBgn0010389	-1.14033	4.1231	331.507	4.51373e-74	8.48635e-74
FBgn0010391	0.183836	6.73933	36.9029	1.24162e-09	1.463e-09
FBgn0010395	-0.988945	4.16656	207.906	3.93303e-47	6.25541e-47
FBgn0010397	-0.290736	5.94541	46.6703	8.39934e-12	1.01059e-11
FBgn0010398	0.87328	4.24204	224.069	1.17194e-50	1.90758e-50
FBgn0010399	-1.97703	3.55214	1046.57	1.35396e-229	5.54304e-229
FBgn0010401	-1.99509	3.7527	279.591	9.21756e-63	1.62601e-62
FBgn0010403	-2.21734	3.3624	383.83	1.82448e-85	3.66406e-85
FBgn0010406	0.52076	5.88018	193.473	5.54977e-44	8.60538e-44
FBgn0010407	-2.20268	1.37465	351.717	1.79149e-78	3.44352e-78
FBgn0010408	1.25207	9.72062	945.91	1.02759e-207	3.81694e-207
FBgn0010409	1.12448	10.1142	1109.19	3.32966e-243	1.44311e-242
FBgn0010411	0.988624	9.64366	705.661	1.75625e-155	5.1167e-155
FBgn0010412	0.969789	9.80555	884.966	1.82037e-194	6.35482e-194
FBgn0010414	-1.78203	2.04567	372.434	5.52406e-83	1.09314e-82
FBgn0010415	-0.283337	8.14403	39.876	2.70608e-10	3.20935e-10
FBgn0010416	1.26193	5.48404	1071.89	4.25966e-235	1.78562e-234
FBgn0010417	0.688428	5.44644	225.169	6.7458e-51	1.09973e-50
FBgn0010421	2.03841	5.30655	1971.71	0	0
FBgn0010422	1.33722	5.79996	1025.36	5.52034e-225	2.21211e-224
FBgn0010423	-0.714636	4.3917	70.8482	3.85789e-17	4.8743e-17
FBgn0010424	0.010446	4.35085	0.0251542	0.873983	0.877137
FBgn0010425	0.675097	8.7502	39.4584	3.35117e-10	3.96994e-10
FBgn0010434	-0.999712	7.97465	725.953	6.7952e-160	2.01639e-159
FBgn0010435	-2.24193	9.04344	3614.9	0	0
FBgn0010438	3.17763	5.26321	3166.17	0	0
FBgn0010441	1.63645	4.9142	771.451	8.69678e-170	2.70901e-169
FBgn0010452	-1.41306	2.7842	291.318	2.56708e-65	4.59615e-65
FBgn0010453	-0.777587	2.04906	57.5575	3.28246e-14	4.04406e-14
FBgn0010470	-0.986648	6.93278	475.057	2.54357e-105	5.74643e-105
FBgn0010473	-2.05415	6.5684	724.713	1.26425e-159	3.7468e-159
FBgn0010482	-1.48924	8.48627	541.967	7.03742e-120	1.71219e-119
FBgn0010488	1.0362	10.0442	1089.81	5.42336e-239	2.30718e-238
FBgn0010501	2.92584	5.53499	4524.73	0	0
FBgn0010504	-2.49648	6.7125	4737.79	0	0
FBgn0010516	-0.0856447	7.46681	5.64651	0.0174902	0.0186308
FBgn0010520	2.0161	3.97385	998.721	3.40561e-219	1.32539e-218
FBgn0010531	0.131942	3.81358	4.81706	0.0281794	0.0298391
FBgn0010548	-1.28753	8.60668	1169.67	2.38505e-256	1.09069e-255
FBgn0010551	0.943494	7.90068	926.477	1.72253e-203	6.27262e-203
FBgn0010575	1.63722	8.22779	1420.15	8.77068557313675e-311	4.94599722511356e-310
FBgn0010583	0.562209	6.55416	333.924	1.34339e-74	2.53228e-74
FBgn0010590	0.0148725	6.77927	0.115652	0.733799	0.739113
FBgn0010591	0.572208	6.33001	221.02	5.41982e-50	8.77809e-50
FBgn0010602	1.40926	5.94498	782.256	3.89071e-172	1.22485e-171
FBgn0010607	2.30872	4.07643	1496.74	0	0
FBgn0010611	0.508367	5.97766	156.987	5.15206e-36	7.56922e-36
FBgn0010612	-0.95435	8.53356	276.943	3.48168e-62	6.11217e-62
FBgn0010620	0.268823	5.65906	57.8402	2.84306e-14	3.50454e-14
FBgn0010621	2.57998	7.67785	5026.29	0	0
FBgn0010622	0.662056	4.45587	199.146	3.20798e-45	5.02615e-45
FBgn0010638	0.655098	6.71105	183.124	1.00799e-41	1.53726e-41
FBgn0010651	-2.00357	6.90684	1031.72	2.29237e-226	9.23294e-226
FBgn0010660	1.39311	7.47395	1425.15	7.19815361043402e-312	4.07378448197947e-311
FBgn0010704	0.145432	7.58691	29.3698	5.9802e-08	6.90365e-08
FBgn0010741	1.17665	6.01735	1009.61	1.46048e-221	5.74531e-221
FBgn0010747	-0.267814	7.12858	81.114	2.13066e-19	2.74294e-19
FBgn0010750	1.18179	5.06084	567.598	1.86994e-125	4.66843e-125
FBgn0010762	1.77548	7.0189	2434.73	0	0
FBgn0010768	1.0524	3.96144	406.045	2.66145e-90	5.49908e-90
FBgn0010770	2.9675	5.39958	4412.92	0	0
FBgn0010772	-0.0632373	7.10067	6.33215	0.0118568	0.0126615
FBgn0010774	1.74166	7.64079	1764.75	0	0
FBgn0010786	0.25883	7.48874	42.3246	7.73124e-11	9.22346e-11
FBgn0010803	1.0236	5.81699	791.682	3.47211e-174	1.10484e-173
FBgn0010808	-0.177379	6.36824	17.9734	2.24019e-05	2.50272e-05
FBgn0010812	0.511815	5.20622	124.212	7.57168e-29	1.05442e-28
FBgn0010825	1.58146	8.41498	998.788	3.29348e-219	1.28228e-218
FBgn0010830	0.943874	5.92794	308.94	3.71621e-69	6.79772e-69
FBgn0010877	1.03427	7.31468	1400.57	1.58017e-306	8.76975e-306
FBgn0010894	-0.516279	3.55526	57.4394	3.48562e-14	4.29213e-14
FBgn0010905	1.18397	8.01811	873.428	5.86591e-192	2.02386e-191
FBgn0010909	0.764424	8.19637	581.657	1.63539e-128	4.14746e-128
FBgn0010926	2.67303	5.80108	4230.03	0	0
FBgn0011016	0.953307	6.71577	489.505	1.82584e-108	4.18897e-108
FBgn0011020	3.60035	5.52551	3714.68	0	0
FBgn0011202	0.554042	6.75572	251.989	9.56773e-57	1.62009e-56
FBgn0011204	1.49147	7.89457	2311.32	0	0
FBgn0011205	-0.753362	7.91867	454.774	6.5929e-101	1.45234e-100
FBgn0011206	-3.60214	8.77346	1878.89	0	0
FBgn0011207	1.52892	5.90507	2249.26	0	0
FBgn0011211	-0.564214	11.2328	101.88	5.89961e-24	7.90936e-24
FBgn0011224	0.445296	7.96999	113.482	1.69202e-26	2.31335e-26
FBgn0011225	-1.43731	8.73795	3048.41	0	0
FBgn0011227	-1.7951	7.42515	826.837	7.89416e-182	2.60213e-181
FBgn0011230	-0.605332	9.62024	87.5124	8.37548e-21	1.09221e-20
FBgn0011232	1.32289	6.16107	1445.08	3.36703959004484e-316	1.93099413970745e-315
FBgn0011236	1.98915	6.11119	2659.75	0	0
FBgn0011241	0.284945	4.6052	53.1798	3.04368e-13	3.71887e-13
FBgn0011259	0.233315	5.60752	12.3327	0.000445087	0.000487739
FBgn0011260	2.37804	6.90317	3342.78	0	0
FBgn0011272	1.03212	9.95143	728.156	2.25501e-160	6.70617e-160
FBgn0011274	-1.41041	6.63924	1273.07	8.04412e-279	4.02291e-278
FBgn0011279	-2.35567	2.2088	343.828	9.35703e-77	1.7855e-76
FBgn0011280	-1.81329	7.30561	1054.23	2.9261e-231	1.20681e-230
FBgn0011281	-2.20041	4.55138	333.212	1.91993e-74	3.61688e-74
FBgn0011282	-2.2055	1.73875	214.135	1.72076e-48	2.75911e-48
FBgn0011283	-1.57332	2.82188	155.145	1.30168e-35	1.90853e-35
FBgn0011284	1.20361	10.5352	1180.89	8.69259e-259	4.02575e-258
FBgn0011286	-1.69197	8.39672	522.049	1.51601e-115	3.61314e-115
FBgn0011289	0.551746	6.86211	245.399	2.61599e-55	4.39187e-55
FBgn0011290	1.7577	5.4542	1660.35	0	0
FBgn0011291	1.34179	3.79754	612.264	3.59986e-135	9.48033e-135
FBgn0011293	-2.13521	3.88002	348.187	1.05182e-77	2.01643e-77
FBgn0011294	-2.03418	2.47394	299.684	3.85969e-67	6.98318e-67
FBgn0011296	-0.853273	6.47745	126.434	2.47072e-29	3.45134e-29
FBgn0011297	0.798198	4.98505	332.638	2.5603e-74	4.81846e-74
FBgn0011300	1.20418	6.59468	905.243	7.11403e-199	2.53113e-198
FBgn0011305	0.165959	5.36705	22.2432	2.40205e-06	2.71725e-06
FBgn0011327	-0.163389	6.42058	20.2087	6.94371e-06	7.80723e-06
FBgn0011335	2.09755	4.64303	1343.1	4.86841e-294	2.59969e-293
FBgn0011336	-0.228059	7.34555	26.0285	3.36413e-07	3.84745e-07
FBgn0011361	-0.205311	7.49969	18.2333	1.9543e-05	2.18487e-05
FBgn0011455	-1.09494	7.61763	593.928	3.50372e-131	9.03344e-131
FBgn0011474	2.7799	7.08293	3504.95	0	0
FBgn0011476	0.127893	3.44423	3.92644	0.0475324	0.0500405
FBgn0011481	2.74514	6.13349	1282.13	8.66027e-281	4.37969e-280
FBgn0011509	1.12444	5.2461	1092.69	1.28146e-239	5.46628e-239
FBgn0011554	-0.386035	3.81907	25.4036	4.65052e-07	5.30839e-07
FBgn0011555	0.0271198	6.84782	0.0863635	0.768852	0.773844
FBgn0011556	-0.793605	4.41907	85.8948	1.89764e-20	2.46646e-20
FBgn0011566	1.40376	4.60135	764.933	2.27242e-168	7.01839e-168
FBgn0011570	1.57178	5.67779	2007.49	0	0
FBgn0011571	1.15531	6.51912	529.817	3.09498e-117	7.44384e-117
FBgn0011573	0.191888	6.1824	27.0734	1.95878e-07	2.24699e-07
FBgn0011576	-1.70762	5.38834	1019.25	1.17624e-223	4.67775e-223
FBgn0011581	-2.46537	4.53506	1891.39	0	0
FBgn0011584	-0.722081	7.44862	730.65	6.47052e-161	1.9273e-160
FBgn0011586	1.12927	5.05576	600.439	1.34378e-132	3.49125e-132
FBgn0011589	-1.63082	2.38262	366.632	1.01297e-81	1.98996e-81
FBgn0011591	-0.981434	4.12802	356.283	1.81493e-79	3.51284e-79
FBgn0011592	0.698988	5.36053	215.223	9.96163e-49	1.60053e-48
FBgn0011604	1.92312	7.03708	2186.56	0	0
FBgn0011606	0.5018	7.37638	144.463	2.81376e-33	4.04895e-33
FBgn0011638	2.0965	6.76452	2985.18	0	0
FBgn0011640	1.14454	7.19513	1517.21	0	0
FBgn0011642	-0.913087	6.61088	359.267	4.06693e-80	7.89753e-80
FBgn0011648	1.44703	7.22251	1352.18	5.17263e-296	2.78415e-295
FBgn0011655	1.07309	6.01695	611.529	5.20278e-135	1.36902e-134
FBgn0011656	0.0312333	7.20935	1.00138	0.316978	0.32502
FBgn0011659	3.50246	3.94512	1135.98	5.0041e-249	2.2291e-248
FBgn0011660	2.27687	5.58556	2110.3	0	0
FBgn0011661	0.744227	8.89974	705.586	1.82343e-155	5.31082e-155
FBgn0011666	0.609798	6.74191	139.055	4.28314e-32	6.10853e-32
FBgn0011672	1.14905	6.84176	1043.38	6.67293e-229	2.72243e-228
FBgn0011674	0.587888	4.93103	129.912	4.28389e-30	6.0224e-30
FBgn0011676	-1.56576	2.97058	472.429	9.49047e-105	2.13745e-104
FBgn0011692	4.25731	6.20607	5156.49	0	0
FBgn0011693	-2.20023	7.7206	1802.16	0	0
FBgn0011695	-2.13818	9.55646	1223.48	4.80243e-268	2.31245e-267
FBgn0011701	-2.14658	4.03425	1233.23	3.66908e-270	1.77577e-269
FBgn0011703	5.57038	6.8116	2210.8	0	0
FBgn0011704	4.56131	7.39342	4557.17	0	0
FBgn0011705	2.54162	5.4914	3264.22	0	0
FBgn0011706	-1.51238	0.324259	82.4899	1.06213e-19	1.3709e-19
FBgn0011708	0.249843	6.93554	77.6915	1.20461e-18	1.54384e-18
FBgn0011710	2.32452	6.53932	4623.04	0	0
FBgn0011715	1.98977	5.67718	1866.07	0	0
FBgn0011722	-0.473628	6.20526	38.7645	4.7814e-10	5.65292e-10
FBgn0011723	-1.70409	2.90322	410.576	2.74619e-91	5.71789e-91
FBgn0011725	-0.781358	9.03274	568.437	1.22808e-125	3.06922e-125
FBgn0011726	1.57828	8.07831	1887.38	0	0
FBgn0011737	-0.166935	6.37591	23.3267	1.3669e-06	1.55016e-06
FBgn0011739	1.0837	6.97269	754.773	3.67863e-166	1.12294e-165
FBgn0011740	0.354522	6.43731	90.6165	1.74401e-21	2.29039e-21
FBgn0011741	1.4215	4.7695	1044.09	4.68428e-229	1.91275e-228
FBgn0011742	1.27145	7.3765	2625.23	0	0
FBgn0011745	0.599426	6.25745	412.208	1.21215e-91	2.52941e-91
FBgn0011746	-1.95458	5.16152	951.349	6.75186e-209	2.52082e-208
FBgn0011747	-0.0183177	8.44339	0.160979	0.688256	0.694425
FBgn0011754	-0.531345	6.98007	508.199	1.56375e-112	3.6614e-112
FBgn0011758	-1.29527	0.466077	71.0243	3.52844e-17	4.46102e-17
FBgn0011761	10.2024	10.1268	6535.23	0	0
FBgn0011762	3.64645	3.91015	2547.52	0	0
FBgn0011763	2.10967	7.48039	4402.75	0	0
FBgn0011764	1.12512	6.86858	793.681	1.27632e-174	4.07089e-174
FBgn0011766	1.61167	7.71643	1462.07	6.85071424523472e-320	3.98444180745132e-319
FBgn0011768	0.657534	6.99227	210.009	1.36773e-47	2.18232e-47
FBgn0011769	-0.0184671	3.69809	0.128275	0.720227	0.725675
FBgn0011770	-0.528896	6.55624	71.5308	2.7296e-17	3.45428e-17
FBgn0011771	0.871122	5.7865	464.077	6.23155e-103	1.39056e-102
FBgn0011774	3.21868	5.14507	3140.45	0	0
FBgn0011785	1.77056	7.31811	2299.17	0	0
FBgn0011787	1.65587	5.54926	698.619	5.96925e-154	1.72686e-153
FBgn0011802	2.32324	5.72618	2052.54	0	0
FBgn0011818	-0.0607756	5.49051	1.84207	0.174708	0.180788
FBgn0011822	0.406241	4.05002	14.0998	0.000173359	0.000191123
FBgn0011823	-0.700082	10.5242	386.049	5.99914e-86	1.20813e-85
FBgn0011824	2.59895	5.58829	2562.86	0	0
FBgn0011826	1.55133	1.85083	223.762	1.36748e-50	2.22509e-50
FBgn0011828	-1.14418	6.84727	368.828	3.36758e-82	6.63621e-82
FBgn0011829	-1.37956	1.09354	113.391	1.77168e-26	2.42157e-26
FBgn0011834	-0.5339	4.32792	40.8231	1.66655e-10	1.98122e-10
FBgn0011836	1.51898	5.63289	1387.3	1.20914e-303	6.6598e-303
FBgn0011837	0.985959	6.31378	517.434	1.53072e-114	3.62172e-114
FBgn0012034	-1.67083	9.0104	517.141	1.77266e-114	4.19311e-114
FBgn0012036	-0.545443	8.91065	178.682	9.39975e-41	1.42116e-40
FBgn0012037	-1.58045	7.69849	986.464	1.57193e-216	6.0627e-216
FBgn0012051	-0.817614	5.64736	521.151	2.37698e-115	5.66081e-115
FBgn0012058	-0.000782742	7.30938	0.000498115	0.982194	0.98261
FBgn0012344	-1.95692	3.3214	898.528	2.0508e-197	7.25026e-197
FBgn0013263	0.715851	6.87211	431.223	8.80261e-96	1.88042e-95
FBgn0013269	3.19279	7.7254	6779.03	0	0
FBgn0013272	-0.94971	9.63523	618.007	2.02841e-136	5.38235e-136
FBgn0013303	-0.037143	5.87254	0.875345	0.34948	0.357842
FBgn0013305	-0.98297	7.05219	1107.88	6.38483e-243	2.76218e-242
FBgn0013307	-0.155183	6.17445	3.58188	0.0584131	0.0613315
FBgn0013308	-0.740189	-0.0389544	16.8115	4.12829e-05	4.59308e-05
FBgn0013325	0.970828	9.89684	539.865	2.01788e-119	4.89435e-119
FBgn0013334	-1.36789	7.9873	1009.32	1.68826e-221	6.63586e-221
FBgn0013342	-2.10648	7.93469	2246.97	0	0
FBgn0013343	-0.347023	6.85973	33.5811	6.83522e-09	7.97836e-09
FBgn0013347	0.977993	6.06918	828.446	3.52779e-182	1.16407e-181
FBgn0013432	0.890057	5.15427	589.21	3.72168e-130	9.54854e-130
FBgn0013433	-1.99929	1.48813	286.712	2.5887e-64	4.60608e-64
FBgn0013435	0.938011	3.51737	234.298	6.88628e-53	1.13654e-52
FBgn0013467	-2.16733	6.35974	2322.76	0	0
FBgn0013469	-1.28468	2.67979	227.116	2.53719e-51	4.15268e-51
FBgn0013531	0.96297	3.7622	291.404	2.45809e-65	4.40268e-65
FBgn0013548	4.19721	5.92213	4170.51	0	0
FBgn0013563	0.721667	5.00741	409.325	5.14221e-91	1.06761e-90
FBgn0013576	0.153099	9.07125	25.7075	3.97278e-07	4.53861e-07
FBgn0013717	2.26216	5.59289	2815	0	0
FBgn0013718	0.562494	7.16136	401.093	3.18447e-89	6.53974e-89
FBgn0013720	1.17494	5.33968	869.96	3.32926e-191	1.14407e-190
FBgn0013725	-1.90482	2.55788	650.981	1.36675e-143	3.74322e-143
FBgn0013726	2.36019	7.39342	4816.45	0	0
FBgn0013732	4.07143	6.16869	5627.6	0	0
FBgn0013733	-1.45721	10.0914	347.167	1.75397e-77	3.35978e-77
FBgn0013746	0.928605	5.76688	718.597	2.70237e-158	7.96891e-158
FBgn0013749	0.0340069	6.52275	0.674016	0.411655	0.420367
FBgn0013750	0.579186	6.8964	281.418	3.6865e-63	6.51527e-63
FBgn0013751	-0.888691	0.223717	26.0463	3.33323e-07	3.81258e-07
FBgn0013753	1.35877	4.54565	718.266	3.18947e-158	9.39945e-158
FBgn0013756	2.58041	7.70621	2746.84	0	0
FBgn0013759	-0.0345376	7.64682	1.38792	0.238757	0.245935
FBgn0013762	0.652439	5.10725	298.765	6.12183e-67	1.10675e-66
FBgn0013763	0.105154	8.5046	11.2731	0.000786384	0.000858658
FBgn0013764	1.22547	5.67737	677.678	2.13715e-149	6.03856e-149
FBgn0013765	-0.422098	8.10932	162.982	2.52495e-37	3.73977e-37
FBgn0013767	-2.28162	0.630294	179.708	5.61351e-41	8.50071e-41
FBgn0013770	0.128522	9.40535	13.4509	0.000244888	0.000269385
FBgn0013771	-1.43162	5.57224	381.024	7.44625e-85	1.49067e-84
FBgn0013772	-2.87324	6.08333	196.22	1.39523e-44	2.1759e-44
FBgn0013773	1.55686	4.91215	494.668	1.37449e-109	3.17503e-109
FBgn0013799	1.26187	6.38405	1316.93	2.36378e-288	1.23368e-287
FBgn0013809	-6.0325	6.21424	495.843	7.63069e-110	1.76352e-109
FBgn0013810	-4.53571	6.79314	2901.63	0	0
FBgn0013811	-5.54936	5.22821	3324.79	0	0
FBgn0013812	-2.13805	3.50958	565.141	6.40191e-125	1.59617e-124
FBgn0013813	-2.60417	6.38439	704.969	2.48347e-155	7.22875e-155
FBgn0013949	-0.435411	4.89736	20.088	7.39578e-06	8.31158e-06
FBgn0013953	1.24135	4.3698	525.095	3.29589e-116	7.89294e-116
FBgn0013954	0.81653	7.85743	249.368	3.56664e-56	6.01994e-56
FBgn0013972	-2.16065	4.66189	1767.12	0	0
FBgn0013973	-2.017	4.21748	1505.18	0	0
FBgn0013983	-0.522885	4.04822	86.4433	1.43802e-20	1.87112e-20
FBgn0013984	0.671951	6.38375	89.9736	2.41356e-21	3.16399e-21
FBgn0013987	1.08627	7.17199	1117.63	4.87063e-245	2.12854e-244
FBgn0013995	-0.847942	8.12767	940.295	1.70761e-206	6.30816e-206
FBgn0013997	-0.686065	6.5814	443.807	1.60632e-98	3.50022e-98
FBgn0013998	0.528914	5.99732	298.446	7.18332e-67	1.29816e-66
FBgn0014000	-1.54545	5.42427	808.316	8.39373e-178	2.7222e-177
FBgn0014001	0.638941	6.87116	467.305	1.23632e-103	2.76665e-103
FBgn0014002	-0.0944008	9.38262	5.53201	0.0186716	0.019867
FBgn0014006	0.68563	6.78555	452.874	1.70901e-100	3.75426e-100
FBgn0014007	1.53088	6.58222	1121	8.99347e-246	3.94486e-245
FBgn0014009	-0.121858	7.05412	22.4954	2.10647e-06	2.3843e-06
FBgn0014010	-0.18364	8.15426	44.1479	3.0448e-11	3.64443e-11
FBgn0014011	0.150282	6.24166	13.6745	0.000217383	0.00023924
FBgn0014018	-0.526871	7.30963	76.0074	2.82603e-18	3.6038e-18
FBgn0014019	-1.76964	5.26838	1026.46	3.18414e-225	1.27811e-224
FBgn0014020	-0.17732	8.63831	24.3099	8.20159e-07	9.32801e-07
FBgn0014022	1.8817	4.586	1397.28	8.17363e-306	4.5283e-305
FBgn0014023	0.80835	4.98553	277.795	2.27045e-62	3.99398e-62
FBgn0014026	1.03149	10.7961	678.333	1.5394e-149	4.3574e-149
FBgn0014028	-1.20654	8.64943	734.564	9.11574e-162	2.72378e-161
FBgn0014029	0.851446	6.11122	531.365	1.4258e-117	3.43536e-117
FBgn0014031	-0.670175	5.86597	118.797	1.16029e-27	1.59837e-27
FBgn0014032	1.45999	4.76867	981.269	2.11717e-215	8.13575e-215
FBgn0014033	-1.31446	4.2488	246.859	1.25655e-55	2.11219e-55
FBgn0014037	0.882523	7.57566	523.628	6.87581e-116	1.64162e-115
FBgn0014073	-1.03763	5.2063	497.746	2.93975e-110	6.81402e-110
FBgn0014075	0.888654	7.38376	835.155	1.22717e-183	4.0792e-183
FBgn0014092	1.61595	4.40078	1036.02	2.66008e-227	1.0769e-226
FBgn0014127	2.49496	5.42586	3260.01	0	0
FBgn0014133	2.28878	8.7801	4122.07	0	0
FBgn0014135	-1.1073	3.35127	197.745	6.48608e-45	1.0132e-44
FBgn0014141	0.210511	8.36644	35.5616	2.47117e-09	2.90237e-09
FBgn0014163	0.360859	8.24205	80.6709	2.66623e-19	3.43008e-19
FBgn0014184	-0.627908	10.9249	304.156	4.09603e-68	7.44497e-68
FBgn0014189	2.3133	7.48175	4829.7	0	0
FBgn0014269	1.97971	5.22555	1390.02	3.1018e-304	1.71442e-303
FBgn0014340	1.95384	5.35112	2122.27	0	0
FBgn0014342	0.92761	2.91243	100.014	1.51337e-23	2.02232e-23
FBgn0014343	-0.428588	4.00982	50.1837	1.40009e-12	1.69817e-12
FBgn0014366	1.46321	5.2814	1291.63	7.43392e-283	3.78786e-282
FBgn0014380	-0.973836	4.89654	404.304	6.36952e-90	1.31406e-89
FBgn0014388	-1.10492	4.55141	286.159	3.41598e-64	6.0735e-64
FBgn0014391	-0.608434	8.23286	111.412	4.80567e-26	6.55048e-26
FBgn0014396	-2.21957	8.85005	424.271	2.86942e-94	6.07887e-94
FBgn0014411	1.29021	6.96539	2584.59	0	0
FBgn0014417	2.00424	5.47354	858.324	1.12679e-188	3.83311e-188
FBgn0014427	0.402065	6.50924	33.303	7.88616e-09	9.19372e-09
FBgn0014454	-1.24803	2.26373	17.7776	2.48294e-05	2.77162e-05
FBgn0014455	2.20707	7.62681	1823	0	0
FBgn0014467	0.515969	6.76722	327.37	3.59446e-73	6.7206e-73
FBgn0014469	-0.702144	6.98964	63.8918	1.31446e-15	1.63693e-15
FBgn0014859	-1.87364	2.93086	530.979	1.72972e-117	4.1655e-117
FBgn0014861	5.45657	6.68673	5286.05	0	0
FBgn0014863	-1.45922	8.06804	882.516	6.20472e-194	2.16046e-193
FBgn0014865	-0.0481308	3.43867	0.00723812	0.9322	0.934077
FBgn0014868	0.495579	6.66719	112.343	3.00472e-26	4.10097e-26
FBgn0014869	-0.219932	8.67257	19.3881	1.06668e-05	1.19649e-05
FBgn0014870	0.535517	6.76174	267.383	4.21946e-60	7.30698e-60
FBgn0014877	0.137052	6.73317	12.8982	0.000328894	0.000361165
FBgn0014879	3.01296	6.87758	6392.18	0	0
FBgn0014903	-0.822464	4.55404	129.604	5.00314e-30	7.02729e-30
FBgn0014906	-0.198174	7.36834	39.8773	2.70422e-10	3.20756e-10
FBgn0014930	-0.537957	4.59647	142.574	7.28546e-33	1.04455e-32
FBgn0014931	1.83218	2.46896	580.562	2.83028e-128	7.1701e-128
FBgn0015000	0.842439	5.75911	483.815	3.15985e-107	7.21109e-107
FBgn0015001	-0.634503	3.65384	49.6968	1.79436e-12	2.17415e-12
FBgn0015010	-0.8609	7.49222	179.951	4.96839e-41	7.52861e-41
FBgn0015011	-1.81117	4.68225	860.741	3.36043e-189	1.14686e-188
FBgn0015019	2.54541	7.74225	5319.2	0	0
FBgn0015024	0.0661294	8.35085	3.51408	0.0608494	0.0638824
FBgn0015025	0.876326	3.07389	137.784	8.12591e-32	1.15663e-31
FBgn0015031	-1.01478	7.27503	204.901	1.77952e-46	2.81891e-46
FBgn0015032	-0.124344	1.57098	0.683713	0.408311	0.417043
FBgn0015033	-2.10821	3.93052	504.206	1.15579e-111	2.69552e-111
FBgn0015034	-1.74098	4.54303	155.963	8.62349e-36	1.26477e-35
FBgn0015035	-2.4473	4.8747	205.385	1.39544e-46	2.21087e-46
FBgn0015036	-0.71551	3.45005	107.533	3.4014e-25	4.59989e-25
FBgn0015037	-1.57747	6.88451	639.504	4.28372e-141	1.15812e-140
FBgn0015038	-2.08638	3.10035	290.922	3.13063e-65	5.59772e-65
FBgn0015039	-2.27374	7.77859	518.348	9.68177e-115	2.29417e-114
FBgn0015040	-1.16907	4.81092	131.809	1.64695e-30	2.32292e-30
FBgn0015075	0.376213	5.18029	67.7375	1.8678e-16	2.34268e-16
FBgn0015129	-1.86448	1.56808	251.362	1.311e-56	2.2183e-56
FBgn0015218	1.94337	9.00603	3975.11	0	0
FBgn0015221	-0.420017	9.83787	209.326	1.92731e-47	3.0731e-47
FBgn0015222	-0.386048	9.63089	185.442	3.14316e-42	4.8115e-42
FBgn0015229	1.48703	6.77525	785.144	9.16533e-173	2.89791e-172
FBgn0015239	0.583618	5.65941	243.501	6.78106e-55	1.13562e-54
FBgn0015240	1.17203	5.81466	1117.67	4.7573e-245	2.07997e-244
FBgn0015245	0.869519	8.76788	475.961	1.61674e-105	3.65516e-105
FBgn0015247	-0.0328562	6.70428	1.50405	0.220049	0.226912
FBgn0015268	1.74526	9.71528	2542.49	0	0
FBgn0015269	-0.693849	7.09154	125.348	4.26984e-29	5.95485e-29
FBgn0015270	4.86706	4.8644	3389.76	0	0
FBgn0015271	3.48395	4.01819	1551.89	0	0
FBgn0015277	0.369294	5.12717	86.3851	1.48096e-20	1.92647e-20
FBgn0015278	0.506197	7.42821	281.732	3.14841e-63	5.56533e-63
FBgn0015279	1.39211	6.91672	1264.13	7.03953e-277	3.49831e-276
FBgn0015282	0.794517	7.4208	605.274	1.19291e-133	3.11552e-133
FBgn0015283	0.339135	7.56911	113.116	2.03487e-26	2.78048e-26
FBgn0015286	0.766465	7.13283	307.919	6.20247e-69	1.13346e-68
FBgn0015288	1.12959	9.88738	1180.33	1.14904e-258	5.31628e-258
FBgn0015295	1.28462	5.39915	888.178	3.64624e-195	1.27571e-194
FBgn0015296	0.924813	5.36153	593.795	3.74541e-131	9.65132e-131
FBgn0015299	1.73083	4.91726	1064.77	1.5016e-233	6.25028e-233
FBgn0015320	-0.196246	7.30073	26.7799	2.27994e-07	2.61382e-07
FBgn0015321	1.13836	7.4067	1015.28	8.58374e-223	3.4022e-222
FBgn0015323	-2.01053	3.72453	510.691	4.48679e-113	1.05263e-112
FBgn0015324	0.0811968	9.86965	6.5103	0.0107252	0.0114647
FBgn0015331	1.34023	5.12161	518.424	9.31904e-115	2.20878e-114
FBgn0015336	-0.586848	3.7194	35.8296	2.15346e-09	2.53016e-09
FBgn0015338	0.788082	5.51174	362.221	9.24603e-81	1.80474e-80
FBgn0015359	0.316264	5.80634	61.9071	3.60057e-15	4.46565e-15
FBgn0015360	2.05137	6.19492	3858.5	0	0
FBgn0015371	1.68252	6.97137	1251.2	4.55913e-274	2.24444e-273
FBgn0015372	0.680658	5.6109	352.238	1.37975e-78	2.6548e-78
FBgn0015374	-0.0824841	6.32834	6.83772	0.00892527	0.00955471
FBgn0015376	4.63783	4.87764	3809.65	0	0
FBgn0015379	1.31248	4.99719	751.589	1.81124e-165	5.50062e-165
FBgn0015380	-1.18666	3.04772	316.123	1.01279e-70	1.87362e-70
FBgn0015391	4.0434	6.6678	4397.79	0	0
FBgn0015393	4.17756	5.89353	1908.24	0	0
FBgn0015396	4.98804	6.53337	6998.21	0	0
FBgn0015399	-0.72822	4.54589	212.779	3.40097e-48	5.43936e-48
FBgn0015400	-2.15467	2.28952	479.438	2.83149e-106	6.4307e-106
FBgn0015402	0.607207	5.72269	252.825	6.28763e-57	1.06563e-56
FBgn0015477	1.12574	7.15198	1206.82	2.01381e-264	9.51277e-264
FBgn0015509	0.936641	8.21602	812.525	1.02078e-178	3.32192e-178
FBgn0015513	0.074883	7.53792	3.65524	0.0558931	0.0587573
FBgn0015519	-0.662781	1.67813	35.9647	2.00922e-09	2.36216e-09
FBgn0015520	-2.80726	3.88334	291.252	2.65307e-65	4.74922e-65
FBgn0015521	0.818832	8.72515	435.1	1.26151e-96	2.70953e-96
FBgn0015522	1.5022	6.58142	789.381	1.09883e-173	3.48713e-173
FBgn0015524	-0.942631	1.97656	94.1397	2.94028e-22	3.89171e-22
FBgn0015527	2.81115	6.64127	4047.48	0	0
FBgn0015541	-1.35646	6.55477	702.436	8.83006e-155	2.56389e-154
FBgn0015542	0.312972	8.46534	65.9876	4.53769e-16	5.67256e-16
FBgn0015544	1.04241	5.71162	778.838	2.15331e-171	6.74969e-171
FBgn0015546	3.00969	4.83725	3236.32	0	0
FBgn0015553	7.323	5.83357	7359.37	0	0
FBgn0015558	-1.84439	4.07206	460.779	3.25288e-102	7.22973e-102
FBgn0015561	-1.42267	1.87067	148.712	3.3159e-34	4.8059e-34
FBgn0015565	1.99542	7.57447	1415.97	7.09656586260688e-310	0
FBgn0015568	-1.08337	5.27838	319.381	1.97567e-71	3.66928e-71
FBgn0015569	-2.03003	6.6978	1375.45	4.55264e-301	2.47439e-300
FBgn0015570	-0.872561	5.02484	162.636	3.00486e-37	4.44709e-37
FBgn0015571	-2.48948	6.98891	4312.15	0	0
FBgn0015572	-1.82157	1.88342	268.618	2.27073e-60	3.94168e-60
FBgn0015575	-1.36976	7.29715	1021.91	3.09911e-224	1.23559e-223
FBgn0015576	-1.71668	6.27355	789.691	9.40492e-174	2.98665e-173
FBgn0015577	-1.26419	5.65798	1006.7	6.2717e-221	2.45902e-220
FBgn0015582	0.0266329	5.03585	0.128606	0.719882	0.725405
FBgn0015589	0.568436	6.94609	208.852	2.44516e-47	3.89488e-47
FBgn0015591	-1.83074	4.12172	1070.83	7.21717e-235	3.02137e-234
FBgn0015600	-0.517955	8.57564	194.084	4.08333e-44	6.34298e-44
FBgn0015602	2.08471	5.80274	1745.63	0	0
FBgn0015609	-1.37026	5.49882	264.568	1.73357e-59	2.98786e-59
FBgn0015615	2.5913	6.46994	4400.15	0	0
FBgn0015618	2.45201	3.55842	1111.89	8.60261e-244	3.7353e-243
FBgn0015622	-0.371303	8.47113	168.5	1.57287e-38	2.34764e-38
FBgn0015623	-1.26223	10.4998	1693	0	0
FBgn0015625	4.8222	7.80145	5912.46	0	0
FBgn0015663	-1.04373	4.17113	146.634	9.43367e-34	1.36184e-33
FBgn0015664	1.94854	6.10049	2171.62	0	0
FBgn0015714	-1.27601	5.01354	234.767	5.44321e-53	8.99308e-53
FBgn0015721	-3.24366	2.28008	575.117	4.32793e-127	1.09145e-126
FBgn0015737	0.457337	7.84825	117.112	2.71317e-27	3.72889e-27
FBgn0015754	0.202324	7.85298	45.9098	1.23822e-11	1.48697e-11
FBgn0015756	1.03713	9.72956	867.188	1.33298e-190	4.57069e-190
FBgn0015765	0.600116	4.28416	128.458	8.91294e-30	1.24929e-29
FBgn0015766	-2.01746	10.5148	3326.38	0	0
FBgn0015772	0.355231	7.0584	125.016	5.04877e-29	7.03806e-29
FBgn0015773	-1.00635	4.70562	411.878	1.43035e-91	2.98343e-91
FBgn0015776	-0.024766	8.76268	0.814184	0.366886	0.375259
FBgn0015777	-2.50002	8.59338	3853.91	0	0
FBgn0015778	1.5323	9.69148	1096.01	2.43771e-240	1.04267e-239
FBgn0015781	0.229109	4.804	27.201	1.83365e-07	2.10396e-07
FBgn0015789	1.10369	7.81736	1762.02	0	0
FBgn0015790	0.64505	8.22655	565.565	5.17622e-125	1.29126e-124
FBgn0015791	-0.562069	6.59569	433.121	3.40057e-96	7.28737e-96
FBgn0015793	0.0976728	4.86835	5.46412	0.0194108	0.0206396
FBgn0015794	-0.0909794	5.52644	4.26884	0.0388173	0.0409888
FBgn0015795	-0.35594	8.16847	147.754	5.36834e-34	7.7675e-34
FBgn0015797	0.742268	6.64062	575.224	4.10253e-127	1.03488e-126
FBgn0015799	2.33795	6.98832	2503.62	0	0
FBgn0015801	-0.368294	5.24637	60.4989	7.36206e-15	9.11177e-15
FBgn0015803	0.442492	6.41395	186.572	1.78087e-42	2.73227e-42
FBgn0015805	3.20275	7.23344	5081.67	0	0
FBgn0015806	0.606463	7.63872	252.335	8.04203e-57	1.36223e-56
FBgn0015818	2.3576	4.96554	1704.84	0	0
FBgn0015828	1.74375	5.73928	1817.28	0	0
FBgn0015829	0.202775	4.81399	22.4219	2.18866e-06	2.47645e-06
FBgn0015834	0.910801	7.57057	645.81	1.82152e-142	4.96144e-142
FBgn0015838	2.47591	5.05514	2310.83	0	0
FBgn0015872	-1.84435	6.57337	1438.73	8.06258308064527e-315	4.59601254926543e-314
FBgn0015903	2.25728	6.67223	4074.1	0	0
FBgn0015904	-1.5725	2.32385	332.589	2.6241e-74	4.93756e-74
FBgn0015905	2.29636	5.07649	1871.56	0	0
FBgn0015907	0.24605	6.98316	54.7952	1.3377e-13	1.63954e-13
FBgn0015919	-1.60601	3.19316	448.41	1.60004e-99	3.49862e-99
FBgn0015924	0.160282	7.45435	21.4145	3.6996e-06	4.17358e-06
FBgn0015925	0.879129	5.34908	307.797	6.59282e-69	1.2041e-68
FBgn0015929	4.66456	6.72353	5526.14	0	0
FBgn0015949	0.843951	6.9412	768.269	4.2777e-169	1.32593e-168
FBgn0016013	-1.79452	4.52991	760.262	2.35556e-167	7.24204e-167
FBgn0016031	0.0602049	7.53154	2.93622	0.0866133	0.0904585
FBgn0016032	-1.39908	3.05146	472.716	8.21678e-105	1.85147e-104
FBgn0016034	3.70223	5.89412	3753.37	0	0
FBgn0016038	0.0489564	5.58447	2.01013	0.156252	0.161902
FBgn0016041	2.04426	7.25506	3655.23	0	0
FBgn0016047	-0.826851	0.995774	28.9634	7.37596e-08	8.51079e-08
FBgn0016054	2.50002	1.98434	344.258	7.54266e-77	1.44045e-76
FBgn0016059	1.07239	7.889	1066.91	5.1509e-234	2.1478e-233
FBgn0016061	-1.71773	4.49911	759.873	2.86254e-167	8.79214e-167
FBgn0016070	4.44413	10.0696	6358.93	0	0
FBgn0016075	0.206813	8.01781	11.6912	0.000627976	0.000686801
FBgn0016076	-2.32743	8.07286	546.317	7.9651e-121	1.94389e-120
FBgn0016078	-0.0172668	5.72943	0.19328	0.660201	0.6669
FBgn0016081	-0.983992	7.99906	549.849	1.35789e-121	3.33114e-121
FBgn0016119	-1.01035	8.67067	450.334	6.10111e-100	1.33592e-99
FBgn0016120	-0.678146	8.62431	134.063	5.29317e-31	7.48691e-31
FBgn0016122	-1.08402	7.84779	536.923	8.80859e-119	2.13214e-118
FBgn0016123	-1.44167	8.31574	458.737	9.05096e-102	2.00691e-101
FBgn0016126	-0.860813	7.98809	509.332	8.86354e-113	2.07739e-112
FBgn0016131	3.06294	5.72518	5503.51	0	0
FBgn0016641	1.16478	6.75675	986.005	1.97803e-216	7.62275e-216
FBgn0016650	-1.19226	4.15184	361.462	1.35298e-80	2.63817e-80
FBgn0016660	-0.165755	1.12279	2.0846	0.148791	0.154307
FBgn0016672	-0.0607603	5.97568	2.25636	0.133067	0.138226
FBgn0016675	-2.31755	5.51652	269.343	1.57808e-60	2.74285e-60
FBgn0016684	-1.78981	5.57988	511.784	2.59487e-113	6.10136e-113
FBgn0016685	2.8411	7.4227	4535.8	0	0
FBgn0016687	0.749361	7.87935	409.258	5.31734e-91	1.10325e-90
FBgn0016691	-1.40406	8.86785	559.279	1.20623e-123	2.99405e-123
FBgn0016693	-0.63074	7.88687	741.013	3.61035e-163	1.08494e-162
FBgn0016694	-1.9912	9.23139	698.154	7.53397e-154	2.17819e-153
FBgn0016696	0.522392	7.10853	383.929	1.73589e-85	3.48689e-85
FBgn0016697	0.413755	7.00125	142.803	6.48962e-33	9.31154e-33
FBgn0016698	0.552373	4.57569	144.452	2.83017e-33	4.07194e-33
FBgn0016700	-0.136999	8.15049	19.3405	1.0936e-05	1.22624e-05
FBgn0016701	0.465095	5.72965	214.044	1.80181e-48	2.88808e-48
FBgn0016715	-1.30768	4.02399	314.297	2.5308e-70	4.67182e-70
FBgn0016726	0.888336	8.75433	442.55	3.01615e-98	6.5602e-98
FBgn0016754	0.320835	6.24206	65.6998	5.25122e-16	6.56195e-16
FBgn0016756	-0.512583	8.63703	312.071	7.72637e-70	1.42073e-69
FBgn0016762	1.01779	3.53178	298.023	8.88259e-67	1.60341e-66
FBgn0016792	1.93228	6.82414	1196.77	3.07089e-262	1.43769e-261
FBgn0016794	1.40534	6.43171	908.243	1.58434e-199	5.65399e-199
FBgn0016797	-0.557563	4.34815	71.5296	2.73132e-17	3.45599e-17
FBgn0016917	0.0391927	8.70447	0.95982	0.327232	0.335389
FBgn0016920	-1.51152	1.8888	225.815	4.87535e-51	7.9617e-51
FBgn0016926	-0.491939	8.27347	129.607	4.99509e-30	7.01702e-30
FBgn0016930	-0.182364	6.64684	27.6403	1.46103e-07	1.67804e-07
FBgn0016970	2.28468	3.26139	759.256	3.8979e-167	1.19567e-166
FBgn0016975	-2.14422	6.86534	1122.57	4.10815e-246	1.80533e-245
FBgn0016976	-2.35671	5.30762	701.559	1.36996e-154	3.9717e-154
FBgn0016977	0.657603	8.69438	35.1386	3.0706e-09	3.60102e-09
FBgn0016978	0.970665	5.58452	478.813	3.8728e-106	8.79142e-106
FBgn0016983	2.51892	7.19099	5587.88	0	0
FBgn0016984	1.41709	6.86129	2409.79	0	0
FBgn0017414	0.893779	4.07757	292.906	1.15688e-65	2.07563e-65
FBgn0017418	-0.0232542	7.90169	0.320336	0.571405	0.579681
FBgn0017429	0.492845	5.31116	116.044	4.64857e-27	6.37771e-27
FBgn0017430	1.26429	4.7928	549.768	1.41411e-121	3.46817e-121
FBgn0017448	1.06466	5.05986	255.479	1.65955e-57	2.82426e-57
FBgn0017457	1.54397	5.68607	912.708	1.69533e-200	6.07072e-200
FBgn0017482	-0.89519	4.06012	254.029	3.4356e-57	5.83417e-57
FBgn0017545	1.00799	10.7958	576.629	2.0292e-127	5.12146e-127
FBgn0017549	0.17785	6.32191	27.5776	1.50913e-07	1.73286e-07
FBgn0017550	1.74451	7.31349	3478.97	0	0
FBgn0017551	2.46344	5.68214	2449.79	0	0
FBgn0017558	-0.238852	7.63162	38.449	5.62041e-10	6.63988e-10
FBgn0017561	1.54139	6.14831	780.768	8.19313e-172	2.57588e-171
FBgn0017566	-0.742286	9.35733	323.959	1.98903e-72	3.70499e-72
FBgn0017567	-1.31389	7.93738	986.576	1.48636e-216	5.73499e-216
FBgn0017572	0.0473429	6.62592	3.36829	0.0664626	0.0696748
FBgn0017577	5.20266	6.7671	6909.01	0	0
FBgn0017578	0.423745	5.05899	132.662	1.07215e-30	1.51356e-30
FBgn0017579	1.17456	9.67682	1167.15	8.40255e-256	3.83693e-255
FBgn0017581	-0.0565229	10.4762	1.62967	0.201749	0.208449
FBgn0017590	-2.03933	4.41562	1996.47	0	0
FBgn0019624	-0.866519	9.23321	253.398	4.71714e-57	8.00179e-57
FBgn0019637	2.34472	5.90859	2621.84	0	0
FBgn0019643	-1.87519	7.96318	1245.87	6.5593e-273	3.21406e-272
FBgn0019644	-0.801958	9.12917	180.343	4.07837e-41	6.1859e-41
FBgn0019650	-2.05498	4.23395	997.079	7.74914e-219	3.01331e-218
FBgn0019662	0.00199565	6.01232	0.00601208	0.938196	0.939885
FBgn0019686	5.20841	7.52378	6615.43	0	0
FBgn0019830	-0.0644601	7.08775	3.02165	0.0821597	0.0858546
FBgn0019886	-0.435224	8.21387	245.164	2.94265e-55	4.93854e-55
FBgn0019890	-1.13253	7.8445	1786.89	0	0
FBgn0019925	0.756405	7.20245	687.039	1.96829e-151	5.61511e-151
FBgn0019928	-0.794047	5.07734	36.5668	1.47523e-09	1.73761e-09
FBgn0019929	-1.80691	5.42006	1324.09	6.57209e-290	3.46252e-289
FBgn0019932	-1.1391	6.09512	547.232	5.03795e-121	1.23016e-120
FBgn0019936	1.21743	9.71411	986.841	1.30177e-216	5.02688e-216
FBgn0019938	2.58236	6.1661	3826.06	0	0
FBgn0019940	-2.3282	6.21554	2638.44	0	0
FBgn0019947	0.471309	6.08773	234.746	5.50139e-53	9.08603e-53
FBgn0019948	-1.4608	6.49418	2026.18	0	0
FBgn0019949	0.989345	4.40985	484.769	1.95909e-107	4.47731e-107
FBgn0019952	-1.25812	4.82981	397.33	2.10008e-88	4.29416e-88
FBgn0019957	-1.00498	8.19706	457.681	1.5362e-101	3.40231e-101
FBgn0019960	-0.637263	8.53399	666.999	4.48998e-147	1.25367e-146
FBgn0019968	-0.982369	7.38868	746.959	1.83932e-164	5.56265e-164
FBgn0019972	1.89524	5.53218	2025.46	0	0
FBgn0019982	-0.574944	5.91189	149.951	1.77651e-34	2.58032e-34
FBgn0019985	-1.96549	3.06085	412.94	8.39894e-92	1.75378e-91
FBgn0019990	1.32868	6.42421	1460.47	1.5246371765015e-319	8.84570191657709e-319
FBgn0020018	-0.804886	5.49677	325.129	1.10615e-72	2.06329e-72
FBgn0020224	1.98842	7.50054	2965.27	0	0
FBgn0020235	-0.444645	8.72315	41.1328	1.42228e-10	1.6921e-10
FBgn0020236	-1.12221	9.5232	425.084	1.90886e-94	4.04847e-94
FBgn0020238	0.891622	9.52261	1060.67	1.16455e-232	4.8282e-232
FBgn0020245	0.975108	5.89785	753.607	6.59498e-166	2.00801e-165
FBgn0020248	4.40495	4.70382	2478.06	0	0
FBgn0020249	0.309305	5.99685	95.1932	1.72685e-22	2.29011e-22
FBgn0020251	0.0022476	5.71412	0.00361371	0.952065	0.953476
FBgn0020255	2.41678	8.89216	3968.08	0	0
FBgn0020257	-1.41528	5.65691	1346.85	7.44003e-295	3.99321e-294
FBgn0020258	-0.877087	1.20157	50.5949	1.13541e-12	1.37891e-12
FBgn0020261	0.501771	7.12316	207.639	4.49781e-47	7.14767e-47
FBgn0020269	-1.77071	4.49522	859.663	5.76613e-189	1.96435e-188
FBgn0020270	1.9315	4.99306	1495.62	0	0
FBgn0020272	2.06279	4.26184	1057.06	7.10276e-232	2.9345e-231
FBgn0020277	-2.24248	1.02218	175.425	4.8353e-40	7.27912e-40
FBgn0020278	0.511914	5.92789	197.814	6.26501e-45	9.78824e-45
FBgn0020279	1.53806	9.1727	2069.78	0	0
FBgn0020294	-1.56729	5.09741	868.706	6.23724e-191	2.14026e-190
FBgn0020299	-1.53406	5.44175	1155.34	3.10077e-253	1.40306e-252
FBgn0020300	-4.27503	5.95556	2377.63	0	0
FBgn0020304	-0.0695134	7.76969	4.96125	0.0259215	0.0274728
FBgn0020305	2.19292	4.40114	1557.45	0	0
FBgn0020306	2.34115	9.32763	2642.59	0	0
FBgn0020307	-1.06148	4.65175	321.284	7.60894e-72	1.41538e-71
FBgn0020309	0.586196	7.38551	162.31	3.5399e-37	5.23731e-37
FBgn0020312	1.97655	5.31396	1172.21	6.68631e-257	3.06211e-256
FBgn0020369	0.964963	7.31882	766.491	1.04184e-168	3.22193e-168
FBgn0020370	1.54874	7.52121	2526.19	0	0
FBgn0020372	-2.20372	5.74352	1965.69	0	0
FBgn0020378	-1.16258	3.5138	273.41	2.04953e-61	3.58005e-61
FBgn0020379	0.586668	5.28659	238.977	6.57447e-54	1.0929e-53
FBgn0020381	0.745366	4.58816	240.578	2.94246e-54	4.90514e-54
FBgn0020385	-0.877497	7.20725	114.107	1.23488e-26	1.69005e-26
FBgn0020386	0.532034	8.49006	274.616	1.11895e-61	1.95852e-61
FBgn0020388	0.620682	5.59554	212.166	4.62694e-48	7.39388e-48
FBgn0020389	1.31913	5.18049	610.045	1.09371e-134	2.87393e-134
FBgn0020391	-0.435543	1.83222	21.7682	3.07658e-06	3.47448e-06
FBgn0020392	2.88966	6.67852	5884.65	0	0
FBgn0020407	-1.37744	6.15192	1235.13	1.41355e-270	6.85183e-270
FBgn0020412	0.844566	7.12591	586.381	1.53488e-129	3.92412e-129
FBgn0020414	-1.81849	7.40469	1121.11	8.51256e-246	3.73565e-245
FBgn0020415	-0.43811	6.98792	101.453	7.31944e-24	9.80452e-24
FBgn0020416	-0.754294	5.50817	126.181	2.80733e-29	3.91982e-29
FBgn0020439	-1.55701	9.08965	2128.25	0	0
FBgn0020440	0.853651	6.18565	523.639	6.83736e-116	1.63285e-115
FBgn0020443	1.304	8.3565	2440.94	0	0
FBgn0020445	3.30458	6.19583	5534.95	0	0
FBgn0020493	-0.214836	6.164	19.1995	1.17747e-05	1.31951e-05
FBgn0020496	1.41404	8.53754	1620.17	0	0
FBgn0020497	1.38431	8.02494	1552.37	0	0
FBgn0020503	-1.73907	9.29024	2037.26	0	0
FBgn0020506	-3.63568	3.66078	173.381	1.35118e-39	2.02892e-39
FBgn0020508	-0.0256228	4.8827	0.040448	0.840607	0.844178
FBgn0020510	1.05879	6.37358	1042.19	1.21138e-228	4.93583e-228
FBgn0020521	-1.42354	6.46864	935.9	1.54121e-205	5.66909e-205
FBgn0020545	-0.974784	6.54206	89.1708	3.62154e-21	4.73902e-21
FBgn0020616	2.21521	5.74181	2392.2	0	0
FBgn0020617	-3.34257	1.64244	432.927	3.74793e-96	8.02631e-96
FBgn0020618	1.16401	10.3286	592.228	8.20749e-131	2.10919e-130
FBgn0020620	0.558774	6.69922	365.103	2.1797e-81	4.2731e-81
FBgn0020621	0.0233123	7.69974	0.48422	0.486517	0.495316
FBgn0020622	2.23008	7.2497	2825.9	0	0
FBgn0020626	0.0101891	6.93953	0.123878	0.724866	0.730271
FBgn0020633	6.23181	6.49251	10575.2	0	0
FBgn0020647	-0.823328	7.86048	809.305	5.11583e-178	1.66084e-177
FBgn0020653	0.495724	8.63259	248.143	6.5955e-56	1.11064e-55
FBgn0020655	1.41994	6.02643	1301.94	4.28578e-285	2.20515e-284
FBgn0020660	0.30557	7.70592	68.5209	1.25541e-16	1.57627e-16
FBgn0020762	-0.63625	4.43461	128.648	8.09817e-30	1.13576e-29
FBgn0020764	-1.63467	8.01025	1005.97	9.06783e-221	3.55238e-220
FBgn0020766	-0.356681	5.46795	63.3798	1.70455e-15	2.12021e-15
FBgn0020880	0.438773	0.288256	8.36985	0.00381497	0.00411288
FBgn0020887	2.24117	6.65827	2794.71	0	0
FBgn0020906	0.298711	9.86354	7.47009	0.00627326	0.00673932
FBgn0020907	-1.76973	6.50951	1007.7	3.81175e-221	1.49638e-220
FBgn0020909	2.54757	4.06976	1900.71	0	0
FBgn0020910	1.12001	10.7223	939.956	2.02362e-206	7.4697e-206
FBgn0020912	-1.24182	5.03302	490.243	1.26176e-108	2.90045e-108
FBgn0020930	-0.216523	5.64723	45.345	1.65211e-11	1.98249e-11
FBgn0021750	1.73689	3.78417	658.352	3.40983e-145	9.43993e-145
FBgn0021760	-1.39665	8.32085	1243.78	1.86965e-272	9.14233e-272
FBgn0021761	3.8726	6.43597	5855.59	0	0
FBgn0021764	1.75069	6.98425	1331.91	1.3139e-291	6.95722e-291
FBgn0021765	0.979014	6.69335	283.504	1.29438e-63	2.29361e-63
FBgn0021767	-1.02009	2.20902	145.418	1.73994e-33	2.50641e-33
FBgn0021768	0.677331	6.37181	450.347	6.06262e-100	1.3278e-99
FBgn0021776	-0.845893	2.75876	56.1269	6.79411e-14	8.34657e-14
FBgn0021795	0.770843	6.58546	227.097	2.56086e-51	4.19071e-51
FBgn0021796	0.426433	6.61525	127.016	1.84317e-29	2.57776e-29
FBgn0021800	0.822847	6.64051	519.539	5.33071e-115	1.26569e-114
FBgn0021814	-0.16326	4.64776	12.2418	0.000467299	0.000511902
FBgn0021818	1.71815	6.63436	2545.67	0	0
FBgn0021825	0.306892	5.79695	97.1247	6.50973e-23	8.65859e-23
FBgn0021847	0.0654063	5.78719	3.96947	0.0463324	0.0487934
FBgn0021872	-0.305664	8.72073	128.082	1.07688e-29	1.50897e-29
FBgn0021873	0.655183	7.39101	268.159	2.8582e-60	4.95872e-60
FBgn0021874	1.3546	4.27204	545.927	9.68355e-121	2.36268e-120
FBgn0021875	0.977886	3.74702	266.62	6.18776e-60	1.07018e-59
FBgn0021895	1.16473	6.6001	1065.5	1.04339e-233	4.34492e-233
FBgn0021906	-1.47759	9.14627	859.316	6.85828e-189	2.33557e-188
FBgn0021944	0.300081	5.81234	62.7862	2.30409e-15	2.86143e-15
FBgn0021953	-1.84144	7.76058	1907.14	0	0
FBgn0021967	-0.591461	7.40953	174.679	7.03528e-40	1.05775e-39
FBgn0021979	0.0620264	7.87762	4.04245	0.0443694	0.0467679
FBgn0021995	2.37771	5.85757	2514.54	0	0
FBgn0022023	0.708783	8.03704	387.425	3.00884e-86	6.07356e-86
FBgn0022027	-0.063588	3.98408	1.17571	0.278231	0.285879
FBgn0022029	1.14162	5.89567	901.552	4.51335e-198	1.601e-197
FBgn0022069	1.81349	6.95475	2958.66	0	0
FBgn0022153	1.51232	6.81889	2285.65	0	0
FBgn0022160	-1.39652	8.94542	409.226	5.4021e-91	1.12059e-90
FBgn0022213	3.39898	7.28504	7649.68	0	0
FBgn0022224	0.114676	2.59178	2.05439	0.151768	0.157342
FBgn0022238	1.33886	7.48965	1023.44	1.44587e-224	5.77675e-224
FBgn0022246	1.21815	3.0121	309.698	2.54128e-69	4.65483e-69
FBgn0022288	2.22795	5.74273	2454.15	0	0
FBgn0022338	3.7861	6.35564	3916.59	0	0
FBgn0022343	1.21141	6.68823	1186.86	4.36715e-260	2.03349e-259
FBgn0022344	-0.310224	5.57549	50.806	1.01964e-12	1.23911e-12
FBgn0022349	1.30098	7.19648	2901.22	0	0
FBgn0022355	-2.39334	10.0649	167.929	2.0965e-38	3.12526e-38
FBgn0022359	-0.521593	5.09139	36.4136	1.59589e-09	1.87879e-09
FBgn0022361	-0.964379	7.31726	365.022	2.26989e-81	4.44714e-81
FBgn0022382	-0.919018	7.84202	471.095	1.85175e-104	4.16556e-104
FBgn0022699	0.365927	5.25813	86.6208	1.31457e-20	1.71073e-20
FBgn0022700	-0.336198	2.84704	6.70863	0.00959473	0.0102667
FBgn0022702	-1.63784	2.99716	370.588	1.39371e-82	2.74991e-82
FBgn0022708	1.34744	6.76529	1636.77	0	0
FBgn0022709	-2.65593	7.56473	3697.5	0	0
FBgn0022710	-0.220523	6.11196	19.0321	1.28536e-05	1.43956e-05
FBgn0022720	1.98124	6.41749	3589.51	0	0
FBgn0022724	1.93426	4.63642	1263.46	9.86008e-277	4.89227e-276
FBgn0022764	1.81009	8.68035	1748.69	0	0
FBgn0022768	0.537988	7.78352	227.981	1.64327e-51	2.6919e-51
FBgn0022770	-0.791931	2.62045	67.8135	1.79718e-16	2.2544e-16
FBgn0022772	3.84601	6.44832	3372.82	0	0
FBgn0022774	-0.227547	4.45467	3.50488	0.0611882	0.0642239
FBgn0022786	2.93454	5.43641	2884.2	0	0
FBgn0022787	0.484016	6.73661	203.87	2.9877e-46	4.72565e-46
FBgn0022800	-1.48528	3.58728	535.686	1.63672e-118	3.95767e-118
FBgn0022893	3.89388	9.27642	5652.97	0	0
FBgn0022935	1.68727	5.67567	2110.63	0	0
FBgn0022936	2.23983	4.82639	1976.44	0	0
FBgn0022942	2.18435	6.19196	3662.92	0	0
FBgn0022943	0.795181	4.20012	254.763	2.37729e-57	4.04207e-57
FBgn0022959	0.138765	9.22458	17.5373	2.81731e-05	3.14412e-05
FBgn0022960	2.42098	6.18124	2827.77	0	0
FBgn0022981	5.58497	4.3775	2728.2	0	0
FBgn0022984	-0.595091	5.67117	391.002	5.00965e-87	1.01579e-86
FBgn0022985	1.22726	6.46183	1005.68	1.04699e-220	4.09995e-220
FBgn0022986	0.480475	5.5945	123.644	1.00791e-28	1.40112e-28
FBgn0022987	0.754556	6.21922	290.439	3.98879e-65	7.12946e-65
FBgn0023000	-0.656118	2.77285	33.5257	7.03275e-09	8.2069e-09
FBgn0023001	-0.94666	3.86298	292.838	1.1973e-65	2.14773e-65
FBgn0023023	-1.46041	5.33151	916.638	2.3717e-201	8.54772e-201
FBgn0023076	-3.83093	7.31409	2912.39	0	0
FBgn0023081	0.814708	6.66701	643.984	4.54481e-142	1.23365e-141
FBgn0023083	-0.257315	6.09395	29.3466	6.05215e-08	6.98586e-08
FBgn0023090	-2.97478	6.40865	1227.59	6.14072e-269	2.96139e-268
FBgn0023095	-1.58012	6.29589	1530.21	0	0
FBgn0023096	-2.69479	1.43303	370.99	1.13935e-82	2.24943e-82
FBgn0023097	1.95982	7.00864	2230.02	0	0
FBgn0023129	-0.791831	7.25462	106.891	4.70418e-25	6.35807e-25
FBgn0023130	2.16411	4.12248	972.665	1.57047e-213	5.99109e-213
FBgn0023143	1.37136	9.37472	2304.61	0	0
FBgn0023167	2.02955	5.65135	1062.24	5.32729e-233	2.2116e-232
FBgn0023169	0.195298	7.58904	50.0367	1.50897e-12	1.82953e-12
FBgn0023170	0.873673	8.31411	312.419	6.49154e-70	1.1953e-69
FBgn0023171	-0.91419	5.20405	395.721	4.70246e-88	9.60293e-88
FBgn0023172	0.840691	8.27547	381.912	4.77152e-85	9.56429e-85
FBgn0023174	0.713108	7.37308	668.864	1.76442e-147	4.94111e-147
FBgn0023175	0.29687	7.22705	82.1629	1.25322e-19	1.61643e-19
FBgn0023177	3.06017	6.1724	3180.55	0	0
FBgn0023178	-2.17554	3.21763	826.242	1.06312e-181	3.50312e-181
FBgn0023179	-2.06944	5.61752	2681.76	0	0
FBgn0023180	4.93439	3.54133	3401.11	0	0
FBgn0023181	5.12033	4.14005	2460.34	0	0
FBgn0023197	0.199357	9.00975	3.31305	0.0687316	0.0719817
FBgn0023211	-0.12252	6.15788	19.1567	1.20415e-05	1.34925e-05
FBgn0023212	-0.114159	7.36195	15.5753	7.92817e-05	8.78565e-05
FBgn0023213	0.0236734	9.61125	0.209166	0.647422	0.654481
FBgn0023214	-1.39059	1.75456	157.299	4.40473e-36	6.47731e-36
FBgn0023215	1.2811	8.02753	410.373	3.04044e-91	6.3264e-91
FBgn0023216	1.99934	5.59775	1845.98	0	0
FBgn0023388	-0.456347	6.7155	199.72	2.40365e-45	3.76846e-45
FBgn0023395	3.22002	5.32286	1669.66	0	0
FBgn0023407	0.591199	7.25227	178.599	9.80361e-41	1.48198e-40
FBgn0023423	0.945114	7.86939	1013.14	2.50422e-222	9.90898e-222
FBgn0023441	-0.489071	8.26748	253.655	4.1471e-57	7.03734e-57
FBgn0023458	0.34675	8.11322	70.0172	5.87884e-17	7.41183e-17
FBgn0023477	-0.597974	7.70527	68.3085	1.3982e-16	1.75438e-16
FBgn0023479	-1.49536	8.90427	990.095	2.55387e-217	9.88618e-217
FBgn0023489	-2.09508	2.38458	512.48	1.8305e-113	4.30944e-113
FBgn0023495	-1.28429	1.72593	17.8224	2.42516e-05	2.70745e-05
FBgn0023506	0.73454	5.10947	272.975	2.54934e-61	4.45065e-61
FBgn0023507	-1.16607	6.98781	455.563	4.44053e-101	9.79797e-101
FBgn0023508	1.30371	6.48648	1738.31	0	0
FBgn0023510	0.130014	6.3816	10.4658	0.00121603	0.0013229
FBgn0023511	0.611003	5.34503	284.325	8.57255e-64	1.52045e-63
FBgn0023512	1.38429	5.58986	1404	2.8335e-307	1.57719e-306
FBgn0023513	2.28918	4.68335	1745.9	0	0
FBgn0023514	1.96181	4.98107	1222.81	6.72354e-268	3.23585e-267
FBgn0023515	4.30297	7.43272	6000.27	0	0
FBgn0023516	0.0927003	5.73516	7.74037	0.00539996	0.00580708
FBgn0023517	2.18294	5.30407	3077.85	0	0
FBgn0023518	1.37152	6.56018	1119.94	1.52991e-245	6.70141e-245
FBgn0023519	1.21067	4.70491	583.259	7.33038e-129	1.86403e-128
FBgn0023520	1.15524	3.17647	369.712	2.1621e-82	4.26423e-82
FBgn0023521	1.52592	4.06401	917.079	1.90152e-201	6.86362e-201
FBgn0023522	1.93686	5.95946	3707.86	0	0
FBgn0023524	-1.96532	3.34024	639.768	3.75358e-141	1.01567e-140
FBgn0023525	-1.19483	4.36975	496.257	6.20068e-110	1.43409e-109
FBgn0023526	2.53133	6.79736	2755.25	0	0
FBgn0023527	3.21437	5.72433	3494.71	0	0
FBgn0023528	2.29785	7.671	2925.79	0	0
FBgn0023529	0.442183	7.98339	152.267	5.53828e-35	8.07019e-35
FBgn0023530	0.478563	4.59611	83.996	4.95785e-20	6.4228e-20
FBgn0023531	-1.29619	6.11565	602.055	5.98105e-133	1.55692e-132
FBgn0023534	-0.902017	1.92982	91.9457	8.90856e-22	1.17337e-21
FBgn0023535	-0.868981	5.04931	148.513	3.66513e-34	5.31043e-34
FBgn0023536	0.388862	4.99622	102.586	4.12991e-24	5.54623e-24
FBgn0023537	0.974755	7.74686	433.407	2.94668e-96	6.31614e-96
FBgn0023540	-1.36548	7.26868	551.407	6.22026e-122	1.5311e-121
FBgn0023541	-2.88285	4.43717	407.908	1.04594e-90	2.16585e-90
FBgn0023542	0.96386	5.2199	528.015	7.63364e-117	1.83366e-116
FBgn0023545	0.519816	4.73266	172.812	1.79874e-39	2.69925e-39
FBgn0023549	1.17462	6.3523	803.308	1.0302e-176	3.32399e-176
FBgn0023550	-2.03662	5.21297	123.395	1.14296e-28	1.58815e-28
FBgn0024150	-1.90282	2.75367	525.875	2.22997e-116	5.34301e-116
FBgn0024177	7.11455	6.50187	12326.7	0	0
FBgn0024179	-0.36014	5.85312	62.4468	2.73746e-15	3.39828e-15
FBgn0024182	1.39324	4.56064	711.727	8.42659e-157	2.46796e-156
FBgn0024183	-1.17711	8.29763	1181.72	5.72706e-259	2.65364e-258
FBgn0024184	-2.40016	2.64163	609.527	1.41809e-134	3.72215e-134
FBgn0024187	-0.834638	6.99109	894.252	1.74321e-196	6.12846e-196
FBgn0024188	1.72767	6.2573	1666.46	0	0
FBgn0024189	-1.80774	4.18511	669.326	1.40005e-147	3.92421e-147
FBgn0024191	0.889882	4.37493	201.803	8.44098e-46	1.32867e-45
FBgn0024194	2.188	3.38376	1282.1	8.75238e-281	4.42391e-280
FBgn0024196	0.638551	3.99015	140.618	1.95018e-32	2.78551e-32
FBgn0024222	1.49754	5.48739	800.047	5.26937e-176	1.69383e-175
FBgn0024227	2.99422	4.37465	2285.56	0	0
FBgn0024230	1.20045	5.17974	898.756	1.82932e-197	6.46967e-197
FBgn0024232	-1.79074	4.20975	846.657	3.87661e-186	1.30281e-185
FBgn0024234	-1.02407	5.29021	782.861	2.874e-172	9.0598e-172
FBgn0024236	1.47415	7.57845	3220.39	0	0
FBgn0024238	0.823371	7.66516	761.301	1.4004e-167	4.31107e-167
FBgn0024245	1.62495	3.74947	629.923	5.19515e-139	1.39456e-138
FBgn0024248	-0.0288695	6.35081	0.536163	0.464027	0.47298
FBgn0024250	-0.755499	4.20795	140.559	2.00914e-32	2.86929e-32
FBgn0024251	0.227512	7.63224	53.5903	2.46979e-13	3.02001e-13
FBgn0024273	0.325753	6.32094	119.899	6.65624e-28	9.19084e-28
FBgn0024277	-0.224115	7.53685	52.5743	4.14282e-13	5.0514e-13
FBgn0024285	2.33013	6.26776	3733.49	0	0
FBgn0024288	-1.74999	0.939803	169.91	7.74102e-39	1.15797e-38
FBgn0024289	-2.62578	6.93414	164.755	1.0348e-37	1.53677e-37
FBgn0024291	1.0798	7.14942	1089.65	5.85373e-239	2.48803e-238
FBgn0024293	-1.55316	7.83808	928.478	6.32628e-204	2.30816e-203
FBgn0024294	-3.94546	2.61531	692.522	1.26455e-152	3.63379e-152
FBgn0024314	0.248077	6.41526	48.254	3.74435e-12	4.51778e-12
FBgn0024315	-0.989891	7.80833	472.916	7.4331e-105	1.67528e-104
FBgn0024320	-1.09119	7.0328	429.079	2.57792e-95	5.49332e-95
FBgn0024326	1.07501	6.56901	1318.18	1.26903e-288	6.6452e-288
FBgn0024329	1.075	7.38791	895.37	9.95946e-197	3.50788e-196
FBgn0024330	1.2001	4.63352	481.973	7.95299e-107	1.81276e-106
FBgn0024332	5.38827	6.22672	5201.27	0	0
FBgn0024352	2.25588	7.87959	4471.7	0	0
FBgn0024360	1.27951	4.95865	681.632	2.95198e-150	8.3734e-150
FBgn0024361	-0.423987	4.25806	40.3636	2.10837e-10	2.5033e-10
FBgn0024362	1.56035	6.5913	3143.94	0	0
FBgn0024364	2.74025	5.73763	2857.94	0	0
FBgn0024365	1.32947	6.34367	1611.76	0	0
FBgn0024366	-0.351613	2.25763	7.56664	0.00594585	0.00638904
FBgn0024371	1.64489	5.81905	1506.04	0	0
FBgn0024432	-0.0714661	6.6307	3.29416	0.0695268	0.0727984
FBgn0024491	1.5866	4.49266	876.059	1.57152e-192	5.4419e-192
FBgn0024509	0.775466	6.64828	492.774	3.55066e-109	8.1859e-109
FBgn0024510	1.62347	4.88106	938.191	4.894e-206	1.80439e-205
FBgn0024542	1.14755	4.32633	455.685	4.17815e-101	9.22334e-101
FBgn0024555	0.784256	7.66033	565.449	5.48597e-125	1.36816e-124
FBgn0024556	0.890544	6.90411	519.951	4.3372e-115	1.03032e-114
FBgn0024558	2.90968	5.9943	4304.75	0	0
FBgn0024689	0.869871	5.09414	458.039	1.28395e-101	2.84629e-101
FBgn0024698	2.0977	5.25631	2542.94	0	0
FBgn0024728	0.12582	6.44613	8.24	0.00409771	0.00441568
FBgn0024732	2.59101	6.05162	3267.21	0	0
FBgn0024733	0.829295	10.3849	463.887	6.85628e-103	1.52888e-102
FBgn0024734	-0.139639	8.59226	7.45754	0.00631713	0.00678491
FBgn0024740	-3.57858	1.94909	608.443	2.44045e-134	6.39318e-134
FBgn0024754	-0.0243687	5.93344	0.485384	0.485994	0.494837
FBgn0024806	1.18231	6.93291	644.713	3.1553e-142	8.57954e-142
FBgn0024811	0.41762	6.68037	78.6438	7.43814e-19	9.54313e-19
FBgn0024814	0.420316	6.51618	93.8295	3.43903e-22	4.54739e-22
FBgn0024833	0.994319	6.28552	911.473	3.14629e-200	1.12578e-199
FBgn0024836	-1.52509	3.28556	232.279	1.898e-52	3.12707e-52
FBgn0024841	0.654597	5.12287	140.842	1.74234e-32	2.48939e-32
FBgn0024846	0.923635	5.23701	545.021	1.5246e-120	3.71601e-120
FBgn0024887	0.760077	4.54698	302.272	1.05375e-67	1.912e-67
FBgn0024889	1.24636	6.73844	1302.46	3.30767e-285	1.70281e-284
FBgn0024891	0.639067	5.82357	385.502	7.89006e-86	1.58826e-85
FBgn0024909	0.848604	5.25165	308.159	5.49881e-69	1.00507e-68
FBgn0024912	0.991112	2.77197	152.677	4.50671e-35	6.57005e-35
FBgn0024920	3.20965	4.54849	2022.29	0	0
FBgn0024921	1.71777	7.94171	1826.44	0	0
FBgn0024941	-2.11059	3.19055	588.981	4.17466e-130	1.07049e-129
FBgn0024943	-1.99534	5.80913	1851.2	0	0
FBgn0024944	0.37443	3.74508	34.3592	4.58235e-09	5.36262e-09
FBgn0024945	-0.250173	5.15585	35.8576	2.12282e-09	2.49448e-09
FBgn0024947	-0.436609	7.37799	166.986	3.36891e-38	5.01729e-38
FBgn0024956	1.75164	4.62924	1151.22	2.4401e-252	1.09886e-251
FBgn0024957	-0.180693	7.18018	18.0767	2.12185e-05	2.37134e-05
FBgn0024958	0.599723	5.97907	256.729	8.86052e-58	1.5098e-57
FBgn0024963	-2.36719	7.47524	945.187	1.47556e-207	5.4766e-207
FBgn0024973	0.549243	5.7888	150.486	1.35756e-34	1.97302e-34
FBgn0024975	2.37666	4.05572	1912.56	0	0
FBgn0024977	1.26739	1.12459	67.0289	2.67552e-16	3.35265e-16
FBgn0024980	-0.797057	3.81757	153.422	3.09801e-35	4.52477e-35
FBgn0024983	0.914551	5.28123	672.146	3.41098e-148	9.59763e-148
FBgn0024985	-0.120937	6.64889	19.5574	9.76231e-06	1.09607e-05
FBgn0024986	0.0362712	4.92252	0.491857	0.4831	0.492049
FBgn0024987	0.652021	6.04585	183.481	8.42246e-42	1.28553e-41
FBgn0024989	0.37578	2.70006	6.95829	0.00834319	0.00893968
FBgn0024991	1.05935	5.92704	463.171	9.81301e-103	2.18666e-102
FBgn0024992	0.21165	6.24717	35.0458	3.22036e-09	3.77572e-09
FBgn0024993	2.90247	4.4127	1433.97	8.71879750034512e-314	4.95812795916019e-313
FBgn0024994	0.58831	4.90597	138.69	5.14831e-32	7.33909e-32
FBgn0024995	-1.82295	5.20238	832.908	3.7789e-183	1.25305e-182
FBgn0024996	0.848713	5.49955	483.944	2.96201e-107	6.76122e-107
FBgn0024997	-1.02645	4.48029	253.861	3.73885e-57	6.34686e-57
FBgn0024998	1.59571	4.80372	782.742	3.04942e-172	9.60957e-172
FBgn0025109	0.594824	5.13464	241.301	2.04643e-54	3.41384e-54
FBgn0025111	-5.20587	6.29105	7063.62	0	0
FBgn0025117	0.435955	8.16084	245.419	2.58881e-55	4.34701e-55
FBgn0025140	3.48774	6.49169	5594.57	0	0
FBgn0025185	2.62344	3.8467	1822.71	0	0
FBgn0025186	1.45296	6.50692	1651.72	0	0
FBgn0025286	0.912603	9.72737	613.397	2.04101e-135	5.38105e-135
FBgn0025335	1.12437	5.87003	847.12	3.07387e-186	1.03414e-185
FBgn0025336	0.956979	5.13279	336.46	3.76618e-75	7.11907e-75
FBgn0025352	0.509686	7.34951	156.659	6.07697e-36	8.9239e-36
FBgn0025355	1.91771	5.47374	1213.06	8.85696e-266	4.21753e-265
FBgn0025360	-3.6384	3.97972	1443.09	9.08696751121381e-316	5.2019038612253e-315
FBgn0025366	0.761836	7.05768	496.472	5.56609e-110	1.28764e-109
FBgn0025373	0.286348	5.81077	49.8629	1.64874e-12	1.99796e-12
FBgn0025381	-0.0101622	5.7098	0.0430966	0.835543	0.83936
FBgn0025382	-1.17149	1.57665	115.169	7.22659e-27	9.90606e-27
FBgn0025383	-1.01934	-0.45693	19.4814	1.01586e-05	1.14002e-05
FBgn0025390	1.30537	6.80307	87.6267	7.90513e-21	1.0313e-20
FBgn0025391	-1.37308	3.33286	551.775	5.17382e-122	1.27386e-121
FBgn0025393	-0.416253	0.6095	6.49564	0.0108139	0.0115582
FBgn0025394	1.25639	6.49154	1302.72	2.90502e-285	1.49634e-284
FBgn0025454	-1.97606	10.8146	683.434	1.19716e-150	3.40192e-150
FBgn0025455	0.732583	7.89714	518.802	7.71121e-115	1.82907e-114
FBgn0025456	-0.728058	5.75366	283.857	1.08395e-63	1.92181e-63
FBgn0025457	2.39874	5.89488	3656.98	0	0
FBgn0025463	2.2421	6.37796	2280.42	0	0
FBgn0025469	-0.771435	4.34114	282.781	1.86062e-63	3.2945e-63
FBgn0025519	0.911965	4.98687	410.655	2.63971e-91	5.49863e-91
FBgn0025525	-1.50172	5.68807	850.271	6.3496e-187	2.14076e-186
FBgn0025549	1.23763	6.18732	220.21	8.13949e-50	1.31582e-49
FBgn0025558	0.549487	3.17461	48.9779	2.58864e-12	3.12933e-12
FBgn0025571	0.290211	6.69634	65.3146	6.38454e-16	7.97393e-16
FBgn0025574	0.52072	6.52003	163.414	2.03178e-37	3.01215e-37
FBgn0025582	0.485862	7.99006	209.836	1.49155e-47	2.37948e-47
FBgn0025583	-1.3321	6.06521	128.544	8.5337e-30	1.19667e-29
FBgn0025592	-0.315499	6.00083	50.0612	1.49024e-12	1.80705e-12
FBgn0025595	-0.960626	5.5234	311.302	1.13685e-69	2.08639e-69
FBgn0025608	0.231345	7.09809	78.7972	6.88261e-19	8.8328e-19
FBgn0025615	0.596522	4.71741	233.421	1.0696e-52	1.76376e-52
FBgn0025620	-1.07261	6.44441	228.925	1.02287e-51	1.67794e-51
FBgn0025621	1.21075	5.78149	857.86	1.42196e-188	4.83201e-188
FBgn0025624	-0.147034	4.38845	9.11501	0.0025352	0.00274224
FBgn0025625	-1.422	4.80707	862.612	1.31753e-189	4.50466e-189
FBgn0025626	2.35316	6.59284	2816.86	0	0
FBgn0025628	0.325438	7.40709	52.9132	3.48619e-13	4.25406e-13
FBgn0025629	1.46475	4.02414	717.93	3.77312e-158	1.1116e-157
FBgn0025630	0.338046	4.04523	38.7678	4.77335e-10	5.64411e-10
FBgn0025631	-1.54845	5.56488	1426.8	3.15321259825099e-312	1.78562464321313e-311
FBgn0025632	0.0315607	3.15852	0.292847	0.588402	0.596731
FBgn0025633	3.1267	7.62394	4295.78	0	0
FBgn0025634	1.27504	4.70151	724.316	1.54246e-159	4.56703e-159
FBgn0025635	3.52638	5.49035	4550.18	0	0
FBgn0025637	0.95856	6.78984	1170.49	1.58097e-256	7.23329e-256
FBgn0025638	0.637754	6.18387	278.193	1.85977e-62	3.27642e-62
FBgn0025639	1.71546	7.57567	1918.83	0	0
FBgn0025640	0.0478799	5.65545	1.00168	0.316904	0.324979
FBgn0025641	1.06476	7.06001	1002.05	6.42982e-220	2.51164e-219
FBgn0025643	-0.562718	3.8211	49.2613	2.24036e-12	2.71247e-12
FBgn0025674	1.32508	6.00332	1468.9	2.24305803211926e-321	1.31026209277099e-320
FBgn0025676	1.01916	0.891022	41.1411	1.41624e-10	1.68513e-10
FBgn0025678	0.101022	7.06152	4.89854	0.0268794	0.0284785
FBgn0025680	-1.5151	6.25071	630.55	3.79494e-139	1.01928e-138
FBgn0025681	0.432063	7.1047	202.141	7.12212e-46	1.12144e-45
FBgn0025682	-0.296887	6.19961	44.0815	3.14981e-11	3.7687e-11
FBgn0025683	-1.16224	9.4943	1448.69	5.51678146737148e-317	3.17156246786119e-316
FBgn0025684	1.27194	4.96332	733.677	1.42153e-161	4.24619e-161
FBgn0025686	-1.34903	2.93913	231.601	2.66811e-52	4.39205e-52
FBgn0025687	-1.01613	4.57875	78.8993	6.53576e-19	8.3888e-19
FBgn0025692	-0.671917	4.40311	77.0745	1.64626e-18	2.10644e-18
FBgn0025693	-0.24259	5.02075	29.6219	5.25088e-08	6.0669e-08
FBgn0025697	-1.90633	5.87914	1638.62	0	0
FBgn0025700	0.133539	6.97004	10.8195	0.00100438	0.00109454
FBgn0025702	-1.59074	5.9575	1133	2.22528e-248	9.87541e-248
FBgn0025709	0.35412	5.17083	9.52434	0.00202765	0.00219751
FBgn0025712	-2.30886	5.31923	1854.1	0	0
FBgn0025716	2.0032	5.14686	2312.62	0	0
FBgn0025720	0.758595	5.43614	438.46	2.34209e-97	5.06035e-97
FBgn0025724	0.418322	7.06334	191.887	1.23146e-43	1.90355e-43
FBgn0025725	0.224176	7.20278	64.8776	7.9698e-16	9.94595e-16
FBgn0025726	-2.13903	7.55857	551.041	7.47345e-122	1.83766e-121
FBgn0025739	-1.39438	0.924732	105.417	9.89605e-25	1.33524e-24
FBgn0025740	0.939267	7.0686	222.012	3.29186e-50	5.34073e-50
FBgn0025741	1.36912	8.61527	651.8	9.06925e-144	2.48603e-143
FBgn0025742	0.831818	5.50537	459.122	7.46533e-102	1.6561e-101
FBgn0025743	2.20206	6.90652	3570.42	0	0
FBgn0025777	0.68402	6.843	438.624	2.15738e-97	4.66658e-97
FBgn0025781	1.7644	5.44372	1627.38	0	0
FBgn0025790	0.191293	5.69336	28.9053	7.60039e-08	8.76547e-08
FBgn0025800	0.430642	5.60609	95.9925	1.15321e-22	1.53129e-22
FBgn0025802	0.219355	6.19274	35.0394	3.23103e-09	3.78776e-09
FBgn0025806	-0.0667345	5.88882	2.32149	0.127598	0.132618
FBgn0025807	1.53865	3.73689	501.776	3.90476e-111	9.09317e-111
FBgn0025808	2.04039	4.13216	946.052	9.56842e-208	3.55554e-207
FBgn0025809	2.15706	4.55953	1758.95	0	0
FBgn0025814	-0.716458	7.40532	204.81	1.86331e-46	2.95066e-46
FBgn0025815	4.91092	6.36572	7535.43	0	0
FBgn0025820	0.829438	3.57289	266.433	6.79776e-60	1.17525e-59
FBgn0025825	1.55663	4.8287	1342.74	5.82271e-294	3.10577e-293
FBgn0025827	-2.18203	4.49405	1388.48	6.69554e-304	3.69211e-303
FBgn0025830	1.80278	4.97159	1561.16	0	0
FBgn0025832	3.65442	4.99987	3236.58	0	0
FBgn0025833	-2.10041	2.56399	437.809	3.246e-97	7.00374e-97
FBgn0025836	0.409084	7.14471	171.693	3.1587e-39	4.7363e-39
FBgn0025839	-0.504032	6.44506	73.7391	8.91557e-18	1.13204e-17
FBgn0025864	1.04735	7.81201	1007.54	4.12498e-221	1.61867e-220
FBgn0025865	0.681638	6.21259	378.185	3.09047e-84	6.15686e-84
FBgn0025866	0.921741	6.45755	627.748	1.54351e-138	4.13629e-138
FBgn0025874	1.50035	4.04266	967.729	1.85777e-212	7.05295e-212
FBgn0025878	-2.24131	3.36598	882.313	6.86612e-194	2.38899e-193
FBgn0025879	-1.45658	6.17219	1279.4	3.39283e-280	1.7067e-279
FBgn0025885	-0.536039	7.82213	183.051	1.04553e-41	1.59399e-41
FBgn0025936	0.122942	7.4001	7.97494	0.00474292	0.00510805
FBgn0026015	1.73732	6.195	2783.23	0	0
FBgn0026056	0.863874	5.19556	453.701	1.12915e-100	2.48333e-100
FBgn0026059	-0.59799	7.56865	476.62	1.16183e-105	2.63109e-105
FBgn0026060	2.05196	6.22199	3791.77	0	0
FBgn0026061	-1.41051	6.65743	816.535	1.37142e-179	4.47533e-179
FBgn0026064	-3.45231	2.35521	1166.65	1.08113e-255	4.93447e-255
FBgn0026076	0.0883843	6.38265	6.52812	0.0106182	0.0113529
FBgn0026077	-0.165605	4.77021	1.72566	0.188967	0.195307
FBgn0026079	2.40606	5.80485	3765.58	0	0
FBgn0026080	1.39298	5.1343	1165.74	1.69989e-255	7.75114e-255
FBgn0026083	2.13032	8.4784	2239.14	0	0
FBgn0026084	1.61267	8.36753	1542.75	0	0
FBgn0026085	1.74832	3.58936	698.087	7.79427e-154	2.25276e-153
FBgn0026086	-0.591344	7.15	181.961	1.80826e-41	2.75196e-41
FBgn0026088	-0.534909	5.01831	128.729	7.77451e-30	1.09053e-29
FBgn0026089	0.605543	4.33157	111.315	5.04718e-26	6.87769e-26
FBgn0026090	0.177196	4.93059	12.3694	0.000436425	0.000478414
FBgn0026143	3.75807	6.4332	6162.82	0	0
FBgn0026144	5.67781	6.6335	4501.35	0	0
FBgn0026147	-1.11632	8.25775	1184.82	1.2171e-259	5.65609e-259
FBgn0026148	1.5198	3.5596	579.805	4.1357e-128	1.04688e-127
FBgn0026149	2.8223	4.99204	5126.17	0	0
FBgn0026150	1.15869	5.68965	1113.71	3.46606e-244	1.50775e-243
FBgn0026160	-2.68592	7.77901	2588.91	0	0
FBgn0026176	-4.15693	4.90643	3473	0	0
FBgn0026179	-0.506485	7.25789	199.745	2.37454e-45	3.72405e-45
FBgn0026181	1.32222	7.45522	1221.37	1.38063e-267	6.6412e-267
FBgn0026189	-0.983947	7.57279	919.547	5.52943e-202	2.00198e-201
FBgn0026190	-2.4412	1.65294	254.226	3.11318e-57	5.2876e-57
FBgn0026192	1.6523	6.91444	2089.78	0	0
FBgn0026196	3.64202	7.00706	4610.67	0	0
FBgn0026197	-1.87523	6.78398	642.797	8.23258e-142	2.23082e-141
FBgn0026199	-0.259315	6.50492	22.4609	2.14468e-06	2.42726e-06
FBgn0026206	0.979541	7.80276	226.006	4.42973e-51	7.23647e-51
FBgn0026207	0.993858	5.57062	804.254	6.41306e-177	2.07132e-176
FBgn0026239	0.380871	6.64902	99.0945	2.40739e-23	3.21155e-23
FBgn0026250	-0.0711982	8.67835	5.65451	0.0174105	0.0185481
FBgn0026252	2.70912	8.82392	8384.31	0	0
FBgn0026255	-1.87396	4.64205	1012.49	3.45949e-222	1.36717e-221
FBgn0026257	1.95139	5.01716	685.529	4.19362e-151	1.19527e-150
FBgn0026259	-0.430453	8.31668	242.162	1.32864e-54	2.21996e-54
FBgn0026261	1.31623	5.08675	815.26	2.59635e-179	8.46096e-179
FBgn0026262	1.10717	8.08061	449.007	1.18644e-99	2.59605e-99
FBgn0026263	3.37936	5.00665	1624.1	0	0
FBgn0026268	-2.06219	4.64077	1375.47	4.50509e-301	2.44995e-300
FBgn0026309	0.913643	4.80817	410.567	2.7585e-91	5.74228e-91
FBgn0026313	1.12483	6.55439	1112.16	7.51925e-244	3.2664e-243
FBgn0026314	-2.15064	6.37994	865.554	3.02131e-190	1.03524e-189
FBgn0026315	-1.05913	3.45251	170.387	6.0901e-39	9.11298e-39
FBgn0026316	0.0843848	6.68601	8.26783	0.00403538	0.00434901
FBgn0026317	1.43493	6.79947	1439.61	5.19629388909581e-315	2.96568203412545e-314
FBgn0026318	1.3711	4.8788	1060.11	1.54579e-232	6.40601e-232
FBgn0026319	-0.868498	3.1639	146.303	1.11428e-33	1.60735e-33
FBgn0026323	1.34138	6.77499	1622.39	0	0
FBgn0026324	0.385687	4.38696	54.0045	2.00028e-13	2.44813e-13
FBgn0026326	2.0451	5.93084	2693.87	0	0
FBgn0026361	1.11522	3.64438	215.556	8.4301e-49	1.35538e-48
FBgn0026369	0.231224	6.90705	56.1965	6.55771e-14	8.05825e-14
FBgn0026370	-0.117037	8.63084	14.1914	0.000165122	0.000182106
FBgn0026371	0.525146	5.12146	96.4841	8.99625e-23	1.19541e-22
FBgn0026372	0.938407	10.5822	823.353	4.51603e-181	1.4824e-180
FBgn0026373	1.29307	4.36789	403.317	1.04439e-89	2.15133e-89
FBgn0026374	-1.12642	3.66875	236.034	2.88066e-53	4.76934e-53
FBgn0026375	1.52175	7.74106	1974.72	0	0
FBgn0026376	0.794452	5.85935	505.586	5.78867e-112	1.35236e-111
FBgn0026378	1.03925	4.31168	367.71	5.89988e-82	1.16143e-81
[truncated: 7,458 more rows]
