# Supplementary material for: Rapid sex-specific adaptation to high temperature in Drosophila
Source: eLife. 2020 Feb 21;9:e53237. doi: 10.7554/eLife.53237 (PMC7034977; doi:10.7554/eLife.53237)
Supplement: Supplementary file 2. — Results of gene ontology enrichment analysis using topGO among different sets of genes showing distinct expression changes were shown. [file elife-53237-supp2.xlsx]

## Sheet: legend
Supplementary File 2. Gene ontology (GO) enrichment analysis on genes of interest
sheet name	number of genes	evolution contrasts
		female	male
female_up	2503	sig. (FC > 1)	-
female_down	1648	sig. (FC < 1)	-
male_up	1280	-	sig. (FC > 1)
male_down	1086	-	sig. (FC < 1)
concordant_up	469	sig. (FC > 1)	sig. (FC > 1)
concordant_down	291	sig. (FC < 1)	sig. (FC < 1)
female_specific_up	1877	sig. (FC > 1)	n.s.
female_specific_down	1203	sig. (FC < 1)	n.s.
male_specific_up	657	n.s.	sig. (FC > 1)
male_specific_down	638	n.s.	sig. (FC < 1)
antagonistic_f_up_m_dn	157	sig. (FC > 1)	sig. (FC < 1)
antagonistic_f_dn_m_up	154	sig. (FC < 1)	sig. (FC > 1)

## Sheet: female_up
GO.ID	Term	Annotated	Significant	Expected	Rank in Fisher.classic	Fisher.classic	Fisher.weight01
GO:0002181	cytoplasmic translation	105	64	27.89	8	9.8e-14	5.2e-15
GO:0032543	mitochondrial translation	103	62	27.36	9	5.4e-13	8.1e-14
GO:0000398	mRNA splicing, via spliceosome	236	91	62.7	32	2.9e-05	1.7e-05
GO:0006458	'de novo' protein folding	23	11	6.11	111	0.02316	0.00021
GO:0000028	ribosomal small subunit assembly	16	11	4.25	52	0.0005	0.00049
GO:0006418	tRNA aminoacylation for protein translation	42	21	11.16	56	0.00097	0.00109
GO:0043162	ubiquitin-dependent protein catabolic process via the multivesicular body sorting pathway	11	8	2.92	62	0.00182	0.0018
GO:0006414	translational elongation	29	15	7.7	65	0.00335	0.00481
GO:0034504	protein localization to nucleus	65	22	17.27	266	0.1178	0.00493
GO:0006366	transcription by RNA polymerase II	624	155	165.77	1934	0.8566	0.00524
GO:0001682	tRNA 5'-leader removal	8	6	2.13	73	0.00586	0.00581
GO:0000027	ribosomal large subunit assembly	20	11	5.31	77	0.00646	0.00639
GO:0061077	chaperone-mediated protein folding	43	17	11.42	143	0.04323	0.01055
GO:0000460	maturation of 5.8S rRNA	24	13	6.38	66	0.00371	0.01058
GO:0006367	transcription initiation from RNA polymerase II promoter	81	36	21.52	50	0.00037	0.0115
GO:0010951	negative regulation of endopeptidase activity	24	11	6.38	122	0.03273	0.01367
GO:0010499	proteasomal ubiquitin-independent protein catabolic process	14	8	3.72	94	0.01501	0.01487
GO:0042254	ribosome biogenesis	202	95	53.66	16	2.2e-10	0.01622
GO:0006207	'de novo' pyrimidine nucleobase biosynthetic process	7	5	1.86	95	0.01684	0.01674
GO:0006415	translational termination	7	5	1.86	96	0.01684	0.01674
GO:0006508	proteolysis	617	189	163.91	86	0.0105	0.01676
GO:0008150	biological_process	7937	2109	2108.55	942	0.5318	0.01784
GO:0050962	detection of light stimulus involved in sensory perception	12	6	3.19	185	0.07079	0.01863
GO:0006275	regulation of DNA replication	26	5	6.91	1939	0.85951	0.01876
GO:0000447	endonucleolytic cleavage in ITS1 to separate SSU-rRNA from 5.8S rRNA and LSU-rRNA from tricistronic ...	5	4	1.33	103	0.01958	0.01947
GO:0006627	protein processing involved in protein targeting to mitochondrion	5	4	1.33	104	0.01958	0.01947
GO:0015697	quaternary ammonium group transport	5	4	1.33	105	0.01958	0.01947
GO:0016255	attachment of GPI anchor to protein	5	4	1.33	106	0.01958	0.01947
GO:0032222	regulation of synaptic transmission, cholinergic	5	4	1.33	107	0.01958	0.01947
GO:0055065	metal ion homeostasis	98	24	26.03	1390	0.71609	0.01964
GO:0043486	histone exchange	23	11	6.11	112	0.02316	0.02292
GO:0000470	maturation of LSU-rRNA	24	12	6.38	87	0.01186	0.02446
GO:0016567	protein ubiquitination	165	44	43.83	904	0.51839	0.0253
GO:0009070	serine family amino acid biosynthetic process	10	6	2.66	116	0.02648	0.02629
GO:0018230	peptidyl-L-cysteine S-palmitoylation	10	6	2.66	117	0.02648	0.02629
GO:0045752	positive regulation of Toll signaling pathway	10	6	2.66	118	0.02648	0.02629
GO:0006888	ER to Golgi vesicle-mediated transport	64	24	17	136	0.03561	0.03137
GO:0030490	maturation of SSU-rRNA	46	23	12.22	53	0.00056	0.03257
GO:0001178	regulation of transcriptional start site selection at RNA polymerase II promoter	8	5	2.13	130	0.03515	0.03494
GO:0001731	formation of translation preinitiation complex	8	5	2.13	131	0.03515	0.03494
GO:0009642	response to light intensity	8	5	2.13	132	0.03515	0.03494
GO:0000278	mitotic cell cycle	430	112	114.23	1190	0.61782	0.0357
GO:0007370	ventral furrow formation	16	8	4.25	137	0.03823	0.03793
GO:0009617	response to bacterium	184	50	48.88	781	0.45348	0.03819
GO:0006518	peptide metabolic process	517	214	137.35	4	2.7e-14	0.04038
GO:0000462	maturation of SSU-rRNA from tricistronic rRNA transcript (SSU-rRNA, 5.8S rRNA, LSU-rRNA)	33	16	8.77	72	0.00565	0.04452
GO:0006626	protein targeting to mitochondrion	29	14	7.7	85	0.00987	0.04475
GO:0006122	mitochondrial electron transport, ubiquinol to cytochrome c	11	6	2.92	144	0.04536	0.04506
GO:0006767	water-soluble vitamin metabolic process	12	7	3.19	108	0.01993	0.04607
GO:0006479	protein methylation	71	22	18.86	452	0.23513	0.04612
GO:0006336	DNA replication-independent nucleosome assembly	6	4	1.59	146	0.04641	0.04618
GO:0007221	positive regulation of transcription of Notch receptor target	6	4	1.59	147	0.04641	0.04618
GO:0034551	mitochondrial respiratory chain complex III assembly	6	4	1.59	148	0.04641	0.04618
GO:0040031	snRNA modification	6	4	1.59	149	0.04641	0.04618
GO:0051294	establishment of spindle orientation	23	8	6.11	462	0.24912	0.04622
GO:0000381	regulation of alternative mRNA splicing, via spliceosome	79	28	20.99	151	0.05067	0.04985
GO:0006783	heme biosynthetic process	14	7	3.72	154	0.05184	0.05147
GO:0042273	ribosomal large subunit biogenesis	59	30	15.67	41	5.7e-05	0.05387
GO:0000387	spliceosomal snRNP assembly	20	9	5.31	165	0.05811	0.05764
GO:0000469	cleavage involved in rRNA processing	19	10	5.05	90	0.0138	0.05954
GO:0009220	pyrimidine ribonucleotide biosynthetic process	9	5	2.39	169	0.06205	0.05972
GO:0018991	oviposition	16	6	4.25	444	0.23291	0.05979
GO:0000002	mitochondrial genome maintenance	10	4	2.66	470	0.26169	0.05982
GO:0051100	negative regulation of binding	10	4	2.66	471	0.26169	0.05982
GO:0000018	regulation of DNA recombination	15	5	3.98	612	0.3661	0.05984
GO:0098754	detoxification	27	7	7.17	1168	0.60286	0.05994
GO:1901615	organic hydroxy compound metabolic process	133	33	35.33	1359	0.70893	0.06011
GO:0019438	aromatic compound biosynthetic process	1254	322	333.14	1674	0.79088	0.06094
GO:0006465	signal peptide processing	9	5	2.39	170	0.06205	0.06171
GO:0007095	mitotic G2 DNA damage checkpoint	9	5	2.39	171	0.06205	0.06171
GO:0033363	secretory granule organization	9	5	2.39	172	0.06205	0.06171
GO:2001235	positive regulation of apoptotic signaling pathway	9	5	2.39	173	0.06205	0.06171
GO:0043280	positive regulation of cysteine-type endopeptidase activity involved in apoptotic process	20	6	5.31	770	0.44661	0.06193
GO:0043085	positive regulation of catalytic activity	186	40	49.41	2580	0.95454	0.06311
GO:0009620	response to fungus	58	20	15.41	261	0.11276	0.0701
GO:0010972	negative regulation of G2/M transition of mitotic cell cycle	17	9	4.52	101	0.01845	0.07015
GO:0006403	RNA localization	172	50	45.69	464	0.25095	0.07015
GO:0031126	snoRNA 3'-end processing	7	5	1.86	97	0.01684	0.07024
GO:0002793	positive regulation of peptide secretion	15	6	3.98	366	0.18476	0.07031
GO:0006534	cysteine metabolic process	9	4	2.39	407	0.19607	0.07034
GO:0071480	cellular response to gamma radiation	12	6	3.19	186	0.07079	0.07036
GO:0006277	DNA amplification	19	6	5.05	634	0.39234	0.07038
GO:2000045	regulation of G1/S transition of mitotic cell cycle	22	6	5.84	973	0.55097	0.07044
GO:0031056	regulation of histone modification	46	12	12.22	1020	0.58547	0.07046
GO:1903047	mitotic cell cycle process	294	77	78.1	1017	0.58179	0.07052
GO:0051348	negative regulation of transferase activity	30	5	7.97	2353	0.93111	0.07065
GO:0006952	defense response	326	87	86.61	833	0.50171	0.0707
GO:0023061	signal release	125	27	33.21	2272	0.91694	0.07087
GO:0098655	cation transmembrane transport	149	29	39.58	2897	0.98346	0.07233
GO:0006457	protein folding	116	42	30.82	89	0.01363	0.07325
GO:0019222	regulation of metabolic process	1788	442	475	2836	0.97963	0.07328
GO:0008283	cell proliferation	323	65	85.81	3214	0.99753	0.07379
GO:0006413	translational initiation	57	21	15.14	162	0.05677	0.07457
GO:0048729	tissue morphogenesis	556	85	147.71	3601	1	0.07501
GO:0006839	mitochondrial transport	77	34	20.46	54	0.00061	0.0754
GO:0030488	tRNA methylation	18	8	4.78	199	0.07778	0.07722
GO:0000413	protein peptidyl-prolyl isomerization	21	9	5.58	202	0.07849	0.07788
GO:0008033	tRNA processing	76	34	20.19	51	0.00046	0.08391
GO:0006398	mRNA 3'-end processing by stem-loop binding and cleavage	7	4	1.86	205	0.08583	0.08544
GO:0006541	glutamine metabolic process	7	4	1.86	206	0.08583	0.08544
GO:0007503	fat body development	7	4	1.86	207	0.08583	0.08544
GO:0009130	pyrimidine nucleoside monophosphate biosynthetic process	7	4	1.86	208	0.08583	0.08544
GO:0031118	rRNA pseudouridine synthesis	7	4	1.86	209	0.08583	0.08544
GO:0060179	male mating behavior	56	7	14.88	3187	0.99686	0.08675
GO:0002065	columnar/cuboidal epithelial cell differentiation	281	46	74.65	3472	0.99999	0.08964
GO:0010212	response to ionizing radiation	38	15	10.1	158	0.05637	0.09669
GO:0006310	DNA recombination	78	25	20.72	351	0.16479	0.09679
GO:0006999	nuclear pore organization	10	5	2.66	224	0.09763	0.09712
GO:0008090	retrograde axonal transport	10	5	2.66	225	0.09763	0.09712
GO:0034314	Arp2/3 complex-mediated actin nucleation	15	6	3.98	367	0.18476	0.09718
GO:0000956	nuclear-transcribed mRNA catabolic process	57	16	15.14	776	0.4481	0.09737
GO:0007018	microtubule-based movement	103	23	27.36	1952	0.86347	0.09909
GO:1990542	mitochondrial transmembrane transport	35	13	9.3	258	0.11183	0.10178
GO:0007601	visual perception	22	9	5.84	233	0.10267	0.10211
GO:0007220	Notch receptor processing	13	6	3.45	238	0.10282	0.10223
GO:0016575	histone deacetylation	13	6	3.45	239	0.10282	0.10223
GO:0034389	lipid particle organization	13	6	3.45	240	0.10282	0.10223
GO:0034614	cellular response to reactive oxygen species	13	6	3.45	241	0.10282	0.10223
GO:0006612	protein targeting to membrane	30	13	7.97	129	0.0346	0.10298
GO:0006379	mRNA cleavage	19	8	5.05	246	0.10419	0.10348
GO:0045167	asymmetric protein localization involved in cell fate determination	19	8	5.05	247	0.10419	0.10348
GO:0006727	ommochrome biosynthetic process	16	7	4.25	250	0.10451	0.10385
GO:0006081	cellular aldehyde metabolic process	24	9	6.38	346	0.16205	0.10388
GO:0006955	immune response	270	60	71.73	2611	0.95875	0.10513
GO:0043161	proteasome-mediated ubiquitin-dependent protein catabolic process	171	43	45.43	1343	0.69236	0.10918
GO:0043604	amide biosynthetic process	462	198	122.74	3	4.4e-15	0.10926
GO:0010033	response to organic substance	446	84	118.48	3455	0.99997	0.11264
GO:0016573	histone acetylation	74	25	19.66	231	0.10214	0.1149
GO:0009267	cellular response to starvation	63	19	16.74	549	0.30118	0.11631
GO:0006575	cellular modified amino acid metabolic process	68	25	18.06	141	0.04115	0.11946
GO:0000054	ribosomal subunit export from nucleus	12	6	3.19	187	0.07079	0.12006
GO:0031125	rRNA 3'-end processing	10	5	2.66	226	0.09763	0.12012
GO:0000393	spliceosomal conformational changes to generate catalytic conformation	5	3	1.33	267	0.12065	0.12022
GO:0006183	GTP biosynthetic process	5	3	1.33	268	0.12065	0.12022
GO:0006551	leucine metabolic process	5	3	1.33	269	0.12065	0.12022
GO:0006568	tryptophan metabolic process	5	3	1.33	270	0.12065	0.12022
GO:0006751	glutathione catabolic process	5	3	1.33	271	0.12065	0.12022
GO:0007004	telomere maintenance via telomerase	5	3	1.33	272	0.12065	0.12022
GO:0007589	body fluid secretion	5	3	1.33	273	0.12065	0.12022
GO:0008616	queuosine biosynthetic process	5	3	1.33	274	0.12065	0.12022
GO:0016559	peroxisome fission	5	3	1.33	275	0.12065	0.12022
GO:0023058	adaptation of signaling pathway	5	3	1.33	276	0.12065	0.12022
GO:0031468	nuclear envelope reassembly	5	3	1.33	277	0.12065	0.12022
GO:0032780	negative regulation of ATPase activity	5	3	1.33	278	0.12065	0.12022
GO:0032837	distributive segregation	5	3	1.33	279	0.12065	0.12022
GO:0046887	positive regulation of hormone secretion	5	3	1.33	280	0.12065	0.12022
GO:0051013	microtubule severing	5	3	1.33	281	0.12065	0.12022
GO:0071051	polyadenylation-dependent snoRNA 3'-end processing	5	3	1.33	282	0.12065	0.12022
GO:0072595	maintenance of protein localization in organelle	5	3	1.33	283	0.12065	0.12022
GO:0090435	protein localization to nuclear envelope	5	3	1.33	284	0.12065	0.12022
GO:0090646	mitochondrial tRNA processing	5	3	1.33	285	0.12065	0.12022
GO:0097191	extrinsic apoptotic signaling pathway	5	3	1.33	286	0.12065	0.12022
GO:2001022	positive regulation of response to DNA damage stimulus	5	3	1.33	287	0.12065	0.12022
GO:0072666	establishment of protein localization to vacuole	17	6	4.52	531	0.28436	0.12025
GO:0090276	regulation of peptide hormone secretion	11	4	2.92	567	0.33055	0.1203
GO:0006165	nucleoside diphosphate phosphorylation	24	6	6.38	1210	0.64533	0.12051
GO:0034243	regulation of transcription elongation from RNA polymerase II promoter	21	5	5.58	1344	0.69251	0.12054
GO:0032787	monocarboxylic acid metabolic process	133	29	35.33	2190	0.91421	0.12138
GO:0034249	negative regulation of cellular amide metabolic process	80	12	21.25	3137	0.99557	0.1218
GO:0000724	double-strand break repair via homologous recombination	39	14	10.36	298	0.1282	0.12486
GO:0043065	positive regulation of apoptotic process	55	18	14.61	373	0.18664	0.12953
GO:0006270	DNA replication initiation	23	9	6.11	303	0.1306	0.12969
GO:0006261	DNA-dependent DNA replication	83	29	22.05	159	0.05638	0.13494
GO:0001111	promoter clearance from RNA polymerase II promoter	8	4	2.13	311	0.1365	0.13593
GO:0001113	transcriptional open complex formation at RNA polymerase II promoter	8	4	2.13	312	0.1365	0.13593
GO:0006488	dolichol-linked oligosaccharide biosynthetic process	8	4	2.13	313	0.1365	0.13593
GO:0006525	arginine metabolic process	8	4	2.13	314	0.1365	0.13593
GO:0006688	glycosphingolipid biosynthetic process	8	4	2.13	315	0.1365	0.13593
GO:0008637	apoptotic mitochondrial changes	8	4	2.13	316	0.1365	0.13593
GO:0033314	mitotic DNA replication checkpoint	8	4	2.13	317	0.1365	0.13593
GO:0034508	centromere complex assembly	8	4	2.13	318	0.1365	0.13593
GO:0045899	positive regulation of RNA polymerase II transcriptional preinitiation complex assembly	8	4	2.13	319	0.1365	0.13593
GO:0061028	establishment of endothelial barrier	8	4	2.13	320	0.1365	0.13593
GO:0033962	cytoplasmic mRNA processing body assembly	14	5	3.72	552	0.30565	0.13604
GO:0006520	cellular amino acid metabolic process	153	58	40.65	58	0.00127	0.13699
GO:0006260	DNA replication	99	35	26.3	124	0.03283	0.13898
GO:0071482	cellular response to light stimulus	43	19	11.42	83	0.00931	0.13926
GO:0007098	centrosome cycle	69	13	18.33	2498	0.94915	0.13992
GO:0006357	regulation of transcription by RNA polymerase II	587	140	155.94	2488	0.94601	0.14008
GO:0016572	histone phosphorylation	14	6	3.72	330	0.14106	0.1403
GO:0032465	regulation of cytokinesis	11	5	2.92	337	0.14119	0.14051
GO:0045116	protein neddylation	11	5	2.92	338	0.14119	0.14051
GO:0048542	lymph gland development	54	13	14.35	1360	0.71005	0.14128
GO:0000070	mitotic sister chromatid segregation	98	20	26.03	2378	0.93702	0.14243
GO:0006796	phosphate-containing compound metabolic process	862	202	229	2979	0.98832	0.14788
GO:0006364	rRNA processing	133	60	35.33	28	2.7e-06	0.15703
GO:0006897	endocytosis	191	39	50.74	2852	0.981	0.15709
GO:0007005	mitochondrion organization	166	53	44.1	184	0.06978	0.15869
GO:0051346	negative regulation of hydrolase activity	41	19	10.89	71	0.00499	0.17273
GO:0000154	rRNA modification	25	12	6.64	99	0.01739	0.17314
GO:0018208	peptidyl-proline modification	24	11	6.38	123	0.03273	0.17325
GO:0010952	positive regulation of peptidase activity	27	9	7.17	487	0.27391	0.17366
GO:0008053	mitochondrial fusion	9	4	2.39	408	0.19607	0.17369
GO:0098876	vesicle-mediated transport to the plasma membrane	26	8	6.91	627	0.38384	0.17377
GO:0009409	response to cold	11	4	2.92	568	0.33055	0.17377
GO:0046503	glycerolipid catabolic process	11	4	2.92	569	0.33055	0.17377
GO:0018410	C-terminal protein amino acid modification	8	3	2.13	590	0.3608	0.1738
GO:0019941	modification-dependent protein catabolic process	223	60	59.24	805	0.47968	0.17381
GO:0048015	phosphatidylinositol-mediated signaling	11	3	2.92	1032	0.59234	0.17392
GO:0007006	mitochondrial membrane organization	23	6	6.11	1160	0.59965	0.17394
GO:1901617	organic hydroxy compound biosynthetic process	48	12	12.75	1233	0.65104	0.17404
GO:0072525	pyridine-containing compound biosynthetic process	28	6	7.44	1675	0.79378	0.17414
GO:0044242	cellular lipid catabolic process	74	18	19.66	1362	0.71107	0.17417
GO:0019725	cellular homeostasis	201	41	53.4	2898	0.98354	0.1758
GO:0006606	protein import into nucleus	59	17	15.67	640	0.39528	0.176
GO:0031399	regulation of protein modification process	311	69	82.62	2706	0.96959	0.17601
GO:0042332	gravitaxis	23	9	6.11	304	0.1306	0.17608
GO:0043248	proteasome assembly	18	7	4.78	360	0.17729	0.1763
GO:0050767	regulation of neurogenesis	189	27	50.21	3470	0.99999	0.17743
GO:0032774	RNA biosynthetic process	1034	253	274.69	2538	0.95387	0.17757
GO:0007444	imaginal disc development	516	79	137.08	3592	1	0.17827
GO:0034472	snRNA 3'-end processing	22	9	5.84	234	0.10267	0.18348
GO:0006730	one-carbon metabolic process	15	6	3.98	368	0.18476	0.18383
GO:0045454	cell redox homeostasis	28	10	7.44	371	0.18634	0.18508
GO:0006820	anion transport	177	35	47.02	2923	0.98647	0.18827
GO:0006383	transcription by RNA polymerase III	18	8	4.78	200	0.07778	0.19021
GO:0016233	telomere capping	12	5	3.19	377	0.19147	0.19061
GO:0031440	regulation of mRNA 3'-end processing	12	5	3.19	378	0.19147	0.19061
GO:0001578	microtubule bundle formation	34	6	9.03	2306	0.92079	0.192
GO:0006206	pyrimidine nucleobase metabolic process	13	8	3.45	80	0.00836	0.1936
GO:0006282	regulation of DNA repair	15	7	3.98	192	0.07551	0.19392
GO:0034644	cellular response to UV	11	5	2.92	339	0.14119	0.19412
GO:0006303	double-strand break repair via nonhomologous end joining	6	3	1.59	385	0.19489	0.19426
GO:0006384	transcription initiation from RNA polymerase III promoter	6	3	1.59	386	0.19489	0.19426
GO:0007311	maternal specification of dorsal/ventral axis, oocyte, germ-line encoded	6	3	1.59	387	0.19489	0.19426
GO:0009083	branched-chain amino acid catabolic process	6	3	1.59	388	0.19489	0.19426
GO:0009608	response to symbiont	6	3	1.59	389	0.19489	0.19426
GO:0016078	tRNA catabolic process	6	3	1.59	390	0.19489	0.19426
GO:0018344	protein geranylgeranylation	6	3	1.59	391	0.19489	0.19426
GO:0032511	late endosome to vacuole transport via multivesicular body sorting pathway	6	3	1.59	392	0.19489	0.19426
GO:0032785	negative regulation of DNA-templated transcription, elongation	6	3	1.59	393	0.19489	0.19426
GO:0042364	water-soluble vitamin biosynthetic process	6	3	1.59	394	0.19489	0.19426
GO:0043393	regulation of protein binding	6	3	1.59	395	0.19489	0.19426
GO:0045835	negative regulation of meiotic nuclear division	6	3	1.59	396	0.19489	0.19426
GO:0051781	positive regulation of cell division	6	3	1.59	397	0.19489	0.19426
GO:0090141	positive regulation of mitochondrial fission	6	3	1.59	398	0.19489	0.19426
GO:1900182	positive regulation of protein localization to nucleus	6	3	1.59	399	0.19489	0.19426
GO:1903146	regulation of autophagy of mitochondrion	6	3	1.59	400	0.19489	0.19426
GO:0007620	copulation	12	4	3.19	645	0.4001	0.19438
GO:0006401	RNA catabolic process	86	23	22.85	938	0.52642	0.19452
GO:0006066	alcohol metabolic process	60	13	15.94	1897	0.84382	0.19518
GO:0000463	maturation of LSU-rRNA from tricistronic rRNA transcript (SSU-rRNA, 5.8S rRNA, LSU-rRNA)	9	4	2.39	409	0.19607	0.19531
GO:0006614	SRP-dependent cotranslational protein targeting to membrane	9	4	2.39	410	0.19607	0.19531
GO:0019221	cytokine-mediated signaling pathway	9	4	2.39	411	0.19607	0.19531
GO:0031573	intra-S DNA damage checkpoint	9	4	2.39	412	0.19607	0.19531
GO:0046653	tetrahydrofolate metabolic process	9	4	2.39	413	0.19607	0.19531
GO:0071028	nuclear mRNA surveillance	9	4	2.39	414	0.19607	0.19531
GO:2000779	regulation of double-strand break repair	9	4	2.39	415	0.19607	0.19531
GO:0051028	mRNA transport	43	13	11.42	584	0.34631	0.19531
GO:0017145	stem cell division	91	20	24.18	1981	0.86896	0.19544
GO:0072657	protein localization to membrane	101	27	26.83	936	0.52307	0.19567
GO:0009611	response to wounding	109	15	28.96	3359	0.99962	0.19931
GO:0006915	apoptotic process	257	59	68.27	2313	0.92141	0.20038
GO:0016049	cell growth	145	17	38.52	3494	1	0.20129
GO:0009312	oligosaccharide biosynthetic process	19	7	5.05	432	0.21993	0.21878
GO:0050830	defense response to Gram-positive bacterium	29	10	7.7	436	0.2206	0.21919
GO:0045747	positive regulation of Notch signaling pathway	36	12	9.56	441	0.22796	0.22636
GO:0006487	protein N-linked glycosylation	33	13	8.77	190	0.07393	0.23091
GO:0016059	deactivation of rhodopsin mediated signaling	16	6	4.25	445	0.23291	0.23182
GO:0046427	positive regulation of JAK-STAT cascade	16	6	4.25	446	0.23291	0.23182
GO:0044237	cellular metabolic process	4137	1215	1099.04	18	2.1e-09	0.23618
GO:0018205	peptidyl-lysine modification	133	42	35.33	260	0.11224	0.24406
GO:0007010	cytoskeleton organization	543	113	144.25	3343	0.99946	0.24475
GO:0051604	protein maturation	81	26	21.52	345	0.15695	0.24483
GO:0000245	spliceosomal complex assembly	22	6	5.84	974	0.55097	0.24632
GO:0009166	nucleotide catabolic process	32	8	8.5	1218	0.64565	0.24654
GO:0010468	regulation of gene expression	1302	318	345.89	2765	0.97492	0.24915
GO:0017144	drug metabolic process	301	75	79.96	1522	0.76494	0.25923
GO:0009116	nucleoside metabolic process	50	16	13.28	451	0.23452	0.26033
GO:0008299	isoprenoid biosynthetic process	17	6	4.52	532	0.28436	0.26072
GO:0048072	compound eye pigmentation	17	6	4.52	533	0.28436	0.26072
GO:0006309	apoptotic DNA fragmentation	10	4	2.66	472	0.26169	0.26076
GO:0045292	mRNA cis splicing, via spliceosome	10	4	2.66	473	0.26169	0.26076
GO:0045737	positive regulation of cyclin-dependent protein serine/threonine kinase activity	10	4	2.66	474	0.26169	0.26076
GO:0072697	protein localization to cell cortex	10	4	2.66	475	0.26169	0.26076
GO:0072347	response to anesthetic	22	5	5.84	1403	0.73414	0.26144
GO:0046907	intracellular transport	593	156	157.54	1006	0.57559	0.26165
GO:0018130	heterocycle biosynthetic process	1260	326	334.73	1456	0.73882	0.26429
GO:0072528	pyrimidine-containing compound biosynthetic process	23	12	6.11	79	0.00778	0.26463
GO:0010466	negative regulation of peptidase activity	25	12	6.64	100	0.01739	0.2647
GO:0034471	ncRNA 5'-end processing	9	7	2.39	63	0.00197	0.26479
GO:0033013	tetrapyrrole metabolic process	16	8	4.25	138	0.03823	0.2649
GO:0071428	rRNA-containing ribonucleoprotein complex export from nucleus	13	7	3.45	126	0.03342	0.26493
GO:0046467	membrane lipid biosynthetic process	66	21	17.53	425	0.20133	0.26493
GO:0034982	mitochondrial protein processing	6	5	1.59	76	0.00616	0.26495
GO:0006664	glycolipid metabolic process	53	17	14.08	437	0.22204	0.265
GO:0061448	connective tissue development	8	5	2.13	133	0.03515	0.26501
GO:0022400	regulation of rhodopsin mediated signaling pathway	17	7	4.52	328	0.13859	0.26506
GO:1901606	alpha-amino acid catabolic process	37	10	9.83	960	0.5373	0.26507
GO:0098732	macromolecule deacylation	18	7	4.78	361	0.17729	0.2651
GO:0018342	protein prenylation	7	4	1.86	210	0.08583	0.26511
GO:0009914	hormone transport	15	6	3.98	369	0.18476	0.26512
GO:0090306	spindle assembly involved in meiosis	19	7	5.05	433	0.21993	0.26513
GO:0045297	post-mating behavior	8	4	2.13	321	0.1365	0.26514
GO:0030072	peptide hormone secretion	12	5	3.19	379	0.19147	0.26515
GO:0002097	tRNA wobble base modification	13	5	3.45	457	0.24687	0.26518
GO:0001101	response to acid chemical	17	6	4.52	534	0.28436	0.26519
GO:0035303	regulation of dephosphorylation	17	6	4.52	535	0.28436	0.26519
GO:0006356	regulation of transcription by RNA polymerase I	6	3	1.59	401	0.19489	0.2652
GO:0009589	detection of UV	6	3	1.59	402	0.19489	0.2652
GO:0048199	vesicle targeting, to, from or within Golgi	6	3	1.59	403	0.19489	0.2652
GO:0006313	transposition, DNA-mediated	7	3	1.86	491	0.27669	0.26523
GO:0006448	regulation of translational elongation	7	3	1.86	492	0.27669	0.26523
GO:0009147	pyrimidine nucleoside triphosphate metabolic process	7	3	1.86	493	0.27669	0.26523
GO:0034030	ribonucleoside bisphosphate biosynthetic process	7	3	1.86	494	0.27669	0.26523
GO:0034033	purine nucleoside bisphosphate biosynthetic process	7	3	1.86	495	0.27669	0.26523
GO:0098781	ncRNA transcription	12	4	3.19	646	0.4001	0.26527
GO:0006555	methionine metabolic process	16	5	4.25	734	0.42664	0.26528
GO:0006677	glycosylceramide metabolic process	6	2	1.59	836	0.50286	0.26532
GO:0007492	endoderm development	6	2	1.59	837	0.50286	0.26532
GO:0046685	response to arsenic-containing substance	6	2	1.59	838	0.50286	0.26532
GO:0009141	nucleoside triphosphate metabolic process	123	33	32.68	898	0.50822	0.26533
GO:0000097	sulfur amino acid biosynthetic process	10	3	2.66	905	0.52094	0.26533
GO:1901135	carbohydrate derivative metabolic process	500	133	132.83	899	0.51092	0.26533
GO:0006031	chitin biosynthetic process	7	2	1.86	1060	0.59332	0.26536
GO:0071265	L-methionine biosynthetic process	7	2	1.86	1061	0.59332	0.26536
GO:0030166	proteoglycan biosynthetic process	19	5	5.05	1146	0.59661	0.26538
GO:0006346	methylation-dependent chromatin silencing	8	2	2.13	1274	0.67083	0.26539
GO:0008205	ecdysone metabolic process	9	2	2.39	1418	0.73588	0.26542
GO:0005984	disaccharide metabolic process	10	2	2.66	1645	0.78961	0.26546
GO:0002808	regulation of antibacterial peptide biosynthetic process	18	4	4.78	1461	0.74513	0.26547
GO:1902742	apoptotic process involved in development	22	5	5.84	1404	0.73414	0.26548
GO:0055057	neuroblast division	41	10	10.89	1314	0.68131	0.26549
GO:0051272	positive regulation of cellular component movement	16	3	4.25	1779	0.83942	0.26553
GO:2001251	negative regulation of chromosome organization	40	9	10.63	1533	0.77356	0.26558
GO:0034754	cellular hormone metabolic process	33	7	8.77	1703	0.81299	0.2656
GO:0042326	negative regulation of phosphorylation	67	16	17.8	1402	0.73413	0.2656
GO:0031577	spindle checkpoint	15	2	3.98	2379	0.93759	0.26563
GO:0010454	negative regulation of cell fate commitment	19	3	5.05	2191	0.91459	0.26563
GO:0051053	negative regulation of DNA metabolic process	23	4	6.11	2135	0.89635	0.26564
GO:0042337	cuticle development involved in chitin-based cuticle molting cycle	24	4	6.38	2202	0.91468	0.26567
GO:0072503	cellular divalent inorganic cation homeostasis	52	11	13.81	1926	0.85252	0.26573
GO:0008202	steroid metabolic process	42	8	11.16	2172	0.90383	0.26577
GO:0061136	regulation of proteasomal protein catabolic process	27	4	7.17	2528	0.95353	0.26577
GO:0010976	positive regulation of neuron projection development	30	4	7.97	2771	0.97545	0.26588
GO:0051223	regulation of protein transport	53	10	14.08	2327	0.92798	0.26589
GO:0045859	regulation of protein kinase activity	88	17	23.38	2597	0.95634	0.26618
GO:0060033	anatomical structure regression	59	9	15.67	2958	0.98717	0.26622
GO:1901652	response to peptide	52	7	13.81	3087	0.99295	0.26624
GO:0051648	vesicle localization	99	17	26.3	3004	0.9902	0.26656
GO:0051962	positive regulation of nervous system development	96	14	25.5	3257	0.99844	0.26684
GO:0010647	positive regulation of cell communication	334	77	88.73	2454	0.94085	0.2669
GO:0023056	positive regulation of signaling	334	77	88.73	2455	0.94085	0.2669
GO:0071495	cellular response to endogenous stimulus	179	31	47.55	3284	0.99881	0.2675
GO:0042592	homeostatic process	405	85	107.59	3183	0.99677	0.26835
GO:0060284	regulation of cell development	242	36	64.29	3492	1	0.26904
GO:0002066	columnar/cuboidal epithelial cell development	274	42	72.79	3502	1	0.26938
GO:0031324	negative regulation of cellular metabolic process	548	112	145.58	3395	0.99977	0.26989
GO:0009892	negative regulation of metabolic process	672	145	178.52	3325	0.99922	0.26995
GO:0048870	cell motility	303	44	80.5	3532	1	0.27014
GO:0043043	peptide biosynthetic process	443	189	117.69	5	3.3e-14	0.27167
GO:0006378	mRNA polyadenylation	27	9	7.17	488	0.27391	0.27239
GO:0009791	post-embryonic development	553	89	146.91	3578	1	0.27318
GO:0035295	tube development	643	107	170.82	3586	1	0.27408
GO:0048518	positive regulation of biological process	1254	269	333.14	3500	1	0.2749
GO:0006497	protein lipidation	55	18	14.61	374	0.18664	0.27526
GO:0031398	positive regulation of protein ubiquitination	14	5	3.72	553	0.30565	0.27584
GO:0061355	Wnt protein secretion	14	5	3.72	554	0.30565	0.27584
GO:0000055	ribosomal large subunit export from nucleus	7	3	1.86	496	0.27669	0.27588
GO:0006121	mitochondrial electron transport, succinate to ubiquinone	7	3	1.86	497	0.27669	0.27588
GO:0006272	leading strand elongation	7	3	1.86	498	0.27669	0.27588
GO:0006312	mitotic recombination	7	3	1.86	499	0.27669	0.27588
GO:0006348	chromatin silencing at telomere	7	3	1.86	500	0.27669	0.27588
GO:0006353	DNA-templated transcription, termination	7	3	1.86	501	0.27669	0.27588
GO:0006388	tRNA splicing, via endonucleolytic cleavage and ligation	7	3	1.86	502	0.27669	0.27588
GO:0006570	tyrosine metabolic process	7	3	1.86	503	0.27669	0.27588
GO:0009074	aromatic amino acid family catabolic process	7	3	1.86	504	0.27669	0.27588
GO:0009396	folic acid-containing compound biosynthetic process	7	3	1.86	505	0.27669	0.27588
GO:0018065	protein-cofactor linkage	7	3	1.86	506	0.27669	0.27588
GO:0034126	positive regulation of MyD88-dependent toll-like receptor signaling pathway	7	3	1.86	507	0.27669	0.27588
GO:0034475	U4 snRNA 3'-end processing	7	3	1.86	508	0.27669	0.27588
GO:0035007	regulation of melanization defense response	7	3	1.86	509	0.27669	0.27588
GO:0036065	fucosylation	7	3	1.86	510	0.27669	0.27588
GO:0042438	melanin biosynthetic process	7	3	1.86	511	0.27669	0.27588
GO:0045199	maintenance of epithelial cell apical/basal polarity	7	3	1.86	512	0.27669	0.27588
GO:0046513	ceramide biosynthetic process	7	3	1.86	513	0.27669	0.27588
GO:0048042	regulation of post-mating oviposition	7	3	1.86	514	0.27669	0.27588
GO:0055083	monovalent inorganic anion homeostasis	7	3	1.86	515	0.27669	0.27588
GO:0070475	rRNA base methylation	7	3	1.86	516	0.27669	0.27588
GO:0072529	pyrimidine-containing compound catabolic process	7	3	1.86	517	0.27669	0.27588
GO:1901409	positive regulation of phosphorylation of RNA polymerase II C-terminal domain	7	3	1.86	518	0.27669	0.27588
GO:0048260	positive regulation of receptor-mediated endocytosis	13	4	3.45	793	0.4682	0.27604
GO:0046839	phospholipid dephosphorylation	18	5	4.78	962	0.54286	0.27613
GO:0007338	single fertilization	26	7	6.91	989	0.55808	0.27616
GO:0006650	glycerophospholipid metabolic process	84	22	22.32	1005	0.57296	0.27627
GO:0048519	negative regulation of biological process	1211	246	321.71	3550	1	0.27656
GO:0046034	ATP metabolic process	111	28	29.49	1272	0.66147	0.27659
GO:0007600	sensory perception	251	63	66.68	1395	0.72583	0.2772
GO:0042749	regulation of circadian sleep/wake cycle	38	5	10.1	2919	0.98598	0.27757
GO:0046854	phosphatidylinositol phosphorylation	17	6	4.52	536	0.28436	0.28312
GO:0006605	protein targeting	85	34	22.58	69	0.00461	0.28544
GO:0001510	RNA methylation	42	16	11.16	182	0.06769	0.28688
GO:0006726	eye pigment biosynthetic process	35	13	9.3	259	0.11183	0.28713
GO:0042430	indole-containing compound metabolic process	9	5	2.39	174	0.06205	0.28737
GO:0043687	post-translational protein modification	12	5	3.19	380	0.19147	0.28754
GO:0051262	protein tetramerization	9	4	2.39	416	0.19607	0.28759
GO:0006333	chromatin assembly or disassembly	47	14	12.49	589	0.36012	0.2876
GO:0046113	nucleobase catabolic process	10	4	2.66	476	0.26169	0.28764
GO:0006301	postreplication repair	11	4	2.92	570	0.33055	0.2877
GO:0046394	carboxylic acid biosynthetic process	103	28	27.36	808	0.4809	0.28779
GO:0007562	eclosion	17	5	4.52	810	0.48592	0.28783
GO:0030497	fatty acid elongation	17	5	4.52	811	0.48592	0.28783
GO:0030237	female sex determination	14	4	3.72	943	0.53322	0.28787
GO:0016556	mRNA modification	11	3	2.92	1033	0.59234	0.28792
GO:0033619	membrane protein proteolysis	12	3	3.19	1237	0.65642	0.28797
GO:0051153	regulation of striated muscle cell differentiation	12	3	3.19	1238	0.65642	0.28797
GO:0016571	histone methylation	62	16	16.47	1166	0.60223	0.28803
GO:0043409	negative regulation of MAPK cascade	33	8	8.77	1320	0.6828	0.2881
GO:0048278	vesicle docking	37	9	9.83	1318	0.68176	0.28811
GO:0043244	regulation of protein complex disassembly	26	6	6.91	1396	0.72658	0.28813
GO:0051188	cofactor biosynthetic process	94	24	24.97	1198	0.62913	0.28814
GO:0046058	cAMP metabolic process	15	3	3.98	1685	0.80386	0.28815
GO:0051054	positive regulation of DNA metabolic process	20	4	5.31	1715	0.81927	0.28822
GO:0030539	male genitalia development	21	4	5.58	1911	0.84909	0.28828
GO:0046165	alcohol biosynthetic process	30	6	7.97	1902	0.84749	0.28836
GO:0016999	antibiotic metabolic process	50	10	13.28	2112	0.89067	0.28865
GO:0050790	regulation of catalytic activity	311	77	82.62	1643	0.78761	0.28918
GO:0022410	circadian sleep/wake cycle process	37	4	9.83	3118	0.99495	0.2892
GO:0033993	response to lipid	69	12	18.33	2755	0.97365	0.28931
GO:0044282	small molecule catabolic process	118	25	31.35	2326	0.92756	0.28932
GO:0006873	cellular ion homeostasis	112	22	29.75	2656	0.96569	0.28963
GO:0007617	mating behavior	88	12	23.38	3298	0.99894	0.29042
GO:0006289	nucleotide-excision repair	24	8	6.38	540	0.29265	0.29117
GO:0007568	aging	146	22	38.79	3387	0.99972	0.29163
GO:0051253	negative regulation of RNA metabolic process	324	60	86.07	3399	0.99979	0.2938
GO:0007030	Golgi organization	81	24	21.52	550	0.30321	0.30048
GO:0010629	negative regulation of gene expression	510	101	135.49	3428	0.9999	0.30099
GO:0007032	endosome organization	14	5	3.72	555	0.30565	0.30448
GO:0006400	tRNA modification	51	20	13.55	121	0.03264	0.30991
GO:0046579	positive regulation of Ras protein signal transduction	58	15	15.41	1158	0.59832	0.31132
GO:0051607	defense response to virus	39	8	10.36	1922	0.8516	0.31413
GO:0040003	chitin-based cuticle development	97	25	25.77	1182	0.60911	0.32181
GO:0006749	glutathione metabolic process	44	15	11.69	352	0.16731	0.32806
GO:0007056	spindle assembly involved in female meiosis	11	4	2.92	571	0.33055	0.32948
GO:0016973	poly(A)+ mRNA export from nucleus	11	4	2.92	572	0.33055	0.32948
GO:0051181	cofactor transport	11	4	2.92	573	0.33055	0.32948
GO:0007017	microtubule-based process	360	86	95.64	2114	0.89309	0.33345
GO:0006950	response to stress	1030	258	273.63	2106	0.88913	0.3362
GO:0035019	somatic stem cell population maintenance	18	6	4.78	582	0.33789	0.33653
GO:0007626	locomotory behavior	167	25	44.37	3426	0.9999	0.33695
GO:0045087	innate immune response	179	39	47.55	2458	0.94179	0.34055
GO:0006906	vesicle fusion	67	19	17.8	728	0.41487	0.35635
GO:0016050	vesicle organization	121	36	32.14	455	0.24077	0.35887
GO:0000302	response to reactive oxygen species	24	9	6.38	347	0.16205	0.35928
GO:0031167	rRNA methylation	15	6	3.98	370	0.18476	0.35948
GO:0006123	mitochondrial electron transport, cytochrome c to oxygen	8	3	2.13	591	0.3608	0.35985
GO:0006544	glycine metabolic process	8	3	2.13	592	0.3608	0.35985
GO:0008584	male gonad development	8	3	2.13	593	0.3608	0.35985
GO:0030206	chondroitin sulfate biosynthetic process	8	3	2.13	594	0.3608	0.35985
GO:0034427	nuclear-transcribed mRNA catabolic process, exonucleolytic, 3'-5'	8	3	2.13	595	0.3608	0.35985
GO:1900407	regulation of cellular response to oxidative stress	8	3	2.13	596	0.3608	0.35985
GO:1902358	sulfate transmembrane transport	8	3	2.13	597	0.3608	0.35985
GO:0009744	response to sucrose	14	4	3.72	944	0.53322	0.36003
GO:0043112	receptor metabolic process	14	4	3.72	945	0.53322	0.36003
GO:0090068	positive regulation of cell cycle process	34	7	9.03	1774	0.83777	0.36077
GO:0090407	organophosphate biosynthetic process	191	47	50.74	1496	0.75706	0.36133
GO:0006631	fatty acid metabolic process	90	20	23.91	1932	0.85571	0.36138
GO:0048067	cuticle pigmentation	43	7	11.42	2627	0.96192	0.36154
GO:0000184	nuclear-transcribed mRNA catabolic process, nonsense-mediated decay	15	5	3.98	613	0.3661	0.36481
GO:0007080	mitotic metaphase plate congression	15	5	3.98	614	0.3661	0.36481
GO:0006644	phospholipid metabolic process	125	33	33.21	983	0.55136	0.36533
GO:0035151	regulation of tube size, open tracheal system	49	11	13.02	1670	0.79043	0.36611
GO:0007163	establishment or maintenance of cell polarity	201	37	53.4	3218	0.99766	0.37244
GO:0016579	protein deubiquitination	41	11	10.89	971	0.54432	0.37436
GO:0065008	regulation of biological quality	1127	224	299.4	3558	1	0.38806
GO:0008063	Toll signaling pathway	42	14	11.16	427	0.20345	0.38994
GO:0006399	tRNA metabolic process	126	59	33.47	26	7e-07	0.39271
GO:0019752	carboxylic acid metabolic process	329	97	87.4	296	0.12363	0.39691
GO:0065004	protein-DNA complex assembly	61	20	16.21	357	0.16824	0.39772
GO:0016056	rhodopsin mediated signaling pathway	22	9	5.84	235	0.10267	0.39875
GO:0000082	G1/S transition of mitotic cell cycle	34	10	9.03	731	0.41646	0.39885
GO:0043967	histone H4 acetylation	19	6	5.05	635	0.39234	0.39886
GO:0002098	tRNA wobble uridine modification	12	4	3.19	647	0.4001	0.39891
GO:0006298	mismatch repair	12	4	3.19	648	0.4001	0.39891
GO:0045175	basal protein localization	12	4	3.19	649	0.4001	0.39891
GO:0045450	bicoid mRNA localization	12	4	3.19	650	0.4001	0.39891
GO:0046426	negative regulation of JAK-STAT cascade	12	4	3.19	651	0.4001	0.39891
GO:0050975	sensory perception of touch	12	4	3.19	652	0.4001	0.39891
GO:0032273	positive regulation of protein polymerization	40	13	10.63	456	0.24598	0.39895
GO:0006665	sphingolipid metabolic process	57	17	15.14	579	0.33454	0.39909
GO:0042398	cellular modified amino acid biosynthetic process	12	5	3.19	381	0.19147	0.3991
GO:0030041	actin filament polymerization	58	17	15.41	611	0.36469	0.39916
GO:0070972	protein localization to endoplasmic reticulum	21	7	5.58	558	0.31375	0.39921
GO:0043281	regulation of cysteine-type endopeptidase activity involved in apoptotic process	25	8	6.64	580	0.33779	0.39922
GO:1900425	negative regulation of defense response to bacterium	10	4	2.66	477	0.26169	0.39923
GO:0031396	regulation of protein ubiquitination	29	9	7.7	588	0.35806	0.39924
GO:0019732	antifungal humoral response	15	5	3.98	615	0.3661	0.39931
GO:0006739	NADP metabolic process	12	4	3.19	653	0.4001	0.39937
GO:0000467	exonucleolytic trimming to generate mature 3'-end of 5.8S rRNA from tricistronic rRNA transcript (SS...	5	2	1.33	659	0.4002	0.39941
GO:0000491	small nucleolar ribonucleoprotein complex assembly	5	2	1.33	660	0.4002	0.39941
GO:0000727	double-strand break repair via break-induced replication	5	2	1.33	661	0.4002	0.39941
GO:0000921	septin ring assembly	5	2	1.33	662	0.4002	0.39941
GO:0002701	negative regulation of production of molecular mediator of immune response	5	2	1.33	663	0.4002	0.39941
GO:0006241	CTP biosynthetic process	5	2	1.33	664	0.4002	0.39941
GO:0006563	L-serine metabolic process	5	2	1.33	665	0.4002	0.39941
GO:0006591	ornithine metabolic process	5	2	1.33	666	0.4002	0.39941
GO:0006723	cuticle hydrocarbon biosynthetic process	5	2	1.33	667	0.4002	0.39941
GO:0006901	vesicle coating	5	2	1.33	668	0.4002	0.39941
GO:0007563	regulation of eclosion	5	2	1.33	669	0.4002	0.39941
GO:0007604	phototransduction, UV	5	2	1.33	670	0.4002	0.39941
GO:0009221	pyrimidine deoxyribonucleotide biosynthetic process	5	2	1.33	671	0.4002	0.39941
GO:0009415	response to water	5	2	1.33	672	0.4002	0.39941
GO:0009595	detection of biotic stimulus	5	2	1.33	673	0.4002	0.39941
GO:0009951	polarity specification of dorsal/ventral axis	5	2	1.33	674	0.4002	0.39941
GO:0010955	negative regulation of protein processing	5	2	1.33	675	0.4002	0.39941
GO:0030834	regulation of actin filament depolymerization	5	2	1.33	676	0.4002	0.39941
GO:0031061	negative regulation of histone methylation	5	2	1.33	677	0.4002	0.39941
GO:0032351	negative regulation of hormone metabolic process	5	2	1.33	678	0.4002	0.39941
GO:0032469	endoplasmic reticulum calcium ion homeostasis	5	2	1.33	679	0.4002	0.39941
GO:0035001	dorsal trunk growth, open tracheal system	5	2	1.33	680	0.4002	0.39941
GO:0035542	regulation of SNARE complex assembly	5	2	1.33	681	0.4002	0.39941
GO:0040016	embryonic cleavage	5	2	1.33	682	0.4002	0.39941
GO:0045069	regulation of viral genome replication	5	2	1.33	683	0.4002	0.39941
GO:0045317	equator specification	5	2	1.33	684	0.4002	0.39941
GO:0045743	positive regulation of fibroblast growth factor receptor signaling pathway	5	2	1.33	685	0.4002	0.39941
GO:0045943	positive regulation of transcription by RNA polymerase I	5	2	1.33	686	0.4002	0.39941
GO:0045948	positive regulation of translational initiation	5	2	1.33	687	0.4002	0.39941
GO:0048060	negative gravitaxis	5	2	1.33	688	0.4002	0.39941
GO:0048209	regulation of vesicle targeting, to, from or within Golgi	5	2	1.33	689	0.4002	0.39941
GO:0048644	muscle organ morphogenesis	5	2	1.33	690	0.4002	0.39941
GO:0051055	negative regulation of lipid biosynthetic process	5	2	1.33	691	0.4002	0.39941
GO:0051289	protein homotetramerization	5	2	1.33	692	0.4002	0.39941
GO:0051569	regulation of histone H3-K4 methylation	5	2	1.33	693	0.4002	0.39941
GO:0061060	negative regulation of peptidoglycan recognition protein signaling pathway	5	2	1.33	694	0.4002	0.39941
GO:0061088	regulation of sequestering of zinc ion	5	2	1.33	695	0.4002	0.39941
GO:0061382	Malpighian tubule tip cell differentiation	5	2	1.33	696	0.4002	0.39941
GO:0070127	tRNA aminoacylation for mitochondrial protein translation	5	2	1.33	697	0.4002	0.39941
GO:0071046	nuclear polyadenylation-dependent ncRNA catabolic process	5	2	1.33	698	0.4002	0.39941
GO:0072578	neurotransmitter-gated ion channel clustering	5	2	1.33	699	0.4002	0.39941
GO:0090208	positive regulation of triglyceride metabolic process	5	2	1.33	700	0.4002	0.39941
GO:0090224	regulation of spindle organization	5	2	1.33	701	0.4002	0.39941
GO:1902969	mitotic DNA replication	5	2	1.33	702	0.4002	0.39941
GO:1904666	regulation of ubiquitin protein ligase activity	5	2	1.33	703	0.4002	0.39941
GO:2001057	reactive nitrogen species metabolic process	5	2	1.33	704	0.4002	0.39941
GO:0031365	N-terminal protein amino acid modification	13	4	3.45	794	0.4682	0.39944
GO:0046488	phosphatidylinositol metabolic process	66	18	17.53	823	0.49509	0.39946
GO:0060232	delamination	10	3	2.66	906	0.52094	0.39949
GO:1903531	negative regulation of secretion by cell	11	3	2.92	1034	0.59234	0.39956
GO:0045185	maintenance of protein location	34	9	9.03	996	0.57029	0.39959
GO:0051651	maintenance of location in cell	34	9	9.03	997	0.57029	0.39959
GO:0046785	microtubule polymerization	20	5	5.31	1220	0.64661	0.39967
GO:0048678	response to axon injury	18	4	4.78	1462	0.74513	0.39979
GO:0030032	lamellipodium assembly	22	5	5.84	1405	0.73414	0.39981
GO:0035162	embryonic hemopoiesis	23	4	6.11	2136	0.89635	0.40014
GO:0009755	hormone-mediated signaling pathway	36	7	9.56	2014	0.87943	0.40026
GO:0072329	monocarboxylic acid catabolic process	48	10	12.75	1935	0.85784	0.40031
GO:0009156	ribonucleoside monophosphate biosynthetic process	53	11	14.08	1996	0.86967	0.4004
GO:0042176	regulation of protein catabolic process	56	9	14.88	2829	0.97842	0.40115
GO:0048863	stem cell differentiation	80	15	21.25	2625	0.96123	0.40125
GO:1901362	organic cyclic compound biosynthetic process	1292	331	343.23	1699	0.80937	0.40333
GO:0006807	nitrogen compound metabolic process	3931	1199	1044.31	1	2.3e-15	0.40336
GO:0044248	cellular catabolic process	744	182	197.65	2312	0.92131	0.40409
GO:0016192	vesicle-mediated transport	498	112	132.3	2922	0.98642	0.40421
GO:0009792	embryo development ending in birth or egg hatching	171	22	45.43	3490	1	0.4059
GO:0016197	endosomal transport	92	24	24.44	1016	0.58151	0.41213
GO:0003002	regionalization	408	63	108.39	3553	1	0.4122
GO:0006886	intracellular protein transport	324	99	86.07	161	0.05673	0.4137
GO:0048569	post-embryonic animal organ development	417	62	110.78	3568	1	0.41951
GO:0006974	cellular response to DNA damage stimulus	197	60	52.34	295	0.12172	0.42199
GO:0006302	double-strand break repair	70	23	18.6	343	0.14471	0.42357
GO:0006334	nucleosome assembly	22	9	5.84	236	0.10267	0.42416
GO:0018990	ecdysis, chitin-based cuticle	16	5	4.25	735	0.42664	0.42526
GO:0042761	very long-chain fatty acid biosynthetic process	16	5	4.25	736	0.42664	0.42526
GO:0043001	Golgi to plasma membrane protein transport	16	5	4.25	737	0.42664	0.42526
GO:0008298	intracellular mRNA localization	79	19	20.99	1401	0.73385	0.42652
GO:0003333	amino acid transmembrane transport	33	9	8.77	940	0.52957	0.4287
GO:0048513	animal organ development	1084	187	287.98	3613	1	0.43033
GO:0070374	positive regulation of ERK1 and ERK2 cascade	53	15	14.08	743	0.43854	0.43606
GO:0009058	biosynthetic process	2146	636	570.11	44	0.0001	0.44109
GO:0051302	regulation of cell division	24	9	6.38	348	0.16205	0.4414
GO:0050832	defense response to fungus	46	14	12.22	566	0.32671	0.44211
GO:0000338	protein deneddylation	9	3	2.39	745	0.44317	0.44212
GO:0009253	peptidoglycan catabolic process	9	3	2.39	746	0.44317	0.44212
GO:0016574	histone ubiquitination	9	3	2.39	747	0.44317	0.44212
GO:0018279	protein N-linked glycosylation via asparagine	9	3	2.39	748	0.44317	0.44212
GO:0043697	cell dedifferentiation	9	3	2.39	749	0.44317	0.44212
GO:0048140	male germ-line cyst encapsulation	9	3	2.39	750	0.44317	0.44212
GO:0050908	detection of light stimulus involved in visual perception	9	3	2.39	751	0.44317	0.44212
GO:0071481	cellular response to X-ray	9	3	2.39	752	0.44317	0.44212
GO:1900074	negative regulation of neuromuscular synaptic transmission	9	3	2.39	753	0.44317	0.44212
GO:1902117	positive regulation of organelle assembly	9	3	2.39	754	0.44317	0.44212
GO:0060438	trachea development	18	5	4.78	963	0.54286	0.44225
GO:0045476	nurse cell apoptotic process	19	4	5.05	1544	0.78474	0.4427
GO:0009152	purine ribonucleotide biosynthetic process	79	18	20.99	1702	0.81293	0.44338
GO:0030148	sphingolipid biosynthetic process	34	12	9.03	353	0.16764	0.44389
GO:0042742	defense response to bacterium	159	41	42.24	1191	0.61909	0.44402
GO:0072089	stem cell proliferation	106	22	28.16	2361	0.93291	0.44451
GO:0035147	branch fusion, open tracheal system	20	6	5.31	771	0.44661	0.44507
GO:0097352	autophagosome maturation	20	6	5.31	772	0.44661	0.44507
GO:0008306	associative learning	51	5	13.55	3327	0.99923	0.44534
GO:0030111	regulation of Wnt signaling pathway	78	12	20.72	3100	0.99377	0.44541
GO:0048585	negative regulation of response to stimulus	326	64	86.61	3285	0.99883	0.45055
GO:0007052	mitotic spindle organization	68	18	18.06	984	0.55356	0.45581
GO:0065003	protein-containing complex assembly	457	144	121.41	82	0.00872	0.45584
GO:0050953	sensory perception of light stimulus	27	13	7.17	88	0.01309	0.45922
GO:0043086	negative regulation of catalytic activity	73	25	19.39	220	0.08929	0.45925
GO:0050658	RNA transport	99	31	26.3	355	0.1677	0.45942
GO:0006271	DNA strand elongation involved in DNA replication	14	6	3.72	331	0.14106	0.45988
GO:0042558	pteridine-containing compound metabolic process	18	7	4.78	362	0.17729	0.45989
GO:0006613	cotranslational protein targeting to membrane	11	5	2.92	340	0.14119	0.45992
GO:0006913	nucleocytoplasmic transport	113	32	30.02	620	0.36994	0.45992
GO:0051047	positive regulation of secretion	27	9	7.17	489	0.27391	0.45996
GO:0006760	folic acid-containing compound metabolic process	12	5	3.19	382	0.19147	0.45997
GO:0051258	protein polymerization	80	23	21.25	619	0.36898	0.45997
GO:0046134	pyrimidine nucleoside biosynthetic process	9	4	2.39	417	0.19607	0.46
GO:0008154	actin polymerization or depolymerization	66	19	17.53	630	0.38586	0.46003
GO:1905268	negative regulation of chromatin organization	21	7	5.58	559	0.31375	0.46004
GO:0044283	small molecule biosynthetic process	199	54	52.87	782	0.45426	0.46008
GO:1905037	autophagosome organization	37	11	9.83	632	0.39091	0.46008
GO:2001233	regulation of apoptotic signaling pathway	22	7	5.84	609	0.36316	0.46009
GO:0009263	deoxyribonucleotide biosynthetic process	7	3	1.86	519	0.27669	0.46009
GO:0035493	SNARE complex assembly	7	3	1.86	520	0.27669	0.46009
GO:0046132	pyrimidine ribonucleoside biosynthetic process	7	3	1.86	521	0.27669	0.46009
GO:0060148	positive regulation of posttranscriptional gene silencing	8	3	2.13	598	0.3608	0.46014
GO:0010950	positive regulation of endopeptidase activity	24	7	6.38	786	0.46262	0.46019
GO:0046154	rhodopsin metabolic process	17	5	4.52	812	0.48592	0.46021
GO:0008643	carbohydrate transport	21	6	5.58	826	0.49975	0.46022
GO:0015918	sterol transport	21	6	5.58	827	0.49975	0.46022
GO:0098930	axonal transport	25	7	6.64	900	0.51117	0.46023
GO:0006505	GPI anchor metabolic process	29	8	7.7	931	0.52096	0.46025
GO:0036294	cellular response to decreased oxygen levels	29	8	7.7	932	0.52096	0.46025
GO:0018993	somatic sex determination	14	4	3.72	946	0.53322	0.46025
GO:0018206	peptidyl-methionine modification	7	2	1.86	1062	0.59332	0.46028
GO:0032988	ribonucleoprotein complex disassembly	7	2	1.86	1063	0.59332	0.46028
GO:0071241	cellular response to inorganic substance	7	2	1.86	1064	0.59332	0.46028
GO:0010043	response to zinc ion	11	3	2.92	1035	0.59234	0.46029
GO:0097501	stress response to metal ion	11	3	2.92	1036	0.59234	0.46029
GO:1901292	nucleoside phosphate catabolic process	34	9	9.03	998	0.57029	0.46031
GO:0002792	negative regulation of peptide secretion	8	2	2.13	1275	0.67083	0.46032
GO:0002775	antimicrobial peptide production	42	11	11.16	1015	0.58073	0.46033
GO:0006152	purine nucleoside catabolic process	9	2	2.39	1419	0.73588	0.46037
GO:0048679	regulation of axon regeneration	9	2	2.39	1420	0.73588	0.46037
GO:0006144	purine nucleobase metabolic process	17	4	4.52	1349	0.70018	0.4604
GO:0046434	organophosphate catabolic process	51	13	13.55	1193	0.62202	0.4604
GO:0002225	positive regulation of antimicrobial peptide production	25	6	6.64	1328	0.68769	0.46042
GO:0050673	epithelial cell proliferation	10	2	2.66	1646	0.78961	0.46042
GO:0031333	negative regulation of protein complex assembly	14	3	3.72	1498	0.76189	0.46043
GO:0035153	epithelial cell type specification, open tracheal system	15	3	3.98	1686	0.80386	0.46048
GO:0046364	monosaccharide biosynthetic process	12	2	3.19	1955	0.86885	0.46052
GO:0043647	inositol phosphate metabolic process	16	3	4.25	1780	0.83942	0.46053
GO:0050920	regulation of chemotaxis	20	4	5.31	1716	0.81927	0.46054
GO:0002813	regulation of biosynthetic process of antibacterial peptides active against Gram-negative bacteria	13	2	3.45	2143	0.89721	0.46057
GO:0060856	establishment of blood-brain barrier	17	3	4.52	1984	0.86926	0.46058
GO:0046031	ADP metabolic process	21	4	5.58	1912	0.84909	0.46059
GO:0051261	protein depolymerization	29	6	7.7	1718	0.82224	0.46062
GO:0035210	prepupal development	18	3	4.78	2116	0.89409	0.46063
GO:0051402	neuron apoptotic process	23	4	6.11	2137	0.89635	0.46069
GO:0006164	purine nucleotide biosynthetic process	81	19	21.52	1537	0.77482	0.46077
GO:0030522	intracellular receptor signaling pathway	21	3	5.58	2479	0.94513	0.46078
GO:0120034	positive regulation of plasma membrane bounded cell projection assembly	25	4	6.64	2341	0.93006	0.46079
GO:0000075	cell cycle checkpoint	59	13	15.67	1730	0.82551	0.4608
GO:0046666	retinal cell programmed cell death	29	5	7.7	2274	0.91717	0.4608
GO:1990778	protein localization to cell periphery	49	10	13.02	2007	0.87513	0.46086
GO:0000045	autophagosome assembly	35	10	9.3	784	0.45733	0.46089
GO:0072350	tricarboxylic acid metabolic process	35	6	9.3	2362	0.9334	0.46091
GO:0031929	TOR signaling	58	12	15.41	2017	0.88032	0.46093
GO:0043966	histone H3 acetylation	24	7	6.38	787	0.46262	0.46093
GO:0048806	genitalia development	32	5	8.5	2518	0.95285	0.46095
GO:0070201	regulation of establishment of protein localization	55	11	14.61	2157	0.89917	0.46097
GO:0010453	regulation of cell fate commitment	30	4	7.97	2772	0.97545	0.46104
GO:0032874	positive regulation of stress-activated MAPK cascade	23	2	6.11	3061	0.99239	0.46106
GO:0016333	morphogenesis of follicular epithelium	47	8	12.49	2598	0.95636	0.46113
GO:0008610	lipid biosynthetic process	168	40	44.63	1710	0.81688	0.46117
GO:0033047	regulation of mitotic sister chromatid segregation	31	3	8.24	3127	0.99497	0.46127
GO:0051983	regulation of chromosome segregation	37	4	9.83	3119	0.99495	0.46138
GO:0008358	maternal determination of anterior/posterior axis, embryo	86	17	22.85	2475	0.94413	0.46139
GO:0048663	neuron fate commitment	57	9	15.14	2857	0.98181	0.46144
GO:0030865	cortical cytoskeleton organization	66	10	17.53	3041	0.99103	0.4617
GO:0071363	cellular response to growth factor stimulus	70	11	18.6	2994	0.9895	0.46171
GO:0016441	posttranscriptional gene silencing	56	7	14.88	3188	0.99686	0.46176
GO:0010623	programmed cell death involved in cell development	102	18	27.1	2972	0.98762	0.462
GO:0045451	pole plasm oskar mRNA localization	49	11	13.02	1671	0.79043	0.46242
GO:0030703	eggshell formation	85	10	22.58	3394	0.99976	0.46264
GO:0007622	rhythmic behavior	100	14	26.57	3326	0.99923	0.46265
GO:0012501	programmed cell death	321	71	85.28	2753	0.97341	0.46303
GO:0002682	regulation of immune system process	198	35	52.6	3296	0.99891	0.46362
GO:0046530	photoreceptor cell differentiation	184	26	48.88	3471	0.99999	0.46461
GO:0000723	telomere maintenance	29	11	7.7	292	0.12124	0.46578
GO:0007283	spermatogenesis	171	37	45.43	2474	0.94343	0.46617
GO:0030838	positive regulation of actin filament polymerization	35	11	9.3	560	0.31429	0.46645
GO:0009084	glutamine family amino acid biosynthetic process	13	4	3.45	795	0.4682	0.46694
GO:0030150	protein import into mitochondrial matrix	13	4	3.45	796	0.4682	0.46694
GO:0010038	response to metal ion	34	9	9.03	999	0.57029	0.46718
GO:2000113	negative regulation of cellular macromolecule biosynthetic process	383	65	101.75	3505	1	0.46739
GO:0006493	protein O-linked glycosylation	41	10	10.89	1315	0.68131	0.46754
GO:0035107	appendage morphogenesis	301	40	79.96	3560	1	0.46793
GO:0001933	negative regulation of protein phosphorylation	65	15	17.27	1540	0.77982	0.46812
GO:0048736	appendage development	310	41	82.35	3564	1	0.46821
GO:0009893	positive regulation of metabolic process	698	146	185.43	3417	0.99987	0.46822
GO:0061564	axon development	317	41	84.21	3576	1	0.46857
GO:0007389	pattern specification process	440	67	116.89	3566	1	0.46999
GO:0000904	cell morphogenesis involved in differentiation	439	65	116.62	3581	1	0.47033
GO:0006470	protein dephosphorylation	89	23	23.64	1165	0.60202	0.4715
GO:0007350	blastoderm segmentation	183	29	48.62	3409	0.99983	0.47554
GO:0034613	cellular protein localization	471	136	125.13	307	0.13261	0.47914
GO:0007400	neuroblast fate determination	17	5	4.52	813	0.48592	0.48449
GO:0046323	glucose import	17	5	4.52	814	0.48592	0.48449
GO:0019233	sensory perception of pain	71	18	18.86	1201	0.63645	0.48627
GO:0030097	hemopoiesis	81	16	21.52	2452	0.93976	0.48737
GO:0048869	cellular developmental process	1514	279	402.21	3616	1	0.48796
GO:0007281	germ cell development	627	116	166.57	3520	1	0.48998
GO:0045879	negative regulation of smoothened signaling pathway	21	6	5.58	828	0.49975	0.49816
GO:0032259	methylation	117	38	31.08	221	0.08982	0.50004
GO:0007603	phototransduction, visible light	28	11	7.44	228	0.09773	0.50105
GO:0061025	membrane fusion	85	26	22.58	443	0.23283	0.50108
GO:0032984	protein-containing complex disassembly	71	22	18.86	453	0.23513	0.50117
GO:0015695	organic cation transport	11	6	2.92	145	0.04536	0.5012
GO:0060261	positive regulation of transcription initiation from RNA polymerase II promoter	14	6	3.72	332	0.14106	0.50143
GO:0006308	DNA catabolic process	19	7	5.05	434	0.21993	0.50153
GO:0016236	macroautophagy	78	22	20.72	727	0.41319	0.50172
GO:0031057	negative regulation of histone modification	11	4	2.92	574	0.33055	0.50178
GO:0072348	sulfur compound transport	15	5	3.98	616	0.3661	0.5018
GO:0033108	mitochondrial respiratory chain complex assembly	31	9	8.24	768	0.44467	0.50187
GO:0050714	positive regulation of protein secretion	13	4	3.45	797	0.4682	0.50194
GO:0006900	vesicle budding from membrane	17	5	4.52	815	0.48592	0.50196
GO:0000290	deadenylation-dependent decapping of nuclear-transcribed mRNA	6	2	1.59	839	0.50286	0.50198
GO:0000335	negative regulation of transposition, DNA-mediated	6	2	1.59	840	0.50286	0.50198
GO:0000972	transcription-dependent tethering of RNA polymerase II gene DNA at nuclear periphery	6	2	1.59	841	0.50286	0.50198
GO:0006145	purine nucleobase catabolic process	6	2	1.59	842	0.50286	0.50198
GO:0006273	lagging strand elongation	6	2	1.59	843	0.50286	0.50198
GO:0006689	ganglioside catabolic process	6	2	1.59	844	0.50286	0.50198
GO:0006716	juvenile hormone metabolic process	6	2	1.59	845	0.50286	0.50198
GO:0006939	smooth muscle contraction	6	2	1.59	846	0.50286	0.50198
GO:0007144	female meiosis I	6	2	1.59	847	0.50286	0.50198
GO:0007343	egg activation	6	2	1.59	848	0.50286	0.50198
GO:0007348	regulation of syncytial blastoderm mitotic cell cycle	6	2	1.59	849	0.50286	0.50198
GO:0009303	rRNA transcription	6	2	1.59	850	0.50286	0.50198
GO:0010032	meiotic chromosome condensation	6	2	1.59	851	0.50286	0.50198
GO:0010635	regulation of mitochondrial fusion	6	2	1.59	852	0.50286	0.50198
GO:0010888	negative regulation of lipid storage	6	2	1.59	853	0.50286	0.50198
GO:0015937	coenzyme A biosynthetic process	6	2	1.59	854	0.50286	0.50198
GO:0017183	peptidyl-diphthamide biosynthetic process from peptidyl-histidine	6	2	1.59	855	0.50286	0.50198
GO:0019321	pentose metabolic process	6	2	1.59	856	0.50286	0.50198
GO:0019433	triglyceride catabolic process	6	2	1.59	857	0.50286	0.50198
GO:0019919	peptidyl-arginine methylation, to asymmetrical-dimethyl arginine	6	2	1.59	858	0.50286	0.50198
GO:0031112	positive regulation of microtubule polymerization or depolymerization	6	2	1.59	859	0.50286	0.50198
GO:0031397	negative regulation of protein ubiquitination	6	2	1.59	860	0.50286	0.50198
GO:0034497	protein localization to phagophore assembly site	6	2	1.59	861	0.50286	0.50198
GO:0038203	TORC2 signaling	6	2	1.59	862	0.50286	0.50198
GO:0040019	positive regulation of embryonic development	6	2	1.59	863	0.50286	0.50198
GO:0043243	positive regulation of protein complex disassembly	6	2	1.59	864	0.50286	0.50198
GO:0043928	exonucleolytic nuclear-transcribed mRNA catabolic process involved in deadenylation-dependent decay	6	2	1.59	865	0.50286	0.50198
GO:0045823	positive regulation of heart contraction	6	2	1.59	866	0.50286	0.50198
GO:0046688	response to copper ion	6	2	1.59	867	0.50286	0.50198
GO:0050764	regulation of phagocytosis	6	2	1.59	868	0.50286	0.50198
GO:0050994	regulation of lipid catabolic process	6	2	1.59	869	0.50286	0.50198
GO:0051036	regulation of endosome size	6	2	1.59	870	0.50286	0.50198
GO:0055093	response to hyperoxia	6	2	1.59	871	0.50286	0.50198
GO:0060628	regulation of ER to Golgi vesicle-mediated transport	6	2	1.59	872	0.50286	0.50198
GO:0061085	regulation of histone H3-K27 methylation	6	2	1.59	873	0.50286	0.50198
GO:0070534	protein K63-linked ubiquitination	6	2	1.59	874	0.50286	0.50198
GO:0070873	regulation of glycogen metabolic process	6	2	1.59	875	0.50286	0.50198
GO:1900087	positive regulation of G1/S transition of mitotic cell cycle	6	2	1.59	876	0.50286	0.50198
GO:2000637	positive regulation of gene silencing by miRNA	6	2	1.59	877	0.50286	0.50198
GO:0006865	amino acid transport	40	11	10.63	896	0.50684	0.50199
GO:0071902	positive regulation of protein serine/threonine kinase activity	35	8	9.3	1482	0.74942	0.50248
GO:0009060	aerobic respiration	46	10	12.22	1711	0.81764	0.50275
GO:0051050	positive regulation of transport	94	21	24.97	1931	0.85384	0.50326
GO:0051056	regulation of small GTPase mediated signal transduction	131	28	34.8	2340	0.93002	0.5041
GO:0051321	meiotic cell cycle	197	43	52.34	2497	0.94826	0.50487
GO:1901575	organic substance catabolic process	666	166	176.93	1929	0.85274	0.50551
GO:0009948	anterior/posterior axis specification	127	21	33.74	3211	0.99747	0.50586
GO:0016311	dephosphorylation	141	38	37.46	822	0.49098	0.50931
GO:0042147	retrograde transport, endosome to Golgi	25	7	6.64	901	0.51117	0.50945
GO:0007608	sensory perception of smell	52	13	13.81	1234	0.65279	0.51367
GO:0023051	regulation of signaling	782	170	207.75	3353	0.99955	0.51417
GO:0016570	histone modification	174	54	46.22	256	0.10459	0.51702
GO:0009790	embryo development	477	77	126.72	3557	1	0.51739
GO:0006405	RNA export from nucleus	63	21	16.74	336	0.1411	0.51838
GO:0090502	RNA phosphodiester bond hydrolysis, endonucleolytic	20	8	5.31	310	0.13491	0.51897
GO:0090307	mitotic spindle assembly	29	8	7.7	933	0.52096	0.51911
GO:0048522	positive regulation of cellular process	1107	242	294.09	3451	0.99996	0.51951
GO:0006879	cellular iron ion homeostasis	10	3	2.66	907	0.52094	0.51984
GO:0008057	eye pigment granule organization	10	3	2.66	908	0.52094	0.51984
GO:0015701	bicarbonate transport	10	3	2.66	909	0.52094	0.51984
GO:0016075	rRNA catabolic process	10	3	2.66	910	0.52094	0.51984
GO:0019896	axonal transport of mitochondrion	10	3	2.66	911	0.52094	0.51984
GO:0032508	DNA duplex unwinding	10	3	2.66	912	0.52094	0.51984
GO:0034629	cellular protein-containing complex localization	10	3	2.66	913	0.52094	0.51984
GO:0042766	nucleosome mobilization	10	3	2.66	914	0.52094	0.51984
GO:0043153	entrainment of circadian clock by photoperiod	10	3	2.66	915	0.52094	0.51984
GO:0045005	DNA-dependent DNA replication maintenance of fidelity	10	3	2.66	916	0.52094	0.51984
GO:0006368	transcription elongation from RNA polymerase II promoter	31	8	8.24	1178	0.60613	0.52005
GO:0055070	copper ion homeostasis	16	4	4.25	1225	0.64977	0.52006
GO:0032008	positive regulation of TOR signaling	28	7	7.44	1206	0.64514	0.52012
GO:0045448	mitotic cell cycle, embryonic	38	7	10.1	2185	0.91176	0.52111
GO:0030509	BMP signaling pathway	42	7	11.16	2581	0.95466	0.5215
GO:0098609	cell-cell adhesion	104	22	27.63	2279	0.9173	0.52205
GO:0048599	oocyte development	136	26	36.13	2899	0.98387	0.52374
GO:1901700	response to oxygen-containing compound	253	53	67.21	2914	0.98504	0.52533
GO:0090305	nucleic acid phosphodiester bond hydrolysis	74	30	19.66	75	0.006	0.52754
GO:0032509	endosome transport via multivesicular body sorting pathway	20	7	5.31	483	0.26571	0.53131
GO:0006446	regulation of translational initiation	19	6	5.05	636	0.39234	0.53163
GO:0006607	NLS-bearing protein import into nucleus	14	4	3.72	947	0.53322	0.53192
GO:0015012	heparan sulfate proteoglycan biosynthetic process	14	4	3.72	948	0.53322	0.53192
GO:0050806	positive regulation of synaptic transmission	14	4	3.72	949	0.53322	0.53192
GO:0019722	calcium-mediated signaling	20	5	5.31	1221	0.64661	0.53218
GO:0031327	negative regulation of cellular biosynthetic process	393	68	104.4	3493	1	0.53394
GO:0008361	regulation of cell size	92	15	24.44	3089	0.99321	0.53614
GO:0034599	cellular response to oxidative stress	36	12	9.56	442	0.22796	0.54032
GO:0006491	N-glycan processing	18	5	4.78	964	0.54286	0.5414
GO:0008103	oocyte microtubule cytoskeleton polarization	18	5	4.78	965	0.54286	0.5414
GO:0043277	apoptotic cell clearance	18	5	4.78	966	0.54286	0.5414
GO:0030162	regulation of proteolysis	113	32	30.02	621	0.36994	0.54837
GO:0006032	chitin catabolic process	22	6	5.84	975	0.55097	0.54937
GO:0016081	synaptic vesicle docking	22	6	5.84	976	0.55097	0.54937
GO:0042331	phototaxis	22	6	5.84	977	0.55097	0.54937
GO:0070983	dendrite guidance	22	6	5.84	978	0.55097	0.54937
GO:0001666	response to hypoxia	49	13	13.02	988	0.55679	0.54946
GO:0007602	phototransduction	56	20	14.88	204	0.08298	0.55342
GO:1901566	organonitrogen compound biosynthetic process	857	311	227.67	12	2.1e-11	0.55576
GO:0070328	triglyceride homeostasis	26	7	6.91	990	0.55808	0.55635
GO:0034605	cellular response to heat	32	8	8.5	1219	0.64565	0.55669
GO:0035167	larval lymph gland hemopoiesis	43	8	11.42	2280	0.91736	0.55838
GO:0044271	cellular nitrogen compound biosynthetic process	1656	507	439.93	30	1.9e-05	0.56646
GO:0010506	regulation of autophagy	92	18	24.44	2539	0.95406	0.56662
GO:0034976	response to endoplasmic reticulum stress	77	16	20.46	2170	0.9033	0.57123
GO:0045746	negative regulation of Notch signaling pathway	38	10	10.1	1007	0.57569	0.57361
GO:0006281	DNA repair	159	49	42.24	300	0.1288	0.57781
GO:0019991	septate junction assembly	46	12	12.22	1021	0.58547	0.5832
GO:0043436	oxoacid metabolic process	346	102	91.92	265	0.11721	0.58926
GO:0051123	RNA polymerase II transcriptional preinitiation complex assembly	20	7	5.31	484	0.26571	0.59062
GO:0007465	R7 cell fate commitment	18	5	4.78	967	0.54286	0.59117
GO:0030301	cholesterol transport	18	5	4.78	968	0.54286	0.59117
GO:0007638	mechanosensory behavior	11	3	2.92	1037	0.59234	0.59122
GO:0008366	axon ensheathment	11	3	2.92	1038	0.59234	0.59122
GO:0018242	protein O-linked glycosylation via serine	11	3	2.92	1039	0.59234	0.59122
GO:0045572	positive regulation of imaginal disc growth	11	3	2.92	1040	0.59234	0.59122
GO:0061723	glycophagy	11	3	2.92	1041	0.59234	0.59122
GO:0071230	cellular response to amino acid stimulus	11	3	2.92	1042	0.59234	0.59122
GO:0007034	vacuolar transport	45	12	11.95	972	0.55079	0.59123
GO:0031937	positive regulation of chromatin silencing	18	4	4.78	1463	0.74513	0.59154
GO:0010332	response to gamma radiation	19	8	5.05	248	0.10419	0.59158
GO:0007605	sensory perception of sound	54	14	14.35	1143	0.59424	0.59179
GO:0042219	cellular modified amino acid catabolic process	12	5	3.19	383	0.19147	0.59192
GO:0006355	regulation of transcription, DNA-templated	970	228	257.69	3038	0.99097	0.59195
GO:0006360	transcription by RNA polymerase I	13	5	3.45	458	0.24687	0.592
GO:0001941	postsynaptic membrane organization	14	4	3.72	950	0.53322	0.59238
GO:0098656	anion transmembrane transport	72	16	19.13	1771	0.83437	0.59242
GO:0003407	neural retina development	7	2	1.86	1065	0.59332	0.59242
GO:0006098	pentose-phosphate shunt	7	2	1.86	1066	0.59332	0.59242
GO:0006967	positive regulation of antifungal peptide biosynthetic process	7	2	1.86	1067	0.59332	0.59242
GO:0007053	spindle assembly involved in male meiosis	7	2	1.86	1068	0.59332	0.59242
GO:0007141	male meiosis I	7	2	1.86	1069	0.59332	0.59242
GO:0007402	ganglion mother cell fate determination	7	2	1.86	1070	0.59332	0.59242
GO:0009068	aspartate family amino acid catabolic process	7	2	1.86	1071	0.59332	0.59242
GO:0009226	nucleotide-sugar biosynthetic process	7	2	1.86	1072	0.59332	0.59242
GO:0009395	phospholipid catabolic process	7	2	1.86	1073	0.59332	0.59242
GO:0010171	body morphogenesis	7	2	1.86	1074	0.59332	0.59242
GO:0016114	terpenoid biosynthetic process	7	2	1.86	1075	0.59332	0.59242
GO:0016242	negative regulation of macroautophagy	7	2	1.86	1076	0.59332	0.59242
GO:0016486	peptide hormone processing	7	2	1.86	1077	0.59332	0.59242
GO:0016925	protein sumoylation	7	2	1.86	1078	0.59332	0.59242
GO:0019934	cGMP-mediated signaling	7	2	1.86	1079	0.59332	0.59242
GO:0019985	translesion synthesis	7	2	1.86	1080	0.59332	0.59242
GO:0031053	primary miRNA processing	7	2	1.86	1081	0.59332	0.59242
GO:0032367	intracellular cholesterol transport	7	2	1.86	1082	0.59332	0.59242
GO:0032875	regulation of DNA endoreduplication	7	2	1.86	1083	0.59332	0.59242
GO:0033353	S-adenosylmethionine cycle	7	2	1.86	1084	0.59332	0.59242
GO:0034969	histone arginine methylation	7	2	1.86	1085	0.59332	0.59242
GO:0035176	social behavior	7	2	1.86	1086	0.59332	0.59242
GO:0035331	negative regulation of hippo signaling	7	2	1.86	1087	0.59332	0.59242
GO:0042542	response to hydrogen peroxide	7	2	1.86	1088	0.59332	0.59242
GO:0042595	behavioral response to starvation	7	2	1.86	1089	0.59332	0.59242
GO:0042744	hydrogen peroxide catabolic process	7	2	1.86	1090	0.59332	0.59242
GO:0043984	histone H4-K16 acetylation	7	2	1.86	1091	0.59332	0.59242
GO:0044036	cell wall macromolecule metabolic process	7	2	1.86	1092	0.59332	0.59242
GO:0044130	negative regulation of growth of symbiont in host	7	2	1.86	1093	0.59332	0.59242
GO:0045313	rhabdomere membrane biogenesis	7	2	1.86	1094	0.59332	0.59242
GO:0045500	sevenless signaling pathway	7	2	1.86	1095	0.59332	0.59242
GO:0046902	regulation of mitochondrial membrane permeability	7	2	1.86	1096	0.59332	0.59242
GO:0048076	regulation of compound eye pigmentation	7	2	1.86	1097	0.59332	0.59242
GO:0048789	cytoskeletal matrix organization at active zone	7	2	1.86	1098	0.59332	0.59242
GO:0050974	detection of mechanical stimulus involved in sensory perception	7	2	1.86	1099	0.59332	0.59242
GO:0051339	regulation of lyase activity	7	2	1.86	1100	0.59332	0.59242
GO:0051443	positive regulation of ubiquitin-protein transferase activity	7	2	1.86	1101	0.59332	0.59242
GO:0060914	heart formation	7	2	1.86	1102	0.59332	0.59242
GO:0061357	positive regulation of Wnt protein secretion	7	2	1.86	1103	0.59332	0.59242
GO:0061462	protein localization to lysosome	7	2	1.86	1104	0.59332	0.59242
GO:0070129	regulation of mitochondrial translation	7	2	1.86	1105	0.59332	0.59242
GO:0097104	postsynaptic membrane assembly	7	2	1.86	1106	0.59332	0.59242
GO:0007051	spindle organization	113	30	30.02	961	0.53792	0.59246
GO:0007041	lysosomal transport	19	5	5.05	1147	0.59661	0.59248
GO:0007100	mitotic centrosome separation	12	3	3.19	1239	0.65642	0.59252
GO:0097237	cellular response to toxic substance	12	3	3.19	1240	0.65642	0.59252
GO:0042693	muscle cell fate commitment	13	3	3.45	1365	0.71289	0.5926
GO:0007204	positive regulation of cytosolic calcium ion concentration	15	4	3.98	1135	0.59399	0.59269
GO:0016063	rhodopsin biosynthetic process	15	4	3.98	1136	0.59399	0.59269
GO:0035690	cellular response to drug	15	4	3.98	1137	0.59399	0.59269
GO:0031058	positive regulation of histone modification	18	3	4.78	2117	0.89409	0.593
GO:0071390	cellular response to ecdysone	18	3	4.78	2118	0.89409	0.593
GO:0034637	cellular carbohydrate biosynthetic process	25	4	6.64	2342	0.93006	0.59326
GO:0046328	regulation of JNK cascade	52	9	13.81	2606	0.95829	0.59391
GO:0035152	regulation of tube architecture, open tracheal system	83	17	22.05	2304	0.92039	0.59399
GO:0030177	positive regulation of Wnt signaling pathway	35	3	9.3	3253	0.99818	0.59436
GO:0030198	extracellular matrix organization	41	7	10.89	2489	0.94619	0.59438
GO:0032535	regulation of cellular component size	159	35	42.24	2314	0.92204	0.59466
GO:0006091	generation of precursor metabolites and energy	160	35	42.51	2334	0.92848	0.59474
GO:0008362	chitin-based embryonic cuticle biosynthetic process	19	5	5.05	1148	0.59661	0.59516
GO:0016266	O-glycan processing	19	5	5.05	1149	0.59661	0.59516
GO:0060627	regulation of vesicle-mediated transport	117	22	31.08	2854	0.98128	0.59521
GO:0032870	cellular response to hormone stimulus	95	16	25.24	3044	0.99114	0.59525
GO:0006887	exocytosis	95	16	25.24	3045	0.99114	0.59671
GO:0030031	cell projection assembly	122	15	32.41	3456	0.99997	0.59779
GO:0007189	adenylate cyclase-activating G-protein coupled receptor signaling pathway	23	6	6.11	1161	0.59965	0.59806
GO:0007431	salivary gland development	122	13	32.41	3488	1	0.59854
GO:0015833	peptide transport	411	123	109.19	181	0.06464	0.60049
GO:0006259	DNA metabolic process	289	88	76.78	191	0.07424	0.60109
GO:0006891	intra-Golgi vesicle-mediated transport	27	7	7.17	1169	0.60286	0.60114
GO:0045887	positive regulation of synaptic growth at neuromuscular junction	27	7	7.17	1170	0.60286	0.60114
GO:0071456	cellular response to hypoxia	27	7	7.17	1171	0.60286	0.60114
GO:0044550	secondary metabolite biosynthetic process	26	11	6.91	166	0.05954	0.60265
GO:0071426	ribonucleoprotein complex export from nucleus	49	17	13.02	301	0.13032	0.60267
GO:0019637	organophosphate metabolic process	359	99	95.37	585	0.34833	0.60269
GO:0018198	peptidyl-cysteine modification	13	7	3.45	127	0.03342	0.60276
GO:0071897	DNA biosynthetic process	37	12	9.83	466	0.26096	0.60304
GO:0000963	mitochondrial RNA processing	8	4	2.13	322	0.1365	0.60311
GO:0044273	sulfur compound catabolic process	8	4	2.13	323	0.1365	0.60311
GO:0043624	cellular protein complex disassembly	39	12	10.36	577	0.33114	0.60315
GO:0040020	regulation of meiotic nuclear division	9	4	2.39	418	0.19607	0.60316
GO:0000737	DNA catabolic process, endonucleolytic	13	5	3.45	459	0.24687	0.60317
GO:0090174	organelle membrane fusion	70	20	18.6	642	0.39548	0.6032
GO:0051186	cofactor metabolic process	207	56	54.99	789	0.46304	0.60326
GO:0000038	very long-chain fatty acid metabolic process	19	6	5.05	637	0.39234	0.60329
GO:0051238	sequestering of metal ion	8	3	2.13	599	0.3608	0.60331
GO:0090207	regulation of triglyceride metabolic process	8	3	2.13	600	0.3608	0.60331
GO:0006721	terpenoid metabolic process	12	4	3.19	654	0.4001	0.60332
GO:0010165	response to X-ray	12	4	3.19	655	0.4001	0.60332
GO:0002804	positive regulation of antifungal peptide production	10	3	2.66	917	0.52094	0.60342
GO:0046349	amino sugar biosynthetic process	10	3	2.66	918	0.52094	0.60342
GO:0002758	innate immune response-activating signal transduction	14	4	3.72	951	0.53322	0.60343
GO:0048194	Golgi vesicle budding	11	3	2.92	1043	0.59234	0.60347
GO:0001895	retina homeostasis	19	5	5.05	1150	0.59661	0.6035
GO:0006474	N-terminal protein amino acid acetylation	8	2	2.13	1276	0.67083	0.60351
GO:0046686	response to cadmium ion	8	2	2.13	1277	0.67083	0.60351
GO:0071218	cellular response to misfolded protein	8	2	2.13	1278	0.67083	0.60351
GO:0035304	regulation of protein dephosphorylation	12	3	3.19	1241	0.65642	0.60353
GO:0050730	regulation of peptidyl-tyrosine phosphorylation	12	3	3.19	1242	0.65642	0.60353
GO:0098542	defense response to other organism	220	58	58.45	986	0.55371	0.60357
GO:0048168	regulation of neuronal synaptic plasticity	9	2	2.39	1421	0.73588	0.60357
GO:0042278	purine nucleoside metabolic process	28	7	7.44	1207	0.64514	0.60358
GO:1901658	glycosyl compound catabolic process	14	3	3.72	1499	0.76189	0.60363
GO:0032388	positive regulation of intracellular transport	18	4	4.78	1464	0.74513	0.60365
GO:0031445	regulation of heterochromatin assembly	11	2	2.92	1739	0.83345	0.60368
GO:0001672	regulation of chromatin assembly or disassembly	15	3	3.98	1687	0.80386	0.60369
GO:0019395	fatty acid oxidation	34	8	9.03	1392	0.71741	0.6037
GO:0048665	neuron fate specification	12	2	3.19	1956	0.86885	0.60373
GO:0006584	catecholamine metabolic process	16	3	4.25	1781	0.83942	0.60374
GO:0097190	apoptotic signaling pathway	43	10	11.42	1458	0.74211	0.60378
GO:0043487	regulation of RNA stability	13	2	3.45	2144	0.89721	0.60378
GO:0046164	alcohol catabolic process	13	2	3.45	2145	0.89721	0.60378
GO:0046068	cGMP metabolic process	17	3	4.52	1985	0.86926	0.6038
GO:1900426	positive regulation of defense response to bacterium	18	3	4.78	2119	0.89409	0.60385
GO:0032786	positive regulation of DNA-templated transcription, elongation	19	3	5.05	2192	0.91459	0.60391
GO:1902875	regulation of embryonic pattern specification	28	5	7.44	2161	0.9008	0.60398
GO:0035264	multicellular organism growth	48	10	12.75	1936	0.85784	0.60405
GO:0031330	negative regulation of cellular catabolic process	33	6	8.77	2177	0.90614	0.60405
GO:1903364	positive regulation of cellular protein catabolic process	27	4	7.17	2529	0.95353	0.60413
GO:0033301	cell cycle comprising mitosis without cytokinesis	24	3	6.38	2739	0.97247	0.60418
GO:0048639	positive regulation of developmental growth	78	17	20.72	1951	0.86262	0.60425
GO:0007112	male meiosis cytokinesis	31	8	8.24	1179	0.60613	0.60429
GO:0006813	potassium ion transport	50	9	13.28	2471	0.94292	0.60436
GO:0060537	muscle tissue development	29	2	7.7	3267	0.99854	0.60465
GO:0007275	multicellular organism development	1999	402	531.06	3612	1	0.60512
GO:0099531	presynaptic process involved in chemical synaptic transmission	100	17	26.57	3050	0.99153	0.60545
GO:0023014	signal transduction by protein phosphorylation	162	33	43.04	2754	0.97348	0.60556
GO:0051640	organelle localization	230	51	61.1	2494	0.94802	0.60559
GO:1903046	meiotic cell cycle process	187	39	49.68	2731	0.97187	0.6057
GO:0042462	eye photoreceptor cell development	98	14	26.03	3294	0.9989	0.60596
GO:0006417	regulation of translation	149	31	39.58	2607	0.95835	0.60601
GO:0010243	response to organonitrogen compound	124	20	32.94	3244	0.99806	0.60615
GO:0010720	positive regulation of cell development	87	10	23.11	3413	0.99984	0.60618
GO:0043067	regulation of programmed cell death	229	46	60.84	3047	0.99149	0.60658
GO:0051960	regulation of nervous system development	281	50	74.65	3412	0.99984	0.60865
GO:0006338	chromatin remodeling	104	27	27.63	1059	0.59327	0.61075
GO:0006396	RNA processing	542	202	143.99	20	9.9e-09	0.61489
GO:0045893	positive regulation of transcription, DNA-templated	341	75	90.59	2837	0.97968	0.6171
GO:0016477	cell migration	285	41	75.71	3528	1	0.63444
GO:0008593	regulation of Notch signaling pathway	99	26	26.3	995	0.56596	0.64337
GO:2000331	regulation of terminal button organization	24	6	6.38	1211	0.64533	0.64377
GO:0009306	protein secretion	70	19	18.6	835	0.50203	0.64519
GO:0006030	chitin metabolic process	69	18	18.33	1018	0.58196	0.64569
GO:0002168	instar larval development	62	12	16.47	2332	0.92843	0.64573
GO:0007131	reciprocal meiotic recombination	28	6	7.44	1676	0.79378	0.64573
GO:0006325	chromatin organization	334	87	88.73	1181	0.60792	0.64584
GO:0007218	neuropeptide signaling pathway	44	11	11.69	1224	0.64939	0.64729
GO:0007286	spermatid development	67	10	17.8	3071	0.99248	0.64763
GO:0006633	fatty acid biosynthetic process	34	9	9.03	1000	0.57029	0.6484
GO:0032012	regulation of ARF protein signal transduction	16	4	4.25	1226	0.64977	0.6485
GO:0043052	thermotaxis	16	4	4.25	1227	0.64977	0.6485
GO:0045196	establishment or maintenance of neuroblast polarity	16	4	4.25	1228	0.64977	0.6485
GO:0045494	photoreceptor cell maintenance	16	4	4.25	1229	0.64977	0.6485
GO:0002164	larval development	142	29	37.72	2652	0.96442	0.65212
GO:0006623	protein targeting to vacuole	12	3	3.19	1243	0.65642	0.65533
GO:0007482	haltere development	12	3	3.19	1244	0.65642	0.65533
GO:0008333	endosome to lysosome transport	12	3	3.19	1245	0.65642	0.65533
GO:0016226	iron-sulfur cluster assembly	12	3	3.19	1246	0.65642	0.65533
GO:0018107	peptidyl-threonine phosphorylation	12	3	3.19	1247	0.65642	0.65533
GO:0018243	protein O-linked glycosylation via threonine	12	3	3.19	1248	0.65642	0.65533
GO:0032483	regulation of Rab protein signal transduction	12	3	3.19	1249	0.65642	0.65533
GO:0035234	ectopic germ cell programmed cell death	12	3	3.19	1250	0.65642	0.65533
GO:0071577	zinc ion transmembrane transport	12	3	3.19	1251	0.65642	0.65533
GO:0042274	ribosomal small subunit biogenesis	65	33	17.27	31	2.6e-05	0.66523
GO:0042255	ribosome assembly	44	24	11.69	43	7.4e-05	0.66626
GO:0006119	oxidative phosphorylation	67	21	17.8	440	0.22381	0.66896
GO:0051445	regulation of meiotic cell cycle	17	6	4.52	537	0.28436	0.66947
GO:0030833	regulation of actin filament polymerization	53	15	14.08	744	0.43854	0.66963
GO:0009794	regulation of mitotic cell cycle, embryonic	14	4	3.72	952	0.53322	0.66983
GO:0043467	regulation of generation of precursor metabolites and energy	14	4	3.72	953	0.53322	0.66983
GO:0048066	developmental pigmentation	101	27	26.83	937	0.52307	0.66985
GO:0006044	N-acetylglucosamine metabolic process	8	2	2.13	1279	0.67083	0.66995
GO:0006896	Golgi to vacuole transport	8	2	2.13	1280	0.67083	0.66995
GO:0007158	neuron cell-cell adhesion	8	2	2.13	1281	0.67083	0.66995
GO:0007301	female germline ring canal formation	8	2	2.13	1282	0.67083	0.66995
GO:0007539	primary sex determination, soma	8	2	2.13	1283	0.67083	0.66995
GO:0009631	cold acclimation	8	2	2.13	1284	0.67083	0.66995
GO:0010923	negative regulation of phosphatase activity	8	2	2.13	1285	0.67083	0.66995
GO:0031054	pre-miRNA processing	8	2	2.13	1286	0.67083	0.66995
GO:0033119	negative regulation of RNA splicing	8	2	2.13	1287	0.67083	0.66995
GO:0034975	protein folding in endoplasmic reticulum	8	2	2.13	1288	0.67083	0.66995
GO:0036297	interstrand cross-link repair	8	2	2.13	1289	0.67083	0.66995
GO:0045003	double-strand break repair via synthesis-dependent strand annealing	8	2	2.13	1290	0.67083	0.66995
GO:0045705	negative regulation of salivary gland boundary specification	8	2	2.13	1291	0.67083	0.66995
GO:0060074	synapse maturation	8	2	2.13	1292	0.67083	0.66995
GO:0071236	cellular response to antibiotic	8	2	2.13	1293	0.67083	0.66995
GO:0090114	COPII-coated vesicle budding	8	2	2.13	1294	0.67083	0.66995
GO:0097105	presynaptic membrane assembly	8	2	2.13	1295	0.67083	0.66995
GO:0097254	renal tubular secretion	8	2	2.13	1296	0.67083	0.66995
GO:1904059	regulation of locomotor rhythm	8	2	2.13	1297	0.67083	0.66995
GO:0006661	phosphatidylinositol biosynthetic process	35	9	9.3	1183	0.6094	0.67
GO:0006402	mRNA catabolic process	73	19	19.39	1027	0.58629	0.67002
GO:0040001	establishment of mitotic spindle localization	25	6	6.64	1329	0.68769	0.6701
GO:0045785	positive regulation of cell adhesion	19	4	5.05	1545	0.78474	0.67022
GO:0031060	regulation of histone methylation	27	6	7.17	1517	0.76193	0.67025
GO:0016126	sterol biosynthetic process	16	3	4.25	1782	0.83942	0.67028
GO:0034968	histone lysine methylation	43	10	11.42	1459	0.74211	0.67033
GO:0000910	cytokinesis	103	24	27.36	1698	0.80597	0.6709
GO:0009168	purine ribonucleoside monophosphate biosynthetic process	48	9	12.75	2315	0.92279	0.67101
GO:0006875	cellular metal ion homeostasis	75	16	19.92	2013	0.87918	0.67107
GO:0035329	hippo signaling	35	5	9.3	2760	0.97395	0.67118
GO:0051345	positive regulation of hydrolase activity	93	20	24.71	2113	0.89261	0.6713
GO:0042461	photoreceptor cell development	114	16	30.29	3358	0.99961	0.67414
GO:0060548	negative regulation of cell death	129	20	34.27	3308	0.99911	0.67414
GO:0006120	mitochondrial electron transport, NADH to ubiquinone	29	7	7.7	1321	0.68466	0.68303
GO:0040007	growth	413	65	109.72	3548	1	0.68354
GO:0008582	regulation of synaptic growth at neuromuscular junction	98	21	26.03	2165	0.90089	0.68539
GO:0040018	positive regulation of multicellular organism growth	25	6	6.64	1330	0.68769	0.68619
GO:0046329	negative regulation of JNK cascade	25	6	6.64	1331	0.68769	0.68619
GO:0043087	regulation of GTPase activity	87	16	23.11	2734	0.97225	0.68652
GO:0007349	cellularization	83	13	22.05	3101	0.99388	0.68757
GO:0006139	nucleobase-containing compound metabolic process	2078	616	552.04	45	0.00014	0.69082
GO:0007632	visual behavior	21	5	5.58	1345	0.69251	0.69114
GO:0010883	regulation of lipid storage	30	7	7.97	1393	0.72124	0.69132
GO:0007143	female meiotic nuclear division	63	13	16.74	2110	0.88993	0.69258
GO:0051260	protein homooligomerization	22	6	5.84	979	0.55097	0.69869
GO:0006406	mRNA export from nucleus	34	9	9.03	1001	0.57029	0.69876
GO:0000132	establishment of mitotic spindle orientation	17	4	4.52	1350	0.70018	0.69896
GO:0007307	eggshell chorion gene amplification	17	4	4.52	1351	0.70018	0.69896
GO:0035002	liquid clearance, open tracheal system	17	4	4.52	1352	0.70018	0.69896
GO:0090175	regulation of establishment of planar polarity	17	4	4.52	1353	0.70018	0.69896
GO:2000736	regulation of stem cell differentiation	27	5	7.17	2021	0.88169	0.69964
GO:0005975	carbohydrate metabolic process	230	44	61.1	3194	0.997	0.69981
GO:0007173	epidermal growth factor receptor signaling pathway	65	13	17.27	2188	0.91403	0.70049
GO:0070925	organelle assembly	302	74	80.23	1708	0.81379	0.70133
GO:0042752	regulation of circadian rhythm	75	11	19.92	3136	0.99557	0.70239
GO:0008380	RNA splicing	253	96	67.21	37	3.8e-05	0.70268
GO:0048024	regulation of mRNA splicing, via spliceosome	83	29	22.05	160	0.05638	0.70726
GO:0015031	protein transport	401	118	106.53	232	0.10237	0.70741
GO:0034728	nucleosome organization	48	19	12.75	125	0.03332	0.70741
GO:0031334	positive regulation of protein complex assembly	57	20	15.14	223	0.09715	0.70769
GO:0071702	organic substance transport	655	178	174.01	624	0.3715	0.70776
GO:0042775	mitochondrial ATP synthesis coupled electron transport	58	19	15.41	358	0.17714	0.70795
GO:0009072	aromatic amino acid family metabolic process	18	8	4.78	201	0.07778	0.70803
GO:0044773	mitotic DNA damage checkpoint	19	8	5.05	249	0.10419	0.70808
GO:0000479	endonucleolytic cleavage of tricistronic rRNA transcript (SSU-rRNA, 5.8S rRNA, LSU-rRNA)	9	5	2.39	175	0.06205	0.70815
GO:0007259	JAK-STAT cascade	41	13	10.89	527	0.27828	0.70825
GO:0006490	oligosaccharide-lipid intermediate biosynthetic process	12	5	3.19	384	0.19147	0.70831
GO:0051187	cofactor catabolic process	16	6	4.25	447	0.23291	0.70832
GO:0009247	glycolipid biosynthetic process	39	12	10.36	578	0.33114	0.70834
GO:0010822	positive regulation of mitochondrion organization	10	4	2.66	478	0.26169	0.7084
GO:0008652	cellular amino acid biosynthetic process	41	12	10.89	721	0.40461	0.70845
GO:0042559	pteridine-containing compound biosynthetic process	11	4	2.92	575	0.33055	0.70846
GO:0008064	regulation of actin polymerization or depolymerization	57	16	15.14	777	0.4481	0.7085
GO:0070372	regulation of ERK1 and ERK2 cascade	57	16	15.14	778	0.4481	0.7085
GO:1902882	regulation of response to oxidative stress	12	4	3.19	656	0.4001	0.70851
GO:0071684	organism emergence from protective structure	21	6	5.58	829	0.49975	0.70859
GO:0009311	oligosaccharide metabolic process	29	8	7.7	934	0.52096	0.70861
GO:0007530	sex determination	26	7	6.91	991	0.55808	0.70865
GO:0043068	positive regulation of programmed cell death	75	20	19.92	958	0.53637	0.70865
GO:0000731	DNA synthesis involved in DNA repair	11	3	2.92	1044	0.59234	0.70866
GO:0017001	antibiotic catabolic process	11	3	2.92	1045	0.59234	0.70866
GO:0050000	chromosome localization	27	7	7.17	1172	0.60286	0.70871
GO:0051965	positive regulation of synapse assembly	31	8	8.24	1180	0.60613	0.70872
GO:0046824	positive regulation of nucleocytoplasmic transport	9	2	2.39	1422	0.73588	0.70875
GO:0002784	regulation of antimicrobial peptide production	40	10	10.63	1223	0.6479	0.7088
GO:0002237	response to molecule of bacterial origin	14	3	3.72	1500	0.76189	0.70882
GO:0044106	cellular amine metabolic process	22	5	5.84	1406	0.73414	0.70884
GO:0009165	nucleotide biosynthetic process	105	27	27.89	1186	0.61579	0.70885
GO:0021551	central nervous system morphogenesis	11	2	2.92	1740	0.83345	0.70886
GO:0022407	regulation of cell-cell adhesion	27	6	7.17	1518	0.76193	0.70891
GO:0070988	demethylation	12	2	3.19	1957	0.86885	0.70891
GO:0098739	import across plasma membrane	12	2	3.19	1958	0.86885	0.70891
GO:1902653	secondary alcohol biosynthetic process	12	2	3.19	1959	0.86885	0.70891
GO:0044085	cellular component biogenesis	1181	312	313.74	992	0.56216	0.70899
GO:0051090	regulation of DNA binding transcription factor activity	22	4	5.84	2000	0.87464	0.70904
GO:0097306	cellular response to alcohol	22	4	5.84	2001	0.87464	0.70904
GO:0006963	positive regulation of antibacterial peptide biosynthetic process	15	2	3.98	2380	0.93759	0.70907
GO:0046822	regulation of nucleocytoplasmic transport	22	3	5.84	2588	0.95626	0.70924
GO:2000060	positive regulation of ubiquitin-dependent protein catabolic process	22	3	5.84	2589	0.95626	0.70924
GO:0008363	larval chitin-based cuticle development	23	3	6.11	2654	0.96525	0.70929
GO:0032886	regulation of microtubule-based process	47	8	12.49	2599	0.95636	0.70957
GO:0042335	cuticle development	153	36	40.65	1735	0.82893	0.70961
GO:0048640	negative regulation of developmental growth	71	12	18.86	2848	0.9806	0.71005
GO:0070838	divalent metal ion transport	71	12	18.86	2849	0.9806	0.71005
GO:0000280	nuclear division	271	64	71.99	2026	0.88362	0.7103
GO:0060828	regulation of canonical Wnt signaling pathway	57	6	15.14	3328	0.99925	0.7105
GO:0098662	inorganic cation transmembrane transport	135	23	35.86	3191	0.99691	0.71127
GO:0099504	synaptic vesicle cycle	117	17	31.08	3342	0.99944	0.71151
GO:0035218	leg disc development	97	11	25.77	3441	0.99994	0.71164
GO:0008585	female gonad development	13	3	3.45	1366	0.71289	0.71184
GO:0010025	wax biosynthetic process	13	3	3.45	1367	0.71289	0.71184
GO:0019367	fatty acid elongation, saturated fatty acid	13	3	3.45	1368	0.71289	0.71184
GO:0030322	stabilization of membrane potential	13	3	3.45	1369	0.71289	0.71184
GO:0034625	fatty acid elongation, monounsaturated fatty acid	13	3	3.45	1370	0.71289	0.71184
GO:0034626	fatty acid elongation, polyunsaturated fatty acid	13	3	3.45	1371	0.71289	0.71184
GO:0035065	regulation of histone acetylation	13	3	3.45	1372	0.71289	0.71184
GO:0042632	cholesterol homeostasis	13	3	3.45	1373	0.71289	0.71184
GO:0046835	carbohydrate phosphorylation	13	3	3.45	1374	0.71289	0.71184
GO:0031935	regulation of chromatin silencing	40	9	10.63	1534	0.77356	0.71225
GO:0008219	cell death	355	76	94.31	3033	0.99075	0.71245
GO:0007049	cell cycle	669	160	177.73	2526	0.95337	0.71247
GO:0043401	steroid hormone mediated signaling pathway	27	4	7.17	2530	0.95353	0.71279
GO:0030334	regulation of cell migration	33	5	8.77	2614	0.9612	0.713
GO:0032880	regulation of protein localization	83	17	22.05	2305	0.92039	0.71345
GO:0071310	cellular response to organic substance	267	45	70.93	3447	0.99995	0.71397
GO:0031098	stress-activated protein kinase signaling cascade	83	14	22.05	2947	0.98692	0.7145
GO:0032879	regulation of localization	370	70	98.29	3411	0.99983	0.71452
GO:0035214	eye-antennal disc development	63	8	16.74	3221	0.99773	0.71473
GO:0031325	positive regulation of cellular metabolic process	658	139	174.8	3377	0.99968	0.71633
GO:0031323	regulation of cellular metabolic process	1632	396	433.56	3058	0.99196	0.71785
GO:0051171	regulation of nitrogen compound metabolic process	1574	378	418.15	3135	0.99545	0.7184
GO:0050821	protein stabilization	30	7	7.97	1394	0.72124	0.71968
GO:0009966	regulation of signal transduction	691	150	183.57	3310	0.99911	0.7242
GO:0031122	cytoplasmic microtubule organization	26	6	6.91	1397	0.72658	0.72514
GO:0042127	regulation of cell proliferation	204	32	54.19	3440	0.99994	0.72765
GO:0043254	regulation of protein complex assembly	103	35	27.36	163	0.05708	0.73277
GO:0007430	terminal branching, open tracheal system	22	5	5.84	1407	0.73414	0.73284
GO:0030433	ubiquitin-dependent ERAD pathway	22	5	5.84	1408	0.73414	0.73284
GO:0006997	nucleus organization	60	15	15.94	1268	0.65651	0.73287
GO:0008654	phospholipid biosynthetic process	68	15	18.06	1773	0.83713	0.7338
GO:0022904	respiratory electron transport chain	68	21	18.06	460	0.24736	0.73411
GO:0015696	ammonium transport	14	6	3.72	333	0.14106	0.7343
GO:0046425	regulation of JAK-STAT cascade	37	12	9.83	467	0.26096	0.73433
GO:0009416	response to light stimulus	136	38	36.13	631	0.38901	0.73439
GO:0009108	coenzyme biosynthetic process	77	16	20.46	2171	0.9033	0.73441
GO:1903532	positive regulation of secretion by cell	25	8	6.64	581	0.33779	0.73455
GO:0006790	sulfur compound metabolic process	134	36	35.6	834	0.50178	0.73481
GO:1902115	regulation of organelle assembly	25	7	6.64	902	0.51117	0.73483
GO:0030011	maintenance of cell polarity	19	5	5.05	1151	0.59661	0.73495
GO:0000187	activation of MAPK activity	9	2	2.39	1423	0.73588	0.73504
GO:0006937	regulation of muscle contraction	9	2	2.39	1424	0.73588	0.73504
GO:0007064	mitotic sister chromatid cohesion	9	2	2.39	1425	0.73588	0.73504
GO:0008348	negative regulation of antimicrobial humoral response	9	2	2.39	1426	0.73588	0.73504
GO:0008608	attachment of spindle microtubules to kinetochore	9	2	2.39	1427	0.73588	0.73504
GO:0010312	detoxification of zinc ion	9	2	2.39	1428	0.73588	0.73504
GO:0010592	positive regulation of lamellipodium assembly	9	2	2.39	1429	0.73588	0.73504
GO:0031629	synaptic vesicle fusion to presynaptic active zone membrane	9	2	2.39	1430	0.73588	0.73504
GO:0031936	negative regulation of chromatin silencing	9	2	2.39	1431	0.73588	0.73504
GO:0046672	positive regulation of compound eye retinal cell programmed cell death	9	2	2.39	1432	0.73588	0.73504
GO:0050686	negative regulation of mRNA processing	9	2	2.39	1433	0.73588	0.73504
GO:0050732	negative regulation of peptidyl-tyrosine phosphorylation	9	2	2.39	1434	0.73588	0.73504
GO:0051567	histone H3-K9 methylation	9	2	2.39	1435	0.73588	0.73504
GO:0060439	trachea morphogenesis	9	2	2.39	1436	0.73588	0.73504
GO:0061327	anterior Malpighian tubule development	9	2	2.39	1437	0.73588	0.73504
GO:0097150	neuronal stem cell population maintenance	9	2	2.39	1438	0.73588	0.73504
GO:0035209	pupal development	15	3	3.98	1688	0.80386	0.73521
GO:0045456	ecdysteroid biosynthetic process	17	3	4.52	1986	0.86926	0.73536
GO:1902667	regulation of axon guidance	17	3	4.52	1987	0.86926	0.73536
GO:0045924	regulation of female receptivity	18	3	4.78	2120	0.89409	0.73543
GO:0046578	regulation of Ras protein signal transduction	124	26	32.94	2449	0.93932	0.73687
GO:0007475	apposition of dorsal and ventral imaginal disc-derived wing surfaces	18	4	4.78	1465	0.74513	0.74398
GO:0015986	ATP synthesis coupled proton transport	18	4	4.78	1466	0.74513	0.74398
GO:0042136	neurotransmitter biosynthetic process	18	4	4.78	1467	0.74513	0.74398
GO:1904263	positive regulation of TORC1 signaling	18	4	4.78	1468	0.74513	0.74398
GO:0007224	smoothened signaling pathway	54	11	14.35	2100	0.88519	0.74496
GO:0007267	cell-cell signaling	442	77	117.42	3512	1	0.74658
GO:0007293	germarium-derived egg chamber formation	91	13	24.18	3258	0.99845	0.74798
GO:0048646	anatomical structure formation involved in morphogenesis	449	73	119.28	3543	1	0.74826
GO:0006635	fatty acid beta-oxidation	31	7	8.24	1487	0.75481	0.75333
GO:0042059	negative regulation of epidermal growth factor receptor signaling pathway	31	7	8.24	1488	0.75481	0.75333
GO:0043252	sodium-independent organic anion transport	31	7	8.24	1489	0.75481	0.75333
GO:0008104	protein localization	608	165	161.52	629	0.38577	0.75821
GO:0030261	chromosome condensation	52	12	13.81	1519	0.76328	0.76086
GO:0007527	adult somatic muscle development	14	3	3.72	1501	0.76189	0.76091
GO:0030422	production of siRNA involved in RNA interference	14	3	3.72	1502	0.76189	0.76091
GO:0034198	cellular response to amino acid starvation	14	3	3.72	1503	0.76189	0.76091
GO:0035336	long-chain fatty-acyl-CoA metabolic process	14	3	3.72	1504	0.76189	0.76091
GO:0036098	male germ-line stem cell population maintenance	14	3	3.72	1505	0.76189	0.76091
GO:0044804	autophagy of nucleus	14	3	3.72	1506	0.76189	0.76091
GO:0003014	renal system process	22	5	5.84	1409	0.73414	0.76095
GO:0030010	establishment of cell polarity	55	11	14.61	2158	0.89917	0.76185
GO:0001751	compound eye photoreceptor cell differentiation	157	23	41.71	3424	0.9999	0.76681
GO:0043603	cellular amide metabolic process	566	229	150.36	7	5.9e-14	0.76994
GO:0030036	actin cytoskeleton organization	259	46	68.81	3393	0.99973	0.7705
GO:0016070	RNA metabolic process	1632	482	433.56	59	0.00139	0.77441
GO:0006342	chromatin silencing	103	22	27.36	2180	0.90845	0.7792
GO:0000281	mitotic cytokinesis	57	13	15.14	1541	0.78417	0.7823
GO:0007280	pole cell migration	19	4	5.05	1546	0.78474	0.78367
GO:0018193	peptidyl-amino acid modification	292	89	77.57	189	0.0715	0.78374
GO:0007406	negative regulation of neuroblast proliferation	32	7	8.5	1551	0.78537	0.78398
GO:0009314	response to radiation	177	54	47.02	308	0.13301	0.78462
GO:1901605	alpha-amino acid metabolic process	91	30	24.18	244	0.10353	0.78486
GO:0071805	potassium ion transmembrane transport	44	8	11.69	2335	0.92922	0.785
GO:0010821	regulation of mitochondrion organization	22	9	5.84	237	0.10267	0.78536
GO:0044270	cellular nitrogen compound catabolic process	163	46	43.3	583	0.34277	0.78543
GO:0032446	protein modification by small protein conjugation	179	49	47.55	742	0.43076	0.78566
GO:0000266	mitochondrial fission	12	4	3.19	657	0.4001	0.7858
GO:0070816	phosphorylation of RNA polymerase II C-terminal domain	13	4	3.45	798	0.4682	0.78584
GO:0043113	receptor clustering	10	3	2.66	919	0.52094	0.78588
GO:2000765	regulation of cytoplasmic translation	11	3	2.92	1046	0.59234	0.78593
GO:1905039	carboxylic acid transmembrane transport	38	10	10.1	1008	0.57569	0.78596
GO:0001539	cilium or flagellum-dependent cell motility	5	1	1.33	1556	0.78655	0.78601
GO:0001555	oocyte growth	5	1	1.33	1557	0.78655	0.78601
GO:0001706	endoderm formation	5	1	1.33	1558	0.78655	0.78601
GO:0002011	morphogenesis of an epithelial sheet	5	1	1.33	1559	0.78655	0.78601
GO:0006501	C-terminal protein lipidation	5	1	1.33	1560	0.78655	0.78601
GO:0006596	polyamine biosynthetic process	5	1	1.33	1561	0.78655	0.78601
GO:0006684	sphingomyelin metabolic process	5	1	1.33	1562	0.78655	0.78601
GO:0006734	NADH metabolic process	5	1	1.33	1563	0.78655	0.78601
GO:0006777	Mo-molybdopterin cofactor biosynthetic process	5	1	1.33	1564	0.78655	0.78601
GO:0006995	cellular response to nitrogen starvation	5	1	1.33	1565	0.78655	0.78601
GO:0007050	cell cycle arrest	5	1	1.33	1566	0.78655	0.78601
GO:0007216	G-protein coupled glutamate receptor signaling pathway	5	1	1.33	1567	0.78655	0.78601
GO:0007344	pronuclear fusion	5	1	1.33	1568	0.78655	0.78601
GO:0008335	female germline ring canal stabilization	5	1	1.33	1569	0.78655	0.78601
GO:0009301	snRNA transcription	5	1	1.33	1570	0.78655	0.78601
GO:0010889	regulation of sequestering of triglyceride	5	1	1.33	1571	0.78655	0.78601
GO:0015868	purine ribonucleotide transport	5	1	1.33	1572	0.78655	0.78601
GO:0017196	N-terminal peptidyl-methionine acetylation	5	1	1.33	1573	0.78655	0.78601
GO:0019099	female germ-line sex determination	5	1	1.33	1574	0.78655	0.78601
GO:0030037	actin filament reorganization involved in cell cycle	5	1	1.33	1575	0.78655	0.78601
GO:0030702	chromatin silencing at centromere	5	1	1.33	1576	0.78655	0.78601
GO:0030709	border follicle cell delamination	5	1	1.33	1577	0.78655	0.78601
GO:0031113	regulation of microtubule polymerization	5	1	1.33	1578	0.78655	0.78601
GO:0032053	ciliary basal body organization	5	1	1.33	1579	0.78655	0.78601
GO:0032790	ribosome disassembly	5	1	1.33	1580	0.78655	0.78601
GO:0034059	response to anoxia	5	1	1.33	1581	0.78655	0.78601
GO:0034227	tRNA thio-modification	5	1	1.33	1582	0.78655	0.78601
GO:0034284	response to monosaccharide	5	1	1.33	1583	0.78655	0.78601
GO:0034312	diol biosynthetic process	5	1	1.33	1584	0.78655	0.78601
GO:0034315	regulation of Arp2/3 complex-mediated actin nucleation	5	1	1.33	1585	0.78655	0.78601
GO:0034755	iron ion transmembrane transport	5	1	1.33	1586	0.78655	0.78601
GO:0035310	notum cell fate specification	5	1	1.33	1587	0.78655	0.78601
GO:0035459	cargo loading into vesicle	5	1	1.33	1588	0.78655	0.78601
GO:0035626	juvenile hormone mediated signaling pathway	5	1	1.33	1589	0.78655	0.78601
GO:0038001	paracrine signaling	5	1	1.33	1590	0.78655	0.78601
GO:0038061	NIK/NF-kappaB signaling	5	1	1.33	1591	0.78655	0.78601
GO:0043174	nucleoside salvage	5	1	1.33	1592	0.78655	0.78601
GO:0043433	negative regulation of DNA binding transcription factor activity	5	1	1.33	1593	0.78655	0.78601
GO:0044380	protein localization to cytoskeleton	5	1	1.33	1594	0.78655	0.78601
GO:0045022	early endosome to late endosome transport	5	1	1.33	1595	0.78655	0.78601
GO:0045434	negative regulation of female receptivity, post-mating	5	1	1.33	1596	0.78655	0.78601
GO:0045464	R8 cell fate specification	5	1	1.33	1597	0.78655	0.78601
GO:0045850	positive regulation of nurse cell apoptotic process	5	1	1.33	1598	0.78655	0.78601
GO:0046477	glycosylceramide catabolic process	5	1	1.33	1599	0.78655	0.78601
GO:0046602	regulation of mitotic centrosome separation	5	1	1.33	1600	0.78655	0.78601
GO:0046628	positive regulation of insulin receptor signaling pathway	5	1	1.33	1601	0.78655	0.78601
GO:0046833	positive regulation of RNA export from nucleus	5	1	1.33	1602	0.78655	0.78601
GO:0048047	mating behavior, sex discrimination	5	1	1.33	1603	0.78655	0.78601
GO:0048052	R1/R6 cell differentiation	5	1	1.33	1604	0.78655	0.78601
GO:0048104	establishment of body hair or bristle planar orientation	5	1	1.33	1605	0.78655	0.78601
GO:0048525	negative regulation of viral process	5	1	1.33	1606	0.78655	0.78601
GO:0048730	epidermis morphogenesis	5	1	1.33	1607	0.78655	0.78601
GO:0051177	meiotic sister chromatid cohesion	5	1	1.33	1608	0.78655	0.78601
GO:0051291	protein heterooligomerization	5	1	1.33	1609	0.78655	0.78601
GO:0051503	adenine nucleotide transport	5	1	1.33	1610	0.78655	0.78601
GO:0051791	medium-chain fatty acid metabolic process	5	1	1.33	1611	0.78655	0.78601
GO:0070059	intrinsic apoptotic signaling pathway in response to endoplasmic reticulum stress	5	1	1.33	1612	0.78655	0.78601
GO:0070936	protein K48-linked ubiquitination	5	1	1.33	1613	0.78655	0.78601
GO:0071242	cellular response to ammonium ion	5	1	1.33	1614	0.78655	0.78601
GO:0071243	cellular response to arsenic-containing substance	5	1	1.33	1615	0.78655	0.78601
GO:0071276	cellular response to cadmium ion	5	1	1.33	1616	0.78655	0.78601
GO:0071689	muscle thin filament assembly	5	1	1.33	1617	0.78655	0.78601
GO:0071712	ER-associated misfolded protein catabolic process	5	1	1.33	1618	0.78655	0.78601
GO:0071786	endoplasmic reticulum tubular network organization	5	1	1.33	1619	0.78655	0.78601
GO:0090163	establishment of epithelial cell planar polarity	5	1	1.33	1620	0.78655	0.78601
GO:0090382	phagosome maturation	5	1	1.33	1621	0.78655	0.78601
GO:0097327	response to antineoplastic agent	5	1	1.33	1622	0.78655	0.78601
GO:0097384	cellular lipid biosynthetic process	5	1	1.33	1623	0.78655	0.78601
GO:0099517	synaptic vesicle transport along microtubule	5	1	1.33	1624	0.78655	0.78601
GO:1990748	cellular detoxification	5	1	1.33	1625	0.78655	0.78601
GO:2000059	negative regulation of ubiquitin-dependent protein catabolic process	5	1	1.33	1626	0.78655	0.78601
GO:2000117	negative regulation of cysteine-type endopeptidase activity	5	1	1.33	1627	0.78655	0.78601
GO:2000677	regulation of transcription regulatory region DNA binding	5	1	1.33	1628	0.78655	0.78601
GO:2000785	regulation of autophagosome assembly	5	1	1.33	1629	0.78655	0.78601
GO:0044743	protein transmembrane import into intracellular organelle	24	6	6.38	1212	0.64533	0.78601
GO:0006826	iron ion transport	10	2	2.66	1647	0.78961	0.78607
GO:0030730	sequestering of triglyceride	10	2	2.66	1648	0.78961	0.78607
GO:0051125	regulation of actin nucleation	10	2	2.66	1649	0.78961	0.78607
GO:0030149	sphingolipid catabolic process	18	4	4.78	1469	0.74513	0.78609
GO:0042045	epithelial fluid transport	22	5	5.84	1410	0.73414	0.7861
GO:0071322	cellular response to carbohydrate stimulus	11	2	2.92	1741	0.83345	0.78611
GO:0010669	epithelial structure maintenance	15	3	3.98	1689	0.80386	0.78613
GO:0048311	mitochondrion distribution	12	2	3.19	1960	0.86885	0.78616
GO:0007019	microtubule depolymerization	19	3	5.05	2193	0.91459	0.78632
GO:0072583	clathrin-dependent endocytosis	19	3	5.05	2194	0.91459	0.78632
GO:0043902	positive regulation of multi-organism process	43	9	11.42	1898	0.84463	0.78639
GO:0045930	negative regulation of mitotic cell cycle	63	14	16.74	1724	0.82225	0.78645
GO:0072384	organelle transport along microtubule	26	4	6.91	2461	0.94288	0.78648
GO:0033500	carbohydrate homeostasis	39	7	10.36	2322	0.92492	0.78656
GO:0030178	negative regulation of Wnt signaling pathway	32	5	8.5	2519	0.95285	0.78659
GO:0050777	negative regulation of immune response	40	7	10.63	2373	0.93634	0.78661
GO:0097193	intrinsic apoptotic signaling pathway	26	3	6.91	2877	0.98287	0.78666
GO:0050768	negative regulation of neurogenesis	62	12	16.47	2333	0.92843	0.78677
GO:0007315	pole plasm assembly	64	12	17	2487	0.94554	0.78686
GO:0030705	cytoskeleton-dependent intracellular transport	65	12	17.27	2516	0.95267	0.78691
GO:0071407	cellular response to organic cyclic compound	60	10	15.94	2769	0.97533	0.78704
GO:0045132	meiotic chromosome segregation	64	11	17	2735	0.97231	0.78705
GO:0070828	heterochromatin organization	46	6	12.22	3054	0.99189	0.78709
GO:0042386	hemocyte differentiation	40	4	10.63	3212	0.99752	0.78716
GO:0071417	cellular response to organonitrogen compound	65	10	17.27	2989	0.98933	0.78728
GO:0051304	chromosome separation	48	4	12.75	3371	0.99965	0.78755
GO:0000165	MAPK cascade	159	32	42.24	2805	0.97686	0.78784
GO:0000578	embryonic axis specification	124	20	32.94	3245	0.99806	0.78833
GO:0051259	protein complex oligomerization	38	10	10.1	1009	0.57569	0.7887
GO:0050708	regulation of protein secretion	23	6	6.11	1162	0.59965	0.7887
GO:0003384	apical constriction involved in gastrulation	10	2	2.66	1650	0.78961	0.78884
GO:0006390	mitochondrial transcription	10	2	2.66	1651	0.78961	0.78884
GO:0007096	regulation of exit from mitosis	10	2	2.66	1652	0.78961	0.78884
GO:0008089	anterograde axonal transport	10	2	2.66	1653	0.78961	0.78884
GO:0008343	adult feeding behavior	10	2	2.66	1654	0.78961	0.78884
GO:0035160	maintenance of epithelial integrity, open tracheal system	10	2	2.66	1655	0.78961	0.78884
GO:0045143	homologous chromosome segregation	10	2	2.66	1656	0.78961	0.78884
GO:0045498	sex comb development	10	2	2.66	1657	0.78961	0.78884
GO:0048142	germarium-derived cystoblast division	10	2	2.66	1658	0.78961	0.78884
GO:0050775	positive regulation of dendrite morphogenesis	10	2	2.66	1659	0.78961	0.78884
GO:0060326	cell chemotaxis	10	2	2.66	1660	0.78961	0.78884
GO:0070509	calcium ion import	10	2	2.66	1661	0.78961	0.78884
GO:0090316	positive regulation of intracellular protein transport	10	2	2.66	1662	0.78961	0.78884
GO:0009225	nucleotide-sugar metabolic process	19	4	5.05	1547	0.78474	0.78894
GO:0006996	organelle organization	1550	397	411.77	1772	0.83617	0.78916
GO:0019915	lipid storage	45	10	11.95	1681	0.79454	0.78917
GO:0019216	regulation of lipid metabolic process	36	7	9.56	2015	0.87943	0.78933
GO:0006641	triglyceride metabolic process	29	5	7.7	2275	0.91717	0.78937
GO:0007611	learning or memory	149	21	39.58	3437	0.99993	0.78938
GO:0033157	regulation of intracellular protein transport	27	4	7.17	2531	0.95353	0.78949
GO:0010557	positive regulation of macromolecule biosynthetic process	387	83	102.81	3077	0.99268	0.78971
GO:0060322	head development	122	12	32.41	3514	1	0.78971
GO:0007167	enzyme linked receptor protein signaling pathway	235	33	62.43	3515	1	0.79143
GO:0042325	regulation of phosphorylation	243	52	64.56	2767	0.97495	0.79194
GO:0022607	cellular component assembly	1015	238	269.65	3090	0.99324	0.79243
GO:0010501	RNA secondary structure unwinding	28	6	7.44	1677	0.79378	0.79251
GO:0018105	peptidyl-serine phosphorylation	41	9	10.89	1684	0.79951	0.798
GO:0061057	peptidoglycan recognition protein signaling pathway	22	5	5.84	1411	0.73414	0.80292
GO:0016348	imaginal disc-derived leg joint morphogenesis	15	3	3.98	1690	0.80386	0.80297
GO:0042026	protein refolding	15	3	3.98	1691	0.80386	0.80297
GO:0051603	proteolysis involved in cellular protein catabolic process	249	65	66.15	1031	0.59106	0.803
GO:0031338	regulation of vesicle fusion	29	7	7.7	1322	0.68466	0.80331
GO:0021782	glial cell development	30	5	7.97	2354	0.93111	0.80356
GO:0035096	larval midgut cell programmed cell death	24	5	6.38	1693	0.8047	0.80356
GO:0036099	female germ-line stem cell population maintenance	24	5	6.38	1694	0.8047	0.80356
GO:0055059	asymmetric neuroblast division	40	9	10.63	1535	0.77356	0.80366
GO:0008286	insulin receptor signaling pathway	41	6	10.89	2823	0.97801	0.80413
GO:0001934	positive regulation of protein phosphorylation	140	30	37.19	2369	0.93388	0.80484
GO:1901701	cellular response to oxygen-containing compound	118	23	31.35	2730	0.97161	0.80518
GO:0001736	establishment of planar polarity	99	13	26.3	3368	0.99964	0.80666
GO:0007015	actin filament organization	137	29	36.4	2456	0.9411	0.80678
GO:0007346	regulation of mitotic cell cycle	173	37	45.96	2517	0.95272	0.80753
GO:0048468	cell development	1241	225	329.68	3610	1	0.80763
GO:0035220	wing disc development	341	51	90.59	3541	1	0.81014
GO:0010628	positive regulation of gene expression	405	87	107.59	3093	0.99345	0.81107
GO:0009887	animal organ morphogenesis	678	96	180.12	3615	1	0.81109
GO:0046331	lateral inhibition	33	7	8.77	1704	0.81299	0.81169
GO:0009653	anatomical structure morphogenesis	1340	232	355.98	3619	1	0.81181
GO:0030718	germ-line stem cell population maintenance	69	15	18.33	1930	0.85351	0.81237
GO:0006412	translation	407	180	108.12	2	2.3e-15	0.81446
GO:0000902	cell morphogenesis	527	79	140	3600	1	0.8182
GO:0032502	developmental process	2374	495	630.68	3611	1	0.81891
GO:0006814	sodium ion transport	33	5	8.77	2615	0.9612	0.81909
GO:0045471	response to ethanol	69	13	18.33	2499	0.94915	0.8196
GO:0045926	negative regulation of growth	97	18	25.77	2801	0.97561	0.82041
GO:0040011	locomotion	569	93	151.16	3575	1	0.82068
GO:0007526	larval somatic muscle development	29	6	7.7	1719	0.82224	0.82107
GO:0031146	SCF-dependent proteasomal ubiquitin-dependent protein catabolic process	42	9	11.16	1727	0.82318	0.82176
GO:0030707	ovarian follicle cell development	273	41	72.53	3511	1	0.82375
GO:0010389	regulation of G2/M transition of mitotic cell cycle	28	11	7.44	229	0.09773	0.83173
GO:0007271	synaptic transmission, cholinergic	16	6	4.25	448	0.23291	0.83215
GO:0051726	regulation of cell cycle	271	61	71.99	2495	0.94807	0.83244
GO:0006084	acetyl-CoA metabolic process	11	2	2.92	1742	0.83345	0.83276
GO:0006284	base-excision repair	11	2	2.92	1743	0.83345	0.83276
GO:0007020	microtubule nucleation	11	2	2.92	1744	0.83345	0.83276
GO:0007318	pole plasm protein localization	11	2	2.92	1745	0.83345	0.83276
GO:0007436	larval salivary gland morphogenesis	11	2	2.92	1746	0.83345	0.83276
GO:0007488	histoblast morphogenesis	11	2	2.92	1747	0.83345	0.83276
GO:0010977	negative regulation of neuron projection development	11	2	2.92	1748	0.83345	0.83276
GO:0019226	transmission of nerve impulse	11	2	2.92	1749	0.83345	0.83276
GO:0022409	positive regulation of cell-cell adhesion	11	2	2.92	1750	0.83345	0.83276
GO:0030837	negative regulation of actin filament polymerization	11	2	2.92	1751	0.83345	0.83276
GO:0031290	retinal ganglion cell axon guidance	11	2	2.92	1752	0.83345	0.83276
GO:0035158	regulation of tube diameter, open tracheal system	11	2	2.92	1753	0.83345	0.83276
GO:0045742	positive regulation of epidermal growth factor receptor signaling pathway	11	2	2.92	1754	0.83345	0.83276
GO:0046856	phosphatidylinositol dephosphorylation	11	2	2.92	1755	0.83345	0.83276
GO:0048082	regulation of adult chitin-containing cuticle pigmentation	11	2	2.92	1756	0.83345	0.83276
GO:0051085	chaperone cofactor-dependent protein refolding	11	2	2.92	1757	0.83345	0.83276
GO:2000377	regulation of reactive oxygen species metabolic process	11	2	2.92	1758	0.83345	0.83276
GO:1901136	carbohydrate derivative catabolic process	66	16	17.53	1361	0.71014	0.8329
GO:0033227	dsRNA transport	25	5	6.64	1768	0.83395	0.83291
GO:0019731	antibacterial humoral response	29	6	7.7	1720	0.82224	0.83294
GO:0045931	positive regulation of mitotic cell cycle	33	6	8.77	2178	0.90614	0.83318
GO:0040014	regulation of multicellular organism growth	45	9	11.95	2018	0.88135	0.83323
GO:0006006	glucose metabolic process	34	6	9.03	2307	0.92079	0.83324
GO:0050773	regulation of dendrite development	43	6	11.42	2915	0.98514	0.83379
GO:0034332	adherens junction organization	37	4	9.83	3120	0.99495	0.83388
GO:0042180	cellular ketone metabolic process	49	7	13.02	2967	0.98736	0.83393
GO:0016485	protein processing	60	19	15.94	439	0.22336	0.83451
GO:0006486	protein glycosylation	89	25	23.64	724	0.41132	0.8379
GO:0000212	meiotic spindle organization	35	10	9.3	785	0.45733	0.83808
GO:0042023	DNA endoreduplication	23	5	6.11	1526	0.7715	0.83858
GO:0007040	lysosome organization	16	3	4.25	1783	0.83942	0.83861
GO:0007629	flight behavior	16	3	4.25	1784	0.83942	0.83861
GO:0014019	neuroblast development	16	3	4.25	1785	0.83942	0.83861
GO:0016082	synaptic vesicle priming	16	3	4.25	1786	0.83942	0.83861
GO:0048132	female germ-line stem cell asymmetric division	16	3	4.25	1787	0.83942	0.83861
GO:0051642	centrosome localization	16	3	4.25	1788	0.83942	0.83861
GO:0110020	regulation of actomyosin structure organization	16	3	4.25	1789	0.83942	0.83861
GO:0032956	regulation of actin cytoskeleton organization	90	20	23.91	1933	0.85571	0.83933
GO:0007088	regulation of mitotic nuclear division	60	9	15.94	2988	0.98926	0.84015
GO:0009950	dorsal/ventral axis specification	66	10	17.53	3042	0.99103	0.84031
GO:0071705	nitrogen compound transport	521	150	138.41	297	0.12795	0.84067
GO:0051276	chromosome organization	514	125	136.55	2115	0.89404	0.84153
GO:0043484	regulation of RNA splicing	91	30	24.18	245	0.10353	0.84176
GO:0000086	G2/M transition of mitotic cell cycle	34	12	9.03	354	0.16764	0.84223
GO:0018345	protein palmitoylation	16	7	4.25	251	0.10451	0.84227
GO:2001020	regulation of response to DNA damage stimulus	24	9	6.38	349	0.16205	0.84229
GO:0008592	regulation of Toll signaling pathway	23	8	6.11	463	0.24912	0.84241
GO:0045047	protein targeting to ER	15	5	3.98	617	0.3661	0.84255
GO:0043455	regulation of secondary metabolic process	13	4	3.45	799	0.4682	0.84263
GO:0051310	metaphase plate congression	21	6	5.58	830	0.49975	0.84265
GO:0015850	organic hydroxy compound transport	27	7	7.17	1173	0.60286	0.84274
GO:0010035	response to inorganic substance	50	13	13.28	1028	0.58996	0.84276
GO:0032102	negative regulation of response to external stimulus	21	5	5.58	1346	0.69251	0.84281
GO:0006012	galactose metabolic process	6	1	1.59	1798	0.84329	0.84281
GO:0006035	cuticle chitin biosynthetic process	6	1	1.59	1799	0.84329	0.84281
GO:0006047	UDP-N-acetylglucosamine metabolic process	6	1	1.59	1800	0.84329	0.84281
GO:0006264	mitochondrial DNA replication	6	1	1.59	1801	0.84329	0.84281
GO:0006560	proline metabolic process	6	1	1.59	1802	0.84329	0.84281
GO:0006655	phosphatidylglycerol biosynthetic process	6	1	1.59	1803	0.84329	0.84281
GO:0006878	cellular copper ion homeostasis	6	1	1.59	1804	0.84329	0.84281
GO:0006884	cell volume homeostasis	6	1	1.59	1805	0.84329	0.84281
GO:0007299	ovarian follicle cell-cell adhesion	6	1	1.59	1806	0.84329	0.84281
GO:0007425	epithelial cell fate determination, open tracheal system	6	1	1.59	1807	0.84329	0.84281
GO:0007451	dorsal/ventral lineage restriction, imaginal disc	6	1	1.59	1808	0.84329	0.84281
GO:0007487	analia development	6	1	1.59	1809	0.84329	0.84281
GO:0008203	cholesterol metabolic process	6	1	1.59	1810	0.84329	0.84281
GO:0010586	miRNA metabolic process	6	1	1.59	1811	0.84329	0.84281
GO:0010603	regulation of cytoplasmic mRNA processing body assembly	6	1	1.59	1812	0.84329	0.84281
GO:0010996	response to auditory stimulus	6	1	1.59	1813	0.84329	0.84281
GO:0014067	negative regulation of phosphatidylinositol 3-kinase signaling	6	1	1.59	1814	0.84329	0.84281
GO:0015837	amine transport	6	1	1.59	1815	0.84329	0.84281
GO:0016558	protein import into peroxisome matrix	6	1	1.59	1816	0.84329	0.84281
GO:0016601	Rac protein signal transduction	6	1	1.59	1817	0.84329	0.84281
GO:0018200	peptidyl-glutamic acid modification	6	1	1.59	1818	0.84329	0.84281
GO:0019101	female somatic sex determination	6	1	1.59	1819	0.84329	0.84281
GO:0019509	L-methionine salvage from methylthioadenosine	6	1	1.59	1820	0.84329	0.84281
GO:0030336	negative regulation of cell migration	6	1	1.59	1821	0.84329	0.84281
GO:0030382	sperm mitochondrion organization	6	1	1.59	1822	0.84329	0.84281
GO:0030802	regulation of cyclic nucleotide biosynthetic process	6	1	1.59	1823	0.84329	0.84281
GO:0030950	establishment or maintenance of actin cytoskeleton polarity	6	1	1.59	1824	0.84329	0.84281
GO:0031279	regulation of cyclase activity	6	1	1.59	1825	0.84329	0.84281
GO:0031623	receptor internalization	6	1	1.59	1826	0.84329	0.84281
GO:0031990	mRNA export from nucleus in response to heat stress	6	1	1.59	1827	0.84329	0.84281
GO:0032922	circadian regulation of gene expression	6	1	1.59	1828	0.84329	0.84281
GO:0032933	SREBP signaling pathway	6	1	1.59	1829	0.84329	0.84281
GO:0032958	inositol phosphate biosynthetic process	6	1	1.59	1830	0.84329	0.84281
GO:0033559	unsaturated fatty acid metabolic process	6	1	1.59	1831	0.84329	0.84281
GO:0034067	protein localization to Golgi apparatus	6	1	1.59	1832	0.84329	0.84281
GO:0035074	pupation	6	1	1.59	1833	0.84329	0.84281
GO:0035094	response to nicotine	6	1	1.59	1834	0.84329	0.84281
GO:0035156	fusion cell fate specification	6	1	1.59	1835	0.84329	0.84281
GO:0035721	intraciliary retrograde transport	6	1	1.59	1836	0.84329	0.84281
GO:0042694	muscle cell fate specification	6	1	1.59	1837	0.84329	0.84281
GO:0042770	signal transduction in response to DNA damage	6	1	1.59	1838	0.84329	0.84281
GO:0043266	regulation of potassium ion transport	6	1	1.59	1839	0.84329	0.84281
GO:0043392	negative regulation of DNA binding	6	1	1.59	1840	0.84329	0.84281
GO:0045463	R8 cell development	6	1	1.59	1841	0.84329	0.84281
GO:0046365	monosaccharide catabolic process	6	1	1.59	1842	0.84329	0.84281
GO:0046692	sperm competition	6	1	1.59	1843	0.84329	0.84281
GO:0048172	regulation of short-term neuronal synaptic plasticity	6	1	1.59	1844	0.84329	0.84281
GO:0048526	imaginal disc-derived wing expansion	6	1	1.59	1845	0.84329	0.84281
GO:0050848	regulation of calcium-mediated signaling	6	1	1.59	1846	0.84329	0.84281
GO:0051205	protein insertion into membrane	6	1	1.59	1847	0.84329	0.84281
GO:0051255	spindle midzone assembly	6	1	1.59	1848	0.84329	0.84281
GO:0055078	sodium ion homeostasis	6	1	1.59	1849	0.84329	0.84281
GO:0060079	excitatory postsynaptic potential	6	1	1.59	1850	0.84329	0.84281
GO:0060253	negative regulation of glial cell proliferation	6	1	1.59	1851	0.84329	0.84281
GO:0060912	cardiac cell fate specification	6	1	1.59	1852	0.84329	0.84281
GO:0061512	protein localization to cilium	6	1	1.59	1853	0.84329	0.84281
GO:0061883	clathrin-dependent endocytosis involved in vitellogenesis	6	1	1.59	1854	0.84329	0.84281
GO:0070920	regulation of production of small RNA involved in gene silencing by RNA	6	1	1.59	1855	0.84329	0.84281
GO:0071260	cellular response to mechanical stimulus	6	1	1.59	1856	0.84329	0.84281
GO:0071329	cellular response to sucrose stimulus	6	1	1.59	1857	0.84329	0.84281
GO:0086010	membrane depolarization during action potential	6	1	1.59	1858	0.84329	0.84281
GO:0090151	establishment of protein localization to mitochondrial membrane	6	1	1.59	1859	0.84329	0.84281
GO:0090251	protein localization involved in establishment of planar polarity	6	1	1.59	1860	0.84329	0.84281
GO:0090278	negative regulation of peptide hormone secretion	6	1	1.59	1861	0.84329	0.84281
GO:0090481	pyrimidine nucleotide-sugar transmembrane transport	6	1	1.59	1862	0.84329	0.84281
GO:0097320	plasma membrane tubulation	6	1	1.59	1863	0.84329	0.84281
GO:0098700	neurotransmitter loading into synaptic vesicle	6	1	1.59	1864	0.84329	0.84281
GO:0098725	symmetric cell division	6	1	1.59	1865	0.84329	0.84281
GO:1902475	L-alpha-amino acid transmembrane transport	6	1	1.59	1866	0.84329	0.84281
GO:1990182	exosomal secretion	6	1	1.59	1867	0.84329	0.84281
GO:2000105	positive regulation of DNA-dependent DNA replication	6	1	1.59	1868	0.84329	0.84281
GO:2000370	positive regulation of clathrin-dependent endocytosis	6	1	1.59	1869	0.84329	0.84281
GO:2001023	regulation of response to drug	6	1	1.59	1870	0.84329	0.84281
GO:0006515	protein quality control for misfolded or incompletely synthesized proteins	11	2	2.92	1759	0.83345	0.84286
GO:0019674	NAD metabolic process	11	2	2.92	1760	0.83345	0.84286
GO:0010948	negative regulation of cell cycle process	60	15	15.94	1269	0.65651	0.84286
GO:0008016	regulation of heart contraction	22	4	5.84	2002	0.87464	0.84301
GO:0042446	hormone biosynthetic process	27	5	7.17	2022	0.88169	0.84306
GO:0018108	peptidyl-tyrosine phosphorylation	31	6	8.24	1998	0.86974	0.84307
GO:0042133	neurotransmitter metabolic process	28	5	7.44	2162	0.9008	0.84311
GO:0019359	nicotinamide nucleotide biosynthetic process	25	4	6.64	2343	0.93006	0.84314
GO:0009615	response to virus	45	9	11.95	2019	0.88135	0.84319
GO:0032434	regulation of proteasomal ubiquitin-dependent protein catabolic process	24	3	6.38	2740	0.97247	0.84326
GO:0070192	chromosome organization involved in meiotic cell cycle	45	8	11.95	2450	0.93958	0.84335
GO:0002684	positive regulation of immune system process	78	16	20.72	2187	0.91379	0.84348
GO:0007365	periodic partitioning	38	5	10.1	2920	0.98598	0.84354
GO:0009408	response to heat	75	17	19.92	1709	0.8148	0.84354
GO:0035070	salivary gland histolysis	36	3	9.56	3275	0.99859	0.84377
GO:0051493	regulation of cytoskeleton organization	138	27	36.66	2831	0.97864	0.84429
GO:0031047	gene silencing by RNA	69	7	18.33	3402	0.99981	0.84455
GO:1902533	positive regulation of intracellular signal transduction	175	35	46.49	2895	0.98323	0.84459
GO:0051130	positive regulation of cellular component organization	245	53	65.09	2709	0.96987	0.8447
GO:0006351	transcription, DNA-templated	1031	251	273.9	2631	0.96231	0.84514
GO:0033043	regulation of organelle organization	363	79	96.43	2928	0.98672	0.84562
GO:0010941	regulation of cell death	259	50	68.81	3222	0.99777	0.84581
GO:0072499	photoreceptor cell axon guidance	30	6	7.97	1903	0.84749	0.84642
GO:0022603	regulation of anatomical structure morphogenesis	215	30	57.12	3504	1	0.84715
GO:0007472	wing disc morphogenesis	253	35	67.21	3525	1	0.848
GO:0010604	positive regulation of macromolecule metabolic process	643	135	170.82	3388	0.99972	0.84886
GO:0001654	eye development	355	53	94.31	3547	1	0.84955
GO:0010556	regulation of macromolecule biosynthetic process	1127	261	299.4	3230	0.9979	0.84973
GO:0022008	neurogenesis	799	131	212.26	3605	1	0.85217
GO:0090630	activation of GTPase activity	26	5	6.91	1940	0.85951	0.85857
GO:0032507	maintenance of protein location in cell	29	7	7.7	1323	0.68466	0.86815
GO:0044272	sulfur compound biosynthetic process	35	9	9.3	1184	0.6094	0.86824
GO:0000060	protein import into nucleus, translocation	12	2	3.19	1961	0.86885	0.86825
GO:0007016	cytoskeletal anchoring at plasma membrane	12	2	3.19	1962	0.86885	0.86825
GO:0009065	glutamine family amino acid catabolic process	12	2	3.19	1963	0.86885	0.86825
GO:0009855	determination of bilateral symmetry	12	2	3.19	1964	0.86885	0.86825
GO:0018023	peptidyl-lysine trimethylation	12	2	3.19	1965	0.86885	0.86825
GO:0031145	anaphase-promoting complex-dependent catabolic process	12	2	3.19	1966	0.86885	0.86825
GO:0032981	mitochondrial respiratory chain complex I assembly	12	2	3.19	1967	0.86885	0.86825
GO:0035567	non-canonical Wnt signaling pathway	12	2	3.19	1968	0.86885	0.86825
GO:0065002	intracellular protein transmembrane transport	31	7	8.24	1490	0.75481	0.86826
GO:0051225	spindle assembly	62	16	16.47	1167	0.60223	0.86828
GO:0072553	terminal button organization	36	8	9.56	1538	0.77879	0.86832
GO:0043524	negative regulation of neuron apoptotic process	17	3	4.52	1988	0.86926	0.86854
GO:0071711	basement membrane organization	17	3	4.52	1989	0.86926	0.86854
GO:0044267	cellular protein metabolic process	1685	532	447.64	23	1.3e-07	0.86864
GO:0032504	multicellular organism reproduction	952	183	252.91	3559	1	0.87068
GO:0044249	cellular biosynthetic process	2088	623	554.7	40	5.1e-05	0.87081
GO:0007076	mitotic chromosome condensation	22	4	5.84	2003	0.87464	0.87384
GO:0007474	imaginal disc-derived wing vein specification	49	10	13.02	2008	0.87513	0.87392
GO:0006793	phosphorus metabolic process	907	210	240.95	3110	0.99446	0.87483
GO:0007266	Rho protein signal transduction	52	6	13.81	3219	0.99772	0.87543
GO:0007269	neurotransmitter secretion	97	16	25.77	3094	0.99346	0.87596
GO:0006836	neurotransmitter transport	125	21	33.21	3172	0.99661	0.87661
GO:0007264	small GTPase mediated signal transduction	219	42	58.18	3151	0.99616	0.87771
GO:0050829	defense response to Gram-negative bacterium	88	18	23.38	2325	0.92642	0.87843
GO:0007494	midgut development	27	5	7.17	2023	0.88169	0.88084
GO:0046700	heterocycle catabolic process	165	46	43.83	626	0.37874	0.88411
GO:0022411	cellular component disassembly	116	33	30.82	586	0.35558	0.88411
GO:0001522	pseudouridine synthesis	14	5	3.72	556	0.30565	0.88424
GO:0000079	regulation of cyclin-dependent protein serine/threonine kinase activity	17	5	4.52	816	0.48592	0.88435
GO:0007031	peroxisome organization	19	5	5.05	1152	0.59661	0.88443
GO:0006893	Golgi to plasma membrane transport	23	6	6.11	1163	0.59965	0.88444
GO:0033260	nuclear DNA replication	12	3	3.19	1252	0.65642	0.88445
GO:0001746	Bolwig's organ morphogenesis	7	1	1.86	2028	0.88496	0.88454
GO:0005978	glycogen biosynthetic process	7	1	1.86	2029	0.88496	0.88454
GO:0006265	DNA topological change	7	1	1.86	2030	0.88496	0.88454
GO:0006513	protein monoubiquitination	7	1	1.86	2031	0.88496	0.88454
GO:0006662	glycerol ether metabolic process	7	1	1.86	2032	0.88496	0.88454
GO:0007249	I-kappaB kinase/NF-kappaB signaling	7	1	1.86	2033	0.88496	0.88454
GO:0007438	oenocyte development	7	1	1.86	2034	0.88496	0.88454
GO:0007477	notum development	7	1	1.86	2035	0.88496	0.88454
GO:0007516	hemocyte development	7	1	1.86	2036	0.88496	0.88454
GO:0010771	negative regulation of cell morphogenesis involved in differentiation	7	1	1.86	2037	0.88496	0.88454
GO:0014866	skeletal myofibril assembly	7	1	1.86	2038	0.88496	0.88454
GO:0021556	central nervous system formation	7	1	1.86	2039	0.88496	0.88454
GO:0021675	nerve development	7	1	1.86	2040	0.88496	0.88454
GO:0021953	central nervous system neuron differentiation	7	1	1.86	2041	0.88496	0.88454
GO:0022600	digestive system process	7	1	1.86	2042	0.88496	0.88454
GO:0030512	negative regulation of transforming growth factor beta receptor signaling pathway	7	1	1.86	2043	0.88496	0.88454
GO:0032368	regulation of lipid transport	7	1	1.86	2044	0.88496	0.88454
GO:0032413	negative regulation of ion transmembrane transporter activity	7	1	1.86	2045	0.88496	0.88454
GO:0032414	positive regulation of ion transmembrane transporter activity	7	1	1.86	2046	0.88496	0.88454
GO:0034394	protein localization to cell surface	7	1	1.86	2047	0.88496	0.88454
GO:0035262	gonad morphogenesis	7	1	1.86	2048	0.88496	0.88454
GO:0035308	negative regulation of protein dephosphorylation	7	1	1.86	2049	0.88496	0.88454
GO:0043666	regulation of phosphoprotein phosphatase activity	7	1	1.86	2050	0.88496	0.88454
GO:0044728	DNA methylation or demethylation	7	1	1.86	2051	0.88496	0.88454
GO:0045751	negative regulation of Toll signaling pathway	7	1	1.86	2052	0.88496	0.88454
GO:0045842	positive regulation of mitotic metaphase/anaphase transition	7	1	1.86	2053	0.88496	0.88454
GO:0046130	purine ribonucleoside catabolic process	7	1	1.86	2054	0.88496	0.88454
GO:0048312	intracellular distribution of mitochondria	7	1	1.86	2055	0.88496	0.88454
GO:0048680	positive regulation of axon regeneration	7	1	1.86	2056	0.88496	0.88454
GO:0051224	negative regulation of protein transport	7	1	1.86	2057	0.88496	0.88454
GO:0051926	negative regulation of calcium ion transport	7	1	1.86	2058	0.88496	0.88454
GO:0051966	regulation of synaptic transmission, glutamatergic	7	1	1.86	2059	0.88496	0.88454
GO:0071219	cellular response to molecule of bacterial origin	7	1	1.86	2060	0.88496	0.88454
GO:0080009	mRNA methylation	7	1	1.86	2061	0.88496	0.88454
GO:0090309	positive regulation of methylation-dependent chromatin silencing	7	1	1.86	2062	0.88496	0.88454
GO:1901019	regulation of calcium ion transmembrane transporter activity	7	1	1.86	2063	0.88496	0.88454
GO:1903035	negative regulation of response to wounding	7	1	1.86	2064	0.88496	0.88454
GO:1904063	negative regulation of cation transmembrane transport	7	1	1.86	2065	0.88496	0.88454
GO:1905477	positive regulation of protein localization to membrane	7	1	1.86	2066	0.88496	0.88454
GO:2000104	negative regulation of DNA-dependent DNA replication	7	1	1.86	2067	0.88496	0.88454
GO:2000147	positive regulation of cell motility	7	1	1.86	2068	0.88496	0.88454
GO:0030258	lipid modification	79	20	20.99	1204	0.64183	0.88456
GO:0045840	positive regulation of mitotic nuclear division	14	2	3.72	2287	0.91976	0.88466
GO:0080135	regulation of cellular response to stress	101	25	26.83	1348	0.69698	0.88467
GO:0030317	flagellated sperm motility	15	2	3.98	2381	0.93759	0.8847
GO:0032007	negative regulation of TOR signaling	15	2	3.98	2382	0.93759	0.8847
GO:0051924	regulation of calcium ion transport	17	2	4.52	2638	0.9626	0.88477
GO:0030155	regulation of cell adhesion	45	9	11.95	2020	0.88135	0.88483
GO:0032386	regulation of intracellular transport	49	10	13.02	2009	0.87513	0.88484
GO:0003382	epithelial cell morphogenesis	25	3	6.64	2825	0.97826	0.88493
GO:0046626	regulation of insulin receptor signaling pathway	26	3	6.91	2878	0.98287	0.88496
GO:0030048	actin filament-based movement	27	3	7.17	2924	0.98654	0.885
GO:0007442	hindgut morphogenesis	50	8	13.28	2756	0.97377	0.88515
GO:0045088	regulation of innate immune response	85	16	22.58	2650	0.96377	0.88534
GO:0048515	spermatid differentiation	74	11	19.66	3111	0.99472	0.88562
GO:0050807	regulation of synapse organization	135	27	35.86	2710	0.97011	0.88566
GO:0044262	cellular carbohydrate metabolic process	91	14	24.18	3165	0.99634	0.88584
GO:0031401	positive regulation of protein modification process	178	37	47.29	2712	0.97046	0.88586
GO:0048812	neuron projection morphogenesis	414	61	109.98	3570	1	0.88653
GO:0051301	cell division	241	49	64.02	3031	0.9907	0.88654
GO:0035282	segmentation	220	32	58.45	3485	1	0.88812
GO:0045089	positive regulation of innate immune response	49	10	13.02	2010	0.87513	0.88847
GO:0007443	Malpighian tubule morphogenesis	40	7	10.63	2374	0.93634	0.88865
GO:0045595	regulation of cell differentiation	313	47	83.15	3526	1	0.88952
GO:0030431	sleep	74	10	19.66	3231	0.99792	0.88974
GO:0033365	protein localization to organelle	175	56	46.49	168	0.06143	0.89097
GO:0016339	calcium-dependent cell-cell adhesion via plasma membrane cell adhesion molecules	18	3	4.78	2121	0.89409	0.89345
GO:0048137	spermatocyte division	18	3	4.78	2122	0.89409	0.89345
GO:0007140	male meiotic nuclear division	64	14	17	1795	0.84026	0.89371
GO:0019730	antimicrobial humoral response	80	18	21.25	1736	0.82979	0.89376
GO:0030182	neuron differentiation	678	105	180.12	3606	1	0.89529
GO:0048523	negative regulation of cellular process	1039	204	276.02	3555	1	0.89536
GO:0007614	short-term memory	23	4	6.11	2138	0.89635	0.89564
GO:0044719	regulation of imaginal disc-derived wing size	23	4	6.11	2139	0.89635	0.89564
GO:0032147	activation of protein kinase activity	32	6	8.5	2107	0.88921	0.89573
GO:0035159	regulation of tube length, open tracheal system	34	6	9.03	2308	0.92079	0.89586
GO:0000077	DNA damage checkpoint	34	10	9.03	732	0.41646	0.89626
GO:0034220	ion transmembrane transport	231	45	61.37	3143	0.99564	0.89659
GO:0008088	axo-dendritic transport	38	9	10.1	1387	0.71467	0.89662
GO:0051668	localization within membrane	23	5	6.11	1527	0.7715	0.89662
GO:0016325	oocyte microtubule cytoskeleton organization	31	7	8.24	1491	0.75481	0.89665
GO:0009047	dosage compensation by hyperactivation of X chromosome	13	2	3.45	2146	0.89721	0.89668
GO:0042417	dopamine metabolic process	13	2	3.45	2147	0.89721	0.89668
GO:0045773	positive regulation of axon extension	13	2	3.45	2148	0.89721	0.89668
GO:0007179	transforming growth factor beta receptor signaling pathway	20	3	5.31	2356	0.93141	0.89683
GO:0043648	dicarboxylic acid metabolic process	26	3	6.91	2879	0.98287	0.89711
GO:0035017	cuticle pattern formation	32	4	8.5	2901	0.98419	0.89722
GO:0006959	humoral immune response	94	20	24.97	2168	0.90309	0.8973
GO:0048489	synaptic vesicle transport	81	13	21.52	3048	0.99152	0.89792
GO:0007548	sex differentiation	93	16	24.71	2977	0.98809	0.89796
GO:0045727	positive regulation of translation	33	7	8.77	1705	0.81299	0.89987
GO:0048477	oogenesis	554	104	147.18	3491	1	0.90199
GO:0016322	neuron remodeling	51	10	13.55	2175	0.90458	0.90357
GO:0045793	positive regulation of cell size	33	6	8.77	2179	0.90614	0.90535
GO:0006096	glycolytic process	19	3	5.05	2195	0.91459	0.91403
GO:1902476	chloride transmembrane transport	24	4	6.38	2203	0.91468	0.91405
GO:0007029	endoplasmic reticulum organization	24	4	6.38	2204	0.91468	0.9141
GO:0051017	actin filament bundle assembly	30	4	7.97	2773	0.97545	0.91439
GO:0010906	regulation of glucose metabolic process	14	3	3.72	1507	0.76189	0.91515
GO:0051480	regulation of cytosolic calcium ion concentration	23	5	6.11	1528	0.7715	0.9152
GO:0000712	resolution of meiotic recombination intermediates	8	1	2.13	2210	0.91555	0.9152
GO:0000729	DNA double-strand break processing	8	1	2.13	2211	0.91555	0.9152
GO:0001676	long-chain fatty acid metabolic process	8	1	2.13	2212	0.91555	0.9152
GO:0006482	protein demethylation	8	1	2.13	2213	0.91555	0.9152
GO:0006509	membrane protein ectodomain proteolysis	8	1	2.13	2214	0.91555	0.9152
GO:0006697	ecdysone biosynthetic process	8	1	2.13	2215	0.91555	0.9152
GO:0007288	sperm axoneme assembly	8	1	2.13	2216	0.91555	0.9152
GO:0009651	response to salt stress	8	1	2.13	2217	0.91555	0.9152
GO:0016578	histone deubiquitination	8	1	2.13	2218	0.91555	0.9152
GO:0031453	positive regulation of heterochromatin assembly	8	1	2.13	2219	0.91555	0.9152
GO:0032387	negative regulation of intracellular transport	8	1	2.13	2220	0.91555	0.9152
GO:0034446	substrate adhesion-dependent cell spreading	8	1	2.13	2221	0.91555	0.9152
GO:0035269	protein O-linked mannosylation	8	1	2.13	2222	0.91555	0.9152
GO:0035335	peptidyl-tyrosine dephosphorylation	8	1	2.13	2223	0.91555	0.9152
GO:0046533	negative regulation of photoreceptor cell differentiation	8	1	2.13	2224	0.91555	0.9152
GO:0046664	dorsal closure, amnioserosa morphology change	8	1	2.13	2225	0.91555	0.9152
GO:0046673	negative regulation of compound eye retinal cell programmed cell death	8	1	2.13	2226	0.91555	0.9152
GO:0046855	inositol phosphate dephosphorylation	8	1	2.13	2227	0.91555	0.9152
GO:0046885	regulation of hormone biosynthetic process	8	1	2.13	2228	0.91555	0.9152
GO:0048096	chromatin-mediated maintenance of transcription	8	1	2.13	2229	0.91555	0.9152
GO:0048148	behavioral response to cocaine	8	1	2.13	2230	0.91555	0.9152
GO:0048682	sprouting of injured axon	8	1	2.13	2231	0.91555	0.9152
GO:0050911	detection of chemical stimulus involved in sensory perception of smell	8	1	2.13	2232	0.91555	0.9152
GO:0051383	kinetochore organization	8	1	2.13	2233	0.91555	0.9152
GO:0055075	potassium ion homeostasis	8	1	2.13	2234	0.91555	0.9152
GO:0061331	epithelial cell proliferation involved in Malpighian tubule morphogenesis	8	1	2.13	2235	0.91555	0.9152
GO:0070072	vacuolar proton-transporting V-type ATPase complex assembly	8	1	2.13	2236	0.91555	0.9152
GO:0072175	epithelial tube formation	8	1	2.13	2237	0.91555	0.9152
GO:0098659	inorganic cation import across plasma membrane	8	1	2.13	2238	0.91555	0.9152
GO:1901216	positive regulation of neuron death	8	1	2.13	2239	0.91555	0.9152
GO:1901739	regulation of myoblast fusion	8	1	2.13	2240	0.91555	0.9152
GO:1902669	positive regulation of axon guidance	8	1	2.13	2241	0.91555	0.9152
GO:1903578	regulation of ATP metabolic process	8	1	2.13	2242	0.91555	0.9152
GO:1904064	positive regulation of cation transmembrane transport	8	1	2.13	2243	0.91555	0.9152
GO:1904262	negative regulation of TORC1 signaling	8	1	2.13	2244	0.91555	0.9152
GO:1904375	regulation of protein localization to cell periphery	8	1	2.13	2245	0.91555	0.9152
GO:0035309	wing and notum subfield formation	13	2	3.45	2149	0.89721	0.91524
GO:0002805	regulation of antimicrobial peptide biosynthetic process	32	7	8.5	1552	0.78537	0.91524
GO:0010591	regulation of lamellipodium assembly	17	3	4.52	1990	0.86926	0.91524
GO:1901570	fatty acid derivative biosynthetic process	21	4	5.58	1913	0.84909	0.91525
GO:0048103	somatic stem cell division	49	11	13.02	1672	0.79043	0.9153
GO:0045570	regulation of imaginal disc growth	28	5	7.44	2163	0.9008	0.91535
GO:0006637	acyl-CoA metabolic process	35	6	9.3	2363	0.9334	0.91545
GO:0045333	cellular respiration	100	23	26.57	1726	0.82228	0.91548
GO:0007277	pole cell development	26	3	6.91	2880	0.98287	0.91552
GO:0070507	regulation of microtubule cytoskeleton organization	43	7	11.42	2628	0.96192	0.91558
GO:0010638	positive regulation of organelle organization	130	29	34.54	2104	0.88812	0.91571
GO:1902532	negative regulation of intracellular signal transduction	94	19	24.97	2448	0.93925	0.91576
GO:0045466	R7 cell differentiation	52	6	13.81	3220	0.99772	0.91597
GO:0030717	oocyte karyosome formation	29	5	7.7	2276	0.91717	0.9165
GO:0035011	melanotic encapsulation of foreign target	29	5	7.7	2277	0.91717	0.9165
GO:0045886	negative regulation of synaptic growth at neuromuscular junction	43	8	11.42	2281	0.91736	0.91653
GO:0008152	metabolic process	4778	1366	1269.33	24	2.7e-07	0.91881
GO:0009411	response to UV	26	8	6.91	628	0.38384	0.91889
GO:0006182	cGMP biosynthetic process	14	2	3.72	2288	0.91976	0.91931
GO:0030514	negative regulation of BMP signaling pathway	14	2	3.72	2289	0.91976	0.91931
GO:0031114	regulation of microtubule depolymerization	14	2	3.72	2290	0.91976	0.91931
GO:0038083	peptidyl-tyrosine autophosphorylation	14	2	3.72	2291	0.91976	0.91931
GO:0044331	cell-cell adhesion mediated by cadherin	14	2	3.72	2292	0.91976	0.91931
GO:1990709	presynaptic active zone organization	14	2	3.72	2293	0.91976	0.91931
GO:2000134	negative regulation of G1/S transition of mitotic cell cycle	14	2	3.72	2294	0.91976	0.91931
GO:0048193	Golgi vesicle transport	131	33	34.8	1312	0.6725	0.91932
GO:0006511	ubiquitin-dependent protein catabolic process	220	58	58.45	987	0.55371	0.91945
GO:0006090	pyruvate metabolic process	33	5	8.77	2616	0.9612	0.91962
GO:0016334	establishment or maintenance of polarity of follicular epithelium	26	3	6.91	2881	0.98287	0.91964
GO:0030163	protein catabolic process	275	69	73.06	1417	0.73466	0.91967
GO:0006469	negative regulation of protein kinase activity	27	3	7.17	2925	0.98654	0.91968
GO:0035075	response to ecdysone	44	6	11.69	2974	0.98783	0.91991
GO:0006816	calcium ion transport	55	8	14.61	2991	0.98933	0.92005
GO:0042593	glucose homeostasis	34	6	9.03	2309	0.92079	0.92009
GO:0060070	canonical Wnt signaling pathway	71	8	18.86	3357	0.99957	0.92068
GO:0045596	negative regulation of cell differentiation	104	16	27.63	3229	0.99784	0.9208
GO:0007265	Ras protein signal transduction	190	36	50.48	3117	0.99487	0.92125
GO:0009952	anterior/posterior pattern specification	154	24	40.91	3366	0.99963	0.9216
GO:0034622	cellular protein-containing complex assembly	405	126	107.59	110	0.02048	0.92252
GO:0016310	phosphorylation	535	114	142.13	3260	0.99846	0.92344
GO:0007165	signal transduction	1368	279	363.42	3563	1	0.92418
GO:0006629	lipid metabolic process	402	96	106.8	2176	0.9058	0.92607
GO:0007157	heterophilic cell-cell adhesion via plasma membrane cell adhesion molecules	25	4	6.64	2344	0.93006	0.92951
GO:0007317	regulation of pole plasm oskar mRNA localization	25	4	6.64	2345	0.93006	0.92951
GO:0008293	torso signaling pathway	25	4	6.64	2346	0.93006	0.92951
GO:0035149	lumen formation, open tracheal system	25	4	6.64	2347	0.93006	0.92951
GO:0042052	rhabdomere development	42	8	11.16	2173	0.90383	0.93274
GO:0048149	behavioral response to ethanol	49	9	13.02	2367	0.93352	0.93277
GO:0035206	regulation of hemocyte proliferation	35	6	9.3	2364	0.9334	0.93277
GO:0006397	mRNA processing	288	104	76.51	47	0.00018	0.93322
GO:0010004	gastrulation involving germ band extension	31	10	8.24	543	0.29539	0.93673
GO:1902905	positive regulation of supramolecular fiber organization	50	13	13.28	1029	0.58996	0.93699
GO:0019236	response to pheromone	15	2	3.98	2383	0.93759	0.93721
GO:0030713	ovarian follicle cell stalk formation	15	2	3.98	2384	0.93759	0.93721
GO:0051091	positive regulation of DNA binding transcription factor activity	15	2	3.98	2385	0.93759	0.93721
GO:0051865	protein autoubiquitination	15	2	3.98	2386	0.93759	0.93721
GO:0060795	cell fate commitment involved in formation of primary germ layer	15	2	3.98	2387	0.93759	0.93721
GO:0060857	establishment of glial blood-brain barrier	15	2	3.98	2388	0.93759	0.93721
GO:0048167	regulation of synaptic plasticity	24	4	6.38	2205	0.91468	0.93726
GO:0006611	protein export from nucleus	58	18	15.41	482	0.26181	0.93733
GO:0010508	positive regulation of autophagy	31	4	8.24	2842	0.98027	0.9375
GO:0097194	execution phase of apoptosis	19	5	5.05	1153	0.59661	0.93759
GO:0045834	positive regulation of lipid metabolic process	14	3	3.72	1508	0.76189	0.93765
GO:0050805	negative regulation of synaptic transmission	18	4	4.78	1470	0.74513	0.93766
GO:0005991	trehalose metabolic process	9	1	2.39	2401	0.938	0.93772
GO:0006020	inositol metabolic process	9	1	2.39	2402	0.938	0.93772
GO:0006376	mRNA splice site selection	9	1	2.39	2403	0.938	0.93772
GO:0006855	drug transmembrane transport	9	1	2.39	2404	0.938	0.93772
GO:0007060	male meiosis chromosome segregation	9	1	2.39	2405	0.938	0.93772
GO:0007458	progression of morphogenetic furrow involved in compound eye morphogenesis	9	1	2.39	2406	0.938	0.93772
GO:0008062	eclosion rhythm	9	1	2.39	2407	0.938	0.93772
GO:0009113	purine nucleobase biosynthetic process	9	1	2.39	2408	0.938	0.93772
GO:0009407	toxin catabolic process	9	1	2.39	2409	0.938	0.93772
GO:0016204	determination of muscle attachment site	9	1	2.39	2410	0.938	0.93772
GO:0030540	female genitalia development	9	1	2.39	2411	0.938	0.93772
GO:0032496	response to lipopolysaccharide	9	1	2.39	2412	0.938	0.93772
GO:0034334	adherens junction maintenance	9	1	2.39	2413	0.938	0.93772
GO:0035041	sperm chromatin decondensation	9	1	2.39	2414	0.938	0.93772
GO:0035288	anterior head segmentation	9	1	2.39	2415	0.938	0.93772
GO:0040015	negative regulation of multicellular organism growth	9	1	2.39	2416	0.938	0.93772
GO:0043407	negative regulation of MAP kinase activity	9	1	2.39	2417	0.938	0.93772
GO:0045571	negative regulation of imaginal disc growth	9	1	2.39	2418	0.938	0.93772
GO:0048036	central complex development	9	1	2.39	2419	0.938	0.93772
GO:0048738	cardiac muscle tissue development	9	1	2.39	2420	0.938	0.93772
GO:0048791	calcium ion-regulated exocytosis of neurotransmitter	9	1	2.39	2421	0.938	0.93772
GO:0050918	positive chemotaxis	9	1	2.39	2422	0.938	0.93772
GO:0050965	detection of temperature stimulus involved in sensory perception of pain	9	1	2.39	2423	0.938	0.93772
GO:0060250	germ-line stem-cell niche homeostasis	9	1	2.39	2424	0.938	0.93772
GO:0060361	flight	9	1	2.39	2425	0.938	0.93772
GO:0060401	cytosolic calcium ion transport	9	1	2.39	2426	0.938	0.93772
GO:0070193	synaptonemal complex organization	9	1	2.39	2427	0.938	0.93772
GO:0070278	extracellular matrix constituent secretion	9	1	2.39	2428	0.938	0.93772
GO:0090328	regulation of olfactory learning	9	1	2.39	2429	0.938	0.93772
GO:0000041	transition metal ion transport	30	6	7.97	1904	0.84749	0.93777
GO:0035006	melanization defense response	44	9	11.69	1953	0.86399	0.93784
GO:0046621	negative regulation of organ growth	18	2	4.78	2715	0.97116	0.93785
GO:0045860	positive regulation of protein kinase activity	56	12	14.88	1906	0.84788	0.93786
GO:0035215	genital disc development	46	5	12.22	3215	0.99757	0.93788
GO:0046667	compound eye retinal cell programmed cell death	27	4	7.17	2532	0.95353	0.93789
GO:0009593	detection of chemical stimulus	21	2	5.58	2948	0.98696	0.93793
GO:0016482	cytosolic transport	53	10	14.08	2328	0.92798	0.93798
GO:0035172	hemocyte proliferation	44	7	11.69	2694	0.9681	0.93803
GO:0030239	myofibril assembly	46	7	12.22	2810	0.97781	0.93808
GO:0001752	compound eye photoreceptor fate commitment	48	7	12.75	2911	0.98472	0.93814
GO:0048546	digestive tract morphogenesis	59	9	15.67	2959	0.98717	0.93822
GO:0045937	positive regulation of phosphate metabolic process	155	31	41.18	2808	0.97764	0.93857
GO:0044087	regulation of cellular component biogenesis	286	65	75.98	2473	0.94306	0.93866
GO:0048588	developmental cell growth	67	6	17.8	3436	0.99993	0.93872
GO:0006812	cation transport	232	43	61.63	3274	0.99858	0.93935
GO:0007166	cell surface receptor signaling pathway	607	117	161.26	3484	0.99999	0.93947
GO:0007419	ventral cord development	68	13	18.06	2459	0.9418	0.941
GO:0032456	endocytic recycling	31	5	8.24	2468	0.94291	0.94239
GO:0045824	negative regulation of innate immune response	26	4	6.91	2462	0.94288	0.94241
GO:0002165	instar larval or pupal development	488	74	129.64	3588	1	0.94304
GO:0002009	morphogenesis of an epithelium	539	82	143.19	3596	1	0.94359
GO:0042048	olfactory behavior	68	6	18.06	3442	0.99994	0.94386
GO:0007219	Notch signaling pathway	125	32	33.21	1200	0.63105	0.94453
GO:0033554	cellular response to stress	525	138	139.47	1013	0.57726	0.94455
GO:0000915	actomyosin contractile ring assembly	21	3	5.58	2480	0.94513	0.94472
GO:0033627	cell adhesion mediated by integrin	21	3	5.58	2481	0.94513	0.94472
GO:0051491	positive regulation of filopodium assembly	21	3	5.58	2482	0.94513	0.94472
GO:0031532	actin cytoskeleton reorganization	28	4	7.44	2633	0.96231	0.94484
GO:0042078	germ-line stem cell division	41	6	10.89	2824	0.97801	0.94504
GO:0007520	myoblast fusion	49	8	13.02	2698	0.96884	0.94583
GO:0007274	neuromuscular synaptic transmission	70	12	18.6	2807	0.97736	0.95095
GO:0010507	negative regulation of autophagy	23	4	6.11	2140	0.89635	0.95128
GO:0007110	meiosis I cytokinesis	16	2	4.25	2503	0.95162	0.9513
GO:0007200	phospholipase C-activating G-protein coupled receptor signaling pathway	16	2	4.25	2504	0.95162	0.9513
GO:0016239	positive regulation of macroautophagy	16	2	4.25	2505	0.95162	0.9513
GO:0032968	positive regulation of transcription elongation from RNA polymerase II promoter	16	2	4.25	2506	0.95162	0.9513
GO:0035025	positive regulation of Rho protein signal transduction	16	2	4.25	2507	0.95162	0.9513
GO:0035073	pupariation	16	2	4.25	2508	0.95162	0.9513
GO:0035212	cell competition in a multicellular organism	16	2	4.25	2509	0.95162	0.9513
GO:0048803	imaginal disc-derived male genitalia morphogenesis	16	2	4.25	2510	0.95162	0.9513
GO:0015893	drug transport	25	3	6.64	2826	0.97826	0.95145
GO:0035556	intracellular signal transduction	619	122	164.44	3469	0.99999	0.95223
GO:0007059	chromosome segregation	173	34	45.96	2957	0.98698	0.95234
GO:0006099	tricarboxylic acid cycle	32	5	8.5	2520	0.95285	0.9524
GO:0007156	homophilic cell adhesion via plasma membrane adhesion molecules	32	5	8.5	2521	0.95285	0.9524
GO:0007304	chorion-containing eggshell formation	83	9	22.05	3421	0.99989	0.95245
GO:0009953	dorsal/ventral pattern formation	131	18	34.8	3420	0.99988	0.95285
GO:0008407	chaeta morphogenesis	37	6	9.83	2527	0.9534	0.95291
GO:0036335	intestinal stem cell homeostasis	27	4	7.17	2533	0.95353	0.95312
GO:0090090	negative regulation of canonical Wnt signaling pathway	27	4	7.17	2534	0.95353	0.95312
GO:0015711	organic anion transport	133	27	35.33	2646	0.96287	0.95383
GO:0043044	ATP-dependent chromatin remodeling	33	12	8.77	329	0.14083	0.95387
GO:0060271	cilium assembly	60	6	15.94	3362	0.99962	0.95404
GO:0000022	mitotic spindle elongation	10	1	2.66	2540	0.95449	0.95426
GO:0006094	gluconeogenesis	10	1	2.66	2541	0.95449	0.95426
GO:0016080	synaptic vesicle targeting	10	1	2.66	2542	0.95449	0.95426
GO:0030589	pseudocleavage involved in syncytial blastoderm formation	10	1	2.66	2543	0.95449	0.95426
GO:0030723	ovarian fusome organization	10	1	2.66	2544	0.95449	0.95426
GO:0031000	response to caffeine	10	1	2.66	2545	0.95449	0.95426
GO:0033617	mitochondrial respiratory chain complex IV assembly	10	1	2.66	2546	0.95449	0.95426
GO:0035154	terminal cell fate specification, open tracheal system	10	1	2.66	2547	0.95449	0.95426
GO:0035203	regulation of lamellocyte differentiation	10	1	2.66	2548	0.95449	0.95426
GO:0042306	regulation of protein import into nucleus	10	1	2.66	2549	0.95449	0.95426
GO:0042684	cardioblast cell fate commitment	10	1	2.66	2550	0.95449	0.95426
GO:0043488	regulation of mRNA stability	10	1	2.66	2551	0.95449	0.95426
GO:0043506	regulation of JUN kinase activity	10	1	2.66	2552	0.95449	0.95426
GO:0045186	zonula adherens assembly	10	1	2.66	2553	0.95449	0.95426
GO:0045198	establishment of epithelial cell apical/basal polarity	10	1	2.66	2554	0.95449	0.95426
GO:0046534	positive regulation of photoreceptor cell differentiation	10	1	2.66	2555	0.95449	0.95426
GO:0048521	negative regulation of behavior	10	1	2.66	2556	0.95449	0.95426
GO:0048581	negative regulation of post-embryonic development	10	1	2.66	2557	0.95449	0.95426
GO:0070584	mitochondrion morphogenesis	10	1	2.66	2558	0.95449	0.95426
GO:0097035	regulation of membrane lipid distribution	10	1	2.66	2559	0.95449	0.95426
GO:1900371	regulation of purine nucleotide biosynthetic process	10	1	2.66	2560	0.95449	0.95426
GO:2000737	negative regulation of stem cell differentiation	10	1	2.66	2561	0.95449	0.95426
GO:2001257	regulation of cation channel activity	10	1	2.66	2562	0.95449	0.95426
GO:0051299	centrosome separation	22	4	5.84	2004	0.87464	0.95427
GO:0007062	sister chromatid cohesion	24	4	6.38	2206	0.91468	0.95431
GO:0006821	chloride transport	34	5	9.03	2695	0.96816	0.95444
GO:0072002	Malpighian tubule development	57	11	15.14	2319	0.92291	0.95445
GO:0007405	neuroblast proliferation	88	19	23.38	2025	0.88354	0.95447
GO:0034620	cellular response to unfolded protein	28	2	7.44	3246	0.99807	0.95455
GO:0048871	multicellular organismal homeostasis	57	9	15.14	2858	0.98181	0.95461
GO:0045666	positive regulation of neuron differentiation	50	6	13.28	3170	0.99649	0.9547
GO:0043408	regulation of MAPK cascade	141	30	37.46	2453	0.93985	0.95472
GO:0045995	regulation of embryonic development	76	11	20.19	3163	0.99629	0.95485
GO:0051254	positive regulation of RNA metabolic process	351	76	93.25	2960	0.98717	0.95551
GO:0006506	GPI anchor biosynthetic process	27	7	7.17	1174	0.60286	0.9556
GO:0000422	autophagy of mitochondrion	28	6	7.44	1678	0.79378	0.95575
GO:0035050	embryonic heart tube development	22	3	5.84	2590	0.95626	0.95591
GO:0016042	lipid catabolic process	98	21	26.03	2166	0.90089	0.95617
GO:0006464	cellular protein modification process	1071	275	284.52	1524	0.7714	0.95678
GO:0007552	metamorphosis	419	57	111.31	3602	1	0.95685
GO:0007399	nervous system development	1002	164	266.19	3617	1	0.95939
GO:0051568	histone H3-K4 methylation	22	4	5.84	2005	0.87464	0.96227
GO:0007613	memory	105	16	27.89	3252	0.99817	0.96582
GO:0006904	vesicle docking involved in exocytosis	33	7	8.77	1706	0.81299	0.9664
GO:0002027	regulation of heart rate	11	1	2.92	2658	0.9666	0.96641
GO:0006072	glycerol-3-phosphate metabolic process	11	1	2.92	2659	0.9666	0.96641
GO:0006171	cAMP biosynthetic process	11	1	2.92	2660	0.9666	0.96641
GO:0006919	activation of cysteine-type endopeptidase activity involved in apoptotic process	11	1	2.92	2661	0.9666	0.96641
GO:0006964	positive regulation of biosynthetic process of antibacterial peptides active against Gram-negative b...	11	1	2.92	2662	0.9666	0.96641
GO:0007007	inner mitochondrial membrane organization	11	1	2.92	2663	0.9666	0.96641
GO:0007113	endomitotic cell cycle	11	1	2.92	2664	0.9666	0.96641
GO:0007295	growth of a germarium-derived egg chamber	11	1	2.92	2665	0.9666	0.96641
GO:0007380	specification of segmental identity, head	11	1	2.92	2666	0.9666	0.96641
GO:0007394	dorsal closure, elongation of leading edge cells	11	1	2.92	2667	0.9666	0.96641
GO:0007412	axon target recognition	11	1	2.92	2668	0.9666	0.96641
GO:0016201	synaptic target inhibition	11	1	2.92	2669	0.9666	0.96641
GO:0030708	germarium-derived female germ-line cyst encapsulation	11	1	2.92	2670	0.9666	0.96641
GO:0031062	positive regulation of histone methylation	11	1	2.92	2671	0.9666	0.96641
GO:0032231	regulation of actin filament bundle assembly	11	1	2.92	2672	0.9666	0.96641
GO:0035076	ecdysone receptor-mediated signaling pathway	11	1	2.92	2673	0.9666	0.96641
GO:0046959	habituation	11	1	2.92	2674	0.9666	0.96641
GO:0048100	wing disc anterior/posterior pattern formation	11	1	2.92	2675	0.9666	0.96641
GO:0050905	neuromuscular process	11	1	2.92	2676	0.9666	0.96641
GO:0061343	cell adhesion involved in heart morphogenesis	11	1	2.92	2677	0.9666	0.96641
GO:0085029	extracellular matrix assembly	11	1	2.92	2678	0.9666	0.96641
GO:0090254	cell elongation involved in imaginal disc-derived wing morphogenesis	11	1	2.92	2679	0.9666	0.96641
GO:1905954	positive regulation of lipid localization	11	1	2.92	2680	0.9666	0.96641
GO:2000274	regulation of epithelial cell migration, open tracheal system	11	1	2.92	2681	0.9666	0.96641
GO:2001234	negative regulation of apoptotic signaling pathway	11	1	2.92	2682	0.9666	0.96641
GO:0033692	cellular polysaccharide biosynthetic process	18	2	4.78	2716	0.97116	0.96646
GO:0036011	imaginal disc-derived leg segmentation	26	4	6.91	2463	0.94288	0.96647
GO:0060966	regulation of gene silencing by RNA	26	4	6.91	2464	0.94288	0.96647
GO:0019318	hexose metabolic process	49	8	13.02	2699	0.96884	0.9666
GO:0031331	positive regulation of cellular catabolic process	69	9	18.33	3242	0.99801	0.96688
GO:0048565	digestive tract development	91	14	24.18	3166	0.99634	0.96693
GO:0007619	courtship behavior	60	4	15.94	3464	0.99998	0.96704
GO:0008595	anterior/posterior axis specification, embryo	119	19	31.61	3240	0.998	0.96709
GO:0009880	embryonic pattern specification	199	31	52.87	3439	0.99994	0.96768
GO:0048749	compound eye development	335	50	89	3536	1	0.9677
GO:0045214	sarcomere organization	34	5	9.03	2696	0.96816	0.96782
GO:0007525	somatic muscle development	77	14	20.46	2697	0.96854	0.9681
GO:0042981	regulation of apoptotic process	203	42	53.93	2834	0.97944	0.96837
GO:0016321	female meiosis chromosome segregation	29	4	7.7	2702	0.96954	0.96924
GO:0032482	Rab protein signal transduction	41	7	10.89	2490	0.94619	0.96926
GO:0055085	transmembrane transport	474	98	125.92	3305	0.99909	0.96967
GO:0050804	modulation of chemical synaptic transmission	99	16	26.3	3130	0.9952	0.9699
GO:0007160	cell-matrix adhesion	18	2	4.78	2717	0.97116	0.97094
GO:0007279	pole cell formation	18	2	4.78	2718	0.97116	0.97094
GO:0009996	negative regulation of cell fate specification	18	2	4.78	2719	0.97116	0.97094
GO:0032436	positive regulation of proteasomal ubiquitin-dependent protein catabolic process	18	2	4.78	2720	0.97116	0.97094
GO:0035099	hemocyte migration	18	2	4.78	2721	0.97116	0.97094
GO:0046529	imaginal disc fusion, thorax closure	18	2	4.78	2722	0.97116	0.97094
GO:0007009	plasma membrane organization	24	3	6.38	2741	0.97247	0.97099
GO:0030510	regulation of BMP signaling pathway	32	4	8.5	2902	0.98419	0.97107
GO:0050770	regulation of axonogenesis	43	6	11.42	2916	0.98514	0.97114
GO:0030100	regulation of endocytosis	53	8	14.08	2908	0.9846	0.97118
GO:0007417	central nervous system development	223	32	59.24	3498	1	0.97138
GO:0008406	gonad development	49	10	13.02	2011	0.87513	0.9722
GO:0001737	establishment of imaginal disc-derived wing hair orientation	24	3	6.38	2742	0.97247	0.97223
GO:0070868	heterochromatin organization involved in chromatin silencing	24	3	6.38	2743	0.97247	0.97223
GO:0070588	calcium ion transmembrane transport	31	4	8.24	2843	0.98027	0.9723
GO:0045165	cell fate commitment	287	49	76.24	3452	0.99996	0.97275
GO:0050877	nervous system process	428	88	113.7	3281	0.99873	0.97411
GO:0000122	negative regulation of transcription by RNA polymerase II	154	31	40.91	2768	0.97511	0.9745
GO:0007097	nuclear migration	30	4	7.97	2774	0.97545	0.9752
GO:0000916	actomyosin contractile ring contraction	12	1	3.19	2777	0.97548	0.97533
GO:0006744	ubiquinone biosynthetic process	12	1	3.19	2778	0.97548	0.97533
GO:0006835	dicarboxylic acid transport	12	1	3.19	2779	0.97548	0.97533
GO:0007509	mesoderm migration involved in gastrulation	12	1	3.19	2780	0.97548	0.97533
GO:0008069	dorsal/ventral axis specification, ovarian follicular epithelium	12	1	3.19	2781	0.97548	0.97533
GO:0010107	potassium ion import	12	1	3.19	2782	0.97548	0.97533
GO:0019432	triglyceride biosynthetic process	12	1	3.19	2783	0.97548	0.97533
GO:0034587	piRNA metabolic process	12	1	3.19	2784	0.97548	0.97533
GO:0045314	regulation of compound eye photoreceptor development	12	1	3.19	2785	0.97548	0.97533
GO:0045676	regulation of R7 cell differentiation	12	1	3.19	2786	0.97548	0.97533
GO:0009062	fatty acid catabolic process	43	8	11.42	2282	0.91736	0.97539
GO:0072593	reactive oxygen species metabolic process	32	5	8.5	2522	0.95285	0.9754
GO:1902692	regulation of neuroblast proliferation	44	8	11.69	2336	0.92922	0.97541
GO:0038202	TORC1 signaling	38	6	10.1	2620	0.9612	0.97543
GO:0017157	regulation of exocytosis	26	2	6.91	3174	0.99664	0.97547
GO:0007507	heart development	97	14	25.77	3278	0.99869	0.97585
GO:0007423	sensory organ development	427	65	113.44	3561	1	0.97591
GO:0035293	chitin-based larval cuticle pattern formation	19	2	5.05	2811	0.97782	0.97764
GO:0042675	compound eye cone cell differentiation	19	2	5.05	2812	0.97782	0.97764
GO:0048814	regulation of dendrite morphogenesis	29	4	7.7	2703	0.96954	0.97768
GO:0035317	imaginal disc-derived wing hair organization	43	5	11.42	3132	0.99524	0.97784
GO:0001708	cell fate specification	75	12	19.92	2996	0.98974	0.97793
GO:0042051	compound eye photoreceptor development	94	13	24.97	3306	0.99909	0.97817
GO:0007427	epithelial cell migration, open tracheal system	36	4	9.56	3097	0.99363	0.97818
GO:0007416	synapse assembly	162	29	43.04	3173	0.99663	0.9783
GO:0009636	response to toxic substance	131	25	34.8	2875	0.98272	0.97848
GO:0007498	mesoderm development	84	11	22.32	3312	0.99916	0.97868
GO:0007424	open tracheal system development	221	38	58.71	3378	0.99968	0.97983
GO:0045475	locomotor rhythm	65	11	17.27	2803	0.97631	0.98155
GO:0006536	glutamate metabolic process	13	1	3.45	2860	0.98201	0.98189
GO:0007428	primary branching, open tracheal system	13	1	3.45	2861	0.98201	0.98189
GO:0030720	oocyte localization involved in germarium-derived egg chamber formation	13	1	3.45	2862	0.98201	0.98189
GO:0035289	posterior head segmentation	13	1	3.45	2863	0.98201	0.98189
[truncated: 1,958 more rows]

## Sheet: female_down
GO.ID	Term	Annotated	Significant	Expected	Rank in Fisher.classic	Fisher.classic	Fisher.weight01
GO:0006120	mitochondrial electron transport, NADH to ubiquinone	29	16	5.06	28	4.6e-06	4.3e-06
GO:0006013	mannose metabolic process	9	7	1.57	63	0.00013	0.00012
GO:0008049	male courtship behavior	49	20	8.54	56	9.7e-05	0.00051
GO:0015991	ATP hydrolysis coupled proton transport	23	11	4.01	104	0.00076	0.00072
GO:0005977	glycogen metabolic process	26	13	4.53	65	0.00014	0.00079
GO:0045792	negative regulation of cell size	20	10	3.49	112	0.00085	0.00081
GO:0040015	negative regulation of multicellular organism growth	9	6	1.57	121	0.00144	0.0014
GO:0006099	tricarboxylic acid cycle	32	13	5.58	125	0.00169	0.0016
GO:0007283	spermatogenesis	171	48	29.81	83	0.00033	0.00207
GO:0005978	glycogen biosynthetic process	7	5	1.22	133	0.00246	0.00239
GO:0007477	notum development	7	5	1.22	134	0.00246	0.00239
GO:0046680	response to DDT	7	5	1.22	135	0.00246	0.00239
GO:0040008	regulation of growth	277	67	48.29	132	0.00233	0.00257
GO:0006914	autophagy	155	37	27.02	380	0.02455	0.00269
GO:0006633	fatty acid biosynthetic process	34	12	5.93	224	0.00952	0.00274
GO:0001932	regulation of protein phosphorylation	224	49	39.05	536	0.04865	0.0038
GO:0019320	hexose catabolic process	5	4	0.87	162	0.00396	0.00388
GO:2001243	negative regulation of intrinsic apoptotic signaling pathway	5	4	0.87	163	0.00396	0.00388
GO:0007300	ovarian nurse cell to oocyte transport	30	8	5.23	947	0.1379	0.00388
GO:0070588	calcium ion transmembrane transport	31	12	5.4	165	0.00407	0.0044
GO:0042593	glucose homeostasis	34	13	5.93	150	0.00321	0.0049
GO:0007591	molting cycle, chitin-based cuticle	87	24	15.17	266	0.01196	0.00502
GO:0019722	calcium-mediated signaling	20	8	3.49	283	0.01458	0.00512
GO:0007309	oocyte axis specification	119	30	20.75	333	0.01987	0.00512
GO:0006936	muscle contraction	25	9	4.36	346	0.0206	0.00546
GO:0048148	behavioral response to cocaine	8	5	1.39	184	0.00562	0.00548
GO:0055075	potassium ion homeostasis	8	5	1.39	185	0.00562	0.00548
GO:1901739	regulation of myoblast fusion	8	5	1.39	186	0.00562	0.00548
GO:0007369	gastrulation	72	15	12.55	1413	0.26484	0.0055
GO:0000915	actomyosin contractile ring assembly	21	9	3.66	191	0.00572	0.0055
GO:0048149	behavioral response to ethanol	49	16	8.54	204	0.00702	0.00663
GO:0008340	determination of adult lifespan	139	36	24.23	208	0.00742	0.00676
GO:0015986	ATP synthesis coupled proton transport	18	8	3.14	200	0.00701	0.00676
GO:0030431	sleep	74	21	12.9	275	0.01301	0.00692
GO:0008355	olfactory learning	42	14	7.32	221	0.0093	0.00694
GO:0006517	protein deglycosylation	15	7	2.62	213	0.00845	0.00818
GO:0051865	protein autoubiquitination	15	7	2.62	214	0.00845	0.00818
GO:0010107	potassium ion import	12	6	2.09	231	0.00987	0.00959
GO:0018023	peptidyl-lysine trimethylation	12	6	2.09	232	0.00987	0.00959
GO:0031647	regulation of protein stability	49	16	8.54	205	0.00702	0.00981
GO:0006096	glycolytic process	19	8	3.31	247	0.01029	0.00994
GO:0006655	phosphatidylglycerol biosynthetic process	6	4	1.05	237	0.01024	0.01003
GO:0035207	negative regulation of hemocyte proliferation	6	4	1.05	238	0.01024	0.01003
GO:0046701	insecticide catabolic process	6	4	1.05	239	0.01024	0.01003
GO:0055078	sodium ion homeostasis	6	4	1.05	240	0.01024	0.01003
GO:0061883	clathrin-dependent endocytosis involved in vitellogenesis	6	4	1.05	241	0.01024	0.01003
GO:1902410	mitotic cytokinetic process	6	4	1.05	242	0.01024	0.01003
GO:2000370	positive regulation of clathrin-dependent endocytosis	6	4	1.05	243	0.01024	0.01003
GO:0035204	negative regulation of lamellocyte differentiation	9	5	1.57	252	0.01084	0.01057
GO:0043052	thermotaxis	16	7	2.79	272	0.01279	0.0124
GO:0048803	imaginal disc-derived male genitalia morphogenesis	16	7	2.79	273	0.01279	0.0124
GO:0045610	regulation of hemocyte differentiation	26	11	4.53	141	0.0026	0.01508
GO:0035725	sodium ion transmembrane transport	13	6	2.27	293	0.01566	0.01523
GO:0030004	cellular monovalent inorganic cation homeostasis	37	18	6.45	35	1.2e-05	0.01775
GO:0051225	spindle assembly	62	16	10.81	596	0.06248	0.01789
GO:0051452	intracellular pH reduction	17	8	2.96	172	0.00459	0.01799
GO:1901992	positive regulation of mitotic cell cycle phase transition	17	7	2.96	311	0.01854	0.01803
GO:0034620	cellular response to unfolded protein	28	10	4.88	295	0.01589	0.01806
GO:1902882	regulation of response to oxidative stress	12	5	2.09	508	0.04316	0.01807
GO:0045005	DNA-dependent DNA replication maintenance of fidelity	10	5	1.74	315	0.0186	0.01816
GO:0048800	antennal morphogenesis	10	5	1.74	316	0.0186	0.01816
GO:0070584	mitochondrion morphogenesis	10	5	1.74	317	0.0186	0.01816
GO:0051489	regulation of filopodium assembly	31	6	5.4	1990	0.46126	0.01831
GO:0007291	sperm individualization	37	12	6.45	329	0.01942	0.0186
GO:0000209	protein polyubiquitination	69	19	12.03	376	0.02409	0.01959
GO:0007616	long-term memory	68	19	11.86	360	0.02074	0.0196
GO:0032482	Rab protein signal transduction	41	12	7.15	504	0.04249	0.01979
GO:0008293	torso signaling pathway	25	9	4.36	347	0.0206	0.01988
GO:0030258	lipid modification	79	20	13.77	537	0.04867	0.02002
GO:0006637	acyl-CoA metabolic process	35	10	6.1	645	0.0706	0.02014
GO:0000186	activation of MAPKK activity	7	4	1.22	352	0.02062	0.0202
GO:0042381	hemolymph coagulation	7	4	1.22	353	0.02062	0.0202
GO:0042771	intrinsic apoptotic signaling pathway in response to DNA damage by p53 class mediator	7	4	1.22	354	0.02062	0.0202
GO:0006893	Golgi to plasma membrane transport	23	5	4.01	1770	0.37262	0.0203
GO:0048477	oogenesis	554	124	96.58	116	0.00118	0.02033
GO:0043066	negative regulation of apoptotic process	106	33	18.48	89	0.00038	0.02095
GO:0006090	pyruvate metabolic process	33	14	5.75	99	0.00068	0.02245
GO:0002385	mucosal immune response	14	6	2.44	367	0.02344	0.02281
GO:0034198	cellular response to amino acid starvation	14	6	2.44	368	0.02344	0.02281
GO:0006511	ubiquitin-dependent protein catabolic process	220	48	38.35	549	0.05259	0.02361
GO:0030100	regulation of endocytosis	53	18	9.24	145	0.0027	0.02465
GO:0007088	regulation of mitotic nuclear division	60	17	10.46	378	0.02433	0.02486
GO:0007140	male meiotic nuclear division	64	16	11.16	685	0.07975	0.02502
GO:0055114	oxidation-reduction process	458	123	79.85	17	1.4e-07	0.02574
GO:0000422	autophagy of mitochondrion	28	10	4.88	296	0.01589	0.02584
GO:0042331	phototaxis	22	8	3.84	401	0.02679	0.02594
GO:0055085	transmembrane transport	474	111	82.64	90	0.00038	0.02599
GO:0006006	glucose metabolic process	34	9	5.93	896	0.12416	0.02862
GO:0006284	base-excision repair	11	5	1.92	418	0.02929	0.02862
GO:0007113	endomitotic cell cycle	11	5	1.92	419	0.02929	0.02862
GO:0046856	phosphatidylinositol dephosphorylation	11	5	1.92	420	0.02929	0.02862
GO:0090303	positive regulation of wound healing	11	5	1.92	421	0.02929	0.02862
GO:0008284	positive regulation of cell proliferation	62	17	10.81	439	0.03302	0.02924
GO:0035239	tube morphogenesis	452	90	78.8	728	0.08754	0.02957
GO:0090092	regulation of transmembrane receptor protein serine/threonine kinase signaling pathway	53	15	9.24	446	0.03349	0.02984
GO:0009110	vitamin biosynthetic process	8	5	1.39	187	0.00562	0.02994
GO:0042743	hydrogen peroxide metabolic process	9	5	1.57	253	0.01084	0.02995
GO:0045862	positive regulation of proteolysis	52	12	9.07	1115	0.18355	0.02997
GO:0051231	spindle elongation	12	5	2.09	509	0.04316	0.02997
GO:0046039	GTP metabolic process	7	3	1.22	786	0.10677	0.03002
GO:0005980	glycogen catabolic process	13	4	2.27	1082	0.17814	0.03002
GO:0044839	cell cycle G2/M phase transition	37	8	6.45	1578	0.31124	0.03003
GO:1903322	positive regulation of protein modification by small protein conjugation or removal	16	4	2.79	1548	0.30017	0.03005
GO:0051303	establishment of chromosome localization	23	5	4.01	1771	0.37262	0.03005
GO:0046834	lipid phosphorylation	19	4	3.31	1918	0.42876	0.03007
GO:0043900	regulation of multi-organism process	123	22	21.44	2078	0.48452	0.03007
GO:2001056	positive regulation of cysteine-type endopeptidase activity	22	4	3.84	2226	0.55031	0.03009
GO:0043297	apical junction assembly	57	9	9.94	2638	0.6823	0.03014
GO:0051453	regulation of intracellular pH	32	14	5.58	95	0.00046	0.03204
GO:0032504	multicellular organism reproduction	952	219	165.97	24	1.7e-06	0.03235
GO:0006891	intra-Golgi vesicle-mediated transport	27	9	4.71	447	0.03412	0.03298
GO:0035317	imaginal disc-derived wing hair organization	43	13	7.5	407	0.02754	0.03374
GO:0045433	male courtship behavior, veined wing generated song production	19	7	3.31	449	0.03496	0.03397
GO:0007498	mesoderm development	84	22	14.64	411	0.02807	0.03436
GO:0006875	cellular metal ion homeostasis	75	21	13.08	287	0.01519	0.03447
GO:0051345	positive regulation of hydrolase activity	93	20	16.21	1103	0.18152	0.03482
GO:0009649	entrainment of circadian clock	18	6	3.14	674	0.0781	0.03491
GO:0006011	UDP-glucose metabolic process	8	4	1.39	451	0.03562	0.03493
GO:0046673	negative regulation of compound eye retinal cell programmed cell death	8	4	1.39	452	0.03562	0.03493
GO:1901216	positive regulation of neuron death	8	4	1.39	453	0.03562	0.03493
GO:1903578	regulation of ATP metabolic process	8	4	1.39	454	0.03562	0.03493
GO:1904262	negative regulation of TORC1 signaling	8	4	1.39	455	0.03562	0.03493
GO:0010529	negative regulation of transposition	14	5	2.44	697	0.08086	0.03494
GO:0046843	dorsal appendage formation	45	13	7.85	478	0.03931	0.0377
GO:0009266	response to temperature stimulus	117	31	20.4	217	0.00882	0.03875
GO:1905039	carboxylic acid transmembrane transport	38	10	6.62	855	0.11204	0.03933
GO:0031396	regulation of protein ubiquitination	29	8	5.06	866	0.11823	0.03936
GO:0061982	meiosis I cell cycle process	93	19	16.21	1391	0.25911	0.03937
GO:0006085	acetyl-CoA biosynthetic process	5	3	0.87	480	0.04005	0.03943
GO:0006108	malate metabolic process	5	3	0.87	481	0.04005	0.03943
GO:0006690	icosanoid metabolic process	5	3	0.87	482	0.04005	0.03943
GO:0006777	Mo-molybdopterin cofactor biosynthetic process	5	3	0.87	483	0.04005	0.03943
GO:0006995	cellular response to nitrogen starvation	5	3	0.87	484	0.04005	0.03943
GO:0007176	regulation of epidermal growth factor-activated receptor activity	5	3	0.87	485	0.04005	0.03943
GO:0007625	grooming behavior	5	3	0.87	486	0.04005	0.03943
GO:0016336	establishment or maintenance of polarity of larval imaginal disc epithelium	5	3	0.87	487	0.04005	0.03943
GO:0016926	protein desumoylation	5	3	0.87	488	0.04005	0.03943
GO:0035736	cell proliferation involved in compound eye morphogenesis	5	3	0.87	489	0.04005	0.03943
GO:0042685	cardioblast cell fate specification	5	3	0.87	490	0.04005	0.03943
GO:0051890	regulation of cardioblast differentiation	5	3	0.87	491	0.04005	0.03943
GO:0090382	phagosome maturation	5	3	0.87	492	0.04005	0.03943
GO:0000266	mitochondrial fission	12	4	2.09	954	0.1419	0.03944
GO:0007019	microtubule depolymerization	19	4	3.31	1919	0.42876	0.03954
GO:0007005	mitochondrion organization	166	44	28.94	129	0.00205	0.04147
GO:0001745	compound eye morphogenesis	273	59	47.59	500	0.041	0.04195
GO:0032507	maintenance of protein location in cell	29	10	5.06	344	0.02056	0.04197
GO:2000027	regulation of organ morphogenesis	81	18	14.12	1026	0.15956	0.04208
GO:0007482	haltere development	12	5	2.09	510	0.04316	0.04221
GO:0072553	terminal button organization	36	9	6.28	1033	0.16256	0.04223
GO:0007435	salivary gland morphogenesis	93	27	16.21	159	0.00377	0.04319
GO:1902476	chloride transmembrane transport	24	8	4.18	522	0.0447	0.04336
GO:0006874	cellular calcium ion homeostasis	42	12	7.32	541	0.0504	0.04447
GO:0007040	lysosome organization	16	6	2.79	527	0.04581	0.04468
GO:0042023	DNA endoreduplication	23	7	4.01	732	0.09087	0.04471
GO:0008152	metabolic process	4778	831	832.99	2261	0.56036	0.05208
GO:0009416	response to light stimulus	136	34	23.71	292	0.01565	0.05339
GO:0046667	compound eye retinal cell programmed cell death	27	10	4.71	269	0.01205	0.05405
GO:0005991	trehalose metabolic process	9	4	1.57	559	0.05545	0.05442
GO:0007395	dorsal closure, spreading of leading edge cells	9	4	1.57	560	0.05545	0.05442
GO:0048738	cardiac muscle tissue development	9	4	1.57	561	0.05545	0.05442
GO:0060361	flight	9	4	1.57	562	0.05545	0.05442
GO:0019216	regulation of lipid metabolic process	36	8	6.28	1489	0.28365	0.05451
GO:0072089	stem cell proliferation	106	20	18.48	1802	0.38665	0.05453
GO:0045860	positive regulation of protein kinase activity	56	11	9.76	1789	0.38378	0.05457
GO:0045886	negative regulation of synaptic growth at neuromuscular junction	43	12	7.5	578	0.05925	0.05708
GO:0009108	coenzyme biosynthetic process	77	28	13.42	47	5.3e-05	0.05718
GO:0007525	somatic muscle development	77	17	13.42	1067	0.17518	0.05747
GO:0006406	mRNA export from nucleus	34	12	5.93	225	0.00952	0.05869
GO:0035017	cuticle pattern formation	32	10	5.58	497	0.04044	0.0588
GO:0045807	positive regulation of endocytosis	30	10	5.23	396	0.02615	0.05893
GO:0007035	vacuolar acidification	13	5	2.27	586	0.06035	0.05907
GO:0043401	steroid hormone mediated signaling pathway	27	7	4.71	1071	0.178	0.05914
GO:0071711	basement membrane organization	17	6	2.96	590	0.06069	0.05924
GO:0040003	chitin-based cuticle development	97	22	16.91	851	0.11053	0.06338
GO:0070374	positive regulation of ERK1 and ERK2 cascade	53	14	9.24	602	0.06611	0.0635
GO:0006979	response to oxidative stress	117	31	20.4	218	0.00882	0.0672
GO:0007472	wing disc morphogenesis	253	54	44.11	583	0.05951	0.06774
GO:2001234	negative regulation of apoptotic signaling pathway	11	7	1.92	111	0.00083	0.06842
GO:0035088	establishment or maintenance of apical/basal cell polarity	40	11	6.97	665	0.07577	0.06855
GO:0002684	positive regulation of immune system process	78	17	13.6	1132	0.1898	0.06863
GO:0007620	copulation	12	5	2.09	511	0.04316	0.0687
GO:0061025	membrane fusion	85	17	14.82	1573	0.30632	0.06878
GO:0006012	galactose metabolic process	6	3	1.05	617	0.06985	0.06882
GO:0006884	cell volume homeostasis	6	3	1.05	618	0.06985	0.06882
GO:0007630	jump response	6	3	1.05	619	0.06985	0.06882
GO:0030336	negative regulation of cell migration	6	3	1.05	620	0.06985	0.06882
GO:0030382	sperm mitochondrion organization	6	3	1.05	621	0.06985	0.06882
GO:0032528	microvillus organization	6	3	1.05	622	0.06985	0.06882
GO:0033539	fatty acid beta-oxidation using acyl-CoA dehydrogenase	6	3	1.05	623	0.06985	0.06882
GO:0033559	unsaturated fatty acid metabolic process	6	3	1.05	624	0.06985	0.06882
GO:0034453	microtubule anchoring	6	3	1.05	625	0.06985	0.06882
GO:0035292	specification of segmental identity, trunk	6	3	1.05	626	0.06985	0.06882
GO:0042364	water-soluble vitamin biosynthetic process	6	3	1.05	627	0.06985	0.06882
GO:0043392	negative regulation of DNA binding	6	3	1.05	628	0.06985	0.06882
GO:0048087	positive regulation of developmental pigmentation	6	3	1.05	629	0.06985	0.06882
GO:0048526	imaginal disc-derived wing expansion	6	3	1.05	630	0.06985	0.06882
GO:0051881	regulation of mitochondrial membrane potential	6	3	1.05	631	0.06985	0.06882
GO:0061099	negative regulation of protein tyrosine kinase activity	6	3	1.05	632	0.06985	0.06882
GO:0070873	regulation of glycogen metabolic process	6	3	1.05	633	0.06985	0.06882
GO:0071329	cellular response to sucrose stimulus	6	3	1.05	634	0.06985	0.06882
GO:0090098	positive regulation of decapentaplegic signaling pathway	6	3	1.05	635	0.06985	0.06882
GO:0046011	regulation of oskar mRNA translation	14	4	2.44	1254	0.21705	0.06887
GO:0042446	hormone biosynthetic process	27	6	4.71	1603	0.32697	0.0689
GO:0050684	regulation of mRNA processing	94	17	16.39	2016	0.47616	0.06898
GO:1901605	alpha-amino acid metabolic process	91	14	15.86	2949	0.73886	0.06931
GO:0002168	instar larval development	62	20	10.81	151	0.00322	0.07055
GO:0008654	phospholipid biosynthetic process	68	21	11.86	176	0.00459	0.07056
GO:0048675	axon extension	48	9	8.37	1995	0.46353	0.07256
GO:0009968	negative regulation of signal transduction	278	59	48.47	566	0.05577	0.0726
GO:0008103	oocyte microtubule cytoskeleton polarization	18	6	3.14	675	0.0781	0.07631
GO:0032436	positive regulation of proteasomal ubiquitin-dependent protein catabolic process	18	6	3.14	676	0.0781	0.07631
GO:0050803	regulation of synapse structure or activity	156	39	27.2	235	0.01016	0.07687
GO:0022900	electron transport chain	71	28	12.38	32	9.1e-06	0.07814
GO:0019915	lipid storage	45	12	7.85	686	0.0799	0.07826
GO:0072002	Malpighian tubule development	57	13	9.94	1111	0.18238	0.07844
GO:0006641	triglyceride metabolic process	29	8	5.06	867	0.11823	0.07847
GO:0030198	extracellular matrix organization	41	13	7.15	314	0.01857	0.07853
GO:0016080	synaptic vesicle targeting	10	4	1.74	688	0.08001	0.0786
GO:0048142	germarium-derived cystoblast division	10	4	1.74	689	0.08001	0.0786
GO:0048871	multicellular organismal homeostasis	57	11	9.94	1840	0.40783	0.0788
GO:0035075	response to ecdysone	44	11	7.67	922	0.13132	0.07905
GO:0016358	dendrite development	155	33	27.02	889	0.12215	0.07917
GO:0071897	DNA biosynthetic process	37	12	6.45	330	0.01942	0.07924
GO:0032784	regulation of DNA-templated transcription, elongation	26	9	4.53	400	0.02676	0.07936
GO:0055002	striated muscle cell development	61	15	10.63	761	0.09861	0.07936
GO:0031330	negative regulation of cellular catabolic process	33	10	5.75	539	0.04928	0.07938
GO:0008589	regulation of smoothened signaling pathway	36	10	6.28	712	0.08314	0.07944
GO:2000241	regulation of reproductive process	75	16	13.08	1280	0.22476	0.07952
GO:0033046	negative regulation of sister chromatid segregation	18	6	3.14	677	0.0781	0.07953
GO:0033301	cell cycle comprising mitosis without cytokinesis	24	7	4.18	842	0.10988	0.07954
GO:0007368	determination of left/right symmetry	8	4	1.39	456	0.03562	0.07956
GO:0060322	head development	122	23	21.27	1779	0.37492	0.07964
GO:0051899	membrane depolarization	9	3	1.57	1146	0.19648	0.07969
GO:0001672	regulation of chromatin assembly or disassembly	15	4	2.62	1371	0.25795	0.07969
GO:0048598	embryonic morphogenesis	206	37	35.91	1958	0.44909	0.0797
GO:0046068	cGMP metabolic process	17	4	2.96	1632	0.34309	0.07973
GO:0002118	aggressive behavior	14	3	2.44	1965	0.45175	0.07978
GO:0055088	lipid homeostasis	66	15	11.51	1038	0.1639	0.08141
GO:0008347	glial cell migration	27	8	4.71	715	0.08376	0.08148
GO:1901576	organic substance biosynthetic process	2120	356	369.6	3222	0.82695	0.08159
GO:0000226	microtubule cytoskeleton organization	290	64	50.56	365	0.02295	0.08556
GO:0000902	cell morphogenesis	527	110	91.88	332	0.01972	0.09219
GO:0007268	chemical synaptic transmission	266	53	46.37	1019	0.15693	0.09368
GO:0022416	chaeta development	74	17	12.9	933	0.13503	0.09382
GO:0072659	protein localization to plasma membrane	39	9	6.8	1291	0.22911	0.09597
GO:0090263	positive regulation of canonical Wnt signaling pathway	28	8	4.88	766	0.10016	0.09753
GO:0007018	microtubule-based movement	103	20	17.96	1617	0.33497	0.09785
GO:0046579	positive regulation of Ras protein signal transduction	58	14	10.11	884	0.12165	0.09801
GO:0009058	biosynthetic process	2146	365	374.13	2948	0.73874	0.09936
GO:0007528	neuromuscular junction development	167	40	29.11	323	0.01895	0.10112
GO:0035071	salivary gland cell autophagic cell death	30	9	5.23	598	0.06413	0.10218
GO:0042026	protein refolding	15	5	2.62	778	0.10458	0.10254
GO:0021782	glial cell development	30	7	5.23	1393	0.25963	0.10269
GO:0071695	anatomical structure maturation	60	15	10.46	729	0.08785	0.10476
GO:0048515	spermatid differentiation	74	17	12.9	934	0.13503	0.10484
GO:0045840	positive regulation of mitotic nuclear division	14	5	2.44	698	0.08086	0.10514
GO:0006121	mitochondrial electron transport, succinate to ubiquinone	7	3	1.22	787	0.10677	0.10529
GO:0007141	male meiosis I	7	3	1.22	788	0.10677	0.10529
GO:0016242	negative regulation of macroautophagy	7	3	1.22	789	0.10677	0.10529
GO:0034126	positive regulation of MyD88-dependent toll-like receptor signaling pathway	7	3	1.22	790	0.10677	0.10529
GO:0035190	syncytial nuclear migration	7	3	1.22	791	0.10677	0.10529
GO:0035331	negative regulation of hippo signaling	7	3	1.22	792	0.10677	0.10529
GO:0036159	inner dynein arm assembly	7	3	1.22	793	0.10677	0.10529
GO:0042744	hydrogen peroxide catabolic process	7	3	1.22	794	0.10677	0.10529
GO:0044130	negative regulation of growth of symbiont in host	7	3	1.22	795	0.10677	0.10529
GO:0045199	maintenance of epithelial cell apical/basal polarity	7	3	1.22	796	0.10677	0.10529
GO:0045313	rhabdomere membrane biogenesis	7	3	1.22	797	0.10677	0.10529
GO:0048312	intracellular distribution of mitochondria	7	3	1.22	798	0.10677	0.10529
GO:0048567	ectodermal digestive tract morphogenesis	7	3	1.22	799	0.10677	0.10529
GO:0097120	receptor localization to synapse	7	3	1.22	800	0.10677	0.10529
GO:2000104	negative regulation of DNA-dependent DNA replication	7	3	1.22	801	0.10677	0.10529
GO:0045455	ecdysteroid metabolic process	26	6	4.53	1505	0.29386	0.10534
GO:0002027	regulation of heart rate	11	4	1.92	825	0.10899	0.10716
GO:0007007	inner mitochondrial membrane organization	11	4	1.92	826	0.10899	0.10716
GO:0007436	larval salivary gland morphogenesis	11	4	1.92	827	0.10899	0.10716
GO:0016973	poly(A)+ mRNA export from nucleus	11	4	1.92	828	0.10899	0.10716
GO:0030708	germarium-derived female germ-line cyst encapsulation	11	4	1.92	829	0.10899	0.10716
GO:0040034	regulation of development, heterochronic	11	4	1.92	830	0.10899	0.10716
GO:0051085	chaperone cofactor-dependent protein refolding	11	4	1.92	831	0.10899	0.10716
GO:0060025	regulation of synaptic activity	11	4	1.92	832	0.10899	0.10716
GO:0007465	R7 cell fate commitment	18	5	3.14	1136	0.19248	0.1072
GO:0036099	female germ-line stem cell population maintenance	24	7	4.18	843	0.10988	0.10726
GO:0045451	pole plasm oskar mRNA localization	49	11	8.54	1278	0.22424	0.10737
GO:0009408	response to heat	75	19	13.08	552	0.05338	0.11111
GO:0030307	positive regulation of cell growth	42	10	7.32	1119	0.18437	0.11532
GO:0007476	imaginal disc-derived wing morphogenesis	247	51	43.06	777	0.10418	0.11592
GO:0006629	lipid metabolic process	402	89	70.08	210	0.00767	0.11721
GO:0006890	retrograde vesicle-mediated transport, Golgi to ER	20	6	3.49	877	0.12034	0.11778
GO:0007362	terminal region determination	20	6	3.49	878	0.12034	0.11778
GO:0007552	metamorphosis	419	90	73.05	304	0.01644	0.124
GO:0007059	chromosome segregation	173	33	30.16	1585	0.31204	0.12859
GO:0007110	meiosis I cytokinesis	16	5	2.79	912	0.13129	0.12884
GO:0016059	deactivation of rhodopsin mediated signaling	16	5	2.79	913	0.13129	0.12884
GO:0016082	synaptic vesicle priming	16	5	2.79	914	0.13129	0.12884
GO:0016239	positive regulation of macroautophagy	16	5	2.79	915	0.13129	0.12884
GO:0032968	positive regulation of transcription elongation from RNA polymerase II promoter	16	5	2.79	916	0.13129	0.12884
GO:0010506	regulation of autophagy	92	21	16.04	853	0.11106	0.13356
GO:0050821	protein stabilization	30	8	5.23	948	0.1379	0.13451
GO:0044237	cellular metabolic process	4137	728	721.24	1743	0.35569	0.13766
GO:0007052	mitotic spindle organization	68	16	11.86	893	0.12285	0.13839
GO:0007160	cell-matrix adhesion	18	6	3.14	678	0.0781	0.13936
GO:0035249	synaptic transmission, glutamatergic	19	6	3.31	757	0.09802	0.13941
GO:0007298	border follicle cell migration	116	25	20.22	983	0.14624	0.13954
GO:0000916	actomyosin contractile ring contraction	12	4	2.09	955	0.1419	0.13963
GO:0006623	protein targeting to vacuole	12	4	2.09	956	0.1419	0.13963
GO:0006744	ubiquinone biosynthetic process	12	4	2.09	957	0.1419	0.13963
GO:0007016	cytoskeletal anchoring at plasma membrane	12	4	2.09	958	0.1419	0.13963
GO:0007509	mesoderm migration involved in gastrulation	12	4	2.09	959	0.1419	0.13963
GO:0008069	dorsal/ventral axis specification, ovarian follicular epithelium	12	4	2.09	960	0.1419	0.13963
GO:0008333	endosome to lysosome transport	12	4	2.09	961	0.1419	0.13963
GO:0031440	regulation of mRNA 3'-end processing	12	4	2.09	962	0.1419	0.13963
GO:0007432	salivary gland boundary specification	20	5	3.49	1403	0.26151	0.13974
GO:0007517	muscle organ development	92	24	16.04	374	0.02355	0.13985
GO:0048638	regulation of developmental growth	201	43	35.04	709	0.08259	0.14001
GO:0000280	nuclear division	271	55	47.25	873	0.11978	0.14003
GO:0031331	positive regulation of cellular catabolic process	69	16	12.03	935	0.13541	0.14078
GO:0071616	acyl-CoA biosynthetic process	9	5	1.57	254	0.01084	0.14089
GO:0043523	regulation of neuron apoptotic process	21	7	3.66	573	0.05888	0.1409
GO:0007562	eclosion	17	6	2.96	591	0.06069	0.14096
GO:0006109	regulation of carbohydrate metabolic process	24	7	4.18	844	0.10988	0.141
GO:0046058	cAMP metabolic process	15	5	2.62	779	0.10458	0.14107
GO:0040012	regulation of locomotion	56	12	9.76	1412	0.26196	0.14109
GO:0000731	DNA synthesis involved in DNA repair	11	4	1.92	833	0.10899	0.14113
GO:0006301	postreplication repair	11	4	1.92	834	0.10899	0.14113
GO:0007414	axonal defasciculation	11	4	1.92	835	0.10899	0.14113
GO:0055081	anion homeostasis	11	4	1.92	836	0.10899	0.14113
GO:0010565	regulation of cellular ketone metabolic process	9	3	1.57	1147	0.19648	0.14125
GO:0043506	regulation of JUN kinase activity	10	3	1.74	1338	0.24639	0.14128
GO:0051663	oocyte nucleus localization involved in oocyte dorsal/ventral axis specification	10	3	1.74	1339	0.24639	0.14128
GO:0006024	glycosaminoglycan biosynthetic process	12	3	2.09	1652	0.34992	0.14134
GO:0051438	regulation of ubiquitin-protein transferase activity	12	3	2.09	1653	0.34992	0.14134
GO:0032886	regulation of microtubule-based process	47	8	8.19	2312	0.59001	0.14153
GO:0045664	regulation of neuron differentiation	133	22	23.19	2560	0.64349	0.1417
GO:0008360	regulation of cell shape	65	14	11.33	1319	0.23299	0.14205
GO:0006811	ion transport	411	94	71.65	131	0.00232	0.14208
GO:0007143	female meiotic nuclear division	63	11	10.98	2224	0.54997	0.1428
GO:0006886	intracellular protein transport	324	63	56.49	1114	0.18348	0.14321
GO:0060548	negative regulation of cell death	129	40	22.49	60	0.0001	0.14353
GO:0006119	oxidative phosphorylation	67	28	11.68	25	2.4e-06	0.14387
GO:0045184	establishment of protein localization	417	77	72.7	1570	0.30382	0.14669
GO:0008101	decapentaplegic signaling pathway	19	8	3.31	248	0.01029	0.14674
GO:0043467	regulation of generation of precursor metabolites and energy	14	6	2.44	369	0.02344	0.14702
GO:0006536	glutamate metabolic process	13	4	2.27	1083	0.17814	0.14747
GO:0006123	mitochondrial electron transport, cytochrome c to oxygen	8	3	1.39	994	0.14947	0.1475
GO:0009631	cold acclimation	8	3	1.39	995	0.14947	0.1475
GO:0016202	regulation of striated muscle tissue development	8	3	1.39	996	0.14947	0.1475
GO:0042135	neurotransmitter catabolic process	8	3	1.39	997	0.14947	0.1475
GO:0045035	sensory organ precursor cell division	8	3	1.39	998	0.14947	0.1475
GO:0048682	sprouting of injured axon	8	3	1.39	999	0.14947	0.1475
GO:0098659	inorganic cation import across plasma membrane	8	3	1.39	1000	0.14947	0.1475
GO:1904059	regulation of locomotor rhythm	8	3	1.39	1001	0.14947	0.1475
GO:2000253	positive regulation of feeding behavior	8	3	1.39	1002	0.14947	0.1475
GO:0045824	negative regulation of innate immune response	26	7	4.53	1013	0.15357	0.15017
GO:0008285	negative regulation of cell proliferation	85	20	14.82	746	0.0925	0.15717
GO:0007310	oocyte dorsal/ventral axis specification	38	10	6.62	856	0.11204	0.15735
GO:0007307	eggshell chorion gene amplification	17	5	2.96	1027	0.16071	0.15783
GO:0043524	negative regulation of neuron apoptotic process	17	5	2.96	1028	0.16071	0.15783
GO:0008150	biological_process	7937	1378	1383.73	3626	0.99995	0.15797
GO:0000281	mitotic cytokinesis	57	16	9.94	431	0.03087	0.1592
GO:0042391	regulation of membrane potential	86	18	14.99	1317	0.23233	0.16009
GO:0007165	signal transduction	1368	255	238.5	785	0.10559	0.1634
GO:0006032	chitin catabolic process	22	6	3.84	1058	0.17158	0.16821
GO:0007430	terminal branching, open tracheal system	22	6	3.84	1059	0.17158	0.16821
GO:0035277	spiracle morphogenesis, open tracheal system	22	6	3.84	1060	0.17158	0.16821
GO:0006163	purine nucleotide metabolic process	163	59	28.42	13	5.6e-09	0.16949
GO:0050793	regulation of developmental process	625	137	108.96	123	0.00158	0.16953
GO:0009144	purine nucleoside triphosphate metabolic process	119	51	20.75	2	6e-11	0.16956
GO:0030030	cell projection organization	574	120	100.07	284	0.01458	0.17067
GO:0060429	epithelium development	858	163	149.58	848	0.10997	0.17144
GO:0042773	ATP synthesis coupled electron transport	59	25	10.29	29	6.1e-06	0.17157
GO:0044265	cellular macromolecule catabolic process	358	76	62.41	441	0.03332	0.17161
GO:0048858	cell projection morphogenesis	416	84	72.53	658	0.07442	0.17186
GO:0009260	ribonucleotide biosynthetic process	85	25	14.82	167	0.00432	0.17213
GO:0003008	system process	519	99	90.48	1051	0.1684	0.17223
GO:0030641	regulation of cellular pH	33	15	5.75	70	0.00017	0.17227
GO:0002683	negative regulation of immune system process	57	19	9.94	142	0.00266	0.17228
GO:0006101	citrate metabolic process	33	14	5.75	100	0.00068	0.17239
GO:0015988	energy coupled proton transmembrane transport, against electrochemical gradient	24	12	4.18	76	0.00026	0.17245
GO:0008104	protein localization	608	111	106	1572	0.30562	0.17251
GO:0015698	inorganic anion transport	41	14	7.15	207	0.00735	0.17257
GO:0035316	non-sensory hair organization	44	14	7.67	281	0.01439	0.17263
GO:0051961	negative regulation of nervous system development	105	24	18.31	744	0.09229	0.1727
GO:0035112	genitalia morphogenesis	19	9	3.31	137	0.0025	0.17272
GO:0014706	striated muscle tissue development	26	10	4.53	219	0.00896	0.17274
GO:0048808	male genitalia morphogenesis	17	8	2.96	173	0.00459	0.1728
GO:0000819	sister chromatid segregation	110	24	19.18	946	0.13779	0.17281
GO:0031348	negative regulation of defense response	33	10	5.75	540	0.04928	0.1729
GO:0009101	glycoprotein biosynthetic process	104	22	18.13	1130	0.18853	0.17293
GO:0061097	regulation of protein tyrosine kinase activity	9	5	1.57	255	0.01084	0.173
GO:0072331	signal transduction by p53 class mediator	9	5	1.57	256	0.01084	0.173
GO:0010528	regulation of transposition	15	6	2.62	442	0.03343	0.17301
GO:0034285	response to disaccharide	15	6	2.62	443	0.03343	0.17301
GO:0022610	biological adhesion	183	35	31.9	1547	0.29924	0.17302
GO:0002224	toll-like receptor signaling pathway	10	5	1.74	318	0.0186	0.17303
GO:1902850	microtubule cytoskeleton organization involved in mitosis	86	18	14.99	1318	0.23233	0.17305
GO:0033206	meiotic cytokinesis	40	10	6.97	982	0.14591	0.17305
GO:0048139	female germ-line cyst encapsulation	12	5	2.09	512	0.04316	0.17307
GO:0034124	regulation of MyD88-dependent toll-like receptor signaling pathway	8	4	1.39	457	0.03562	0.17311
GO:0042177	negative regulation of protein catabolic process	8	4	1.39	458	0.03562	0.17311
GO:0044247	cellular polysaccharide catabolic process	14	5	2.44	699	0.08086	0.17311
GO:1903312	negative regulation of mRNA metabolic process	10	4	1.74	690	0.08001	0.17315
GO:0021954	central nervous system neuron development	6	3	1.05	636	0.06985	0.17319
GO:1903051	negative regulation of proteolysis involved in cellular protein catabolic process	6	3	1.05	637	0.06985	0.17319
GO:0032272	negative regulation of protein polymerization	12	4	2.09	963	0.1419	0.1732
GO:0051048	negative regulation of secretion	12	4	2.09	964	0.1419	0.1732
GO:0046463	acylglycerol biosynthetic process	13	4	2.27	1084	0.17814	0.17322
GO:0032239	regulation of nucleobase-containing compound transport	8	3	1.39	1003	0.14947	0.17323
GO:0043149	stress fiber assembly	8	3	1.39	1004	0.14947	0.17323
GO:0051984	positive regulation of chromosome segregation	8	3	1.39	1005	0.14947	0.17323
GO:0008272	sulfate transport	9	3	1.57	1148	0.19648	0.17326
GO:0055090	acylglycerol homeostasis	27	6	4.71	1604	0.32697	0.17327
GO:0043631	RNA polyadenylation	28	6	4.88	1750	0.36052	0.17329
GO:0007593	chitin-based cuticle sclerotization	34	7	5.93	1784	0.3803	0.1733
GO:0009648	photoperiodism	11	3	1.92	1514	0.29792	0.1733
GO:0006595	polyamine metabolic process	6	2	1.05	1429	0.28178	0.17332
GO:0009394	2'-deoxyribonucleotide metabolic process	6	2	1.05	1430	0.28178	0.17332
GO:0098927	vesicle-mediated transport between endosomal compartments	6	2	1.05	1431	0.28178	0.17332
GO:1900544	positive regulation of purine nucleotide metabolic process	6	2	1.05	1432	0.28178	0.17332
GO:0034440	lipid oxidation	35	7	6.1	1848	0.41119	0.17332
GO:0072091	regulation of stem cell proliferation	53	10	9.24	1946	0.44699	0.17334
GO:0006034	cuticle chitin metabolic process	7	2	1.22	1677	0.35179	0.17334
GO:0034724	DNA replication-independent nucleosome organization	7	2	1.22	1678	0.35179	0.17334
GO:0001742	oenocyte differentiation	8	2	1.39	1859	0.41923	0.17336
GO:0046500	S-adenosylmethionine metabolic process	8	2	1.39	1860	0.41923	0.17336
GO:0071025	RNA surveillance	14	3	2.44	1966	0.45175	0.17337
GO:0098534	centriole assembly	26	5	4.53	2063	0.48381	0.17338
GO:0002921	negative regulation of humoral immune response	10	2	1.74	2156	0.54199	0.1734
GO:1902275	regulation of chromatin organization	97	17	16.91	2151	0.5327	0.17341
GO:0034329	cell junction assembly	69	12	12.03	2246	0.55365	0.17343
GO:0090659	walking behavior	15	2	2.62	2987	0.76484	0.17351
GO:0120035	regulation of plasma membrane bounded cell projection organization	115	19	20.05	2554	0.64081	0.17356
GO:0051248	negative regulation of protein metabolic process	197	33	34.34	2521	0.63055	0.17359
GO:0050906	detection of stimulus involved in sensory perception	39	5	6.8	3229	0.83456	0.17366
GO:0031497	chromatin assembly	40	5	6.97	3263	0.85079	0.17368
GO:0006506	GPI anchor biosynthetic process	27	7	4.71	1072	0.178	0.17421
GO:0036335	intestinal stem cell homeostasis	27	7	4.71	1073	0.178	0.17421
GO:0090090	negative regulation of canonical Wnt signaling pathway	27	7	4.71	1074	0.178	0.17421
GO:0048489	synaptic vesicle transport	81	19	14.12	773	0.10161	0.17434
GO:0009047	dosage compensation by hyperactivation of X chromosome	13	4	2.27	1085	0.17814	0.17543
GO:0031935	regulation of chromatin silencing	40	8	6.97	1815	0.39641	0.17566
GO:0001933	negative regulation of protein phosphorylation	65	12	11.33	1999	0.464	0.17577
GO:0007367	segment polarity determination	32	8	5.58	1105	0.18171	0.17755
GO:0007015	actin filament organization	137	29	23.88	987	0.14752	0.17766
GO:0048190	wing disc dorsal/ventral pattern formation	47	11	8.19	1118	0.18426	0.17924
GO:0007224	smoothened signaling pathway	54	15	9.41	475	0.03916	0.18765
GO:0034599	cellular response to oxidative stress	36	9	6.28	1034	0.16256	0.18883
GO:0030968	endoplasmic reticulum unfolded protein response	18	5	3.14	1137	0.19248	0.18919
GO:0035099	hemocyte migration	18	5	3.14	1138	0.19248	0.18919
GO:0048137	spermatocyte division	18	5	3.14	1139	0.19248	0.18919
GO:0045924	regulation of female receptivity	18	7	3.14	390	0.02587	0.1933
GO:0001752	compound eye photoreceptor fate commitment	48	12	8.37	869	0.11845	0.19335
GO:0030239	myofibril assembly	46	11	8.02	1047	0.16562	0.19355
GO:0046578	regulation of Ras protein signal transduction	124	24	21.62	1595	0.31962	0.19371
GO:0043094	cellular metabolic compound salvage	20	5	3.49	1404	0.26151	0.19401
GO:0002052	positive regulation of neuroblast proliferation	9	3	1.57	1149	0.19648	0.19404
GO:0006855	drug transmembrane transport	9	3	1.57	1150	0.19648	0.19404
GO:0007064	mitotic sister chromatid cohesion	9	3	1.57	1151	0.19648	0.19404
GO:0007523	larval visceral muscle development	9	3	1.57	1152	0.19648	0.19404
GO:0008062	eclosion rhythm	9	3	1.57	1153	0.19648	0.19404
GO:0008608	attachment of spindle microtubules to kinetochore	9	3	1.57	1154	0.19648	0.19404
GO:0018279	protein N-linked glycosylation via asparagine	9	3	1.57	1155	0.19648	0.19404
GO:0035041	sperm chromatin decondensation	9	3	1.57	1156	0.19648	0.19404
GO:0048140	male germ-line cyst encapsulation	9	3	1.57	1157	0.19648	0.19404
GO:0050686	negative regulation of mRNA processing	9	3	1.57	1158	0.19648	0.19404
GO:0060571	morphogenesis of an epithelial fold	9	3	1.57	1159	0.19648	0.19404
GO:0035209	pupal development	15	4	2.62	1372	0.25795	0.19405
GO:0048565	digestive tract development	91	17	15.86	1855	0.41879	0.1941
GO:0034333	adherens junction assembly	19	4	3.31	1920	0.42876	0.19426
GO:0007614	short-term memory	23	6	4.01	1173	0.20006	0.1963
GO:0007409	axonogenesis	305	61	53.17	909	0.1305	0.19655
GO:0048813	dendrite morphogenesis	145	29	25.28	1323	0.23487	0.19864
GO:0008593	regulation of Notch signaling pathway	99	21	17.26	1134	0.19175	0.19888
GO:0030718	germ-line stem cell population maintenance	69	18	12.03	525	0.04568	0.19895
GO:0010501	RNA secondary structure unwinding	28	7	4.88	1186	0.20395	0.19977
GO:0045454	cell redox homeostasis	28	7	4.88	1187	0.20395	0.19977
GO:0046716	muscle cell cellular homeostasis	28	7	4.88	1188	0.20395	0.19977
GO:0048488	synaptic vesicle endocytosis	43	10	7.5	1193	0.20517	0.20003
GO:0016579	protein deubiquitination	41	10	7.15	1041	0.1646	0.20073
GO:0007155	cell adhesion	182	34	31.73	1745	0.35655	0.20097
GO:0032446	protein modification by small protein conjugation	179	44	31.21	220	0.00906	0.20619
GO:0009156	ribonucleoside monophosphate biosynthetic process	53	20	9.24	84	0.00034	0.20677
GO:0007167	enzyme linked receptor protein signaling pathway	235	51	40.97	543	0.05096	0.20685
GO:0007306	eggshell chorion assembly	67	20	11.68	215	0.00846	0.20737
GO:0042176	regulation of protein catabolic process	56	15	9.76	546	0.05249	0.20814
GO:0050777	negative regulation of immune response	40	11	6.97	666	0.07577	0.20844
GO:0042157	lipoprotein metabolic process	60	14	10.46	1012	0.1497	0.20855
GO:0072593	reactive oxygen species metabolic process	32	9	5.58	739	0.09126	0.20859
GO:0090097	regulation of decapentaplegic signaling pathway	11	5	1.92	422	0.02929	0.20868
GO:0045597	positive regulation of cell differentiation	92	19	16.04	1334	0.24326	0.20869
GO:0035051	cardiocyte differentiation	23	7	4.01	733	0.09087	0.2087
GO:0010001	glial cell differentiation	35	9	6.1	978	0.1427	0.20872
GO:0008156	negative regulation of DNA replication	12	5	2.09	513	0.04316	0.20873
GO:1904799	regulation of neuron remodeling	10	4	1.74	691	0.08001	0.20889
GO:0048863	stem cell differentiation	80	16	13.95	1588	0.31404	0.20892
GO:0007460	R8 cell fate commitment	10	3	1.74	1340	0.24639	0.20913
GO:0002011	morphogenesis of an epithelial sheet	5	2	0.87	1209	0.21114	0.20917
GO:0006501	C-terminal protein lipidation	5	2	0.87	1210	0.21114	0.20917
GO:0006734	NADH metabolic process	5	2	0.87	1211	0.21114	0.20917
GO:0007216	G-protein coupled glutamate receptor signaling pathway	5	2	0.87	1212	0.21114	0.20917
GO:0007521	muscle cell fate determination	5	2	0.87	1213	0.21114	0.20917
GO:0007604	phototransduction, UV	5	2	0.87	1214	0.21114	0.20917
GO:0009071	serine family amino acid catabolic process	5	2	0.87	1215	0.21114	0.20917
GO:0015740	C4-dicarboxylate transport	5	2	0.87	1216	0.21114	0.20917
GO:0021955	central nervous system neuron axonogenesis	5	2	0.87	1217	0.21114	0.20917
GO:0030423	targeting of mRNA for destruction involved in RNA interference	5	2	0.87	1218	0.21114	0.20917
GO:0032790	ribosome disassembly	5	2	0.87	1219	0.21114	0.20917
GO:0034312	diol biosynthetic process	5	2	0.87	1220	0.21114	0.20917
GO:0035310	notum cell fate specification	5	2	0.87	1221	0.21114	0.20917
GO:0043471	regulation of cellular carbohydrate catabolic process	5	2	0.87	1222	0.21114	0.20917
GO:0045317	equator specification	5	2	0.87	1223	0.21114	0.20917
GO:0045434	negative regulation of female receptivity, post-mating	5	2	0.87	1224	0.21114	0.20917
GO:0045745	positive regulation of G-protein coupled receptor protein signaling pathway	5	2	0.87	1225	0.21114	0.20917
GO:0048047	mating behavior, sex discrimination	5	2	0.87	1226	0.21114	0.20917
GO:0048060	negative gravitaxis	5	2	0.87	1227	0.21114	0.20917
GO:0048499	synaptic vesicle membrane organization	5	2	0.87	1228	0.21114	0.20917
GO:0051282	regulation of sequestering of calcium ion	5	2	0.87	1229	0.21114	0.20917
GO:0051496	positive regulation of stress fiber assembly	5	2	0.87	1230	0.21114	0.20917
GO:0051601	exocyst localization	5	2	0.87	1231	0.21114	0.20917
GO:0051780	behavioral response to nutrient	5	2	0.87	1232	0.21114	0.20917
GO:0051791	medium-chain fatty acid metabolic process	5	2	0.87	1233	0.21114	0.20917
GO:0051928	positive regulation of calcium ion transport	5	2	0.87	1234	0.21114	0.20917
GO:0060158	phospholipase C-activating dopamine receptor signaling pathway	5	2	0.87	1235	0.21114	0.20917
GO:0061060	negative regulation of peptidoglycan recognition protein signaling pathway	5	2	0.87	1236	0.21114	0.20917
GO:0061382	Malpighian tubule tip cell differentiation	5	2	0.87	1237	0.21114	0.20917
GO:0061864	basement membrane constituent secretion	5	2	0.87	1238	0.21114	0.20917
GO:0071168	protein localization to chromatin	5	2	0.87	1239	0.21114	0.20917
GO:0071712	ER-associated misfolded protein catabolic process	5	2	0.87	1240	0.21114	0.20917
GO:0071786	endoplasmic reticulum tubular network organization	5	2	0.87	1241	0.21114	0.20917
GO:0071907	determination of digestive tract left/right asymmetry	5	2	0.87	1242	0.21114	0.20917
GO:0090224	regulation of spindle organization	5	2	0.87	1243	0.21114	0.20917
GO:0097061	dendritic spine organization	5	2	0.87	1244	0.21114	0.20917
GO:1904801	positive regulation of neuron remodeling	5	2	0.87	1245	0.21114	0.20917
GO:2000059	negative regulation of ubiquitin-dependent protein catabolic process	5	2	0.87	1246	0.21114	0.20917
GO:2000677	regulation of transcription regulatory region DNA binding	5	2	0.87	1247	0.21114	0.20917
GO:0045910	negative regulation of DNA recombination	11	3	1.92	1515	0.29792	0.20918
GO:1903531	negative regulation of secretion by cell	11	3	1.92	1516	0.29792	0.20918
GO:0007093	mitotic cell cycle checkpoint	43	7	7.5	2556	0.64179	0.20956
GO:0048865	stem cell fate commitment	29	4	5.06	3017	0.77	0.2097
GO:0000070	mitotic sister chromatid segregation	98	21	17.09	1098	0.17874	0.21295
GO:0007094	mitotic spindle assembly checkpoint	14	4	2.44	1255	0.21705	0.21392
GO:0044331	cell-cell adhesion mediated by cadherin	14	4	2.44	1256	0.21705	0.21392
GO:0045880	positive regulation of smoothened signaling pathway	14	4	2.44	1257	0.21705	0.21392
GO:2000134	negative regulation of G1/S transition of mitotic cell cycle	14	4	2.44	1258	0.21705	0.21392
GO:0032509	endosome transport via multivesicular body sorting pathway	20	5	3.49	1405	0.26151	0.21393
GO:0050829	defense response to Gram-negative bacterium	88	18	15.34	1415	0.26487	0.21792
GO:0007422	peripheral nervous system development	78	17	13.6	1133	0.1898	0.22143
GO:0007280	pole cell migration	19	5	3.31	1281	0.22622	0.22253
GO:0035293	chitin-based larval cuticle pattern formation	19	5	3.31	1282	0.22622	0.22253
GO:0035206	regulation of hemocyte proliferation	35	11	6.1	432	0.03112	0.225
GO:0045214	sarcomere organization	34	8	5.93	1304	0.23067	0.22577
GO:0000045	autophagosome assembly	35	8	6.1	1369	0.25674	0.22593
GO:0001737	establishment of imaginal disc-derived wing hair orientation	24	6	4.18	1296	0.23013	0.22597
GO:0035096	larval midgut cell programmed cell death	24	6	4.18	1297	0.23013	0.22597
GO:0006839	mitochondrial transport	77	15	13.42	1756	0.36196	0.22607
GO:0006897	endocytosis	191	45	33.3	310	0.01787	0.23201
GO:0006821	chloride transport	34	11	5.93	384	0.02519	0.24213
GO:0072347	response to anesthetic	22	8	3.84	402	0.02679	0.24246
GO:0035222	wing disc pattern formation	69	16	12.03	936	0.13541	0.24251
GO:1900073	regulation of neuromuscular synaptic transmission	19	5	3.31	1283	0.22622	0.24336
GO:0032956	regulation of actin cytoskeleton organization	90	17	15.69	1820	0.39968	0.24346
GO:0006998	nuclear envelope organization	15	4	2.62	1373	0.25795	0.24347
GO:0000022	mitotic spindle elongation	10	3	1.74	1341	0.24639	0.24351
GO:0003384	apical constriction involved in gastrulation	10	3	1.74	1342	0.24639	0.24351
GO:0008343	adult feeding behavior	10	3	1.74	1343	0.24639	0.24351
GO:0015701	bicarbonate transport	10	3	1.74	1344	0.24639	0.24351
GO:0030381	chorion-containing eggshell pattern formation	10	3	1.74	1345	0.24639	0.24351
GO:0033617	mitochondrial respiratory chain complex IV assembly	10	3	1.74	1346	0.24639	0.24351
GO:0043488	regulation of mRNA stability	10	3	1.74	1347	0.24639	0.24351
GO:0070593	dendrite self-avoidance	10	3	1.74	1348	0.24639	0.24351
GO:2000737	negative regulation of stem cell differentiation	10	3	1.74	1349	0.24639	0.24351
GO:0051299	centrosome separation	22	4	3.84	2227	0.55031	0.2439
GO:0016331	morphogenesis of embryonic epithelium	115	20	20.05	2199	0.54377	0.24395
GO:0098609	cell-cell adhesion	104	17	18.13	2593	0.65584	0.24435
GO:0006812	cation transport	232	57	40.45	155	0.00332	0.24747
GO:0051603	proteolysis involved in cellular protein catabolic process	249	57	43.41	288	0.01529	0.24878
GO:0007163	establishment or maintenance of cell polarity	201	40	35.04	1172	0.19896	0.25272
GO:0006887	exocytosis	95	20	16.56	1203	0.209	0.25347
GO:2000736	regulation of stem cell differentiation	27	8	4.71	716	0.08376	0.25357
GO:0045187	regulation of circadian sleep/wake cycle, sleep	31	7	5.4	1495	0.28895	0.25432
GO:0035072	ecdysone-mediated induction of salivary gland cell autophagic cell death	15	4	2.62	1374	0.25795	0.25442
GO:0035006	melanization defense response	44	6	7.67	3122	0.80356	0.25576
GO:0033227	dsRNA transport	25	6	4.36	1399	0.26149	0.25697
GO:0035149	lumen formation, open tracheal system	25	6	4.36	1400	0.26149	0.25697
GO:0008039	synaptic target recognition	41	8	7.15	1912	0.42507	0.25741
GO:0035147	branch fusion, open tracheal system	20	5	3.49	1406	0.26151	0.25745
GO:0007427	epithelial cell migration, open tracheal system	36	7	6.28	1941	0.44198	0.25749
GO:0007520	myoblast fusion	49	14	8.54	464	0.0363	0.26967
GO:0006396	RNA processing	542	70	94.49	3616	0.99877	0.27137
GO:0010941	regulation of cell death	259	63	45.15	143	0.00269	0.27393
GO:0045475	locomotor rhythm	65	15	11.33	992	0.14934	0.27482
GO:0010604	positive regulation of macromolecule metabolic process	643	124	112.1	841	0.10913	0.27549
GO:0010927	cellular component assembly involved in morphogenesis	119	33	20.75	153	0.0033	0.2758
GO:0009060	aerobic respiration	46	18	8.02	91	0.0004	0.27656
GO:0006611	protein export from nucleus	58	17	10.11	309	0.01749	0.2775
GO:0006813	potassium ion transport	50	12	8.72	990	0.14913	0.27861
GO:0007603	phototransduction, visible light	28	8	4.88	767	0.10016	0.27867
GO:0007549	dosage compensation	19	6	3.31	758	0.09802	0.2788
GO:0006066	alcohol metabolic process	60	13	10.46	1324	0.23715	0.27883
GO:0060047	heart contraction	28	7	4.88	1189	0.20395	0.27898
GO:0006515	protein quality control for misfolded or incompletely synthesized proteins	11	4	1.92	837	0.10899	0.27899
GO:0050714	positive regulation of protein secretion	13	4	2.27	1086	0.17814	0.2791
GO:0046847	filopodium assembly	37	8	6.45	1579	0.31124	0.27915
GO:0032102	negative regulation of response to external stimulus	21	5	3.66	1538	0.29794	0.27922
GO:0001678	cellular glucose homeostasis	6	2	1.05	1433	0.28178	0.27934
GO:0001952	regulation of cell-matrix adhesion	6	2	1.05	1434	0.28178	0.27934
GO:0006264	mitochondrial DNA replication	6	2	1.05	1435	0.28178	0.27934
GO:0006273	lagging strand elongation	6	2	1.05	1436	0.28178	0.27934
GO:0006560	proline metabolic process	6	2	1.05	1437	0.28178	0.27934
GO:0006817	phosphate ion transport	6	2	1.05	1438	0.28178	0.27934
GO:0007348	regulation of syncytial blastoderm mitotic cell cycle	6	2	1.05	1439	0.28178	0.27934
GO:0007473	wing disc proximal/distal pattern formation	6	2	1.05	1440	0.28178	0.27934
GO:0007506	gonadal mesoderm development	6	2	1.05	1441	0.28178	0.27934
GO:0008203	cholesterol metabolic process	6	2	1.05	1442	0.28178	0.27934
GO:0009608	response to symbiont	6	2	1.05	1443	0.28178	0.27934
GO:0010496	intercellular transport	6	2	1.05	1444	0.28178	0.27934
GO:0010635	regulation of mitochondrial fusion	6	2	1.05	1445	0.28178	0.27934
GO:0010888	negative regulation of lipid storage	6	2	1.05	1446	0.28178	0.27934
GO:0010996	response to auditory stimulus	6	2	1.05	1447	0.28178	0.27934
GO:0015014	heparan sulfate proteoglycan biosynthetic process, polysaccharide chain biosynthetic process	6	2	1.05	1448	0.28178	0.27934
GO:0018027	peptidyl-lysine dimethylation	6	2	1.05	1449	0.28178	0.27934
GO:0018200	peptidyl-glutamic acid modification	6	2	1.05	1450	0.28178	0.27934
GO:0030728	ovulation	6	2	1.05	1451	0.28178	0.27934
GO:0031623	receptor internalization	6	2	1.05	1452	0.28178	0.27934
GO:0031990	mRNA export from nucleus in response to heat stress	6	2	1.05	1453	0.28178	0.27934
GO:0032922	circadian regulation of gene expression	6	2	1.05	1454	0.28178	0.27934
GO:0032924	activin receptor signaling pathway	6	2	1.05	1455	0.28178	0.27934
GO:0032933	SREBP signaling pathway	6	2	1.05	1456	0.28178	0.27934
GO:0032958	inositol phosphate biosynthetic process	6	2	1.05	1457	0.28178	0.27934
GO:0036090	cleavage furrow ingression	6	2	1.05	1458	0.28178	0.27934
GO:0042694	muscle cell fate specification	6	2	1.05	1459	0.28178	0.27934
GO:0042770	signal transduction in response to DNA damage	6	2	1.05	1460	0.28178	0.27934
GO:0042908	xenobiotic transport	6	2	1.05	1461	0.28178	0.27934
GO:0046692	sperm competition	6	2	1.05	1462	0.28178	0.27934
GO:0048172	regulation of short-term neuronal synaptic plasticity	6	2	1.05	1463	0.28178	0.27934
GO:0048562	embryonic organ morphogenesis	6	2	1.05	1464	0.28178	0.27934
GO:0050884	neuromuscular process controlling posture	6	2	1.05	1465	0.28178	0.27934
GO:0050994	regulation of lipid catabolic process	6	2	1.05	1466	0.28178	0.27934
GO:0051255	spindle midzone assembly	6	2	1.05	1467	0.28178	0.27934
GO:0055093	response to hyperoxia	6	2	1.05	1468	0.28178	0.27934
GO:0090251	protein localization involved in establishment of planar polarity	6	2	1.05	1469	0.28178	0.27934
GO:0097320	plasma membrane tubulation	6	2	1.05	1470	0.28178	0.27934
GO:1900087	positive regulation of G1/S transition of mitotic cell cycle	6	2	1.05	1471	0.28178	0.27934
GO:1903078	positive regulation of protein localization to plasma membrane	6	2	1.05	1472	0.28178	0.27934
GO:1903146	regulation of autophagy of mitochondrion	6	2	1.05	1473	0.28178	0.27934
GO:2000300	regulation of synaptic vesicle exocytosis	6	2	1.05	1474	0.28178	0.27934
GO:0008592	regulation of Toll signaling pathway	23	4	4.01	2290	0.58772	0.27963
GO:0007188	adenylate cyclase-modulating G-protein coupled receptor signaling pathway	38	6	6.62	2623	0.67156	0.27981
GO:0000086	G2/M transition of mitotic cell cycle	34	5	5.93	2856	0.731	0.27991
GO:0006401	RNA catabolic process	86	14	14.99	2592	0.65579	0.27991
GO:0051294	establishment of spindle orientation	23	3	4.01	3097	0.7913	0.27993
GO:0032869	cellular response to insulin stimulus	47	7	8.19	2860	0.73498	0.27999
GO:0009451	RNA modification	93	14	16.21	3016	0.76815	0.28029
GO:0032456	endocytic recycling	31	7	5.4	1496	0.28895	0.28371
GO:0030036	actin cytoskeleton organization	259	54	45.15	720	0.08445	0.28428
GO:0042048	olfactory behavior	68	20	11.86	233	0.01008	0.28494
GO:0006281	DNA repair	159	25	27.72	2966	0.74787	0.28691
GO:0007602	phototransduction	56	14	9.76	753	0.09691	0.28732
GO:0034605	cellular response to heat	32	8	5.58	1106	0.18171	0.28843
GO:0007304	chorion-containing eggshell formation	83	25	14.47	148	0.00305	0.29073
GO:0009880	embryonic pattern specification	199	43	34.69	654	0.07255	0.29155
GO:0051094	positive regulation of developmental process	183	38	31.9	941	0.13574	0.29248
GO:0033674	positive regulation of kinase activity	77	16	13.42	1392	0.25916	0.29282
GO:0045931	positive regulation of mitotic cell cycle	33	11	5.75	339	0.02012	0.29293
GO:0030031	cell projection assembly	122	26	21.27	1017	0.15445	0.29309
GO:0040014	regulation of multicellular organism growth	45	12	7.85	687	0.0799	0.29337
GO:0007626	locomotory behavior	167	33	29.11	1326	0.23923	0.29341
GO:0048085	adult chitin-containing cuticle pigmentation	32	6	5.58	2084	0.49409	0.29403
GO:0007034	vacuolar transport	45	10	7.85	1360	0.24944	0.29419
GO:0006904	vesicle docking involved in exocytosis	33	7	5.75	1645	0.34949	0.29457
GO:0006072	glycerol-3-phosphate metabolic process	11	3	1.92	1517	0.29792	0.29465
GO:0006171	cAMP biosynthetic process	11	3	1.92	1518	0.29792	0.29465
GO:0007318	pole plasm protein localization	11	3	1.92	1519	0.29792	0.29465
GO:0007519	skeletal muscle tissue development	11	3	1.92	1520	0.29792	0.29465
GO:0008366	axon ensheathment	11	3	1.92	1521	0.29792	0.29465
GO:0030837	negative regulation of actin filament polymerization	11	3	1.92	1522	0.29792	0.29465
GO:0045742	positive regulation of epidermal growth factor receptor signaling pathway	11	3	1.92	1523	0.29792	0.29465
GO:0085029	extracellular matrix assembly	11	3	1.92	1524	0.29792	0.29465
GO:0090254	cell elongation involved in imaginal disc-derived wing morphogenesis	11	3	1.92	1525	0.29792	0.29465
GO:2000765	regulation of cytoplasmic translation	11	3	1.92	1526	0.29792	0.29465
GO:0019731	antibacterial humoral response	29	5	5.06	2282	0.58729	0.29511
GO:0006487	protein N-linked glycosylation	33	9	5.75	819	0.107	0.29528
GO:0003341	cilium movement	16	4	2.79	1549	0.30017	0.29628
GO:0016360	sensory organ precursor cell fate determination	16	4	2.79	1550	0.30017	0.29628
GO:0018990	ecdysis, chitin-based cuticle	16	4	2.79	1551	0.30017	0.29628
GO:0035212	cell competition in a multicellular organism	16	4	2.79	1552	0.30017	0.29628
GO:0048132	female germ-line stem cell asymmetric division	16	4	2.79	1553	0.30017	0.29628
GO:0000212	meiotic spindle organization	35	7	6.1	1849	0.41119	0.29642
GO:0006520	cellular amino acid metabolic process	153	22	26.67	3313	0.86865	0.29698
GO:0031146	SCF-dependent proteasomal ubiquitin-dependent protein catabolic process	42	9	7.32	1565	0.30379	0.2976
GO:0045944	positive regulation of transcription by RNA polymerase II	254	50	44.28	1131	0.18911	0.30144
GO:0006470	protein dephosphorylation	89	18	15.52	1428	0.28174	0.30188
GO:0007411	axon guidance	241	43	42.02	1989	0.4598	0.30303
GO:0048869	cellular developmental process	1514	314	263.95	62	0.00012	0.3035
GO:0006457	protein folding	116	20	20.22	2263	0.5607	0.30454
GO:0016043	cellular component organization	2387	451	416.15	279	0.01373	0.30573
GO:0022412	cellular process involved in reproduction in multicellular organism	744	167	129.71	64	0.00014	0.30804
GO:0051124	synaptic growth at neuromuscular junction	130	30	22.66	576	0.05921	0.30924
GO:0007292	female gamete generation	612	136	106.7	115	0.00093	0.31003
GO:0050801	ion homeostasis	140	44	24.41	42	3.3e-05	0.3126
GO:0043547	positive regulation of GTPase activity	58	12	10.11	1571	0.30489	0.3131
GO:0021700	developmental maturation	216	54	37.66	146	0.00283	0.31324
GO:0002682	regulation of immune system process	198	49	34.52	181	0.00533	0.31365
GO:0048592	eye morphogenesis	284	61	49.51	505	0.04266	0.31424
GO:0000904	cell morphogenesis involved in differentiation	439	87	76.54	765	0.0999	0.31438
GO:0030703	eggshell formation	85	26	14.82	127	0.002	0.31441
GO:0031503	protein-containing complex localization	77	22	13.42	251	0.0103	0.31496
GO:0010498	proteasomal protein catabolic process	182	38	31.73	900	0.12809	0.31541
GO:0046666	retinal cell programmed cell death	29	11	5.06	202	0.00702	0.31553
GO:0009895	negative regulation of catabolic process	35	11	6.1	433	0.03112	0.31575
GO:0007622	rhythmic behavior	100	22	17.43	953	0.14105	0.3158
GO:0031668	cellular response to extracellular stimulus	67	16	11.68	852	0.11099	0.31586
GO:1901989	positive regulation of cell cycle phase transition	21	8	3.66	334	0.02003	0.31587
GO:0046434	organophosphate catabolic process	51	13	8.89	750	0.09466	0.31591
GO:0008358	maternal determination of anterior/posterior axis, embryo	86	19	14.99	1021	0.15784	0.31592
GO:0048512	circadian behavior	98	21	17.09	1099	0.17874	0.31593
GO:1901654	response to ketone	46	12	8.02	742	0.09174	0.31593
GO:0048580	regulation of post-embryonic development	18	7	3.14	391	0.02587	0.31597
GO:1903706	regulation of hemopoiesis	13	6	2.27	294	0.01566	0.316
GO:2000369	regulation of clathrin-dependent endocytosis	8	5	1.39	188	0.00562	0.31602
GO:0051338	regulation of transferase activity	127	25	22.14	1488	0.28329	0.31615
GO:0033047	regulation of mitotic sister chromatid segregation	31	8	5.4	1024	0.15909	0.31623
GO:0040013	negative regulation of locomotion	8	4	1.39	459	0.03562	0.31623
GO:0060811	intracellular mRNA localization involved in anterior/posterior axis specification	60	13	10.46	1325	0.23715	0.31623
GO:0051101	regulation of DNA binding	15	5	2.62	780	0.10458	0.31628
GO:0007621	negative regulation of female receptivity	7	3	1.22	802	0.10677	0.3164
GO:0032233	positive regulation of actin filament bundle assembly	7	3	1.22	803	0.10677	0.3164
GO:0043470	regulation of carbohydrate catabolic process	7	3	1.22	804	0.10677	0.3164
GO:0046008	regulation of female receptivity, post-mating	7	3	1.22	805	0.10677	0.3164
GO:0051208	sequestering of calcium ion	7	3	1.22	806	0.10677	0.3164
GO:0042745	circadian sleep/wake cycle	42	9	7.32	1566	0.30379	0.31642
GO:0006984	ER-nucleus signaling pathway	8	3	1.39	1006	0.14947	0.31644
GO:0070252	actin-mediated cell contraction	20	5	3.49	1407	0.26151	0.31646
GO:0050778	positive regulation of immune response	72	14	12.55	1769	0.37229	0.31646
GO:0048679	regulation of axon regeneration	9	3	1.57	1160	0.19648	0.31648
GO:0008643	carbohydrate transport	21	5	3.66	1539	0.29794	0.31649
GO:0032940	secretion by cell	200	36	34.87	1944	0.44493	0.3165
GO:0050673	epithelial cell proliferation	10	3	1.74	1350	0.24639	0.31651
GO:0009063	cellular amino acid catabolic process	39	8	6.8	1758	0.36778	0.31652
GO:0035082	axoneme assembly	22	5	3.84	1618	0.33511	0.31653
GO:0016125	sterol metabolic process	23	5	4.01	1772	0.37262	0.31657
GO:0014074	response to purine-containing compound	12	3	2.09	1654	0.34992	0.31658
GO:0035089	establishment of apical/basal cell polarity	12	3	2.09	1655	0.34992	0.31658
GO:0010675	regulation of cellular carbohydrate metabolic process	18	4	3.14	1791	0.38612	0.31659
GO:0051646	mitochondrion localization	24	5	4.18	1842	0.41012	0.3166
GO:0046132	pyrimidine ribonucleoside biosynthetic process	7	2	1.22	1679	0.35179	0.31661
GO:0046831	regulation of RNA export from nucleus	7	2	1.22	1680	0.35179	0.31661
GO:0071241	cellular response to inorganic substance	7	2	1.22	1681	0.35179	0.31661
GO:1904747	positive regulation of apoptotic process involved in development	7	2	1.22	1682	0.35179	0.31661
GO:0071229	cellular response to acid chemical	13	3	2.27	1821	0.40146	0.31662
GO:0002792	negative regulation of peptide secretion	8	2	1.39	1861	0.41923	0.31665
GO:0046464	acylglycerol catabolic process	8	2	1.39	1862	0.41923	0.31665
GO:0070071	proton-transporting two-sector ATPase complex assembly	10	2	1.74	2157	0.54199	0.31672
GO:0090257	regulation of muscle system process	11	2	1.92	2321	0.59623	0.31676
GO:0097501	stress response to metal ion	11	2	1.92	2322	0.59623	0.31676
GO:0022408	negative regulation of cell-cell adhesion	12	2	2.09	2562	0.6455	0.31679
GO:0032392	DNA geometric change	12	2	2.09	2563	0.6455	0.31679
GO:0046364	monosaccharide biosynthetic process	12	2	2.09	2564	0.6455	0.31679
GO:0040017	positive regulation of locomotion	18	3	3.14	2522	0.63067	0.3168
GO:0048864	stem cell development	18	3	3.14	2523	0.63067	0.3168
GO:0006720	isoprenoid metabolic process	24	4	4.18	2508	0.62324	0.31681
GO:0002813	regulation of biosynthetic process of antibacterial peptides active against Gram-negative bacteria	13	2	2.27	2749	0.68987	0.31683
GO:0045665	negative regulation of neuron differentiation	20	3	3.49	2790	0.70346	0.31687
GO:0032868	response to insulin	49	8	8.54	2546	0.63976	0.31688
GO:0071375	cellular response to peptide hormone stimulus	49	8	8.54	2547	0.63976	0.31688
GO:2001252	positive regulation of chromosome organization	50	8	8.72	2606	0.66331	0.31692
GO:0035337	fatty-acyl-CoA metabolic process	16	2	2.79	3105	0.79605	0.31694
GO:0006672	ceramide metabolic process	22	3	3.84	2979	0.76475	0.31695
GO:0071560	cellular response to transforming growth factor beta stimulus	22	3	3.84	2980	0.76475	0.31695
GO:0071479	cellular response to ionizing radiation	18	2	3.14	3243	0.84764	0.31701
GO:1902749	regulation of cell cycle G2/M phase transition	30	4	5.23	3100	0.7932	0.31703
GO:0040029	regulation of gene expression, epigenetic	165	27	28.77	2631	0.6746	0.31712
GO:0051258	protein polymerization	80	12	13.95	2978	0.76094	0.31717
GO:2000113	negative regulation of cellular macromolecule biosynthetic process	383	63	66.77	2821	0.7193	0.31752
GO:0016441	posttranscriptional gene silencing	56	6	9.76	3483	0.94197	0.31755
GO:0006352	DNA-templated transcription, initiation	90	11	15.69	3474	0.93206	0.31774
GO:0065003	protein-containing complex assembly	457	72	79.67	3262	0.85065	0.31838
GO:1901360	organic cyclic compound metabolic process	2239	376	390.35	3232	0.83536	0.32033
GO:0045887	positive regulation of synaptic growth at neuromuscular junction	27	6	4.71	1605	0.32697	0.32182
GO:0003333	amino acid transmembrane transport	33	7	5.75	1646	0.34949	0.32184
GO:0030261	chromosome condensation	52	9	9.07	2271	0.56693	0.32268
GO:0048812	neuron projection morphogenesis	414	83	72.18	724	0.08643	0.32418
GO:0019538	protein metabolic process	1989	317	346.76	3564	0.98115	0.3245
GO:0035220	wing disc development	341	76	59.45	262	0.01117	0.32498
GO:0007426	tracheal outgrowth, open tracheal system	22	5	3.84	1619	0.33511	0.3304
GO:1990542	mitochondrial transmembrane transport	35	7	6.1	1850	0.41119	0.33055
GO:0001666	response to hypoxia	49	8	8.54	2548	0.63976	0.33139
GO:0001700	embryonic development via the syncytial blastoderm	166	30	28.94	1945	0.44555	0.33333
GO:0007173	epidermal growth factor receptor signaling pathway	65	13	11.33	1628	0.33982	0.33852
GO:0046323	glucose import	17	4	2.96	1633	0.34309	0.33888
GO:0090175	regulation of establishment of planar polarity	17	4	2.96	1634	0.34309	0.33888
GO:0043161	proteasome-mediated ubiquitin-dependent protein catabolic process	171	35	29.81	1053	0.16913	0.33904
GO:0046034	ATP metabolic process	111	47	19.35	6	5.6e-10	0.33929
GO:0007297	ovarian follicle cell migration	128	28	22.32	861	0.11353	0.34409
GO:0031175	neuron projection development	442	90	77.06	568	0.05624	0.34424
GO:0016055	Wnt signaling pathway	104	23	18.13	904	0.12912	0.34448
GO:0038202	TORC1 signaling	38	11	6.62	555	0.05472	0.34474
GO:0051301	cell division	241	54	42.02	399	0.02648	0.34479
GO:0016079	synaptic vesicle exocytosis	63	14	10.98	1165	0.19759	0.34534
GO:0001578	microtubule bundle formation	34	8	5.93	1305	0.23067	0.34578
GO:0035282	segmentation	220	47	38.35	657	0.07365	0.34602
GO:0009062	fatty acid catabolic process	43	9	7.5	1610	0.3299	0.34604
GO:0030510	regulation of BMP signaling pathway	32	7	5.58	1593	0.31897	0.34608
GO:0007111	meiosis II cytokinesis	12	3	2.09	1656	0.34992	0.34632
GO:0009065	glutamine family amino acid catabolic process	12	3	2.09	1657	0.34992	0.34632
GO:0018107	peptidyl-threonine phosphorylation	12	3	2.09	1658	0.34992	0.34632
GO:0019432	triglyceride biosynthetic process	12	3	2.09	1659	0.34992	0.34632
GO:0032981	mitochondrial respiratory chain complex I assembly	12	3	2.09	1660	0.34992	0.34632
GO:0035234	ectopic germ cell programmed cell death	12	3	2.09	1661	0.34992	0.34632
GO:0046662	regulation of oviposition	12	3	2.09	1662	0.34992	0.34632
GO:0006383	transcription by RNA polymerase III	18	4	3.14	1792	0.38612	0.34634
GO:0009996	negative regulation of cell fate specification	18	4	3.14	1793	0.38612	0.34634
GO:0007031	peroxisome organization	19	4	3.31	1921	0.42876	0.34642
GO:0050807	regulation of synapse organization	135	31	23.54	575	0.05914	0.34651
GO:0007051	spindle organization	113	27	19.7	538	0.04879	0.34658
GO:0031401	positive regulation of protein modification process	178	38	31.03	768	0.10021	0.34666
GO:0007560	imaginal disc morphogenesis	354	68	61.72	1182	0.20231	0.3468
GO:0034637	cellular carbohydrate biosynthetic process	25	9	4.36	348	0.0206	0.34758
GO:0030177	positive regulation of Wnt signaling pathway	35	10	6.1	646	0.0706	0.34784
GO:0045927	positive regulation of growth	100	21	17.43	1195	0.20523	0.34793
GO:0050769	positive regulation of neurogenesis	66	14	11.51	1361	0.25159	0.34833
GO:0080135	regulation of cellular response to stress	101	20	17.61	1564	0.30153	0.34835
GO:0046700	heterocycle catabolic process	165	31	28.77	1742	0.35266	0.34838
GO:0048134	germ-line cyst formation	28	7	4.88	1190	0.20395	0.34848
GO:0006835	dicarboxylic acid transport	12	4	2.09	965	0.1419	0.34856
GO:0097237	cellular response to toxic substance	12	3	2.09	1663	0.34992	0.34891
GO:0019933	cAMP-mediated signaling	30	6	5.23	1916	0.42791	0.34895
GO:0000055	ribosomal large subunit export from nucleus	7	2	1.22	1683	0.35179	0.34896
GO:0006513	protein monoubiquitination	7	2	1.22	1684	0.35179	0.34896
GO:0007053	spindle assembly involved in male meiosis	7	2	1.22	1685	0.35179	0.34896
GO:0007191	adenylate cyclase-activating dopamine receptor signaling pathway	7	2	1.22	1686	0.35179	0.34896
GO:0007415	defasciculation of motor neuron axon	7	2	1.22	1687	0.35179	0.34896
GO:0009130	pyrimidine nucleoside monophosphate biosynthetic process	7	2	1.22	1688	0.35179	0.34896
GO:0010884	positive regulation of lipid storage	7	2	1.22	1689	0.35179	0.34896
GO:0014866	skeletal myofibril assembly	7	2	1.22	1690	0.35179	0.34896
GO:0015800	acidic amino acid transport	7	2	1.22	1691	0.35179	0.34896
GO:0016925	protein sumoylation	7	2	1.22	1692	0.35179	0.34896
GO:0019985	translesion synthesis	7	2	1.22	1693	0.35179	0.34896
GO:0021556	central nervous system formation	7	2	1.22	1694	0.35179	0.34896
GO:0021675	nerve development	7	2	1.22	1695	0.35179	0.34896
GO:0030512	negative regulation of transforming growth factor beta receptor signaling pathway	7	2	1.22	1696	0.35179	0.34896
GO:0030856	regulation of epithelial cell differentiation	7	2	1.22	1697	0.35179	0.34896
GO:0031034	myosin filament assembly	7	2	1.22	1698	0.35179	0.34896
GO:0035262	gonad morphogenesis	7	2	1.22	1699	0.35179	0.34896
GO:0036065	fucosylation	7	2	1.22	1700	0.35179	0.34896
GO:0042542	response to hydrogen peroxide	7	2	1.22	1701	0.35179	0.34896
GO:0043666	regulation of phosphoprotein phosphatase activity	7	2	1.22	1702	0.35179	0.34896
GO:0043984	histone H4-K16 acetylation	7	2	1.22	1703	0.35179	0.34896
GO:0044036	cell wall macromolecule metabolic process	7	2	1.22	1704	0.35179	0.34896
GO:0044728	DNA methylation or demethylation	7	2	1.22	1705	0.35179	0.34896
GO:0045842	positive regulation of mitotic metaphase/anaphase transition	7	2	1.22	1706	0.35179	0.34896
GO:0046825	regulation of protein export from nucleus	7	2	1.22	1707	0.35179	0.34896
GO:0048076	regulation of compound eye pigmentation	7	2	1.22	1708	0.35179	0.34896
GO:0048133	male germ-line stem cell asymmetric division	7	2	1.22	1709	0.35179	0.34896
GO:0048680	positive regulation of axon regeneration	7	2	1.22	1710	0.35179	0.34896
GO:0051224	negative regulation of protein transport	7	2	1.22	1711	0.35179	0.34896
GO:0051966	regulation of synaptic transmission, glutamatergic	7	2	1.22	1712	0.35179	0.34896
GO:0055083	monovalent inorganic anion homeostasis	7	2	1.22	1713	0.35179	0.34896
GO:0061357	positive regulation of Wnt protein secretion	7	2	1.22	1714	0.35179	0.34896
GO:0061462	protein localization to lysosome	7	2	1.22	1715	0.35179	0.34896
GO:0080009	mRNA methylation	7	2	1.22	1716	0.35179	0.34896
GO:0090527	actin filament reorganization	7	2	1.22	1717	0.35179	0.34896
GO:1901019	regulation of calcium ion transmembrane transporter activity	7	2	1.22	1718	0.35179	0.34896
GO:1903035	negative regulation of response to wounding	7	2	1.22	1719	0.35179	0.34896
GO:1903828	negative regulation of cellular protein localization	7	2	1.22	1720	0.35179	0.34896
GO:0046622	positive regulation of organ growth	18	3	3.14	2524	0.63067	0.34928
GO:0007169	transmembrane receptor protein tyrosine kinase signaling pathway	166	35	28.94	899	0.12635	0.35161
GO:0001709	cell fate determination	126	18	21.97	3297	0.85576	0.35852
GO:0030707	ovarian follicle cell development	273	61	47.59	340	0.02037	0.3638
GO:0006338	chromatin remodeling	104	16	18.13	2967	0.74841	0.36402
GO:0006417	regulation of translation	149	23	25.98	3023	0.77277	0.37007
GO:0034976	response to endoplasmic reticulum stress	77	19	13.42	604	0.06718	0.37081
GO:0008045	motor neuron axon guidance	67	13	11.68	1788	0.3833	0.37487
GO:0051017	actin filament bundle assembly	30	8	5.23	949	0.1379	0.38057
GO:0007475	apposition of dorsal and ventral imaginal disc-derived wing surfaces	18	4	3.14	1794	0.38612	0.38165
GO:0016339	calcium-dependent cell-cell adhesion via plasma membrane cell adhesion molecules	18	4	3.14	1795	0.38612	0.38165
GO:0035019	somatic stem cell population maintenance	18	4	3.14	1796	0.38612	0.38165
GO:0043248	proteasome assembly	18	4	3.14	1797	0.38612	0.38165
GO:1904263	positive regulation of TORC1 signaling	18	4	3.14	1798	0.38612	0.38165
GO:0065008	regulation of biological quality	1127	262	196.48	16	4.6e-08	0.38596
GO:0031338	regulation of vesicle fusion	29	6	5.06	1810	0.39425	0.38861
GO:0006810	transport	1467	294	255.76	130	0.00225	0.39737
GO:0008585	female gonad development	13	3	2.27	1822	0.40146	0.39759
GO:0019367	fatty acid elongation, saturated fatty acid	13	3	2.27	1823	0.40146	0.39759
GO:0034614	cellular response to reactive oxygen species	13	3	2.27	1824	0.40146	0.39759
GO:0034625	fatty acid elongation, monounsaturated fatty acid	13	3	2.27	1825	0.40146	0.39759
GO:0034626	fatty acid elongation, polyunsaturated fatty acid	13	3	2.27	1826	0.40146	0.39759
GO:0046835	carbohydrate phosphorylation	13	3	2.27	1827	0.40146	0.39759
GO:0000245	spliceosomal complex assembly	22	4	3.84	2228	0.55031	0.39786
GO:0030838	positive regulation of actin filament polymerization	35	6	6.1	2302	0.58776	0.39798
GO:0000077	DNA damage checkpoint	34	5	5.93	2857	0.731	0.39838
GO:0040007	growth	413	97	72	110	0.0008	0.4059
GO:0055059	asymmetric neuroblast division	40	6	6.97	2825	0.72096	0.40608
GO:0090407	organophosphate biosynthetic process	191	55	33.3	48	5.9e-05	0.40761
GO:0045333	cellular respiration	100	38	17.43	20	7.3e-07	0.40819
GO:0007608	sensory perception of smell	52	10	9.07	1908	0.42166	0.41405
GO:0006661	phosphatidylinositol biosynthetic process	35	9	6.1	979	0.1427	0.41521
GO:0009744	response to sucrose	14	5	2.44	700	0.08086	0.41535
GO:0000302	response to reactive oxygen species	24	6	4.18	1298	0.23013	0.41563
GO:0007584	response to nutrient	13	4	2.27	1087	0.17814	0.41567
GO:0035309	wing and notum subfield formation	13	4	2.27	1088	0.17814	0.41567
GO:0009794	regulation of mitotic cell cycle, embryonic	14	4	2.44	1259	0.21705	0.41574
GO:0015012	heparan sulfate proteoglycan biosynthetic process	14	4	2.44	1260	0.21705	0.41574
GO:0062013	positive regulation of small molecule metabolic process	14	4	2.44	1261	0.21705	0.41574
GO:0048067	cuticle pigmentation	43	9	7.5	1611	0.3299	0.41575
GO:0000289	nuclear-transcribed mRNA poly(A) tail shortening	13	3	2.27	1828	0.40146	0.41606
GO:0001178	regulation of transcriptional start site selection at RNA polymerase II promoter	8	2	1.39	1863	0.41923	0.41611
GO:0001676	long-chain fatty acid metabolic process	8	2	1.39	1864	0.41923	0.41611
GO:0001731	formation of translation preinitiation complex	8	2	1.39	1865	0.41923	0.41611
GO:0003401	axis elongation	8	2	1.39	1866	0.41923	0.41611
GO:0006474	N-terminal protein amino acid acetylation	8	2	1.39	1867	0.41923	0.41611
GO:0006488	dolichol-linked oligosaccharide biosynthetic process	8	2	1.39	1868	0.41923	0.41611
GO:0006509	membrane protein ectodomain proteolysis	8	2	1.39	1869	0.41923	0.41611
GO:0006544	glycine metabolic process	8	2	1.39	1870	0.41923	0.41611
GO:0006941	striated muscle contraction	8	2	1.39	1871	0.41923	0.41611
GO:0007301	female germline ring canal formation	8	2	1.39	1872	0.41923	0.41611
GO:0008584	male gonad development	8	2	1.39	1873	0.41923	0.41611
GO:0016330	second mitotic wave involved in compound eye morphogenesis	8	2	1.39	1874	0.41923	0.41611
GO:0016578	histone deubiquitination	8	2	1.39	1875	0.41923	0.41611
GO:0031453	positive regulation of heterochromatin assembly	8	2	1.39	1876	0.41923	0.41611
GO:0034446	substrate adhesion-dependent cell spreading	8	2	1.39	1877	0.41923	0.41611
GO:0035224	genital disc anterior/posterior pattern formation	8	2	1.39	1878	0.41923	0.41611
GO:0035269	protein O-linked mannosylation	8	2	1.39	1879	0.41923	0.41611
GO:0035335	peptidyl-tyrosine dephosphorylation	8	2	1.39	1880	0.41923	0.41611
GO:0046855	inositol phosphate dephosphorylation	8	2	1.39	1881	0.41923	0.41611
GO:0048935	peripheral nervous system neuron development	8	2	1.39	1882	0.41923	0.41611
GO:0061320	pericardial nephrocyte differentiation	8	2	1.39	1883	0.41923	0.41611
GO:0061331	epithelial cell proliferation involved in Malpighian tubule morphogenesis	8	2	1.39	1884	0.41923	0.41611
GO:0071236	cellular response to antibiotic	8	2	1.39	1885	0.41923	0.41611
GO:0097254	renal tubular secretion	8	2	1.39	1886	0.41923	0.41611
GO:1900407	regulation of cellular response to oxidative stress	8	2	1.39	1887	0.41923	0.41611
GO:1902358	sulfate transmembrane transport	8	2	1.39	1888	0.41923	0.41611
GO:1903053	regulation of extracellular matrix organization	8	2	1.39	1889	0.41923	0.41611
GO:0007277	pole cell development	26	5	4.53	2064	0.48381	0.41616
GO:0016126	sterol biosynthetic process	16	3	2.79	2200	0.54635	0.41626
GO:0051445	regulation of meiotic cell cycle	17	3	2.96	2305	0.58991	0.41633
GO:0051480	regulation of cytosolic calcium ion concentration	23	4	4.01	2291	0.58772	0.41635
GO:0045466	R7 cell differentiation	52	9	9.07	2272	0.56693	0.41636
GO:0016322	neuron remodeling	51	12	8.89	1050	0.16589	0.41637
GO:0035329	hippo signaling	35	6	6.1	2303	0.58776	0.41638
GO:0045570	regulation of imaginal disc growth	28	4	4.88	2956	0.7448	0.41669
GO:0016203	muscle attachment	39	8	6.8	1759	0.36778	0.42176
GO:0006413	translational initiation	57	11	9.94	1841	0.40783	0.42184
GO:0000122	negative regulation of transcription by RNA polymerase II	154	28	26.85	1940	0.43577	0.42263
GO:0006308	DNA catabolic process	19	4	3.31	1922	0.42876	0.42408
GO:0009312	oligosaccharide biosynthetic process	19	4	3.31	1923	0.42876	0.42408
GO:0048814	regulation of dendrite morphogenesis	29	5	5.06	2283	0.58729	0.42451
GO:0048513	animal organ development	1084	202	188.98	952	0.14071	0.43105
GO:0043067	regulation of programmed cell death	229	55	39.92	197	0.00639	0.43118
GO:0048469	cell maturation	173	43	30.16	212	0.00802	0.43181
GO:0010259	multicellular organism aging	142	37	24.76	195	0.00604	0.43199
GO:0031329	regulation of cellular catabolic process	156	39	27.2	236	0.01016	0.4321
GO:0019941	modification-dependent protein catabolic process	223	49	38.88	524	0.04542	0.4325
GO:0006754	ATP biosynthetic process	40	17	6.97	73	0.00018	0.43263
GO:0051640	organelle localization	230	47	40.1	908	0.1303	0.43335
GO:0045893	positive regulation of transcription, DNA-templated	341	66	59.45	1127	0.1878	0.4335
GO:0071426	ribonucleoprotein complex export from nucleus	49	15	8.54	306	0.01665	0.43355
GO:0014902	myotube differentiation	52	15	9.07	415	0.02844	0.43369
GO:0016051	carbohydrate biosynthetic process	52	15	9.07	416	0.02844	0.43369
GO:0098542	defense response to other organism	220	44	38.35	1068	0.17614	0.43369
GO:0046661	male sex differentiation	29	11	5.06	203	0.00702	0.4337
GO:0072525	pyridine-containing compound biosynthetic process	28	10	4.88	297	0.01589	0.43391
GO:0008037	cell recognition	98	22	17.09	875	0.12021	0.43394
GO:0015833	peptide transport	411	76	71.65	1563	0.30048	0.43396
GO:0002758	innate immune response-activating signal transduction	14	6	2.44	370	0.02344	0.43432
GO:0048568	embryonic organ development	49	12	8.54	925	0.13331	0.43433
GO:0016241	regulation of macroautophagy	26	8	4.53	609	0.06905	0.43434
GO:0007296	vitellogenesis	9	5	1.57	257	0.01084	0.43435
GO:0009407	toxin catabolic process	9	5	1.57	258	0.01084	0.43435
GO:0060810	intracellular mRNA localization involved in pattern specification process	63	14	10.98	1166	0.19759	0.43444
GO:0019094	pole plasm mRNA localization	52	12	9.07	1116	0.18355	0.43447
GO:0022404	molting cycle process	53	12	9.24	1179	0.20204	0.43451
GO:0032786	positive regulation of DNA-templated transcription, elongation	19	6	3.31	759	0.09802	0.43454
GO:0010469	regulation of signaling receptor activity	8	4	1.39	460	0.03562	0.43457
GO:0046173	polyol biosynthetic process	14	5	2.44	701	0.08086	0.43458
GO:0032006	regulation of TOR signaling	43	10	7.5	1194	0.20517	0.43458
GO:0008078	mesodermal cell migration	15	5	2.62	781	0.10458	0.43462
GO:0035069	larval midgut histolysis	27	7	4.71	1075	0.178	0.43464
GO:1903364	positive regulation of cellular protein catabolic process	27	7	4.71	1076	0.178	0.43464
GO:0090329	regulation of DNA-dependent DNA replication	16	5	2.79	917	0.13129	0.43467
GO:0006865	amino acid transport	40	9	6.97	1365	0.25326	0.43471
GO:0007091	metaphase/anaphase transition of mitotic cell cycle	29	7	5.06	1308	0.23122	0.43473
GO:0009566	fertilization	29	7	5.06	1309	0.23122	0.43473
GO:0043487	regulation of RNA stability	13	4	2.27	1089	0.17814	0.43479
GO:0008052	sensory organ boundary specification	19	5	3.31	1284	0.22622	0.4348
GO:0001707	mesoderm formation	25	6	4.36	1401	0.26149	0.43481
GO:0051647	nucleus localization	37	8	6.45	1580	0.31124	0.43483
GO:0048619	embryonic hindgut morphogenesis	43	9	7.5	1612	0.3299	0.43484
GO:0098876	vesicle-mediated transport to the plasma membrane	26	6	4.53	1506	0.29386	0.43486
GO:0043624	cellular protein complex disassembly	39	8	6.8	1760	0.36778	0.43492
GO:0090162	establishment of epithelial cell polarity	16	4	2.79	1554	0.30017	0.43493
GO:0002183	cytoplasmic translational initiation	11	3	1.92	1527	0.29792	0.43496
GO:0061319	nephrocyte differentiation	11	3	1.92	1528	0.29792	0.43496
GO:0009954	proximal/distal pattern formation	23	5	4.01	1773	0.37262	0.43498
GO:0055069	zinc ion homeostasis	12	3	2.09	1664	0.34992	0.43501
GO:0061647	histone H3-K9 modification	12	3	2.09	1665	0.34992	0.43501
GO:0055072	iron ion homeostasis	13	3	2.27	1829	0.40146	0.43505
GO:0000038	very long-chain fatty acid metabolic process	19	4	3.31	1924	0.42876	0.43506
GO:0035223	leg disc pattern formation	19	4	3.31	1925	0.42876	0.43506
GO:0042044	fluid transport	25	5	4.36	1948	0.44728	0.43507
GO:0030042	actin filament depolymerization	8	2	1.39	1890	0.41923	0.43508
GO:0046686	response to cadmium ion	8	2	1.39	1891	0.41923	0.43508
GO:0010942	positive regulation of cell death	83	15	14.47	2074	0.4841	0.43508
GO:1903321	negative regulation of protein modification by small protein conjugation or removal	9	2	1.57	2024	0.48287	0.43513
GO:0007162	negative regulation of cell adhesion	15	3	2.62	2092	0.50019	0.43514
GO:0035265	organ growth	67	12	11.68	2115	0.50937	0.43514
GO:0050982	detection of mechanical stimulus	10	2	1.74	2158	0.54199	0.43517
GO:0006584	catecholamine metabolic process	16	3	2.79	2201	0.54635	0.43518
GO:0044242	cellular lipid catabolic process	74	13	12.9	2152	0.53608	0.4352
GO:0006694	steroid biosynthetic process	28	5	4.88	2248	0.55401	0.43521
GO:1902875	regulation of embryonic pattern specification	28	5	4.88	2249	0.55401	0.43521
GO:0045861	negative regulation of proteolysis	34	6	5.93	2255	0.55749	0.43522
GO:0048194	Golgi vesicle budding	11	2	1.92	2323	0.59623	0.43522
GO:0097090	presynaptic membrane organization	11	2	1.92	2324	0.59623	0.43522
GO:0010165	response to X-ray	12	2	2.09	2565	0.6455	0.43526
GO:0090174	organelle membrane fusion	70	12	12.2	2278	0.57524	0.43528
GO:0051270	regulation of cellular component movement	53	9	9.24	2314	0.59147	0.43529
GO:0016310	phosphorylation	535	116	93.27	180	0.00517	0.43529
GO:1900006	positive regulation of dendrite development	13	2	2.27	2750	0.68987	0.43531
GO:0048079	regulation of cuticle pigmentation	14	2	2.44	2834	0.72955	0.43535
GO:0018208	peptidyl-proline modification	24	3	4.18	3131	0.81531	0.43554
GO:0045747	positive regulation of Notch signaling pathway	36	7	6.28	1942	0.44198	0.43558
GO:0042462	eye photoreceptor cell development	98	15	17.09	2971	0.75092	0.43576
GO:0042440	pigment metabolic process	117	15	20.4	3458	0.93087	0.43663
GO:0046483	heterocycle metabolic process	2145	360	373.96	3225	0.83215	0.43946
GO:0016311	dephosphorylation	141	28	24.58	1363	0.25242	0.43995
GO:0030163	protein catabolic process	275	62	47.94	300	0.01624	0.44043
GO:0007399	nervous system development	1002	191	174.69	696	0.08052	0.44107
GO:0007157	heterophilic cell-cell adhesion via plasma membrane cell adhesion molecules	25	5	4.36	1949	0.44728	0.44192
GO:0042147	retrograde transport, endosome to Golgi	25	5	4.36	1950	0.44728	0.44192
GO:0046329	negative regulation of JNK cascade	25	5	4.36	1951	0.44728	0.44192
GO:0006816	calcium ion transport	55	17	9.59	234	0.01012	0.44415
GO:0007314	oocyte anterior/posterior axis specification	84	18	14.64	1178	0.20164	0.44621
GO:0045732	positive regulation of protein catabolic process	41	10	7.15	1042	0.1646	0.44649
GO:0016334	establishment or maintenance of polarity of follicular epithelium	26	7	4.53	1014	0.15357	0.4467
GO:0001751	compound eye photoreceptor cell differentiation	157	28	27.37	2019	0.48024	0.44757
GO:0007032	endosome organization	14	3	2.44	1967	0.45175	0.44768
GO:0007527	adult somatic muscle development	14	3	2.44	1968	0.45175	0.44768
GO:0030308	negative regulation of cell growth	14	3	2.44	1969	0.45175	0.44768
GO:0030514	negative regulation of BMP signaling pathway	14	3	2.44	1970	0.45175	0.44768
GO:0036098	male germ-line stem cell population maintenance	14	3	2.44	1971	0.45175	0.44768
GO:0044804	autophagy of nucleus	14	3	2.44	1972	0.45175	0.44768
GO:0050806	positive regulation of synaptic transmission	14	3	2.44	1973	0.45175	0.44768
GO:1905515	non-motile cilium assembly	14	3	2.44	1974	0.45175	0.44768
GO:0009411	response to UV	26	5	4.53	2065	0.48381	0.44772
GO:0042742	defense response to bacterium	159	32	27.72	1205	0.21004	0.45239
GO:0043252	sodium-independent organic anion transport	31	6	5.4	1991	0.46126	0.45529
GO:0035556	intracellular signal transduction	619	117	107.92	1057	0.17153	0.45717
GO:0008407	chaeta morphogenesis	37	7	6.45	2011	0.47248	0.46596
GO:0042335	cuticle development	153	33	26.67	818	0.10697	0.47701
GO:0030111	regulation of Wnt signaling pathway	78	19	13.6	662	0.07492	0.47746
GO:0035172	hemocyte proliferation	44	13	7.67	440	0.03305	0.47751
GO:0009952	anterior/posterior pattern specification	154	32	26.85	1023	0.15901	0.47751
GO:0016049	cell growth	145	30	25.28	1066	0.17464	0.4777
GO:0044087	regulation of cellular component biogenesis	286	54	49.86	1426	0.27821	0.47785
GO:0016319	mushroom body development	66	12	11.51	2079	0.48679	0.4781
GO:0031122	cytoplasmic microtubule organization	26	5	4.53	2066	0.48381	0.47832
GO:0070328	triglyceride homeostasis	26	5	4.53	2067	0.48381	0.47832
GO:0090630	activation of GTPase activity	26	5	4.53	2068	0.48381	0.47832
GO:0110020	regulation of actomyosin structure organization	16	4	2.79	1555	0.30017	0.47924
GO:0046777	protein autophosphorylation	40	6	6.97	2826	0.72096	0.47931
GO:0045476	nurse cell apoptotic process	19	4	3.31	1926	0.42876	0.47945
GO:0042594	response to starvation	117	24	20.4	1274	0.2199	0.47946
GO:0000338	protein deneddylation	9	2	1.57	2025	0.48287	0.47956
GO:0006020	inositol metabolic process	9	2	1.57	2026	0.48287	0.47956
GO:0007060	male meiosis chromosome segregation	9	2	1.57	2027	0.48287	0.47956
GO:0007440	foregut morphogenesis	9	2	1.57	2028	0.48287	0.47956
GO:0007458	progression of morphogenetic furrow involved in compound eye morphogenesis	9	2	1.57	2029	0.48287	0.47956
GO:0016204	determination of muscle attachment site	9	2	1.57	2030	0.48287	0.47956
GO:0031629	synaptic vesicle fusion to presynaptic active zone membrane	9	2	1.57	2031	0.48287	0.47956
GO:0034334	adherens junction maintenance	9	2	1.57	2032	0.48287	0.47956
GO:0043407	negative regulation of MAP kinase activity	9	2	1.57	2033	0.48287	0.47956
GO:0046672	positive regulation of compound eye retinal cell programmed cell death	9	2	1.57	2034	0.48287	0.47956
GO:0048036	central complex development	9	2	1.57	2035	0.48287	0.47956
GO:0048790	maintenance of presynaptic active zone structure	9	2	1.57	2036	0.48287	0.47956
GO:0051567	histone H3-K9 methylation	9	2	1.57	2037	0.48287	0.47956
GO:0060250	germ-line stem-cell niche homeostasis	9	2	1.57	2038	0.48287	0.47956
GO:0060401	cytosolic calcium ion transport	9	2	1.57	2039	0.48287	0.47956
GO:0060439	trachea morphogenesis	9	2	1.57	2040	0.48287	0.47956
GO:0071028	nuclear mRNA surveillance	9	2	1.57	2041	0.48287	0.47956
GO:0090328	regulation of olfactory learning	9	2	1.57	2042	0.48287	0.47956
GO:0097150	neuronal stem cell population maintenance	9	2	1.57	2043	0.48287	0.47956
GO:1900074	negative regulation of neuromuscular synaptic transmission	9	2	1.57	2044	0.48287	0.47956
GO:0051298	centrosome duplication	34	6	5.93	2256	0.55749	0.4797
GO:0046621	negative regulation of organ growth	18	3	3.14	2525	0.63067	0.4798
GO:0006790	sulfur compound metabolic process	134	22	23.36	2605	0.65809	0.48027
GO:0045089	positive regulation of innate immune response	49	12	8.54	926	0.13331	0.48569
GO:0007443	Malpighian tubule morphogenesis	40	8	6.97	1816	0.39641	0.48755
GO:0007156	homophilic cell adhesion via plasma membrane adhesion molecules	32	6	5.58	2085	0.49409	0.48802
GO:0007406	negative regulation of neuroblast proliferation	32	6	5.58	2086	0.49409	0.48802
GO:0007010	cytoskeleton organization	543	117	94.67	196	0.00614	0.49131
GO:0045197	establishment or maintenance of epithelial cell apical/basal polarity	31	7	5.4	1497	0.28895	0.49535
GO:0035186	syncytial blastoderm mitotic cell cycle	21	5	3.66	1540	0.29794	0.49549
GO:0045746	negative regulation of Notch signaling pathway	38	7	6.62	2111	0.50255	0.49594
GO:0006730	one-carbon metabolic process	15	3	2.62	2093	0.50019	0.49599
GO:0007080	mitotic metaphase plate congression	15	3	2.62	2094	0.50019	0.49599
GO:0008543	fibroblast growth factor receptor signaling pathway	15	3	2.62	2095	0.50019	0.49599
GO:0016348	imaginal disc-derived leg joint morphogenesis	15	3	2.62	2096	0.50019	0.49599
GO:0030713	ovarian follicle cell stalk formation	15	3	2.62	2097	0.50019	0.49599
GO:0035690	cellular response to drug	15	3	2.62	2098	0.50019	0.49599
GO:0046627	negative regulation of insulin receptor signaling pathway	15	3	2.62	2099	0.50019	0.49599
GO:0046330	positive regulation of JNK cascade	21	4	3.66	2118	0.51118	0.49602
GO:0042067	establishment of ommatidial planar polarity	56	10	9.76	2141	0.52179	0.49605
GO:0097164	ammonium ion metabolic process	33	6	5.75	2144	0.52622	0.49606
GO:0006397	mRNA processing	288	45	50.21	3141	0.81608	0.49889
GO:0008586	imaginal disc-derived wing vein morphogenesis	44	8	7.67	2117	0.50977	0.50268
GO:0031532	actin cytoskeleton reorganization	28	6	4.88	1751	0.36052	0.50577
GO:0007390	germ-band shortening	21	4	3.66	2119	0.51118	0.50625
GO:0007632	visual behavior	21	4	3.66	2120	0.51118	0.50625
GO:0033627	cell adhesion mediated by integrin	21	4	3.66	2121	0.51118	0.50625
GO:0045879	negative regulation of smoothened signaling pathway	21	4	3.66	2122	0.51118	0.50625
GO:1901570	fatty acid derivative biosynthetic process	21	4	3.66	2123	0.51118	0.50625
GO:0007444	imaginal disc development	516	98	89.96	1108	0.18221	0.50778
GO:0048856	anatomical structure development	2269	455	395.58	49	6.7e-05	0.50821
GO:0019730	antimicrobial humoral response	80	10	13.95	3424	0.91093	0.50888
GO:0006378	mRNA polyadenylation	27	5	4.71	2135	0.51946	0.51389
GO:0070050	neuron cellular homeostasis	27	5	4.71	2136	0.51946	0.51389
GO:0045793	positive regulation of cell size	33	6	5.75	2145	0.52622	0.52009
GO:0046331	lateral inhibition	33	6	5.75	2146	0.52622	0.52009
GO:0008219	cell death	355	82	61.89	152	0.00324	0.52705
GO:0098662	inorganic cation transmembrane transport	135	43	23.54	41	2.8e-05	0.52747
GO:0043069	negative regulation of programmed cell death	114	36	19.87	69	0.00015	0.52846
GO:0051188	cofactor biosynthetic process	94	30	16.39	93	0.00043	0.5292
GO:0007568	aging	146	38	25.45	183	0.00555	0.52947
GO:0051093	negative regulation of developmental process	180	43	31.38	299	0.0161	0.52972
GO:0007617	mating behavior	88	26	15.34	156	0.00341	0.53006
GO:0060562	epithelial tube morphogenesis	420	82	73.22	945	0.13748	0.5304
GO:0010033	response to organic substance	446	98	77.76	198	0.00663	0.53045
GO:0014070	response to organic cyclic compound	117	29	20.4	405	0.02706	0.53064
GO:0007635	chemosensory behavior	72	21	12.55	223	0.0094	0.53071
GO:0046394	carboxylic acid biosynthetic process	103	26	17.96	412	0.02829	0.53081
GO:0045937	positive regulation of phosphate metabolic process	155	34	27.02	721	0.08575	0.53109
GO:0042327	positive regulation of phosphorylation	146	32	25.45	749	0.09406	0.53122
GO:1904396	regulation of neuromuscular junction development	102	24	17.78	644	0.0704	0.53134
GO:0042386	hemocyte differentiation	40	13	6.97	286	0.01502	0.53142
GO:0071310	cellular response to organic substance	267	52	46.55	1202	0.20663	0.53148
GO:0031667	response to nutrient levels	134	29	23.36	882	0.12052	0.53149
GO:0030539	male genitalia development	21	9	3.66	192	0.00572	0.53163
GO:0060828	regulation of canonical Wnt signaling pathway	57	15	9.94	584	0.06021	0.53169
GO:0098661	inorganic anion transmembrane transport	28	9	4.88	507	0.04275	0.53197
GO:0031929	TOR signaling	58	14	10.11	885	0.12165	0.53203
GO:0035171	lamellocyte differentiation	14	6	2.44	371	0.02344	0.53214
GO:0043901	negative regulation of multi-organism process	31	8	5.4	1025	0.15909	0.53241
GO:0044275	cellular carbohydrate catabolic process	20	6	3.49	879	0.12034	0.53243
GO:0009247	glycolipid biosynthetic process	39	9	6.8	1292	0.22911	0.53252
GO:0060581	cell fate commitment involved in pattern specification	28	7	4.88	1191	0.20395	0.53254
GO:0008363	larval chitin-based cuticle development	23	6	4.01	1174	0.20006	0.53258
GO:0051965	positive regulation of synapse assembly	31	7	5.4	1498	0.28895	0.53269
GO:0007215	glutamate receptor signaling pathway	9	3	1.57	1161	0.19648	0.53275
GO:1905330	regulation of morphogenesis of an epithelium	21	5	3.66	1541	0.29794	0.53277
GO:0050000	chromosome localization	27	6	4.71	1606	0.32697	0.53278
GO:0044057	regulation of system process	51	10	8.89	1814	0.3963	0.53283
GO:0016556	mRNA modification	11	3	1.92	1529	0.29792	0.53284
GO:0030497	fatty acid elongation	17	4	2.96	1635	0.34309	0.53286
GO:0090101	negative regulation of transmembrane receptor protein serine/threonine kinase signaling pathway	23	5	4.01	1774	0.37262	0.53287
GO:0006490	oligosaccharide-lipid intermediate biosynthetic process	12	3	2.09	1666	0.34992	0.53289
GO:0043687	post-translational protein modification	12	3	2.09	1667	0.34992	0.53289
GO:0016482	cytosolic transport	53	10	9.24	1947	0.44699	0.53292
GO:0032386	regulation of intracellular transport	49	9	8.54	2081	0.48999	0.53301
GO:0006882	cellular zinc ion homeostasis	9	2	1.57	2045	0.48287	0.53303
GO:0009220	pyrimidine ribonucleotide biosynthetic process	9	2	1.57	2046	0.48287	0.53303
GO:0010639	negative regulation of organelle organization	79	14	13.77	2140	0.51967	0.53307
GO:0010822	positive regulation of mitochondrion organization	10	2	1.74	2159	0.54199	0.53308
GO:0035154	terminal cell fate specification, open tracheal system	10	2	1.74	2160	0.54199	0.53308
GO:0046113	nucleobase catabolic process	10	2	1.74	2161	0.54199	0.53308
GO:0048521	negative regulation of behavior	10	2	1.74	2162	0.54199	0.53308
GO:0060251	regulation of glial cell proliferation	10	2	1.74	2163	0.54199	0.53308
GO:0044106	cellular amine metabolic process	22	4	3.84	2229	0.55031	0.5331
GO:0097306	cellular response to alcohol	22	4	3.84	2230	0.55031	0.5331
GO:0042559	pteridine-containing compound biosynthetic process	11	2	1.92	2325	0.59623	0.53313
GO:1902653	secondary alcohol biosynthetic process	12	2	2.09	2566	0.6455	0.53318
GO:0070897	DNA-templated transcriptional preinitiation complex assembly	24	4	4.18	2509	0.62324	0.5332
GO:0000469	cleavage involved in rRNA processing	19	3	3.31	2610	0.66853	0.53324
GO:0007448	anterior/posterior pattern specification, imaginal disc	19	3	3.31	2611	0.66853	0.53324
GO:0047497	mitochondrion transport along microtubule	14	2	2.44	2835	0.72955	0.53328
GO:0051054	positive regulation of DNA metabolic process	20	3	3.49	2791	0.70346	0.53329
GO:0010632	regulation of epithelial cell migration	15	2	2.62	2988	0.76484	0.53333
GO:0007530	sex determination	26	3	4.53	3298	0.85634	0.53359
GO:0051336	regulation of hydrolase activity	171	28	29.81	2632	0.67518	0.53364
GO:0034728	nucleosome organization	48	6	8.37	3311	0.86579	0.53382
GO:0051171	regulation of nitrogen compound metabolic process	1574	271	274.41	2374	0.61242	0.53384
GO:0035218	leg disc development	97	14	16.91	3144	0.81978	0.53397
GO:0008652	cellular amino acid biosynthetic process	41	4	7.15	3484	0.94357	0.53404
GO:2000112	regulation of cellular macromolecule biosynthetic process	1121	189	195.43	2823	0.72061	0.53493
GO:0048584	positive regulation of response to stimulus	401	77	69.91	1124	0.18594	0.53532
GO:0002164	larval development	142	32	24.76	616	0.06945	0.53547
GO:0043408	regulation of MAPK cascade	141	30	24.58	942	0.13615	0.53627
GO:1901701	cellular response to oxygen-containing compound	118	24	20.57	1321	0.23321	0.53715
GO:0001558	regulation of cell growth	71	15	12.38	1358	0.24659	0.53753
GO:0051052	regulation of DNA metabolic process	61	13	10.63	1368	0.25671	0.53764
GO:0045448	mitotic cell cycle, embryonic	38	9	6.62	1198	0.20586	0.53765
GO:0050708	regulation of protein secretion	23	6	4.01	1175	0.20006	0.53783
GO:0030509	BMP signaling pathway	42	9	7.32	1567	0.30379	0.53795
GO:0030334	regulation of cell migration	33	7	5.75	1647	0.34949	0.53814
GO:0048072	compound eye pigmentation	17	4	2.96	1636	0.34309	0.53824
GO:0044550	secondary metabolite biosynthetic process	26	5	4.53	2069	0.48381	0.53848
GO:0002230	positive regulation of defense response to virus by host	10	2	1.74	2164	0.54199	0.53858
GO:0006879	cellular iron ion homeostasis	10	2	1.74	2165	0.54199	0.53858
GO:0007096	regulation of exit from mitosis	10	2	1.74	2166	0.54199	0.53858
GO:0016075	rRNA catabolic process	10	2	1.74	2167	0.54199	0.53858
GO:0030589	pseudocleavage involved in syncytial blastoderm formation	10	2	1.74	2168	0.54199	0.53858
GO:0031000	response to caffeine	10	2	1.74	2169	0.54199	0.53858
GO:0035160	maintenance of epithelial integrity, open tracheal system	10	2	1.74	2170	0.54199	0.53858
GO:0035225	determination of genital disc primordium	10	2	1.74	2171	0.54199	0.53858
GO:0042246	tissue regeneration	10	2	1.74	2172	0.54199	0.53858
GO:0042306	regulation of protein import into nucleus	10	2	1.74	2173	0.54199	0.53858
GO:0042766	nucleosome mobilization	10	2	1.74	2174	0.54199	0.53858
GO:0043153	entrainment of circadian clock by photoperiod	10	2	1.74	2175	0.54199	0.53858
GO:0043462	regulation of ATPase activity	10	2	1.74	2176	0.54199	0.53858
GO:0045198	establishment of epithelial cell apical/basal polarity	10	2	1.74	2177	0.54199	0.53858
GO:0046534	positive regulation of photoreceptor cell differentiation	10	2	1.74	2178	0.54199	0.53858
GO:0060967	negative regulation of gene silencing by RNA	10	2	1.74	2179	0.54199	0.53858
GO:0070509	calcium ion import	10	2	1.74	2180	0.54199	0.53858
GO:2001257	regulation of cation channel activity	10	2	1.74	2181	0.54199	0.53858
GO:0055070	copper ion homeostasis	16	3	2.79	2202	0.54635	0.53859
GO:0043277	apoptotic cell clearance	18	3	3.14	2526	0.63067	0.53874
GO:0007405	neuroblast proliferation	88	15	15.34	2280	0.58273	0.5388
GO:0010212	response to ionizing radiation	38	6	6.62	2624	0.67156	0.53894
GO:0043044	ATP-dependent chromatin remodeling	33	4	5.75	3264	0.85166	0.53943
GO:0008356	asymmetric cell division	98	22	17.09	876	0.12021	0.53949
GO:0000956	nuclear-transcribed mRNA catabolic process	57	8	9.94	3117	0.80065	0.5395
GO:0009953	dorsal/ventral pattern formation	131	27	22.84	1144	0.19564	0.53987
GO:0035010	encapsulation of foreign target	39	4	6.8	3454	0.92746	0.53988
GO:0031327	negative regulation of cellular biosynthetic process	393	65	68.52	2799	0.70475	0.5401
GO:0006486	protein glycosylation	89	19	15.52	1169	0.19831	0.54027
GO:0006727	ommochrome biosynthetic process	16	3	2.79	2203	0.54635	0.54208
GO:0007479	leg disc proximal/distal pattern formation	16	3	2.79	2204	0.54635	0.54208
GO:0007629	flight behavior	16	3	2.79	2205	0.54635	0.54208
GO:0035025	positive regulation of Rho protein signal transduction	16	3	2.79	2206	0.54635	0.54208
GO:0035073	pupariation	16	3	2.79	2207	0.54635	0.54208
GO:0042761	very long-chain fatty acid biosynthetic process	16	3	2.79	2208	0.54635	0.54208
GO:0045938	positive regulation of circadian sleep/wake cycle, sleep	16	3	2.79	2209	0.54635	0.54208
GO:0007264	small GTPase mediated signal transduction	219	43	38.18	1253	0.2155	0.54223
GO:0006974	cellular response to DNA damage stimulus	197	31	34.34	2986	0.76481	0.54393
GO:0016081	synaptic vesicle docking	22	4	3.84	2231	0.55031	0.54533
GO:0030433	ubiquitin-dependent ERAD pathway	22	4	3.84	2232	0.55031	0.54533
GO:0035050	embryonic heart tube development	22	4	3.84	2233	0.55031	0.54533
GO:0051260	protein homooligomerization	22	4	3.84	2234	0.55031	0.54533
GO:0051568	histone H3-K4 methylation	22	4	3.84	2235	0.55031	0.54533
GO:0007266	Rho protein signal transduction	52	9	9.07	2273	0.56693	0.54546
GO:0007623	circadian rhythm	150	29	26.15	1546	0.29911	0.54638
GO:0006836	neurotransmitter transport	125	23	21.79	1911	0.42373	0.54757
GO:0007420	brain development	102	19	17.78	1854	0.41483	0.5504
GO:0009306	protein secretion	70	13	12.2	1959	0.44934	0.55347
GO:0042060	wound healing	82	20	14.3	607	0.0682	0.55383
GO:0016567	protein ubiquitination	165	40	28.77	291	0.01562	0.57331
GO:0008582	regulation of synaptic growth at neuromuscular junction	98	23	17.09	671	0.07711	0.57743
GO:0007349	cellularization	83	20	14.47	664	0.07576	0.57772
GO:0030717	oocyte karyosome formation	29	5	5.06	2284	0.58729	0.58171
GO:0090307	mitotic spindle assembly	29	5	5.06	2285	0.58729	0.58171
GO:0035159	regulation of tube length, open tracheal system	34	6	5.93	2257	0.55749	0.58268
GO:0045787	positive regulation of cell cycle	61	16	10.63	556	0.05488	0.58272
GO:0015718	monocarboxylic acid transport	23	4	4.01	2292	0.58772	0.58274
GO:0006950	response to stress	1030	197	179.57	615	0.06915	0.58363
GO:0017148	negative regulation of translation	75	10	13.08	3308	0.86484	0.5839
GO:0010883	regulation of lipid storage	30	7	5.23	1394	0.25963	0.58469
GO:0030536	larval feeding behavior	17	3	2.96	2306	0.58991	0.58563
GO:0035002	liquid clearance, open tracheal system	17	3	2.96	2307	0.58991	0.58563
GO:0016050	vesicle organization	121	21	21.1	2221	0.54714	0.58564
GO:0007017	microtubule-based process	360	77	62.76	409	0.02757	0.58619
GO:0007431	salivary gland development	122	33	21.27	178	0.00503	0.5876
GO:0007619	courtship behavior	60	22	10.46	78	0.00028	0.58776
GO:0098656	anion transmembrane transport	72	19	12.55	467	0.03662	0.58998
GO:0008595	anterior/posterior axis specification, embryo	119	27	20.75	717	0.08379	0.59002
GO:0003015	heart process	39	9	6.8	1293	0.22911	0.59185
GO:0034332	adherens junction organization	37	8	6.45	1581	0.31124	0.59213
GO:0007338	single fertilization	26	6	4.53	1507	0.29386	0.59217
GO:0007200	phospholipase C-activating G-protein coupled receptor signaling pathway	16	4	2.79	1556	0.30017	0.59229
GO:0006122	mitochondrial electron transport, ubiquinol to cytochrome c	11	2	1.92	2326	0.59623	0.59278
GO:0006919	activation of cysteine-type endopeptidase activity involved in apoptotic process	11	2	1.92	2327	0.59623	0.59278
GO:0007295	growth of a germarium-derived egg chamber	11	2	1.92	2328	0.59623	0.59278
GO:0007380	specification of segmental identity, head	11	2	1.92	2329	0.59623	0.59278
GO:0007394	dorsal closure, elongation of leading edge cells	11	2	1.92	2330	0.59623	0.59278
GO:0007412	axon target recognition	11	2	1.92	2331	0.59623	0.59278
GO:0007615	anesthesia-resistant memory	11	2	1.92	2332	0.59623	0.59278
GO:0007638	mechanosensory behavior	11	2	1.92	2333	0.59623	0.59278
GO:0018242	protein O-linked glycosylation via serine	11	2	1.92	2334	0.59623	0.59278
GO:0031062	positive regulation of histone methylation	11	2	1.92	2335	0.59623	0.59278
GO:0032465	regulation of cytokinesis	11	2	1.92	2336	0.59623	0.59278
GO:0035076	ecdysone receptor-mediated signaling pathway	11	2	1.92	2337	0.59623	0.59278
GO:0035158	regulation of tube diameter, open tracheal system	11	2	1.92	2338	0.59623	0.59278
GO:0042676	compound eye cone cell fate commitment	11	2	1.92	2339	0.59623	0.59278
GO:0045116	protein neddylation	11	2	1.92	2340	0.59623	0.59278
GO:0046959	habituation	11	2	1.92	2341	0.59623	0.59278
GO:0051181	cofactor transport	11	2	1.92	2342	0.59623	0.59278
GO:0061343	cell adhesion involved in heart morphogenesis	11	2	1.92	2343	0.59623	0.59278
GO:0061723	glycophagy	11	2	1.92	2344	0.59623	0.59278
GO:0071230	cellular response to amino acid stimulus	11	2	1.92	2345	0.59623	0.59278
GO:0030301	cholesterol transport	18	3	3.14	2527	0.63067	0.59287
GO:0031937	positive regulation of chromatin silencing	18	3	3.14	2528	0.63067	0.59287
GO:0051123	RNA polymerase II transcriptional preinitiation complex assembly	20	3	3.49	2792	0.70346	0.59302
GO:0000278	mitotic cell cycle	430	87	74.97	605	0.06776	0.59392
GO:0006399	tRNA metabolic process	126	14	21.97	3565	0.98207	0.59626
GO:0006464	cellular protein modification process	1071	206	186.72	550	0.0531	0.59707
GO:0009653	anatomical structure morphogenesis	1340	279	233.62	75	0.00025	0.59733
GO:0048468	cell development	1241	254	216.36	120	0.00144	0.60039
GO:1901566	organonitrogen compound biosynthetic process	857	131	149.41	3531	0.96577	0.60129
GO:0044248	cellular catabolic process	744	160	129.71	122	0.00155	0.60394
GO:0008610	lipid biosynthetic process	168	41	29.29	274	0.01297	0.61051
GO:0007611	learning or memory	149	37	25.98	277	0.01344	0.61073
GO:0002009	morphogenesis of an epithelium	539	100	93.97	1367	0.25569	0.61202
GO:0043410	positive regulation of MAPK cascade	91	22	15.86	597	0.0629	0.61223
GO:0010557	positive regulation of macromolecule biosynthetic process	387	73	67.47	1333	0.24258	0.61226
GO:0046474	glycerophospholipid biosynthetic process	46	14	8.02	362	0.0214	0.6123
GO:0046488	phosphatidylinositol metabolic process	66	17	11.51	570	0.05689	0.61244
GO:0007612	learning	61	16	10.63	557	0.05488	0.61248
GO:0006898	receptor-mediated endocytosis	34	11	5.93	385	0.02519	0.61258
GO:0051651	maintenance of location in cell	34	11	5.93	386	0.02519	0.61258
GO:0006165	nucleoside diphosphate phosphorylation	24	9	4.18	290	0.01553	0.61266
GO:0000165	MAPK cascade	159	32	27.72	1206	0.21004	0.61275
GO:1902531	regulation of intracellular signal transduction	351	65	61.19	1587	0.31322	0.61281
GO:0007315	pole plasm assembly	64	15	11.16	938	0.13552	0.61293
GO:0042063	gliogenesis	73	16	12.73	1142	0.19248	0.61309
GO:0051129	negative regulation of cellular component organization	139	27	24.23	1545	0.29858	0.61322
GO:0034243	regulation of transcription elongation from RNA polymerase II promoter	21	6	3.66	980	0.14493	0.61339
GO:0042684	cardioblast cell fate commitment	10	4	1.74	692	0.08001	0.61342
GO:0016056	rhodopsin mediated signaling pathway	22	6	3.84	1061	0.17158	0.61344
GO:0071322	cellular response to carbohydrate stimulus	11	4	1.92	838	0.10899	0.61347
GO:0072666	establishment of protein localization to vacuole	17	5	2.96	1029	0.16071	0.61348
GO:0035162	embryonic hemopoiesis	23	6	4.01	1176	0.20006	0.61349
GO:0045786	negative regulation of cell cycle	94	18	16.39	1764	0.37062	0.61358
GO:0072329	monocarboxylic acid catabolic process	48	10	8.37	1596	0.32106	0.61359
GO:0007522	visceral muscle development	14	4	2.44	1262	0.21705	0.61362
GO:0008345	larval locomotory behavior	30	5	5.23	2500	0.61917	0.61363
GO:1900425	negative regulation of defense response to bacterium	10	3	1.74	1351	0.24639	0.61371
GO:0007275	multicellular organism development	1999	392	348.5	126	0.00184	0.61372
GO:0010821	regulation of mitochondrion organization	22	5	3.84	1620	0.33511	0.61373
GO:0050905	neuromuscular process	11	3	1.92	1530	0.29792	0.61376
GO:0010628	positive regulation of gene expression	405	77	70.61	1252	0.2127	0.61378
GO:0000054	ribosomal subunit export from nucleus	12	3	2.09	1668	0.34992	0.61381
GO:0031365	N-terminal protein amino acid modification	13	3	2.27	1830	0.40146	0.61386
GO:0060968	regulation of gene silencing	71	13	12.38	2005	0.47129	0.61388
GO:0071214	cellular response to abiotic stimulus	71	13	12.38	2006	0.47129	0.61388
GO:0042058	regulation of epidermal growth factor receptor signaling pathway	48	9	8.37	1996	0.46353	0.61388
GO:0072384	organelle transport along microtubule	26	5	4.53	2070	0.48381	0.61394
GO:0010669	epithelial structure maintenance	15	3	2.62	2100	0.50019	0.61397
GO:0045666	positive regulation of neuron differentiation	50	9	8.72	2127	0.51611	0.61399
GO:0006826	iron ion transport	10	2	1.74	2182	0.54199	0.61401
GO:0030730	sequestering of triglyceride	10	2	1.74	2183	0.54199	0.61401
GO:0031125	rRNA 3'-end processing	10	2	1.74	2184	0.54199	0.61401
GO:0045477	regulation of nurse cell apoptotic process	10	2	1.74	2185	0.54199	0.61401
GO:0051125	regulation of actin nucleation	10	2	1.74	2186	0.54199	0.61401
GO:1900371	regulation of purine nucleotide biosynthetic process	10	2	1.74	2187	0.54199	0.61401
GO:1905881	positive regulation of oogenesis	10	2	1.74	2188	0.54199	0.61401
GO:0050768	negative regulation of neurogenesis	62	11	10.81	2147	0.52694	0.61401
GO:0042045	epithelial fluid transport	22	4	3.84	2236	0.55031	0.61403
GO:0000393	spliceosomal conformational changes to generate catalytic conformation	5	1	0.87	2382	0.61639	0.61404
GO:0000467	exonucleolytic trimming to generate mature 3'-end of 5.8S rRNA from tricistronic rRNA transcript (SS...	5	1	0.87	2383	0.61639	0.61404
GO:0000491	small nucleolar ribonucleoprotein complex assembly	5	1	0.87	2384	0.61639	0.61404
GO:0001539	cilium or flagellum-dependent cell motility	5	1	0.87	2385	0.61639	0.61404
GO:0002701	negative regulation of production of molecular mediator of immune response	5	1	0.87	2386	0.61639	0.61404
GO:0006183	GTP biosynthetic process	5	1	0.87	2387	0.61639	0.61404
GO:0006241	CTP biosynthetic process	5	1	0.87	2388	0.61639	0.61404
GO:0006537	glutamate biosynthetic process	5	1	0.87	2389	0.61639	0.61404
GO:0006563	L-serine metabolic process	5	1	0.87	2390	0.61639	0.61404
GO:0006591	ornithine metabolic process	5	1	0.87	2391	0.61639	0.61404
GO:0006596	polyamine biosynthetic process	5	1	0.87	2392	0.61639	0.61404
GO:0006684	sphingomyelin metabolic process	5	1	0.87	2393	0.61639	0.61404
GO:0006895	Golgi to endosome transport	5	1	0.87	2394	0.61639	0.61404
GO:0006901	vesicle coating	5	1	0.87	2395	0.61639	0.61404
GO:0007004	telomere maintenance via telomerase	5	1	0.87	2396	0.61639	0.61404
GO:0007130	synaptonemal complex assembly	5	1	0.87	2397	0.61639	0.61404
GO:0007205	protein kinase C-activating G-protein coupled receptor signaling pathway	5	1	0.87	2398	0.61639	0.61404
GO:0007211	octopamine or tyramine signaling pathway	5	1	0.87	2399	0.61639	0.61404
GO:0007313	maternal specification of dorsal/ventral axis, oocyte, soma encoded	5	1	0.87	2400	0.61639	0.61404
GO:0007553	regulation of ecdysteroid metabolic process	5	1	0.87	2401	0.61639	0.61404
GO:0007563	regulation of eclosion	5	1	0.87	2402	0.61639	0.61404
GO:0007589	body fluid secretion	5	1	0.87	2403	0.61639	0.61404
GO:0008335	female germline ring canal stabilization	5	1	0.87	2404	0.61639	0.61404
GO:0009221	pyrimidine deoxyribonucleotide biosynthetic process	5	1	0.87	2405	0.61639	0.61404
GO:0009301	snRNA transcription	5	1	0.87	2406	0.61639	0.61404
GO:0009415	response to water	5	1	0.87	2407	0.61639	0.61404
GO:0010889	regulation of sequestering of triglyceride	5	1	0.87	2408	0.61639	0.61404
GO:0015868	purine ribonucleotide transport	5	1	0.87	2409	0.61639	0.61404
GO:0016200	synaptic target attraction	5	1	0.87	2410	0.61639	0.61404
GO:0019099	female germ-line sex determination	5	1	0.87	2411	0.61639	0.61404
GO:0030104	water homeostasis	5	1	0.87	2412	0.61639	0.61404
GO:0030702	chromatin silencing at centromere	5	1	0.87	2413	0.61639	0.61404
GO:0030834	regulation of actin filament depolymerization	5	1	0.87	2414	0.61639	0.61404
GO:0031113	regulation of microtubule polymerization	5	1	0.87	2415	0.61639	0.61404
GO:0031468	nuclear envelope reassembly	5	1	0.87	2416	0.61639	0.61404
GO:0032053	ciliary basal body organization	5	1	0.87	2417	0.61639	0.61404
GO:0032351	negative regulation of hormone metabolic process	5	1	0.87	2418	0.61639	0.61404
GO:0034059	response to anoxia	5	1	0.87	2419	0.61639	0.61404
GO:0034227	tRNA thio-modification	5	1	0.87	2420	0.61639	0.61404
GO:0034284	response to monosaccharide	5	1	0.87	2421	0.61639	0.61404
GO:0034315	regulation of Arp2/3 complex-mediated actin nucleation	5	1	0.87	2422	0.61639	0.61404
GO:0034755	iron ion transmembrane transport	5	1	0.87	2423	0.61639	0.61404
GO:0035193	larval central nervous system remodeling	5	1	0.87	2424	0.61639	0.61404
GO:0035263	genital disc sexually dimorphic development	5	1	0.87	2425	0.61639	0.61404
GO:0040016	embryonic cleavage	5	1	0.87	2426	0.61639	0.61404
GO:0042689	regulation of crystal cell differentiation	5	1	0.87	2427	0.61639	0.61404
GO:0043174	nucleoside salvage	5	1	0.87	2428	0.61639	0.61404
GO:0043555	regulation of translation in response to stress	5	1	0.87	2429	0.61639	0.61404
GO:0045022	early endosome to late endosome transport	5	1	0.87	2430	0.61639	0.61404
GO:0045069	regulation of viral genome replication	5	1	0.87	2431	0.61639	0.61404
GO:0045464	R8 cell fate specification	5	1	0.87	2432	0.61639	0.61404
GO:0045850	positive regulation of nurse cell apoptotic process	5	1	0.87	2433	0.61639	0.61404
GO:0045948	positive regulation of translational initiation	5	1	0.87	2434	0.61639	0.61404
GO:0046663	dorsal closure, leading edge cell differentiation	5	1	0.87	2435	0.61639	0.61404
GO:0046833	positive regulation of RNA export from nucleus	5	1	0.87	2436	0.61639	0.61404
GO:0046887	positive regulation of hormone secretion	5	1	0.87	2437	0.61639	0.61404
GO:0048052	R1/R6 cell differentiation	5	1	0.87	2438	0.61639	0.61404
GO:0048104	establishment of body hair or bristle planar orientation	5	1	0.87	2439	0.61639	0.61404
GO:0048209	regulation of vesicle targeting, to, from or within Golgi	5	1	0.87	2440	0.61639	0.61404
GO:0048383	mesectoderm development	5	1	0.87	2441	0.61639	0.61404
GO:0048525	negative regulation of viral process	5	1	0.87	2442	0.61639	0.61404
GO:0050881	musculoskeletal movement	5	1	0.87	2443	0.61639	0.61404
GO:0050916	sensory perception of sweet taste	5	1	0.87	2444	0.61639	0.61404
GO:0051013	microtubule severing	5	1	0.87	2445	0.61639	0.61404
GO:0051291	protein heterooligomerization	5	1	0.87	2446	0.61639	0.61404
GO:0051418	microtubule nucleation by microtubule organizing center	5	1	0.87	2447	0.61639	0.61404
GO:0051503	adenine nucleotide transport	5	1	0.87	2448	0.61639	0.61404
GO:0060213	positive regulation of nuclear-transcribed mRNA poly(A) tail shortening	5	1	0.87	2449	0.61639	0.61404
GO:0060323	head morphogenesis	5	1	0.87	2450	0.61639	0.61404
GO:0060395	SMAD protein signal transduction	5	1	0.87	2451	0.61639	0.61404
GO:0061088	regulation of sequestering of zinc ion	5	1	0.87	2452	0.61639	0.61404
GO:0070059	intrinsic apoptotic signaling pathway in response to endoplasmic reticulum stress	5	1	0.87	2453	0.61639	0.61404
GO:0070127	tRNA aminoacylation for mitochondrial protein translation	5	1	0.87	2454	0.61639	0.61404
GO:0070936	protein K48-linked ubiquitination	5	1	0.87	2455	0.61639	0.61404
GO:0071051	polyadenylation-dependent snoRNA 3'-end processing	5	1	0.87	2456	0.61639	0.61404
GO:0071243	cellular response to arsenic-containing substance	5	1	0.87	2457	0.61639	0.61404
GO:0071276	cellular response to cadmium ion	5	1	0.87	2458	0.61639	0.61404
GO:0071689	muscle thin filament assembly	5	1	0.87	2459	0.61639	0.61404
GO:0072578	neurotransmitter-gated ion channel clustering	5	1	0.87	2460	0.61639	0.61404
GO:0072595	maintenance of protein localization in organelle	5	1	0.87	2461	0.61639	0.61404
GO:0090163	establishment of epithelial cell planar polarity	5	1	0.87	2462	0.61639	0.61404
GO:0090208	positive regulation of triglyceride metabolic process	5	1	0.87	2463	0.61639	0.61404
GO:0097327	response to antineoplastic agent	5	1	0.87	2464	0.61639	0.61404
GO:0097374	sensory neuron axon guidance	5	1	0.87	2465	0.61639	0.61404
GO:0099517	synaptic vesicle transport along microtubule	5	1	0.87	2466	0.61639	0.61404
GO:1900373	positive regulation of purine nucleotide biosynthetic process	5	1	0.87	2467	0.61639	0.61404
GO:1902969	mitotic DNA replication	5	1	0.87	2468	0.61639	0.61404
GO:1904666	regulation of ubiquitin protein ligase activity	5	1	0.87	2469	0.61639	0.61404
GO:1990748	cellular detoxification	5	1	0.87	2470	0.61639	0.61404
GO:1990834	response to odorant	5	1	0.87	2471	0.61639	0.61404
GO:2000785	regulation of autophagosome assembly	5	1	0.87	2472	0.61639	0.61404
GO:0090276	regulation of peptide hormone secretion	11	2	1.92	2346	0.59623	0.61406
GO:2000242	negative regulation of reproductive process	11	2	1.92	2347	0.59623	0.61406
GO:0045930	negative regulation of mitotic cell cycle	63	11	10.98	2225	0.54997	0.61406
GO:0006911	phagocytosis, engulfment	13	2	2.27	2751	0.68987	0.61416
GO:0070816	phosphorylation of RNA polymerase II C-terminal domain	13	2	2.27	2752	0.68987	0.61416
GO:0030032	lamellipodium assembly	22	3	3.84	2981	0.76475	0.61432
GO:0006665	sphingolipid metabolic process	57	9	9.94	2639	0.6823	0.61434
GO:0030041	actin filament polymerization	58	9	10.11	2789	0.70296	0.6144
GO:0030149	sphingolipid catabolic process	18	2	3.14	3244	0.84764	0.61441
GO:0030705	cytoskeleton-dependent intracellular transport	65	10	11.33	2818	0.71834	0.61446
GO:0030706	germarium-derived oocyte differentiation	32	4	5.58	3227	0.83394	0.61454
GO:0006575	cellular modified amino acid metabolic process	68	9	11.86	3303	0.86106	0.61491
GO:0034249	negative regulation of cellular amide metabolic process	80	11	13.95	3241	0.84706	0.61493
GO:0034622	cellular protein-containing complex assembly	405	63	70.61	3307	0.86277	0.61517
GO:0050877	nervous system process	428	77	74.62	1819	0.39803	0.61638
GO:0000723	telomere maintenance	29	5	5.06	2286	0.58729	0.61822
GO:0006081	cellular aldehyde metabolic process	24	4	4.18	2510	0.62324	0.6183
GO:0006289	nucleotide-excision repair	24	4	4.18	2511	0.62324	0.6183
GO:2000331	regulation of terminal button organization	24	4	4.18	2512	0.62324	0.6183
GO:0043603	cellular amide metabolic process	566	65	98.68	3628	0.99998	0.62444
GO:0016070	RNA metabolic process	1632	254	284.52	3590	0.98902	0.62467
GO:0042332	gravitaxis	23	5	4.01	1775	0.37262	0.62582
GO:0007279	pole cell formation	18	3	3.14	2529	0.63067	0.62642
GO:0008594	photoreceptor cell morphogenesis	18	3	3.14	2530	0.63067	0.62642
GO:0030488	tRNA methylation	18	3	3.14	2531	0.63067	0.62642
GO:0050770	regulation of axonogenesis	43	5	7.5	3378	0.8917	0.62767
GO:0016477	cell migration	285	59	49.69	710	0.08264	0.63108
GO:0000082	G1/S transition of mitotic cell cycle	34	8	5.93	1306	0.23067	0.64113
GO:0017157	regulation of exocytosis	26	5	4.53	2071	0.48381	0.64183
GO:0006298	mismatch repair	12	2	2.09	2567	0.6455	0.64207
GO:0018243	protein O-linked glycosylation via threonine	12	2	2.09	2568	0.6455	0.64207
GO:0032483	regulation of Rab protein signal transduction	12	2	2.09	2569	0.6455	0.64207
GO:0045175	basal protein localization	12	2	2.09	2570	0.6455	0.64207
GO:0045450	bicoid mRNA localization	12	2	2.09	2571	0.6455	0.64207
GO:0071577	zinc ion transmembrane transport	12	2	2.09	2572	0.6455	0.64207
GO:0051259	protein complex oligomerization	38	6	6.62	2625	0.67156	0.64229
GO:0065004	protein-DNA complex assembly	61	8	10.63	3302	0.85753	0.64315
GO:0006606	protein import into nucleus	59	10	10.29	2319	0.59304	0.64398
GO:0007112	male meiosis cytokinesis	31	5	5.4	2588	0.64954	0.64408
GO:0042059	negative regulation of epidermal growth factor receptor signaling pathway	31	5	5.4	2589	0.64954	0.64408
GO:0006915	apoptotic process	257	55	44.81	558	0.05526	0.6451
GO:0061024	membrane organization	223	42	38.88	1589	0.31433	0.6496
GO:0007610	behavior	485	110	84.55	119	0.00138	0.64961
GO:0019233	sensory perception of pain	71	11	12.38	2811	0.71473	0.65183
GO:0007099	centriole replication	25	4	4.36	2596	0.65675	0.6519
GO:0007317	regulation of pole plasm oskar mRNA localization	25	4	4.36	2597	0.65675	0.6519
GO:0007029	endoplasmic reticulum organization	24	5	4.18	1843	0.41012	0.66377
GO:0001708	cell fate specification	75	13	13.08	2253	0.55712	0.66421
GO:0042051	compound eye photoreceptor development	94	14	16.39	3031	0.78193	0.66542
GO:0007030	Golgi organization	81	13	14.12	2629	0.67443	0.66582
GO:0051276	chromosome organization	514	84	89.61	3015	0.76708	0.66705
GO:0007281	germ cell development	627	140	109.31	98	0.00063	0.67197
GO:0016573	histone acetylation	74	11	12.9	3012	0.76539	0.67385
GO:1901575	organic substance catabolic process	666	136	116.11	357	0.02068	0.6744
GO:0023051	regulation of signaling	782	151	136.33	705	0.08102	0.67596
GO:1901137	carbohydrate derivative biosynthetic process	257	58	44.81	326	0.01923	0.67691
GO:0007274	neuromuscular synaptic transmission	70	13	12.2	1960	0.44934	0.67779
GO:0001654	eye development	355	71	61.89	850	0.11016	0.67808
GO:0009790	embryo development	477	91	83.16	1101	0.17991	0.6784
GO:0033043	regulation of organelle organization	363	69	63.29	1290	0.22819	0.67912
GO:0051321	meiotic cell cycle	197	39	34.34	1251	0.21255	0.67952
GO:0019359	nicotinamide nucleotide biosynthetic process	25	9	4.36	349	0.0206	0.67961
GO:0035070	salivary gland histolysis	36	10	6.28	713	0.08314	0.67987
GO:0043648	dicarboxylic acid metabolic process	26	8	4.53	610	0.06905	0.67995
GO:0032434	regulation of proteasomal ubiquitin-dependent protein catabolic process	24	7	4.18	845	0.10988	0.68014
GO:0007365	periodic partitioning	38	9	6.62	1199	0.20586	0.68027
GO:0010002	cardioblast differentiation	16	5	2.79	918	0.13129	0.68032
GO:0006084	acetyl-CoA metabolic process	11	4	1.92	839	0.10899	0.68036
GO:0072348	sulfur compound transport	15	4	2.62	1375	0.25795	0.68057
GO:0019674	NAD metabolic process	11	3	1.92	1531	0.29792	0.68065
GO:0031124	mRNA 3'-end processing	42	8	7.32	1982	0.45361	0.68076
GO:0010035	response to inorganic substance	50	9	8.72	2128	0.51611	0.68088
GO:0047496	vesicle transport along microtubule	11	2	1.92	2348	0.59623	0.68095
GO:0050909	sensory perception of taste	11	2	1.92	2349	0.59623	0.68095
GO:0006900	vesicle budding from membrane	17	3	2.96	2308	0.58991	0.68096
GO:0000335	negative regulation of transposition, DNA-mediated	6	1	1.05	2640	0.68331	0.68099
GO:0000972	transcription-dependent tethering of RNA polymerase II gene DNA at nuclear periphery	6	1	1.05	2641	0.68331	0.68099
GO:0001764	neuron migration	6	1	1.05	2642	0.68331	0.68099
GO:0006035	cuticle chitin biosynthetic process	6	1	1.05	2643	0.68331	0.68099
GO:0006145	purine nucleobase catabolic process	6	1	1.05	2644	0.68331	0.68099
GO:0006303	double-strand break repair via nonhomologous end joining	6	1	1.05	2645	0.68331	0.68099
GO:0006336	DNA replication-independent nucleosome assembly	6	1	1.05	2646	0.68331	0.68099
GO:0006384	transcription initiation from RNA polymerase III promoter	6	1	1.05	2647	0.68331	0.68099
GO:0006716	juvenile hormone metabolic process	6	1	1.05	2648	0.68331	0.68099
GO:0006878	cellular copper ion homeostasis	6	1	1.05	2649	0.68331	0.68099
GO:0006939	smooth muscle contraction	6	1	1.05	2650	0.68331	0.68099
GO:0007144	female meiosis I	6	1	1.05	2651	0.68331	0.68099
GO:0007299	ovarian follicle cell-cell adhesion	6	1	1.05	2652	0.68331	0.68099
GO:0007311	maternal specification of dorsal/ventral axis, oocyte, germ-line encoded	6	1	1.05	2653	0.68331	0.68099
GO:0007312	oocyte nucleus migration involved in oocyte dorsal/ventral axis specification	6	1	1.05	2654	0.68331	0.68099
GO:0007343	egg activation	6	1	1.05	2655	0.68331	0.68099
GO:0007425	epithelial cell fate determination, open tracheal system	6	1	1.05	2656	0.68331	0.68099
GO:0007451	dorsal/ventral lineage restriction, imaginal disc	6	1	1.05	2657	0.68331	0.68099
GO:0009303	rRNA transcription	6	1	1.05	2658	0.68331	0.68099
GO:0010032	meiotic chromosome condensation	6	1	1.05	2659	0.68331	0.68099
GO:0010862	positive regulation of pathway-restricted SMAD protein phosphorylation	6	1	1.05	2660	0.68331	0.68099
GO:0014067	negative regulation of phosphatidylinositol 3-kinase signaling	6	1	1.05	2661	0.68331	0.68099
GO:0015937	coenzyme A biosynthetic process	6	1	1.05	2662	0.68331	0.68099
GO:0016267	O-glycan processing, core 1	6	1	1.05	2663	0.68331	0.68099
GO:0016540	protein autoprocessing	6	1	1.05	2664	0.68331	0.68099
GO:0019433	triglyceride catabolic process	6	1	1.05	2665	0.68331	0.68099
GO:0030335	positive regulation of cell migration	6	1	1.05	2666	0.68331	0.68099
GO:0030513	positive regulation of BMP signaling pathway	6	1	1.05	2667	0.68331	0.68099
GO:0030950	establishment or maintenance of actin cytoskeleton polarity	6	1	1.05	2668	0.68331	0.68099
GO:0031397	negative regulation of protein ubiquitination	6	1	1.05	2669	0.68331	0.68099
GO:0032511	late endosome to vacuole transport via multivesicular body sorting pathway	6	1	1.05	2670	0.68331	0.68099
GO:0032785	negative regulation of DNA-templated transcription, elongation	6	1	1.05	2671	0.68331	0.68099
GO:0034067	protein localization to Golgi apparatus	6	1	1.05	2672	0.68331	0.68099
GO:0034497	protein localization to phagophore assembly site	6	1	1.05	2673	0.68331	0.68099
GO:0034551	mitochondrial respiratory chain complex III assembly	6	1	1.05	2674	0.68331	0.68099
GO:0035074	pupation	6	1	1.05	2675	0.68331	0.68099
GO:0035155	negative regulation of terminal cell fate specification, open tracheal system	6	1	1.05	2676	0.68331	0.68099
GO:0035156	fusion cell fate specification	6	1	1.05	2677	0.68331	0.68099
GO:0035721	intraciliary retrograde transport	6	1	1.05	2678	0.68331	0.68099
GO:0040019	positive regulation of embryonic development	6	1	1.05	2679	0.68331	0.68099
GO:0040031	snRNA modification	6	1	1.05	2680	0.68331	0.68099
GO:0043388	positive regulation of DNA binding	6	1	1.05	2681	0.68331	0.68099
GO:0043507	positive regulation of JUN kinase activity	6	1	1.05	2682	0.68331	0.68099
GO:0043519	regulation of myosin II filament organization	6	1	1.05	2683	0.68331	0.68099
GO:0043634	polyadenylation-dependent ncRNA catabolic process	6	1	1.05	2684	0.68331	0.68099
GO:0043649	dicarboxylic acid catabolic process	6	1	1.05	2685	0.68331	0.68099
GO:0045332	phospholipid translocation	6	1	1.05	2686	0.68331	0.68099
GO:0045463	R8 cell development	6	1	1.05	2687	0.68331	0.68099
GO:0045835	negative regulation of meiotic nuclear division	6	1	1.05	2688	0.68331	0.68099
GO:0046688	response to copper ion	6	1	1.05	2689	0.68331	0.68099
GO:0048636	positive regulation of muscle organ development	6	1	1.05	2690	0.68331	0.68099
GO:0048841	regulation of axon extension involved in axon guidance	6	1	1.05	2691	0.68331	0.68099
GO:0050764	regulation of phagocytosis	6	1	1.05	2692	0.68331	0.68099
GO:0050848	regulation of calcium-mediated signaling	6	1	1.05	2693	0.68331	0.68099
GO:0060253	negative regulation of glial cell proliferation	6	1	1.05	2694	0.68331	0.68099
GO:0060628	regulation of ER to Golgi vesicle-mediated transport	6	1	1.05	2695	0.68331	0.68099
GO:0061512	protein localization to cilium	6	1	1.05	2696	0.68331	0.68099
GO:0070534	protein K63-linked ubiquitination	6	1	1.05	2697	0.68331	0.68099
GO:0070922	small RNA loading onto RISC	6	1	1.05	2698	0.68331	0.68099
GO:0071222	cellular response to lipopolysaccharide	6	1	1.05	2699	0.68331	0.68099
GO:0071260	cellular response to mechanical stimulus	6	1	1.05	2700	0.68331	0.68099
GO:0086010	membrane depolarization during action potential	6	1	1.05	2701	0.68331	0.68099
GO:0090141	positive regulation of mitochondrial fission	6	1	1.05	2702	0.68331	0.68099
GO:0090151	establishment of protein localization to mitochondrial membrane	6	1	1.05	2703	0.68331	0.68099
GO:0090278	negative regulation of peptide hormone secretion	6	1	1.05	2704	0.68331	0.68099
GO:0090481	pyrimidine nucleotide-sugar transmembrane transport	6	1	1.05	2705	0.68331	0.68099
GO:0097206	nephrocyte filtration	6	1	1.05	2706	0.68331	0.68099
GO:0098725	symmetric cell division	6	1	1.05	2707	0.68331	0.68099
GO:1900078	positive regulation of cellular response to insulin stimulus	6	1	1.05	2708	0.68331	0.68099
GO:1900117	regulation of execution phase of apoptosis	6	1	1.05	2709	0.68331	0.68099
GO:1902475	L-alpha-amino acid transmembrane transport	6	1	1.05	2710	0.68331	0.68099
GO:1990182	exosomal secretion	6	1	1.05	2711	0.68331	0.68099
GO:2000105	positive regulation of DNA-dependent DNA replication	6	1	1.05	2712	0.68331	0.68099
GO:2000252	negative regulation of feeding behavior	6	1	1.05	2713	0.68331	0.68099
GO:2000637	positive regulation of gene silencing by miRNA	6	1	1.05	2714	0.68331	0.68099
GO:2001023	regulation of response to drug	6	1	1.05	2715	0.68331	0.68099
GO:0001508	action potential	12	2	2.09	2573	0.6455	0.681
GO:0015914	phospholipid transport	12	2	2.09	2574	0.6455	0.681
GO:0060964	regulation of gene silencing by miRNA	12	2	2.09	2575	0.6455	0.681
GO:0006206	pyrimidine nucleobase metabolic process	13	2	2.27	2753	0.68987	0.68105
GO:0060261	positive regulation of transcription initiation from RNA polymerase II promoter	14	2	2.44	2836	0.72955	0.6811
GO:0007043	cell-cell junction assembly	63	10	10.98	2636	0.67951	0.68124
GO:0050790	regulation of catalytic activity	311	53	54.22	2363	0.59786	0.68125
GO:0006259	DNA metabolic process	289	49	50.38	2372	0.61137	0.68131
GO:0030716	oocyte fate determination	33	4	5.75	3265	0.85166	0.68148
GO:0043484	regulation of RNA splicing	91	13	15.86	3221	0.82435	0.68179
GO:0042981	regulation of apoptotic process	203	47	35.39	361	0.02136	0.68186
GO:0031047	gene silencing by RNA	69	8	12.03	3473	0.93205	0.68214
GO:0045926	negative regulation of growth	97	26	16.91	276	0.01342	0.68251
GO:0016318	ommatidial rotation	26	4	4.53	2741	0.6882	0.68346
GO:0032535	regulation of cellular component size	159	32	27.72	1207	0.21004	0.68452
GO:0051726	regulation of cell cycle	271	55	47.25	874	0.11978	0.68464
GO:0007469	antennal development	23	7	4.01	734	0.09087	0.68515
GO:0051495	positive regulation of cytoskeleton organization	55	11	9.59	1747	0.35985	0.6858
GO:0006493	protein O-linked glycosylation	41	7	7.15	2304	0.58874	0.68646
GO:0051302	regulation of cell division	24	4	4.18	2513	0.62324	0.68649
GO:0007220	Notch receptor processing	13	2	2.27	2754	0.68987	0.68653
GO:0007428	primary branching, open tracheal system	13	2	2.27	2755	0.68987	0.68653
GO:0030150	protein import into mitochondrial matrix	13	2	2.27	2756	0.68987	0.68653
GO:0030322	stabilization of membrane potential	13	2	2.27	2757	0.68987	0.68653
GO:0030720	oocyte localization involved in germarium-derived egg chamber formation	13	2	2.27	2758	0.68987	0.68653
GO:0035065	regulation of histone acetylation	13	2	2.27	2759	0.68987	0.68653
GO:0035289	posterior head segmentation	13	2	2.27	2760	0.68987	0.68653
GO:0040040	thermosensory behavior	13	2	2.27	2761	0.68987	0.68653
GO:0042417	dopamine metabolic process	13	2	2.27	2762	0.68987	0.68653
GO:0042632	cholesterol homeostasis	13	2	2.27	2763	0.68987	0.68653
GO:0045773	positive regulation of axon extension	13	2	2.27	2764	0.68987	0.68653
GO:0048747	muscle fiber development	13	2	2.27	2765	0.68987	0.68653
GO:0072375	medium-term memory	13	2	2.27	2766	0.68987	0.68653
GO:0016266	O-glycan processing	19	3	3.31	2612	0.66853	0.68654
GO:0001894	tissue homeostasis	47	7	8.19	2861	0.73498	0.6869
GO:0031098	stress-activated protein kinase signaling cascade	83	13	14.47	2805	0.70931	0.68701
GO:0008088	axo-dendritic transport	38	5	6.62	3143	0.81691	0.68709
GO:0000027	ribosomal large subunit assembly	20	3	3.49	2793	0.70346	0.69941
GO:0007413	axonal fasciculation	20	3	3.49	2794	0.70346	0.69941
GO:0030148	sphingolipid biosynthetic process	34	5	5.93	2858	0.731	0.69963
GO:0019991	septate junction assembly	46	7	8.02	2808	0.71339	0.70732
GO:0050832	defense response to fungus	46	7	8.02	2809	0.71339	0.70732
GO:0060271	cilium assembly	60	12	10.46	1644	0.34949	0.71163
GO:0042127	regulation of cell proliferation	204	45	35.57	542	0.05047	0.71911
GO:0007613	memory	105	27	18.31	341	0.02048	0.72254
GO:0008361	regulation of cell size	92	23	16.04	502	0.04152	0.72327
GO:0060070	canonical Wnt signaling pathway	71	17	12.38	770	0.10073	0.72424
GO:0006091	generation of precursor metabolites and energy	160	64	27.89	1	8.8e-12	0.7257
GO:0035023	regulation of Rho protein signal transduction	30	5	5.23	2501	0.61917	0.72624
GO:0006446	regulation of translational initiation	19	3	3.31	2613	0.66853	0.72628
GO:0016476	regulation of embryonic cell shape	25	4	4.36	2598	0.65675	0.7263
GO:0000076	DNA replication checkpoint	14	2	2.44	2837	0.72955	0.72633
GO:0001941	postsynaptic membrane organization	14	2	2.44	2838	0.72955	0.72633
GO:0006182	cGMP biosynthetic process	14	2	2.44	2839	0.72955	0.72633
GO:0006607	NLS-bearing protein import into nucleus	14	2	2.44	2840	0.72955	0.72633
GO:0010499	proteasomal ubiquitin-independent protein catabolic process	14	2	2.44	2841	0.72955	0.72633
GO:0007446	imaginal disc growth	42	6	7.32	3008	0.76493	0.72668
GO:0045165	cell fate commitment	287	44	50.04	3261	0.8502	0.72856
GO:0002165	instar larval or pupal development	488	105	85.08	230	0.00958	0.7301
GO:0008406	gonad development	49	8	8.54	2549	0.63976	0.73153
GO:0051607	defense response to virus	39	6	6.8	2784	0.69693	0.73167
GO:0030182	neuron differentiation	678	131	118.2	756	0.09758	0.73211
GO:0006400	tRNA modification	51	7	8.89	3127	0.80983	0.7322
GO:0002065	columnar/cuboidal epithelial cell differentiation	281	62	48.99	383	0.025	0.73237
GO:0008283	cell proliferation	323	63	56.31	1069	0.17647	0.73249
GO:0071702	organic substance transport	655	123	114.19	1121	0.18534	0.73336
GO:0006650	glycerophospholipid metabolic process	84	23	14.64	285	0.01498	0.73386
GO:0042180	cellular ketone metabolic process	49	13	8.54	656	0.07264	0.73499
GO:0017085	response to insecticide	15	6	2.62	444	0.03343	0.73531
GO:0007631	feeding behavior	46	11	8.02	1048	0.16562	0.73541
GO:0032007	negative regulation of TOR signaling	15	5	2.62	782	0.10458	0.73559
GO:0007282	cystoblast division	17	5	2.96	1030	0.16071	0.73568
GO:0035290	trunk segmentation	13	4	2.27	1090	0.17814	0.73577
GO:0009612	response to mechanical stimulus	31	7	5.4	1499	0.28895	0.7358
GO:0035152	regulation of tube architecture, open tracheal system	83	16	14.47	1766	0.37167	0.73581
GO:0042749	regulation of circadian sleep/wake cycle	38	8	6.62	1627	0.33934	0.73586
GO:0030048	actin filament-based movement	27	6	4.71	1607	0.32697	0.73589
GO:0051924	regulation of calcium ion transport	17	4	2.96	1637	0.34309	0.73597
GO:0046328	regulation of JNK cascade	52	10	9.07	1909	0.42166	0.73598
GO:0003382	epithelial cell morphogenesis	25	5	4.36	1952	0.44728	0.73608
GO:0071390	cellular response to ecdysone	18	3	3.14	2532	0.63067	0.7363
GO:0001746	Bolwig's organ morphogenesis	7	1	1.22	2868	0.73856	0.73632
GO:0003407	neural retina development	7	1	1.22	2869	0.73856	0.73632
GO:0006207	'de novo' pyrimidine nucleobase biosynthetic process	7	1	1.22	2870	0.73856	0.73632
GO:0006272	leading strand elongation	7	1	1.22	2871	0.73856	0.73632
GO:0006312	mitotic recombination	7	1	1.22	2872	0.73856	0.73632
GO:0006348	chromatin silencing at telomere	7	1	1.22	2873	0.73856	0.73632
GO:0006353	DNA-templated transcription, termination	7	1	1.22	2874	0.73856	0.73632
GO:0006415	translational termination	7	1	1.22	2875	0.73856	0.73632
GO:0006570	tyrosine metabolic process	7	1	1.22	2876	0.73856	0.73632
GO:0006625	protein targeting to peroxisome	7	1	1.22	2877	0.73856	0.73632
GO:0006801	superoxide metabolic process	7	1	1.22	2878	0.73856	0.73632
GO:0006825	copper ion transport	7	1	1.22	2879	0.73856	0.73632
GO:0007249	I-kappaB kinase/NF-kappaB signaling	7	1	1.22	2880	0.73856	0.73632
GO:0007377	germ-band extension	7	1	1.22	2881	0.73856	0.73632
GO:0007438	oenocyte development	7	1	1.22	2882	0.73856	0.73632
GO:0007516	hemocyte development	7	1	1.22	2883	0.73856	0.73632
GO:0009068	aspartate family amino acid catabolic process	7	1	1.22	2884	0.73856	0.73632
GO:0009395	phospholipid catabolic process	7	1	1.22	2885	0.73856	0.73632
GO:0009396	folic acid-containing compound biosynthetic process	7	1	1.22	2886	0.73856	0.73632
GO:0016057	regulation of membrane potential in photoreceptor cell	7	1	1.22	2887	0.73856	0.73632
GO:0016114	terpenoid biosynthetic process	7	1	1.22	2888	0.73856	0.73632
GO:0016486	peptide hormone processing	7	1	1.22	2889	0.73856	0.73632
GO:0022600	digestive system process	7	1	1.22	2890	0.73856	0.73632
GO:0032367	intracellular cholesterol transport	7	1	1.22	2891	0.73856	0.73632
GO:0032368	regulation of lipid transport	7	1	1.22	2892	0.73856	0.73632
GO:0032414	positive regulation of ion transmembrane transporter activity	7	1	1.22	2893	0.73856	0.73632
GO:0032875	regulation of DNA endoreduplication	7	1	1.22	2894	0.73856	0.73632
GO:0033353	S-adenosylmethionine cycle	7	1	1.22	2895	0.73856	0.73632
GO:0034475	U4 snRNA 3'-end processing	7	1	1.22	2896	0.73856	0.73632
GO:0035308	negative regulation of protein dephosphorylation	7	1	1.22	2897	0.73856	0.73632
GO:0042595	behavioral response to starvation	7	1	1.22	2898	0.73856	0.73632
GO:0045500	sevenless signaling pathway	7	1	1.22	2899	0.73856	0.73632
GO:0045751	negative regulation of Toll signaling pathway	7	1	1.22	2900	0.73856	0.73632
GO:0046513	ceramide biosynthetic process	7	1	1.22	2901	0.73856	0.73632
GO:0046902	regulation of mitochondrial membrane permeability	7	1	1.22	2902	0.73856	0.73632
GO:0048789	cytoskeletal matrix organization at active zone	7	1	1.22	2903	0.73856	0.73632
GO:0050974	detection of mechanical stimulus involved in sensory perception	7	1	1.22	2904	0.73856	0.73632
GO:0051443	positive regulation of ubiquitin-protein transferase activity	7	1	1.22	2905	0.73856	0.73632
GO:0060914	heart formation	7	1	1.22	2906	0.73856	0.73632
GO:0070129	regulation of mitochondrial translation	7	1	1.22	2907	0.73856	0.73632
GO:0070475	rRNA base methylation	7	1	1.22	2908	0.73856	0.73632
GO:0070613	regulation of protein processing	7	1	1.22	2909	0.73856	0.73632
GO:0072529	pyrimidine-containing compound catabolic process	7	1	1.22	2910	0.73856	0.73632
GO:0090309	positive regulation of methylation-dependent chromatin silencing	7	1	1.22	2911	0.73856	0.73632
GO:1901409	positive regulation of phosphorylation of RNA polymerase II C-terminal domain	7	1	1.22	2912	0.73856	0.73632
GO:0031398	positive regulation of protein ubiquitination	14	2	2.44	2842	0.72955	0.73638
GO:0030317	flagellated sperm motility	15	2	2.62	2989	0.76484	0.73643
GO:0050919	negative chemotaxis	18	2	3.14	3245	0.84764	0.73658
GO:0001738	morphogenesis of a polarized epithelium	111	18	19.35	2627	0.67186	0.73662
GO:0010332	response to gamma radiation	19	2	3.31	3314	0.86872	0.73663
GO:0030154	cell differentiation	1468	299	255.93	101	0.00069	0.73821
GO:0018105	peptidyl-serine phosphorylation	41	6	7.15	2953	0.74362	0.73823
GO:0007455	eye-antennal disc morphogenesis	38	9	6.62	1200	0.20586	0.73855
GO:0044249	cellular biosynthetic process	2088	353	364.02	3026	0.78009	0.73967
GO:0008587	imaginal disc-derived wing margin morphogenesis	46	8	8.02	2266	0.56393	0.73988
GO:0045727	positive regulation of translation	33	5	5.75	2800	0.70549	0.7403
GO:0007605	sensory perception of sound	54	8	9.41	2964	0.74781	0.74165
GO:0042052	rhabdomere development	42	8	7.32	1983	0.45361	0.74893
GO:0017144	drug metabolic process	301	84	52.48	26	2.9e-06	0.75182
GO:0007186	G-protein coupled receptor signaling pathway	176	29	30.68	2607	0.66332	0.75321
GO:0040011	locomotion	569	117	99.2	388	0.02527	0.75383
GO:0007417	central nervous system development	223	38	38.88	2313	0.59064	0.75933
GO:0015711	organic anion transport	133	27	23.19	1273	0.21954	0.75999
GO:0007269	neurotransmitter secretion	97	18	16.91	1914	0.42607	0.76007
GO:0016042	lipid catabolic process	98	17	17.09	2243	0.55118	0.76063
GO:0007379	segment specification	30	7	5.23	1395	0.25963	0.76084
GO:0016199	axon midline choice point recognition	22	3	3.84	2982	0.76475	0.76102
GO:0007062	sister chromatid cohesion	24	5	4.18	1844	0.41012	0.76121
GO:0046928	regulation of neurotransmitter secretion	21	4	3.66	2124	0.51118	0.7614
GO:0061057	peptidoglycan recognition protein signaling pathway	22	4	3.84	2237	0.55031	0.76147
GO:0048167	regulation of synaptic plasticity	24	4	4.18	2514	0.62324	0.7616
GO:0001736	establishment of planar polarity	99	17	17.26	2276	0.56941	0.7616
GO:0035151	regulation of tube size, open tracheal system	49	8	8.54	2550	0.63976	0.76173
GO:0007204	positive regulation of cytosolic calcium ion concentration	15	2	2.62	2990	0.76484	0.76177
GO:0007303	cytoplasmic transport, nurse cell to oocyte	15	2	2.62	2991	0.76484	0.76177
GO:0007464	R3/R4 cell fate commitment	15	2	2.62	2992	0.76484	0.76177
GO:0016063	rhodopsin biosynthetic process	15	2	2.62	2993	0.76484	0.76177
GO:0019236	response to pheromone	15	2	2.62	2994	0.76484	0.76177
GO:0051091	positive regulation of DNA binding transcription factor activity	15	2	2.62	2995	0.76484	0.76177
GO:0060857	establishment of glial blood-brain barrier	15	2	2.62	2996	0.76484	0.76177
GO:0008286	insulin receptor signaling pathway	41	5	7.15	3309	0.86567	0.76235
GO:0006909	phagocytosis	54	9	9.41	2377	0.61532	0.7654
GO:0007526	larval somatic muscle development	29	4	5.06	3018	0.77	0.76576
GO:0016321	female meiosis chromosome segregation	29	4	5.06	3019	0.77	0.76576
GO:0006342	chromatin silencing	103	17	17.96	2544	0.63928	0.77225
GO:0009168	purine ribonucleoside monophosphate biosynthetic process	48	18	8.37	102	0.00073	0.77937
GO:0000910	cytokinesis	103	26	17.96	413	0.02829	0.77977
GO:0090068	positive regulation of cell cycle process	34	10	5.93	581	0.05932	0.78087
GO:0043406	positive regulation of MAP kinase activity	19	5	3.31	1285	0.22622	0.78151
GO:0035148	tube formation	33	7	5.75	1648	0.34949	0.78162
GO:0003383	apical constriction	18	4	3.14	1799	0.38612	0.78173
GO:0017158	regulation of calcium ion-dependent exocytosis	14	3	2.44	1975	0.45175	0.78181
GO:0043112	receptor metabolic process	14	3	2.44	1976	0.45175	0.78181
GO:0003014	renal system process	22	4	3.84	2238	0.55031	0.78192
GO:0050688	regulation of defense response to virus	18	3	3.14	2533	0.63067	0.782
GO:0009084	glutamine family amino acid biosynthetic process	13	2	2.27	2767	0.68987	0.78203
GO:0042675	compound eye cone cell differentiation	19	3	3.31	2614	0.66853	0.78204
GO:0000963	mitochondrial RNA processing	8	1	1.39	3033	0.78418	0.78207
GO:0001682	tRNA 5'-leader removal	8	1	1.39	3034	0.78418	0.78207
GO:0006044	N-acetylglucosamine metabolic process	8	1	1.39	3035	0.78418	0.78207
GO:0006525	arginine metabolic process	8	1	1.39	3036	0.78418	0.78207
GO:0006688	glycosphingolipid biosynthetic process	8	1	1.39	3037	0.78418	0.78207
GO:0006697	ecdysone biosynthetic process	8	1	1.39	3038	0.78418	0.78207
GO:0006896	Golgi to vacuole transport	8	1	1.39	3039	0.78418	0.78207
GO:0007158	neuron cell-cell adhesion	8	1	1.39	3040	0.78418	0.78207
GO:0007288	sperm axoneme assembly	8	1	1.39	3041	0.78418	0.78207
GO:0007319	negative regulation of oskar mRNA translation	8	1	1.39	3042	0.78418	0.78207
GO:0007486	imaginal disc-derived female genitalia development	8	1	1.39	3043	0.78418	0.78207
GO:0007539	primary sex determination, soma	8	1	1.39	3044	0.78418	0.78207
GO:0008637	apoptotic mitochondrial changes	8	1	1.39	3045	0.78418	0.78207
GO:0010923	negative regulation of phosphatase activity	8	1	1.39	3046	0.78418	0.78207
GO:0030206	chondroitin sulfate biosynthetic process	8	1	1.39	3047	0.78418	0.78207
GO:0032387	negative regulation of intracellular transport	8	1	1.39	3048	0.78418	0.78207
GO:0033119	negative regulation of RNA splicing	8	1	1.39	3049	0.78418	0.78207
GO:0034427	nuclear-transcribed mRNA catabolic process, exonucleolytic, 3'-5'	8	1	1.39	3050	0.78418	0.78207
GO:0034508	centromere complex assembly	8	1	1.39	3051	0.78418	0.78207
GO:0036297	interstrand cross-link repair	8	1	1.39	3052	0.78418	0.78207
GO:0043101	purine-containing compound salvage	8	1	1.39	3053	0.78418	0.78207
GO:0043652	engulfment of apoptotic cell	8	1	1.39	3054	0.78418	0.78207
GO:0045003	double-strand break repair via synthesis-dependent strand annealing	8	1	1.39	3055	0.78418	0.78207
GO:0045705	negative regulation of salivary gland boundary specification	8	1	1.39	3056	0.78418	0.78207
GO:0045833	negative regulation of lipid metabolic process	8	1	1.39	3057	0.78418	0.78207
GO:0045899	positive regulation of RNA polymerase II transcriptional preinitiation complex assembly	8	1	1.39	3058	0.78418	0.78207
GO:0046533	negative regulation of photoreceptor cell differentiation	8	1	1.39	3059	0.78418	0.78207
GO:0046664	dorsal closure, amnioserosa morphology change	8	1	1.39	3060	0.78418	0.78207
GO:0046717	acid secretion	8	1	1.39	3061	0.78418	0.78207
GO:0046885	regulation of hormone biosynthetic process	8	1	1.39	3062	0.78418	0.78207
GO:0048009	insulin-like growth factor receptor signaling pathway	8	1	1.39	3063	0.78418	0.78207
GO:0048096	chromatin-mediated maintenance of transcription	8	1	1.39	3064	0.78418	0.78207
GO:0060074	synapse maturation	8	1	1.39	3065	0.78418	0.78207
GO:0060078	regulation of postsynaptic membrane potential	8	1	1.39	3066	0.78418	0.78207
GO:0070072	vacuolar proton-transporting V-type ATPase complex assembly	8	1	1.39	3067	0.78418	0.78207
GO:0090114	COPII-coated vesicle budding	8	1	1.39	3068	0.78418	0.78207
GO:0097105	presynaptic membrane assembly	8	1	1.39	3069	0.78418	0.78207
GO:0098586	cellular response to virus	8	1	1.39	3070	0.78418	0.78207
GO:1902669	positive regulation of axon guidance	8	1	1.39	3071	0.78418	0.78207
GO:1904064	positive regulation of cation transmembrane transport	8	1	1.39	3072	0.78418	0.78207
GO:0034968	histone lysine methylation	43	7	7.5	2557	0.64179	0.78209
GO:0042461	photoreceptor cell development	114	19	19.87	2518	0.62478	0.78217
GO:0002805	regulation of antimicrobial peptide biosynthetic process	32	3	5.58	3477	0.93538	0.78264
GO:0051346	negative regulation of hydrolase activity	41	4	7.15	3485	0.94357	0.78279
GO:0016197	endosomal transport	92	20	16.04	1052	0.16851	0.78549
GO:0006497	protein lipidation	55	12	9.59	1329	0.24131	0.78621
GO:0007507	heart development	97	19	16.91	1601	0.32603	0.78742
GO:0006270	DNA replication initiation	23	3	4.01	3098	0.7913	0.78776
GO:0044719	regulation of imaginal disc-derived wing size	23	3	4.01	3099	0.7913	0.78776
GO:0043065	positive regulation of apoptotic process	55	8	9.59	3013	0.76643	0.78801
GO:0006869	lipid transport	62	8	10.81	3319	0.86949	0.78855
GO:0072499	photoreceptor cell axon guidance	30	4	5.23	3101	0.7932	0.78916
GO:0008298	intracellular mRNA localization	79	16	13.77	1512	0.29537	0.79202
GO:0009617	response to bacterium	184	34	32.08	1786	0.38281	0.79209
GO:0010507	negative regulation of autophagy	23	5	4.01	1776	0.37262	0.7925
GO:0071902	positive regulation of protein serine/threonine kinase activity	35	7	6.1	1851	0.41119	0.79253
GO:1901361	organic cyclic compound catabolic process	174	31	30.34	2017	0.47834	0.79256
GO:0015893	drug transport	25	5	4.36	1953	0.44728	0.79263
GO:0007189	adenylate cyclase-activating G-protein coupled receptor signaling pathway	23	4	4.01	2293	0.58772	0.79287
GO:0031060	regulation of histone methylation	27	4	4.71	2813	0.71754	0.79312
GO:0007370	ventral furrow formation	16	2	2.79	3106	0.79605	0.79315
GO:0014019	neuroblast development	16	2	2.79	3107	0.79605	0.79315
GO:0032012	regulation of ARF protein signal transduction	16	2	2.79	3108	0.79605	0.79315
GO:0045494	photoreceptor cell maintenance	16	2	2.79	3109	0.79605	0.79315
GO:0051642	centrosome localization	16	2	2.79	3110	0.79605	0.79315
GO:0006626	protein targeting to mitochondrion	29	4	5.06	3020	0.77	0.79325
GO:0006351	transcription, DNA-templated	1031	172	179.74	3006	0.76486	0.79566
GO:0006749	glutathione metabolic process	44	6	7.67	3123	0.80356	0.79878
GO:0006906	vesicle fusion	67	11	11.68	2541	0.63726	0.81029
GO:0070868	heterochromatin organization involved in chromatin silencing	24	3	4.18	3132	0.81531	0.81197
GO:2001020	regulation of response to DNA damage stimulus	24	3	4.18	3133	0.81531	0.81197
GO:0048646	anatomical structure formation involved in morphogenesis	449	104	78.28	113	0.00088	0.81278
GO:0009267	cellular response to starvation	63	15	10.98	891	0.12245	0.81297
GO:0022904	respiratory electron transport chain	68	26	11.86	43	3.6e-05	0.81617
GO:0048585	negative regulation of response to stimulus	326	70	56.83	435	0.03187	0.81624
GO:0009152	purine ribonucleotide biosynthetic process	79	23	13.77	199	0.00692	0.81741
GO:0001934	positive regulation of protein phosphorylation	140	31	24.41	730	0.08822	0.81804
GO:0008306	associative learning	51	15	8.89	375	0.02398	0.81821
GO:0071705	nitrogen compound transport	521	96	90.83	1492	0.28589	0.81824
GO:0051028	mRNA transport	43	13	7.5	408	0.02754	0.81836
GO:0009755	hormone-mediated signaling pathway	36	8	6.28	1490	0.28365	0.81931
GO:1990778	protein localization to cell periphery	49	10	8.54	1641	0.34589	0.81937
GO:1901215	negative regulation of neuron death	26	6	4.53	1508	0.29386	0.81937
GO:0030011	maintenance of cell polarity	19	4	3.31	1927	0.42876	0.81957
GO:0042659	regulation of cell fate specification	27	5	4.71	2137	0.51946	0.81966
GO:0051668	localization within membrane	23	4	4.01	2294	0.58772	0.81974
GO:0018205	peptidyl-lysine modification	133	23	23.19	2244	0.55348	0.81976
GO:0006576	cellular biogenic amine metabolic process	18	3	3.14	2534	0.63067	0.81977
GO:0050805	negative regulation of synaptic transmission	18	3	3.14	2535	0.63067	0.81977
GO:0060438	trachea development	18	3	3.14	2536	0.63067	0.81977
GO:0042752	regulation of circadian rhythm	75	15	13.08	1598	0.32216	0.81981
GO:0006366	transcription by RNA polymerase II	624	110	108.79	2000	0.46484	0.81982
GO:0000394	RNA splicing, via endonucleolytic cleavage and ligation	9	1	1.57	3146	0.82185	0.81988
GO:0000479	endonucleolytic cleavage of tricistronic rRNA transcript (SSU-rRNA, 5.8S rRNA, LSU-rRNA)	9	1	1.57	3147	0.82185	0.81988
GO:0006071	glycerol metabolic process	9	1	1.57	3148	0.82185	0.81988
GO:0006376	mRNA splice site selection	9	1	1.57	3149	0.82185	0.81988
GO:0006937	regulation of muscle contraction	9	1	1.57	3150	0.82185	0.81988
GO:0007386	compartment pattern specification	9	1	1.57	3151	0.82185	0.81988
GO:0007418	ventral midline development	9	1	1.57	3152	0.82185	0.81988
GO:0008348	negative regulation of antimicrobial humoral response	9	1	1.57	3153	0.82185	0.81988
GO:0009253	peptidoglycan catabolic process	9	1	1.57	3154	0.82185	0.81988
GO:0010312	detoxification of zinc ion	9	1	1.57	3155	0.82185	0.81988
GO:0016332	establishment or maintenance of polarity of embryonic epithelium	9	1	1.57	3156	0.82185	0.81988
GO:0016574	histone ubiquitination	9	1	1.57	3157	0.82185	0.81988
GO:0019221	cytokine-mediated signaling pathway	9	1	1.57	3158	0.82185	0.81988
GO:0031573	intra-S DNA damage checkpoint	9	1	1.57	3159	0.82185	0.81988
GO:0031936	negative regulation of chromatin silencing	9	1	1.57	3160	0.82185	0.81988
GO:0033363	secretory granule organization	9	1	1.57	3161	0.82185	0.81988
GO:0035288	anterior head segmentation	9	1	1.57	3162	0.82185	0.81988
GO:0043697	cell dedifferentiation	9	1	1.57	3163	0.82185	0.81988
GO:0045571	negative regulation of imaginal disc growth	9	1	1.57	3164	0.82185	0.81988
GO:0046653	tetrahydrofolate metabolic process	9	1	1.57	3165	0.82185	0.81988
GO:0046845	branched duct epithelial cell fate determination, open tracheal system	9	1	1.57	3166	0.82185	0.81988
GO:0048791	calcium ion-regulated exocytosis of neurotransmitter	9	1	1.57	3167	0.82185	0.81988
GO:0050908	detection of light stimulus involved in visual perception	9	1	1.57	3168	0.82185	0.81988
GO:0050965	detection of temperature stimulus involved in sensory perception of pain	9	1	1.57	3169	0.82185	0.81988
GO:0061327	anterior Malpighian tubule development	9	1	1.57	3170	0.82185	0.81988
GO:0070734	histone H3-K27 methylation	9	1	1.57	3171	0.82185	0.81988
GO:0071481	cellular response to X-ray	9	1	1.57	3172	0.82185	0.81988
GO:2001235	positive regulation of apoptotic signaling pathway	9	1	1.57	3173	0.82185	0.81988
GO:0045456	ecdysteroid biosynthetic process	17	2	2.96	3209	0.82354	0.81998
GO:0046890	regulation of lipid biosynthetic process	19	2	3.31	3315	0.86872	0.82006
GO:0051051	negative regulation of transport	35	7	6.1	1852	0.41119	0.82018
GO:0072657	protein localization to membrane	101	14	17.61	3306	0.86239	0.82062
GO:0016458	gene silencing	173	26	30.16	3223	0.82701	0.82075
GO:0007400	neuroblast fate determination	17	2	2.96	3210	0.82354	0.82082
GO:0010591	regulation of lamellipodium assembly	17	2	2.96	3211	0.82354	0.82082
GO:0046854	phosphatidylinositol phosphorylation	17	2	2.96	3212	0.82354	0.82082
GO:0003007	heart morphogenesis	35	5	6.1	2974	0.75487	0.82087
GO:0043254	regulation of protein complex assembly	103	15	17.96	3140	0.81568	0.82148
GO:0042273	ribosomal large subunit biogenesis	59	6	10.29	3523	0.95857	0.82195
GO:0042254	ribosome biogenesis	202	19	35.22	3620	0.99962	0.82603
GO:0071805	potassium ion transmembrane transport	44	10	7.67	1288	0.22689	0.82852
GO:0000381	regulation of alternative mRNA splicing, via spliceosome	79	11	13.77	3230	0.83522	0.82944
GO:0008344	adult locomotory behavior	73	11	12.73	2968	0.74924	0.8305
GO:0006635	fatty acid beta-oxidation	31	6	5.4	1992	0.46126	0.83302
GO:0040018	positive regulation of multicellular organism growth	25	3	4.36	3234	0.83694	0.83379
GO:0090305	nucleic acid phosphodiester bond hydrolysis	74	8	12.9	3524	0.95893	0.83518
GO:0006468	protein phosphorylation	394	73	68.69	1544	0.29854	0.84002
GO:0007009	plasma membrane organization	24	4	4.18	2515	0.62324	0.84482
GO:0042136	neurotransmitter biosynthetic process	18	2	3.14	3246	0.84764	0.84512
GO:0045176	apical protein localization	18	2	3.14	3247	0.84764	0.84512
GO:0046529	imaginal disc fusion, thorax closure	18	2	3.14	3248	0.84764	0.84512
GO:0065002	intracellular protein transmembrane transport	31	4	5.4	3128	0.81449	0.84521
GO:0070507	regulation of microtubule cytoskeleton organization	43	6	7.5	3092	0.7849	0.84523
GO:0046148	pigment biosynthetic process	67	8	11.68	3442	0.91758	0.84592
GO:0006030	chitin metabolic process	69	12	12.03	2247	0.55365	0.84606
GO:0007391	dorsal closure	100	17	17.43	2289	0.58737	0.84685
GO:1901700	response to oxygen-containing compound	253	59	44.11	222	0.00934	0.84739
GO:1901136	carbohydrate derivative catabolic process	66	11	11.51	2381	0.61626	0.8477
GO:0007606	sensory perception of chemical stimulus	96	16	16.74	2506	0.62114	0.84779
GO:0042493	response to drug	158	40	27.55	209	0.00748	0.84803
GO:0000462	maturation of SSU-rRNA from tricistronic rRNA transcript (SSU-rRNA, 5.8S rRNA, LSU-rRNA)	33	4	5.75	3266	0.85166	0.84825
GO:0042325	regulation of phosphorylation	243	51	42.36	714	0.08343	0.84888
GO:0006405	RNA export from nucleus	63	17	10.98	472	0.03814	0.84958
GO:0046907	intracellular transport	593	108	103.38	1592	0.31872	0.84969
GO:0008544	epidermis development	56	15	9.76	547	0.05249	0.84976
GO:0045088	regulation of innate immune response	85	20	14.82	747	0.0925	0.84976
GO:0007548	sex differentiation	93	18	16.21	1741	0.35237	0.85054
GO:0006368	transcription elongation from RNA polymerase II promoter	31	7	5.4	1500	0.28895	0.8506
GO:0030727	germarium-derived female germ-line cyst formation	20	5	3.49	1408	0.26151	0.85062
GO:0045995	regulation of embryonic development	76	14	13.25	1986	0.45687	0.85078
GO:0030866	cortical actin cytoskeleton organization	57	15	9.94	585	0.06021	0.85093
GO:0034314	Arp2/3 complex-mediated actin nucleation	15	2	2.62	2997	0.76484	0.85111
GO:0006094	gluconeogenesis	10	1	1.74	3268	0.85294	0.85114
GO:0006390	mitochondrial transcription	10	1	1.74	3269	0.85294	0.85114
GO:0008089	anterograde axonal transport	10	1	1.74	3270	0.85294	0.85114
GO:0008090	retrograde axonal transport	10	1	1.74	3271	0.85294	0.85114
GO:0009070	serine family amino acid biosynthetic process	10	1	1.74	3272	0.85294	0.85114
GO:0019896	axonal transport of mitochondrion	10	1	1.74	3273	0.85294	0.85114
GO:0032508	DNA duplex unwinding	10	1	1.74	3274	0.85294	0.85114
GO:0045186	zonula adherens assembly	10	1	1.74	3275	0.85294	0.85114
GO:0045752	positive regulation of Toll signaling pathway	10	1	1.74	3276	0.85294	0.85114
GO:0046889	positive regulation of lipid biosynthetic process	10	1	1.74	3277	0.85294	0.85114
GO:0050775	positive regulation of dendrite morphogenesis	10	1	1.74	3278	0.85294	0.85114
GO:0060026	convergent extension	10	1	1.74	3279	0.85294	0.85114
GO:0060232	delamination	10	1	1.74	3280	0.85294	0.85114
GO:0090316	positive regulation of intracellular protein transport	10	1	1.74	3281	0.85294	0.85114
GO:0008299	isoprenoid biosynthetic process	17	2	2.96	3213	0.82354	0.85119
GO:0090502	RNA phosphodiester bond hydrolysis, endonucleolytic	20	2	3.49	3363	0.88708	0.8513
GO:0010004	gastrulation involving germ band extension	31	3	5.4	3448	0.92587	0.85151
GO:0006310	DNA recombination	78	7	13.6	3589	0.98885	0.85246
GO:0010468	regulation of gene expression	1302	213	226.99	3328	0.87689	0.85834
GO:0048749	compound eye development	335	67	58.4	865	0.11783	0.85844
GO:0033554	cellular response to stress	525	100	91.53	1055	0.17102	0.86316
GO:0008063	Toll signaling pathway	42	6	7.32	3009	0.76493	0.86639
GO:0005975	carbohydrate metabolic process	230	58	40.1	124	0.00162	0.86797
GO:0007294	germarium-derived oocyte fate determination	27	3	4.71	3321	0.87369	0.87096
GO:0007494	midgut development	27	3	4.71	3322	0.87369	0.87096
GO:0071456	cellular response to hypoxia	27	3	4.71	3323	0.87369	0.87096
GO:0000398	mRNA splicing, via spliceosome	236	32	41.14	3519	0.95702	0.87405
GO:0022008	neurogenesis	799	149	139.3	1110	0.18237	0.87436
GO:0007474	imaginal disc-derived wing vein specification	49	6	8.54	3329	0.87851	0.87487
GO:0009100	glycoprotein metabolic process	130	30	22.66	577	0.05921	0.87521
GO:0006260	DNA replication	99	20	17.26	1418	0.26922	0.87619
GO:0071482	cellular response to light stimulus	43	9	7.5	1613	0.3299	0.87646
GO:0008016	regulation of heart contraction	22	5	3.84	1621	0.33511	0.87654
GO:0046620	regulation of organ growth	52	9	9.07	2274	0.56693	0.87679
GO:0050773	regulation of dendrite development	43	7	7.5	2558	0.64179	0.87688
GO:0036011	imaginal disc-derived leg segmentation	26	4	4.53	2742	0.6882	0.87689
GO:0001710	mesodermal cell fate commitment	11	1	1.92	3332	0.87861	0.87697
GO:0002121	inter-male aggressive behavior	11	1	1.92	3333	0.87861	0.87697
GO:0006613	cotranslational protein targeting to membrane	11	1	1.92	3334	0.87861	0.87697
GO:0006964	positive regulation of biosynthetic process of antibacterial peptides active against Gram-negative b...	11	1	1.92	3335	0.87861	0.87697
GO:0006970	response to osmotic stress	11	1	1.92	3336	0.87861	0.87697
GO:0007056	spindle assembly involved in female meiosis	11	1	1.92	3337	0.87861	0.87697
GO:0007488	histoblast morphogenesis	11	1	1.92	3338	0.87861	0.87697
GO:0010977	negative regulation of neuron projection development	11	1	1.92	3339	0.87861	0.87697
GO:0015695	organic cation transport	11	1	1.92	3340	0.87861	0.87697
GO:0016201	synaptic target inhibition	11	1	1.92	3341	0.87861	0.87697
GO:0019226	transmission of nerve impulse	11	1	1.92	3342	0.87861	0.87697
GO:0022409	positive regulation of cell-cell adhesion	11	1	1.92	3343	0.87861	0.87697
GO:0031057	negative regulation of histone modification	11	1	1.92	3344	0.87861	0.87697
GO:0031111	negative regulation of microtubule polymerization or depolymerization	11	1	1.92	3345	0.87861	0.87697
GO:0031572	G2 DNA damage checkpoint	11	1	1.92	3346	0.87861	0.87697
GO:0043162	ubiquitin-dependent protein catabolic process via the multivesicular body sorting pathway	11	1	1.92	3347	0.87861	0.87697
GO:0045572	positive regulation of imaginal disc growth	11	1	1.92	3348	0.87861	0.87697
GO:0048082	regulation of adult chitin-containing cuticle pigmentation	11	1	1.92	3349	0.87861	0.87697
GO:0048100	wing disc anterior/posterior pattern formation	11	1	1.92	3350	0.87861	0.87697
GO:2000274	regulation of epithelial cell migration, open tracheal system	11	1	1.92	3351	0.87861	0.87697
GO:2000377	regulation of reactive oxygen species metabolic process	11	1	1.92	3352	0.87861	0.87697
GO:0044743	protein transmembrane import into intracellular organelle	24	3	4.18	3134	0.81531	0.87702
GO:0016571	histone methylation	62	9	10.81	3024	0.77674	0.87715
GO:0006412	translation	407	47	70.96	3621	0.9997	0.8818
GO:0009636	response to toxic substance	131	31	22.84	501	0.04141	0.88226
GO:0045471	response to ethanol	69	18	12.03	526	0.04568	0.8829
GO:0034613	cellular protein localization	471	87	82.11	1494	0.2886	0.883
GO:0009950	dorsal/ventral axis specification	66	14	11.51	1362	0.25159	0.88385
GO:0006814	sodium ion transport	33	8	5.75	1196	0.20561	0.88393
GO:0007131	reciprocal meiotic recombination	28	3	4.88	3372	0.88915	0.88663
GO:0010389	regulation of G2/M transition of mitotic cell cycle	28	3	4.88	3373	0.88915	0.88663
GO:0045892	negative regulation of transcription, DNA-templated	307	50	53.52	2831	0.72821	0.88664
GO:0007480	imaginal disc-derived leg morphogenesis	76	10	13.25	3326	0.87535	0.887
GO:0006325	chromatin organization	334	48	58.23	3499	0.94582	0.8873
[truncated: 1,958 more rows]

## Sheet: male_up
GO.ID	Term	Annotated	Significant	Expected	Rank in Fisher.classic	Fisher.classic	Fisher.weight01
GO:0002181	cytoplasmic translation	105	44	14.32	4	7e-13	4.2e-15
GO:0010499	proteasomal ubiquitin-independent protein catabolic process	14	11	1.91	14	7.1e-08	7e-08
GO:0042761	very long-chain fatty acid biosynthetic process	16	11	2.18	19	6.5e-07	6.5e-07
GO:0035007	regulation of melanization defense response	7	7	0.95	21	8.6e-07	8.6e-07
GO:0019367	fatty acid elongation, saturated fatty acid	13	9	1.77	25	6.7e-06	6.7e-06
GO:0034625	fatty acid elongation, monounsaturated fatty acid	13	9	1.77	26	6.7e-06	6.7e-06
GO:0034626	fatty acid elongation, polyunsaturated fatty acid	13	9	1.77	27	6.7e-06	6.7e-06
GO:0055114	oxidation-reduction process	458	89	62.45	59	0.00023	1e-05
GO:0042273	ribosomal large subunit biogenesis	59	23	8.04	23	1.1e-06	1.6e-05
GO:0006508	proteolysis	617	116	84.13	46	0.00011	2.8e-05
GO:0030148	sphingolipid biosynthetic process	34	12	4.64	86	0.00118	0.00011
GO:0055085	transmembrane transport	474	82	64.63	190	0.01159	0.00011
GO:0045899	positive regulation of RNA polymerase II transcriptional preinitiation complex assembly	8	6	1.09	47	0.00014	0.00014
GO:0009083	branched-chain amino acid catabolic process	6	5	0.82	61	0.00025	0.00025
GO:0071616	acyl-CoA biosynthetic process	9	5	1.23	126	0.00365	0.00034
GO:0009062	fatty acid catabolic process	43	16	5.86	43	9.1e-05	0.00035
GO:1901606	alpha-amino acid catabolic process	37	16	5.05	29	9.8e-06	0.00052
GO:0010951	negative regulation of endopeptidase activity	24	10	3.27	75	0.00068	0.00067
GO:0000055	ribosomal large subunit export from nucleus	7	5	0.95	79	0.00077	0.00077
GO:0034637	cellular carbohydrate biosynthetic process	25	7	3.41	332	0.04473	0.00077
GO:0006551	leucine metabolic process	5	4	0.68	98	0.00153	0.00153
GO:0006563	L-serine metabolic process	5	4	0.68	99	0.00153	0.00153
GO:0009071	serine family amino acid catabolic process	5	4	0.68	100	0.00153	0.00153
GO:0010889	regulation of sequestering of triglyceride	5	4	0.68	101	0.00153	0.00153
GO:0030301	cholesterol transport	18	8	2.45	90	0.00143	0.00157
GO:0006964	positive regulation of biosynthetic process of antibacterial peptides active against Gram-negative b...	11	6	1.5	102	0.00159	0.00158
GO:1901607	alpha-amino acid biosynthetic process	37	13	5.05	80	0.00078	0.00248
GO:0043161	proteasome-mediated ubiquitin-dependent protein catabolic process	171	31	23.32	364	0.05677	0.00313
GO:0035006	melanization defense response	44	13	6	131	0.00455	0.00359
GO:0034497	protein localization to phagophore assembly site	6	4	0.82	129	0.0041	0.00409
GO:0007517	muscle organ development	92	14	12.54	1000	0.37262	0.00486
GO:0030866	cortical actin cytoskeleton organization	57	13	7.77	322	0.04012	0.00556
GO:0042737	drug catabolic process	55	12	7.5	394	0.06369	0.00558
GO:0032509	endosome transport via multivesicular body sorting pathway	20	7	2.73	196	0.01324	0.00712
GO:0006090	pyruvate metabolic process	33	7	4.5	610	0.15376	0.00718
GO:0006650	glycerophospholipid metabolic process	84	15	11.45	620	0.16413	0.0085
GO:0009068	aspartate family amino acid catabolic process	7	4	0.95	169	0.00854	0.00851
GO:0010884	positive regulation of lipid storage	7	4	0.95	170	0.00854	0.00851
GO:0033353	S-adenosylmethionine cycle	7	4	0.95	171	0.00854	0.00851
GO:0045751	negative regulation of Toll signaling pathway	7	4	0.95	172	0.00854	0.00851
GO:0048680	positive regulation of axon regeneration	7	4	0.95	173	0.00854	0.00851
GO:0072529	pyrimidine-containing compound catabolic process	7	4	0.95	174	0.00854	0.00851
GO:0051187	cofactor catabolic process	16	5	2.18	359	0.05598	0.00905
GO:0071310	cellular response to organic substance	267	38	36.41	1054	0.41368	0.00908
GO:0006629	lipid metabolic process	402	93	54.81	15	8.1e-08	0.00996
GO:0050830	defense response to Gram-positive bacterium	29	9	3.95	192	0.01226	0.01219
GO:0000027	ribosomal large subunit assembly	20	7	2.73	197	0.01324	0.01317
GO:0006469	negative regulation of protein kinase activity	27	10	3.68	107	0.00199	0.01503
GO:1901570	fatty acid derivative biosynthetic process	21	8	2.86	132	0.00457	0.01509
GO:0006544	glycine metabolic process	8	4	1.09	205	0.01525	0.0152
GO:0042135	neurotransmitter catabolic process	8	4	1.09	206	0.01525	0.0152
GO:0061028	establishment of endothelial barrier	8	4	1.09	207	0.01525	0.0152
GO:0009168	purine ribonucleoside monophosphate biosynthetic process	48	5	6.54	2136	0.8024	0.01542
GO:0035337	fatty-acyl-CoA metabolic process	16	7	2.18	120	0.0032	0.01844
GO:0042558	pteridine-containing compound metabolic process	18	6	2.45	268	0.0274	0.01848
GO:1990138	neuron projection extension	50	10	6.82	539	0.13502	0.01849
GO:0009895	negative regulation of catabolic process	35	7	4.77	657	0.19175	0.01853
GO:0072350	tricarboxylic acid metabolic process	35	7	4.77	658	0.19175	0.01853
GO:0031126	snoRNA 3'-end processing	7	3	0.95	367	0.05785	0.01853
GO:0051049	regulation of transport	241	28	32.86	2261	0.847	0.01877
GO:0032787	monocarboxylic acid metabolic process	133	45	18.13	10	1.9e-09	0.01908
GO:0006635	fatty acid beta-oxidation	31	9	4.23	222	0.01921	0.0191
GO:0043604	amide biosynthetic process	462	79	62.99	214	0.01714	0.0196
GO:0006575	cellular modified amino acid metabolic process	68	17	9.27	167	0.00838	0.02007
GO:0030041	actin filament polymerization	58	15	7.91	179	0.00932	0.02011
GO:0006739	NADP metabolic process	12	6	1.64	117	0.00281	0.02025
GO:1905039	carboxylic acid transmembrane transport	38	9	5.18	400	0.06521	0.02028
GO:0006568	tryptophan metabolic process	5	3	0.68	224	0.02041	0.02036
GO:0006723	cuticle hydrocarbon biosynthetic process	5	3	0.68	225	0.02041	0.02036
GO:0006777	Mo-molybdopterin cofactor biosynthetic process	5	3	0.68	226	0.02041	0.02036
GO:0009221	pyrimidine deoxyribonucleotide biosynthetic process	5	3	0.68	227	0.02041	0.02036
GO:0035193	larval central nervous system remodeling	5	3	0.68	228	0.02041	0.02036
GO:0046323	glucose import	17	6	2.32	236	0.02059	0.0205
GO:0000578	embryonic axis specification	124	16	16.91	1564	0.63451	0.02053
GO:0007173	epidermal growth factor receptor signaling pathway	65	11	8.86	838	0.26696	0.02063
GO:0032504	multicellular organism reproduction	952	111	129.81	2851	0.97567	0.02109
GO:0030433	ubiquitin-dependent ERAD pathway	22	7	3	244	0.02282	0.02271
GO:0009058	biosynthetic process	2146	275	292.61	2489	0.90935	0.02306
GO:0034614	cellular response to reactive oxygen species	13	5	1.77	247	0.02333	0.02324
GO:0006020	inositol metabolic process	9	4	1.23	253	0.02453	0.02445
GO:0043407	negative regulation of MAP kinase activity	9	4	1.23	254	0.02453	0.02445
GO:0007218	neuropeptide signaling pathway	44	11	6	281	0.03069	0.0305
GO:0035336	long-chain fatty-acyl-CoA metabolic process	14	5	1.91	285	0.03231	0.03219
GO:0044804	autophagy of nucleus	14	5	1.91	286	0.03231	0.03219
GO:0045433	male courtship behavior, veined wing generated song production	19	6	2.59	298	0.03556	0.03542
GO:0051489	regulation of filopodium assembly	31	9	4.23	223	0.01921	0.0362
GO:0006066	alcohol metabolic process	60	13	8.18	366	0.05777	0.03639
GO:0015701	bicarbonate transport	10	4	1.36	305	0.03655	0.03644
GO:0045752	positive regulation of Toll signaling pathway	10	4	1.36	306	0.03655	0.03644
GO:0035088	establishment or maintenance of apical/basal cell polarity	40	9	5.45	456	0.0856	0.0365
GO:0010888	negative regulation of lipid storage	6	3	0.82	310	0.03672	0.03663
GO:0019433	triglyceride catabolic process	6	3	0.82	311	0.03672	0.03663
GO:0043393	regulation of protein binding	6	3	0.82	312	0.03672	0.03663
GO:0050764	regulation of phagocytosis	6	3	0.82	313	0.03672	0.03663
GO:0048569	post-embryonic animal organ development	417	45	56.86	2796	0.96805	0.03797
GO:0006820	anion transport	177	34	24.13	242	0.02255	0.04197
GO:0006730	one-carbon metabolic process	15	5	2.05	329	0.04317	0.04302
GO:0045471	response to ethanol	69	17	9.41	182	0.00974	0.04419
GO:0046329	negative regulation of JNK cascade	25	7	3.41	333	0.04473	0.04454
GO:0000038	very long-chain fatty acid metabolic process	19	13	2.59	13	6.4e-08	0.0498
GO:0042278	purine nucleoside metabolic process	28	10	3.82	114	0.00272	0.05018
GO:0002804	positive regulation of antifungal peptide production	10	5	1.36	145	0.00649	0.0504
GO:0000154	rRNA modification	25	7	3.41	334	0.04473	0.05041
GO:0019731	antibacterial humoral response	29	12	3.95	57	0.00021	0.05041
GO:0042044	fluid transport	25	6	3.41	518	0.1149	0.0505
GO:0044550	secondary metabolite biosynthetic process	26	6	3.55	535	0.13309	0.05051
GO:0007368	determination of left/right symmetry	8	3	1.09	433	0.08341	0.05056
GO:0044273	sulfur compound catabolic process	8	3	1.09	434	0.08341	0.05056
GO:0045833	negative regulation of lipid metabolic process	8	3	1.09	435	0.08341	0.05056
GO:0032388	positive regulation of intracellular transport	18	3	2.45	1105	0.45304	0.05068
GO:0043252	sodium-independent organic anion transport	31	8	4.23	352	0.05144	0.0512
GO:0030837	negative regulation of actin filament polymerization	11	4	1.5	345	0.05139	0.05124
GO:0043162	ubiquitin-dependent protein catabolic process via the multivesicular body sorting pathway	11	4	1.5	346	0.05139	0.05124
GO:0061723	glycophagy	11	4	1.5	347	0.05139	0.05124
GO:0010033	response to organic substance	446	79	60.81	157	0.00733	0.05275
GO:0009617	response to bacterium	184	38	25.09	139	0.00509	0.05385
GO:0070328	triglyceride homeostasis	26	7	3.55	355	0.05428	0.05405
GO:0008340	determination of adult lifespan	139	26	18.95	357	0.05568	0.05517
GO:0007031	peroxisome organization	19	5	2.59	486	0.10589	0.05767
GO:0042219	cellular modified amino acid catabolic process	12	4	1.64	408	0.06902	0.05767
GO:0006098	pentose-phosphate shunt	7	3	0.95	368	0.05785	0.05772
GO:0006967	positive regulation of antifungal peptide biosynthetic process	7	3	0.95	369	0.05785	0.05772
GO:0007249	I-kappaB kinase/NF-kappaB signaling	7	3	0.95	370	0.05785	0.05772
GO:0009130	pyrimidine nucleoside monophosphate biosynthetic process	7	3	0.95	371	0.05785	0.05772
GO:0019934	cGMP-mediated signaling	7	3	0.95	372	0.05785	0.05772
GO:0042438	melanin biosynthetic process	7	3	0.95	373	0.05785	0.05772
GO:0046130	purine ribonucleoside catabolic process	7	3	0.95	374	0.05785	0.05772
GO:0046626	regulation of insulin receptor signaling pathway	26	5	3.55	847	0.27596	0.0578
GO:0007600	sensory perception	251	35	34.22	1150	0.47101	0.05789
GO:0042594	response to starvation	117	23	15.95	328	0.04266	0.06084
GO:0048149	behavioral response to ethanol	49	11	6.68	390	0.06211	0.06177
GO:0016042	lipid catabolic process	98	32	13.36	22	1e-06	0.06447
GO:0045887	positive regulation of synaptic growth at neuromuscular junction	27	7	3.68	396	0.065	0.06473
GO:0009620	response to fungus	58	15	7.91	180	0.00932	0.0679
GO:0000422	autophagy of mitochondrion	28	7	3.82	423	0.07691	0.06835
GO:0008069	dorsal/ventral axis specification, ovarian follicular epithelium	12	4	1.64	409	0.06902	0.06883
GO:0016226	iron-sulfur cluster assembly	12	4	1.64	410	0.06902	0.06883
GO:0019432	triglyceride biosynthetic process	12	4	1.64	411	0.06902	0.06883
GO:0071480	cellular response to gamma radiation	12	4	1.64	412	0.06902	0.06883
GO:0008152	metabolic process	4778	697	651.49	88	0.00127	0.07052
GO:0010501	RNA secondary structure unwinding	28	7	3.82	424	0.07691	0.0766
GO:0007310	oocyte dorsal/ventral axis specification	38	8	5.18	542	0.13705	0.08235
GO:0042274	ribosomal small subunit biogenesis	65	14	8.86	354	0.05241	0.08261
GO:0010591	regulation of lamellipodium assembly	17	6	2.32	237	0.02059	0.08289
GO:0050688	regulation of defense response to virus	18	6	2.45	269	0.0274	0.08292
GO:0009084	glutamine family amino acid biosynthetic process	13	5	1.77	248	0.02333	0.08298
GO:0003014	renal system process	22	6	3	404	0.06865	0.08302
GO:0001178	regulation of transcriptional start site selection at RNA polymerase II promoter	8	3	1.09	436	0.08341	0.08323
GO:0001676	long-chain fatty acid metabolic process	8	3	1.09	437	0.08341	0.08323
GO:0006525	arginine metabolic process	8	3	1.09	438	0.08341	0.08323
GO:0034975	protein folding in endoplasmic reticulum	8	3	1.09	439	0.08341	0.08323
GO:0043652	engulfment of apoptotic cell	8	3	1.09	440	0.08341	0.08323
GO:0046855	inositol phosphate dephosphorylation	8	3	1.09	441	0.08341	0.08323
GO:0048682	sprouting of injured axon	8	3	1.09	442	0.08341	0.08323
GO:1902358	sulfate transmembrane transport	8	3	1.09	443	0.08341	0.08323
GO:0048067	cuticle pigmentation	43	6	5.86	1318	0.5429	0.08356
GO:0034599	cellular response to oxidative stress	36	11	4.91	150	0.00667	0.08612
GO:0043248	proteasome assembly	18	5	2.45	458	0.08738	0.0871
GO:0010025	wax biosynthetic process	13	4	1.77	462	0.08933	0.08909
GO:0009166	nucleotide catabolic process	32	5	4.36	1093	0.44685	0.08948
GO:0007166	cell surface receptor signaling pathway	607	80	82.77	1664	0.65218	0.09123
GO:0006963	positive regulation of antibacterial peptide biosynthetic process	15	8	2.05	62	0.00031	0.09142
GO:0009072	aromatic amino acid family metabolic process	18	7	2.45	152	0.00695	0.09163
GO:1905954	positive regulation of lipid localization	11	6	1.5	103	0.00159	0.09164
GO:0009113	purine nucleobase biosynthetic process	9	4	1.23	255	0.02453	0.09191
GO:0046113	nucleobase catabolic process	10	4	1.36	307	0.03655	0.09193
GO:0098661	inorganic anion transmembrane transport	28	6	3.82	636	0.17317	0.092
GO:0000479	endonucleolytic cleavage of tricistronic rRNA transcript (SSU-rRNA, 5.8S rRNA, LSU-rRNA)	9	3	1.23	497	0.11286	0.09206
GO:0006873	cellular ion homeostasis	112	17	15.27	985	0.35593	0.09206
GO:0051100	negative regulation of binding	10	3	1.36	581	0.14556	0.09208
GO:0009067	aspartate family amino acid biosynthetic process	13	3	1.77	821	0.2568	0.09214
GO:1901880	negative regulation of protein depolymerization	14	3	1.91	878	0.29625	0.09216
GO:0031345	negative regulation of cell projection organization	15	3	2.05	936	0.33601	0.09219
GO:0007530	sex determination	26	4	3.55	1157	0.48175	0.09226
GO:0042335	cuticle development	153	21	20.86	1303	0.52323	0.09231
GO:0009247	glycolipid biosynthetic process	39	5	5.32	1558	0.6298	0.09238
GO:0006726	eye pigment biosynthetic process	35	4	4.77	1835	0.72202	0.09245
GO:0034504	protein localization to nucleus	65	8	8.86	1714	0.67733	0.09247
GO:0035218	leg disc development	97	10	13.23	2326	0.86878	0.09283
GO:1901137	carbohydrate derivative biosynthetic process	257	29	35.04	2406	0.88883	0.09329
GO:0019233	sensory perception of pain	71	14	9.68	480	0.09632	0.09576
GO:0009312	oligosaccharide biosynthetic process	19	5	2.59	487	0.10589	0.10556
GO:0006631	fatty acid metabolic process	90	34	12.27	11	7.6e-09	0.10773
GO:0030163	protein catabolic process	275	47	37.5	365	0.05683	0.10959
GO:0009611	response to wounding	109	21	14.86	389	0.06133	0.11153
GO:0007034	vacuolar transport	45	8	6.14	837	0.265	0.11191
GO:0015718	monocarboxylic acid transport	23	5	3.14	705	0.196	0.11191
GO:0045476	nurse cell apoptotic process	19	5	2.59	488	0.10589	0.11246
GO:0000463	maturation of LSU-rRNA from tricistronic rRNA transcript (SSU-rRNA, 5.8S rRNA, LSU-rRNA)	9	3	1.23	498	0.11286	0.11261
GO:0005991	trehalose metabolic process	9	3	1.23	499	0.11286	0.11261
GO:0006071	glycerol metabolic process	9	3	1.23	500	0.11286	0.11261
GO:0006376	mRNA splice site selection	9	3	1.23	501	0.11286	0.11261
GO:0006465	signal peptide processing	9	3	1.23	502	0.11286	0.11261
GO:0006855	drug transmembrane transport	9	3	1.23	503	0.11286	0.11261
GO:0007395	dorsal closure, spreading of leading edge cells	9	3	1.23	504	0.11286	0.11261
GO:0008348	negative regulation of antimicrobial humoral response	9	3	1.23	505	0.11286	0.11261
GO:0009253	peptidoglycan catabolic process	9	3	1.23	506	0.11286	0.11261
GO:0010592	positive regulation of lamellipodium assembly	9	3	1.23	507	0.11286	0.11261
GO:0046653	tetrahydrofolate metabolic process	9	3	1.23	508	0.11286	0.11261
GO:0009152	purine ribonucleotide biosynthetic process	79	7	10.77	2565	0.92763	0.11359
GO:0022904	respiratory electron transport chain	68	4	9.27	2932	0.98781	0.11435
GO:0045165	cell fate commitment	287	29	39.13	2829	0.97256	0.11559
GO:0016310	phosphorylation	535	55	72.95	2995	0.99346	0.11821
GO:0045886	negative regulation of synaptic growth at neuromuscular junction	43	9	5.86	528	0.12254	0.12201
GO:0009267	cellular response to starvation	63	11	8.59	755	0.23378	0.12202
GO:0007314	oocyte anterior/posterior axis specification	84	11	11.45	1518	0.60614	0.12679
GO:0019752	carboxylic acid metabolic process	329	97	44.86	1	1.4e-14	0.12838
GO:0009056	catabolic process	815	162	111.13	16	1.1e-07	0.1292
GO:0009063	cellular amino acid catabolic process	39	18	5.32	20	8.5e-07	0.13473
GO:1901605	alpha-amino acid metabolic process	91	36	12.41	5	6.2e-10	0.13499
GO:0006643	membrane lipid metabolic process	93	23	12.68	116	0.00277	0.13502
GO:0032970	regulation of actin filament-based process	91	20	12.41	221	0.01911	0.13537
GO:0010466	negative regulation of peptidase activity	25	11	3.41	51	0.00021	0.13538
GO:0034440	lipid oxidation	35	11	4.77	140	0.00526	0.13555
GO:0045898	regulation of RNA polymerase II transcriptional preinitiation complex assembly	9	7	1.23	35	2.4e-05	0.13561
GO:0009615	response to virus	45	11	6.14	301	0.03579	0.13572
GO:0046500	S-adenosylmethionine metabolic process	8	5	1.09	106	0.00183	0.13584
GO:0002252	immune effector process	112	19	15.27	654	0.18334	0.13586
GO:0045089	positive regulation of innate immune response	49	9	6.68	716	0.21726	0.13587
GO:1902742	apoptotic process involved in development	22	6	3	405	0.06865	0.13596
GO:1901652	response to peptide	52	10	7.09	616	0.16299	0.13597
GO:0006555	methionine metabolic process	16	5	2.18	360	0.05598	0.13598
GO:0008272	sulfate transport	9	4	1.23	256	0.02453	0.13599
GO:0016074	snoRNA metabolic process	9	4	1.23	257	0.02453	0.13599
GO:0005984	disaccharide metabolic process	10	4	1.36	308	0.03655	0.136
GO:0007178	transmembrane receptor protein serine/threonine kinase signaling pathway	69	12	9.41	750	0.22465	0.13601
GO:0031348	negative regulation of defense response	33	7	4.5	611	0.15376	0.13602
GO:0031344	regulation of cell projection organization	116	18	15.82	914	0.31425	0.13606
GO:0006595	polyamine metabolic process	6	3	0.82	314	0.03672	0.13606
GO:0043650	dicarboxylic acid biosynthetic process	6	3	0.82	315	0.03672	0.13606
GO:0045297	post-mating behavior	8	3	1.09	444	0.08341	0.13609
GO:0051984	positive regulation of chromosome segregation	8	3	1.09	445	0.08341	0.13609
GO:0048102	autophagic cell death	31	6	4.23	758	0.24099	0.13611
GO:0032365	intracellular lipid transport	9	3	1.23	509	0.11286	0.13611
GO:0030072	peptide hormone secretion	12	3	1.64	724	0.21815	0.13616
GO:0048017	inositol lipid-mediated signaling	12	3	1.64	725	0.21815	0.13616
GO:0007492	endoderm development	6	2	0.82	660	0.19189	0.13619
GO:0021954	central nervous system neuron development	6	2	0.82	661	0.19189	0.13619
GO:0022604	regulation of cell morphogenesis	124	18	16.91	1078	0.42605	0.1362
GO:0042168	heme metabolic process	15	3	2.05	937	0.33601	0.13621
GO:0035268	protein mannosylation	9	2	1.23	968	0.35286	0.13624
GO:0035194	posttranscriptional gene silencing by RNA	54	8	7.36	1144	0.45916	0.13625
GO:0000097	sulfur amino acid biosynthetic process	10	2	1.36	1032	0.40469	0.13625
GO:0007272	ensheathment of neurons	12	2	1.64	1178	0.50168	0.13629
GO:0010847	regulation of chromatin assembly	12	2	1.64	1179	0.50168	0.13629
GO:0002097	tRNA wobble base modification	13	2	1.77	1321	0.5462	0.13631
GO:0043063	intercellular bridge organization	13	2	1.77	1322	0.5462	0.13631
GO:0060033	anatomical structure regression	59	8	8.04	1348	0.56452	0.13634
GO:0042387	plasmatocyte differentiation	15	2	2.05	1540	0.62661	0.13634
GO:0061057	peptidoglycan recognition protein signaling pathway	22	6	3	406	0.06865	0.13651
GO:0031497	chromatin assembly	40	3	5.45	2552	0.92449	0.13665
GO:1901135	carbohydrate derivative metabolic process	500	65	68.18	1724	0.6858	0.13676
GO:0002066	columnar/cuboidal epithelial cell development	274	32	37.36	2293	0.85379	0.13703
GO:0072329	monocarboxylic acid catabolic process	48	18	6.54	37	2.9e-05	0.1377
GO:0006665	sphingolipid metabolic process	57	18	7.77	67	0.00037	0.13796
GO:0009791	post-embryonic development	553	62	75.4	2776	0.96552	0.13815
GO:0000054	ribosomal subunit export from nucleus	12	7	1.64	65	0.00036	0.13905
GO:0044270	cellular nitrogen compound catabolic process	163	27	22.23	615	0.16168	0.13916
GO:1902904	negative regulation of supramolecular fiber organization	26	7	3.55	356	0.05428	0.13947
GO:0016056	rhodopsin mediated signaling pathway	22	5	3	630	0.17135	0.13979
GO:0071322	cellular response to carbohydrate stimulus	11	3	1.5	639	0.18087	0.1399
GO:0072583	clathrin-dependent endocytosis	19	4	2.59	812	0.25461	0.13992
GO:0000467	exonucleolytic trimming to generate mature 3'-end of 5.8S rRNA from tricistronic rRNA transcript (SS...	5	2	0.68	550	0.14016	0.13994
GO:0002011	morphogenesis of an epithelial sheet	5	2	0.68	551	0.14016	0.13994
GO:0006108	malate metabolic process	5	2	0.68	552	0.14016	0.13994
GO:0006537	glutamate biosynthetic process	5	2	0.68	553	0.14016	0.13994
GO:0006596	polyamine biosynthetic process	5	2	0.68	554	0.14016	0.13994
GO:0015697	quaternary ammonium group transport	5	2	0.68	555	0.14016	0.13994
GO:0015740	C4-dicarboxylate transport	5	2	0.68	556	0.14016	0.13994
GO:0015858	nucleoside transport	5	2	0.68	557	0.14016	0.13994
GO:0016336	establishment or maintenance of polarity of larval imaginal disc epithelium	5	2	0.68	558	0.14016	0.13994
GO:0023058	adaptation of signaling pathway	5	2	0.68	559	0.14016	0.13994
GO:0030834	regulation of actin filament depolymerization	5	2	0.68	560	0.14016	0.13994
GO:0032351	negative regulation of hormone metabolic process	5	2	0.68	561	0.14016	0.13994
GO:0032469	endoplasmic reticulum calcium ion homeostasis	5	2	0.68	562	0.14016	0.13994
GO:0032780	negative regulation of ATPase activity	5	2	0.68	563	0.14016	0.13994
GO:0034284	response to monosaccharide	5	2	0.68	564	0.14016	0.13994
GO:0034315	regulation of Arp2/3 complex-mediated actin nucleation	5	2	0.68	565	0.14016	0.13994
GO:0034755	iron ion transmembrane transport	5	2	0.68	566	0.14016	0.13994
GO:0043096	purine nucleobase salvage	5	2	0.68	567	0.14016	0.13994
GO:0045745	positive regulation of G-protein coupled receptor protein signaling pathway	5	2	0.68	568	0.14016	0.13994
GO:0048047	mating behavior, sex discrimination	5	2	0.68	569	0.14016	0.13994
GO:0051496	positive regulation of stress fiber assembly	5	2	0.68	570	0.14016	0.13994
GO:0071243	cellular response to arsenic-containing substance	5	2	0.68	571	0.14016	0.13994
GO:0071276	cellular response to cadmium ion	5	2	0.68	572	0.14016	0.13994
GO:0072578	neurotransmitter-gated ion channel clustering	5	2	0.68	573	0.14016	0.13994
GO:0090163	establishment of epithelial cell planar polarity	5	2	0.68	574	0.14016	0.13994
GO:0097191	extrinsic apoptotic signaling pathway	5	2	0.68	575	0.14016	0.13994
GO:0042157	lipoprotein metabolic process	60	8	8.18	1365	0.58453	0.14028
GO:0046474	glycerophospholipid biosynthetic process	46	6	6.27	1523	0.61191	0.1403
GO:0042176	regulation of protein catabolic process	56	7	7.64	1677	0.65698	0.14038
GO:0002164	larval development	142	24	19.36	608	0.15358	0.14433
GO:0034314	Arp2/3 complex-mediated actin nucleation	15	5	2.05	330	0.04317	0.14486
GO:0002230	positive regulation of defense response to virus by host	10	3	1.36	582	0.14556	0.14526
GO:0006094	gluconeogenesis	10	3	1.36	583	0.14556	0.14526
GO:0006309	apoptotic DNA fragmentation	10	3	1.36	584	0.14556	0.14526
GO:0009070	serine family amino acid biosynthetic process	10	3	1.36	585	0.14556	0.14526
GO:0030589	pseudocleavage involved in syncytial blastoderm formation	10	3	1.36	586	0.14556	0.14526
GO:0035160	maintenance of epithelial integrity, open tracheal system	10	3	1.36	587	0.14556	0.14526
GO:0042306	regulation of protein import into nucleus	10	3	1.36	588	0.14556	0.14526
GO:0060326	cell chemotaxis	10	3	1.36	589	0.14556	0.14526
GO:0005975	carbohydrate metabolic process	230	47	31.36	111	0.00247	0.14707
GO:0051491	positive regulation of filopodium assembly	21	5	2.86	599	0.14801	0.14759
GO:0046843	dorsal appendage formation	45	9	6.14	606	0.15123	0.15062
GO:1901362	organic cyclic compound biosynthetic process	1292	127	176.17	3210	1	0.15339
GO:0032956	regulation of actin cytoskeleton organization	90	19	12.27	289	0.03246	0.16192
GO:0007608	sensory perception of smell	52	10	7.09	617	0.16299	0.1623
GO:0006081	cellular aldehyde metabolic process	24	7	3.27	303	0.03634	0.16314
GO:0007370	ventral furrow formation	16	4	2.18	621	0.1643	0.1639
GO:0018990	ecdysis, chitin-based cuticle	16	4	2.18	622	0.1643	0.1639
GO:0035212	cell competition in a multicellular organism	16	4	2.18	623	0.1643	0.1639
GO:0018130	heterocycle biosynthetic process	1260	122	171.8	3212	1	0.16404
GO:0019991	septate junction assembly	46	9	6.27	625	0.16672	0.16606
GO:0008654	phospholipid biosynthetic process	68	11	9.27	920	0.31926	0.171
GO:0007266	Rho protein signal transduction	52	8	7.09	1059	0.41548	0.17139
GO:0001666	response to hypoxia	49	7	6.68	1215	0.50983	0.17167
GO:0000462	maturation of SSU-rRNA from tricistronic rRNA transcript (SSU-rRNA, 5.8S rRNA, LSU-rRNA)	33	7	4.5	612	0.15376	0.17247
GO:0006520	cellular amino acid metabolic process	153	44	20.86	18	6.1e-07	0.17267
GO:1901575	organic substance catabolic process	666	140	90.81	12	2.7e-08	0.17672
GO:0006641	triglyceride metabolic process	29	10	3.95	123	0.00365	0.17888
GO:1901136	carbohydrate derivative catabolic process	66	15	9	279	0.02967	0.17889
GO:0006006	glucose metabolic process	34	9	4.64	295	0.03439	0.17948
GO:0045924	regulation of female receptivity	18	4	2.45	745	0.2233	0.1805
GO:0002027	regulation of heart rate	11	3	1.5	640	0.18087	0.18051
GO:0006072	glycerol-3-phosphate metabolic process	11	3	1.5	641	0.18087	0.18051
GO:0046959	habituation	11	3	1.5	642	0.18087	0.18051
GO:0051181	cofactor transport	11	3	1.5	643	0.18087	0.18051
GO:0090303	positive regulation of wound healing	11	3	1.5	644	0.18087	0.18051
GO:0030031	cell projection assembly	122	14	16.63	2070	0.79507	0.18201
GO:0042254	ribosome biogenesis	202	50	27.54	32	1.3e-05	0.18312
GO:0000902	cell morphogenesis	527	55	71.86	2960	0.99052	0.18355
GO:0006807	nitrogen compound metabolic process	3931	530	536	1701	0.66452	0.18538
GO:0051050	positive regulation of transport	94	17	12.82	538	0.13394	0.19073
GO:0044275	cellular carbohydrate catabolic process	20	6	2.73	339	0.04513	0.191
GO:0032102	negative regulation of response to external stimulus	21	6	2.86	361	0.05615	0.19104
GO:0006308	DNA catabolic process	19	5	2.59	489	0.10589	0.19125
GO:0006206	pyrimidine nucleobase metabolic process	13	4	1.77	463	0.08933	0.1913
GO:0031047	gene silencing by RNA	69	11	9.41	949	0.3372	0.19148
GO:0019674	NAD metabolic process	11	3	1.5	645	0.18087	0.19151
GO:0031057	negative regulation of histone modification	11	3	1.5	646	0.18087	0.19151
GO:0007620	copulation	12	3	1.64	726	0.21815	0.19155
GO:0046129	purine ribonucleoside biosynthetic process	12	3	1.64	727	0.21815	0.19155
GO:0001678	cellular glucose homeostasis	6	2	0.82	662	0.19189	0.1916
GO:0006145	purine nucleobase catabolic process	6	2	0.82	663	0.19189	0.1916
GO:0006303	double-strand break repair via nonhomologous end joining	6	2	0.82	664	0.19189	0.1916
GO:0006655	phosphatidylglycerol biosynthetic process	6	2	0.82	665	0.19189	0.1916
GO:0006689	ganglioside catabolic process	6	2	0.82	666	0.19189	0.1916
GO:0006716	juvenile hormone metabolic process	6	2	0.82	667	0.19189	0.1916
GO:0006817	phosphate ion transport	6	2	0.82	668	0.19189	0.1916
GO:0006939	smooth muscle contraction	6	2	0.82	669	0.19189	0.1916
GO:0014067	negative regulation of phosphatidylinositol 3-kinase signaling	6	2	0.82	670	0.19189	0.1916
GO:0017183	peptidyl-diphthamide biosynthetic process from peptidyl-histidine	6	2	0.82	671	0.19189	0.1916
GO:0019321	pentose metabolic process	6	2	0.82	672	0.19189	0.1916
GO:0030336	negative regulation of cell migration	6	2	0.82	673	0.19189	0.1916
GO:0032922	circadian regulation of gene expression	6	2	0.82	674	0.19189	0.1916
GO:0035094	response to nicotine	6	2	0.82	675	0.19189	0.1916
GO:0045823	positive regulation of heart contraction	6	2	0.82	676	0.19189	0.1916
GO:0046085	adenosine metabolic process	6	2	0.82	677	0.19189	0.1916
GO:0048526	imaginal disc-derived wing expansion	6	2	0.82	678	0.19189	0.1916
GO:0050994	regulation of lipid catabolic process	6	2	0.82	679	0.19189	0.1916
GO:0097206	nephrocyte filtration	6	2	0.82	680	0.19189	0.1916
GO:1990182	exosomal secretion	6	2	0.82	681	0.19189	0.1916
GO:0006892	post-Golgi vesicle-mediated transport	36	6	4.91	993	0.36638	0.19163
GO:0045047	protein targeting to ER	15	3	2.05	938	0.33601	0.19167
GO:0035195	gene silencing by miRNA	32	5	4.36	1094	0.44685	0.19176
GO:0019359	nicotinamide nucleotide biosynthetic process	25	3	3.41	1717	0.68221	0.19206
GO:0045807	positive regulation of endocytosis	30	7	4.09	485	0.10428	0.19209
GO:0030536	larval feeding behavior	17	4	2.32	697	0.1931	0.19264
GO:0043524	negative regulation of neuron apoptotic process	17	4	2.32	698	0.1931	0.19264
GO:0048072	compound eye pigmentation	17	4	2.32	699	0.1931	0.19264
GO:0007526	larval somatic muscle development	29	6	3.95	703	0.19487	0.19429
GO:0008150	biological_process	7937	1083	1082.23	1117	0.4538	0.19762
GO:0007369	gastrulation	72	12	9.82	840	0.27174	0.2174
GO:0000060	protein import into nucleus, translocation	12	3	1.64	728	0.21815	0.21774
GO:0007482	haltere development	12	3	1.64	729	0.21815	0.21774
GO:0031440	regulation of mRNA 3'-end processing	12	3	1.64	730	0.21815	0.21774
GO:0006497	protein lipidation	55	6	7.5	2058	0.77936	0.21893
GO:0008103	oocyte microtubule cytoskeleton polarization	18	4	2.45	746	0.2233	0.2228
GO:0050770	regulation of axonogenesis	43	7	5.86	995	0.36963	0.223
GO:0035220	wing disc development	341	38	46.5	2579	0.9297	0.22536
GO:0030258	lipid modification	79	18	10.77	216	0.01789	0.24299
GO:0046700	heterocycle catabolic process	165	27	22.5	638	0.17818	0.24393
GO:0051494	negative regulation of cytoskeleton organization	29	7	3.95	474	0.09001	0.24446
GO:0060180	female mating behavior	25	6	3.41	519	0.1149	0.24462
GO:0001522	pseudouridine synthesis	14	4	1.91	494	0.11214	0.24479
GO:0060179	male mating behavior	56	9	7.64	967	0.35239	0.24504
GO:0048260	positive regulation of receptor-mediated endocytosis	13	3	1.77	822	0.2568	0.24509
GO:0006207	'de novo' pyrimidine nucleobase biosynthetic process	7	2	0.95	764	0.2455	0.24515
GO:0007477	notum development	7	2	0.95	765	0.2455	0.24515
GO:0009074	aromatic amino acid family catabolic process	7	2	0.95	766	0.2455	0.24515
GO:0009226	nucleotide-sugar biosynthetic process	7	2	0.95	767	0.2455	0.24515
GO:0009396	folic acid-containing compound biosynthetic process	7	2	0.95	768	0.2455	0.24515
GO:0016486	peptide hormone processing	7	2	0.95	769	0.2455	0.24515
GO:0030512	negative regulation of transforming growth factor beta receptor signaling pathway	7	2	0.95	770	0.2455	0.24515
GO:0031118	rRNA pseudouridine synthesis	7	2	0.95	771	0.2455	0.24515
GO:0032367	intracellular cholesterol transport	7	2	0.95	772	0.2455	0.24515
GO:0032368	regulation of lipid transport	7	2	0.95	773	0.2455	0.24515
GO:0034394	protein localization to cell surface	7	2	0.95	774	0.2455	0.24515
GO:0042595	behavioral response to starvation	7	2	0.95	775	0.2455	0.24515
GO:0044036	cell wall macromolecule metabolic process	7	2	0.95	776	0.2455	0.24515
GO:0044130	negative regulation of growth of symbiont in host	7	2	0.95	777	0.2455	0.24515
GO:0045842	positive regulation of mitotic metaphase/anaphase transition	7	2	0.95	778	0.2455	0.24515
GO:0046902	regulation of mitochondrial membrane permeability	7	2	0.95	779	0.2455	0.24515
GO:0048042	regulation of post-mating oviposition	7	2	0.95	780	0.2455	0.24515
GO:0007485	imaginal disc-derived male genitalia development	23	4	3.14	1015	0.38516	0.24522
GO:0050919	negative chemotaxis	18	3	2.45	1106	0.45304	0.24533
GO:0007041	lysosomal transport	19	3	2.59	1166	0.49025	0.24537
GO:0003382	epithelial cell morphogenesis	25	3	3.41	1718	0.68221	0.24566
GO:0033993	response to lipid	69	8	9.41	1939	0.74161	0.24601
GO:0045087	innate immune response	179	33	24.41	326	0.0413	0.2472
GO:0044283	small molecule biosynthetic process	199	44	27.13	72	0.00064	0.2503
GO:0008063	Toll signaling pathway	42	13	5.73	118	0.00291	0.25084
GO:0002376	immune system process	405	66	55.22	402	0.06575	0.2516
GO:0008154	actin polymerization or depolymerization	66	16	9	201	0.01396	0.25253
GO:0015918	sterol transport	21	9	2.86	84	0.00099	0.25273
GO:0052547	regulation of peptidase activity	55	13	7.5	283	0.03072	0.25286
GO:0006144	purine nucleobase metabolic process	17	7	2.32	135	0.0048	0.25305
GO:0006534	cysteine metabolic process	9	5	1.23	127	0.00365	0.25325
GO:0031669	cellular response to nutrient levels	65	12	8.86	627	0.16778	0.25338
GO:0031333	negative regulation of protein complex assembly	14	5	1.91	287	0.03231	0.2534
GO:0042454	ribonucleoside catabolic process	9	4	1.23	258	0.02453	0.25346
GO:0051156	glucose 6-phosphate metabolic process	9	4	1.23	259	0.02453	0.25346
GO:0046174	polyol catabolic process	10	4	1.36	309	0.03655	0.25349
GO:0070201	regulation of establishment of protein localization	55	10	7.5	715	0.20966	0.25352
GO:0071363	cellular response to growth factor stimulus	70	12	9.54	757	0.23997	0.25353
GO:0006760	folic acid-containing compound metabolic process	12	4	1.64	413	0.06902	0.25355
GO:0046364	monosaccharide biosynthetic process	12	4	1.64	414	0.06902	0.25355
GO:0071375	cellular response to peptide hormone stimulus	49	9	6.68	717	0.21726	0.25356
GO:0016335	morphogenesis of larval imaginal disc epithelium	7	3	0.95	375	0.05785	0.25362
GO:0051492	regulation of stress fiber assembly	7	3	0.95	376	0.05785	0.25362
GO:0051402	neuron apoptotic process	23	5	3.14	706	0.196	0.25366
GO:0051047	positive regulation of secretion	27	5	3.68	909	0.30401	0.25378
GO:0019538	protein metabolic process	1989	272	271.2	1165	0.48928	0.25382
GO:0061058	regulation of peptidoglycan recognition protein signaling pathway	7	2	0.95	781	0.2455	0.25384
GO:1903900	regulation of viral life cycle	7	2	0.95	782	0.2455	0.25384
GO:0000394	RNA splicing, via endonucleolytic cleavage and ligation	9	2	1.23	969	0.35286	0.2539
GO:0006720	isoprenoid metabolic process	24	4	3.27	1061	0.41784	0.25391
GO:0043279	response to alkaloid	24	4	3.27	1062	0.41784	0.25391
GO:0006613	cotranslational protein targeting to membrane	11	2	1.5	1118	0.45443	0.25396
GO:0009725	response to hormone	122	17	16.63	1203	0.50174	0.25399
GO:2001252	positive regulation of chromosome organization	50	7	6.82	1309	0.53233	0.25403
GO:1903322	positive regulation of protein modification by small protein conjugation or removal	16	2	2.18	1678	0.66246	0.25411
GO:0019932	second-messenger-mediated signaling	61	8	8.32	1515	0.6041	0.25414
GO:0050920	regulation of chemotaxis	20	2	2.73	2046	0.77877	0.25423
GO:0070252	actin-mediated cell contraction	20	2	2.73	2047	0.77877	0.25423
GO:0033047	regulation of mitotic sister chromatid segregation	31	3	4.23	2147	0.81472	0.25434
GO:0031929	TOR signaling	58	6	7.91	2160	0.82114	0.25449
GO:0023061	signal release	125	15	17.04	1941	0.74242	0.25452
GO:0009913	epidermal cell differentiation	46	4	6.27	2429	0.89011	0.25456
GO:0001667	ameboidal-type cell migration	173	21	23.59	1952	0.75116	0.25464
GO:0006164	purine nucleotide biosynthetic process	81	8	11.04	2378	0.87923	0.25474
GO:0045862	positive regulation of proteolysis	52	4	7.09	2601	0.93738	0.25474
GO:0007179	transforming growth factor beta receptor signaling pathway	20	5	2.73	532	0.12614	0.25585
GO:0045610	regulation of hemocyte differentiation	26	5	3.55	848	0.27596	0.25623
GO:0030322	stabilization of membrane potential	13	3	1.77	823	0.2568	0.25634
GO:0042632	cholesterol homeostasis	13	3	1.77	824	0.2568	0.25634
GO:0045773	positive regulation of axon extension	13	3	1.77	825	0.2568	0.25634
GO:0050714	positive regulation of protein secretion	13	3	1.77	826	0.2568	0.25634
GO:0003002	regionalization	408	42	55.63	2912	0.98445	0.25718
GO:0044249	cellular biosynthetic process	2088	258	284.7	2872	0.97904	0.25808
GO:0048729	tissue morphogenesis	556	52	75.81	3132	0.99943	0.25962
GO:0015031	protein transport	401	44	54.68	2714	0.95562	0.26212
GO:0042060	wound healing	82	14	11.18	742	0.22143	0.27116
GO:0000381	regulation of alternative mRNA splicing, via spliceosome	79	13	10.77	845	0.27568	0.27456
GO:0031122	cytoplasmic microtubule organization	26	5	3.55	849	0.27596	0.2753
GO:0045824	negative regulation of innate immune response	26	5	3.55	850	0.27596	0.2753
GO:0042048	olfactory behavior	68	8	9.27	1859	0.72642	0.2771
GO:0000387	spliceosomal snRNP assembly	20	4	2.73	866	0.28673	0.28614
GO:0045793	positive regulation of cell size	33	6	4.5	872	0.28993	0.28917
GO:0007507	heart development	97	13	13.23	1355	0.57213	0.29048
GO:0010906	regulation of glucose metabolic process	14	3	1.91	879	0.29625	0.29574
GO:0030514	negative regulation of BMP signaling pathway	14	3	1.91	880	0.29625	0.29574
GO:0016476	regulation of embryonic cell shape	25	4	3.41	1097	0.45009	0.296
GO:0030010	establishment of cell polarity	55	7	7.5	1565	0.63763	0.29656
GO:1902532	negative regulation of intracellular signal transduction	94	18	12.82	432	0.08269	0.2974
GO:0030833	regulation of actin filament polymerization	53	12	7.23	344	0.04987	0.29758
GO:0043484	regulation of RNA splicing	91	15	12.41	809	0.25332	0.29845
GO:0006536	glutamate metabolic process	13	4	1.77	464	0.08933	0.2986
GO:0035309	wing and notum subfield formation	13	3	1.77	827	0.2568	0.299
GO:0006044	N-acetylglucosamine metabolic process	8	2	1.09	888	0.29953	0.29913
GO:0009642	response to light intensity	8	2	1.09	889	0.29953	0.29913
GO:0046664	dorsal closure, amnioserosa morphology change	8	2	1.09	890	0.29953	0.29913
GO:0046673	negative regulation of compound eye retinal cell programmed cell death	8	2	1.09	891	0.29953	0.29913
GO:0048148	behavioral response to cocaine	8	2	1.09	892	0.29953	0.29913
GO:1900407	regulation of cellular response to oxidative stress	8	2	1.09	893	0.29953	0.29913
GO:1901739	regulation of myoblast fusion	8	2	1.09	894	0.29953	0.29913
GO:1904059	regulation of locomotor rhythm	8	2	1.09	895	0.29953	0.29913
GO:0046661	male sex differentiation	29	4	3.95	1354	0.57176	0.29947
GO:0006875	cellular metal ion homeostasis	75	10	10.23	1362	0.58185	0.29958
GO:0003333	amino acid transmembrane transport	33	6	4.5	873	0.28993	0.30318
GO:0050829	defense response to Gram-negative bacterium	88	18	12	343	0.04838	0.31556
GO:0031532	actin cytoskeleton reorganization	28	5	3.82	931	0.33245	0.31871
GO:0007610	behavior	485	65	66.13	1364	0.58268	0.32021
GO:0007520	myoblast fusion	49	9	6.68	718	0.21726	0.32109
GO:0030431	sleep	74	9	10.09	1787	0.69538	0.32407
GO:0045454	cell redox homeostasis	28	5	3.82	932	0.33245	0.33172
GO:0051603	proteolysis involved in cellular protein catabolic process	249	40	33.95	601	0.14915	0.33256
GO:0007254	JNK cascade	67	13	9.14	523	0.11714	0.33385
GO:0000470	maturation of LSU-rRNA	24	6	3.27	481	0.09806	0.33448
GO:0008286	insulin receptor signaling pathway	41	8	5.59	655	0.18761	0.33466
GO:0007303	cytoplasmic transport, nurse cell to oocyte	15	3	2.05	939	0.33601	0.33546
GO:0019236	response to pheromone	15	3	2.05	940	0.33601	0.33546
GO:0031167	rRNA methylation	15	3	2.05	941	0.33601	0.33546
GO:0060857	establishment of glial blood-brain barrier	15	3	2.05	942	0.33601	0.33546
GO:0035071	salivary gland cell autophagic cell death	30	5	4.09	1020	0.38983	0.33549
GO:0010508	positive regulation of autophagy	31	5	4.23	1071	0.41846	0.33556
GO:0007623	circadian rhythm	150	16	20.45	2386	0.88575	0.33591
GO:0048675	axon extension	48	8	6.54	928	0.32818	0.35129
GO:0007430	terminal branching, open tracheal system	22	4	3	960	0.35226	0.35159
GO:1901215	negative regulation of neuron death	26	6	3.55	536	0.13309	0.35167
GO:0016049	cell growth	145	22	19.77	927	0.32798	0.35176
GO:0044242	cellular lipid catabolic process	74	24	10.09	36	2.6e-05	0.35178
GO:0032101	regulation of response to external stimulus	117	29	15.95	81	0.0008	0.352
GO:0051668	localization within membrane	23	4	3.14	1016	0.38516	0.35238
GO:0007523	larval visceral muscle development	9	2	1.23	970	0.35286	0.35242
GO:0010565	regulation of cellular ketone metabolic process	9	2	1.23	971	0.35286	0.35242
GO:0016332	establishment or maintenance of polarity of embryonic epithelium	9	2	1.23	972	0.35286	0.35242
GO:0034334	adherens junction maintenance	9	2	1.23	973	0.35286	0.35242
GO:0035041	sperm chromatin decondensation	9	2	1.23	974	0.35286	0.35242
GO:0046845	branched duct epithelial cell fate determination, open tracheal system	9	2	1.23	975	0.35286	0.35242
GO:0071028	nuclear mRNA surveillance	9	2	1.23	976	0.35286	0.35242
GO:0071481	cellular response to X-ray	9	2	1.23	977	0.35286	0.35242
GO:1900074	negative regulation of neuromuscular synaptic transmission	9	2	1.23	978	0.35286	0.35242
GO:0030011	maintenance of cell polarity	19	3	2.59	1167	0.49025	0.35258
GO:0072330	monocarboxylic acid biosynthetic process	56	16	7.64	112	0.00253	0.35337
GO:0045860	positive regulation of protein kinase activity	56	6	7.64	2067	0.79404	0.35349
GO:0002807	positive regulation of antimicrobial peptide biosynthetic process	21	10	2.86	49	0.00018	0.35372
GO:1900426	positive regulation of defense response to bacterium	18	9	2.45	60	0.00024	0.35389
GO:0048639	positive regulation of developmental growth	78	16	10.64	384	0.05899	0.35421
GO:0019395	fatty acid oxidation	34	10	4.64	193	0.01265	0.35422
GO:0019637	organophosphate metabolic process	359	53	48.95	865	0.28416	0.35454
GO:0072523	purine-containing compound catabolic process	18	6	2.45	270	0.0274	0.35474
GO:1901658	glycosyl compound catabolic process	14	5	1.91	288	0.03231	0.35487
GO:0008277	regulation of G-protein coupled receptor protein signaling pathway	25	6	3.41	520	0.1149	0.35501
GO:0046503	glycerolipid catabolic process	11	4	1.5	348	0.05139	0.35503
GO:0000466	maturation of 5.8S rRNA from tricistronic rRNA transcript (SSU-rRNA, 5.8S rRNA, LSU-rRNA)	13	4	1.77	465	0.08933	0.35511
GO:0030042	actin filament depolymerization	8	3	1.09	446	0.08341	0.3552
GO:0046686	response to cadmium ion	8	3	1.09	447	0.08341	0.3552
GO:0043624	cellular protein complex disassembly	39	7	5.32	860	0.27698	0.35526
GO:0061572	actin filament bundle organization	33	6	4.5	874	0.28993	0.35531
GO:0051222	positive regulation of protein transport	26	5	3.55	851	0.27596	0.35533
GO:0006721	terpenoid metabolic process	12	3	1.64	731	0.21815	0.35535
GO:0055072	iron ion homeostasis	13	3	1.77	828	0.2568	0.35539
GO:0097190	apoptotic signaling pathway	43	7	5.86	996	0.36963	0.35542
GO:0002118	aggressive behavior	14	3	1.91	881	0.29625	0.35543
GO:0007450	dorsal/ventral pattern formation, imaginal disc	51	8	6.95	1028	0.39354	0.35544
GO:0051238	sequestering of metal ion	8	2	1.09	896	0.29953	0.35548
GO:0007309	oocyte axis specification	119	17	16.23	1143	0.45804	0.35552
GO:0050732	negative regulation of peptidyl-tyrosine phosphorylation	9	2	1.23	979	0.35286	0.35552
GO:0018208	peptidyl-proline modification	24	4	3.27	1063	0.41784	0.35553
GO:0097035	regulation of membrane lipid distribution	10	2	1.36	1033	0.40469	0.35556
GO:0001707	mesoderm formation	25	4	3.41	1098	0.45009	0.35557
GO:0045611	negative regulation of hemocyte differentiation	12	2	1.64	1180	0.50168	0.35564
GO:0014009	glial cell proliferation	13	2	1.77	1323	0.5462	0.35567
GO:0002218	activation of innate immune response	17	2	2.32	1789	0.69549	0.35583
GO:0002764	immune response-regulating signaling pathway	17	2	2.32	1790	0.69549	0.35583
GO:0035264	multicellular organism growth	48	6	6.54	1675	0.65453	0.35589
GO:1903364	positive regulation of cellular protein catabolic process	27	3	3.68	1864	0.73281	0.35593
GO:0090174	organelle membrane fusion	70	8	9.54	1980	0.75621	0.35618
GO:1902875	regulation of embryonic pattern specification	28	2	3.82	2491	0.91096	0.35625
GO:0010942	positive regulation of cell death	83	9	11.32	2150	0.81591	0.3564
GO:0007264	small GTPase mediated signal transduction	219	22	29.86	2723	0.9571	0.35764
GO:0042886	amide transport	414	47	56.45	2588	0.9311	0.35854
GO:0015833	peptide transport	411	46	56.04	2645	0.94312	0.35871
GO:0016321	female meiosis chromosome segregation	29	5	3.95	986	0.36111	0.36035
GO:0048646	anatomical structure formation involved in morphogenesis	449	42	61.22	3078	0.99822	0.36176
GO:1901576	organic substance biosynthetic process	2120	266	289.07	2735	0.96	0.36452
GO:0006633	fatty acid biosynthetic process	34	14	4.64	41	6.9e-05	0.37004
GO:1901700	response to oxygen-containing compound	253	43	34.5	420	0.07111	0.3704
GO:0009636	response to toxic substance	131	26	17.86	278	0.02933	0.3707
GO:0006914	autophagy	155	24	21.13	863	0.28166	0.37382
GO:0016059	deactivation of rhodopsin mediated signaling	16	3	2.18	1003	0.37564	0.37505
GO:0016082	synaptic vesicle priming	16	3	2.18	1004	0.37564	0.37505
GO:0045196	establishment or maintenance of neuroblast polarity	16	3	2.18	1005	0.37564	0.37505
GO:0045494	photoreceptor cell maintenance	16	3	2.18	1006	0.37564	0.37505
GO:0048132	female germ-line stem cell asymmetric division	16	3	2.18	1007	0.37564	0.37505
GO:0008298	intracellular mRNA localization	79	8	10.77	2318	0.86167	0.37716
GO:0010507	negative regulation of autophagy	23	4	3.14	1017	0.38516	0.38446
GO:0019915	lipid storage	45	13	6.14	142	0.00562	0.40122
GO:0009116	nucleoside metabolic process	50	13	6.82	203	0.0143	0.40154
GO:0043277	apoptotic cell clearance	18	5	2.45	459	0.08738	0.4033
GO:0048871	multicellular organismal homeostasis	57	10	7.77	762	0.2435	0.40344
GO:0050708	regulation of protein secretion	23	5	3.14	707	0.196	0.40362
GO:0010004	gastrulation involving germ band extension	31	6	4.23	759	0.24099	0.40366
GO:0006821	chloride transport	34	6	4.64	915	0.31513	0.40386
GO:0042325	regulation of phosphorylation	243	34	33.13	1146	0.46371	0.40409
GO:0006879	cellular iron ion homeostasis	10	2	1.36	1034	0.40469	0.40421
GO:0030381	chorion-containing eggshell pattern formation	10	2	1.36	1035	0.40469	0.40421
GO:0043153	entrainment of circadian clock by photoperiod	10	2	1.36	1036	0.40469	0.40421
GO:0043506	regulation of JUN kinase activity	10	2	1.36	1037	0.40469	0.40421
GO:0045292	mRNA cis splicing, via spliceosome	10	2	1.36	1038	0.40469	0.40421
GO:0060967	negative regulation of gene silencing by RNA	10	2	1.36	1039	0.40469	0.40421
GO:0019216	regulation of lipid metabolic process	36	5	4.91	1336	0.55565	0.40447
GO:0007405	neuroblast proliferation	88	11	12	1704	0.66937	0.405
GO:0043408	regulation of MAPK cascade	141	17	19.23	1945	0.74498	0.4056
GO:0042742	defense response to bacterium	159	33	21.68	165	0.00803	0.40885
GO:0010883	regulation of lipid storage	30	10	4.09	136	0.00482	0.41092
GO:0035002	liquid clearance, open tracheal system	17	3	2.32	1056	0.41475	0.41414
GO:0050832	defense response to fungus	46	11	6.27	327	0.04147	0.41439
GO:0030097	hemopoiesis	81	10	11.04	1715	0.68172	0.4152
GO:0045197	establishment or maintenance of epithelial cell apical/basal polarity	31	5	4.23	1072	0.41846	0.41708
GO:1902476	chloride transmembrane transport	24	4	3.27	1064	0.41784	0.41711
GO:0032456	endocytic recycling	31	5	4.23	1073	0.41846	0.41764
GO:0045451	pole plasm oskar mRNA localization	49	5	6.68	2153	0.8169	0.41886
GO:0010628	positive regulation of gene expression	405	37	55.22	3077	0.99822	0.43146
GO:0046394	carboxylic acid biosynthetic process	103	31	14.04	30	1e-05	0.43795
GO:1901615	organic hydroxy compound metabolic process	133	31	18.13	104	0.0016	0.43929
GO:1901566	organonitrogen compound biosynthetic process	857	142	116.85	141	0.00546	0.43987
GO:0034976	response to endoplasmic reticulum stress	77	14	10.5	613	0.15778	0.44006
GO:0008652	cellular amino acid biosynthetic process	41	14	5.59	76	0.00069	0.4408
GO:0030497	fatty acid elongation	17	10	2.32	33	1.7e-05	0.44104
GO:1904396	regulation of neuromuscular junction development	102	21	13.91	293	0.03281	0.44121
GO:0031334	positive regulation of protein complex assembly	57	13	7.77	323	0.04012	0.44183
GO:0097305	response to alcohol	116	21	15.82	484	0.10377	0.44183
GO:0044106	cellular amine metabolic process	22	8	3	143	0.00633	0.44191
GO:0006576	cellular biogenic amine metabolic process	18	7	2.45	153	0.00695	0.44206
GO:0007617	mating behavior	88	16	12	548	0.13801	0.44223
GO:0051965	positive regulation of synapse assembly	31	8	4.23	353	0.05144	0.44231
GO:0071901	negative regulation of protein serine/threonine kinase activity	13	5	1.77	249	0.02333	0.44249
GO:0009311	oligosaccharide metabolic process	29	7	3.95	475	0.09001	0.44255
GO:0090101	negative regulation of transmembrane receptor protein serine/threonine kinase signaling pathway	23	6	3.14	430	0.08263	0.44261
GO:0042430	indole-containing compound metabolic process	9	4	1.23	260	0.02453	0.44264
GO:1902882	regulation of response to oxidative stress	12	3	1.64	732	0.21815	0.4431
GO:0016999	antibiotic metabolic process	50	8	6.82	998	0.37163	0.44315
GO:0044057	regulation of system process	51	8	6.95	1029	0.39354	0.4432
GO:0006979	response to oxidative stress	117	22	15.95	417	0.07047	0.44321
GO:0030004	cellular monovalent inorganic cation homeostasis	37	6	5.05	1025	0.39219	0.44323
GO:0008363	larval chitin-based cuticle development	23	4	3.14	1018	0.38516	0.44326
GO:0000002	mitochondrial genome maintenance	10	2	1.36	1040	0.40469	0.44333
GO:0010822	positive regulation of mitochondrion organization	10	2	1.36	1041	0.40469	0.44333
GO:0017001	antibiotic catabolic process	11	2	1.5	1119	0.45443	0.44338
GO:0055081	anion homeostasis	11	2	1.5	1120	0.45443	0.44338
GO:0098739	import across plasma membrane	12	2	1.64	1181	0.50168	0.44342
GO:0098754	detoxification	27	4	3.68	1220	0.51267	0.44344
GO:0034097	response to cytokine	13	2	1.77	1324	0.5462	0.44347
GO:0031114	regulation of microtubule depolymerization	14	2	1.91	1476	0.58786	0.44351
GO:0046058	cAMP metabolic process	15	2	2.05	1541	0.62661	0.44356
GO:0009165	nucleotide biosynthetic process	105	14	14.32	1358	0.57972	0.44364
GO:0035601	protein deacylation	17	2	2.32	1791	0.69549	0.44364
GO:1902692	regulation of neuroblast proliferation	44	5	6	1932	0.73521	0.44387
GO:0044085	cellular component biogenesis	1181	160	161.03	1332	0.55293	0.44391
GO:0048278	vesicle docking	37	3	5.05	2443	0.89716	0.44421
GO:0070838	divalent metal ion transport	71	7	9.68	2322	0.86834	0.44442
GO:0014070	response to organic cyclic compound	117	13	15.95	2181	0.82491	0.44451
GO:0070372	regulation of ERK1 and ERK2 cascade	57	4	7.77	2759	0.96172	0.44477
GO:0016571	histone methylation	62	4	8.45	2857	0.97703	0.44499
GO:0019730	antimicrobial humoral response	80	22	10.91	78	0.00077	0.44563
GO:0006099	tricarboxylic acid cycle	32	5	4.36	1095	0.44685	0.44601
GO:0051453	regulation of intracellular pH	32	5	4.36	1096	0.44685	0.44601
GO:0035282	segmentation	220	21	30	2847	0.97518	0.44653
GO:0071805	potassium ion transmembrane transport	44	6	6	1351	0.56652	0.44654
GO:0009628	response to abiotic stimulus	379	35	51.68	3058	0.99706	0.44919
GO:0035149	lumen formation, open tracheal system	25	4	3.41	1099	0.45009	0.44935
GO:0040018	positive regulation of multicellular organism growth	25	4	3.41	1100	0.45009	0.44935
GO:0007616	long-term memory	68	10	9.27	1103	0.45094	0.44973
GO:0098656	anion transmembrane transport	72	16	9.82	282	0.03071	0.45102
GO:0000280	nuclear division	271	13	36.95	3220	1	0.45153
GO:0045176	apical protein localization	18	3	2.45	1107	0.45304	0.45241
GO:0046529	imaginal disc fusion, thorax closure	18	3	2.45	1108	0.45304	0.45241
GO:0031325	positive regulation of cellular metabolic process	658	64	89.72	3125	0.99938	0.45256
GO:0007619	courtship behavior	60	9	8.18	1082	0.43442	0.45376
GO:0007200	phospholipase C-activating G-protein coupled receptor signaling pathway	16	3	2.18	1008	0.37564	0.45376
GO:0003015	heart process	39	6	5.32	1089	0.4436	0.45383
GO:0002121	inter-male aggressive behavior	11	2	1.5	1121	0.45443	0.45392
GO:0007488	histoblast morphogenesis	11	2	1.5	1122	0.45443	0.45392
GO:0016556	mRNA modification	11	2	1.5	1123	0.45443	0.45392
GO:0032465	regulation of cytokinesis	11	2	1.5	1124	0.45443	0.45392
GO:0045572	positive regulation of imaginal disc growth	11	2	1.5	1125	0.45443	0.45392
GO:0046856	phosphatidylinositol dephosphorylation	11	2	1.5	1126	0.45443	0.45392
GO:0048082	regulation of adult chitin-containing cuticle pigmentation	11	2	1.5	1127	0.45443	0.45392
GO:0085029	extracellular matrix assembly	11	2	1.5	1128	0.45443	0.45392
GO:0090254	cell elongation involved in imaginal disc-derived wing morphogenesis	11	2	1.5	1129	0.45443	0.45392
GO:0036011	imaginal disc-derived leg segmentation	26	3	3.55	1820	0.70835	0.45445
GO:0006915	apoptotic process	257	27	35.04	2660	0.94683	0.45594
GO:0051726	regulation of cell cycle	271	22	36.95	3089	0.99844	0.45748
GO:0007626	locomotory behavior	167	15	22.77	2849	0.97551	0.45817
GO:0048190	wing disc dorsal/ventral pattern formation	47	7	6.41	1147	0.46382	0.4628
GO:0006030	chitin metabolic process	69	9	9.41	1520	0.6106	0.46382
GO:0051171	regulation of nitrogen compound metabolic process	1574	160	214.62	3211	1	0.46526
GO:0008360	regulation of cell shape	65	10	8.86	1026	0.39276	0.4675
GO:0006139	nucleobase-containing compound metabolic process	2078	216	283.34	3228	1	0.47246
GO:0035167	larval lymph gland hemopoiesis	43	5	5.86	1828	0.71604	0.482
GO:0007015	actin filament organization	137	27	18.68	276	0.02906	0.4855
GO:0035293	chitin-based larval cuticle pattern formation	19	3	2.59	1168	0.49025	0.4896
GO:0016322	neuron remodeling	51	7	6.95	1333	0.55441	0.49346
GO:0006298	mismatch repair	12	2	1.64	1182	0.50168	0.50116
GO:0007016	cytoskeletal anchoring at plasma membrane	12	2	1.64	1183	0.50168	0.50116
GO:0009065	glutamine family amino acid catabolic process	12	2	1.64	1184	0.50168	0.50116
GO:0018243	protein O-linked glycosylation via threonine	12	2	1.64	1185	0.50168	0.50116
GO:0035234	ectopic germ cell programmed cell death	12	2	1.64	1186	0.50168	0.50116
GO:0046426	negative regulation of JAK-STAT cascade	12	2	1.64	1187	0.50168	0.50116
GO:0050962	detection of light stimulus involved in sensory perception	12	2	1.64	1188	0.50168	0.50116
GO:0038202	TORC1 signaling	38	4	5.18	2060	0.78081	0.50197
GO:0072553	terminal button organization	36	3	4.91	2388	0.88623	0.50235
GO:0044248	cellular catabolic process	744	140	101.45	34	2e-05	0.50429
GO:0001738	morphogenesis of a polarized epithelium	111	9	15.14	2837	0.97453	0.50459
GO:0098655	cation transmembrane transport	149	14	20.32	2713	0.95559	0.5047
GO:1901565	organonitrogen compound catabolic process	413	85	56.31	38	4.1e-05	0.50868
GO:0007494	midgut development	27	4	3.68	1221	0.51267	0.5119
GO:0043902	positive regulation of multi-organism process	43	15	5.86	64	0.00034	0.51614
GO:0030032	lamellipodium assembly	22	7	3	245	0.02282	0.51796
GO:0019732	antifungal humoral response	15	6	2.05	186	0.01058	0.51798
GO:0030730	sequestering of triglyceride	10	5	1.36	146	0.00649	0.51809
GO:0048678	response to axon injury	18	6	2.45	271	0.0274	0.51812
GO:0019439	aromatic compound catabolic process	166	26	22.63	808	0.25139	0.51816
GO:0006911	phagocytosis, engulfment	13	4	1.77	466	0.08933	0.51859
GO:0010669	epithelial structure maintenance	15	4	2.05	543	0.13722	0.51868
GO:0030149	sphingolipid catabolic process	18	4	2.45	747	0.2233	0.51883
GO:0001932	regulation of protein phosphorylation	224	32	30.54	1060	0.41654	0.51884
GO:0042398	cellular modified amino acid biosynthetic process	12	3	1.64	733	0.21815	0.51889
GO:0046662	regulation of oviposition	12	3	1.64	734	0.21815	0.51889
GO:0010001	glial cell differentiation	35	6	4.77	954	0.34066	0.51894
GO:0070972	protein localization to endoplasmic reticulum	21	4	2.86	921	0.31937	0.51897
GO:0042045	epithelial fluid transport	22	4	3	961	0.35226	0.51902
GO:0033500	carbohydrate homeostasis	39	6	5.32	1090	0.4436	0.51913
GO:0034629	cellular protein-containing complex localization	10	2	1.36	1042	0.40469	0.51914
GO:0045477	regulation of nurse cell apoptotic process	10	2	1.36	1043	0.40469	0.51914
GO:1905881	positive regulation of oogenesis	10	2	1.36	1044	0.40469	0.51914
GO:0001710	mesodermal cell fate commitment	11	2	1.5	1130	0.45443	0.51919
GO:0090097	regulation of decapentaplegic signaling pathway	11	2	1.5	1131	0.45443	0.51919
GO:0090276	regulation of peptide hormone secretion	11	2	1.5	1132	0.45443	0.51919
GO:0000393	spliceosomal conformational changes to generate catalytic conformation	5	1	0.68	1226	0.51961	0.51926
GO:0000447	endonucleolytic cleavage in ITS1 to separate SSU-rRNA from 5.8S rRNA and LSU-rRNA from tricistronic ...	5	1	0.68	1227	0.51961	0.51926
GO:0001555	oocyte growth	5	1	0.68	1228	0.51961	0.51926
GO:0001706	endoderm formation	5	1	0.68	1229	0.51961	0.51926
GO:0006085	acetyl-CoA biosynthetic process	5	1	0.68	1230	0.51961	0.51926
GO:0006591	ornithine metabolic process	5	1	0.68	1231	0.51961	0.51926
GO:0006734	NADH metabolic process	5	1	0.68	1232	0.51961	0.51926
GO:0006751	glutathione catabolic process	5	1	0.68	1233	0.51961	0.51926
GO:0007211	octopamine or tyramine signaling pathway	5	1	0.68	1234	0.51961	0.51926
GO:0007313	maternal specification of dorsal/ventral axis, oocyte, soma encoded	5	1	0.68	1235	0.51961	0.51926
GO:0007563	regulation of eclosion	5	1	0.68	1236	0.51961	0.51926
GO:0009301	snRNA transcription	5	1	0.68	1237	0.51961	0.51926
GO:0010955	negative regulation of protein processing	5	1	0.68	1238	0.51961	0.51926
GO:0015868	purine ribonucleotide transport	5	1	0.68	1239	0.51961	0.51926
GO:0016255	attachment of GPI anchor to protein	5	1	0.68	1240	0.51961	0.51926
GO:0016559	peroxisome fission	5	1	0.68	1241	0.51961	0.51926
GO:0016926	protein desumoylation	5	1	0.68	1242	0.51961	0.51926
GO:0019320	hexose catabolic process	5	1	0.68	1243	0.51961	0.51926
GO:0021955	central nervous system neuron axonogenesis	5	1	0.68	1244	0.51961	0.51926
GO:0030037	actin filament reorganization involved in cell cycle	5	1	0.68	1245	0.51961	0.51926
GO:0030104	water homeostasis	5	1	0.68	1246	0.51961	0.51926
GO:0031061	negative regulation of histone methylation	5	1	0.68	1247	0.51961	0.51926
GO:0032837	distributive segregation	5	1	0.68	1248	0.51961	0.51926
GO:0034227	tRNA thio-modification	5	1	0.68	1249	0.51961	0.51926
GO:0035001	dorsal trunk growth, open tracheal system	5	1	0.68	1250	0.51961	0.51926
GO:0035284	brain segmentation	5	1	0.68	1251	0.51961	0.51926
GO:0035310	notum cell fate specification	5	1	0.68	1252	0.51961	0.51926
GO:0035459	cargo loading into vesicle	5	1	0.68	1253	0.51961	0.51926
GO:0035626	juvenile hormone mediated signaling pathway	5	1	0.68	1254	0.51961	0.51926
GO:0038001	paracrine signaling	5	1	0.68	1255	0.51961	0.51926
GO:0038061	NIK/NF-kappaB signaling	5	1	0.68	1256	0.51961	0.51926
GO:0042689	regulation of crystal cell differentiation	5	1	0.68	1257	0.51961	0.51926
GO:0044380	protein localization to cytoskeleton	5	1	0.68	1258	0.51961	0.51926
GO:0045069	regulation of viral genome replication	5	1	0.68	1259	0.51961	0.51926
GO:0045743	positive regulation of fibroblast growth factor receptor signaling pathway	5	1	0.68	1260	0.51961	0.51926
GO:0045850	positive regulation of nurse cell apoptotic process	5	1	0.68	1261	0.51961	0.51926
GO:0045943	positive regulation of transcription by RNA polymerase I	5	1	0.68	1262	0.51961	0.51926
GO:0046477	glycosylceramide catabolic process	5	1	0.68	1263	0.51961	0.51926
GO:0046628	positive regulation of insulin receptor signaling pathway	5	1	0.68	1264	0.51961	0.51926
GO:0046663	dorsal closure, leading edge cell differentiation	5	1	0.68	1265	0.51961	0.51926
GO:0048525	negative regulation of viral process	5	1	0.68	1266	0.51961	0.51926
GO:0048644	muscle organ morphogenesis	5	1	0.68	1267	0.51961	0.51926
GO:0048730	epidermis morphogenesis	5	1	0.68	1268	0.51961	0.51926
GO:0051055	negative regulation of lipid biosynthetic process	5	1	0.68	1269	0.51961	0.51926
GO:0051289	protein homotetramerization	5	1	0.68	1270	0.51961	0.51926
GO:0051503	adenine nucleotide transport	5	1	0.68	1271	0.51961	0.51926
GO:0051569	regulation of histone H3-K4 methylation	5	1	0.68	1272	0.51961	0.51926
GO:0051601	exocyst localization	5	1	0.68	1273	0.51961	0.51926
GO:0060158	phospholipase C-activating dopamine receptor signaling pathway	5	1	0.68	1274	0.51961	0.51926
GO:0060269	centripetally migrating follicle cell migration	5	1	0.68	1275	0.51961	0.51926
GO:0060395	SMAD protein signal transduction	5	1	0.68	1276	0.51961	0.51926
GO:0061060	negative regulation of peptidoglycan recognition protein signaling pathway	5	1	0.68	1277	0.51961	0.51926
GO:0061088	regulation of sequestering of zinc ion	5	1	0.68	1278	0.51961	0.51926
GO:0061541	rhabdomere morphogenesis	5	1	0.68	1279	0.51961	0.51926
GO:0061864	basement membrane constituent secretion	5	1	0.68	1280	0.51961	0.51926
GO:0070936	protein K48-linked ubiquitination	5	1	0.68	1281	0.51961	0.51926
GO:0071046	nuclear polyadenylation-dependent ncRNA catabolic process	5	1	0.68	1282	0.51961	0.51926
GO:0071051	polyadenylation-dependent snoRNA 3'-end processing	5	1	0.68	1283	0.51961	0.51926
GO:0071907	determination of digestive tract left/right asymmetry	5	1	0.68	1284	0.51961	0.51926
GO:0090224	regulation of spindle organization	5	1	0.68	1285	0.51961	0.51926
GO:0090382	phagosome maturation	5	1	0.68	1286	0.51961	0.51926
GO:0090646	mitochondrial tRNA processing	5	1	0.68	1287	0.51961	0.51926
GO:0097327	response to antineoplastic agent	5	1	0.68	1288	0.51961	0.51926
GO:0097384	cellular lipid biosynthetic process	5	1	0.68	1289	0.51961	0.51926
GO:1902969	mitotic DNA replication	5	1	0.68	1290	0.51961	0.51926
GO:1904801	positive regulation of neuron remodeling	5	1	0.68	1291	0.51961	0.51926
GO:1990748	cellular detoxification	5	1	0.68	1292	0.51961	0.51926
GO:2000677	regulation of transcription regulatory region DNA binding	5	1	0.68	1293	0.51961	0.51926
GO:2001022	positive regulation of response to DNA damage stimulus	5	1	0.68	1294	0.51961	0.51926
GO:0035162	embryonic hemopoiesis	23	3	3.14	1532	0.62479	0.51942
GO:0045185	maintenance of protein location	34	4	4.64	1811	0.7	0.51959
GO:0051651	maintenance of location in cell	34	4	4.64	1812	0.7	0.51959
GO:2000647	negative regulation of stem cell proliferation	37	4	5.05	1982	0.7624	0.51973
GO:0009156	ribonucleoside monophosphate biosynthetic process	53	6	7.23	1948	0.74765	0.5198
GO:0060968	regulation of gene silencing	71	8	9.68	2034	0.77021	0.51996
GO:0000165	MAPK cascade	159	20	21.68	1725	0.68731	0.51996
GO:0007298	border follicle cell migration	116	16	15.82	1302	0.52157	0.51998
GO:0048865	stem cell fate commitment	29	2	3.95	2529	0.92089	0.52005
GO:0046488	phosphatidylinositol metabolic process	66	7	9	2144	0.81408	0.52007
GO:0007612	learning	61	6	8.32	2301	0.8564	0.52018
GO:0034249	negative regulation of cellular amide metabolic process	80	7	10.91	2594	0.93309	0.52075
GO:0006869	lipid transport	62	15	8.45	215	0.01729	0.52131
GO:0030705	cytoskeleton-dependent intracellular transport	65	3	8.86	3024	0.99552	0.52143
GO:0009950	dorsal/ventral axis specification	66	12	9	651	0.18128	0.52368
GO:1902531	regulation of intracellular signal transduction	351	36	47.86	2870	0.97855	0.52369
GO:0006814	sodium ion transport	33	4	4.5	1711	0.67675	0.52601
GO:0001933	negative regulation of protein phosphorylation	65	16	8.86	191	0.01205	0.54194
GO:0009108	coenzyme biosynthetic process	77	17	10.5	274	0.02806	0.54228
GO:0030490	maturation of SSU-rRNA	46	9	6.27	626	0.16672	0.54433
GO:0008593	regulation of Notch signaling pathway	99	10	13.5	2384	0.88423	0.5448
GO:0016325	oocyte microtubule cytoskeleton organization	31	6	4.23	760	0.24099	0.54484
GO:0032880	regulation of protein localization	83	13	11.32	952	0.33992	0.54488
GO:0051302	regulation of cell division	24	4	3.27	1065	0.41784	0.5454
GO:0008594	photoreceptor cell morphogenesis	18	3	2.45	1109	0.45304	0.5455
GO:0035065	regulation of histone acetylation	13	2	1.77	1325	0.5462	0.54567
GO:0046835	carbohydrate phosphorylation	13	2	1.77	1326	0.5462	0.54567
GO:0051607	defense response to virus	39	9	5.32	422	0.07498	0.55759
GO:0033554	cellular response to stress	525	72	71.58	1176	0.49892	0.55974
GO:0000413	protein peptidyl-prolyl isomerization	21	3	2.86	1340	0.56063	0.55996
GO:0000915	actomyosin contractile ring assembly	21	3	2.86	1341	0.56063	0.55996
GO:0033627	cell adhesion mediated by integrin	21	3	2.86	1342	0.56063	0.55996
GO:0045879	negative regulation of smoothened signaling pathway	21	3	2.86	1343	0.56063	0.55996
GO:0046580	negative regulation of Ras protein signal transduction	21	3	2.86	1344	0.56063	0.55996
GO:0007391	dorsal closure	100	15	13.64	1019	0.38748	0.56083
GO:0008354	germ cell migration	40	4	5.45	2145	0.81422	0.56103
GO:0009887	animal organ morphogenesis	678	60	92.45	3193	0.99997	0.56445
GO:0008582	regulation of synaptic growth at neuromuscular junction	98	20	13.36	321	0.03979	0.56579
GO:0030307	positive regulation of cell growth	42	7	5.73	957	0.3461	0.57002
GO:0051130	positive regulation of cellular component organization	245	45	33.41	240	0.02091	0.58049
GO:0006959	humoral immune response	94	24	12.82	89	0.00142	0.58073
GO:0022416	chaeta development	74	9	10.09	1788	0.69538	0.58124
GO:0002684	positive regulation of immune system process	78	19	10.64	160	0.00739	0.58178
GO:0043455	regulation of secondary metabolic process	13	8	1.77	42	7.9e-05	0.58259
GO:0008592	regulation of Toll signaling pathway	23	9	3.14	108	0.00214	0.58272
GO:0051493	regulation of cytoskeleton organization	138	23	18.82	637	0.17696	0.5833
GO:0006865	amino acid transport	40	7	5.45	907	0.29968	0.58429
GO:0043094	cellular metabolic compound salvage	20	4	2.73	867	0.28673	0.58439
GO:0006109	regulation of carbohydrate metabolic process	24	4	3.27	1066	0.41784	0.58459
GO:0006084	acetyl-CoA metabolic process	11	2	1.5	1133	0.45443	0.58467
GO:0016236	macroautophagy	78	11	10.64	1205	0.50199	0.58472
GO:0006767	water-soluble vitamin metabolic process	12	2	1.64	1189	0.50168	0.58472
GO:0045676	regulation of R7 cell differentiation	12	2	1.64	1190	0.50168	0.58472
GO:0048846	axon extension involved in axon guidance	12	2	1.64	1191	0.50168	0.58472
GO:0000972	transcription-dependent tethering of RNA polymerase II gene DNA at nuclear periphery	6	1	0.82	1367	0.58515	0.58479
GO:0006012	galactose metabolic process	6	1	0.82	1368	0.58515	0.58479
GO:0006047	UDP-N-acetylglucosamine metabolic process	6	1	0.82	1369	0.58515	0.58479
GO:0006264	mitochondrial DNA replication	6	1	0.82	1370	0.58515	0.58479
GO:0006273	lagging strand elongation	6	1	0.82	1371	0.58515	0.58479
GO:0006384	transcription initiation from RNA polymerase III promoter	6	1	0.82	1372	0.58515	0.58479
GO:0006560	proline metabolic process	6	1	0.82	1373	0.58515	0.58479
GO:0007312	oocyte nucleus migration involved in oocyte dorsal/ventral axis specification	6	1	0.82	1374	0.58515	0.58479
GO:0007425	epithelial cell fate determination, open tracheal system	6	1	0.82	1375	0.58515	0.58479
GO:0007451	dorsal/ventral lineage restriction, imaginal disc	6	1	0.82	1376	0.58515	0.58479
GO:0007473	wing disc proximal/distal pattern formation	6	1	0.82	1377	0.58515	0.58479
GO:0007487	analia development	6	1	0.82	1378	0.58515	0.58479
GO:0007501	mesodermal cell fate specification	6	1	0.82	1379	0.58515	0.58479
GO:0008203	cholesterol metabolic process	6	1	0.82	1380	0.58515	0.58479
GO:0009303	rRNA transcription	6	1	0.82	1381	0.58515	0.58479
GO:0009589	detection of UV	6	1	0.82	1382	0.58515	0.58479
GO:0010862	positive regulation of pathway-restricted SMAD protein phosphorylation	6	1	0.82	1383	0.58515	0.58479
GO:0015014	heparan sulfate proteoglycan biosynthetic process, polysaccharide chain biosynthetic process	6	1	0.82	1384	0.58515	0.58479
GO:0015909	long-chain fatty acid transport	6	1	0.82	1385	0.58515	0.58479
GO:0015937	coenzyme A biosynthetic process	6	1	0.82	1386	0.58515	0.58479
GO:0016078	tRNA catabolic process	6	1	0.82	1387	0.58515	0.58479
GO:0016267	O-glycan processing, core 1	6	1	0.82	1388	0.58515	0.58479
GO:0016558	protein import into peroxisome matrix	6	1	0.82	1389	0.58515	0.58479
GO:0016601	Rac protein signal transduction	6	1	0.82	1390	0.58515	0.58479
GO:0018344	protein geranylgeranylation	6	1	0.82	1391	0.58515	0.58479
GO:0019101	female somatic sex determination	6	1	0.82	1392	0.58515	0.58479
GO:0019509	L-methionine salvage from methylthioadenosine	6	1	0.82	1393	0.58515	0.58479
GO:0019919	peptidyl-arginine methylation, to asymmetrical-dimethyl arginine	6	1	0.82	1394	0.58515	0.58479
GO:0030335	positive regulation of cell migration	6	1	0.82	1395	0.58515	0.58479
GO:0030382	sperm mitochondrion organization	6	1	0.82	1396	0.58515	0.58479
GO:0030513	positive regulation of BMP signaling pathway	6	1	0.82	1397	0.58515	0.58479
GO:0030728	ovulation	6	1	0.82	1398	0.58515	0.58479
GO:0030950	establishment or maintenance of actin cytoskeleton polarity	6	1	0.82	1399	0.58515	0.58479
GO:0032511	late endosome to vacuole transport via multivesicular body sorting pathway	6	1	0.82	1400	0.58515	0.58479
GO:0032924	activin receptor signaling pathway	6	1	0.82	1401	0.58515	0.58479
GO:0032933	SREBP signaling pathway	6	1	0.82	1402	0.58515	0.58479
GO:0033559	unsaturated fatty acid metabolic process	6	1	0.82	1403	0.58515	0.58479
GO:0034453	microtubule anchoring	6	1	0.82	1404	0.58515	0.58479
GO:0034551	mitochondrial respiratory chain complex III assembly	6	1	0.82	1405	0.58515	0.58479
GO:0035207	negative regulation of hemocyte proliferation	6	1	0.82	1406	0.58515	0.58479
GO:0038203	TORC2 signaling	6	1	0.82	1407	0.58515	0.58479
GO:0040031	snRNA modification	6	1	0.82	1408	0.58515	0.58479
GO:0042364	water-soluble vitamin biosynthetic process	6	1	0.82	1409	0.58515	0.58479
GO:0042694	muscle cell fate specification	6	1	0.82	1410	0.58515	0.58479
GO:0043388	positive regulation of DNA binding	6	1	0.82	1411	0.58515	0.58479
GO:0043392	negative regulation of DNA binding	6	1	0.82	1412	0.58515	0.58479
GO:0043928	exonucleolytic nuclear-transcribed mRNA catabolic process involved in deadenylation-dependent decay	6	1	0.82	1413	0.58515	0.58479
GO:0045463	R8 cell development	6	1	0.82	1414	0.58515	0.58479
GO:0045678	positive regulation of R7 cell differentiation	6	1	0.82	1415	0.58515	0.58479
GO:0046665	amnioserosa maintenance	6	1	0.82	1416	0.58515	0.58479
GO:0046692	sperm competition	6	1	0.82	1417	0.58515	0.58479
GO:0046701	insecticide catabolic process	6	1	0.82	1418	0.58515	0.58479
GO:0048562	embryonic organ morphogenesis	6	1	0.82	1419	0.58515	0.58479
GO:0048841	regulation of axon extension involved in axon guidance	6	1	0.82	1420	0.58515	0.58479
GO:0050848	regulation of calcium-mediated signaling	6	1	0.82	1421	0.58515	0.58479
GO:0051036	regulation of endosome size	6	1	0.82	1422	0.58515	0.58479
GO:0055078	sodium ion homeostasis	6	1	0.82	1423	0.58515	0.58479
GO:0055093	response to hyperoxia	6	1	0.82	1424	0.58515	0.58479
GO:0060912	cardiac cell fate specification	6	1	0.82	1425	0.58515	0.58479
GO:0061085	regulation of histone H3-K27 methylation	6	1	0.82	1426	0.58515	0.58479
GO:0061099	negative regulation of protein tyrosine kinase activity	6	1	0.82	1427	0.58515	0.58479
GO:0061883	clathrin-dependent endocytosis involved in vitellogenesis	6	1	0.82	1428	0.58515	0.58479
GO:0070922	small RNA loading onto RISC	6	1	0.82	1429	0.58515	0.58479
GO:0071329	cellular response to sucrose stimulus	6	1	0.82	1430	0.58515	0.58479
GO:0090098	positive regulation of decapentaplegic signaling pathway	6	1	0.82	1431	0.58515	0.58479
GO:0090141	positive regulation of mitochondrial fission	6	1	0.82	1432	0.58515	0.58479
GO:0090251	protein localization involved in establishment of planar polarity	6	1	0.82	1433	0.58515	0.58479
GO:0090278	negative regulation of peptide hormone secretion	6	1	0.82	1434	0.58515	0.58479
GO:0097320	plasma membrane tubulation	6	1	0.82	1435	0.58515	0.58479
GO:0098725	symmetric cell division	6	1	0.82	1436	0.58515	0.58479
GO:0098927	vesicle-mediated transport between endosomal compartments	6	1	0.82	1437	0.58515	0.58479
GO:1900182	positive regulation of protein localization to nucleus	6	1	0.82	1438	0.58515	0.58479
GO:1901070	guanosine-containing compound biosynthetic process	6	1	0.82	1439	0.58515	0.58479
GO:1902410	mitotic cytokinetic process	6	1	0.82	1440	0.58515	0.58479
GO:1902475	L-alpha-amino acid transmembrane transport	6	1	0.82	1441	0.58515	0.58479
GO:1903078	positive regulation of protein localization to plasma membrane	6	1	0.82	1442	0.58515	0.58479
GO:1903146	regulation of autophagy of mitochondrion	6	1	0.82	1443	0.58515	0.58479
GO:2000105	positive regulation of DNA-dependent DNA replication	6	1	0.82	1444	0.58515	0.58479
GO:2000252	negative regulation of feeding behavior	6	1	0.82	1445	0.58515	0.58479
GO:2000300	regulation of synaptic vesicle exocytosis	6	1	0.82	1446	0.58515	0.58479
GO:2000370	positive regulation of clathrin-dependent endocytosis	6	1	0.82	1447	0.58515	0.58479
GO:2000637	positive regulation of gene silencing by miRNA	6	1	0.82	1448	0.58515	0.58479
GO:0006900	vesicle budding from membrane	17	2	2.32	1792	0.69549	0.58497
GO:0090407	organophosphate biosynthetic process	191	30	26.04	751	0.2269	0.58519
GO:0030716	oocyte fate determination	33	3	4.5	2262	0.847	0.5854
GO:0017145	stem cell division	91	10	12.41	2143	0.81241	0.58573
GO:0000086	G2/M transition of mitotic cell cycle	34	2	4.64	2717	0.95671	0.58581
GO:0016334	establishment or maintenance of polarity of follicular epithelium	26	6	3.55	537	0.13309	0.58605
GO:0001941	postsynaptic membrane organization	14	2	1.91	1477	0.58786	0.58732
GO:0006783	heme biosynthetic process	14	2	1.91	1478	0.58786	0.58732
GO:0007527	adult somatic muscle development	14	2	1.91	1479	0.58786	0.58732
GO:0016572	histone phosphorylation	14	2	1.91	1480	0.58786	0.58732
GO:0030308	negative regulation of cell growth	14	2	1.91	1481	0.58786	0.58732
GO:0036098	male germ-line stem cell population maintenance	14	2	1.91	1482	0.58786	0.58732
GO:0046173	polyol biosynthetic process	14	2	1.91	1483	0.58786	0.58732
GO:0061355	Wnt protein secretion	14	2	1.91	1484	0.58786	0.58732
GO:2000134	negative regulation of G1/S transition of mitotic cell cycle	14	2	1.91	1485	0.58786	0.58732
GO:0032259	methylation	117	8	15.95	2996	0.99347	0.58777
GO:0060627	regulation of vesicle-mediated transport	117	14	15.95	1938	0.74135	0.58843
GO:0008033	tRNA processing	76	8	10.36	2227	0.83151	0.58865
GO:0010941	regulation of cell death	259	24	35.32	2937	0.98837	0.58907
GO:0009967	positive regulation of signal transduction	313	30	42.68	2945	0.98932	0.58961
GO:0051321	meiotic cell cycle	197	13	26.86	3135	0.9995	0.58998
GO:0002168	instar larval development	62	10	8.45	935	0.33505	0.59182
GO:0048592	eye morphogenesis	284	20	38.72	3170	0.99987	0.59184
GO:0006414	translational elongation	29	5	3.95	987	0.36111	0.59216
GO:0010506	regulation of autophagy	92	14	12.54	1001	0.37262	0.59776
GO:0042052	rhabdomere development	42	6	5.73	1224	0.51872	0.59869
GO:0007286	spermatid development	67	5	9.14	2747	0.9609	0.60211
GO:0007420	brain development	102	9	13.91	2672	0.949	0.60273
GO:0017144	drug metabolic process	301	38	41.04	1838	0.72381	0.60761
GO:0006406	mRNA export from nucleus	34	4	4.64	1813	0.7	0.62446
GO:0021782	glial cell development	30	5	4.09	1021	0.38983	0.62556
GO:0042059	negative regulation of epidermal growth factor receptor signaling pathway	31	4	4.23	1535	0.6266	0.62584
GO:0007204	positive regulation of cytosolic calcium ion concentration	15	2	2.05	1542	0.62661	0.62607
GO:0031644	regulation of neurological system process	15	2	2.05	1543	0.62661	0.62607
GO:0035072	ecdysone-mediated induction of salivary gland cell autophagic cell death	15	2	2.05	1544	0.62661	0.62607
GO:0046627	negative regulation of insulin receptor signaling pathway	15	2	2.05	1545	0.62661	0.62607
GO:0006906	vesicle fusion	67	7	9.14	2182	0.82614	0.62731
GO:0035151	regulation of tube size, open tracheal system	49	4	6.68	2505	0.9167	0.62749
GO:0006749	glutathione metabolic process	44	6	6	1352	0.56652	0.62867
GO:0007265	Ras protein signal transduction	190	18	25.91	2799	0.96897	0.63036
GO:0006812	cation transport	232	22	31.63	2875	0.97953	0.63133
GO:0006397	mRNA processing	288	28	39.27	2904	0.98358	0.63226
GO:0071702	organic substance transport	655	98	89.31	624	0.16497	0.63792
GO:0043648	dicarboxylic acid metabolic process	26	8	3.55	220	0.01883	0.63977
GO:0046328	regulation of JNK cascade	52	10	7.09	618	0.16299	0.64034
GO:0010332	response to gamma radiation	19	5	2.59	490	0.10589	0.64053
GO:0032535	regulation of cellular component size	159	24	21.68	926	0.32746	0.64054
GO:0006898	receptor-mediated endocytosis	34	7	4.64	634	0.1723	0.64054
GO:0006835	dicarboxylic acid transport	12	3	1.64	735	0.21815	0.64091
GO:0045840	positive regulation of mitotic nuclear division	14	3	1.91	882	0.29625	0.64101
GO:0046622	positive regulation of organ growth	18	3	2.45	1110	0.45304	0.64121
GO:0046839	phospholipid dephosphorylation	18	3	2.45	1111	0.45304	0.64121
GO:0097237	cellular response to toxic substance	12	2	1.64	1192	0.50168	0.64128
GO:0006121	mitochondrial electron transport, succinate to ubiquinone	7	1	0.95	1567	0.64176	0.64139
GO:0006265	DNA topological change	7	1	0.95	1568	0.64176	0.64139
GO:0006348	chromatin silencing at telomere	7	1	0.95	1569	0.64176	0.64139
GO:0006388	tRNA splicing, via endonucleolytic cleavage and ligation	7	1	0.95	1570	0.64176	0.64139
GO:0006398	mRNA 3'-end processing by stem-loop binding and cleavage	7	1	0.95	1571	0.64176	0.64139
GO:0006415	translational termination	7	1	0.95	1572	0.64176	0.64139
GO:0006541	glutamine metabolic process	7	1	0.95	1573	0.64176	0.64139
GO:0006570	tyrosine metabolic process	7	1	0.95	1574	0.64176	0.64139
GO:0006801	superoxide metabolic process	7	1	0.95	1575	0.64176	0.64139
GO:0007191	adenylate cyclase-activating dopamine receptor signaling pathway	7	1	0.95	1576	0.64176	0.64139
GO:0007377	germ-band extension	7	1	0.95	1577	0.64176	0.64139
GO:0007415	defasciculation of motor neuron axon	7	1	0.95	1578	0.64176	0.64139
GO:0007503	fat body development	7	1	0.95	1579	0.64176	0.64139
GO:0007516	hemocyte development	7	1	0.95	1580	0.64176	0.64139
GO:0009147	pyrimidine nucleoside triphosphate metabolic process	7	1	0.95	1581	0.64176	0.64139
GO:0009395	phospholipid catabolic process	7	1	0.95	1582	0.64176	0.64139
GO:0010771	negative regulation of cell morphogenesis involved in differentiation	7	1	0.95	1583	0.64176	0.64139
GO:0016057	regulation of membrane potential in photoreceptor cell	7	1	0.95	1584	0.64176	0.64139
GO:0016114	terpenoid biosynthetic process	7	1	0.95	1585	0.64176	0.64139
GO:0016925	protein sumoylation	7	1	0.95	1586	0.64176	0.64139
GO:0021556	central nervous system formation	7	1	0.95	1587	0.64176	0.64139
GO:0030856	regulation of epithelial cell differentiation	7	1	0.95	1588	0.64176	0.64139
GO:0031053	primary miRNA processing	7	1	0.95	1589	0.64176	0.64139
GO:0032413	negative regulation of ion transmembrane transporter activity	7	1	0.95	1590	0.64176	0.64139
GO:0032875	regulation of DNA endoreduplication	7	1	0.95	1591	0.64176	0.64139
GO:0034126	positive regulation of MyD88-dependent toll-like receptor signaling pathway	7	1	0.95	1592	0.64176	0.64139
GO:0034204	lipid translocation	7	1	0.95	1593	0.64176	0.64139
GO:0034475	U4 snRNA 3'-end processing	7	1	0.95	1594	0.64176	0.64139
GO:0034969	histone arginine methylation	7	1	0.95	1595	0.64176	0.64139
GO:0035176	social behavior	7	1	0.95	1596	0.64176	0.64139
GO:0035331	negative regulation of hippo signaling	7	1	0.95	1597	0.64176	0.64139
GO:0042381	hemolymph coagulation	7	1	0.95	1598	0.64176	0.64139
GO:0042542	response to hydrogen peroxide	7	1	0.95	1599	0.64176	0.64139
GO:0042744	hydrogen peroxide catabolic process	7	1	0.95	1600	0.64176	0.64139
GO:0045199	maintenance of epithelial cell apical/basal polarity	7	1	0.95	1601	0.64176	0.64139
GO:0045313	rhabdomere membrane biogenesis	7	1	0.95	1602	0.64176	0.64139
GO:0045500	sevenless signaling pathway	7	1	0.95	1603	0.64176	0.64139
GO:0046008	regulation of female receptivity, post-mating	7	1	0.95	1604	0.64176	0.64139
GO:0046039	GTP metabolic process	7	1	0.95	1605	0.64176	0.64139
GO:0046513	ceramide biosynthetic process	7	1	0.95	1606	0.64176	0.64139
GO:0046680	response to DDT	7	1	0.95	1607	0.64176	0.64139
GO:0048133	male germ-line stem cell asymmetric division	7	1	0.95	1608	0.64176	0.64139
GO:0048312	intracellular distribution of mitochondria	7	1	0.95	1609	0.64176	0.64139
GO:0048567	ectodermal digestive tract morphogenesis	7	1	0.95	1610	0.64176	0.64139
GO:0051208	sequestering of calcium ion	7	1	0.95	1611	0.64176	0.64139
GO:0051926	negative regulation of calcium ion transport	7	1	0.95	1612	0.64176	0.64139
GO:0055083	monovalent inorganic anion homeostasis	7	1	0.95	1613	0.64176	0.64139
GO:0070129	regulation of mitochondrial translation	7	1	0.95	1614	0.64176	0.64139
GO:0071219	cellular response to molecule of bacterial origin	7	1	0.95	1615	0.64176	0.64139
GO:0097120	receptor localization to synapse	7	1	0.95	1616	0.64176	0.64139
GO:1901019	regulation of calcium ion transmembrane transporter activity	7	1	0.95	1617	0.64176	0.64139
GO:1901409	positive regulation of phosphorylation of RNA polymerase II C-terminal domain	7	1	0.95	1618	0.64176	0.64139
GO:1903828	negative regulation of cellular protein localization	7	1	0.95	1619	0.64176	0.64139
GO:1904063	negative regulation of cation transmembrane transport	7	1	0.95	1620	0.64176	0.64139
GO:2000104	negative regulation of DNA-dependent DNA replication	7	1	0.95	1621	0.64176	0.64139
GO:2001242	regulation of intrinsic apoptotic signaling pathway	7	1	0.95	1622	0.64176	0.64139
GO:0050769	positive regulation of neurogenesis	66	9	9	1334	0.55451	0.64141
GO:0006893	Golgi to plasma membrane transport	23	3	3.14	1533	0.62479	0.64146
GO:0050878	regulation of body fluid levels	16	2	2.18	1679	0.66246	0.64148
GO:0030048	actin filament-based movement	27	3	3.68	1865	0.73281	0.64166
GO:0051090	regulation of DNA binding transcription factor activity	22	2	3	2161	0.82255	0.64178
GO:0019933	cAMP-mediated signaling	30	2	4.09	2580	0.92977	0.64218
GO:0042749	regulation of circadian sleep/wake cycle	38	3	5.18	2478	0.90713	0.64221
GO:0002065	columnar/cuboidal epithelial cell differentiation	281	33	38.31	2269	0.84875	0.64341
GO:0006091	generation of precursor metabolites and energy	160	14	21.82	2871	0.97875	0.64431
GO:0007051	spindle organization	113	5	15.41	3147	0.9997	0.64525
GO:0046034	ATP metabolic process	111	4	15.14	3181	0.99992	0.64551
GO:0070588	calcium ion transmembrane transport	31	4	4.23	1536	0.6266	0.65367
GO:0035096	larval midgut cell programmed cell death	24	3	3.27	1671	0.65435	0.6537
GO:0008284	positive regulation of cell proliferation	62	7	8.45	1981	0.7593	0.65445
GO:0030182	neuron differentiation	678	58	92.45	3201	0.99999	0.65493
GO:0044271	cellular nitrogen compound biosynthetic process	1656	188	225.8	3118	0.99914	0.65844
GO:0006644	phospholipid metabolic process	125	22	17.04	530	0.12262	0.65916
GO:0044272	sulfur compound biosynthetic process	35	9	4.77	325	0.0409	0.65959
GO:0015893	drug transport	25	5	3.41	804	0.24848	0.66099
GO:0010038	response to metal ion	34	6	4.64	916	0.31513	0.66111
GO:0000028	ribosomal small subunit assembly	16	2	2.18	1680	0.66246	0.66193
GO:0007040	lysosome organization	16	2	2.18	1681	0.66246	0.66193
GO:0007479	leg disc proximal/distal pattern formation	16	2	2.18	1682	0.66246	0.66193
GO:0008630	intrinsic apoptotic signaling pathway in response to DNA damage	16	2	2.18	1683	0.66246	0.66193
GO:0016126	sterol biosynthetic process	16	2	2.18	1684	0.66246	0.66193
GO:0016239	positive regulation of macroautophagy	16	2	2.18	1685	0.66246	0.66193
GO:0016360	sensory organ precursor cell fate determination	16	2	2.18	1686	0.66246	0.66193
GO:0035025	positive regulation of Rho protein signal transduction	16	2	2.18	1687	0.66246	0.66193
GO:0035073	pupariation	16	2	2.18	1688	0.66246	0.66193
GO:0043001	Golgi to plasma membrane protein transport	16	2	2.18	1689	0.66246	0.66193
GO:0043052	thermotaxis	16	2	2.18	1690	0.66246	0.66193
GO:0048803	imaginal disc-derived male genitalia morphogenesis	16	2	2.18	1691	0.66246	0.66193
GO:0051642	centrosome localization	16	2	2.18	1692	0.66246	0.66193
GO:0006402	mRNA catabolic process	73	7	9.95	2387	0.88606	0.66341
GO:0043436	oxoacid metabolic process	346	99	47.18	2	6.2e-14	0.6658
GO:0007059	chromosome segregation	173	13	23.59	3037	0.9961	0.66752
GO:0006974	cellular response to DNA damage stimulus	197	15	26.86	3064	0.99729	0.66821
GO:0007552	metamorphosis	419	40	57.13	3046	0.99637	0.67128
GO:0045475	locomotor rhythm	65	9	8.86	1312	0.5351	0.67382
GO:0007423	sensory organ development	427	33	58.22	3192	0.99997	0.6757
GO:0043603	cellular amide metabolic process	566	97	77.18	166	0.00827	0.68246
GO:0044089	positive regulation of cellular component biogenesis	125	26	17.04	213	0.01684	0.68695
GO:0042255	ribosome assembly	44	10	6	403	0.06826	0.6888
GO:0007300	ovarian nurse cell to oocyte transport	30	5	4.09	1022	0.38983	0.68993
GO:0009649	entrainment of circadian clock	18	3	2.45	1112	0.45304	0.69006
GO:0009744	response to sucrose	14	2	1.91	1486	0.58786	0.69022
GO:0008543	fibroblast growth factor receptor signaling pathway	15	2	2.05	1546	0.62661	0.69027
GO:0000712	resolution of meiotic recombination intermediates	8	1	1.09	1727	0.69065	0.69029
GO:0001731	formation of translation preinitiation complex	8	1	1.09	1728	0.69065	0.69029
GO:0001742	oenocyte differentiation	8	1	1.09	1729	0.69065	0.69029
GO:0006304	DNA modification	8	1	1.09	1730	0.69065	0.69029
GO:0006509	membrane protein ectodomain proteolysis	8	1	1.09	1731	0.69065	0.69029
GO:0006688	glycosphingolipid biosynthetic process	8	1	1.09	1732	0.69065	0.69029
GO:0006896	Golgi to vacuole transport	8	1	1.09	1733	0.69065	0.69029
GO:0007301	female germline ring canal formation	8	1	1.09	1734	0.69065	0.69029
GO:0007486	imaginal disc-derived female genitalia development	8	1	1.09	1735	0.69065	0.69029
GO:0007539	primary sex determination, soma	8	1	1.09	1736	0.69065	0.69029
GO:0008637	apoptotic mitochondrial changes	8	1	1.09	1737	0.69065	0.69029
GO:0009631	cold acclimation	8	1	1.09	1738	0.69065	0.69029
GO:0016330	second mitotic wave involved in compound eye morphogenesis	8	1	1.09	1739	0.69065	0.69029
GO:0016578	histone deubiquitination	8	1	1.09	1740	0.69065	0.69029
GO:0031453	positive regulation of heterochromatin assembly	8	1	1.09	1741	0.69065	0.69029
GO:0032387	negative regulation of intracellular transport	8	1	1.09	1742	0.69065	0.69029
GO:0034427	nuclear-transcribed mRNA catabolic process, exonucleolytic, 3'-5'	8	1	1.09	1743	0.69065	0.69029
[truncated: 2,858 more rows]

## Sheet: male_down
GO.ID	Term	Annotated	Significant	Expected	Rank in Fisher.classic	Fisher.classic	Fisher.weight01
[truncated: 3,957 more rows]

[truncated: 8 more sheets: concordant_up, concordant_down, female_specific_up, female_specific_down, male_specific_up, male_specific_down, antagonistic_f_up_m_dn, antagonistic_f_dn_m_up]
