# Supplementary material for: Rapid sex-specific adaptation to high temperature in Drosophila
Source: eLife. 2020 Feb 21;9:e53237. doi: 10.7554/eLife.53237 (PMC7034977; doi:10.7554/eLife.53237)
Supplement: Supplementary file 3. — In this file, we reported the results of Fisher’s exact test for enrichment of genes highly expressed in each tissue among the genes of interest and the list of genes that are highly expressed in each tissue. [file elife-53237-supp3.xlsx]

## Sheet: legend
Supplementary File 3. Enrichment analysis of genes highly expressed in each tissue among the genes of interest
abbreviation	tissue name	# of genes highly expressed
Br	brain	1889
Hd	head	1855
Cr	crop	1412
Mg	mid gut	1334
Hg	hind gut	1364
Tb	malphigion tubule	1311
Tg	thoracicoabdomen ganglion	1854
Cs	carcass	1595
Sg	salivary gland	1761
Fb	fat body	1345
Ey	eye	1701
Hr	heart	1312

## Sheet: Fisher's exact test
	female up-regulation		female down-regulation		male up-regulation		male down-regulation		female specific up-regulation		female specific down-regulation		male specific up-regulation		male specific down-regulation		concordant up-regulation		concordant down-regulation		antagonistic (f/m)		antagonistic (m/f)
	odds ratio	padj	odds ratio	padj	odds ratio	padj	odds ratio	padj	odds ratio	padj	odds ratio	padj	odds ratio	padj	odds ratio	padj	odds ratio	padj	odds ratio	padj	odds ratio	padj	odds ratio	padj
Br	0.435609	1	1.00104	0.983987	0.482223	1	1.65094	2.0668e-10	0.469064	1	0.931961	1	0.558836	1	1.89309	6.44086e-11	0.379505	1	1.48331	0.0093324	0.827998	1	0.698367	1
Hd	0.76189	1	0.9776	1	1.30064	0.000728996	1.18357	0.0509754	0.673517	1	0.909855	1	1.29862	0.0127069	1.30425	0.0126276	1.25322	0.0740976	1.13409	0.47659	0.77157	1	1.20683	0.451556
Cr	0.490016	1	1.3242	0.000308184	1.3595	0.000323334	1.00515	0.974585	0.488339	1	1.16434	0.102543	1.64767	5.4773e-06	1.02125	0.902814	0.729676	1	1.36998	0.0702994	0.382522	1	2.09503	0.000466957
Mg	0.747423	1	0.930064	1	1.8248	2.12143e-13	0.715997	1	0.61057	1	0.893235	1	1.89926	2.83566e-09	0.735268	1	1.67636	7.7363e-05	0.967751	1	0.322294	1	1.18125	0.550329
Hg	0.5996	1	1.35794	9.30095e-05	1.49889	1.80989e-06	0.902437	1	0.539382	1	1.26359	0.0100688	1.6393	8.81214e-06	0.865463	1	1.11579	0.482127	1.33184	0.107783	0.398493	1	1.6952	0.0194474
Tb	0.663565	1	1.59718	1.12399e-09	1.95859	1.39849e-16	0.634785	1	0.560736	1	1.44712	3.18188e-05	1.83216	3.25391e-08	0.55527	1	1.46357	0.00557109	1.13941	0.517241	0.243	1	3.05987	2.03587e-08
Tg	0.471926	1	1.07296	0.373756	0.580331	1	1.55538	3.25391e-08	0.484815	1	0.974856	1	0.597815	1	1.71699	5.55532e-08	0.49629	1	1.4922	0.0087599	0.847836	1	0.990026	1
Cs	0.711947	1	1.21486	0.0100688	2.23717	1.43095e-27	1.28166	0.00556316	0.527514	1	0.905979	1	2.29954	1.96381e-17	1.10075	0.45934	1.66495	3.18188e-05	1.87674	3.05771e-05	0.886071	1	2.33669	1.99204e-05
Sg	0.761524	1	1.17696	0.026159	1.12477	0.162809	0.969343	1	0.731192	1	1.06812	0.47659	1.05973	0.627583	0.913361	1	1.00782	0.974585	1.23854	0.201219	0.745352	1	1.70682	0.00998177
Fb	0.894605	1	1.26605	0.00355711	3.50462	5.58925e-64	0.538374	1	0.620782	1	1.12564	0.223029	3.24272	1.92252e-33	0.504344	1	2.42001	1.91432e-13	0.659103	1	0.585088	1	3.97476	3.08475e-13
Ey	0.724927	1	1.18904	0.0194474	0.889605	1	1.4568	7.62958e-06	0.720207	1	1.03449	0.715778	0.888159	1	1.42392	0.00100294	0.831714	1	1.76003	0.000157568	0.859858	1	1.14971	0.582891
Hr	0.813462	1	1.25615	0.00549694	2.97812	1.63472e-46	0.809589	1	0.581321	1	0.975109	1	2.82539	4.63397e-25	0.675182	1	2.11016	1.89555e-09	1.29705	0.159929	0.602451	1	3.44629	2.29836e-10

## Sheet: highly expressed genes
Br	Hd	Cr	Mg	Hg	Tb	Tg	Cs	Sg	Fb	Ey	Hr
FBgn0030330	FBgn0040736	FBgn0003559	FBgn0030073	FBgn0034553	FBgn0001128	FBgn0030330	FBgn0040736	FBgn0001128	FBgn0001128	FBgn0038966	FBgn0034454
FBgn0030872	FBgn0038966	FBgn0036773	FBgn0034789	FBgn0033529	FBgn0037936	FBgn0034789	FBgn0034454	FBgn0034350	FBgn0040736	FBgn0030073	FBgn0038966
FBgn0034789	FBgn0011283	FBgn0033529	FBgn0003559	FBgn0037936	FBgn0034611	FBgn0083975	FBgn0038966	FBgn0083975	FBgn0034454	FBgn0003861	FBgn0034350
FBgn0083975	FBgn0034789	FBgn0053556	FBgn0037936	FBgn0028381	FBgn0028381	FBgn0025878	FBgn0030872	FBgn0003559	FBgn0038966	FBgn0025878	FBgn0030073
FBgn0025878	FBgn0003861	FBgn0032218	FBgn0003053	FBgn0053556	FBgn0035871	FBgn0053556	FBgn0034326	FBgn0033529	FBgn0030073	FBgn0003447	FBgn0003053
FBgn0002781	FBgn0025878	FBgn0034958	FBgn0028381	FBgn0032218	FBgn0024846	FBgn0034380	FBgn0037936	FBgn0034611	FBgn0003053	FBgn0036773	FBgn0035871
FBgn0020620	FBgn0037936	FBgn0035501	FBgn0038110	FBgn0034958	FBgn0032218	FBgn0011829	FBgn0031500	FBgn0040087	FBgn0035871	FBgn0020497	FBgn0032218
FBgn0010414	FBgn0053556	FBgn0053519	FBgn0020620	FBgn0035501	FBgn0020620	FBgn0020620	FBgn0053556	FBgn0053556	FBgn0032218	FBgn0033529	FBgn0020620
FBgn0038678	FBgn0010414	FBgn0027596	FBgn0034958	FBgn0033301	FBgn0034958	FBgn0010414	FBgn0038820	FBgn0035871	FBgn0020620	FBgn0037936	FBgn0034958
FBgn0034958	FBgn0034958	FBgn0027585	FBgn0031948	FBgn0053519	FBgn0031948	FBgn0038678	FBgn0032218	FBgn0039531	FBgn0034958	FBgn0003053	FBgn0053519
FBgn0031948	FBgn0035501	FBgn0003386	FBgn0033301	FBgn0027596	FBgn0016684	FBgn0034958	FBgn0020620	FBgn0034958	FBgn0033095	FBgn0053556	FBgn0015035
FBgn0024728	FBgn0031948	FBgn0039226	FBgn0039475	FBgn0027585	FBgn0027596	FBgn0031948	FBgn0034958	FBgn0027596	FBgn0015035	FBgn0035871	FBgn0033668
FBgn0027596	FBgn0010240	FBgn0033668	FBgn0027585	FBgn0032775	FBgn0027585	FBgn0024728	FBgn0035501	FBgn0027585	FBgn0033668	FBgn0020620	FBgn0011770
FBgn0035229	FBgn0035170	FBgn0033130	FBgn0032775	FBgn0039226	FBgn0032706	FBgn0027596	FBgn0053519	FBgn0052676	FBgn0011770	FBgn0010414	FBgn0032032
FBgn0010240	FBgn0015035	FBgn0039667	FBgn0003386	FBgn0033443	FBgn0015035	FBgn0035229	FBgn0027585	FBgn0038642	FBgn0035186	FBgn0034958	FBgn0035186
FBgn0027585	FBgn0003386	FBgn0030318	FBgn0033443	FBgn0035574	FBgn0033443	FBgn0010240	FBgn0015035	FBgn0035574	FBgn0004859	FBgn0035501	FBgn0039667
FBgn0035170	FBgn0003371	FBgn0259150	FBgn0033668	FBgn0033668	FBgn0033668	FBgn0027585	FBgn0033668	FBgn0033668	FBgn0035392	FBgn0031948	FBgn0259150
FBgn0032706	FBgn0035574	FBgn0038541	FBgn0011770	FBgn0033130	FBgn0011770	FBgn0002036	FBgn0033130	FBgn0033130	FBgn0259150	FBgn0010240	FBgn0041111
FBgn0003386	FBgn0033668	FBgn0052311	FBgn0030318	FBgn0261053	FBgn0004859	FBgn0035170	FBgn0028888	FBgn0028888	FBgn0000568	FBgn0002036	FBgn0052311
FBgn0003371	FBgn0022942	FBgn0032670	FBgn0035049	FBgn0038753	FBgn0035392	FBgn0003386	FBgn0035186	FBgn0052600	FBgn0000448	FBgn0015035	FBgn0032670
FBgn0033668	FBgn0028888	FBgn0041582	FBgn0259150	FBgn0030859	FBgn0035049	FBgn0003371	FBgn0039667	FBgn0000482	FBgn0011225	FBgn0003371	FBgn0036857
FBgn0027885	FBgn0035186	FBgn0050147	FBgn0011555	FBgn0035049	FBgn0011225	FBgn0027885	FBgn0000568	FBgn0003274	FBgn0032782	FBgn0035574	FBgn0034335
FBgn0022942	FBgn0037060	FBgn0013995	FBgn0032782	FBgn0259150	FBgn0035001	FBgn0022942	FBgn0038541	FBgn0259150	FBgn0036857	FBgn0033668	FBgn0259938
FBgn0020496	FBgn0052600	FBgn0033438	FBgn0024288	FBgn0038541	FBgn0032782	FBgn0032032	FBgn0052311	FBgn0053543	FBgn0086913	FBgn0052438	FBgn0030245
FBgn0032032	FBgn0038541	FBgn0030884	FBgn0037094	FBgn0041111	FBgn0032670	FBgn0037060	FBgn0032670	FBgn0038541	FBgn0036975	FBgn0032032	FBgn0002284
FBgn0037060	FBgn0000448	FBgn0037427	FBgn0033048	FBgn0035001	FBgn0036857	FBgn0052600	FBgn0036857	FBgn0053547	FBgn0259938	FBgn0037060	FBgn0046876
FBgn0052600	FBgn0011591	FBgn0053474	FBgn0086913	FBgn0032782	FBgn0033048	FBgn0259150	FBgn0086913	FBgn0035001	FBgn0002284	FBgn0052600	FBgn0029828
FBgn0259150	FBgn0032670	FBgn0039238	FBgn0013995	FBgn0052311	FBgn0013995	FBgn0000568	FBgn0036975	FBgn0032258	FBgn0046876	FBgn0259150	FBgn0033605
FBgn0000568	FBgn0000320	FBgn0261111	FBgn0036975	FBgn0024288	FBgn0036975	FBgn0053547	FBgn0011206	FBgn0024288	FBgn0051673	FBgn0038541	FBgn0038326
FBgn0053547	FBgn0036857	FBgn0038511	FBgn0030245	FBgn0041582	FBgn0050104	FBgn0000448	FBgn0046876	FBgn0036667	FBgn0053128	FBgn0041111	FBgn0053474
FBgn0041111	FBgn0050147	FBgn0024238	FBgn0051673	FBgn0050147	FBgn0034335	FBgn0032782	FBgn0029828	FBgn0050147	FBgn0029828	FBgn0000448	FBgn0003965
FBgn0000448	FBgn0086913	FBgn0013305	FBgn0029828	FBgn0013995	FBgn0034854	FBgn0011591	FBgn0083963	FBgn0050104	FBgn0036544	FBgn0011225	FBgn0039184
FBgn0011591	FBgn0013995	FBgn0259145	FBgn0032234	FBgn0034335	FBgn0039311	FBgn0041582	FBgn0036544	FBgn0031879	FBgn0019650	FBgn0035001	FBgn0034761
FBgn0035033	FBgn0036975	FBgn0035104	FBgn0034318	FBgn0051118	FBgn0051663	FBgn0036857	FBgn0030884	FBgn0053128	FBgn0030884	FBgn0032782	FBgn0013305
FBgn0041582	FBgn0051118	FBgn0260632	FBgn0260657	FBgn0030884	FBgn0259938	FBgn0086913	FBgn0038326	FBgn0083963	FBgn0038326	FBgn0011591	FBgn0259145
FBgn0086913	FBgn0038693	FBgn0022800	FBgn0053474	FBgn0038326	FBgn0030245	FBgn0051118	FBgn0040532	FBgn0036544	FBgn0053474	FBgn0032670	FBgn0004577
FBgn0051118	FBgn0051663	FBgn0040491	FBgn0050381	FBgn0037427	FBgn0051673	FBgn0038693	FBgn0053474	FBgn0019650	FBgn0039238	FBgn0000320	FBgn0260632
FBgn0038693	FBgn0043005	FBgn0040968	FBgn0259101	FBgn0040532	FBgn0053128	FBgn0051663	FBgn0039238	FBgn0040344	FBgn0003965	FBgn0050147	FBgn0040968
FBgn0051663	FBgn0046876	FBgn0034693	FBgn0024238	FBgn0053474	FBgn0038326	FBgn0043005	FBgn0003965	FBgn0033605	FBgn0039184	FBgn0086913	FBgn0038039
FBgn0043005	FBgn0029828	FBgn0032816	FBgn0031518	FBgn0261111	FBgn0053474	FBgn0035267	FBgn0039184	FBgn0260657	FBgn0013305	FBgn0013995	FBgn0030703
FBgn0035267	FBgn0033438	FBgn0004870	FBgn0259145	FBgn0013305	FBgn0261111	FBgn0033438	FBgn0034761	FBgn0040532	FBgn0259145	FBgn0031879	FBgn0037548
FBgn0033438	FBgn0083963	FBgn0030703	FBgn0037996	FBgn0031518	FBgn0259101	FBgn0037015	FBgn0037625	FBgn0053474	FBgn0004577	FBgn0051118	FBgn0004449
FBgn0083963	FBgn0036544	FBgn0037548	FBgn0040491	FBgn0259145	FBgn0013305	FBgn0040344	FBgn0259145	FBgn0261111	FBgn0040968	FBgn0038693	FBgn0031250
FBgn0036544	FBgn0037015	FBgn0035542	FBgn0051633	FBgn0035104	FBgn0259145	FBgn0033605	FBgn0035104	FBgn0013305	FBgn0031805	FBgn0046876	FBgn0037912
FBgn0019650	FBgn0033500	FBgn0259236	FBgn0038438	FBgn0260632	FBgn0020880	FBgn0030884	FBgn0260632	FBgn0053531	FBgn0030703	FBgn0029828	FBgn0035542
FBgn0037015	FBgn0040532	FBgn0033728	FBgn0037548	FBgn0022800	FBgn0031590	FBgn0033500	FBgn0022800	FBgn0031518	FBgn0037548	FBgn0083963	FBgn0016061
FBgn0040344	FBgn0053474	FBgn0038983	FBgn0002609	FBgn0040491	FBgn0039452	FBgn0040532	FBgn0040968	FBgn0259145	FBgn0031250	FBgn0036544	FBgn0033949
FBgn0030884	FBgn0039238	FBgn0043364	FBgn0035252	FBgn0020880	FBgn0037548	FBgn0013753	FBgn0034693	FBgn0035104	FBgn0037912	FBgn0019650	FBgn0029922
FBgn0033500	FBgn0003965	FBgn0039092	FBgn0037912	FBgn0040968	FBgn0032669	FBgn0024238	FBgn0031805	FBgn0004577	FBgn0035542	FBgn0033605	FBgn0046763
FBgn0040532	FBgn0034761	FBgn0020414	FBgn0085265	FBgn0004870	FBgn0035252	FBgn0013305	FBgn0039452	FBgn0040491	FBgn0029922	FBgn0033500	FBgn0035113
FBgn0013753	FBgn0013305	FBgn0040828	FBgn0051704	FBgn0037548	FBgn0259236	FBgn0032651	FBgn0029158	FBgn0020880	FBgn0046763	FBgn0040532	FBgn0085386
FBgn0024238	FBgn0032651	FBgn0034484	FBgn0259236	FBgn0085265	FBgn0052669	FBgn0037625	FBgn0030703	FBgn0025740	FBgn0085412	FBgn0039238	FBgn0031701
FBgn0013305	FBgn0035104	FBgn0037044	FBgn0052669	FBgn0259236	FBgn0029922	FBgn0259145	FBgn0003975	FBgn0259176	FBgn0035113	FBgn0024238	FBgn0260943
FBgn0032651	FBgn0022800	FBgn0038761	FBgn0016797	FBgn0052669	FBgn0046763	FBgn0025740	FBgn0037548	FBgn0035721	FBgn0043364	FBgn0013305	FBgn0039092
FBgn0021895	FBgn0040491	FBgn0020304	FBgn0020506	FBgn0029922	FBgn0024556	FBgn0259176	FBgn0004449	FBgn0038438	FBgn0085386	FBgn0259145	FBgn0020414
FBgn0029899	FBgn0040968	FBgn0031801	FBgn0039092	FBgn0035113	FBgn0039402	FBgn0004870	FBgn0031250	FBgn0033550	FBgn0031701	FBgn0035104	FBgn0040828
FBgn0053531	FBgn0034693	FBgn0038238	FBgn0028663	FBgn0004133	FBgn0039092	FBgn0029768	FBgn0036597	FBgn0037912	FBgn0260943	FBgn0015024	FBgn0036549
FBgn0037625	FBgn0004870	FBgn0040837	FBgn0030792	FBgn0039092	FBgn0020414	FBgn0003975	FBgn0037912	FBgn0260990	FBgn0020414	FBgn0004577	FBgn0040735
FBgn0259145	FBgn0029768	FBgn0041181	FBgn0030270	FBgn0020414	FBgn0028663	FBgn0004449	FBgn0035542	FBgn0029922	FBgn0036549	FBgn0022800	FBgn0039685
FBgn0015024	FBgn0037548	FBgn0041205	FBgn0038761	FBgn0028663	FBgn0036549	FBgn0028429	FBgn0033949	FBgn0036643	FBgn0040735	FBgn0040491	FBgn0038761
FBgn0025740	FBgn0004449	FBgn0036454	FBgn0040837	FBgn0034470	FBgn0037222	FBgn0027654	FBgn0033728	FBgn0046763	FBgn0039685	FBgn0034693	FBgn0020304
FBgn0259176	FBgn0027654	FBgn0035132	FBgn0051410	FBgn0038761	FBgn0038761	FBgn0016061	FBgn0046763	FBgn0085412	FBgn0030270	FBgn0259176	FBgn0036337
FBgn0004870	FBgn0036597	FBgn0052082	FBgn0050411	FBgn0020304	FBgn0031801	FBgn0029922	FBgn0085412	FBgn0035113	FBgn0038761	FBgn0004449	FBgn0028480
FBgn0029768	FBgn0033949	FBgn0000504	FBgn0005664	FBgn0031801	FBgn0040837	FBgn0032886	FBgn0035113	FBgn0040005	FBgn0036337	FBgn0033550	FBgn0008646
FBgn0003975	FBgn0033728	FBgn0033052	FBgn0030040	FBgn0023525	FBgn0023525	FBgn0085412	FBgn0085386	FBgn0004133	FBgn0028480	FBgn0027654	FBgn0015791
FBgn0004449	FBgn0029922	FBgn0034432	FBgn0041205	FBgn0050411	FBgn0050411	FBgn0035113	FBgn0033574	FBgn0043364	FBgn0021765	FBgn0036597	FBgn0023525
FBgn0027654	FBgn0046763	FBgn0040206	FBgn0035132	FBgn0041181	FBgn0041205	FBgn0040005	FBgn0032415	FBgn0002593	FBgn0023525	FBgn0035542	FBgn0030968
FBgn0016061	FBgn0032886	FBgn0031488	FBgn0051089	FBgn0036454	FBgn0030968	FBgn0029864	FBgn0031701	FBgn0085386	FBgn0030968	FBgn0033728	FBgn0030482
FBgn0029922	FBgn0085412	FBgn0031426	FBgn0036320	FBgn0035132	FBgn0030482	FBgn0004133	FBgn0260943	FBgn0024833	FBgn0030482	FBgn0036643	FBgn0029709
FBgn0036643	FBgn0035113	FBgn0045073	FBgn0028534	FBgn0052082	FBgn0000504	FBgn0085386	FBgn0039092	FBgn0260943	FBgn0000504	FBgn0032886	FBgn0000504
FBgn0032886	FBgn0033574	FBgn0004858	FBgn0011592	FBgn0031488	FBgn0010303	FBgn0260943	FBgn0020414	FBgn0039092	FBgn0033052	FBgn0035113	FBgn0033052
FBgn0031883	FBgn0032415	FBgn0032010	FBgn0032734	FBgn0031299	FBgn0031299	FBgn0039092	FBgn0040828	FBgn0020414	FBgn0034432	FBgn0004133	FBgn0034432
FBgn0085412	FBgn0031701	FBgn0004622	FBgn0015000	FBgn0004858	FBgn0011754	FBgn0020414	FBgn0034484	FBgn0015521	FBgn0040206	FBgn0085386	FBgn0053307
FBgn0040005	FBgn0039092	FBgn0039641	FBgn0036767	FBgn0004622	FBgn0039049	FBgn0031463	FBgn0036549	FBgn0028663	FBgn0053307	FBgn0033574	FBgn0032287
FBgn0029864	FBgn0020414	FBgn0000318	FBgn0004622	FBgn0037683	FBgn0015000	FBgn0037142	FBgn0040735	FBgn0030792	FBgn0051414	FBgn0032415	FBgn0031694
FBgn0085386	FBgn0034470	FBgn0053208	FBgn0037845	FBgn0039641	FBgn0000566	FBgn0020304	FBgn0039685	FBgn0046301	FBgn0031299	FBgn0024833	FBgn0029783
FBgn0260943	FBgn0040735	FBgn0030927	FBgn0029121	FBgn0037845	FBgn0036117	FBgn0015247	FBgn0030792	FBgn0038761	FBgn0032287	FBgn0031701	FBgn0004622
FBgn0039092	FBgn0039685	FBgn0031322	FBgn0036993	FBgn0003380	FBgn0045073	FBgn0034350	FBgn0038761	FBgn0031574	FBgn0063923	FBgn0260943	FBgn0032382
FBgn0020414	FBgn0032798	FBgn0260003	FBgn0000318	FBgn0000451	FBgn0030998	FBgn0028480	FBgn0036337	FBgn0015247	FBgn0031694	FBgn0039092	FBgn0038947
FBgn0031463	FBgn0021765	FBgn0001624	FBgn0031143	FBgn0036993	FBgn0035333	FBgn0032798	FBgn0028480	FBgn0028480	FBgn0030913	FBgn0040735	FBgn0039641
FBgn0037142	FBgn0023525	FBgn0261261	FBgn0065032	FBgn0025686	FBgn0037683	FBgn0008646	FBgn0038238	FBgn0021765	FBgn0029783	FBgn0039685	FBgn0003380
FBgn0015247	FBgn0032447	FBgn0035702	FBgn0052115	FBgn0030927	FBgn0037845	FBgn0015791	FBgn0023525	FBgn0050411	FBgn0015568	FBgn0000253	FBgn0036993
FBgn0034350	FBgn0036560	FBgn0025525	FBgn0015011	FBgn0031322	FBgn0000318	FBgn0021765	FBgn0041181	FBgn0024733	FBgn0035333	FBgn0040907	FBgn0025686
FBgn0032798	FBgn0041181	FBgn0033978	FBgn0038180	FBgn0260003	FBgn0025686	FBgn0023525	FBgn0034515	FBgn0036454	FBgn0032382	FBgn0020304	FBgn0052115
FBgn0015791	FBgn0032023	FBgn0051522	FBgn0036752	FBgn0032729	FBgn0031143	FBgn0032447	FBgn0036454	FBgn0029709	FBgn0038947	FBgn0015791	FBgn0032729
FBgn0021765	FBgn0036454	FBgn0001321	FBgn0025525	FBgn0041096	FBgn0065032	FBgn0036560	FBgn0030968	FBgn0051089	FBgn0039641	FBgn0021765	FBgn0001624
FBgn0023525	FBgn0030968	FBgn0040323	FBgn0003514	FBgn0015011	FBgn0052115	FBgn0032023	FBgn0030482	FBgn0000504	FBgn0036993	FBgn0032447	FBgn0029761
FBgn0032447	FBgn0052082	FBgn0051769	FBgn0038897	FBgn0001624	FBgn0005636	FBgn0036454	FBgn0052082	FBgn0003041	FBgn0003380	FBgn0036560	FBgn0031560
FBgn0036560	FBgn0033196	FBgn0040259	FBgn0003358	FBgn0036752	FBgn0260003	FBgn0033196	FBgn0000504	FBgn0034432	FBgn0025686	FBgn0041181	FBgn0025525
FBgn0032023	FBgn0053307	FBgn0045761	FBgn0033978	FBgn0031560	FBgn0032729	FBgn0033052	FBgn0034432	FBgn0036998	FBgn0052115	FBgn0005664	FBgn0038897
FBgn0036454	FBgn0051414	FBgn0015380	FBgn0033778	FBgn0025525	FBgn0041096	FBgn0035026	FBgn0053307	FBgn0011272	FBgn0038745	FBgn0036454	FBgn0015793
FBgn0033196	FBgn0031299	FBgn0036622	FBgn0051522	FBgn0003514	FBgn0015011	FBgn0031299	FBgn0051414	FBgn0063923	FBgn0260003	FBgn0029709	FBgn0051769
FBgn0033052	FBgn0032287	FBgn0014011	FBgn0031249	FBgn0033978	FBgn0261261	FBgn0011754	FBgn0032287	FBgn0015000	FBgn0032729	FBgn0052082	FBgn0034670
FBgn0010303	FBgn0032734	FBgn0019982	FBgn0034345	FBgn0051522	FBgn0038180	FBgn0029955	FBgn0011754	FBgn0000566	FBgn0031560	FBgn0033196	FBgn0033782
FBgn0035026	FBgn0030562	FBgn0035708	FBgn0035083	FBgn0001321	FBgn0025525	FBgn0004858	FBgn0063923	FBgn0036044	FBgn0038897	FBgn0033052	FBgn0034400
FBgn0011592	FBgn0029955	FBgn0030272	FBgn0040259	FBgn0040323	FBgn0038897	FBgn0030913	FBgn0030562	FBgn0045073	FBgn0005278	FBgn0031488	FBgn0045761
FBgn0031299	FBgn0002936	FBgn0031975	FBgn0033775	FBgn0035083	FBgn0033978	FBgn0040964	FBgn0027785	FBgn0004858	FBgn0033978	FBgn0053307	FBgn0014011
FBgn0029955	FBgn0031694	FBgn0052594	FBgn0034670	FBgn0040259	FBgn0035083	FBgn0035333	FBgn0031694	FBgn0004622	FBgn0040323	FBgn0031299	FBgn0019982
FBgn0004858	FBgn0030913	FBgn0050372	FBgn0053966	FBgn0033775	FBgn0051637	FBgn0085433	FBgn0036044	FBgn0038947	FBgn0051769	FBgn0038400	FBgn0030272
FBgn0030913	FBgn0015568	FBgn0003996	FBgn0015919	FBgn0036144	FBgn0033782	FBgn0004622	FBgn0004858	FBgn0017579	FBgn0033775	FBgn0030562	FBgn0033353
FBgn0040964	FBgn0085433	FBgn0030300	FBgn0259834	FBgn0053966	FBgn0037215	FBgn0003380	FBgn0029783	FBgn0039641	FBgn0030196	FBgn0002936	FBgn0032246
FBgn0035333	FBgn0004622	FBgn0015773	FBgn0037440	FBgn0259834	FBgn0030873	FBgn0036319	FBgn0032382	FBgn0003380	FBgn0037440	FBgn0035333	FBgn0015773
FBgn0085433	FBgn0032382	FBgn0037680	FBgn0033782	FBgn0032910	FBgn0039283	FBgn0035481	FBgn0038947	FBgn0025686	FBgn0033782	FBgn0085433	FBgn0034602
FBgn0004622	FBgn0003380	FBgn0031959	FBgn0037215	FBgn0045761	FBgn0010348	FBgn0025686	FBgn0037845	FBgn0005636	FBgn0005694	FBgn0039641	FBgn0039613
FBgn0003380	FBgn0004618	FBgn0035331	FBgn0030873	FBgn0031011	FBgn0039849	FBgn0004108	FBgn0036993	FBgn0030927	FBgn0045761	FBgn0003380	FBgn0033132
FBgn0036319	FBgn0036993	FBgn0025638	FBgn0034400	FBgn0014011	FBgn0036323	FBgn0005636	FBgn0003380	FBgn0037328	FBgn0031011	FBgn0004618	FBgn0019952
FBgn0035481	FBgn0036319	FBgn0037012	FBgn0045761	FBgn0028699	FBgn0027279	FBgn0053208	FBgn0038398	FBgn0038834	FBgn0034733	FBgn0036993	FBgn0036208
FBgn0025686	FBgn0038398	FBgn0032264	FBgn0031011	FBgn0019982	FBgn0045761	FBgn0032191	FBgn0025686	FBgn0260003	FBgn0019982	FBgn0036319	FBgn0033388
FBgn0004108	FBgn0035481	FBgn0003862	FBgn0036622	FBgn0030272	FBgn0036294	FBgn0260003	FBgn0051200	FBgn0032729	FBgn0030272	FBgn0038398	FBgn0032785
FBgn0005636	FBgn0004108	FBgn0037222	FBgn0014011	FBgn0031975	FBgn0034733	FBgn0261261	FBgn0038745	FBgn0250755	FBgn0052594	FBgn0000318	FBgn0035331
FBgn0053208	FBgn0051200	FBgn0025832	FBgn0030756	FBgn0052594	FBgn0019982	FBgn0000108	FBgn0053208	FBgn0035965	FBgn0033353	FBgn0035481	FBgn0025638
FBgn0260003	FBgn0031775	FBgn0031090	FBgn0034295	FBgn0050372	FBgn0003996	FBgn0010280	FBgn0030927	FBgn0002579	FBgn0051102	FBgn0052816	FBgn0032264
FBgn0250755	FBgn0005636	FBgn0000024	FBgn0051102	FBgn0051102	FBgn0051102	FBgn0030640	FBgn0031322	FBgn0261261	FBgn0034602	FBgn0051200	FBgn0023537
FBgn0001624	FBgn0053208	FBgn0032247	FBgn0030300	FBgn0030300	FBgn0038957	FBgn0025525	FBgn0261261	FBgn0260856	FBgn0039613	FBgn0031775	FBgn0037222
FBgn0261261	FBgn0030927	FBgn0036789	FBgn0015773	FBgn0015773	FBgn0034602	FBgn0051151	FBgn0261341	FBgn0029761	FBgn0032262	FBgn0032191	FBgn0036032
FBgn0000108	FBgn0031322	FBgn0004370	FBgn0034602	FBgn0031959	FBgn0019952	FBgn0003710	FBgn0038180	FBgn0025525	FBgn0085376	FBgn0015011	FBgn0031090
FBgn0010280	FBgn0000108	FBgn0030992	FBgn0034417	FBgn0032785	FBgn0030932	FBgn0033347	FBgn0029761	FBgn0003514	FBgn0019952	FBgn0001624	FBgn0260794
FBgn0030640	FBgn0038180	FBgn0030332	FBgn0004394	FBgn0030887	FBgn0025640	FBgn0083950	FBgn0031560	FBgn0038897	FBgn0036208	FBgn0004103	FBgn0035279
FBgn0039966	FBgn0031560	FBgn0014163	FBgn0037012	FBgn0004394	FBgn0023537	FBgn0038641	FBgn0034468	FBgn0086681	FBgn0033388	FBgn0000108	FBgn0041194
FBgn0024921	FBgn0033347	FBgn0029979	FBgn0002571	FBgn0037012	FBgn0036980	FBgn0039808	FBgn0040323	FBgn0040259	FBgn0035331	FBgn0038180	FBgn0085360
FBgn0051151	FBgn0033778	FBgn0022960	FBgn0031118	FBgn0032264	FBgn0040348	FBgn0028372	FBgn0051769	FBgn0036144	FBgn0025638	FBgn0031560	FBgn0015372
FBgn0003710	FBgn0040323	FBgn0037565	FBgn0051087	FBgn0003862	FBgn0011289	FBgn0034345	FBgn0052183	FBgn0035622	FBgn0037467	FBgn0003514	FBgn0026076
FBgn0033347	FBgn0051769	FBgn0037138	FBgn0260794	FBgn0051087	FBgn0033451	FBgn0052183	FBgn0040259	FBgn0024989	FBgn0032264	FBgn0033347	FBgn0000479
FBgn0033778	FBgn0038641	FBgn0016756	FBgn0000024	FBgn0035279	FBgn0040507	FBgn0033775	FBgn0033775	FBgn0037440	FBgn0037222	FBgn0033778	FBgn0037801
FBgn0083950	FBgn0034475	FBgn0063495	FBgn0030774	FBgn0037696	FBgn0037024	FBgn0036144	FBgn0033782	FBgn0051637	FBgn0035909	FBgn0040323	FBgn0052647
FBgn0038641	FBgn0039808	FBgn0013718	FBgn0033788	FBgn0030992	FBgn0037526	FBgn0015919	FBgn0031066	FBgn0037215	FBgn0031090	FBgn0038641	FBgn0029979
FBgn0039808	FBgn0052183	FBgn0000711	FBgn0051463	FBgn0030332	FBgn0036727	FBgn0051637	FBgn0027279	FBgn0030873	FBgn0041194	FBgn0039808	FBgn0037565
FBgn0028372	FBgn0040259	FBgn0027572	FBgn0040507	FBgn0037934	FBgn0030332	FBgn0036934	FBgn0045761	FBgn0010348	FBgn0085360	FBgn0052183	FBgn0034717
FBgn0034345	FBgn0033775	FBgn0034142	FBgn0036789	FBgn0037565	FBgn0037934	FBgn0016797	FBgn0028699	FBgn0034400	FBgn0033451	FBgn0029822	FBgn0013718
FBgn0052183	FBgn0036144	FBgn0037465	FBgn0030148	FBgn0037138	FBgn0063495	FBgn0039283	FBgn0019982	FBgn0005694	FBgn0036697	FBgn0036934	FBgn0027572
FBgn0033775	FBgn0051637	FBgn0004435	FBgn0036727	FBgn0016756	FBgn0034717	FBgn0038055	FBgn0030272	FBgn0031066	FBgn0053087	FBgn0039283	FBgn0261285
FBgn0036144	FBgn0036934	FBgn0259216	FBgn0030332	FBgn0063495	FBgn0036770	FBgn0259823	FBgn0031975	FBgn0036323	FBgn0037801	FBgn0038055	FBgn0033320
FBgn0015919	FBgn0016797	FBgn0261285	FBgn0037934	FBgn0013718	FBgn0034142	FBgn0085434	FBgn0032494	FBgn0045761	FBgn0004369	FBgn0259823	FBgn0031937
FBgn0029822	FBgn0039283	FBgn0033320	FBgn0035040	FBgn0036770	FBgn0000635	FBgn0005694	FBgn0031959	FBgn0034733	FBgn0052647	FBgn0005694	FBgn0001168
FBgn0051637	FBgn0259823	FBgn0001168	FBgn0063495	FBgn0027572	FBgn0031547	FBgn0052432	FBgn0250814	FBgn0085426	FBgn0029979	FBgn0052432	FBgn0035020
FBgn0036934	FBgn0085434	FBgn0014391	FBgn0034717	FBgn0260642	FBgn0001168	FBgn0028482	FBgn0039178	FBgn0019982	FBgn0034717	FBgn0028482	FBgn0014391
FBgn0033638	FBgn0005694	FBgn0085447	FBgn0036770	FBgn0034142	FBgn0001296	FBgn0013725	FBgn0085376	FBgn0035708	FBgn0027572	FBgn0013725	FBgn0001296
FBgn0016797	FBgn0052432	FBgn0013751	FBgn0027572	FBgn0037465	FBgn0039313	FBgn0038929	FBgn0019952	FBgn0052654	FBgn0260642	FBgn0027279	FBgn0013751
FBgn0039283	FBgn0028482	FBgn0024985	FBgn0038415	FBgn0028491	FBgn0031548	FBgn0027279	FBgn0036208	FBgn0052594	FBgn0004435	FBgn0045761	FBgn0035876
FBgn0038055	FBgn0013725	FBgn0052645	FBgn0010043	FBgn0004435	FBgn0037090	FBgn0260817	FBgn0033388	FBgn0260860	FBgn0261285	FBgn0036294	FBgn0031548
FBgn0259823	FBgn0038929	FBgn0035876	FBgn0028491	FBgn0034354	FBgn0051710	FBgn0045761	FBgn0035331	FBgn0011672	FBgn0010591	FBgn0053512	FBgn0051051
FBgn0085434	FBgn0027279	FBgn0029506	FBgn0004435	FBgn0259216	FBgn0033981	FBgn0036294	FBgn0032264	FBgn0051102	FBgn0033320	FBgn0015380	FBgn0035734
FBgn0005694	FBgn0036015	FBgn0031688	FBgn0051041	FBgn0261285	FBgn0030562	FBgn0053512	FBgn0260794	FBgn0030300	FBgn0031937	FBgn0030272	FBgn0036806
FBgn0052432	FBgn0036294	FBgn0037153	FBgn0261285	FBgn0001168	FBgn0036806	FBgn0015380	FBgn0035279	FBgn0039613	FBgn0001168	FBgn0260860	FBgn0023479
FBgn0028482	FBgn0053512	FBgn0036790	FBgn0010591	FBgn0085447	FBgn0036790	FBgn0028699	FBgn0040985	FBgn0085376	FBgn0086674	FBgn0033353	FBgn0259219
FBgn0013725	FBgn0015380	FBgn0259219	FBgn0023197	FBgn0024985	FBgn0040383	FBgn0044510	FBgn0041194	FBgn0014075	FBgn0039969	FBgn0003996	FBgn0040383
FBgn0038929	FBgn0028699	FBgn0031313	FBgn0001168	FBgn0033667	FBgn0036552	FBgn0028406	FBgn0085360	FBgn0032785	FBgn0085447	FBgn0039536	FBgn0031313
FBgn0027279	FBgn0034286	FBgn0038874	FBgn0035020	FBgn0031548	FBgn0040805	FBgn0019982	FBgn0053087	FBgn0035331	FBgn0013751	FBgn0032797	FBgn0038874
FBgn0260817	FBgn0030272	FBgn0043841	FBgn0013751	FBgn0029506	FBgn0052441	FBgn0034286	FBgn0023023	FBgn0030734	FBgn0035876	FBgn0032494	FBgn0031261
FBgn0036294	FBgn0052594	FBgn0028427	FBgn0031548	FBgn0031688	FBgn0038874	FBgn0031064	FBgn0030332	FBgn0037467	FBgn0037090	FBgn0031959	FBgn0040609
FBgn0053512	FBgn0039536	FBgn0040609	FBgn0037090	FBgn0037153	FBgn0038337	FBgn0030272	FBgn0037801	FBgn0037012	FBgn0030562	FBgn0033132	FBgn0036545
FBgn0015380	FBgn0039613	FBgn0011674	FBgn0033297	FBgn0033981	FBgn0038881	FBgn0034308	FBgn0033252	FBgn0023537	FBgn0035734	FBgn0039178	FBgn0011674
FBgn0039730	FBgn0032797	FBgn0033474	FBgn0033981	FBgn0036790	FBgn0051288	FBgn0052594	FBgn0004369	FBgn0005533	FBgn0036806	FBgn0033388	FBgn0036732
FBgn0085426	FBgn0032494	FBgn0041712	FBgn0030562	FBgn0040383	FBgn0034480	FBgn0050372	FBgn0052647	FBgn0003862	FBgn0023479	FBgn0035331	FBgn0039682
FBgn0028699	FBgn0031959	FBgn0029761	FBgn0036806	FBgn0031313	FBgn0027570	FBgn0030300	FBgn0034717	FBgn0031118	FBgn0002643	FBgn0031375	FBgn0033153
FBgn0044510	FBgn0033132	FBgn0002773	FBgn0036790	FBgn0038874	FBgn0033047	FBgn0034602	FBgn0027572	FBgn0035909	FBgn0036790	FBgn0025638	FBgn0029147
FBgn0028406	FBgn0039178	FBgn0032363	FBgn0040383	FBgn0043841	FBgn0052137	FBgn0039536	FBgn0260642	FBgn0036032	FBgn0040383	FBgn0260746	FBgn0031597
FBgn0034286	FBgn0085376	FBgn0030749	FBgn0036552	FBgn0038337	FBgn0038651	FBgn0032797	FBgn0036783	FBgn0031090	FBgn0031313	FBgn0004623	FBgn0034331
FBgn0031064	FBgn0019952	FBgn0250871	FBgn0038973	FBgn0040609	FBgn0030612	FBgn0033085	FBgn0010591	FBgn0035279	FBgn0038874	FBgn0037222	FBgn0016930
FBgn0030272	FBgn0005626	FBgn0036380	FBgn0034664	FBgn0038881	FBgn0005671	FBgn0033132	FBgn0033320	FBgn0037696	FBgn0040609	FBgn0040348	FBgn0003396
FBgn0034308	FBgn0036208	FBgn0036194	FBgn0040805	FBgn0034480	FBgn0036205	FBgn0039178	FBgn0000045	FBgn0035581	FBgn0036732	FBgn0034051	FBgn0020249
FBgn0052594	FBgn0033388	FBgn0031401	FBgn0038881	FBgn0033474	FBgn0039044	FBgn0085376	FBgn0031937	FBgn0036789	FBgn0036997	FBgn0036032	FBgn0259735
FBgn0050372	FBgn0032785	FBgn0051038	FBgn0011674	FBgn0041712	FBgn0027843	FBgn0019952	FBgn0085447	FBgn0024983	FBgn0034480	FBgn0031090	FBgn0040752
FBgn0039536	FBgn0035331	FBgn0016930	FBgn0051288	FBgn0052137	FBgn0051106	FBgn0005626	FBgn0052271	FBgn0037526	FBgn0033474	FBgn0260794	FBgn0051523
FBgn0032797	FBgn0031375	FBgn0083949	FBgn0034480	FBgn0034552	FBgn0050456	FBgn0036208	FBgn0035876	FBgn0036727	FBgn0022023	FBgn0000024	FBgn0013770
FBgn0033132	FBgn0025638	FBgn0020249	FBgn0033474	FBgn0033365	FBgn0015278	FBgn0036183	FBgn0033667	FBgn0023023	FBgn0014903	FBgn0035279	FBgn0035189
FBgn0039178	FBgn0260746	FBgn0051523	FBgn0052137	FBgn0005671	FBgn0032116	FBgn0035331	FBgn0031548	FBgn0052190	FBgn0039682	FBgn0053481	FBgn0003896
FBgn0085376	FBgn0004623	FBgn0015010	FBgn0002023	FBgn0033153	FBgn0035189	FBgn0025638	FBgn0037090	FBgn0000479	FBgn0030612	FBgn0041194	FBgn0038053
FBgn0019952	FBgn0052683	FBgn0003896	FBgn0034577	FBgn0030749	FBgn0051004	FBgn0030887	FBgn0050052	FBgn0013749	FBgn0037930	FBgn0085360	FBgn0031381
FBgn0005626	FBgn0037222	FBgn0042111	FBgn0014903	FBgn0250871	FBgn0027581	FBgn0004394	FBgn0033981	FBgn0039084	FBgn0036380	FBgn0036697	FBgn0035344
FBgn0036208	FBgn0040348	FBgn0050054	FBgn0033216	FBgn0031401	FBgn0042111	FBgn0052683	FBgn0035734	FBgn0004369	FBgn0034331	FBgn0038861	FBgn0028746
FBgn0036183	FBgn0031090	FBgn0260386	FBgn0005671	FBgn0051038	FBgn0030668	FBgn0003862	FBgn0036806	FBgn0037138	FBgn0083949	FBgn0023023	FBgn0015571
FBgn0033388	FBgn0040877	FBgn0004227	FBgn0036205	FBgn0083949	FBgn0259213	FBgn0031118	FBgn0023479	FBgn0013718	FBgn0003396	FBgn0026076	FBgn0050011
FBgn0035331	FBgn0000024	FBgn0032629	FBgn0033153	FBgn0030776	FBgn0050054	FBgn0040348	FBgn0259219	FBgn0000711	FBgn0003513	FBgn0052647	FBgn0037009
FBgn0031375	FBgn0035279	FBgn0250785	FBgn0036749	FBgn0020249	FBgn0039324	FBgn0034051	FBgn0031313	FBgn0034142	FBgn0051523	FBgn0022960	FBgn0262599
FBgn0025638	FBgn0053481	FBgn0038286	FBgn0036380	FBgn0050456	FBgn0037011	FBgn0036032	FBgn0037637	FBgn0035439	FBgn0013770	FBgn0037138	FBgn0035578
FBgn0030887	FBgn0041194	FBgn0011766	FBgn0039890	FBgn0032116	FBgn0038053	FBgn0031090	FBgn0031261	FBgn0030136	FBgn0035189	FBgn0013718	FBgn0033652
FBgn0004394	FBgn0085360	FBgn0041713	FBgn0027843	FBgn0051523	FBgn0053282	FBgn0028499	FBgn0040609	FBgn0010043	FBgn0259714	FBgn0000711	FBgn0052476
FBgn0052683	FBgn0035187	FBgn0262599	FBgn0034784	FBgn0051004	FBgn0026718	FBgn0040877	FBgn0036732	FBgn0037465	FBgn0030668	FBgn0036935	FBgn0051158
FBgn0003862	FBgn0051760	FBgn0003396	FBgn0030776	FBgn0042111	FBgn0015571	FBgn0000024	FBgn0036997	FBgn0030245	FBgn0259213	FBgn0000635	FBgn0031563
FBgn0031118	FBgn0023023	FBgn0030011	FBgn0050456	FBgn0083945	FBgn0040319	FBgn0053481	FBgn0002773	FBgn0004435	FBgn0038165	FBgn0035601	FBgn0034909
FBgn0040348	FBgn0030332	FBgn0038924	FBgn0015278	FBgn0050054	FBgn0038804	FBgn0035187	FBgn0039682	FBgn0261285	FBgn0050054	FBgn0261285	FBgn0035586
FBgn0034051	FBgn0037801	FBgn0039648	FBgn0033792	FBgn0028562	FBgn0037009	FBgn0036697	FBgn0040773	FBgn0031990	FBgn0035344	FBgn0033320	FBgn0035975
FBgn0036032	FBgn0033252	FBgn0038385	FBgn0032116	FBgn0037011	FBgn0004198	FBgn0053087	FBgn0029147	FBgn0035805	FBgn0028746	FBgn0000037	FBgn0014020
FBgn0031090	FBgn0039084	FBgn0004638	FBgn0031735	FBgn0260386	FBgn0260793	FBgn0032916	FBgn0250871	FBgn0001168	FBgn0032629	FBgn0031716	FBgn0052425
FBgn0028499	FBgn0052057	FBgn0039897	FBgn0035189	FBgn0044872	FBgn0001941	FBgn0051760	FBgn0036380	FBgn0035020	FBgn0040319	FBgn0031937	FBgn0030985
FBgn0260794	FBgn0051481	FBgn0035586	FBgn0051259	FBgn0053282	FBgn0035578	FBgn0023023	FBgn0034331	FBgn0014391	FBgn0050011	FBgn0035020	FBgn0016660
FBgn0040877	FBgn0052647	FBgn0035975	FBgn0000565	FBgn0083963	FBgn0033093	FBgn0026076	FBgn0039523	FBgn0027554	FBgn0004198	FBgn0029708	FBgn0039467
FBgn0000024	FBgn0022960	FBgn0014020	FBgn0051004	FBgn0250785	FBgn0003961	FBgn0062440	FBgn0083949	FBgn0024985	FBgn0039737	FBgn0015754	FBgn0010387
FBgn0053481	FBgn0037138	FBgn0085412	FBgn0259714	FBgn0050011	FBgn0032074	FBgn0000479	FBgn0003396	FBgn0033667	FBgn0053054	FBgn0010583	FBgn0040732
FBgn0028509	FBgn0063495	FBgn0003345	FBgn0030668	FBgn0011766	FBgn0052476	FBgn0030332	FBgn0003513	FBgn0037090	FBgn0052476	FBgn0013751	FBgn0034479
FBgn0035187	FBgn0013718	FBgn0000394	FBgn0259213	FBgn0001941	FBgn0029870	FBgn0033252	FBgn0031995	FBgn0003942	FBgn0031239	FBgn0024985	FBgn0030670
FBgn0053087	FBgn0044048	FBgn0030395	FBgn0085330	FBgn0032171	FBgn0038924	FBgn0052057	FBgn0051523	FBgn0029506	FBgn0051158	FBgn0021800	FBgn0020626
FBgn0032916	FBgn0000711	FBgn0040397	FBgn0028562	FBgn0035578	FBgn0027556	FBgn0051481	FBgn0013770	FBgn0036746	FBgn0031563	FBgn0031768	FBgn0051326
FBgn0051760	FBgn0027572	FBgn0003721	FBgn0044872	FBgn0032074	FBgn0014020	FBgn0004369	FBgn0035189	FBgn0051710	FBgn0040726	FBgn0033667	FBgn0034075
FBgn0023023	FBgn0034142	FBgn0039467	FBgn0026718	FBgn0053054	FBgn0085412	FBgn0052647	FBgn0000565	FBgn0037153	FBgn0038924	FBgn0051051	FBgn0028542
FBgn0026076	FBgn0036935	FBgn0010387	FBgn0086532	FBgn0052476	FBgn0041585	FBgn0029979	FBgn0030668	FBgn0030562	FBgn0034909	FBgn0051710	FBgn0014427
FBgn0062440	FBgn0000635	FBgn0039590	FBgn0083963	FBgn0038924	FBgn0003345	FBgn0022960	FBgn0050054	FBgn0036806	FBgn0035586	FBgn0037153	FBgn0038975
FBgn0000479	FBgn0261285	FBgn0022382	FBgn0040319	FBgn0027556	FBgn0032815	FBgn0037138	FBgn0037292	FBgn0002643	FBgn0014020	FBgn0035734	FBgn0037518
FBgn0030332	FBgn0033320	FBgn0030670	FBgn0038804	FBgn0038385	FBgn0000229	FBgn0013718	FBgn0035344	FBgn0040383	FBgn0052425	FBgn0040383	FBgn0037313
FBgn0033252	FBgn0053288	FBgn0034075	FBgn0032068	FBgn0034909	FBgn0040397	FBgn0000711	FBgn0037734	FBgn0010411	FBgn0030985	FBgn0000557	FBgn0031359
FBgn0052057	FBgn0000037	FBgn0038975	FBgn0001941	FBgn0035975	FBgn0085227	FBgn0260642	FBgn0004198	FBgn0037602	FBgn0016660	FBgn0052441	FBgn0063667
FBgn0052647	FBgn0031716	FBgn0000116	FBgn0035578	FBgn0014020	FBgn0039254	FBgn0031955	FBgn0036656	FBgn0052441	FBgn0030395	FBgn0038874	FBgn0039341
FBgn0029979	FBgn0031937	FBgn0037518	FBgn0039737	FBgn0085412	FBgn0035833	FBgn0036935	FBgn0041713	FBgn0038874	FBgn0010387	FBgn0016975	FBgn0086359
FBgn0022960	FBgn0032840	FBgn0039543	FBgn0032074	FBgn0030985	FBgn0034406	FBgn0000635	FBgn0262599	FBgn0036545	FBgn0085431	FBgn0034720	FBgn0086450
FBgn0037138	FBgn0035020	FBgn0039688	FBgn0052476	FBgn0000394	FBgn0039137	FBgn0036494	FBgn0035600	FBgn0038881	FBgn0030954	FBgn0016038	FBgn0032683
FBgn0044048	FBgn0029708	FBgn0039341	FBgn0035772	FBgn0040397	FBgn0001186	FBgn0261285	FBgn0031700	FBgn0033474	FBgn0040732	FBgn0036997	FBgn0025454
FBgn0031885	FBgn0015754	FBgn0086450	FBgn0051158	FBgn0085227	FBgn0031359	FBgn0000037	FBgn0262582	FBgn0014868	FBgn0034479	FBgn0024941	FBgn0051717
FBgn0000711	FBgn0010583	FBgn0032683	FBgn0038924	FBgn0039467	FBgn0063667	FBgn0031716	FBgn0031563	FBgn0024941	FBgn0036147	FBgn0029761	FBgn0050423
FBgn0031955	FBgn0052271	FBgn0005659	FBgn0039648	FBgn0085431	FBgn0259935	FBgn0035805	FBgn0029870	FBgn0041712	FBgn0051326	FBgn0039682	FBgn0034576
FBgn0036935	FBgn0024985	FBgn0050290	FBgn0035975	FBgn0030670	FBgn0015277	FBgn0032840	FBgn0033464	FBgn0027570	FBgn0028542	FBgn0004656	FBgn0002921
FBgn0000635	FBgn0033667	FBgn0031981	FBgn0036831	FBgn0034075	FBgn0086450	FBgn0014391	FBgn0039897	FBgn0022023	FBgn0014427	FBgn0033365	FBgn0031534
FBgn0036494	FBgn0037090	FBgn0038912	FBgn0045064	FBgn0037518	FBgn0032683	FBgn0040752	FBgn0034909	FBgn0038651	FBgn0003089	FBgn0004907	FBgn0034913
FBgn0004435	FBgn0051051	FBgn0031263	FBgn0000229	FBgn0031359	FBgn0034649	FBgn0029708	FBgn0035586	FBgn0031900	FBgn0037518	FBgn0250871	FBgn0038912
FBgn0259216	FBgn0051710	FBgn0036556	FBgn0030395	FBgn0039688	FBgn0025454	FBgn0015754	FBgn0052425	FBgn0032363	FBgn0039543	FBgn0036380	FBgn0003134
FBgn0261285	FBgn0050052	FBgn0003134	FBgn0035886	FBgn0053532	FBgn0050290	FBgn0011706	FBgn0030985	FBgn0040773	FBgn0063667	FBgn0035504	FBgn0026562
FBgn0000037	FBgn0037153	FBgn0037231	FBgn0035718	FBgn0015277	FBgn0037679	FBgn0010583	FBgn0016660	FBgn0005671	FBgn0039341	FBgn0034331	FBgn0039628
FBgn0031716	FBgn0033981	FBgn0039628	FBgn0085227	FBgn0086450	FBgn0047114	FBgn0085447	FBgn0030395	FBgn0036205	FBgn0086359	FBgn0261244	FBgn0038105
FBgn0032840	FBgn0035734	FBgn0038105	FBgn0039254	FBgn0032683	FBgn0032377	FBgn0051989	FBgn0010387	FBgn0030749	FBgn0086450	FBgn0051038	FBgn0039031
FBgn0040752	FBgn0036806	FBgn0037265	FBgn0035833	FBgn0034649	FBgn0038830	FBgn0024985	FBgn0085431	FBgn0000559	FBgn0005659	FBgn0016930	FBgn0037265
FBgn0029708	FBgn0023479	FBgn0031053	FBgn0010387	FBgn0005659	FBgn0038912	FBgn0021800	FBgn0040732	FBgn0260971	FBgn0025454	FBgn0027843	FBgn0002985
FBgn0015754	FBgn0036790	FBgn0034605	FBgn0085431	FBgn0034576	FBgn0031263	FBgn0039313	FBgn0034479	FBgn0250871	FBgn0050423	FBgn0250753	FBgn0034605
FBgn0039969	FBgn0259219	FBgn0039048	FBgn0034406	FBgn0002921	FBgn0036556	FBgn0003205	FBgn0051326	FBgn0028968	FBgn0034576	FBgn0003513	FBgn0032884
FBgn0011706	FBgn0031313	FBgn0040230	FBgn0030670	FBgn0050290	FBgn0027607	FBgn0051051	FBgn0034075	FBgn0036380	FBgn0052600	FBgn0015777	FBgn0003890
FBgn0010583	FBgn0000557	FBgn0011202	FBgn0039137	FBgn0038912	FBgn0035043	FBgn0031688	FBgn0039483	FBgn0035504	FBgn0036556	FBgn0002938	FBgn0051999
FBgn0085447	FBgn0040805	FBgn0033799	FBgn0036422	FBgn0031263	FBgn0037231	FBgn0036746	FBgn0028542	FBgn0051038	FBgn0003134	FBgn0259735	FBgn0082582
FBgn0051989	FBgn0038874	FBgn0005771	FBgn0063667	FBgn0036556	FBgn0042083	FBgn0037153	FBgn0003089	FBgn0016930	FBgn0026562	FBgn0015278	FBgn0052055
FBgn0024985	FBgn0016975	FBgn0004583	FBgn0259935	FBgn0003134	FBgn0037265	FBgn0036790	FBgn0036359	FBgn0027843	FBgn0039628	FBgn0040752	FBgn0037817
FBgn0021800	FBgn0034720	FBgn0051999	FBgn0053532	FBgn0035287	FBgn0031998	FBgn0037637	FBgn0029939	FBgn0083949	FBgn0034808	FBgn0051030	FBgn0027930
FBgn0003205	FBgn0043841	FBgn0004057	FBgn0086450	FBgn0035043	FBgn0003890	FBgn0000557	FBgn0031359	FBgn0031995	FBgn0038105	FBgn0027581	FBgn0032726
FBgn0051051	FBgn0031261	FBgn0028394	FBgn0025454	FBgn0037231	FBgn0030638	FBgn0040805	FBgn0039543	FBgn0002938	FBgn0039031	FBgn0042111	FBgn0029881
FBgn0031688	FBgn0036732	FBgn0082582	FBgn0051717	FBgn0038105	FBgn0032330	FBgn0038874	FBgn0063667	FBgn0050456	FBgn0042083	FBgn0259714	FBgn0053329
FBgn0036746	FBgn0036997	FBgn0052055	FBgn0025383	FBgn0037265	FBgn0011202	FBgn0016975	FBgn0039688	FBgn0015010	FBgn0037265	FBgn0259213	FBgn0259171
FBgn0037153	FBgn0024941	FBgn0037817	FBgn0037679	FBgn0002985	FBgn0024997	FBgn0034720	FBgn0259935	FBgn0025684	FBgn0031998	FBgn0050054	FBgn0015033
FBgn0030030	FBgn0029761	FBgn0027930	FBgn0038830	FBgn0034605	FBgn0051999	FBgn0043841	FBgn0039341	FBgn0039150	FBgn0034605	FBgn0037011	FBgn0085380
FBgn0023479	FBgn0027570	FBgn0001323	FBgn0035401	FBgn0003890	FBgn0004057	FBgn0038881	FBgn0086359	FBgn0042111	FBgn0032884	FBgn0038053	FBgn0085399
FBgn0036790	FBgn0039682	FBgn0039902	FBgn0050272	FBgn0039048	FBgn0028394	FBgn0036997	FBgn0086450	FBgn0259714	FBgn0037015	FBgn0031381	FBgn0032252
FBgn0000557	FBgn0029147	FBgn0053329	FBgn0031263	FBgn0011202	FBgn0052055	FBgn0024941	FBgn0032683	FBgn0030668	FBgn0003890	FBgn0035344	FBgn0085282
FBgn0040805	FBgn0004907	FBgn0085377	FBgn0000157	FBgn0033799	FBgn0037817	FBgn0028418	FBgn0005659	FBgn0259213	FBgn0086679	FBgn0004227	FBgn0052446
FBgn0038874	FBgn0260971	FBgn0003866	FBgn0038740	FBgn0005771	FBgn0038756	FBgn0029761	FBgn0025454	FBgn0050054	FBgn0036789	FBgn0032629	FBgn0034885
FBgn0016975	FBgn0250871	FBgn0041111	FBgn0036556	FBgn0051999	FBgn0032052	FBgn0027570	FBgn0024941	FBgn0028562	FBgn0034437	FBgn0250785	FBgn0031432
FBgn0034720	FBgn0036380	FBgn0259171	FBgn0035043	FBgn0041627	FBgn0031520	FBgn0002023	FBgn0000581	FBgn0037011	FBgn0005771	FBgn0003285	FBgn0051436
FBgn0043841	FBgn0035504	FBgn0032803	FBgn0034808	FBgn0004057	FBgn0032726	FBgn0004656	FBgn0034576	FBgn0003371	FBgn0004583	FBgn0050011	FBgn0250910
FBgn0038881	FBgn0034331	FBgn0033476	FBgn0002985	FBgn0028394	FBgn0039902	FBgn0004907	FBgn0033791	FBgn0038053	FBgn0004057	FBgn0004198	FBgn0035397
FBgn0036732	FBgn0261244	FBgn0023001	FBgn0031998	FBgn0020309	FBgn0038734	FBgn0260971	FBgn0000157	FBgn0031381	FBgn0260658	FBgn0041713	FBgn0086680
FBgn0036997	FBgn0051038	FBgn0259098	FBgn0030769	FBgn0037817	FBgn0015872	FBgn0035504	FBgn0034860	FBgn0030581	FBgn0037817	FBgn0037949	FBgn0250789
FBgn0024941	FBgn0016930	FBgn0004396	FBgn0003890	FBgn0001323	FBgn0039789	FBgn0040650	FBgn0036556	FBgn0002626	FBgn0034110	FBgn0035578	FBgn0027945
FBgn0028418	FBgn0027843	FBgn0085380	FBgn0011202	FBgn0042105	FBgn0005640	FBgn0261244	FBgn0035287	FBgn0028746	FBgn0027930	FBgn0011701	FBgn0037727
FBgn0029761	FBgn0032225	FBgn0016672	FBgn0032144	FBgn0033214	FBgn0003866	FBgn0016930	FBgn0026562	FBgn0032629	FBgn0032726	FBgn0033652	FBgn0035165
FBgn0002023	FBgn0039523	FBgn0031745	FBgn0023534	FBgn0038734	FBgn0026630	FBgn0025802	FBgn0039628	FBgn0015571	FBgn0029881	FBgn0003392	FBgn0051427
FBgn0086129	FBgn0003513	FBgn0002577	FBgn0024997	FBgn0023083	FBgn0051380	FBgn0032225	FBgn0038105	FBgn0250785	FBgn0053329	FBgn0026702	FBgn0027280
FBgn0004656	FBgn0015777	FBgn0036741	FBgn0034437	FBgn0015872	FBgn0033476	FBgn0031995	FBgn0039031	FBgn0040319	FBgn0026630	FBgn0031239	FBgn0010053
FBgn0033153	FBgn0002938	FBgn0037515	FBgn0051446	FBgn0030053	FBgn0023001	FBgn0015777	FBgn0037265	FBgn0011766	FBgn0041111	FBgn0030011	FBgn0011296
FBgn0004907	FBgn0033911	FBgn0032252	FBgn0260658	FBgn0033476	FBgn0015033	FBgn0033911	FBgn0034605	FBgn0260793	FBgn0259171	FBgn0051158	FBgn0039927
FBgn0260971	FBgn0040775	FBgn0035251	FBgn0037817	FBgn0259098	FBgn0004396	FBgn0259735	FBgn0039048	FBgn0034138	FBgn0033476	FBgn0031563	FBgn0040718
FBgn0035504	FBgn0051030	FBgn0027790	FBgn0038756	FBgn0031745	FBgn0024183	FBgn0030090	FBgn0085201	FBgn0032171	FBgn0004396	FBgn0003011	FBgn0002772
FBgn0040650	FBgn0000565	FBgn0260659	FBgn0041780	FBgn0031473	FBgn0085399	FBgn0051030	FBgn0031264	FBgn0039737	FBgn0030407	FBgn0038385	FBgn0028327
FBgn0261244	FBgn0003896	FBgn0051436	FBgn0085387	FBgn0037515	FBgn0036741	FBgn0000565	FBgn0034070	FBgn0032074	FBgn0002577	FBgn0033464	FBgn0034636
FBgn0036922	FBgn0023179	FBgn0250910	FBgn0042105	FBgn0027790	FBgn0027528	FBgn0003896	FBgn0004057	FBgn0053054	FBgn0037973	FBgn0035975	FBgn0029994
FBgn0016930	FBgn0038165	FBgn0260866	FBgn0032726	FBgn0034499	FBgn0260659	FBgn0023179	FBgn0260658	FBgn0026702	FBgn0027528	FBgn0085412	FBgn0029710
FBgn0025802	FBgn0031381	FBgn0036282	FBgn0029881	FBgn0034381	FBgn0052446	FBgn0027581	FBgn0052055	FBgn0262582	FBgn0037515	FBgn0003345	FBgn0035811
FBgn0032225	FBgn0035344	FBgn0035470	FBgn0033214	FBgn0051436	FBgn0034381	FBgn0042111	FBgn0037817	FBgn0031239	FBgn0032252	FBgn0032815	FBgn0039844
FBgn0015777	FBgn0004227	FBgn0250789	FBgn0038734	FBgn0036282	FBgn0051436	FBgn0259213	FBgn0027930	FBgn0051158	FBgn0085282	FBgn0030985	FBgn0032407
FBgn0037021	FBgn0032629	FBgn0015569	FBgn0015872	FBgn0035470	FBgn0250910	FBgn0038165	FBgn0085387	FBgn0040726	FBgn0034885	FBgn0000394	FBgn0026179
FBgn0033911	FBgn0250785	FBgn0261260	FBgn0041111	FBgn0250789	FBgn0261260	FBgn0050054	FBgn0032726	FBgn0027556	FBgn0031432	FBgn0000229	FBgn0031860
FBgn0259735	FBgn0003285	FBgn0035165	FBgn0033476	FBgn0015569	FBgn0029791	FBgn0038053	FBgn0039902	FBgn0039648	FBgn0051436	FBgn0040397	FBgn0027657
FBgn0000541	FBgn0050011	FBgn0029791	FBgn0039690	FBgn0261260	FBgn0000473	FBgn0031381	FBgn0053329	FBgn0004638	FBgn0250910	FBgn0039254	FBgn0035767
FBgn0030090	FBgn0041713	FBgn0034517	FBgn0032717	FBgn0029791	FBgn0051427	FBgn0004227	FBgn0003866	FBgn0035975	FBgn0086680	FBgn0034419	FBgn0036623
FBgn0051030	FBgn0037949	FBgn0062412	FBgn0023001	FBgn0034517	FBgn0032509	FBgn0032629	FBgn0041111	FBgn0014020	FBgn0040653	FBgn0052187	FBgn0036765
FBgn0000565	FBgn0035578	FBgn0011656	FBgn0015033	FBgn0000473	FBgn0010053	FBgn0086532	FBgn0259171	FBgn0001247	FBgn0015569	FBgn0030670	FBgn0030893
FBgn0003896	FBgn0011701	FBgn0005666	FBgn0051091	FBgn0051427	FBgn0039927	FBgn0250785	FBgn0032803	FBgn0003345	FBgn0027945	FBgn0020626	FBgn0027343
FBgn0023179	FBgn0033652	FBgn0051427	FBgn0019928	FBgn0010053	FBgn0033494	FBgn0003285	FBgn0033476	FBgn0017578	FBgn0037727	FBgn0051326	FBgn0000083
FBgn0027581	FBgn0003392	FBgn0010053	FBgn0030407	FBgn0011296	FBgn0026619	FBgn0050011	FBgn0040972	FBgn0032643	FBgn0029791	FBgn0039483	FBgn0052687
FBgn0042111	FBgn0026702	FBgn0011296	FBgn0034187	FBgn0259192	FBgn0036927	FBgn0004198	FBgn0015033	FBgn0030395	FBgn0011656	FBgn0028542	FBgn0046113
FBgn0015402	FBgn0030011	FBgn0039927	FBgn0037973	FBgn0040718	FBgn0037487	FBgn0011766	FBgn0259098	FBgn0040397	FBgn0051427	FBgn0044020	FBgn0083972
FBgn0259213	FBgn0031563	FBgn0002772	FBgn0010040	FBgn0002772	FBgn0038391	FBgn0262599	FBgn0004396	FBgn0029912	FBgn0010053	FBgn0038975	FBgn0031461
FBgn0038165	FBgn0051221	FBgn0037487	FBgn0027528	FBgn0033494	FBgn0024945	FBgn0037949	FBgn0051690	FBgn0039254	FBgn0040718	FBgn0001186	FBgn0005631
FBgn0050054	FBgn0003011	FBgn0028991	FBgn0032252	FBgn0029994	FBgn0035811	FBgn0035578	FBgn0085399	FBgn0035833	FBgn0028327	FBgn0037313	FBgn0032596
FBgn0038053	FBgn0038385	FBgn0004644	FBgn0053087	FBgn0028991	FBgn0035010	FBgn0011701	FBgn0037515	FBgn0085431	FBgn0029994	FBgn0031359	FBgn0029765
FBgn0010762	FBgn0033464	FBgn0032702	FBgn0035325	FBgn0004644	FBgn0039821	FBgn0033652	FBgn0032252	FBgn0030954	FBgn0032719	FBgn0039688	FBgn0013576
FBgn0031381	FBgn0034909	FBgn0011211	FBgn0053179	FBgn0026088	FBgn0026179	FBgn0033093	FBgn0027790	FBgn0052187	FBgn0035811	FBgn0032683	FBgn0039073
FBgn0030581	FBgn0035975	FBgn0039821	FBgn0031432	FBgn0036769	FBgn0050016	FBgn0003392	FBgn0085282	FBgn0034479	FBgn0039844	FBgn0005659	FBgn0035044
FBgn0004227	FBgn0085382	FBgn0039844	FBgn0051436	FBgn0035010	FBgn0036461	FBgn0026702	FBgn0034885	FBgn0025720	FBgn0003651	FBgn0050423	FBgn0085466
FBgn0028746	FBgn0030985	FBgn0032407	FBgn0250910	FBgn0039821	FBgn0014133	FBgn0031239	FBgn0031432	FBgn0030670	FBgn0035771	FBgn0034576	FBgn0015790
FBgn0032629	FBgn0000394	FBgn0003651	FBgn0260866	FBgn0032407	FBgn0035767	FBgn0030011	FBgn0051436	FBgn0020626	FBgn0031860	FBgn0002921	FBgn0038243
FBgn0250785	FBgn0000229	FBgn0041789	FBgn0250789	FBgn0026179	FBgn0039266	FBgn0040726	FBgn0250910	FBgn0011708	FBgn0261053	FBgn0002937	FBgn0032005
FBgn0003285	FBgn0035833	FBgn0261053	FBgn0037727	FBgn0041789	FBgn0031522	FBgn0051221	FBgn0033570	FBgn0003089	FBgn0027657	FBgn0026192	FBgn0030511
FBgn0050011	FBgn0011676	FBgn0037841	FBgn0035165	FBgn0053516	FBgn0036765	FBgn0004638	FBgn0086680	FBgn0001186	FBgn0035767	FBgn0038912	FBgn0035445
FBgn0004198	FBgn0085431	FBgn0027657	FBgn0050049	FBgn0027657	FBgn0030893	FBgn0034909	FBgn0040653	FBgn0029939	FBgn0036623	FBgn0032753	FBgn0032618
FBgn0011766	FBgn0039590	FBgn0035767	FBgn0010053	FBgn0035767	FBgn0030797	FBgn0035975	FBgn0015569	FBgn0037518	FBgn0031182	FBgn0259247	FBgn0033669
FBgn0260793	FBgn0052187	FBgn0039266	FBgn0002564	FBgn0036623	FBgn0000083	FBgn0259246	FBgn0261260	FBgn0037313	FBgn0052687	FBgn0037017	FBgn0034179
FBgn0262599	FBgn0030670	FBgn0036765	FBgn0033494	FBgn0036765	FBgn0029118	FBgn0045064	FBgn0027945	FBgn0039688	FBgn0023549	FBgn0035287	FBgn0010225
FBgn0037949	FBgn0051326	FBgn0030590	FBgn0037487	FBgn0030590	FBgn0024361	FBgn0001247	FBgn0037727	FBgn0259935	FBgn0036837	FBgn0038330	FBgn0040726
FBgn0035578	FBgn0039483	FBgn0000083	FBgn0001961	FBgn0027343	FBgn0085443	FBgn0085382	FBgn0029791	FBgn0034230	FBgn0083972	FBgn0037231	FBgn0038914
FBgn0011701	FBgn0028542	FBgn0259209	FBgn0038391	FBgn0000083	FBgn0020440	FBgn0003345	FBgn0034517	FBgn0015277	FBgn0031461	FBgn0026562	FBgn0041094
FBgn0033652	FBgn0038975	FBgn0026160	FBgn0029994	FBgn0026160	FBgn0000317	FBgn0000229	FBgn0005666	FBgn0039341	FBgn0029765	FBgn0039628	FBgn0038878
FBgn0033093	FBgn0036359	FBgn0046113	FBgn0028991	FBgn0040660	FBgn0013576	FBgn0016660	FBgn0000473	FBgn0086450	FBgn0013576	FBgn0038105	FBgn0014135
FBgn0003392	FBgn0001253	FBgn0029118	FBgn0004644	FBgn0046113	FBgn0031974	FBgn0029912	FBgn0051427	FBgn0046687	FBgn0039073	FBgn0005586	FBgn0051431
FBgn0026702	FBgn0039688	FBgn0037753	FBgn0026088	FBgn0029118	FBgn0004910	FBgn0034419	FBgn0030479	FBgn0000581	FBgn0260753	FBgn0052227	FBgn0085413
FBgn0031239	FBgn0086359	FBgn0038854	FBgn0035811	FBgn0024361	FBgn0033982	FBgn0035833	FBgn0010053	FBgn0051717	FBgn0035044	FBgn0035231	FBgn0043012
FBgn0030011	FBgn0086450	FBgn0005631	FBgn0035010	FBgn0033224	FBgn0038243	FBgn0011676	FBgn0011296	FBgn0050423	FBgn0030511	FBgn0034605	FBgn0003231
FBgn0051158	FBgn0032683	FBgn0039203	FBgn0039821	FBgn0085443	FBgn0027550	FBgn0030954	FBgn0040718	FBgn0034576	FBgn0034943	FBgn0003890	FBgn0030183
FBgn0040726	FBgn0025454	FBgn0043792	FBgn0036995	FBgn0039203	FBgn0000542	FBgn0039590	FBgn0031971	FBgn0037679	FBgn0032618	FBgn0039048	FBgn0259221
FBgn0051221	FBgn0002921	FBgn0035348	FBgn0053516	FBgn0035348	FBgn0027582	FBgn0052187	FBgn0002772	FBgn0047114	FBgn0025574	FBgn0051211	FBgn0034511
FBgn0003011	FBgn0052006	FBgn0040817	FBgn0014133	FBgn0028703	FBgn0030511	FBgn0086757	FBgn0033289	FBgn0035152	FBgn0034179	FBgn0030508	FBgn0029831
FBgn0004638	FBgn0002937	FBgn0032422	FBgn0261053	FBgn0040817	FBgn0034943	FBgn0039137	FBgn0028327	FBgn0032377	FBgn0004567	FBgn0040230	FBgn0033079
FBgn0034909	FBgn0026192	FBgn0003660	FBgn0036623	FBgn0032422	FBgn0027569	FBgn0044020	FBgn0031730	FBgn0035401	FBgn0010225	FBgn0033799	FBgn0034968
FBgn0035975	FBgn0038912	FBgn0027660	FBgn0036765	FBgn0051343	FBgn0026314	FBgn0038975	FBgn0032707	FBgn0000157	FBgn0038914	FBgn0023534	FBgn0022774
FBgn0259246	FBgn0032753	FBgn0013576	FBgn0030893	FBgn0003660	FBgn0025574	FBgn0001253	FBgn0029994	FBgn0259247	FBgn0050287	FBgn0024997	FBgn0033128
FBgn0045064	FBgn0034860	FBgn0031914	FBgn0031182	FBgn0031914	FBgn0026061	FBgn0001186	FBgn0259239	FBgn0031725	FBgn0014135	FBgn0005771	FBgn0014018
FBgn0001247	FBgn0031725	FBgn0004910	FBgn0027343	FBgn0004910	FBgn0038720	FBgn0039465	FBgn0011211	FBgn0036556	FBgn0034712	FBgn0003227	FBgn0038072
FBgn0085382	FBgn0035287	FBgn0260753	FBgn0053127	FBgn0260753	FBgn0032922	FBgn0259935	FBgn0035811	FBgn0003134	FBgn0039757	FBgn0030613	FBgn0001105
FBgn0003345	FBgn0038330	FBgn0026077	FBgn0052687	FBgn0038466	FBgn0010225	FBgn0034230	FBgn0035010	FBgn0027607	FBgn0085413	FBgn0034070	FBgn0039156
FBgn0000229	FBgn0026562	FBgn0030576	FBgn0023549	FBgn0026077	FBgn0038088	FBgn0015277	FBgn0039821	FBgn0037265	FBgn0035581	FBgn0032259	FBgn0033679
FBgn0260934	FBgn0039628	FBgn0033982	FBgn0034247	FBgn0033982	FBgn0034716	FBgn0086359	FBgn0036995	FBgn0030769	FBgn0029785	FBgn0082582	FBgn0033428
FBgn0034419	FBgn0038105	FBgn0038243	FBgn0029118	FBgn0038243	FBgn0038718	FBgn0032683	FBgn0039844	FBgn0086693	FBgn0003231	FBgn0020309	FBgn0033683
FBgn0035833	FBgn0039031	FBgn0032593	FBgn0050479	FBgn0034179	FBgn0260934	FBgn0011290	FBgn0043535	FBgn0037015	FBgn0000038	FBgn0052055	FBgn0034638
FBgn0011676	FBgn0005586	FBgn0035445	FBgn0039091	FBgn0026061	FBgn0031682	FBgn0034576	FBgn0003651	FBgn0039048	FBgn0259221	FBgn0260795	FBgn0033232
FBgn0085431	FBgn0052227	FBgn0032618	FBgn0024361	FBgn0038720	FBgn0026150	FBgn0002921	FBgn0031860	FBgn0051211	FBgn0259245	FBgn0038980	FBgn0036165
FBgn0030954	FBgn0035231	FBgn0025866	FBgn0035348	FBgn0015801	FBgn0014135	FBgn0037679	FBgn0041789	FBgn0028717	FBgn0029848	FBgn0027930	FBgn0051915
FBgn0039590	FBgn0034605	FBgn0001112	FBgn0051343	FBgn0038292	FBgn0039325	FBgn0031981	FBgn0261053	FBgn0040230	FBgn0034511	FBgn0036890	FBgn0019890
FBgn0052187	FBgn0086693	FBgn0034179	FBgn0003660	FBgn0040726	FBgn0034712	FBgn0002937	FBgn0027657	FBgn0032330	FBgn0031471	FBgn0031520	FBgn0050035
FBgn0086757	FBgn0039048	FBgn0026061	FBgn0013576	FBgn0041094	FBgn0259734	FBgn0032377	FBgn0035767	FBgn0033799	FBgn0029831	FBgn0024836	FBgn0039800
FBgn0022382	FBgn0030508	FBgn0015801	FBgn0033115	FBgn0260934	FBgn0085413	FBgn0031725	FBgn0036623	FBgn0033635	FBgn0033079	FBgn0029881	FBgn0004368
FBgn0030670	FBgn0040230	FBgn0030634	FBgn0038466	FBgn0014135	FBgn0004574	FBgn0036556	FBgn0039266	FBgn0005771	FBgn0034968	FBgn0053329	FBgn0014865
FBgn0039137	FBgn0033799	FBgn0004567	FBgn0033982	FBgn0259734	FBgn0035581	FBgn0035287	FBgn0031182	FBgn0004583	FBgn0030001	FBgn0250867	FBgn0034398
FBgn0044020	FBgn0023534	FBgn0010225	FBgn0038243	FBgn0023541	FBgn0003231	FBgn0038330	FBgn0000047	FBgn0037185	FBgn0022774	FBgn0039789	FBgn0025814
FBgn0038975	FBgn0005771	FBgn0041094	FBgn0260932	FBgn0085413	FBgn0031760	FBgn0037231	FBgn0259209	FBgn0035422	FBgn0014018	FBgn0027588	FBgn0050410
FBgn0001253	FBgn0003227	FBgn0038878	FBgn0034580	FBgn0031760	FBgn0259221	FBgn0026562	FBgn0023549	FBgn0028394	FBgn0039156	FBgn0259171	FBgn0001137
FBgn0085432	FBgn0030613	FBgn0260934	FBgn0027569	FBgn0259221	FBgn0259245	FBgn0051992	FBgn0046113	FBgn0260658	FBgn0016694	FBgn0033476	FBgn0026319
FBgn0001186	FBgn0034070	FBgn0259734	FBgn0026061	FBgn0259245	FBgn0029848	FBgn0005586	FBgn0036837	FBgn0020309	FBgn0033428	FBgn0003710	FBgn0032770
FBgn0039465	FBgn0260658	FBgn0085413	FBgn0038292	FBgn0029848	FBgn0028491	FBgn0052227	FBgn0083972	FBgn0052055	FBgn0033683	FBgn0086768	FBgn0030237
FBgn0039688	FBgn0020309	FBgn0035581	FBgn0031945	FBgn0032694	FBgn0031471	FBgn0035231	FBgn0031461	FBgn0037817	FBgn0031219	FBgn0030240	FBgn0034405
FBgn0259935	FBgn0052055	FBgn0259221	FBgn0040726	FBgn0031471	FBgn0033079	FBgn0052105	FBgn0085397	FBgn0041780	FBgn0034638	FBgn0016672	FBgn0033340
FBgn0034230	FBgn0037817	FBgn0032694	FBgn0038878	FBgn0261284	FBgn0033128	FBgn0034605	FBgn0029765	FBgn0085387	FBgn0031913	FBgn0030407	FBgn0033135
FBgn0086359	FBgn0260795	FBgn0031471	FBgn0260934	FBgn0036764	FBgn0014018	FBgn0051211	FBgn0040817	FBgn0085382	FBgn0034674	FBgn0032249	FBgn0039564
FBgn0032683	FBgn0038980	FBgn0033079	FBgn0026150	FBgn0033128	FBgn0010638	FBgn0028717	FBgn0032911	FBgn0053519	FBgn0051915	FBgn0051690	FBgn0035383
FBgn0011290	FBgn0027930	FBgn0261284	FBgn0014135	FBgn0014018	FBgn0052107	FBgn0030508	FBgn0032422	FBgn0040285	FBgn0037935	FBgn0003250	FBgn0014469
FBgn0002921	FBgn0041097	FBgn0053558	FBgn0051431	FBgn0052107	FBgn0027356	FBgn0029887	FBgn0031914	FBgn0015872	FBgn0033373	FBgn0036741	FBgn0037275
FBgn0037679	FBgn0036890	FBgn0032943	FBgn0023541	FBgn0027356	FBgn0039156	FBgn0040230	FBgn0030292	FBgn0053329	FBgn0050035	FBgn0027528	FBgn0010548
FBgn0031981	FBgn0008651	FBgn0033128	FBgn0039757	FBgn0033679	FBgn0029833	FBgn0023534	FBgn0085466	FBgn0039789	FBgn0039800	FBgn0037515	FBgn0034364
FBgn0002937	FBgn0001323	FBgn0014018	FBgn0085413	FBgn0016694	FBgn0035825	FBgn0005771	FBgn0027550	FBgn0027588	FBgn0004368	FBgn0027790	FBgn0052280
FBgn0032377	FBgn0031520	FBgn0000097	FBgn0035581	FBgn0002931	FBgn0033659	FBgn0003227	FBgn0000542	FBgn0005640	FBgn0029868	FBgn0020930	FBgn0022787
FBgn0000382	FBgn0032726	FBgn0029720	FBgn0003231	FBgn0010434	FBgn0053094	FBgn0051999	FBgn0034943	FBgn0031315	FBgn0034398	FBgn0053179	FBgn0053296
FBgn0031725	FBgn0024836	FBgn0027356	FBgn0032694	FBgn0002569	FBgn0032731	FBgn0030613	FBgn0032618	FBgn0030053	FBgn0025814	FBgn0085282	FBgn0086758
FBgn0036556	FBgn0029881	FBgn0039156	FBgn0031471	FBgn0031219	FBgn0037935	FBgn0034070	FBgn0034179	FBgn0041111	FBgn0037788	FBgn0034885	FBgn0000633
FBgn0035287	FBgn0053329	FBgn0033679	FBgn0051015	FBgn0053094	FBgn0033761	FBgn0032259	FBgn0015801	FBgn0259171	FBgn0259994	FBgn0027335	FBgn0031417
FBgn0038330	FBgn0039789	FBgn0026255	FBgn0033079	FBgn0050345	FBgn0024958	FBgn0085442	FBgn0020235	FBgn0034372	FBgn0050410	FBgn0051344	FBgn0029167
FBgn0026562	FBgn0010407	FBgn0004514	FBgn0027574	FBgn0036165	FBgn0035587	FBgn0260658	FBgn0004567	FBgn0032717	FBgn0032219	FBgn0031432	FBgn0031373
FBgn0051992	FBgn0259171	FBgn0033428	FBgn0038682	FBgn0027287	FBgn0036493	FBgn0020309	FBgn0010225	FBgn0025678	FBgn0032770	FBgn0051436	FBgn0051092
FBgn0005586	FBgn0032803	FBgn0002441	FBgn0014018	FBgn0035587	FBgn0033373	FBgn0052055	FBgn0038914	FBgn0029785	FBgn0036199	FBgn0260866	FBgn0032136
FBgn0052227	FBgn0040972	FBgn0010434	FBgn0052107	FBgn0036493	FBgn0050035	FBgn0037817	FBgn0050287	FBgn0004396	FBgn0030237	FBgn0250789	FBgn0030013
FBgn0037780	FBgn0015033	FBgn0038735	FBgn0085412	FBgn0050035	FBgn0020378	FBgn0260795	FBgn0032783	FBgn0085380	FBgn0029761	FBgn0261260	FBgn0038256
FBgn0035231	FBgn0003710	FBgn0053094	FBgn0039156	FBgn0040843	FBgn0040238	FBgn0038980	FBgn0038878	FBgn0024689	FBgn0036563	FBgn0029791	FBgn0052573
FBgn0052105	FBgn0259098	FBgn0026570	FBgn0033679	FBgn0032897	FBgn0250757	FBgn0041097	FBgn0037280	FBgn0031745	FBgn0034405	FBgn0011656	FBgn0260442
FBgn0034605	FBgn0085380	FBgn0036165	FBgn0033683	FBgn0004368	FBgn0034398	FBgn0036890	FBgn0085413	FBgn0002577	FBgn0038592	FBgn0033375	FBgn0036875
FBgn0051211	FBgn0016672	FBgn0029930	FBgn0033659	FBgn0020378	FBgn0037217	FBgn0259818	FBgn0003231	FBgn0038318	FBgn0039564	FBgn0051427	FBgn0024814
FBgn0028717	FBgn0030407	FBgn0040843	FBgn0002569	FBgn0259164	FBgn0040153	FBgn0031520	FBgn0017567	FBgn0025393	FBgn0035383	FBgn0030479	FBgn0027929
FBgn0030508	FBgn0032249	FBgn0032897	FBgn0031913	FBgn0040238	FBgn0050410	FBgn0024836	FBgn0014869	FBgn0085399	FBgn0014469	FBgn0010053	FBgn0030160
FBgn0029887	FBgn0051690	FBgn0040238	FBgn0050345	FBgn0034398	FBgn0026315	FBgn0039902	FBgn0016120	FBgn0031473	FBgn0030737	FBgn0250907	FBgn0083949
FBgn0040230	FBgn0003250	FBgn0034398	FBgn0026570	FBgn0025814	FBgn0050371	FBgn0029881	FBgn0034511	FBgn0036741	FBgn0010548	FBgn0039927	FBgn0086687
FBgn0036789	FBgn0085399	FBgn0025643	FBgn0037935	FBgn0025643	FBgn0004919	FBgn0250867	FBgn0031471	FBgn0027790	FBgn0260945	FBgn0023479	FBgn0050106
FBgn0023534	FBgn0031473	FBgn0037721	FBgn0261274	FBgn0037721	FBgn0028577	FBgn0260639	FBgn0038339	FBgn0020930	FBgn0037607	FBgn0040718	FBgn0035791
FBgn0052000	FBgn0037515	FBgn0020278	FBgn0027287	FBgn0259994	FBgn0036563	FBgn0027588	FBgn0029898	FBgn0260659	FBgn0052280	FBgn0031971	FBgn0028990
FBgn0005771	FBgn0027790	FBgn0001137	FBgn0259748	FBgn0001137	FBgn0035674	FBgn0003866	FBgn0035434	FBgn0052446	FBgn0033697	FBgn0033289	FBgn0004852
FBgn0003227	FBgn0020930	FBgn0030163	FBgn0004396	FBgn0026315	FBgn0038592	FBgn0010407	FBgn0030001	FBgn0034885	FBgn0053296	FBgn0038788	FBgn0050046
FBgn0051999	FBgn0053179	FBgn0053970	FBgn0036493	FBgn0053970	FBgn0031800	FBgn0041111	FBgn0022774	FBgn0034381	FBgn0031417	FBgn0033494	FBgn0035438
FBgn0030613	FBgn0085282	FBgn0050371	FBgn0020378	FBgn0035358	FBgn0038504	FBgn0259171	FBgn0038072	FBgn0051163	FBgn0031373	FBgn0031730	FBgn0027578
FBgn0034070	FBgn0034885	FBgn0010350	FBgn0034398	FBgn0026319	FBgn0011232	FBgn0033476	FBgn0259213	FBgn0033060	FBgn0051092	FBgn0036927	FBgn0004606
FBgn0032259	FBgn0051344	FBgn0034405	FBgn0037788	FBgn0032770	FBgn0014469	FBgn0038499	FBgn0039156	FBgn0051436	FBgn0052227	FBgn0001961	FBgn0037553
FBgn0085442	FBgn0031432	FBgn0033340	FBgn0040153	FBgn0029761	FBgn0035906	FBgn0085380	FBgn0033679	FBgn0250910	FBgn0032136	FBgn0032707	FBgn0031418
FBgn0260658	FBgn0051436	FBgn0038592	FBgn0037678	FBgn0063649	FBgn0030737	FBgn0016672	FBgn0026255	FBgn0035397	FBgn0030013	FBgn0029994	FBgn0000576
FBgn0020309	FBgn0250910	FBgn0033135	FBgn0026315	FBgn0036563	FBgn0037875	FBgn0032249	FBgn0033428	FBgn0260866	FBgn0038256	FBgn0259210	FBgn0032029
FBgn0052055	FBgn0040653	FBgn0035199	FBgn0004919	FBgn0034405	FBgn0037607	FBgn0051690	FBgn0010434	FBgn0008635	FBgn0052573	FBgn0028991	FBgn0261283
FBgn0037817	FBgn0015569	FBgn0053109	FBgn0032770	FBgn0035674	FBgn0032451	FBgn0023097	FBgn0031219	FBgn0035470	FBgn0036875	FBgn0032719	FBgn0037749
FBgn0260795	FBgn0037475	FBgn0035636	FBgn0030237	FBgn0033135	FBgn0052280	FBgn0038318	FBgn0034638	FBgn0250789	FBgn0027929	FBgn0026088	FBgn0259822
FBgn0038980	FBgn0027945	FBgn0035383	FBgn0033624	FBgn0039944	FBgn0050269	FBgn0085399	FBgn0031913	FBgn0261260	FBgn0030160	FBgn0030286	FBgn0033170
FBgn0041097	FBgn0037727	FBgn0014469	FBgn0085380	FBgn0085380	FBgn0031902	FBgn0035167	FBgn0039157	FBgn0032640	FBgn0086687	FBgn0036995	FBgn0036892
FBgn0036890	FBgn0029791	FBgn0035906	FBgn0038504	FBgn0035199	FBgn0086371	FBgn0031473	FBgn0050345	FBgn0035165	FBgn0035791	FBgn0029925	FBgn0038376
FBgn0259818	FBgn0034517	FBgn0037275	FBgn0033827	FBgn0014469	FBgn0032957	FBgn0036741	FBgn0036165	FBgn0029791	FBgn0028990	FBgn0039844	FBgn0028331
FBgn0031520	FBgn0011656	FBgn0010548	FBgn0035636	FBgn0037796	FBgn0086758	FBgn0027528	FBgn0037935	FBgn0034517	FBgn0004852	FBgn0030742	FBgn0085446
FBgn0024836	FBgn0000473	FBgn0037796	FBgn0035906	FBgn0052280	FBgn0031417	FBgn0032252	FBgn0039112	FBgn0033375	FBgn0050046	FBgn0014133	FBgn0028689
FBgn0029881	FBgn0051427	FBgn0042206	FBgn0030752	FBgn0028527	FBgn0015714	FBgn0035251	FBgn0066101	FBgn0051427	FBgn0037010	FBgn0037841	FBgn0033321
FBgn0250867	FBgn0010053	FBgn0034058	FBgn0020906	FBgn0000636	FBgn0052573	FBgn0020930	FBgn0029930	FBgn0030479	FBgn0038156	FBgn0039266	FBgn0052529
FBgn0260639	FBgn0039927	FBgn0052280	FBgn0042206	FBgn0036116	FBgn0035421	FBgn0038296	FBgn0083950	FBgn0014029	FBgn0035438	FBgn0030893	FBgn0031561
FBgn0010407	FBgn0040718	FBgn0039908	FBgn0039761	FBgn0034408	FBgn0044826	FBgn0053179	FBgn0036364	FBgn0259192	FBgn0027578	FBgn0030895	FBgn0042693
FBgn0259171	FBgn0031971	FBgn0028527	FBgn0032451	FBgn0031902	FBgn0259984	FBgn0052446	FBgn0035817	FBgn0040718	FBgn0037553	FBgn0036145	FBgn0030662
FBgn0085380	FBgn0033289	FBgn0000636	FBgn0034058	FBgn0015714	FBgn0032449	FBgn0034381	FBgn0050035	FBgn0038967	FBgn0031418	FBgn0052687	FBgn0044011
FBgn0016672	FBgn0034636	FBgn0032957	FBgn0044050	FBgn0029995	FBgn0035791	FBgn0051163	FBgn0039800	FBgn0028327	FBgn0032029	FBgn0026160	FBgn0260747
FBgn0011818	FBgn0031730	FBgn0034242	FBgn0050269	FBgn0033968	FBgn0032720	FBgn0051344	FBgn0004368	FBgn0037487	FBgn0261283	FBgn0036619	FBgn0040582
FBgn0032249	FBgn0036927	FBgn0015714	FBgn0051077	FBgn0030693	FBgn0053054	FBgn0033060	FBgn0020378	FBgn0039212	FBgn0037749	FBgn0037753	FBgn0063491
FBgn0051690	FBgn0037487	FBgn0029995	FBgn0015714	FBgn0052573	FBgn0037553	FBgn0250910	FBgn0014865	FBgn0030990	FBgn0004646	FBgn0083972	FBgn0024234
FBgn0023097	FBgn0032707	FBgn0030013	FBgn0023495	FBgn0003149	FBgn0031418	FBgn0250789	FBgn0029868	FBgn0026088	FBgn0040318	FBgn0039269	FBgn0034985
FBgn0024183	FBgn0029994	FBgn0038256	FBgn0045852	FBgn0013720	FBgn0040350	FBgn0261260	FBgn0040900	FBgn0039584	FBgn0259822	FBgn0005631	FBgn0086906
FBgn0085399	FBgn0259210	FBgn0033968	FBgn0011589	FBgn0030160	FBgn0031320	FBgn0037475	FBgn0025814	FBgn0035010	FBgn0033170	FBgn0030778	FBgn0025712
FBgn0031473	FBgn0004364	FBgn0030693	FBgn0032024	FBgn0040759	FBgn0030955	FBgn0029711	FBgn0025643	FBgn0039821	FBgn0038376	FBgn0250823	FBgn0036759
FBgn0036741	FBgn0259239	FBgn0052573	FBgn0044826	FBgn0034145	FBgn0052179	FBgn0034517	FBgn0037788	FBgn0036995	FBgn0037537	FBgn0028703	FBgn0036126
FBgn0020930	FBgn0032719	FBgn0003149	FBgn0001316	FBgn0036726	FBgn0040318	FBgn0011656	FBgn0001137	FBgn0026179	FBgn0027835	FBgn0040817	FBgn0040942
FBgn0038296	FBgn0035010	FBgn0051202	FBgn0083949	FBgn0050106	FBgn0063499	FBgn0051427	FBgn0030163	FBgn0020618	FBgn0039537	FBgn0032911	FBgn0039776
FBgn0053179	FBgn0039821	FBgn0013720	FBgn0032449	FBgn0028990	FBgn0036570	FBgn0030479	FBgn0032266	FBgn0052311	FBgn0031752	FBgn0036505	FBgn0259243
FBgn0034381	FBgn0036995	FBgn0260442	FBgn0035791	FBgn0004852	FBgn0013771	FBgn0039927	FBgn0002922	FBgn0035771	FBgn0033321	FBgn0013576	FBgn0030114
FBgn0051163	FBgn0039844	FBgn0259685	FBgn0051632	FBgn0037433	FBgn0033170	FBgn0023479	FBgn0035756	FBgn0036461	FBgn0052529	FBgn0250910	FBgn0030334
FBgn0051344	FBgn0030588	FBgn0030160	FBgn0031418	FBgn0030955	FBgn0036892	FBgn0031971	FBgn0032770	FBgn0041789	FBgn0031561	FBgn0051619	FBgn0032613
FBgn0250910	FBgn0036835	FBgn0034145	FBgn0051956	FBgn0052179	FBgn0028532	FBgn0038788	FBgn0030237	FBgn0261053	FBgn0042693	FBgn0260753	FBgn0025680
FBgn0250789	FBgn0031860	FBgn0028990	FBgn0030955	FBgn0259822	FBgn0038376	FBgn0010303	FBgn0063649	FBgn0036623	FBgn0029959	FBgn0026077	FBgn0039856
FBgn0261260	FBgn0030742	FBgn0037433	FBgn0040318	FBgn0013771	FBgn0259219	FBgn0033494	FBgn0034405	FBgn0039266	FBgn0035107	FBgn0037950	FBgn0033465
FBgn0037475	FBgn0027657	FBgn0035438	FBgn0013771	FBgn0033170	FBgn0024150	FBgn0034636	FBgn0038592	FBgn0036765	FBgn0039509	FBgn0030576	FBgn0035023
FBgn0029711	FBgn0027111	FBgn0004606	FBgn0052379	FBgn0039415	FBgn0025373	FBgn0031730	FBgn0033135	FBgn0036145	FBgn0039155	FBgn0027550	FBgn0003651
FBgn0029791	FBgn0030895	FBgn0261283	FBgn0028532	FBgn0028397	FBgn0040257	FBgn0027499	FBgn0085380	FBgn0030797	FBgn0030662	FBgn0035120	FBgn0031453
FBgn0028504	FBgn0036145	FBgn0040318	FBgn0032167	FBgn0011656	FBgn0028331	FBgn0026619	FBgn0053109	FBgn0030590	FBgn0050424	FBgn0000542	FBgn0038449
FBgn0034517	FBgn0000083	FBgn0259822	FBgn0025373	FBgn0029863	FBgn0033720	FBgn0036927	FBgn0051973	FBgn0039357	FBgn0044011	FBgn0035205	FBgn0031717
FBgn0011656	FBgn0036619	FBgn0010238	FBgn0038790	FBgn0032167	FBgn0025836	FBgn0001961	FBgn0039564	FBgn0000083	FBgn0260747	FBgn0004102	FBgn0025615
FBgn0051427	FBgn0083972	FBgn0013771	FBgn0040257	FBgn0037537	FBgn0052529	FBgn0028991	FBgn0035383	FBgn0036141	FBgn0040582	FBgn0034943	FBgn0003392
FBgn0024732	FBgn0031461	FBgn0033170	FBgn0033720	FBgn0024150	FBgn0042693	FBgn0259239	FBgn0014469	FBgn0052687	FBgn0261260	FBgn0035445	FBgn0259736
FBgn0030479	FBgn0005631	FBgn0031277	FBgn0025836	FBgn0025373	FBgn0039492	FBgn0032719	FBgn0037275	FBgn0038282	FBgn0063491	FBgn0032618	FBgn0036745
FBgn0039927	FBgn0030778	FBgn0029863	FBgn0052529	FBgn0039537	FBgn0039509	FBgn0029710	FBgn0030737	FBgn0085397	FBgn0034786	FBgn0025574	FBgn0030310
FBgn0031971	FBgn0029765	FBgn0262562	FBgn0032935	FBgn0033720	FBgn0000109	FBgn0039584	FBgn0041711	FBgn0020440	FBgn0036759	FBgn0034179	FBgn0052698
FBgn0033494	FBgn0028703	FBgn0032167	FBgn0024315	FBgn0085446	FBgn0024315	FBgn0035010	FBgn0010548	FBgn0036290	FBgn0037766	FBgn0028938	FBgn0017482
FBgn0034636	FBgn0040817	FBgn0037537	FBgn0030662	FBgn0033321	FBgn0050424	FBgn0030286	FBgn0037607	FBgn0032422	FBgn0040942	FBgn0015801	FBgn0030886
FBgn0027499	FBgn0032911	FBgn0024150	FBgn0052483	FBgn0052529	FBgn0037490	FBgn0039844	FBgn0034364	FBgn0003660	FBgn0039776	FBgn0036787	FBgn0033820
FBgn0026619	FBgn0032422	FBgn0025373	FBgn0050424	FBgn0031561	FBgn0035000	FBgn0026179	FBgn0053512	FBgn0085424	FBgn0032613	FBgn0037913	FBgn0019830
FBgn0036927	FBgn0260657	FBgn0039537	FBgn0039637	FBgn0042693	FBgn0039637	FBgn0036835	FBgn0259150	FBgn0027660	FBgn0025680	FBgn0260499	FBgn0028940
FBgn0028991	FBgn0031914	FBgn0028331	FBgn0046689	FBgn0024315	FBgn0046689	FBgn0030742	FBgn0052280	FBgn0013576	FBgn0033497	FBgn0030634	FBgn0039419
FBgn0259239	FBgn0051619	FBgn0085446	FBgn0050022	FBgn0030662	FBgn0050022	FBgn0053516	FBgn0001216	FBgn0051619	FBgn0039856	FBgn0032732	FBgn0029939
FBgn0032719	FBgn0004910	FBgn0033321	FBgn0053181	FBgn0031737	FBgn0033437	FBgn0037841	FBgn0034408	FBgn0004910	FBgn0033465	FBgn0004567	FBgn0036663
FBgn0029710	FBgn0260753	FBgn0052529	FBgn0032923	FBgn0046689	FBgn0260959	FBgn0027111	FBgn0031902	FBgn0030292	FBgn0038449	FBgn0010225	FBgn0001125
FBgn0035010	FBgn0020277	FBgn0032935	FBgn0038481	FBgn0044011	FBgn0034736	FBgn0030895	FBgn0053296	FBgn0032485	FBgn0031717	FBgn0030571	FBgn0036278
FBgn0030286	FBgn0026077	FBgn0042693	FBgn0037186	FBgn0260747	FBgn0004512	FBgn0036145	FBgn0031417	FBgn0030576	FBgn0031957	FBgn0038914	FBgn0037386
FBgn0036995	FBgn0085466	FBgn0030662	FBgn0040336	FBgn0003301	FBgn0036759	FBgn0039357	FBgn0030853	FBgn0015790	FBgn0032940	FBgn0038878	FBgn0037443
FBgn0039844	FBgn0037950	FBgn0031737	FBgn0033437	FBgn0000411	FBgn0030114	FBgn0034938	FBgn0029167	FBgn0000542	FBgn0036745	FBgn0033973	FBgn0020386
FBgn0032407	FBgn0030576	FBgn0050022	FBgn0051267	FBgn0038481	FBgn0025680	FBgn0026160	FBgn0031373	FBgn0039681	FBgn0030310	FBgn0260934	FBgn0031558
FBgn0026179	FBgn0027550	FBgn0003301	FBgn0034736	FBgn0033437	FBgn0034490	FBgn0010235	FBgn0051092	FBgn0027582	FBgn0052698	FBgn0019968	FBgn0031908
FBgn0036835	FBgn0004102	FBgn0030669	FBgn0063491	FBgn0051267	FBgn0039856	FBgn0038282	FBgn0034322	FBgn0039713	FBgn0026869	FBgn0024987	FBgn0002719
FBgn0030742	FBgn0034943	FBgn0012051	FBgn0004512	FBgn0034736	FBgn0083963	FBgn0037753	FBgn0032136	FBgn0004102	FBgn0017482	FBgn0035016	FBgn0029990
FBgn0053516	FBgn0035445	FBgn0034736	FBgn0085422	FBgn0024234	FBgn0036553	FBgn0083972	FBgn0029995	FBgn0030511	FBgn0038878	FBgn0069973	FBgn0026576
FBgn0032391	FBgn0032618	FBgn0024234	FBgn0037870	FBgn0004512	FBgn0031717	FBgn0039269	FBgn0038256	FBgn0023170	FBgn0085414	FBgn0259734	FBgn0003255
FBgn0037841	FBgn0026314	FBgn0085422	FBgn0036759	FBgn0034985	FBgn0039050	FBgn0005631	FBgn0052573	FBgn0025866	FBgn0031397	FBgn0051431	FBgn0032358
FBgn0027111	FBgn0025574	FBgn0086604	FBgn0040942	FBgn0036759	FBgn0039928	FBgn0030778	FBgn0003149	FBgn0034179	FBgn0002778	FBgn0085413	FBgn0043806
FBgn0030895	FBgn0034179	FBgn0034985	FBgn0034490	FBgn0039776	FBgn0032940	FBgn0020440	FBgn0051202	FBgn0004567	FBgn0032684	FBgn0004574	FBgn0032350
FBgn0029976	FBgn0015801	FBgn0037877	FBgn0033497	FBgn0025680	FBgn0030310	FBgn0003741	FBgn0036875	FBgn0038088	FBgn0039645	FBgn0035581	FBgn0003507
FBgn0036145	FBgn0036787	FBgn0086906	FBgn0085481	FBgn0034490	FBgn0038302	FBgn0028703	FBgn0039485	FBgn0038397	FBgn0033820	FBgn0030556	FBgn0033886
FBgn0030590	FBgn0260499	FBgn0020521	FBgn0004369	FBgn0034266	FBgn0026869	FBgn0032911	FBgn0027929	FBgn0028683	FBgn0033915	FBgn0011642	FBgn0025800
FBgn0039357	FBgn0030634	FBgn0259680	FBgn0085317	FBgn0003651	FBgn0017482	FBgn0260657	FBgn0052121	FBgn0014135	FBgn0039339	FBgn0036926	FBgn0026313
FBgn0034938	FBgn0004567	FBgn0036759	FBgn0031717	FBgn0036553	FBgn0034262	FBgn0261276	FBgn0030160	FBgn0024987	FBgn0019830	FBgn0000038	FBgn0032652
FBgn0026160	FBgn0010225	FBgn0036126	FBgn0039941	FBgn0085317	FBgn0002778	FBgn0013576	FBgn0040759	FBgn0069973	FBgn0028940	FBgn0030183	FBgn0013469
FBgn0010235	FBgn0031945	FBgn0039776	FBgn0038302	FBgn0039928	FBgn0032684	FBgn0003598	FBgn0036726	FBgn0051431	FBgn0037298	FBgn0259221	FBgn0040001
FBgn0038282	FBgn0038088	FBgn0030114	FBgn0026869	FBgn0035888	FBgn0004509	FBgn0051619	FBgn0035791	FBgn0039757	FBgn0243486	FBgn0259245	FBgn0031069
FBgn0083972	FBgn0038397	FBgn0025680	FBgn0017482	FBgn0259736	FBgn0037408	FBgn0004910	FBgn0028990	FBgn0085413	FBgn0027951	FBgn0260793	FBgn0030362
FBgn0039269	FBgn0038343	FBgn0026376	FBgn0033434	FBgn0060296	FBgn0034971	FBgn0032485	FBgn0004852	FBgn0030556	FBgn0001125	FBgn0015622	FBgn0033483
FBgn0085397	FBgn0038914	FBgn0033497	FBgn0003396	FBgn0037409	FBgn0030688	FBgn0037950	FBgn0050046	FBgn0000038	FBgn0036278	FBgn0028879	FBgn0036485
FBgn0005631	FBgn0050287	FBgn0260964	FBgn0039645	FBgn0026869	FBgn0025641	FBgn0032348	FBgn0031942	FBgn0031760	FBgn0037443	FBgn0034968	FBgn0036891
FBgn0030778	FBgn0038878	FBgn0034266	FBgn0039339	FBgn0017482	FBgn0002069	FBgn0032223	FBgn0038156	FBgn0014869	FBgn0020386	FBgn0261284	FBgn0086686
FBgn0020440	FBgn0033973	FBgn0033465	FBgn0037408	FBgn0030886	FBgn0035204	FBgn0038243	FBgn0053054	FBgn0259221	FBgn0031558	FBgn0035434	FBgn0017558
FBgn0003741	FBgn0036022	FBgn0030914	FBgn0028894	FBgn0032601	FBgn0039419	FBgn0027550	FBgn0037433	FBgn0037705	FBgn0002719	FBgn0032943	FBgn0032864
FBgn0028703	FBgn0019968	FBgn0083963	FBgn0034971	FBgn0034262	FBgn0028978	FBgn0035205	FBgn0035438	FBgn0259245	FBgn0026576	FBgn0030001	FBgn0034543
FBgn0032911	FBgn0039325	FBgn0036553	FBgn0030688	FBgn0032684	FBgn0001223	FBgn0004102	FBgn0027578	FBgn0015622	FBgn0003255	FBgn0038072	FBgn0036094
FBgn0260657	FBgn0037280	FBgn0031717	FBgn0028940	FBgn0004509	FBgn0037016	FBgn0030511	FBgn0037553	FBgn0032694	FBgn0038087	FBgn0011279	FBgn0020762
FBgn0013576	FBgn0069973	FBgn0039928	FBgn0035756	FBgn0034971	FBgn0028970	FBgn0035445	FBgn0031418	FBgn0031471	FBgn0000052	FBgn0001105	FBgn0031100
FBgn0003598	FBgn0085413	FBgn0259736	FBgn0243486	FBgn0028940	FBgn0034031	FBgn0025866	FBgn0000576	FBgn0053558	FBgn0032358	FBgn0029720	FBgn0026721
FBgn0051619	FBgn0004574	FBgn0060296	FBgn0002069	FBgn0037298	FBgn0002719	FBgn0026314	FBgn0032029	FBgn0030001	FBgn0043806	FBgn0016694	FBgn0025595
FBgn0004910	FBgn0036926	FBgn0030976	FBgn0031906	FBgn0033983	FBgn0035848	FBgn0039634	FBgn0261283	FBgn0038682	FBgn0032350	FBgn0000577	FBgn0039500
FBgn0032485	FBgn0000038	FBgn0037409	FBgn0033983	FBgn0028978	FBgn0032805	FBgn0025574	FBgn0037749	FBgn0260441	FBgn0003507	FBgn0005672	FBgn0050497
FBgn0030058	FBgn0031760	FBgn0026869	FBgn0039419	FBgn0036663	FBgn0259979	FBgn0030289	FBgn0040318	FBgn0033128	FBgn0069242	FBgn0038735	FBgn0032614
FBgn0037950	FBgn0259221	FBgn0017482	FBgn0034642	FBgn0037016	FBgn0039848	FBgn0260499	FBgn0259822	FBgn0010638	FBgn0037207	FBgn0034638	FBgn0259227
FBgn0032348	FBgn0259245	FBgn0030886	FBgn0035661	FBgn0034031	FBgn0032850	FBgn0030634	FBgn0039737	FBgn0038072	FBgn0020660	FBgn0053094	FBgn0027537
FBgn0027550	FBgn0260793	FBgn0033087	FBgn0037386	FBgn0031908	FBgn0069242	FBgn0004567	FBgn0033170	FBgn0002931	FBgn0036660	FBgn0250839	FBgn0042138
FBgn0035205	FBgn0034511	FBgn0032601	FBgn0028970	FBgn0001320	FBgn0039790	FBgn0030571	FBgn0036892	FBgn0033428	FBgn0034494	FBgn0041150	FBgn0038680
FBgn0004102	FBgn0031471	FBgn0033434	FBgn0034031	FBgn0259170	FBgn0020660	FBgn0031945	FBgn0031277	FBgn0035825	FBgn0040918	FBgn0036165	FBgn0038166
FBgn0035445	FBgn0029898	FBgn0032178	FBgn0028945	FBgn0014073	FBgn0025800	FBgn0034716	FBgn0038376	FBgn0002441	FBgn0025800	FBgn0032731	FBgn0038211
FBgn0026314	FBgn0028879	FBgn0039339	FBgn0043575	FBgn0043806	FBgn0038237	FBgn0038343	FBgn0039537	FBgn0005672	FBgn0030049	FBgn0037935	FBgn0033872
FBgn0039634	FBgn0034968	FBgn0037408	FBgn0032805	FBgn0000163	FBgn0023169	FBgn0028507	FBgn0031752	FBgn0002022	FBgn0038237	FBgn0039112	FBgn0052103
FBgn0025574	FBgn0004607	FBgn0034971	FBgn0032067	FBgn0037315	FBgn0032075	FBgn0033973	FBgn0085446	FBgn0033683	FBgn0032652	FBgn0261041	FBgn0035236
FBgn0260499	FBgn0035434	FBgn0037298	FBgn0036833	FBgn0037207	FBgn0027654	FBgn0260934	FBgn0033321	FBgn0026404	FBgn0013469	FBgn0029930	FBgn0037447
FBgn0030634	FBgn0032943	FBgn0243486	FBgn0020508	FBgn0000414	FBgn0028538	FBgn0019968	FBgn0031561	FBgn0002781	FBgn0040001	FBgn0024958	FBgn0011828
FBgn0004567	FBgn0030001	FBgn0031906	FBgn0034160	FBgn0051547	FBgn0044419	FBgn0035016	FBgn0042693	FBgn0031219	FBgn0027654	FBgn0019890	FBgn0040349
FBgn0030571	FBgn0038072	FBgn0033983	FBgn0020660	FBgn0015519	FBgn0039756	FBgn0039254	FBgn0030662	FBgn0085408	FBgn0031069	FBgn0039800	FBgn0035452
FBgn0031945	FBgn0011279	FBgn0039419	FBgn0040918	FBgn0020660	FBgn0037671	FBgn0000578	FBgn0031737	FBgn0026570	FBgn0030362	FBgn0004368	FBgn0005670
FBgn0038343	FBgn0029720	FBgn0036663	FBgn0039472	FBgn0025800	FBgn0037712	FBgn0085413	FBgn0086655	FBgn0032731	FBgn0036891	FBgn0020378	FBgn0000250
FBgn0033973	FBgn0035179	FBgn0037386	FBgn0030837	FBgn0038237	FBgn0038716	FBgn0004574	FBgn0035000	FBgn0261274	FBgn0036316	FBgn0002781	FBgn0004652
FBgn0052767	FBgn0016694	FBgn0031908	FBgn0039620	FBgn0039620	FBgn0042104	FBgn0043012	FBgn0044011	FBgn0033761	FBgn0002774	FBgn0014865	FBgn0063923
FBgn0019968	FBgn0004514	FBgn0002719	FBgn0032075	FBgn0032075	FBgn0035094	FBgn0011642	FBgn0036910	FBgn0032305	FBgn0017558	FBgn0000181	FBgn0024366
FBgn0024987	FBgn0005672	FBgn0001320	FBgn0027654	FBgn0027654	FBgn0033483	FBgn0036926	FBgn0260747	FBgn0032400	FBgn0032864	FBgn0029868	FBgn0085408
FBgn0035016	FBgn0010434	FBgn0014073	FBgn0039769	FBgn0044419	FBgn0017558	FBgn0000038	FBgn0052282	FBgn0083950	FBgn0034328	FBgn0040900	FBgn0062413
FBgn0039254	FBgn0034638	FBgn0038087	FBgn0039756	FBgn0029095	FBgn0031317	FBgn0031760	FBgn0040582	FBgn0027287	FBgn0020762	FBgn0037217	FBgn0035298
FBgn0052758	FBgn0039157	FBgn0032358	FBgn0037671	FBgn0039756	FBgn0000241	FBgn0259221	FBgn0032772	FBgn0035587	FBgn0026721	FBgn0025814	FBgn0038704
FBgn0000578	FBgn0250839	FBgn0000163	FBgn0031069	FBgn0037671	FBgn0051821	FBgn0259245	FBgn0028527	FBgn0036493	FBgn0036260	FBgn0037721	FBgn0003118
FBgn0085413	FBgn0041150	FBgn0053147	FBgn0042104	FBgn0031069	FBgn0038972	FBgn0260793	FBgn0063491	FBgn0032897	FBgn0025595	FBgn0259994	FBgn0004369
FBgn0004574	FBgn0036165	FBgn0037315	FBgn0035094	FBgn0035228	FBgn0031100	FBgn0031187	FBgn0085422	FBgn0020378	FBgn0037376	FBgn0040153	FBgn0037513
FBgn0043012	FBgn0037935	FBgn0000414	FBgn0038199	FBgn0035094	FBgn0031356	FBgn0031471	FBgn0086604	FBgn0000181	FBgn0050497	FBgn0030163	FBgn0020258
FBgn0030556	FBgn0052726	FBgn0051547	FBgn0038404	FBgn0033483	FBgn0034883	FBgn0028879	FBgn0034985	FBgn0029868	FBgn0250908	FBgn0032266	FBgn0027073
FBgn0011642	FBgn0261041	FBgn0020660	FBgn0030569	FBgn0031080	FBgn0038654	FBgn0034968	FBgn0086906	FBgn0034398	FBgn0032614	FBgn0086358	FBgn0032322
FBgn0036926	FBgn0029930	FBgn0034494	FBgn0052473	FBgn0038199	FBgn0035356	FBgn0004607	FBgn0259680	FBgn0037217	FBgn0052666	FBgn0010350	FBgn0003463
FBgn0000038	FBgn0083950	FBgn0025800	FBgn0036738	FBgn0052473	FBgn0032614	FBgn0032943	FBgn0025712	FBgn0020278	FBgn0029736	FBgn0038632	FBgn0001187
FBgn0031760	FBgn0032897	FBgn0039620	FBgn0031317	FBgn0017558	FBgn0038719	FBgn0010309	FBgn0036759	FBgn0040153	FBgn0042138	FBgn0030237	FBgn0000299
FBgn0259221	FBgn0039800	FBgn0032075	FBgn0028920	FBgn0051821	FBgn0033234	FBgn0038490	FBgn0030334	FBgn0032997	FBgn0038211	FBgn0034433	FBgn0035192
FBgn0259245	FBgn0020378	FBgn0027654	FBgn0034543	FBgn0038972	FBgn0038680	FBgn0003559	FBgn0032613	FBgn0024182	FBgn0038829	FBgn0034405	FBgn0032480
FBgn0031187	FBgn0014865	FBgn0035917	FBgn0051821	FBgn0039131	FBgn0037000	FBgn0001105	FBgn0025680	FBgn0039451	FBgn0052103	FBgn0033340	FBgn0033204
FBgn0028879	FBgn0025814	FBgn0044419	FBgn0038972	FBgn0031356	FBgn0051116	FBgn0029720	FBgn0036155	FBgn0086358	FBgn0011828	FBgn0038592	FBgn0039277
FBgn0034968	FBgn0025643	FBgn0029095	FBgn0033733	FBgn0261269	FBgn0040010	FBgn0027356	FBgn0033497	FBgn0031414	FBgn0040349	FBgn0035199	FBgn0038981
FBgn0004607	FBgn0037721	FBgn0039756	FBgn0031356	FBgn0039500	FBgn0003328	FBgn0035179	FBgn0260964	FBgn0050371	FBgn0039925	FBgn0031800	FBgn0040102
FBgn0032633	FBgn0037788	FBgn0031069	FBgn0028950	FBgn0250908	FBgn0052103	FBgn0034009	FBgn0039856	FBgn0004919	FBgn0005670	FBgn0038504	FBgn0004169
FBgn0032943	FBgn0259994	FBgn0037712	FBgn0037376	FBgn0086254	FBgn0011828	FBgn0016694	FBgn0034266	FBgn0250838	FBgn0000721	FBgn0052264	FBgn0051370
FBgn0010309	FBgn0030163	FBgn0028546	FBgn0034883	FBgn0259227	FBgn0040349	FBgn0004514	FBgn0033465	FBgn0035756	FBgn0024366	FBgn0039900	FBgn0086676
FBgn0038490	FBgn0053970	FBgn0033483	FBgn0032120	FBgn0033234	FBgn0032130	FBgn0000577	FBgn0035023	FBgn0063649	FBgn0035298	FBgn0053635	FBgn0002869
FBgn0003559	FBgn0032266	FBgn0030569	FBgn0035356	FBgn0037541	FBgn0039925	FBgn0005672	FBgn0037816	FBgn0038325	FBgn0038704	FBgn0003249	FBgn0037007
FBgn0001105	FBgn0010350	FBgn0051626	FBgn0035264	FBgn0038680	FBgn0029131	FBgn0010434	FBgn0030914	FBgn0033624	FBgn0004611	FBgn0051973	FBgn0261262
FBgn0029720	FBgn0004919	FBgn0016696	FBgn0250908	FBgn0051116	FBgn0085408	FBgn0038735	FBgn0038449	FBgn0086472	FBgn0037513	FBgn0035906	FBgn0032394
FBgn0027356	FBgn0032770	FBgn0017558	FBgn0027109	FBgn0040262	FBgn0035298	FBgn0026404	FBgn0031717	FBgn0033340	FBgn0051774	FBgn0028862	FBgn0053207
FBgn0035179	FBgn0030237	FBgn0051821	FBgn0259227	FBgn0037447	FBgn0035933	FBgn0034638	FBgn0003002	FBgn0038592	FBgn0020258	FBgn0037796	FBgn0010482
FBgn0034009	FBgn0034433	FBgn0032362	FBgn0035670	FBgn0011828	FBgn0037166	FBgn0011818	FBgn0259736	FBgn0039944	FBgn0038290	FBgn0037902	FBgn0028936
FBgn0016694	FBgn0034405	FBgn0040754	FBgn0033234	FBgn0035452	FBgn0038321	FBgn0023407	FBgn0030976	FBgn0031568	FBgn0027073	FBgn0034364	FBgn0051374
FBgn0004514	FBgn0038592	FBgn0031356	FBgn0042138	FBgn0039925	FBgn0261239	FBgn0041150	FBgn0030310	FBgn0053109	FBgn0032322	FBgn0052544	FBgn0037643
FBgn0005672	FBgn0033135	FBgn0261269	FBgn0038680	FBgn0034420	FBgn0033221	FBgn0036165	FBgn0052698	FBgn0053635	FBgn0029067	FBgn0037736	FBgn0026869
FBgn0010434	FBgn0031800	FBgn0039500	FBgn0040299	FBgn0000250	FBgn0004611	FBgn0032731	FBgn0026869	FBgn0011232	FBgn0033791	FBgn0032451	FBgn0005536
FBgn0038735	FBgn0038504	FBgn0005648	FBgn0015797	FBgn0035298	FBgn0032224	FBgn0037935	FBgn0017482	FBgn0051973	FBgn0001187	FBgn0052280	FBgn0085426
FBgn0034638	FBgn0004516	FBgn0032614	FBgn0003328	FBgn0028563	FBgn0023526	FBgn0032305	FBgn0032601	FBgn0004055	FBgn0000299	FBgn0034766	FBgn0002789
FBgn0039157	FBgn0039900	FBgn0259227	FBgn0026371	FBgn0037166	FBgn0037513	FBgn0261041	FBgn0031397	FBgn0037796	FBgn0034387	FBgn0039908	FBgn0001114
FBgn0250839	FBgn0003249	FBgn0042138	FBgn0039510	FBgn0010397	FBgn0037603	FBgn0029930	FBgn0032684	FBgn0037875	FBgn0030640	FBgn0028527	FBgn0031184
FBgn0023407	FBgn0035636	FBgn0038211	FBgn0040262	FBgn0051028	FBgn0027073	FBgn0024958	FBgn0032536	FBgn0001092	FBgn0032480	FBgn0022787	FBgn0032055
FBgn0041150	FBgn0039564	FBgn0033872	FBgn0011828	FBgn0261239	FBgn0037305	FBgn0019890	FBgn0033820	FBgn0053512	FBgn0033204	FBgn0034408	FBgn0039023
FBgn0036165	FBgn0004055	FBgn0026371	FBgn0040349	FBgn0004611	FBgn0052000	FBgn0032078	FBgn0032178	FBgn0052280	FBgn0051370	FBgn0031902	FBgn0039239
FBgn0032731	FBgn0014469	FBgn0037447	FBgn0035452	FBgn0000490	FBgn0042213	FBgn0004368	FBgn0019830	FBgn0050361	FBgn0086676	FBgn0035237	FBgn0039674
FBgn0032305	FBgn0041711	FBgn0085404	FBgn0035663	FBgn0037513	FBgn0036288	FBgn0020378	FBgn0028940	FBgn0028527	FBgn0259699	FBgn0032957	FBgn0037487
FBgn0261041	FBgn0051646	FBgn0011828	FBgn0005670	FBgn0038750	FBgn0001187	FBgn0010473	FBgn0037298	FBgn0022787	FBgn0037295	FBgn0086758	FBgn0028496
FBgn0029930	FBgn0010548	FBgn0035452	FBgn0031033	FBgn0052054	FBgn0085376	FBgn0002781	FBgn0243486	FBgn0003279	FBgn0026598	FBgn0000633	FBgn0004620
FBgn0024958	FBgn0037902	FBgn0032130	FBgn0085408	FBgn0039527	FBgn0025109	FBgn0015371	FBgn0039419	FBgn0034242	FBgn0037007	FBgn0029995	FBgn0037218
FBgn0019890	FBgn0034364	FBgn0034420	FBgn0037166	FBgn0036716	FBgn0029091	FBgn0037788	FBgn0027951	FBgn0044030	FBgn0039523	FBgn0030693	FBgn0037906
FBgn0001134	FBgn0259150	FBgn0000250	FBgn0261239	FBgn0038032	FBgn0033204	FBgn0020278	FBgn0033629	FBgn0052227	FBgn0032394	FBgn0052573	FBgn0003371
FBgn0004368	FBgn0052544	FBgn0041342	FBgn0033221	FBgn0036288	FBgn0038353	FBgn0259994	FBgn0036278	FBgn0040823	FBgn0028936	FBgn0259685	FBgn0014411
FBgn0020378	FBgn0037736	FBgn0085408	FBgn0003118	FBgn0033739	FBgn0034390	FBgn0024182	FBgn0037386	FBgn0259146	FBgn0037643	FBgn0031866	FBgn0028526
FBgn0010473	FBgn0050361	FBgn0010397	FBgn0031414	FBgn0003463	FBgn0038981	FBgn0038816	FBgn0031558	FBgn0030693	FBgn0001114	FBgn0052206	FBgn0003462
FBgn0015371	FBgn0034766	FBgn0051028	FBgn0033124	FBgn0029508	FBgn0035232	FBgn0037466	FBgn0031908	FBgn0052573	FBgn0031184	FBgn0027929	FBgn0250746
FBgn0000181	FBgn0044050	FBgn0261239	FBgn0052054	FBgn0034387	FBgn0259699	FBgn0010350	FBgn0002719	FBgn0051202	FBgn0002723	FBgn0030160	FBgn0035519
FBgn0040900	FBgn0039908	FBgn0004611	FBgn0028394	FBgn0035192	FBgn0000659	FBgn0004919	FBgn0029990	FBgn0013720	FBgn0032055	FBgn0035791	FBgn0026787
FBgn0037788	FBgn0036116	FBgn0003118	FBgn0036288	FBgn0045759	FBgn0035528	FBgn0028577	FBgn0259170	FBgn0259685	FBgn0039023	FBgn0028990	FBgn0024326
FBgn0259994	FBgn0034408	FBgn0004369	FBgn0037563	FBgn0085376	FBgn0031517	FBgn0035756	FBgn0026576	FBgn0036875	FBgn0039239	FBgn0031942	FBgn0033133
FBgn0024182	FBgn0033697	FBgn0000490	FBgn0051636	FBgn0029091	FBgn0038938	FBgn0030237	FBgn0003255	FBgn0024814	FBgn0039674	FBgn0036118	FBgn0023441
FBgn0003321	FBgn0031902	FBgn0053113	FBgn0045759	FBgn0033204	FBgn0037007	FBgn0034433	FBgn0038087	FBgn0023529	FBgn0026760	FBgn0033108	FBgn0033194
FBgn0038816	FBgn0053296	FBgn0031414	FBgn0030640	FBgn0039277	FBgn0002945	FBgn0038592	FBgn0032358	FBgn0028990	FBgn0037487	FBgn0013263	FBgn0041191
FBgn0037466	FBgn0032957	FBgn0037513	FBgn0085376	FBgn0034861	FBgn0035678	FBgn0038504	FBgn0043806	FBgn0036118	FBgn0028988	FBgn0017572	FBgn0032779
FBgn0010350	FBgn0086758	FBgn0032013	FBgn0032480	FBgn0038981	FBgn0037341	FBgn0052264	FBgn0032350	FBgn0027578	FBgn0035132	FBgn0038818	FBgn0051414
FBgn0004919	FBgn0000633	FBgn0020258	FBgn0029091	FBgn0051676	FBgn0010905	FBgn0004516	FBgn0025394	FBgn0031418	FBgn0085424	FBgn0261283	FBgn0035432
FBgn0038632	FBgn0031417	FBgn0039527	FBgn0033204	FBgn0004169	FBgn0039308	FBgn0039900	FBgn0037207	FBgn0017572	FBgn0003371	FBgn0000241	FBgn0000337
FBgn0028577	FBgn0029167	FBgn0029067	FBgn0038353	FBgn0051370	FBgn0000244	FBgn0051973	FBgn0015519	FBgn0052179	FBgn0001086	FBgn0004646	FBgn0021979
FBgn0035756	FBgn0032136	FBgn0033791	FBgn0043470	FBgn0031904	FBgn0030747	FBgn0004055	FBgn0020660	FBgn0040318	FBgn0039006	FBgn0029893	FBgn0003093
FBgn0030237	FBgn0015714	FBgn0042213	FBgn0038981	FBgn0259699	FBgn0085426	FBgn0037031	FBgn0033558	FBgn0259822	FBgn0028526	FBgn0052179	FBgn0030529
FBgn0034433	FBgn0029995	FBgn0033739	FBgn0051370	FBgn0000659	FBgn0038349	FBgn0051646	FBgn0033869	FBgn0010238	FBgn0003462	FBgn0259822	FBgn0032901
FBgn0038592	FBgn0033968	FBgn0003463	FBgn0036851	FBgn0052170	FBgn0038717	FBgn0028862	FBgn0042201	FBgn0033170	FBgn0250746	FBgn0033170	FBgn0035868
FBgn0038504	FBgn0030693	FBgn0029508	FBgn0002869	FBgn0002945	FBgn0039674	FBgn0037902	FBgn0032652	FBgn0036892	FBgn0035519	FBgn0036892	FBgn0036848
FBgn0052264	FBgn0052573	FBgn0034387	FBgn0035779	FBgn0035678	FBgn0053126	FBgn0260945	FBgn0034183	FBgn0031277	FBgn0053978	FBgn0000206	FBgn0050286
FBgn0004516	FBgn0000581	FBgn0035192	FBgn0000659	FBgn0032394	FBgn0003334	FBgn0052544	FBgn0013469	FBgn0262562	FBgn0085408	FBgn0052085	FBgn0038774
FBgn0039900	FBgn0031866	FBgn0045759	FBgn0052751	FBgn0010482	FBgn0051352	FBgn0037736	FBgn0040001	FBgn0033272	FBgn0087007	FBgn0259707	FBgn0030607
FBgn0051973	FBgn0036875	FBgn0033204	FBgn0037007	FBgn0037341	FBgn0040475	FBgn0050361	FBgn0027654	FBgn0032135	FBgn0025700	FBgn0032135	FBgn0028740
FBgn0004055	FBgn0052206	FBgn0039277	FBgn0037341	FBgn0086608	FBgn0033382	FBgn0039908	FBgn0035917	FBgn0259219	FBgn0023441	FBgn0037537	FBgn0010424
FBgn0037031	FBgn0039485	FBgn0035797	FBgn0086608	FBgn0051374	FBgn0038652	FBgn0036116	FBgn0044419	FBgn0052576	FBgn0259224	FBgn0259219	FBgn0034140
FBgn0051646	FBgn0027929	FBgn0034861	FBgn0039308	FBgn0039308	FBgn0039528	FBgn0022787	FBgn0033426	FBgn0027835	FBgn0030189	FBgn0027585	FBgn0032036
FBgn0028862	FBgn0028841	FBgn0001083	FBgn0005536	FBgn0259247	FBgn0032161	FBgn0034408	FBgn0031069	FBgn0031049	FBgn0032779	FBgn0028331	FBgn0010877
FBgn0037902	FBgn0030160	FBgn0038981	FBgn0032048	FBgn0034418	FBgn0054043	FBgn0035237	FBgn0037712	FBgn0031752	FBgn0010217	FBgn0085446	FBgn0050005
FBgn0260945	FBgn0034145	FBgn0051676	FBgn0030747	FBgn0005536	FBgn0028496	FBgn0053296	FBgn0030362	FBgn0085446	FBgn0000337	FBgn0033321	FBgn0038516
FBgn0052544	FBgn0035791	FBgn0004169	FBgn0085426	FBgn0000244	FBgn0010395	FBgn0032957	FBgn0035228	FBgn0033321	FBgn0015513	FBgn0039155	FBgn0010383
FBgn0037736	FBgn0028990	FBgn0051370	FBgn0038349	FBgn0030156	FBgn0029980	FBgn0086758	FBgn0031080	FBgn0052529	FBgn0021979	FBgn0031737	FBgn0029771
FBgn0050361	FBgn0004852	FBgn0035232	FBgn0030367	FBgn0030747	FBgn0004620	FBgn0000633	FBgn0085432	FBgn0028969	FBgn0259239	FBgn0028541	FBgn0050026
FBgn0044050	FBgn0050046	FBgn0259699	FBgn0053346	FBgn0085426	FBgn0085424	FBgn0036391	FBgn0036891	FBgn0039492	FBgn0036848	FBgn0037045	FBgn0250843
FBgn0039908	FBgn0038156	FBgn0000659	FBgn0054040	FBgn0034797	FBgn0035099	FBgn0044030	FBgn0036316	FBgn0031344	FBgn0050286	FBgn0044011	FBgn0022709
FBgn0036116	FBgn0037433	FBgn0052170	FBgn0034871	FBgn0038349	FBgn0003371	FBgn0040823	FBgn0017558	FBgn0037490	FBgn0030607	FBgn0086704	FBgn0032780
FBgn0022787	FBgn0027578	FBgn0002945	FBgn0085391	FBgn0031457	FBgn0032435	FBgn0259146	FBgn0032864	FBgn0028541	FBgn0028740	FBgn0031999	FBgn0050344
FBgn0034408	FBgn0033108	FBgn0261262	FBgn0035780	FBgn0002789	FBgn0053111	FBgn0029995	FBgn0034543	FBgn0086655	FBgn0034140	FBgn0030669	FBgn0038876
FBgn0035237	FBgn0037553	FBgn0032394	FBgn0053126	FBgn0002723	FBgn0024995	FBgn0028743	FBgn0034328	FBgn0086704	FBgn0038858	FBgn0033437	FBgn0259716
FBgn0053296	FBgn0013263	FBgn0039709	FBgn0036023	FBgn0039674	FBgn0034002	FBgn0011589	FBgn0036094	FBgn0019644	FBgn0038516	FBgn0040582	FBgn0013308
FBgn0032957	FBgn0038818	FBgn0010482	FBgn0003334	FBgn0036289	FBgn0024947	FBgn0250757	FBgn0026721	FBgn0036368	FBgn0036988	FBgn0011294	FBgn0035539
FBgn0086758	FBgn0000241	FBgn0037341	FBgn0051352	FBgn0026760	FBgn0039836	FBgn0052573	FBgn0025595	FBgn0003301	FBgn0010383	FBgn0086604	FBgn0036843
FBgn0000633	FBgn0004646	FBgn0051374	FBgn0040475	FBgn0037890	FBgn0026787	FBgn0000581	FBgn0037376	FBgn0036825	FBgn0014930	FBgn0034985	FBgn0022160
FBgn0036391	FBgn0040318	FBgn0259247	FBgn0038652	FBgn0035780	FBgn0039053	FBgn0085397	FBgn0261269	FBgn0000411	FBgn0023212	FBgn0001202	FBgn0029093
FBgn0044030	FBgn0036892	FBgn0005536	FBgn0002183	FBgn0053126	FBgn0033194	FBgn0029525	FBgn0039358	FBgn0037186	FBgn0053696	FBgn0053653	FBgn0033136
FBgn0015714	FBgn0000206	FBgn0000244	FBgn0039528	FBgn0051352	FBgn0038419	FBgn0260442	FBgn0032614	FBgn0030669	FBgn0036259	FBgn0036126	FBgn0038865
FBgn0040823	FBgn0259707	FBgn0030156	FBgn0038327	FBgn0031816	FBgn0030890	FBgn0031866	FBgn0259227	FBgn0012051	FBgn0050026	FBgn0037766	FBgn0020251
FBgn0029995	FBgn0085384	FBgn0085426	FBgn0051789	FBgn0037487	FBgn0037203	FBgn0025549	FBgn0042138	FBgn0036695	FBgn0032780	FBgn0032414	FBgn0050196
FBgn0028743	FBgn0037537	FBgn0034797	FBgn0010395	FBgn0039411	FBgn0036805	FBgn0052206	FBgn0051116	FBgn0024234	FBgn0038876	FBgn0025680	FBgn0013272
FBgn0045852	FBgn0024150	FBgn0038349	FBgn0023214	FBgn0002183	FBgn0259224	FBgn0027948	FBgn0038211	FBgn0034786	FBgn0039241	FBgn0037690	FBgn0004654
FBgn0011589	FBgn0027835	FBgn0002789	FBgn0085424	FBgn0036324	FBgn0032779	FBgn0028408	FBgn0036862	FBgn0020521	FBgn0032095	FBgn0033497	FBgn0259715
FBgn0250757	FBgn0030706	FBgn0063649	FBgn0034663	FBgn0001145	FBgn0035432	FBgn0035540	FBgn0039686	FBgn0036759	FBgn0259716	FBgn0260964	FBgn0038674
FBgn0052573	FBgn0027585	FBgn0039674	FBgn0037906	FBgn0028496	FBgn0036698	FBgn0034145	FBgn0040370	FBgn0036126	FBgn0013308	FBgn0035023	FBgn0032079
FBgn0000581	FBgn0035092	FBgn0053126	FBgn0037110	FBgn0051789	FBgn0000337	FBgn0259984	FBgn0037447	FBgn0037766	FBgn0035539	FBgn0034231	FBgn0040305
FBgn0029525	FBgn0033321	FBgn0051352	FBgn0039299	FBgn0010395	FBgn0083949	FBgn0050106	FBgn0011828	FBgn0032414	FBgn0032945	FBgn0014019	FBgn0001404
FBgn0031866	FBgn0031561	FBgn0002183	FBgn0035099	FBgn0033061	FBgn0021979	FBgn0004852	FBgn0040349	FBgn0259243	FBgn0036843	FBgn0031453	FBgn0040322
FBgn0025549	FBgn0039155	FBgn0031888	FBgn0036367	FBgn0004620	FBgn0039741	FBgn0051632	FBgn0035452	FBgn0036919	FBgn0261090	FBgn0031957	FBgn0015623
FBgn0052206	FBgn0030662	FBgn0036324	FBgn0039006	FBgn0034530	FBgn0025814	FBgn0038156	FBgn0039925	FBgn0030114	FBgn0022160	FBgn0039928	FBgn0010423
FBgn0027948	FBgn0037295	FBgn0038327	FBgn0032435	FBgn0085424	FBgn0003093	FBgn0004606	FBgn0034420	FBgn0025680	FBgn0000542	FBgn0027508	FBgn0030791
FBgn0028841	FBgn0031737	FBgn0028496	FBgn0053111	FBgn0039299	FBgn0030593	FBgn0033108	FBgn0004652	FBgn0034490	FBgn0029093	FBgn0060296	FBgn0038214
FBgn0028408	FBgn0035000	FBgn0033061	FBgn0024947	FBgn0035099	FBgn0035610	FBgn0013263	FBgn0039805	FBgn0026376	FBgn0003656	FBgn0030976	FBgn0028422
FBgn0083949	FBgn0044011	FBgn0023214	FBgn0039714	FBgn0003371	FBgn0016650	FBgn0017572	FBgn0024366	FBgn0033497	FBgn0085397	FBgn0036745	FBgn0051313
FBgn0035540	FBgn0034935	FBgn0004620	FBgn0034057	FBgn0001086	FBgn0030675	FBgn0038818	FBgn0041342	FBgn0260964	FBgn0038865	FBgn0030310	FBgn0051793
FBgn0034145	FBgn0086704	FBgn0034530	FBgn0053978	FBgn0036367	FBgn0033787	FBgn0000576	FBgn0035298	FBgn0262599	FBgn0020251	FBgn0037409	FBgn0259927
FBgn0259984	FBgn0036910	FBgn0037906	FBgn0024326	FBgn0039594	FBgn0033744	FBgn0004646	FBgn0037796	FBgn0031779	FBgn0050463	FBgn0045852	FBgn0037975
FBgn0004852	FBgn0003301	FBgn0037110	FBgn0033133	FBgn0032435	FBgn0014380	FBgn0259822	FBgn0038704	FBgn0031957	FBgn0029932	FBgn0030886	FBgn0001124
FBgn0038156	FBgn0000411	FBgn0039299	FBgn0087007	FBgn0053111	FBgn0037519	FBgn0033170	FBgn0030743	FBgn0039928	FBgn0000370	FBgn0031048	FBgn0014033
FBgn0004606	FBgn0031999	FBgn0001086	FBgn0025700	FBgn0030349	FBgn0028740	FBgn0036892	FBgn0051028	FBgn0086707	FBgn0013272	FBgn0030581	FBgn0064237
FBgn0033108	FBgn0052282	FBgn0039594	FBgn0038419	FBgn0024995	FBgn0086254	FBgn0028397	FBgn0031414	FBgn0259736	FBgn0004654	FBgn0003396	FBgn0025625
FBgn0013263	FBgn0033437	FBgn0053111	FBgn0037203	FBgn0053978	FBgn0028789	FBgn0052085	FBgn0030102	FBgn0261086	FBgn0038197	FBgn0033820	FBgn0010415
FBgn0017572	FBgn0040582	FBgn0030349	FBgn0030234	FBgn0033989	FBgn0038858	FBgn0259707	FBgn0037513	FBgn0036745	FBgn0259715	FBgn0005558	FBgn0036451
FBgn0038818	FBgn0032772	FBgn0003462	FBgn0030189	FBgn0026787	FBgn0032036	FBgn0085384	FBgn0020258	FBgn0026869	FBgn0032079	FBgn0010228	FBgn0023076
FBgn0004646	FBgn0028527	FBgn0035519	FBgn0032779	FBgn0085408	FBgn0011336	FBgn0032135	FBgn0035982	FBgn0017482	FBgn0040305	FBgn0013759	FBgn0053192
FBgn0029893	FBgn0011294	FBgn0053978	FBgn0259176	FBgn0033133	FBgn0038516	FBgn0259219	FBgn0038290	FBgn0030886	FBgn0004507	FBgn0028940	FBgn0035829
FBgn0040318	FBgn0063491	FBgn0029895	FBgn0039749	FBgn0087007	FBgn0028872	FBgn0024150	FBgn0027073	FBgn0085414	FBgn0040322	FBgn0041723	FBgn0028540
FBgn0259822	FBgn0085422	FBgn0023441	FBgn0015904	FBgn0039053	FBgn0015572	FBgn0027835	FBgn0033970	FBgn0031397	FBgn0015623	FBgn0025641	FBgn0033980
FBgn0000259	FBgn0086604	FBgn0033194	FBgn0030529	FBgn0033194	FBgn0030966	FBgn0030706	FBgn0022770	FBgn0036299	FBgn0030051	FBgn0243486	FBgn0040091
FBgn0033170	FBgn0034985	FBgn0036805	FBgn0035868	FBgn0038419	FBgn0029771	FBgn0031673	FBgn0032322	FBgn0003396	FBgn0040734	FBgn0031906	FBgn0026403
FBgn0036892	FBgn0001202	FBgn0036698	FBgn0085421	FBgn0030234	FBgn0028670	FBgn0035092	FBgn0259110	FBgn0010228	FBgn0032835	FBgn0029939	FBgn0032472
FBgn0028397	FBgn0053653	FBgn0259176	FBgn0050286	FBgn0035173	FBgn0032780	FBgn0052529	FBgn0259236	FBgn0032000	FBgn0038214	FBgn0036663	FBgn0030665
FBgn0052085	FBgn0025712	FBgn0039749	FBgn0030775	FBgn0032779	FBgn0050344	FBgn0032935	FBgn0003463	FBgn0040660	FBgn0026147	FBgn0001223	FBgn0035917
FBgn0259707	FBgn0037766	FBgn0025814	FBgn0033787	FBgn0259176	FBgn0030594	FBgn0024315	FBgn0001187	FBgn0000117	FBgn0051313	FBgn0005427	FBgn0036576
FBgn0085384	FBgn0032414	FBgn0003093	FBgn0033744	FBgn0030529	FBgn0036843	FBgn0030662	FBgn0030921	FBgn0243486	FBgn0051793	FBgn0037443	FBgn0027579
FBgn0262562	FBgn0040942	FBgn0030529	FBgn0014380	FBgn0032901	FBgn0014396	FBgn0037295	FBgn0000299	FBgn0036663	FBgn0032343	FBgn0020386	FBgn0030521
FBgn0032135	FBgn0050044	FBgn0259239	FBgn0040958	FBgn0035610	FBgn0022160	FBgn0031603	FBgn0053516	FBgn0001125	FBgn0037975	FBgn0031558	FBgn0085390
FBgn0259219	FBgn0030334	FBgn0027865	FBgn0038858	FBgn0016650	FBgn0085397	FBgn0035000	FBgn0033961	FBgn0028970	FBgn0039157	FBgn0028970	FBgn0050091
FBgn0024150	FBgn0032613	FBgn0050286	FBgn0035265	FBgn0013987	FBgn0050000	FBgn0015589	FBgn0034387	FBgn0005593	FBgn0064237	FBgn0014073	FBgn0032900
FBgn0027835	FBgn0025680	FBgn0033744	FBgn0038516	FBgn0050286	FBgn0001235	FBgn0053181	FBgn0031857	FBgn0030930	FBgn0025625	FBgn0036911	FBgn0036428
FBgn0030706	FBgn0037690	FBgn0038774	FBgn0015572	FBgn0036939	FBgn0260005	FBgn0034935	FBgn0033204	FBgn0014073	FBgn0010415	FBgn0259179	FBgn0026592
FBgn0031673	FBgn0033497	FBgn0014380	FBgn0014930	FBgn0033744	FBgn0013773	FBgn0036368	FBgn0035797	FBgn0259246	FBgn0023076	FBgn0032358	FBgn0037130
FBgn0035092	FBgn0260964	FBgn0028740	FBgn0029771	FBgn0038774	FBgn0051198	FBgn0030642	FBgn0001083	FBgn0031607	FBgn0000064	FBgn0043806	FBgn0039858
FBgn0052529	FBgn0035023	FBgn0034606	FBgn0028670	FBgn0031762	FBgn0013272	FBgn0003301	FBgn0033699	FBgn0038087	FBgn0028540	FBgn0053147	FBgn0051183
FBgn0032935	FBgn0003651	FBgn0010424	FBgn0032780	FBgn0010424	FBgn0016078	FBgn0004380	FBgn0051676	FBgn0027791	FBgn0037592	FBgn0039790	FBgn0260744
FBgn0030662	FBgn0028481	FBgn0001085	FBgn0030594	FBgn0028789	FBgn0004654	FBgn0000411	FBgn0040102	FBgn0032395	FBgn0026403	FBgn0000414	FBgn0259214
FBgn0037295	FBgn0014019	FBgn0050005	FBgn0034582	FBgn0030360	FBgn0051975	FBgn0030669	FBgn0004169	FBgn0039420	FBgn0030340	FBgn0015519	FBgn0044452
FBgn0031603	FBgn0036553	FBgn0030360	FBgn0014396	FBgn0015572	FBgn0032079	FBgn0033437	FBgn0051370	FBgn0038156	FBgn0032472	FBgn0020660	FBgn0039668
FBgn0035000	FBgn0031717	FBgn0037164	FBgn0022700	FBgn0030617	FBgn0001404	FBgn0012051	FBgn0085414	FBgn0032350	FBgn0030665	FBgn0033558	FBgn0030485
FBgn0000636	FBgn0031957	FBgn0029771	FBgn0035006	FBgn0029771	FBgn0030964	FBgn0015269	FBgn0034165	FBgn0025394	FBgn0038681	FBgn0025800	FBgn0033883
FBgn0015589	FBgn0039928	FBgn0020269	FBgn0051198	FBgn0028670	FBgn0030791	FBgn0004512	FBgn0020307	FBgn0000163	FBgn0036576	FBgn0033869	FBgn0031645
FBgn0053181	FBgn0003002	FBgn0036259	FBgn0020307	FBgn0022709	FBgn0039068	FBgn0085422	FBgn0013812	FBgn0037315	FBgn0036725	FBgn0042201	FBgn0038809
FBgn0034935	FBgn0261086	FBgn0022709	FBgn0050463	FBgn0020521	FBgn0002641	FBgn0086604	FBgn0037295	FBgn0069242	FBgn0027579	FBgn0032652	FBgn0028675
FBgn0036368	FBgn0060296	FBgn0051324	FBgn0034439	FBgn0036843	FBgn0026147	FBgn0034985	FBgn0052170	FBgn0037207	FBgn0036428	FBgn0023169	FBgn0034870
FBgn0030642	FBgn0036745	FBgn0032095	FBgn0029932	FBgn0014396	FBgn0035425	FBgn0001202	FBgn0032394	FBgn0000414	FBgn0051183	FBgn0038363	FBgn0053080
FBgn0003301	FBgn0030310	FBgn0052412	FBgn0013272	FBgn0022700	FBgn0050115	FBgn0053653	FBgn0010482	FBgn0051547	FBgn0260744	FBgn0029095	FBgn0020764
FBgn0004380	FBgn0052698	FBgn0035539	FBgn0016078	FBgn0053170	FBgn0243512	FBgn0025712	FBgn0028936	FBgn0015519	FBgn0026428	FBgn0033426	FBgn0051038
FBgn0000411	FBgn0037409	FBgn0038586	FBgn0030005	FBgn0000542	FBgn0001124	FBgn0037766	FBgn0051374	FBgn0020660	FBgn0044452	FBgn0038246	FBgn0032470
FBgn0030669	FBgn0030886	FBgn0014396	FBgn0040305	FBgn0052626	FBgn0004687	FBgn0039776	FBgn0005536	FBgn0036660	FBgn0039668	FBgn0003353	FBgn0016047
FBgn0033437	FBgn0032601	FBgn0000542	FBgn0001404	FBgn0033136	FBgn0051098	FBgn0259243	FBgn0029948	FBgn0052204	FBgn0033391	FBgn0037712	FBgn0034443
FBgn0012051	FBgn0031397	FBgn0032895	FBgn0039068	FBgn0085397	FBgn0038262	FBgn0030114	FBgn0030156	FBgn0036210	FBgn0030485	FBgn0051388	FBgn0028671
FBgn0015269	FBgn0003396	FBgn0033136	FBgn0002641	FBgn0260005	FBgn0032361	FBgn0037690	FBgn0085426	FBgn0025800	FBgn0033883	FBgn0031080	FBgn0015795
FBgn0004512	FBgn0032684	FBgn0085397	FBgn0261046	FBgn0004397	FBgn0004513	FBgn0033497	FBgn0034797	FBgn0038237	FBgn0031645	FBgn0036891	FBgn0022355
FBgn0085422	FBgn0032536	FBgn0001235	FBgn0038136	FBgn0051198	FBgn0028540	FBgn0035023	FBgn0038349	FBgn0023169	FBgn0034870	FBgn0086686	FBgn0037358
FBgn0086604	FBgn0033820	FBgn0020251	FBgn0050115	FBgn0050196	FBgn0033980	FBgn0028481	FBgn0030367	FBgn0032075	FBgn0053080	FBgn0017558	FBgn0035763
FBgn0034985	FBgn0005558	FBgn0004397	FBgn0243512	FBgn0033649	FBgn0028515	FBgn0038893	FBgn0002789	FBgn0027654	FBgn0020764	FBgn0032864	FBgn0023095
FBgn0001202	FBgn0037408	FBgn0050196	FBgn0030928	FBgn0050463	FBgn0051454	FBgn0022699	FBgn0001114	FBgn0038363	FBgn0038205	FBgn0034328	FBgn0032202
FBgn0053653	FBgn0038494	FBgn0033649	FBgn0033294	FBgn0039244	FBgn0038846	FBgn0039928	FBgn0031184	FBgn0028538	FBgn0051038	FBgn0020762	FBgn0038115
FBgn0025712	FBgn0028940	FBgn0034439	FBgn0001124	FBgn0013272	FBgn0043362	FBgn0035888	FBgn0035050	FBgn0044419	FBgn0031814	FBgn0040754	FBgn0010516
FBgn0037766	FBgn0041723	FBgn0000370	FBgn0260487	FBgn0016078	FBgn0030665	FBgn0027508	FBgn0260812	FBgn0029095	FBgn0032470	FBgn0031100	FBgn0025879
FBgn0039831	FBgn0037298	FBgn0039244	FBgn0004687	FBgn0030005	FBgn0038681	FBgn0003002	FBgn0032055	FBgn0037671	FBgn0016047	FBgn0030555	FBgn0032821
FBgn0039776	FBgn0025641	FBgn0013272	FBgn0051098	FBgn0016081	FBgn0002567	FBgn0261086	FBgn0050163	FBgn0037712	FBgn0085383	FBgn0026721	FBgn0035625
FBgn0259243	FBgn0031906	FBgn0016078	FBgn0038262	FBgn0004654	FBgn0036725	FBgn0036745	FBgn0039023	FBgn0033483	FBgn0034443	FBgn0033902	FBgn0037207
FBgn0050044	FBgn0033983	FBgn0030005	FBgn0040342	FBgn0038674	FBgn0030521	FBgn0052112	FBgn0085419	FBgn0036485	FBgn0035785	FBgn0040281	FBgn0028983
FBgn0030114	FBgn0029939	FBgn0016081	FBgn0023076	FBgn0032079	FBgn0028886	FBgn0036305	FBgn0039239	FBgn0038404	FBgn0001185	FBgn0039500	FBgn0032791
FBgn0037690	FBgn0036663	FBgn0051189	FBgn0053192	FBgn0001404	FBgn0085390	FBgn0030886	FBgn0030798	FBgn0016696	FBgn0022355	FBgn0050497	FBgn0000406
FBgn0026376	FBgn0033629	FBgn0004654	FBgn0033980	FBgn0040322	FBgn0035101	FBgn0031397	FBgn0039674	FBgn0000257	FBgn0010424	FBgn0259227	FBgn0031692
FBgn0033497	FBgn0005427	FBgn0038674	FBgn0051454	FBgn0010423	FBgn0050091	FBgn0002778	FBgn0085391	FBgn0050394	FBgn0051708	FBgn0033730	FBgn0030251
FBgn0260964	FBgn0031558	FBgn0040322	FBgn0043471	FBgn0030051	FBgn0032900	FBgn0030581	FBgn0037890	FBgn0038972	FBgn0032202	FBgn0042138	FBgn0039430
FBgn0036814	FBgn0028970	FBgn0010423	FBgn0036952	FBgn0039068	FBgn0039052	FBgn0003396	FBgn0037487	FBgn0037252	FBgn0038115	FBgn0040299	FBgn0001150
FBgn0033815	FBgn0001320	FBgn0030051	FBgn0038681	FBgn0003900	FBgn0260744	FBgn0004509	FBgn0039411	FBgn0040754	FBgn0010516	FBgn0051116	FBgn0035484
FBgn0004369	FBgn0029997	FBgn0039068	FBgn0039768	FBgn0028422	FBgn0026428	FBgn0039339	FBgn0028988	FBgn0031100	FBgn0025879	FBgn0038211	FBgn0003963
FBgn0035023	FBgn0259170	FBgn0003900	FBgn0036576	FBgn0024734	FBgn0052113	FBgn0005558	FBgn0036324	FBgn0036260	FBgn0032821	FBgn0033872	FBgn0000055
FBgn0028481	FBgn0014073	FBgn0032835	FBgn0036725	FBgn0038136	FBgn0034005	FBgn0034763	FBgn0001145	FBgn0031356	FBgn0035625	FBgn0052103	FBgn0002939
FBgn0020379	FBgn0039722	FBgn0028422	FBgn0051720	FBgn0001124	FBgn0031818	FBgn0036058	FBgn0035132	FBgn0010803	FBgn0053969	FBgn0011828	FBgn0038738
FBgn0000499	FBgn0026576	FBgn0051793	FBgn0038416	FBgn0051098	FBgn0033391	FBgn0037408	FBgn0038327	FBgn0037689	FBgn0032791	FBgn0038439	FBgn0261113
FBgn0035270	FBgn0003255	FBgn0243512	FBgn0030521	FBgn0036040	FBgn0033883	FBgn0010228	FBgn0039909	FBgn0037376	FBgn0000406	FBgn0039925	FBgn0259099
FBgn0038893	FBgn0038087	FBgn0259927	FBgn0041630	FBgn0038262	FBgn0028675	FBgn0013759	FBgn0029888	FBgn0031536	FBgn0030251	FBgn0034725	FBgn0029524
FBgn0022699	FBgn0259179	FBgn0001124	FBgn0259173	FBgn0004513	FBgn0053080	FBgn0038494	FBgn0033061	FBgn0032120	FBgn0031459	FBgn0000250	FBgn0030261
FBgn0031453	FBgn0032358	FBgn0260487	FBgn0035101	FBgn0010415	FBgn0036877	FBgn0028940	FBgn0085424	FBgn0005648	FBgn0039430	FBgn0004652	FBgn0085407
FBgn0031717	FBgn0043806	FBgn0004687	FBgn0050091	FBgn0023076	FBgn0039015	FBgn0041723	FBgn0038201	FBgn0050497	FBgn0001138	FBgn0039805	FBgn0028424
FBgn0039928	FBgn0036046	FBgn0036040	FBgn0039470	FBgn0036377	FBgn0032470	FBgn0029713	FBgn0003371	FBgn0250908	FBgn0001150	FBgn0260972	FBgn0024986
FBgn0035888	FBgn0053147	FBgn0039157	FBgn0028932	FBgn0033980	FBgn0051076	FBgn0025641	FBgn0039594	FBgn0033357	FBgn0035484	FBgn0001150	FBgn0001122
FBgn0027508	FBgn0051547	FBgn0036198	FBgn0051183	FBgn0028515	FBgn0085383	FBgn0243486	FBgn0038631	FBgn0029736	FBgn0000055	FBgn0038704	FBgn0001142
FBgn0003002	FBgn0015519	FBgn0010415	FBgn0034005	FBgn0040091	FBgn0034346	FBgn0031906	FBgn0042696	FBgn0051116	FBgn0038738	FBgn0030707	FBgn0053548
FBgn0261086	FBgn0052204	FBgn0023076	FBgn0033391	FBgn0030665	FBgn0001185	FBgn0027561	FBgn0028526	FBgn0038829	FBgn0259099	FBgn0037166	FBgn0029525
FBgn0052112	FBgn0051475	FBgn0031282	FBgn0036978	FBgn0037270	FBgn0015795	FBgn0035204	FBgn0003462	FBgn0015797	FBgn0030261	FBgn0039332	FBgn0260660
FBgn0036305	FBgn0033558	FBgn0036377	FBgn0039427	FBgn0051121	FBgn0013563	FBgn0033983	FBgn0035385	FBgn0026371	FBgn0085407	FBgn0039149	FBgn0032160
FBgn0030886	FBgn0042201	FBgn0033980	FBgn0028675	FBgn0026370	FBgn0010424	FBgn0039419	FBgn0053978	FBgn0052103	FBgn0000015	FBgn0000490	FBgn0011754
FBgn0085414	FBgn0038237	FBgn0028515	FBgn0053080	FBgn0036576	FBgn0039260	FBgn0036663	FBgn0024963	FBgn0050491	FBgn0052479	FBgn0031414	FBgn0034126
FBgn0031397	FBgn0032652	FBgn0037592	FBgn0032002	FBgn0036725	FBgn0010825	FBgn0005427	FBgn0085408	FBgn0039510	FBgn0000546	FBgn0035041	FBgn0036824
FBgn0004509	FBgn0039620	FBgn0052626	FBgn0039015	FBgn0051720	FBgn0035695	FBgn0028970	FBgn0023441	FBgn0040370	FBgn0032615	FBgn0037513	FBgn0040606
FBgn0033915	FBgn0002941	FBgn0034030	FBgn0032470	FBgn0028886	FBgn0031662	FBgn0029997	FBgn0259224	FBgn0085404	FBgn0033250	FBgn0051774	FBgn0023000
FBgn0005558	FBgn0033426	FBgn0051121	FBgn0051076	FBgn0014032	FBgn0032202	FBgn0039722	FBgn0032260	FBgn0011828	FBgn0020235	FBgn0029105	FBgn0034094
FBgn0034763	FBgn0038246	FBgn0026370	FBgn0259221	FBgn0041630	FBgn0038115	FBgn0031107	FBgn0036698	FBgn0030465	FBgn0052532	FBgn0032013	FBgn0004395
FBgn0037408	FBgn0003353	FBgn0004573	FBgn0012037	FBgn0035166	FBgn0010516	FBgn0003255	FBgn0039749	FBgn0035452	FBgn0029525	FBgn0037603	FBgn0015222
FBgn0010228	FBgn0037712	FBgn0036725	FBgn0010424	FBgn0259173	FBgn0259246	FBgn0038087	FBgn0000337	FBgn0032130	FBgn0029723	FBgn0039527	FBgn0039525
FBgn0013759	FBgn0038716	FBgn0051720	FBgn0032733	FBgn0085390	FBgn0038842	FBgn0039420	FBgn0042119	FBgn0004652	FBgn0030505	FBgn0029067	FBgn0033367
FBgn0038494	FBgn0051388	FBgn0027579	FBgn0051233	FBgn0035101	FBgn0037846	FBgn0043806	FBgn0086677	FBgn0024366	FBgn0030318	FBgn0033791	FBgn0033875
FBgn0028940	FBgn0030362	FBgn0035844	FBgn0037358	FBgn0032900	FBgn0032908	FBgn0025394	FBgn0030593	FBgn0041342	FBgn0053639	FBgn0030358	FBgn0039738
FBgn0041723	FBgn0031080	FBgn0028886	FBgn0038115	FBgn0010015	FBgn0047178	FBgn0027609	FBgn0025702	FBgn0035879	FBgn0032160	FBgn0259236	FBgn0085405
FBgn0029713	FBgn0036891	FBgn0014032	FBgn0034291	FBgn0260744	FBgn0037750	FBgn0053147	FBgn0038774	FBgn0001150	FBgn0050015	FBgn0033739	FBgn0037442
FBgn0025641	FBgn0040923	FBgn0041630	FBgn0015001	FBgn0259214	FBgn0038360	FBgn0016698	FBgn0035293	FBgn0038704	FBgn0034126	FBgn0003463	FBgn0038129
FBgn0000117	FBgn0037627	FBgn0035166	FBgn0260933	FBgn0260745	FBgn0034083	FBgn0000414	FBgn0030607	FBgn0030336	FBgn0036824	FBgn0029508	FBgn0037387
FBgn0031906	FBgn0002774	FBgn0085390	FBgn0259247	FBgn0033391	FBgn0039644	FBgn0035720	FBgn0028740	FBgn0085409	FBgn0040606	FBgn0024841	FBgn0011584
FBgn0033983	FBgn0032864	FBgn0032900	FBgn0039818	FBgn0030485	FBgn0035484	FBgn0015519	FBgn0034140	FBgn0031676	FBgn0034094	FBgn0051636	FBgn0025631
FBgn0039419	FBgn0034328	FBgn0038381	FBgn0037846	FBgn0031645	FBgn0000055	FBgn0020660	FBgn0038858	FBgn0039617	FBgn0034329	FBgn0013334	FBgn0259228
FBgn0029939	FBgn0036094	FBgn0010015	FBgn0085205	FBgn0028675	FBgn0033905	FBgn0036660	FBgn0030360	FBgn0030974	FBgn0033875	FBgn0034387	FBgn0035977
FBgn0036663	FBgn0020762	FBgn0026059	FBgn0085261	FBgn0053080	FBgn0033812	FBgn0052204	FBgn0038516	FBgn0261239	FBgn0052791	FBgn0032480	FBgn0259212
FBgn0005427	FBgn0031100	FBgn0260744	FBgn0028552	FBgn0032002	FBgn0002939	FBgn0051475	FBgn0030617	FBgn0002590	FBgn0085405	FBgn0039277	FBgn0015570
FBgn0028970	FBgn0030555	FBgn0259214	FBgn0028983	FBgn0039015	FBgn0261113	FBgn0033558	FBgn0010383	FBgn0037513	FBgn0037442	FBgn0034861	FBgn0037230
FBgn0029997	FBgn0026721	FBgn0002573	FBgn0037750	FBgn0032470	FBgn0001250	FBgn0040918	FBgn0037164	FBgn0051774	FBgn0038129	FBgn0001083	FBgn0035978
FBgn0037109	FBgn0038295	FBgn0031818	FBgn0030600	FBgn0051076	FBgn0259099	FBgn0010113	FBgn0029771	FBgn0020258	FBgn0037387	FBgn0000157	FBgn0027563
FBgn0039141	FBgn0025595	FBgn0033391	FBgn0033928	FBgn0034067	FBgn0000015	FBgn0038237	FBgn0020269	FBgn0038750	FBgn0011584	FBgn0033699	FBgn0032402
FBgn0039722	FBgn0030339	FBgn0030485	FBgn0034083	FBgn0085383	FBgn0033051	FBgn0013469	FBgn0053696	FBgn0037603	FBgn0025631	FBgn0259699	FBgn0020416
FBgn0031107	FBgn0038654	FBgn0028675	FBgn0031929	FBgn0034443	FBgn0028424	FBgn0002941	FBgn0036259	FBgn0033791	FBgn0032668	FBgn0039883	FBgn0031474
FBgn0036911	FBgn0040281	FBgn0053523	FBgn0033905	FBgn0001185	FBgn0024986	FBgn0044419	FBgn0050026	FBgn0259110	FBgn0035977	FBgn0034165	FBgn0039099
FBgn0003255	FBgn0050497	FBgn0032470	FBgn0033812	FBgn0037358	FBgn0037720	FBgn0023531	FBgn0022709	FBgn0042213	FBgn0015570	FBgn0035528	FBgn0032612
FBgn0038087	FBgn0250908	FBgn0034067	FBgn0002939	FBgn0028494	FBgn0035236	FBgn0033426	FBgn0032780	FBgn0036288	FBgn0037230	FBgn0261262	FBgn0039678
FBgn0032395	FBgn0027109	FBgn0259168	FBgn0261113	FBgn0003091	FBgn0001142	FBgn0038246	FBgn0038876	FBgn0259236	FBgn0040531	FBgn0028996	FBgn0039030
FBgn0039420	FBgn0026411	FBgn0034443	FBgn0259099	FBgn0033387	FBgn0037065	FBgn0003353	FBgn0029851	FBgn0033739	FBgn0035978	FBgn0038279	FBgn0038819
FBgn0043806	FBgn0033730	FBgn0036534	FBgn0015591	FBgn0010825	FBgn0035673	FBgn0037712	FBgn0259716	FBgn0003463	FBgn0027563	FBgn0031450	FBgn0033504
FBgn0036046	FBgn0042138	FBgn0001185	FBgn0051266	FBgn0035695	FBgn0029723	FBgn0051388	FBgn0013308	FBgn0029508	FBgn0032402	FBgn0024996	FBgn0037547
FBgn0027609	FBgn0051116	FBgn0015795	FBgn0029524	FBgn0023095	FBgn0051072	FBgn0038199	FBgn0035539	FBgn0053516	FBgn0014859	FBgn0039709	FBgn0030748
FBgn0053147	FBgn0038211	FBgn0001301	FBgn0085407	FBgn0010453	FBgn0042103	FBgn0036485	FBgn0034655	FBgn0034387	FBgn0020416	FBgn0037341	FBgn0029689
FBgn0000414	FBgn0033872	FBgn0002643	FBgn0052677	FBgn0025879	FBgn0030318	FBgn0085432	FBgn0020521	FBgn0045759	FBgn0031474	FBgn0040513	FBgn0036932
FBgn0035720	FBgn0035236	FBgn0015772	FBgn0033051	FBgn0035625	FBgn0039561	FBgn0086686	FBgn0053170	FBgn0025109	FBgn0051562	FBgn0028936	FBgn0016675
FBgn0051547	FBgn0039686	FBgn0033387	FBgn0028424	FBgn0260933	FBgn0031081	FBgn0002774	FBgn0022160	FBgn0032480	FBgn0085433	FBgn0039135	FBgn0038465
FBgn0015519	FBgn0040370	FBgn0010825	FBgn0024986	FBgn0038842	FBgn0036824	FBgn0000257	FBgn0029093	FBgn0026722	FBgn0039099	FBgn0085411	FBgn0038309
FBgn0020660	FBgn0004921	FBgn0023095	FBgn0032615	FBgn0037846	FBgn0023000	FBgn0017558	FBgn0038865	FBgn0035797	FBgn0039678	FBgn0051064	FBgn0026634
FBgn0036660	FBgn0011828	FBgn0038115	FBgn0038542	FBgn0085205	FBgn0039872	FBgn0020762	FBgn0050196	FBgn0051370	FBgn0039030	FBgn0034418	FBgn0011286
FBgn0052204	FBgn0040349	FBgn0025879	FBgn0035236	FBgn0035089	FBgn0015222	FBgn0040754	FBgn0050463	FBgn0020910	FBgn0010747	FBgn0023524	FBgn0036750
FBgn0051475	FBgn0035452	FBgn0032821	FBgn0053548	FBgn0047178	FBgn0039525	FBgn0031100	FBgn0029932	FBgn0035232	FBgn0033504	FBgn0085426	FBgn0035001
FBgn0033558	FBgn0039925	FBgn0035625	FBgn0037065	FBgn0037750	FBgn0033875	FBgn0026721	FBgn0051189	FBgn0259699	FBgn0037547	FBgn0034797	FBgn0000064
FBgn0025800	FBgn0034725	FBgn0034158	FBgn0037562	FBgn0030251	FBgn0011661	FBgn0038295	FBgn0004654	FBgn0036851	FBgn0029689	FBgn0039054	FBgn0036463
FBgn0010113	FBgn0004652	FBgn0053969	FBgn0029525	FBgn0027586	FBgn0011584	FBgn0030339	FBgn0259715	FBgn0013812	FBgn0016675	FBgn0030367	FBgn0023129
FBgn0038237	FBgn0063923	FBgn0260933	FBgn0051072	FBgn0034083	FBgn0025631	FBgn0010803	FBgn0038674	FBgn0000659	FBgn0038465	FBgn0001114	FBgn0036271
FBgn0002941	FBgn0035495	FBgn0038842	FBgn0042103	FBgn0261113	FBgn0259228	FBgn0037689	FBgn0032079	FBgn0035528	FBgn0038309	FBgn0002723	FBgn0037705
FBgn0044419	FBgn0039805	FBgn0035089	FBgn0053639	FBgn0001250	FBgn0032668	FBgn0040281	FBgn0004507	FBgn0037295	FBgn0011204	FBgn0035050	FBgn0043791
FBgn0023531	FBgn0037796	FBgn0047178	FBgn0034647	FBgn0259099	FBgn0035977	FBgn0005648	FBgn0040322	FBgn0026598	FBgn0037956	FBgn0030100	FBgn0038627
FBgn0033426	FBgn0030707	FBgn0032791	FBgn0037092	FBgn0015591	FBgn0259212	FBgn0250908	FBgn0015623	FBgn0031600	FBgn0036274	FBgn0032059	FBgn0025456
FBgn0038246	FBgn0037166	FBgn0031692	FBgn0031081	FBgn0051266	FBgn0052024	FBgn0259227	FBgn0010423	FBgn0038149	FBgn0026634	FBgn0085419	FBgn0003067
FBgn0003353	FBgn0038321	FBgn0027586	FBgn0050015	FBgn0029524	FBgn0035978	FBgn0026411	FBgn0030051	FBgn0039523	FBgn0033904	FBgn0030798	FBgn0033356
FBgn0037712	FBgn0051028	FBgn0034083	FBgn0030447	FBgn0000015	FBgn0032402	FBgn0037541	FBgn0040734	FBgn0037341	FBgn0027621	FBgn0031858	FBgn0035087
FBgn0051388	FBgn0039617	FBgn0039430	FBgn0034052	FBgn0038610	FBgn0020416	FBgn0051116	FBgn0032835	FBgn0040513	FBgn0035001	FBgn0035989	FBgn0034194
FBgn0033483	FBgn0039332	FBgn0004636	FBgn0036043	FBgn0259143	FBgn0031474	FBgn0016641	FBgn0038214	FBgn0052163	FBgn0034629	FBgn0031816	FBgn0024189
FBgn0038199	FBgn0028645	FBgn0000055	FBgn0015222	FBgn0053548	FBgn0051715	FBgn0033872	FBgn0028422	FBgn0085411	FBgn0036463	FBgn0015400	FBgn0031217
FBgn0036485	FBgn0004611	FBgn0033812	FBgn0033423	FBgn0037065	FBgn0051562	FBgn0026371	FBgn0261046	FBgn0000244	FBgn0023129	FBgn0033960	FBgn0050008
FBgn0027780	FBgn0000490	FBgn0035233	FBgn0037782	FBgn0029723	FBgn0030748	FBgn0052103	FBgn0051313	FBgn0035793	FBgn0036271	FBgn0039528	FBgn0043783
FBgn0086686	FBgn0031414	FBgn0001250	FBgn0085405	FBgn0051072	FBgn0029689	FBgn0035236	FBgn0051793	FBgn0002723	FBgn0037705	FBgn0001145	FBgn0033903
FBgn0016696	FBgn0035041	FBgn0259099	FBgn0037387	FBgn0036168	FBgn0038799	FBgn0050491	FBgn0037975	FBgn0085419	FBgn0043791	FBgn0067864	FBgn0037646
FBgn0002774	FBgn0034865	FBgn0029524	FBgn0036372	FBgn0030318	FBgn0036777	FBgn0036862	FBgn0014033	FBgn0039674	FBgn0035806	FBgn0037921	FBgn0031935
FBgn0000257	FBgn0037513	FBgn0028424	FBgn0025631	FBgn0034647	FBgn0039873	FBgn0031683	FBgn0021906	FBgn0053126	FBgn0259238	FBgn0259222	FBgn0037448
FBgn0034742	FBgn0051774	FBgn0024986	FBgn0259228	FBgn0037092	FBgn0029950	FBgn0040370	FBgn0064237	FBgn0051352	FBgn0033906	FBgn0039299	FBgn0032209
FBgn0036094	FBgn0029105	FBgn0040212	FBgn0039622	FBgn0031081	FBgn0033904	FBgn0004921	FBgn0025625	FBgn0031816	FBgn0038627	FBgn0039594	FBgn0016926
FBgn0020762	FBgn0032013	FBgn0001122	FBgn0032668	FBgn0050015	FBgn0010223	FBgn0004390	FBgn0023076	FBgn0039411	FBgn0025456	FBgn0050077	FBgn0032297
FBgn0031100	FBgn0260446	FBgn0053548	FBgn0032839	FBgn0034094	FBgn0036945	FBgn0011828	FBgn0031282	FBgn0034277	FBgn0038662	FBgn0030349	FBgn0003076
FBgn0038295	FBgn0020258	FBgn0051146	FBgn0259212	FBgn0004395	FBgn0050463	FBgn0037884	FBgn0036377	FBgn0015756	FBgn0003067	FBgn0038862	FBgn0036179
FBgn0030339	FBgn0027073	FBgn0029525	FBgn0085430	FBgn0039738	FBgn0037354	FBgn0039925	FBgn0035829	FBgn0038652	FBgn0033159	FBgn0034789	FBgn0032787
FBgn0010803	FBgn0259923	FBgn0029723	FBgn0035676	FBgn0011661	FBgn0086346	FBgn0034725	FBgn0033980	FBgn0002183	FBgn0035087	FBgn0037723	FBgn0010470
FBgn0025382	FBgn0033970	FBgn0033627	FBgn0036309	FBgn0011584	FBgn0033809	FBgn0004652	FBgn0026403	FBgn0039528	FBgn0003885	FBgn0028526	FBgn0028369
FBgn0037689	FBgn0032322	FBgn0032160	FBgn0040531	FBgn0259228	FBgn0043791	FBgn0035495	FBgn0032472	FBgn0032161	FBgn0024740	FBgn0026577	FBgn0051217
FBgn0260970	FBgn0033791	FBgn0033702	FBgn0035743	FBgn0039622	FBgn0033906	FBgn0031710	FBgn0034030	FBgn0001145	FBgn0050008	FBgn0004880	FBgn0037744
FBgn0040281	FBgn0259110	FBgn0034647	FBgn0031865	FBgn0028371	FBgn0025456	FBgn0041342	FBgn0030665	FBgn0038327	FBgn0043783	FBgn0035519	FBgn0003731
FBgn0037918	FBgn0030358	FBgn0031081	FBgn0085433	FBgn0035977	FBgn0038662	FBgn0001150	FBgn0036576	FBgn0028496	FBgn0033903	FBgn0053978	FBgn0019932
FBgn0005648	FBgn0033739	FBgn0035390	FBgn0031968	FBgn0259212	FBgn0036550	FBgn0037472	FBgn0027579	FBgn0051789	FBgn0036851	FBgn0029895	FBgn0023516
FBgn0250908	FBgn0029508	FBgn0023000	FBgn0030748	FBgn0027563	FBgn0034194	FBgn0037166	FBgn0003295	FBgn0029980	FBgn0004648	FBgn0039698	FBgn0051445
FBgn0027109	FBgn0030921	FBgn0034094	FBgn0262593	FBgn0085354	FBgn0052099	FBgn0038321	FBgn0035049	FBgn0023214	FBgn0004839	FBgn0085408	FBgn0040827
FBgn0259227	FBgn0051636	FBgn0004395	FBgn0010223	FBgn0020416	FBgn0043783	FBgn0039617	FBgn0050091	FBgn0034530	FBgn0037646	FBgn0024326	FBgn0028955
FBgn0026411	FBgn0013334	FBgn0051158	FBgn0036945	FBgn0039748	FBgn0033903	FBgn0039332	FBgn0032900	FBgn0011509	FBgn0038475	FBgn0033133	FBgn0003218
FBgn0259170	FBgn0034387	FBgn0039525	FBgn0035001	FBgn0031474	FBgn0260658	FBgn0030974	FBgn0010015	FBgn0037218	FBgn0061492	FBgn0034304	FBgn0040551
FBgn0037541	FBgn0033368	FBgn0037442	FBgn0034629	FBgn0036665	FBgn0035355	FBgn0261239	FBgn0031021	FBgn0033271	FBgn0031935	FBgn0035520	FBgn0020300
FBgn0051116	FBgn0032480	FBgn0011661	FBgn0038079	FBgn0031865	FBgn0033222	FBgn0028645	FBgn0051183	FBgn0045035	FBgn0032209	FBgn0030234	FBgn0035444
FBgn0053182	FBgn0033204	FBgn0037387	FBgn0037354	FBgn0037213	FBgn0032242	FBgn0004611	FBgn0260744	FBgn0031456	FBgn0035756	FBgn0037536	FBgn0033065
FBgn0016641	FBgn0039277	FBgn0038744	FBgn0259146	FBgn0259244	FBgn0036896	FBgn0039149	FBgn0026428	FBgn0026379	FBgn0016926	FBgn0052736	FBgn0259143
FBgn0033872	FBgn0001083	FBgn0011584	FBgn0036271	FBgn0035308	FBgn0033873	FBgn0031414	FBgn0259214	FBgn0037906	FBgn0032297	FBgn0052442	FBgn0010041
FBgn0026371	FBgn0000157	FBgn0259228	FBgn0034292	FBgn0005677	FBgn0053526	FBgn0035041	FBgn0044452	FBgn0030795	FBgn0037167	FBgn0035432	FBgn0031515
FBgn0035236	FBgn0035816	FBgn0039622	FBgn0037705	FBgn0033504	FBgn0031877	FBgn0037513	FBgn0039668	FBgn0037110	FBgn0003076	FBgn0036698	FBgn0050281
FBgn0036862	FBgn0250757	FBgn0027101	FBgn0033809	FBgn0030748	FBgn0038475	FBgn0051774	FBgn0033391	FBgn0026060	FBgn0036179	FBgn0039749	FBgn0039932
FBgn0031683	FBgn0033699	FBgn0028371	FBgn0010341	FBgn0029689	FBgn0029835	FBgn0029105	FBgn0030485	FBgn0038201	FBgn0032787	FBgn0000337	FBgn0034538
FBgn0040370	FBgn0051676	FBgn0035977	FBgn0259238	FBgn0038465	FBgn0031738	FBgn0032013	FBgn0031645	FBgn0035099	FBgn0259175	FBgn0029514	FBgn0033257
FBgn0004921	FBgn0040102	FBgn0259212	FBgn0013469	FBgn0038799	FBgn0003076	FBgn0260446	FBgn0260653	FBgn0031985	FBgn0010470	FBgn0021979	FBgn0052815
FBgn0011828	FBgn0051370	FBgn0027563	FBgn0025456	FBgn0037956	FBgn0032787	FBgn0020258	FBgn0014141	FBgn0001086	FBgn0037955	FBgn0053108	FBgn0000044
FBgn0037884	FBgn0085414	FBgn0014859	FBgn0031689	FBgn0026634	FBgn0259175	FBgn0038290	FBgn0053080	FBgn0053111	FBgn0051217	FBgn0000273	FBgn0030828
FBgn0033028	FBgn0039883	FBgn0085354	FBgn0034194	FBgn0039681	FBgn0030056	FBgn0027073	FBgn0020764	FBgn0013325	FBgn0037744	FBgn0003093	FBgn0031897
FBgn0039925	FBgn0034165	FBgn0020416	FBgn0037976	FBgn0036105	FBgn0039319	FBgn0259923	FBgn0036877	FBgn0030349	FBgn0034966	FBgn0032901	FBgn0004456
FBgn0261278	FBgn0013812	FBgn0031474	FBgn0035355	FBgn0036945	FBgn0037617	FBgn0052000	FBgn0051038	FBgn0031988	FBgn0003731	FBgn0085241	FBgn0031987
FBgn0034725	FBgn0002945	FBgn0036665	FBgn0033222	FBgn0031037	FBgn0034639	FBgn0032322	FBgn0031814	FBgn0035385	FBgn0035266	FBgn0016650	FBgn0025624
FBgn0000250	FBgn0261262	FBgn0052451	FBgn0031533	FBgn0085491	FBgn0037955	FBgn0029067	FBgn0032470	FBgn0024947	FBgn0019932	FBgn0033985	FBgn0004387
FBgn0004652	FBgn0028996	FBgn0051562	FBgn0036896	FBgn0004889	FBgn0051550	FBgn0033791	FBgn0016047	FBgn0053978	FBgn0023516	FBgn0259233	FBgn0030685
FBgn0035495	FBgn0038279	FBgn0085433	FBgn0038475	FBgn0028369	FBgn0027779	FBgn0259110	FBgn0034443	FBgn0026787	FBgn0029706	FBgn0085421	FBgn0001248
FBgn0041342	FBgn0028936	FBgn0037213	FBgn0029835	FBgn0012051	FBgn0037744	FBgn0030358	FBgn0035785	FBgn0033133	FBgn0259163	FBgn0050286	FBgn0003117
FBgn0035158	FBgn0039308	FBgn0034931	FBgn0037448	FBgn0037705	FBgn0039519	FBgn0033739	FBgn0001185	FBgn0025700	FBgn0028658	FBgn0036939	FBgn0051675
FBgn0001150	FBgn0259247	FBgn0032612	FBgn0032209	FBgn0020493	FBgn0000339	FBgn0003463	FBgn0022355	FBgn0033194	FBgn0040827	FBgn0033817	FBgn0050197
FBgn0037472	FBgn0051064	FBgn0035290	FBgn0050043	FBgn0030245	FBgn0259163	FBgn0000299	FBgn0010424	FBgn0003360	FBgn0020236	FBgn0035293	FBgn0032001
FBgn0030707	FBgn0023524	FBgn0033504	FBgn0031738	FBgn0036550	FBgn0046247	FBgn0022764	FBgn0031630	FBgn0034304	FBgn0028734	FBgn0032681	FBgn0021765
FBgn0030863	FBgn0005536	FBgn0031126	FBgn0036921	FBgn0034194	FBgn0040827	FBgn0013334	FBgn0023095	FBgn0030890	FBgn0028955	FBgn0028740	FBgn0000567
FBgn0038321	FBgn0032048	FBgn0038465	FBgn0032787	FBgn0037976	FBgn0034275	FBgn0034387	FBgn0086690	FBgn0010263	FBgn0051548	FBgn0030360	FBgn0051140
FBgn0085409	FBgn0034797	FBgn0037956	FBgn0051469	FBgn0260658	FBgn0040250	FBgn0033368	FBgn0010352	FBgn0036698	FBgn0027348	FBgn0029837	FBgn0037764
FBgn0039617	FBgn0039054	FBgn0010223	FBgn0039319	FBgn0033222	FBgn0036257	FBgn0033762	FBgn0010516	FBgn0039749	FBgn0010611	FBgn0032538	FBgn0038832
FBgn0039332	FBgn0030367	FBgn0034389	FBgn0033541	FBgn0051997	FBgn0051548	FBgn0032480	FBgn0025879	FBgn0000337	FBgn0012036	FBgn0037164	FBgn0032774
FBgn0030974	FBgn0259241	FBgn0011286	FBgn0034639	FBgn0032845	FBgn0030850	FBgn0039277	FBgn0032821	FBgn0064225	FBgn0003218	FBgn0014930	FBgn0003984
FBgn0261239	FBgn0001114	FBgn0050463	FBgn0259678	FBgn0036851	FBgn0035929	FBgn0037702	FBgn0035625	FBgn0053108	FBgn0020300	FBgn0020269	FBgn0040512
FBgn0028645	FBgn0035050	FBgn0031037	FBgn0001170	FBgn0013733	FBgn0040551	FBgn0000157	FBgn0260933	FBgn0086677	FBgn0031516	FBgn0004921	FBgn0035471
FBgn0004611	FBgn0050163	FBgn0004889	FBgn0001089	FBgn0033873	FBgn0035431	FBgn0035816	FBgn0038842	FBgn0037383	FBgn0036030	FBgn0031257	FBgn0011722
FBgn0039149	FBgn0039023	FBgn0086346	FBgn0027779	FBgn0004839	FBgn0010041	FBgn0051676	FBgn0259247	FBgn0030529	FBgn0033065	FBgn0038876	FBgn0038074
FBgn0031414	FBgn0039239	FBgn0037705	FBgn0032665	FBgn0052564	FBgn0032208	FBgn0031904	FBgn0032791	FBgn0259239	FBgn0031515	FBgn0051324	FBgn0041180
FBgn0035041	FBgn0031858	FBgn0033809	FBgn0011822	FBgn0031855	FBgn0039787	FBgn0259699	FBgn0000406	FBgn0085241	FBgn0039078	FBgn0029123	FBgn0030693
FBgn0051774	FBgn0035989	FBgn0035710	FBgn0000339	FBgn0031935	FBgn0031515	FBgn0085414	FBgn0030251	FBgn0016650	FBgn0050281	FBgn0035914	FBgn0050419
FBgn0029105	FBgn0031816	FBgn0020493	FBgn0037290	FBgn0029835	FBgn0039078	FBgn0039883	FBgn0027586	FBgn0027865	FBgn0039932	FBgn0034691	FBgn0031220
FBgn0032013	FBgn0028988	FBgn0035515	FBgn0040827	FBgn0037448	FBgn0039045	FBgn0031022	FBgn0039430	FBgn0013987	FBgn0034538	FBgn0013308	FBgn0032147
FBgn0260446	FBgn0033960	FBgn0033906	FBgn0034275	FBgn0032209	FBgn0039882	FBgn0002945	FBgn0001150	FBgn0033192	FBgn0030591	FBgn0035539	FBgn0027453
FBgn0020258	FBgn0002183	FBgn0013469	FBgn0033205	FBgn0050043	FBgn0012344	FBgn0261262	FBgn0035484	FBgn0038855	FBgn0037999	FBgn0014396	FBgn0026593
FBgn0038290	FBgn0036324	FBgn0030245	FBgn0040250	FBgn0037167	FBgn0034538	FBgn0028996	FBgn0000055	FBgn0050286	FBgn0030828	FBgn0032895	FBgn0034162
FBgn0027073	FBgn0001145	FBgn0052221	FBgn0038261	FBgn0029866	FBgn0024811	FBgn0038279	FBgn0038738	FBgn0032681	FBgn0031897	FBgn0029093	FBgn0031693
FBgn0259923	FBgn0259222	FBgn0003885	FBgn0030098	FBgn0036179	FBgn0031897	FBgn0040513	FBgn0261113	FBgn0014380	FBgn0004456	FBgn0260005	FBgn0041337
FBgn0032322	FBgn0085424	FBgn0036550	FBgn0040551	FBgn0259175	FBgn0025624	FBgn0261238	FBgn0000625	FBgn0031762	FBgn0030369	FBgn0036986	FBgn0039593
FBgn0029067	FBgn0039594	FBgn0034194	FBgn0039165	FBgn0035755	FBgn0004387	FBgn0085411	FBgn0001250	FBgn0030514	FBgn0031987	FBgn0020251	FBgn0052667
FBgn0033791	FBgn0032008	FBgn0039705	FBgn0038629	FBgn0051469	FBgn0001977	FBgn0039308	FBgn0259099	FBgn0028740	FBgn0025624	FBgn0004397	FBgn0034902
FBgn0259110	FBgn0038862	FBgn0043783	FBgn0031516	FBgn0034639	FBgn0030653	FBgn0051064	FBgn0030261	FBgn0034606	FBgn0030685	FBgn0040465	FBgn0030519
FBgn0030358	FBgn0028526	FBgn0260658	FBgn0035431	FBgn0259678	FBgn0086708	FBgn0023524	FBgn0085407	FBgn0000592	FBgn0001248	FBgn0020307	FBgn0034394
FBgn0033739	FBgn0261090	FBgn0051997	FBgn0010041	FBgn0051217	FBgn0031566	FBgn0032048	FBgn0030052	FBgn0038858	FBgn0039152	FBgn0033649	FBgn0030674
FBgn0022764	FBgn0004880	FBgn0032845	FBgn0039154	FBgn0027779	FBgn0016701	FBgn0011746	FBgn0038610	FBgn0011336	FBgn0053138	FBgn0034439	FBgn0002940
FBgn0013334	FBgn0028704	FBgn0039914	FBgn0058198	FBgn0037744	FBgn0038381	FBgn0039054	FBgn0032615	FBgn0036662	FBgn0050197	FBgn0029932	FBgn0052638
FBgn0034387	FBgn0053978	FBgn0013733	FBgn0040364	FBgn0032665	FBgn0053281	FBgn0002723	FBgn0033250	FBgn0030360	FBgn0032001	FBgn0000370	FBgn0050151
FBgn0037660	FBgn0053202	FBgn0085442	FBgn0031515	FBgn0259163	FBgn0052750	FBgn0035050	FBgn0033654	FBgn0030617	FBgn0052750	FBgn0003475	FBgn0260486
FBgn0033368	FBgn0024963	FBgn0038475	FBgn0039078	FBgn0037290	FBgn0031004	FBgn0030100	FBgn0051146	FBgn0029837	FBgn0037764	FBgn0016081	FBgn0054003
FBgn0010774	FBgn0024326	FBgn0031855	FBgn0052053	FBgn0051445	FBgn0053258	FBgn0032059	FBgn0029723	FBgn0039300	FBgn0001087	FBgn0051189	FBgn0261394
FBgn0033762	FBgn0033133	FBgn0037448	FBgn0039045	FBgn0020236	FBgn0003984	FBgn0032656	FBgn0037288	FBgn0014930	FBgn0032774	FBgn0029892	FBgn0030257
FBgn0032480	FBgn0011282	FBgn0037167	FBgn0039882	FBgn0037534	FBgn0026374	FBgn0085419	FBgn0030318	FBgn0029771	FBgn0040512	FBgn0001404	FBgn0031092
FBgn0039277	FBgn0030234	FBgn0036921	FBgn0028949	FBgn0028734	FBgn0030693	FBgn0085391	FBgn0033702	FBgn0000055	FBgn0020389	FBgn0040322	FBgn0033127
FBgn0037702	FBgn0036698	FBgn0029866	FBgn0031034	FBgn0040250	FBgn0039310	FBgn0031858	FBgn0036824	FBgn0036469	FBgn0037743	FBgn0030051	FBgn0037917
FBgn0000157	FBgn0039749	FBgn0036179	FBgn0039342	FBgn0035696	FBgn0259749	FBgn0035989	FBgn0040606	FBgn0028670	FBgn0035471	FBgn0030791	FBgn0025352
FBgn0035816	FBgn0000337	FBgn0259175	FBgn0031159	FBgn0053196	FBgn0036066	FBgn0037890	FBgn0034094	FBgn0033663	FBgn0011722	FBgn0040734	FBgn0039595
FBgn0051676	FBgn0042119	FBgn0035755	FBgn0050495	FBgn0035523	FBgn0032147	FBgn0051352	FBgn0015222	FBgn0032095	FBgn0038074	FBgn0039064	FBgn0032292
FBgn0259699	FBgn0029514	FBgn0051469	FBgn0031571	FBgn0003218	FBgn0026593	FBgn0031816	FBgn0039525	FBgn0035024	FBgn0030693	FBgn0026147	FBgn0014010
FBgn0039883	FBgn0083949	FBgn0260874	FBgn0025624	FBgn0086906	FBgn0034542	FBgn0037487	FBgn0033367	FBgn0029123	FBgn0000229	FBgn0261046	FBgn0030648
FBgn0000659	FBgn0021979	FBgn0051217	FBgn0004892	FBgn0040551	FBgn0001253	FBgn0015400	FBgn0034329	FBgn0029878	FBgn0031220	FBgn0024734	FBgn0033446
FBgn0038938	FBgn0003093	FBgn0037744	FBgn0034662	FBgn0035444	FBgn0039593	FBgn0033382	FBgn0039738	FBgn0034582	FBgn0001189	FBgn0038596	FBgn0259224
FBgn0051229	FBgn0086677	FBgn0034966	FBgn0052982	FBgn0030244	FBgn0029849	FBgn0033960	FBgn0052791	FBgn0036843	FBgn0026593	FBgn0259927	FBgn0032810
FBgn0002945	FBgn0030593	FBgn0003731	FBgn0032336	FBgn0033753	FBgn0036501	FBgn0002183	FBgn0085405	FBgn0261090	FBgn0034162	FBgn0001124	FBgn0020545
FBgn0261262	FBgn0027296	FBgn0023516	FBgn0052750	FBgn0058198	FBgn0033564	FBgn0039528	FBgn0038129	FBgn0014396	FBgn0034542	FBgn0260487	FBgn0034392
FBgn0028996	FBgn0035610	FBgn0028658	FBgn0031004	FBgn0040364	FBgn0052843	FBgn0001145	FBgn0037387	FBgn0022160	FBgn0031693	FBgn0039157	FBgn0011361
FBgn0038279	FBgn0016650	FBgn0051445	FBgn0259237	FBgn0039078	FBgn0033397	FBgn0052226	FBgn0038744	FBgn0052626	FBgn0041337	FBgn0064237	FBgn0038147
FBgn0040513	FBgn0033985	FBgn0036417	FBgn0050047	FBgn0039045	FBgn0086909	FBgn0259222	FBgn0025631	FBgn0038810	FBgn0039593	FBgn0025625	FBgn0038533
FBgn0261238	FBgn0259233	FBgn0020236	FBgn0038832	FBgn0039882	FBgn0014184	FBgn0026379	FBgn0028371	FBgn0004397	FBgn0052667	FBgn0036198	FBgn0052521
FBgn0039308	FBgn0025702	FBgn0037534	FBgn0033999	FBgn0260006	FBgn0038407	FBgn0030795	FBgn0035977	FBgn0050463	FBgn0033564	FBgn0260003	FBgn0037636
FBgn0051064	FBgn0036939	FBgn0028734	FBgn0026374	FBgn0030574	FBgn0259214	FBgn0035099	FBgn0259212	FBgn0029932	FBgn0031970	FBgn0004513	FBgn0036446
FBgn0023524	FBgn0033744	FBgn0035696	FBgn0039310	FBgn0261261	FBgn0085411	FBgn0031985	FBgn0035317	FBgn0000370	FBgn0034902	FBgn0036451	FBgn0035112
FBgn0005536	FBgn0033817	FBgn0259242	FBgn0259749	FBgn0032230	FBgn0037917	FBgn0027498	FBgn0015570	FBgn0013272	FBgn0030519	FBgn0023076	FBgn0040733
FBgn0032048	FBgn0035293	FBgn0020299	FBgn0036066	FBgn0038173	FBgn0039595	FBgn0050077	FBgn0034136	FBgn0016078	FBgn0030502	FBgn0035829	FBgn0035726
FBgn0037261	FBgn0028740	FBgn0053196	FBgn0085399	FBgn0030591	FBgn0014010	FBgn0024995	FBgn0037230	FBgn0030964	FBgn0053531	FBgn0033980	FBgn0031940
FBgn0011746	FBgn0004858	FBgn0003218	FBgn0001189	FBgn0036433	FBgn0036702	FBgn0042696	FBgn0040531	FBgn0035827	FBgn0034394	FBgn0039911	FBgn0036820
FBgn0039054	FBgn0034606	FBgn0040551	FBgn0050392	FBgn0021967	FBgn0030746	FBgn0261090	FBgn0035978	FBgn0030791	FBgn0011016	FBgn0019982	FBgn0029838
FBgn0259241	FBgn0034140	FBgn0020300	FBgn0031693	FBgn0000044	FBgn0030503	FBgn0035385	FBgn0027563	FBgn0039068	FBgn0002940	FBgn0043362	FBgn0029975
FBgn0002723	FBgn0038858	FBgn0039165	FBgn0040723	FBgn0050495	FBgn0030648	FBgn0004880	FBgn0032402	FBgn0035734	FBgn0030799	FBgn0032472	FBgn0052369
FBgn0035050	FBgn0033170	FBgn0259143	FBgn0039593	FBgn0036106	FBgn0020545	FBgn0028704	FBgn0020416	FBgn0261046	FBgn0050151	FBgn0030665	FBgn0028523
FBgn0030100	FBgn0000715	FBgn0058198	FBgn0036501	FBgn0004456	FBgn0032015	FBgn0053978	FBgn0031474	FBgn0032499	FBgn0054003	FBgn0032138	FBgn0033304
FBgn0032059	FBgn0030360	FBgn0031515	FBgn0027341	FBgn0031649	FBgn0034392	FBgn0053202	FBgn0036665	FBgn0037351	FBgn0031092	FBgn0037270	FBgn0027611
FBgn0032656	FBgn0038516	FBgn0039078	FBgn0052843	FBgn0030369	FBgn0033113	FBgn0024963	FBgn0031771	FBgn0050115	FBgn0039102	FBgn0261049	FBgn0036211
FBgn0085419	FBgn0030617	FBgn0032129	FBgn0030519	FBgn0031987	FBgn0037818	FBgn0026787	FBgn0034497	FBgn0243512	FBgn0032746	FBgn0000121	FBgn0036813
FBgn0063649	FBgn0029837	FBgn0030870	FBgn0034394	FBgn0032017	FBgn0034215	FBgn0029895	FBgn0052451	FBgn0033751	FBgn0025352	FBgn0002567	FBgn0024293
FBgn0085391	FBgn0037164	FBgn0039932	FBgn0030799	FBgn0025624	FBgn0033139	FBgn0024326	FBgn0037213	FBgn0039291	FBgn0029768	FBgn0026370	FBgn0036157
FBgn0031858	FBgn0014930	FBgn0039882	FBgn0003067	FBgn0052982	FBgn0038533	FBgn0033133	FBgn0039099	FBgn0259927	FBgn0086691	FBgn0036725	FBgn0038980
FBgn0035989	FBgn0029771	FBgn0260006	FBgn0051104	FBgn0052694	FBgn0028336	FBgn0004577	FBgn0035677	FBgn0001124	FBgn0030648	FBgn0001235	FBgn0029507
FBgn0037890	FBgn0020269	FBgn0030574	FBgn0038482	FBgn0004892	FBgn0031950	FBgn0033194	FBgn0030341	FBgn0051040	FBgn0033446	FBgn0003295	FBgn0035649
FBgn0051352	FBgn0031257	FBgn0000119	FBgn0039595	FBgn0086708	FBgn0036820	FBgn0034304	FBgn0039678	FBgn0004687	FBgn0032810	FBgn0034184	FBgn0085419
FBgn0031816	FBgn0053696	FBgn0032230	FBgn0040730	FBgn0034662	FBgn0033304	FBgn0052736	FBgn0039030	FBgn0051098	FBgn0020545	FBgn0041630	FBgn0001258
FBgn0015400	FBgn0050026	FBgn0024811	FBgn0015336	FBgn0051675	FBgn0039580	FBgn0000337	FBgn0025391	FBgn0036040	FBgn0011361	FBgn0259173	FBgn0020391
FBgn0033960	FBgn0013433	FBgn0033257	FBgn0030746	FBgn0050197	FBgn0039043	FBgn0029514	FBgn0259244	FBgn0039157	FBgn0038147	FBgn0023511	FBgn0028543
FBgn0002183	FBgn0051324	FBgn0036433	FBgn0031969	FBgn0039479	FBgn0038980	FBgn0083949	FBgn0035290	FBgn0085383	FBgn0034215	FBgn0051706	FBgn0085425
FBgn0039528	FBgn0029851	FBgn0037999	FBgn0040384	FBgn0000567	FBgn0029507	FBgn0015904	FBgn0033504	FBgn0038621	FBgn0033139	FBgn0032900	FBgn0036479
FBgn0001145	FBgn0259716	FBgn0000044	FBgn0030648	FBgn0050047	FBgn0003651	FBgn0021979	FBgn0037547	FBgn0025625	FBgn0052521	FBgn0026592	FBgn0013307
FBgn0052226	FBgn0029123	FBgn0030740	FBgn0259224	FBgn0032774	FBgn0261258	FBgn0053108	FBgn0016675	FBgn0032361	FBgn0035112	FBgn0026059	FBgn0037819
FBgn0259785	FBgn0035914	FBgn0050495	FBgn0034392	FBgn0004373	FBgn0085419	FBgn0037978	FBgn0038465	FBgn0036198	FBgn0040733	FBgn0037130	FBgn0034887
FBgn0004620	FBgn0035539	FBgn0031571	FBgn0033113	FBgn0053258	FBgn0036318	FBgn0000273	FBgn0262593	FBgn0045866	FBgn0035726	FBgn0039858	FBgn0036365
FBgn0003082	FBgn0020521	FBgn0003210	FBgn0038147	FBgn0003984	FBgn0033463	FBgn0003093	FBgn0037956	FBgn0023076	FBgn0036820	FBgn0260744	FBgn0041160
FBgn0259222	FBgn0014396	FBgn0004456	FBgn0037818	FBgn0040512	FBgn0001291	FBgn0086677	FBgn0036274	FBgn0031632	FBgn0029838	FBgn0250791	FBgn0003891
FBgn0085424	FBgn0259244	FBgn0031987	FBgn0033139	FBgn0085256	FBgn0039411	FBgn0027296	FBgn0033904	FBgn0000064	FBgn0029975	FBgn0002573	FBgn0021872
FBgn0026379	FBgn0000542	FBgn0004387	FBgn0038533	FBgn0035471	FBgn0020391	FBgn0035610	FBgn0011286	FBgn0035829	FBgn0034046	FBgn0030485	FBgn0032979
FBgn0030795	FBgn0032895	FBgn0001248	FBgn0025709	FBgn0041180	FBgn0260941	FBgn0033985	FBgn0027621	FBgn0038084	FBgn0052369	FBgn0031645	FBgn0033134
FBgn0031985	FBgn0085397	FBgn0052982	FBgn0040271	FBgn0036684	FBgn0028325	FBgn0259233	FBgn0036750	FBgn0028515	FBgn0033304	FBgn0038589	FBgn0032889
FBgn0001086	FBgn0032507	FBgn0052694	FBgn0015039	FBgn0039310	FBgn0035321	FBgn0025702	FBgn0000064	FBgn0043362	FBgn0027611	FBgn0038809	FBgn0003390
FBgn0027498	FBgn0038865	FBgn0086708	FBgn0039476	FBgn0034162	FBgn0032217	FBgn0033192	FBgn0031037	FBgn0030065	FBgn0036211	FBgn0032470	FBgn0038257
FBgn0050077	FBgn0001235	FBgn0051675	FBgn0042179	FBgn0031213	FBgn0039349	FBgn0033744	FBgn0040211	FBgn0026403	FBgn0035227	FBgn0013347	FBgn0040321
FBgn0026324	FBgn0260005	FBgn0050197	FBgn0031950	FBgn0029849	FBgn0038595	FBgn0035293	FBgn0028369	FBgn0030340	FBgn0024293	FBgn0035948	FBgn0052056
FBgn0030349	FBgn0036986	FBgn0000567	FBgn0031930	FBgn0036501	FBgn0038179	FBgn0031762	FBgn0036271	FBgn0030665	FBgn0036157	FBgn0016047	FBgn0038463
FBgn0024995	FBgn0040465	FBgn0051140	FBgn0036820	FBgn0027341	FBgn0013263	FBgn0037519	FBgn0012051	FBgn0003410	FBgn0085419	FBgn0026090	FBgn0004595
FBgn0042696	FBgn0034439	FBgn0032774	FBgn0033304	FBgn0030519	FBgn0041160	FBgn0030514	FBgn0005613	FBgn0037270	FBgn0001258	FBgn0028671	FBgn0034141
FBgn0261090	FBgn0003475	FBgn0004373	FBgn0027611	FBgn0086909	FBgn0003891	FBgn0028740	FBgn0033809	FBgn0025725	FBgn0039411	FBgn0035372	FBgn0025697
FBgn0035385	FBgn0051189	FBgn0003984	FBgn0036813	FBgn0053531	FBgn0032889	FBgn0032036	FBgn0043791	FBgn0024187	FBgn0086690	FBgn0031770	FBgn0010786
FBgn0044324	FBgn0259715	FBgn0040512	FBgn0039580	FBgn0004197	FBgn0020907	FBgn0000715	FBgn0035806	FBgn0026370	FBgn0027363	FBgn0022355	FBgn0050287
FBgn0004880	FBgn0033602	FBgn0085256	FBgn0029507	FBgn0038407	FBgn0000442	FBgn0029837	FBgn0035710	FBgn0004573	FBgn0050431	FBgn0010424	FBgn0028396
FBgn0028704	FBgn0040322	FBgn0035471	FBgn0003651	FBgn0052638	FBgn0026239	FBgn0029771	FBgn0025456	FBgn0036725	FBgn0028543	FBgn0001301	FBgn0028991
FBgn0039836	FBgn0033657	FBgn0041180	FBgn0036332	FBgn0050151	FBgn0034225	FBgn0020269	FBgn0038662	FBgn0030521	FBgn0038735	FBgn0002643	FBgn0040813
FBgn0039338	FBgn0030051	FBgn0243516	FBgn0052557	FBgn0030257	FBgn0000454	FBgn0032474	FBgn0003067	FBgn0014032	FBgn0013307	FBgn0028494	FBgn0016797
FBgn0053978	FBgn0040734	FBgn0036684	FBgn0085419	FBgn0033127	FBgn0038257	FBgn0031257	FBgn0035087	FBgn0030435	FBgn0037819	FBgn0003091	FBgn0003721
FBgn0053202	FBgn0039064	FBgn0259211	FBgn0036318	FBgn0037917	FBgn0052056	FBgn0053696	FBgn0024189	FBgn0035166	FBgn0034887	FBgn0035695	FBgn0039737
FBgn0024963	FBgn0032835	FBgn0031220	FBgn0001258	FBgn0039595	FBgn0030946	FBgn0027567	FBgn0024740	FBgn0259173	FBgn0041160	FBgn0030973	FBgn0036101
FBgn0029895	FBgn0260487	FBgn0001189	FBgn0260941	FBgn0039807	FBgn0031633	FBgn0013433	FBgn0050008	FBgn0023511	FBgn0021872	FBgn0032202	FBgn0034756
FBgn0024326	FBgn0261046	FBgn0001253	FBgn0027363	FBgn0015336	FBgn0038463	FBgn0051324	FBgn0043783	FBgn0085390	FBgn0039290	FBgn0025879	FBgn0032881
FBgn0033133	FBgn0051313	FBgn0034542	FBgn0039349	FBgn0014010	FBgn0032913	FBgn0029851	FBgn0033903	FBgn0050091	FBgn0050343	FBgn0032821	FBgn0050195
FBgn0034304	FBgn0038596	FBgn0034485	FBgn0038595	FBgn0030746	FBgn0260943	FBgn0029123	FBgn0051997	FBgn0032900	FBgn0023023	FBgn0063496	FBgn0026872
FBgn0259168	FBgn0032343	FBgn0052333	FBgn0038431	FBgn0023172	FBgn0035589	FBgn0035914	FBgn0036851	FBgn0026059	FBgn0026415	FBgn0035625	FBgn0034059
FBgn0029514	FBgn0037975	FBgn0029849	FBgn0021872	FBgn0030648	FBgn0033259	FBgn0034691	FBgn0013733	FBgn0028475	FBgn0032889	FBgn0260933	FBgn0014343
FBgn0021979	FBgn0004552	FBgn0027341	FBgn0039290	FBgn0259224	FBgn0051472	FBgn0036843	FBgn0053526	FBgn0039858	FBgn0050203	FBgn0028552	FBgn0014388
FBgn0053108	FBgn0014033	FBgn0038202	FBgn0051323	FBgn0020545	FBgn0028991	FBgn0259244	FBgn0037391	FBgn0002622	FBgn0003390	FBgn0086778	FBgn0034897
FBgn0037978	FBgn0033110	FBgn0034902	FBgn0051300	FBgn0034392	FBgn0016797	FBgn0032895	FBgn0031935	FBgn0002573	FBgn0038257	FBgn0000406	FBgn0260855
FBgn0000273	FBgn0064237	FBgn0052843	FBgn0032889	FBgn0011361	FBgn0034756	FBgn0003656	FBgn0032209	FBgn0044452	FBgn0040321	FBgn0029663	FBgn0037163
FBgn0003093	FBgn0030361	FBgn0030519	FBgn0035476	FBgn0033139	FBgn0039877	FBgn0032507	FBgn0032297	FBgn0034005	FBgn0051713	FBgn0030251	FBgn0031466
FBgn0086677	FBgn0025625	FBgn0035065	FBgn0030929	FBgn0032140	FBgn0030724	FBgn0260005	FBgn0037167	FBgn0031818	FBgn0038463	FBgn0030600	FBgn0013949
FBgn0004587	FBgn0004513	FBgn0052638	FBgn0034225	FBgn0038533	FBgn0032881	FBgn0036986	FBgn0003076	FBgn0033391	FBgn0040340	FBgn0027586	FBgn0033710
FBgn0027296	FBgn0038084	FBgn0050151	FBgn0038257	FBgn0040271	FBgn0029761	FBgn0020251	FBgn0029866	FBgn0037758	FBgn0034141	FBgn0039430	FBgn0027610
FBgn0032901	FBgn0033980	FBgn0260486	FBgn0032049	FBgn0015039	FBgn0026872	FBgn0040465	FBgn0035144	FBgn0036978	FBgn0025697	FBgn0001138	FBgn0025885
FBgn0030648	FBgn0039911	FBgn0036529	FBgn0034988	FBgn0036446	FBgn0259977	FBgn0020307	FBgn0259175	FBgn0039359	FBgn0010786	FBgn0031315	FBgn0053120
FBgn0035610	FBgn0043362	FBgn0030257	FBgn0038098	FBgn0028500	FBgn0031244	FBgn0030366	FBgn0036659	FBgn0053080	FBgn0028396	FBgn0033924	FBgn0038577
FBgn0016650	FBgn0026403	FBgn0031092	FBgn0030946	FBgn0029975	FBgn0034897	FBgn0003475	FBgn0035755	FBgn0036877	FBgn0034061	FBgn0000625	FBgn0050148
FBgn0027865	FBgn0032472	FBgn0033127	FBgn0053468	FBgn0033304	FBgn0038658	FBgn0016078	FBgn0051469	FBgn0032470	FBgn0032285	FBgn0259099	FBgn0038261
FBgn0033985	FBgn0030665	FBgn0039102	FBgn0034141	FBgn0085427	FBgn0051097	FBgn0001404	FBgn0259678	FBgn0016047	FBgn0036101	FBgn0029524	FBgn0032689
FBgn0259233	FBgn0039754	FBgn0025352	FBgn0039316	FBgn0036211	FBgn0259244	FBgn0033657	FBgn0051217	FBgn0043903	FBgn0034756	FBgn0030261	FBgn0030041
FBgn0085421	FBgn0000121	FBgn0039595	FBgn0260943	FBgn0039043	FBgn0000251	FBgn0030791	FBgn0037744	FBgn0034443	FBgn0039877	FBgn0038610	FBgn0014000
FBgn0025702	FBgn0002567	FBgn0051635	FBgn0031289	FBgn0024293	FBgn0004893	FBgn0039064	FBgn0034966	FBgn0028671	FBgn0030724	FBgn0024986	FBgn0035911
FBgn0033192	FBgn0026370	FBgn0014010	FBgn0025697	FBgn0038980	FBgn0027548	FBgn0026147	FBgn0003731	FBgn0030474	FBgn0032881	FBgn0033250	FBgn0003206
FBgn0050286	FBgn0004573	FBgn0038606	FBgn0030777	FBgn0036834	FBgn0027610	FBgn0261046	FBgn0037001	FBgn0000273	FBgn0000395	FBgn0259878	FBgn0250788
FBgn0033744	FBgn0036725	FBgn0030648	FBgn0034061	FBgn0035649	FBgn0000535	FBgn0033751	FBgn0051445	FBgn0035372	FBgn0026872	FBgn0001122	FBgn0037895
FBgn0035293	FBgn0003295	FBgn0020545	FBgn0051472	FBgn0261258	FBgn0016917	FBgn0038596	FBgn0037534	FBgn0035785	FBgn0034059	FBgn0010772	FBgn0010473
FBgn0032681	FBgn0259173	FBgn0037636	FBgn0032285	FBgn0085419	FBgn0039588	FBgn0032343	FBgn0028955	FBgn0035944	FBgn0014343	FBgn0038282	FBgn0035849
FBgn0031628	FBgn0051706	FBgn0040271	FBgn0051975	FBgn0036318	FBgn0005616	FBgn0259927	FBgn0038261	FBgn0001185	FBgn0027341	FBgn0029525	FBgn0250819
FBgn0031762	FBgn0035049	FBgn0015039	FBgn0034756	FBgn0001258	FBgn0030218	FBgn0004552	FBgn0259242	FBgn0015795	FBgn0015737	FBgn0029723	FBgn0030157
FBgn0028740	FBgn0039703	FBgn0036446	FBgn0039298	FBgn0020391	FBgn0025724	FBgn0001124	FBgn0020299	FBgn0012037	FBgn0028479	FBgn0033627	FBgn0031973
FBgn0034606	FBgn0026592	FBgn0035410	FBgn0050195	FBgn0260941	FBgn0037100	FBgn0051098	FBgn0053196	FBgn0010424	FBgn0037163	FBgn0037288	FBgn0033880
FBgn0001085	FBgn0036984	FBgn0029975	FBgn0000395	FBgn0039349	FBgn0038261	FBgn0039157	FBgn0031251	FBgn0040793	FBgn0033814	FBgn0026616	FBgn0028490
FBgn0032036	FBgn0037130	FBgn0052369	FBgn0259977	FBgn0041210	FBgn0011296	FBgn0085383	FBgn0012036	FBgn0037326	FBgn0259244	FBgn0052423	FBgn0052196
FBgn0015396	FBgn0051183	FBgn0085427	FBgn0031244	FBgn0036365	FBgn0033356	FBgn0030361	FBgn0040551	FBgn0037358	FBgn0013949	FBgn0039561	FBgn0035813
FBgn0000715	FBgn0260744	FBgn0036211	FBgn0085440	FBgn0041160	FBgn0064766	FBgn0025625	FBgn0020300	FBgn0028494	FBgn0035477	FBgn0040606	FBgn0039151
FBgn0026575	FBgn0030467	FBgn0039719	FBgn0038414	FBgn0003891	FBgn0052547	FBgn0004513	FBgn0034509	FBgn0040623	FBgn0027548	FBgn0034381	FBgn0040064
FBgn0029837	FBgn0259214	FBgn0039043	FBgn0014388	FBgn0021872	FBgn0023510	FBgn0010415	FBgn0038629	FBgn0004867	FBgn0033710	FBgn0015609	FBgn0015221
FBgn0029771	FBgn0250791	FBgn0011739	FBgn0002522	FBgn0033134	FBgn0033502	FBgn0036451	FBgn0030244	FBgn0015772	FBgn0027610	FBgn0003520	FBgn0001257
FBgn0020269	FBgn0030485	FBgn0024293	FBgn0040850	FBgn0051323	FBgn0087035	FBgn0036333	FBgn0033065	FBgn0032202	FBgn0030512	FBgn0034094	FBgn0034396
FBgn0032474	FBgn0031645	FBgn0036834	FBgn0037163	FBgn0051300	FBgn0027339	FBgn0031961	FBgn0034389	FBgn0038115	FBgn0016917	FBgn0004395	FBgn0040513
FBgn0031257	FBgn0038589	FBgn0035649	FBgn0037853	FBgn0023023	FBgn0035849	FBgn0035829	FBgn0031515	FBgn0086690	FBgn0053120	FBgn0010905	FBgn0022710
FBgn0053696	FBgn0038809	FBgn0261258	FBgn0038135	FBgn0026415	FBgn0051729	FBgn0038084	FBgn0039078	FBgn0010352	FBgn0038577	FBgn0039525	FBgn0044047
FBgn0036259	FBgn0053080	FBgn0085419	FBgn0004893	FBgn0003390	FBgn0261020	FBgn0033980	FBgn0032129	FBgn0025879	FBgn0015576	FBgn0039738	FBgn0034117
FBgn0027567	FBgn0031814	FBgn0036318	FBgn0032018	FBgn0000442	FBgn0052196	FBgn0039911	FBgn0050281	FBgn0032821	FBgn0050148	FBgn0011661	FBgn0033742
FBgn0013433	FBgn0032470	FBgn0001291	FBgn0032387	FBgn0035815	FBgn0034191	FBgn0029175	FBgn0039932	FBgn0260933	FBgn0261108	FBgn0029573	FBgn0030926
FBgn0030206	FBgn0035948	FBgn0001258	FBgn0014342	FBgn0051100	FBgn0035813	FBgn0043362	FBgn0034538	FBgn0038842	FBgn0040529	FBgn0011584	FBgn0030941
FBgn0051324	FBgn0031065	FBgn0086690	FBgn0011556	FBgn0038257	FBgn0032084	FBgn0038453	FBgn0032230	FBgn0037846	FBgn0011296	FBgn0025631	FBgn0038076
FBgn0029123	FBgn0028671	FBgn0260941	FBgn0035499	FBgn0034988	FBgn0040064	FBgn0030665	FBgn0052815	FBgn0047178	FBgn0030041	FBgn0259228	FBgn0027544
FBgn0035914	FBgn0035785	FBgn0000667	FBgn0050480	FBgn0039316	FBgn0022710	FBgn0003410	FBgn0036433	FBgn0053169	FBgn0014000	FBgn0037849	FBgn0001128
FBgn0034691	FBgn0031770	FBgn0035321	FBgn0040297	FBgn0260943	FBgn0003716	FBgn0037270	FBgn0039348	FBgn0027597	FBgn0035911	FBgn0027101	FBgn0039209
FBgn0036843	FBgn0022355	FBgn0041210	FBgn0053120	FBgn0051472	FBgn0011656	FBgn0024187	FBgn0021967	FBgn0030088	FBgn0052850	FBgn0028371	FBgn0039938
FBgn0259244	FBgn0010424	FBgn0085425	FBgn0039471	FBgn0016797	FBgn0004359	FBgn0026370	FBgn0030828	FBgn0086605	FBgn0052626	FBgn0013467	FBgn0035623
FBgn0032895	FBgn0001301	FBgn0013263	FBgn0259998	FBgn0003721	FBgn0036005	FBgn0004573	FBgn0032222	FBgn0038360	FBgn0087035	FBgn0034788	FBgn0030239
FBgn0003656	FBgn0002643	FBgn0036365	FBgn0040636	FBgn0036101	FBgn0003557	FBgn0036725	FBgn0026086	FBgn0034697	FBgn0010473	FBgn0029974	FBgn0053156
FBgn0032507	FBgn0028494	FBgn0041160	FBgn0011296	FBgn0040068	FBgn0035375	FBgn0001235	FBgn0036106	FBgn0000625	FBgn0035849	FBgn0035207	FBgn0033777
FBgn0260005	FBgn0051708	FBgn0003891	FBgn0035371	FBgn0034756	FBgn0033777	FBgn0004875	FBgn0036264	FBgn0259099	FBgn0032166	FBgn0035676	FBgn0038250
FBgn0036986	FBgn0003091	FBgn0021872	FBgn0030847	FBgn0015766	FBgn0039107	FBgn0033038	FBgn0039820	FBgn0037614	FBgn0030157	FBgn0087012	FBgn0031055
FBgn0020251	FBgn0031630	FBgn0038839	FBgn0052547	FBgn0039298	FBgn0037517	FBgn0003295	FBgn0030369	FBgn0050446	FBgn0031973	FBgn0033031	FBgn0040832
FBgn0040465	FBgn0035695	FBgn0050343	FBgn0034293	FBgn0032881	FBgn0085446	FBgn0034184	FBgn0066293	FBgn0085407	FBgn0028490	FBgn0037230	FBgn0043578
FBgn0020307	FBgn0038115	FBgn0033134	FBgn0023510	FBgn0050195	FBgn0038890	FBgn0259173	FBgn0001248	FBgn0000015	FBgn0052196	FBgn0259111	FBgn0039114
FBgn0038872	FBgn0025879	FBgn0051323	FBgn0033502	FBgn0000395	FBgn0032373	FBgn0051706	FBgn0053110	FBgn0024986	FBgn0035813	FBgn0050101	FBgn0036876
FBgn0030366	FBgn0032821	FBgn0038294	FBgn0250788	FBgn0026872	FBgn0029170	FBgn0085390	FBgn0052694	FBgn0036211	FBgn0039151	FBgn0027563	FBgn0039690
FBgn0003475	FBgn0063496	FBgn0023023	FBgn0032166	FBgn0259977	FBgn0040069	FBgn0035101	FBgn0086708	FBgn0037720	FBgn0040285	FBgn0052278	FBgn0039411
FBgn0016078	FBgn0034013	FBgn0003390	FBgn0259167	FBgn0031244	FBgn0036876	FBgn0050091	FBgn0053138	FBgn0010772	FBgn0040064	FBgn0032402	FBgn0029813
FBgn0001404	FBgn0260933	FBgn0035815	FBgn0032938	FBgn0085440	FBgn0052368	FBgn0026592	FBgn0051675	FBgn0052532	FBgn0001297	FBgn0020416	FBgn0029134
FBgn0033657	FBgn0028552	FBgn0050460	FBgn0261020	FBgn0040850	FBgn0037491	FBgn0036984	FBgn0050197	FBgn0039462	FBgn0015221	FBgn0039748	FBgn0053056
FBgn0030791	FBgn0031424	FBgn0052056	FBgn0052196	FBgn0025632	FBgn0014009	FBgn0037130	FBgn0035046	FBgn0029723	FBgn0001257	FBgn0031474	FBgn0004797
FBgn0039064	FBgn0086778	FBgn0039316	FBgn0015765	FBgn0031466	FBgn0010651	FBgn0051183	FBgn0032001	FBgn0033627	FBgn0040513	FBgn0260658	FBgn0014009
FBgn0026147	FBgn0000406	FBgn0260943	FBgn0033582	FBgn0004893	FBgn0035300	FBgn0030467	FBgn0000567	FBgn0051072	FBgn0022710	FBgn0037899	FBgn0052843
FBgn0261046	FBgn0029663	FBgn0051472	FBgn0040285	FBgn0027548	FBgn0032456	FBgn0039581	FBgn0052750	FBgn0030318	FBgn0044047	FBgn0004511	FBgn0260400
FBgn0033751	FBgn0031692	FBgn0033212	FBgn0015221	FBgn0027610	FBgn0032682	FBgn0259214	FBgn0037764	FBgn0040337	FBgn0034117	FBgn0034931	FBgn0010651
FBgn0038596	FBgn0030251	FBgn0036101	FBgn0035146	FBgn0032018	FBgn0004179	FBgn0250791	FBgn0032774	FBgn0031980	FBgn0033742	FBgn0035677	FBgn0035076
FBgn0032343	FBgn0030600	FBgn0034756	FBgn0035517	FBgn0011556	FBgn0031384	FBgn0260745	FBgn0027074	FBgn0037014	FBgn0030926	FBgn0002576	FBgn0038570
FBgn0259927	FBgn0027586	FBgn0015766	FBgn0259246	FBgn0000535	FBgn0038733	FBgn0033391	FBgn0040512	FBgn0037092	FBgn0036899	FBgn0033936	FBgn0002930
FBgn0004552	FBgn0037107	FBgn0039298	FBgn0022710	FBgn0035499	FBgn0030615	FBgn0037758	FBgn0035171	FBgn0031081	FBgn0038076	FBgn0005677	FBgn0031384
FBgn0260487	FBgn0001150	FBgn0032881	FBgn0038613	FBgn0005616	FBgn0015524	FBgn0030485	FBgn0035471	FBgn0050015	FBgn0027544	FBgn0038819	FBgn0052296
FBgn0085383	FBgn0035484	FBgn0050195	FBgn0036899	FBgn0025885	FBgn0030452	FBgn0038809	FBgn0011722	FBgn0033381	FBgn0039209	FBgn0033504	FBgn0051778
FBgn0029834	FBgn0033924	FBgn0034059	FBgn0035619	FBgn0015576	FBgn0083940	FBgn0028979	FBgn0038074	FBgn0033468	FBgn0039938	FBgn0029664	FBgn0031389
FBgn0030361	FBgn0000625	FBgn0259977	FBgn0038076	FBgn0040636	FBgn0033402	FBgn0028675	FBgn0041180	FBgn0030447	FBgn0030239	FBgn0038725	FBgn0030452
FBgn0025625	FBgn0259099	FBgn0031244	FBgn0003557	FBgn0000489	FBgn0038195	FBgn0053080	FBgn0259211	FBgn0029737	FBgn0053156	FBgn0036285	FBgn0030029
FBgn0004513	FBgn0015591	FBgn0085440	FBgn0003721	FBgn0040529	FBgn0035482	FBgn0031814	FBgn0031220	FBgn0001994	FBgn0038250	FBgn0038465	FBgn0038195
FBgn0010415	FBgn0050446	FBgn0034897	FBgn0035375	FBgn0030997	FBgn0051075	FBgn0035948	FBgn0034996	FBgn0031285	FBgn0031055	FBgn0037956	FBgn0025682
FBgn0036451	FBgn0030261	FBgn0260971	FBgn0039474	FBgn0031562	FBgn0038460	FBgn0031065	FBgn0053970	FBgn0004395	FBgn0040832	FBgn0039681	FBgn0011576
FBgn0036333	FBgn0085407	FBgn0015737	FBgn0037612	FBgn0030847	FBgn0260635	FBgn0028671	FBgn0026593	FBgn0038272	FBgn0085446	FBgn0010422	FBgn0086365
FBgn0038084	FBgn0038610	FBgn0037163	FBgn0027844	FBgn0035985	FBgn0011576	FBgn0030474	FBgn0034162	FBgn0033875	FBgn0043578	FBgn0029950	FBgn0040398
FBgn0039911	FBgn0033250	FBgn0037853	FBgn0033777	FBgn0034293	FBgn0033352	FBgn0035785	FBgn0034542	FBgn0039738	FBgn0039114	FBgn0027608	FBgn0037057
FBgn0029175	FBgn0001122	FBgn0025632	FBgn0039107	FBgn0052850	FBgn0035715	FBgn0031817	FBgn0031693	FBgn0052791	FBgn0036876	FBgn0023129	FBgn0086372
FBgn0043362	FBgn0038542	FBgn0004893	FBgn0032069	FBgn0003206	FBgn0002973	FBgn0001185	FBgn0001253	FBgn0037442	FBgn0039690	FBgn0040074	FBgn0033698
FBgn0035558	FBgn0038282	FBgn0027548	FBgn0037517	FBgn0250788	FBgn0028916	FBgn0031770	FBgn0038236	FBgn0011661	FBgn0030478	FBgn0004889	FBgn0038450
FBgn0038453	FBgn0029525	FBgn0035499	FBgn0031741	FBgn0034583	FBgn0061515	FBgn0022355	FBgn0041337	FBgn0037387	FBgn0053056	FBgn0028369	FBgn0032213
FBgn0003410	FBgn0029723	FBgn0040297	FBgn0040832	FBgn0027339	FBgn0052177	FBgn0031194	FBgn0039593	FBgn0011584	FBgn0004797	FBgn0037705	FBgn0030351
FBgn0261049	FBgn0033627	FBgn0014006	FBgn0085446	FBgn0010105	FBgn0037057	FBgn0010424	FBgn0036501	FBgn0025631	FBgn0014009	FBgn0043791	FBgn0033246
FBgn0024187	FBgn0037288	FBgn0000489	FBgn0035667	FBgn0032166	FBgn0032170	FBgn0004587	FBgn0052667	FBgn0259228	FBgn0010651	FBgn0011586	FBgn0031428
FBgn0026370	FBgn0030318	FBgn0030997	FBgn0054026	FBgn0031973	FBgn0016123	FBgn0001301	FBgn0033564	FBgn0037849	FBgn0035076	FBgn0020493	FBgn0038299
FBgn0004573	FBgn0053639	FBgn0019662	FBgn0032373	FBgn0033582	FBgn0033448	FBgn0002643	FBgn0031970	FBgn0016081	FBgn0038570	FBgn0027589	FBgn0039930
FBgn0026597	FBgn0260660	FBgn0030847	FBgn0035769	FBgn0035517	FBgn0035583	FBgn0039260	FBgn0027341	FBgn0028371	FBgn0002930	FBgn0038653	FBgn0038984
FBgn0036725	FBgn0026616	FBgn0035985	FBgn0040069	FBgn0022710	FBgn0031174	FBgn0028494	FBgn0034902	FBgn0259212	FBgn0031635	FBgn0004619	FBgn0259140
FBgn0037831	FBgn0052423	FBgn0003206	FBgn0024232	FBgn0038803	FBgn0031428	FBgn0051708	FBgn0003071	FBgn0034788	FBgn0031384	FBgn0036255	FBgn0037835
FBgn0001235	FBgn0037014	FBgn0250788	FBgn0038307	FBgn0036899	FBgn0033212	FBgn0003091	FBgn0022359	FBgn0035317	FBgn0051778	FBgn0033356	FBgn0037396
FBgn0004875	FBgn0031081	FBgn0034583	FBgn0030478	FBgn0030941	FBgn0028662	FBgn0015772	FBgn0034394	FBgn0035676	FBgn0030615	FBgn0003885	FBgn0036821
FBgn0003295	FBgn0036824	FBgn0087035	FBgn0052368	FBgn0016059	FBgn0032801	FBgn0010825	FBgn0031228	FBgn0087012	FBgn0031389	FBgn0259918	FBgn0063497
FBgn0034184	FBgn0040606	FBgn0027339	FBgn0004228	FBgn0038076	FBgn0031514	FBgn0035695	FBgn0002940	FBgn0027563	FBgn0016797	FBgn0005614	FBgn0020255
FBgn0259173	FBgn0034381	FBgn0010105	FBgn0036996	FBgn0003557	FBgn0042102	FBgn0010453	FBgn0030799	FBgn0085354	FBgn0030029	FBgn0035157	FBgn0037146
FBgn0051706	FBgn0015609	FBgn0000658	FBgn0003360	FBgn0027844	FBgn0053099	FBgn0025879	FBgn0050151	FBgn0039748	FBgn0083940	FBgn0052099	FBgn0035203
FBgn0085390	FBgn0031285	FBgn0032166	FBgn0040959	FBgn0053156	FBgn0003660	FBgn0032821	FBgn0054003	FBgn0011274	FBgn0038195	FBgn0037336	FBgn0015575
FBgn0035101	FBgn0003520	FBgn0259167	FBgn0035300	FBgn0039107	FBgn0039861	FBgn0035625	FBgn0035877	FBgn0051715	FBgn0011768	FBgn0011280	FBgn0036121
FBgn0026592	FBgn0034094	FBgn0250819	FBgn0032456	FBgn0037517	FBgn0024509	FBgn0034013	FBgn0030257	FBgn0026411	FBgn0031012	FBgn0027598	FBgn0066101
FBgn0020617	FBgn0004395	FBgn0039113	FBgn0031384	FBgn0031741	FBgn0063497	FBgn0260933	FBgn0031092	FBgn0031865	FBgn0038460	FBgn0051997	FBgn0023550
FBgn0036984	FBgn0039915	FBgn0031973	FBgn0051145	FBgn0040832	FBgn0031824	FBgn0259247	FBgn0027291	FBgn0005613	FBgn0040089	FBgn0042185	FBgn0036760
FBgn0037130	FBgn0033367	FBgn0030400	FBgn0015524	FBgn0010620	FBgn0025633	FBgn0037846	FBgn0039102	FBgn0052451	FBgn0036053	FBgn0036851	FBgn0032908
FBgn0030467	FBgn0034329	FBgn0035813	FBgn0030452	FBgn0032373	FBgn0020255	FBgn0028552	FBgn0025352	FBgn0051562	FBgn0011576	FBgn0036896	FBgn0030608
FBgn0039581	FBgn0033875	FBgn0032084	FBgn0035482	FBgn0015524	FBgn0037146	FBgn0031424	FBgn0039807	FBgn0003941	FBgn0086365	FBgn0035060	FBgn0260011
FBgn0259214	FBgn0033696	FBgn0015765	FBgn0031012	FBgn0035769	FBgn0052407	FBgn0086778	FBgn0035711	FBgn0085433	FBgn0040398	FBgn0013733	FBgn0041710
FBgn0250791	FBgn0039738	FBgn0034396	FBgn0038460	FBgn0034399	FBgn0026319	FBgn0051897	FBgn0051635	FBgn0004511	FBgn0037057	FBgn0032796	FBgn0031294
FBgn0260745	FBgn0052791	FBgn0022710	FBgn0032433	FBgn0040069	FBgn0054010	FBgn0029663	FBgn0086691	FBgn0034931	FBgn0033698	FBgn0031855	FBgn0016126
FBgn0033391	FBgn0085405	FBgn0038803	FBgn0035715	FBgn0039114	FBgn0035176	FBgn0030600	FBgn0001128	FBgn0035677	FBgn0035309	FBgn0039487	FBgn0032813
FBgn0037758	FBgn0037442	FBgn0004359	FBgn0035309	FBgn0039690	FBgn0034366	FBgn0032858	FBgn0038606	FBgn0030341	FBgn0010313	FBgn0037448	FBgn0031538
FBgn0030485	FBgn0037387	FBgn0030941	FBgn0032170	FBgn0030478	FBgn0027601	FBgn0037107	FBgn0030648	FBgn0039664	FBgn0038450	FBgn0035756	FBgn0030309
FBgn0038589	FBgn0019650	FBgn0016059	FBgn0031190	FBgn0052368	FBgn0026056	FBgn0037134	FBgn0033446	FBgn0010747	FBgn0032213	FBgn0032297	FBgn0020385
FBgn0038809	FBgn0029573	FBgn0030035	FBgn0033448	FBgn0004228	FBgn0036760	FBgn0030648	FBgn0032810	FBgn0031377	FBgn0002543	FBgn0003248	FBgn0051157
FBgn0031814	FBgn0025631	FBgn0039938	FBgn0035583	FBgn0053056	FBgn0024555	FBgn0034083	FBgn0038147	FBgn0038903	FBgn0035583	FBgn0022959	FBgn0003116
FBgn0035948	FBgn0037849	FBgn0035544	FBgn0031174	FBgn0031564	FBgn0025381	FBgn0001138	FBgn0013718	FBgn0035308	FBgn0027339	FBgn0036921	FBgn0033308
FBgn0041092	FBgn0028371	FBgn0000046	FBgn0034588	FBgn0003090	FBgn0042135	FBgn0000055	FBgn0052521	FBgn0035290	FBgn0033246	FBgn0036179	FBgn0023507
FBgn0031065	FBgn0035977	FBgn0030239	FBgn0032253	FBgn0260400	FBgn0032813	FBgn0033924	FBgn0015039	FBgn0003339	FBgn0031428	FBgn0004587	FBgn0085474
FBgn0028671	FBgn0259212	FBgn0053156	FBgn0259140	FBgn0010651	FBgn0023507	FBgn0259099	FBgn0030733	FBgn0033504	FBgn0034928	FBgn0259175	FBgn0052758
FBgn0030474	FBgn0013467	FBgn0038250	FBgn0033212	FBgn0032234	FBgn0032587	FBgn0015591	FBgn0028336	FBgn0036932	FBgn0038299	FBgn0051469	FBgn0034706
FBgn0034346	FBgn0034788	FBgn0259678	FBgn0030984	FBgn0035300	FBgn0034706	FBgn0031575	FBgn0031734	FBgn0036937	FBgn0038984	FBgn0086675	FBgn0037709
FBgn0031817	FBgn0038732	FBgn0032505	FBgn0036232	FBgn0030761	FBgn0020647	FBgn0259166	FBgn0031294	FBgn0036285	FBgn0259140	FBgn0051217	FBgn0023535
FBgn0001185	FBgn0035317	FBgn0025827	FBgn0028662	FBgn0032682	FBgn0026409	FBgn0050446	FBgn0035410	FBgn0032465	FBgn0086758	FBgn0011293	FBgn0085437
FBgn0031770	FBgn0029974	FBgn0010620	FBgn0032801	FBgn0031384	FBgn0030038	FBgn0030261	FBgn0035112	FBgn0000233	FBgn0037924	FBgn0037744	FBgn0040096
FBgn0022355	FBgn0035676	FBgn0052984	FBgn0039625	FBgn0038733	FBgn0037709	FBgn0030052	FBgn0040733	FBgn0038799	FBgn0032801	FBgn0050021	FBgn0034440
FBgn0001301	FBgn0015570	FBgn0035769	FBgn0031514	FBgn0030615	FBgn0085437	FBgn0052677	FBgn0031940	FBgn0037956	FBgn0000053	FBgn0034966	FBgn0039770
FBgn0002643	FBgn0087012	FBgn0034399	FBgn0034436	FBgn0083940	FBgn0023213	FBgn0032615	FBgn0032285	FBgn0036274	FBgn0000179	FBgn0032151	FBgn0259734
FBgn0028494	FBgn0033031	FBgn0039114	FBgn0051719	FBgn0033402	FBgn0040096	FBgn0033250	FBgn0029838	FBgn0026634	FBgn0034500	FBgn0051036	FBgn0030057
FBgn0051708	FBgn0034136	FBgn0039411	FBgn0034500	FBgn0035482	FBgn0031010	FBgn0030701	FBgn0029975	FBgn0010223	FBgn0037396	FBgn0259163	FBgn0033159
FBgn0003091	FBgn0037230	FBgn0053056	FBgn0042102	FBgn0015032	FBgn0033717	FBgn0085407	FBgn0033304	FBgn0023129	FBgn0063497	FBgn0036417	FBgn0052813
FBgn0015772	FBgn0259111	FBgn0004797	FBgn0053099	FBgn0031012	FBgn0038412	FBgn0051224	FBgn0085427	FBgn0028644	FBgn0002645	FBgn0020236	FBgn0031636
FBgn0026432	FBgn0040531	FBgn0014009	FBgn0039486	FBgn0038460	FBgn0259229	FBgn0001122	FBgn0036211	FBgn0086346	FBgn0037146	FBgn0026206	FBgn0031256
FBgn0010825	FBgn0027563	FBgn0003090	FBgn0003129	FBgn0011576	FBgn0035206	FBgn0038542	FBgn0039719	FBgn0028369	FBgn0026199	FBgn0259242	FBgn0028939
FBgn0035695	FBgn0052278	FBgn0260400	FBgn0054045	FBgn0061515	FBgn0052813	FBgn0086674	FBgn0039043	FBgn0020493	FBgn0026319	FBgn0020299	FBgn0040777
FBgn0010453	FBgn0032402	FBgn0010651	FBgn0036742	FBgn0052177	FBgn0030418	FBgn0001142	FBgn0024293	FBgn0033906	FBgn0011655	FBgn0015399	FBgn0034368
FBgn0032821	FBgn0020416	FBgn0030761	FBgn0063497	FBgn0037057	FBgn0033138	FBgn0260964	FBgn0036157	FBgn0013469	FBgn0035802	FBgn0053196	FBgn0003366
FBgn0035625	FBgn0039748	FBgn0035896	FBgn0037146	FBgn0035309	FBgn0041184	FBgn0010772	FBgn0032973	FBgn0038653	FBgn0015575	FBgn0052017	FBgn0037765
FBgn0034158	FBgn0036665	FBgn0032682	FBgn0052407	FBgn0038207	FBgn0004167	FBgn0031319	FBgn0038980	FBgn0038662	FBgn0066101	FBgn0003218	FBgn0031307
FBgn0034013	FBgn0037213	FBgn0002930	FBgn0026319	FBgn0032170	FBgn0016920	FBgn0029723	FBgn0036834	FBgn0034408	FBgn0259735	FBgn0038629	FBgn0051922
FBgn0037846	FBgn0002576	FBgn0031384	FBgn0054010	FBgn0033448	FBgn0034063	FBgn0033627	FBgn0035649	FBgn0003885	FBgn0023550	FBgn0033065	FBgn0034139
FBgn0028552	FBgn0039678	FBgn0259229	FBgn0039086	FBgn0032213	FBgn0039690	FBgn0051072	FBgn0034660	FBgn0034194	FBgn0033356	FBgn0036620	FBgn0032896
FBgn0031424	FBgn0033936	FBgn0052296	FBgn0011655	FBgn0035583	FBgn0040629	FBgn0030318	FBgn0001258	FBgn0024189	FBgn0032908	FBgn0032208	FBgn0000014
FBgn0086778	FBgn0035290	FBgn0035482	FBgn0035802	FBgn0034928	FBgn0052023	FBgn0053639	FBgn0259222	FBgn0040239	FBgn0013983	FBgn0031515	FBgn0033178
FBgn0029663	FBgn0005677	FBgn0015032	FBgn0033579	FBgn0036398	FBgn0032727	FBgn0260660	FBgn0000667	FBgn0051997	FBgn0030608	FBgn0039932	FBgn0029821
FBgn0030600	FBgn0003339	FBgn0038460	FBgn0260000	FBgn0041604	FBgn0085417	FBgn0026616	FBgn0028325	FBgn0013263	FBgn0041710	FBgn0030574	FBgn0051145
FBgn0032858	FBgn0034731	FBgn0040089	FBgn0015575	FBgn0259140	FBgn0014031	FBgn0052423	FBgn0050431	FBgn0004648	FBgn0016126	FBgn0038820	FBgn0085417
FBgn0037107	FBgn0000039	FBgn0260635	FBgn0053517	FBgn0086758	FBgn0004407	FBgn0039561	FBgn0028543	FBgn0034627	FBgn0032813	FBgn0032230	FBgn0014031
FBgn0037134	FBgn0036937	FBgn0011576	FBgn0066101	FBgn0033212	FBgn0032704	FBgn0031081	FBgn0085425	FBgn0053526	FBgn0031538	FBgn0052815	FBgn0039297
FBgn0034083	FBgn0038725	FBgn0259935	FBgn0036760	FBgn0010435	FBgn0035260	FBgn0083963	FBgn0038179	FBgn0085442	FBgn0020385	FBgn0036433	FBgn0046875
FBgn0039430	FBgn0038465	FBgn0037057	FBgn0032908	FBgn0037924	FBgn0039297	FBgn0015609	FBgn0036479	FBgn0052152	FBgn0051157	FBgn0030740	FBgn0033431
FBgn0001138	FBgn0038309	FBgn0035309	FBgn0037781	FBgn0043070	FBgn0034715	FBgn0001994	FBgn0013307	FBgn0031855	FBgn0003116	FBgn0031649	FBgn0037684
FBgn0000055	FBgn0038799	FBgn0010313	FBgn0029795	FBgn0037835	FBgn0259714	FBgn0031285	FBgn0037819	FBgn0027496	FBgn0033308	FBgn0025624	FBgn0011205
FBgn0033924	FBgn0037956	FBgn0038207	FBgn0053514	FBgn0010894	FBgn0033431	FBgn0003520	FBgn0034887	FBgn0016926	FBgn0023507	FBgn0004387	FBgn0039204
FBgn0259099	FBgn0036274	FBgn0032213	FBgn0032404	FBgn0037240	FBgn0053510	FBgn0004395	FBgn0036365	FBgn0031738	FBgn0052758	FBgn0043070	FBgn0037715
FBgn0015591	FBgn0030723	FBgn0033246	FBgn0051086	FBgn0028662	FBgn0038312	FBgn0010905	FBgn0032010	FBgn0036921	FBgn0034618	FBgn0021847	FBgn0050289
FBgn0259166	FBgn0039681	FBgn0036398	FBgn0019643	FBgn0032801	FBgn0039109	FBgn0051158	FBgn0021872	FBgn0260655	FBgn0030329	FBgn0086708	FBgn0038795
FBgn0037614	FBgn0029950	FBgn0038984	FBgn0032066	FBgn0031514	FBgn0034248	FBgn0036043	FBgn0039290	FBgn0036179	FBgn0037709	FBgn0016701	FBgn0051119
FBgn0050446	FBgn0027608	FBgn0041604	FBgn0086604	FBgn0034436	FBgn0037715	FBgn0039915	FBgn0033134	FBgn0259175	FBgn0023535	FBgn0050197	FBgn0032713
FBgn0030261	FBgn0027621	FBgn0086758	FBgn0037340	FBgn0051719	FBgn0050289	FBgn0039329	FBgn0038294	FBgn0010470	FBgn0043043	FBgn0038042	FBgn0035720
FBgn0085407	FBgn0036750	FBgn0010435	FBgn0036881	FBgn0034500	FBgn0015037	FBgn0033875	FBgn0026415	FBgn0035755	FBgn0085437	FBgn0023489	FBgn0035906
FBgn0052677	FBgn0023129	FBgn0037924	FBgn0000256	FBgn0042102	FBgn0035720	FBgn0039738	FBgn0032889	FBgn0051469	FBgn0039303	FBgn0000567	FBgn0034755
FBgn0000546	FBgn0028644	FBgn0043070	FBgn0028533	FBgn0039486	FBgn0039315	FBgn0052791	FBgn0050203	FBgn0039727	FBgn0033755	FBgn0051140	FBgn0032162
FBgn0033250	FBgn0040211	FBgn0037835	FBgn0002121	FBgn0003129	FBgn0032162	FBgn0037442	FBgn0003390	FBgn0034639	FBgn0023213	FBgn0038659	FBgn0027538
FBgn0030701	FBgn0040074	FBgn0002592	FBgn0030309	FBgn0036742	FBgn0027547	FBgn0019650	FBgn0051100	FBgn0260874	FBgn0040096	FBgn0001087	FBgn0050280
FBgn0051224	FBgn0012051	FBgn0010894	FBgn0031813	FBgn0063497	FBgn0086656	FBgn0029573	FBgn0037488	FBgn0001170	FBgn0002441	FBgn0038837	FBgn0032006
FBgn0005198	FBgn0005613	FBgn0037240	FBgn0038845	FBgn0020255	FBgn0030276	FBgn0011584	FBgn0034325	FBgn0030305	FBgn0030057	FBgn0024963	FBgn0031637
FBgn0001122	FBgn0033809	FBgn0034436	FBgn0023507	FBgn0052407	FBgn0032006	FBgn0025631	FBgn0038257	FBgn0027779	FBgn0036844	FBgn0030559	FBgn0035282
FBgn0038542	FBgn0043791	FBgn0051719	FBgn0010425	FBgn0026199	FBgn0017448	FBgn0259228	FBgn0040321	FBgn0037744	FBgn0030418	FBgn0032774	FBgn0046878
FBgn0086674	FBgn0035806	FBgn0034500	FBgn0030329	FBgn0039086	FBgn0037020	FBgn0037849	FBgn0038463	FBgn0003326	FBgn0037140	FBgn0027074	FBgn0039075
FBgn0010772	FBgn0027589	FBgn0003129	FBgn0040096	FBgn0027562	FBgn0031637	FBgn0016081	FBgn0039316	FBgn0034966	FBgn0000594	FBgn0003984	FBgn0038930
FBgn0052532	FBgn0004619	FBgn0036742	FBgn0050360	FBgn0011655	FBgn0035360	FBgn0039622	FBgn0025697	FBgn0035266	FBgn0034368	FBgn0085256	FBgn0085431
FBgn0031319	FBgn0030258	FBgn0036821	FBgn0033717	FBgn0004369	FBgn0034501	FBgn0027101	FBgn0043792	FBgn0051036	FBgn0004167	FBgn0033088	FBgn0031141
FBgn0033240	FBgn0052944	FBgn0063497	FBgn0038412	FBgn0035802	FBgn0039205	FBgn0259212	FBgn0010786	FBgn0052088	FBgn0003366	FBgn0038074	FBgn0030311
FBgn0029723	FBgn0036550	FBgn0002645	FBgn0031580	FBgn0033579	FBgn0027106	FBgn0013467	FBgn0002917	FBgn0259163	FBgn0016920	FBgn0041180	FBgn0025592
FBgn0033627	FBgn0031689	FBgn0020255	FBgn0034440	FBgn0260000	FBgn0039075	FBgn0034788	FBgn0028396	FBgn0028658	FBgn0053517	FBgn0032221	FBgn0001208
FBgn0051072	FBgn0259918	FBgn0052407	FBgn0259734	FBgn0259735	FBgn0085431	FBgn0029974	FBgn0033212	FBgn0020236	FBgn0037765	FBgn0259211	FBgn0015663
FBgn0030318	FBgn0024189	FBgn0026199	FBgn0052813	FBgn0024555	FBgn0031099	FBgn0035207	FBgn0020224	FBgn0034275	FBgn0034063	FBgn0050419	FBgn0037378
FBgn0053639	FBgn0005614	FBgn0051321	FBgn0031636	FBgn0053514	FBgn0037786	FBgn0035676	FBgn0003721	FBgn0033205	FBgn0034139	FBgn0015829	FBgn0030812
FBgn0260660	FBgn0037976	FBgn0027562	FBgn0029002	FBgn0042135	FBgn0031141	FBgn0033031	FBgn0036101	FBgn0035696	FBgn0032896	FBgn0027453	FBgn0005564
FBgn0026616	FBgn0024740	FBgn0011655	FBgn0051148	FBgn0086604	FBgn0037279	FBgn0034136	FBgn0034756	FBgn0038261	FBgn0030451	FBgn0034950	FBgn0032899
FBgn0052423	FBgn0037336	FBgn0035802	FBgn0035620	FBgn0037340	FBgn0033665	FBgn0259111	FBgn0040377	FBgn0259242	FBgn0033178	FBgn0034162	FBgn0035147
FBgn0039561	FBgn0020372	FBgn0036287	FBgn0037140	FBgn0039249	FBgn0033677	FBgn0052278	FBgn0036680	FBgn0020299	FBgn0029821	FBgn0036516	FBgn0259234
FBgn0031081	FBgn0011280	FBgn0033579	FBgn0033138	FBgn0052649	FBgn0051674	FBgn0032402	FBgn0000395	FBgn0053196	FBgn0051145	FBgn0038236	FBgn0035090
FBgn0050015	FBgn0051997	FBgn0015575	FBgn0041184	FBgn0002121	FBgn0035147	FBgn0031474	FBgn0026872	FBgn0036004	FBgn0085417	FBgn0034485	FBgn0033188
FBgn0015609	FBgn0042185	FBgn0027601	FBgn0004167	FBgn0002306	FBgn0051373	FBgn0035677	FBgn0014343	FBgn0003218	FBgn0037601	FBgn0052333	FBgn0039213
FBgn0001994	FBgn0036851	FBgn0036121	FBgn0016920	FBgn0030309	FBgn0039312	FBgn0025391	FBgn0085440	FBgn0053302	FBgn0014031	FBgn0053181	FBgn0039755
FBgn0031285	FBgn0036896	FBgn0003209	FBgn0033544	FBgn0029804	FBgn0259234	FBgn0031377	FBgn0260971	FBgn0039165	FBgn0035260	FBgn0039593	FBgn0004888
FBgn0003520	FBgn0032796	FBgn0259735	FBgn0028550	FBgn0004360	FBgn0039081	FBgn0001965	FBgn0030304	FBgn0035444	FBgn0036225	FBgn0052667	FBgn0035244
FBgn0004395	FBgn0051814	FBgn0085376	FBgn0040308	FBgn0029114	FBgn0001229	FBgn0005677	FBgn0037853	FBgn0015239	FBgn0013811	FBgn0034902	FBgn0085440
FBgn0010905	FBgn0051665	FBgn0036760	FBgn0032727	FBgn0023507	FBgn0033188	FBgn0034731	FBgn0031466	FBgn0037672	FBgn0039297	FBgn0039089	FBgn0001319
FBgn0035526	FBgn0031855	FBgn0024555	FBgn0041156	FBgn0085474	FBgn0036740	FBgn0000039	FBgn0013949	FBgn0039078	FBgn0014002	FBgn0053531	FBgn0038194
FBgn0036043	FBgn0037448	FBgn0025381	FBgn0085417	FBgn0032587	FBgn0086367	FBgn0031753	FBgn0035022	FBgn0032700	FBgn0052512	FBgn0014184	FBgn0004862
FBgn0039915	FBgn0035756	FBgn0042135	FBgn0036999	FBgn0034706	FBgn0035244	FBgn0038424	FBgn0036391	FBgn0260006	FBgn0033431	FBgn0035575	FBgn0037228
FBgn0039329	FBgn0032297	FBgn0016126	FBgn0032704	FBgn0259878	FBgn0003074	FBgn0038725	FBgn0033710	FBgn0030574	FBgn0037684	FBgn0031228	FBgn0031057
FBgn0033367	FBgn0037167	FBgn0039249	FBgn0036225	FBgn0085437	FBgn0040726	FBgn0260938	FBgn0027610	FBgn0034538	FBgn0032790	FBgn0052638	FBgn0030575
FBgn0033875	FBgn0003248	FBgn0052649	FBgn0039297	FBgn0040096	FBgn0085440	FBgn0000233	FBgn0053120	FBgn0000119	FBgn0011205	FBgn0260486	FBgn0039024
FBgn0033696	FBgn0029866	FBgn0002306	FBgn0053510	FBgn0029170	FBgn0001319	FBgn0262593	FBgn0038577	FBgn0033257	FBgn0037715	FBgn0026268	FBgn0052448
FBgn0039738	FBgn0051191	FBgn0030309	FBgn0003475	FBgn0033717	FBgn0038194	FBgn0038799	FBgn0015576	FBgn0052815	FBgn0050289	FBgn0032879	FBgn0038065
FBgn0052791	FBgn0036179	FBgn0029804	FBgn0028948	FBgn0038412	FBgn0031057	FBgn0036274	FBgn0050148	FBgn0036433	FBgn0038795	FBgn0039102	FBgn0032836
FBgn0037442	FBgn0004587	FBgn0085474	FBgn0031032	FBgn0259174	FBgn0030575	FBgn0030723	FBgn0030041	FBgn0021967	FBgn0005612	FBgn0038143	FBgn0033226
FBgn0031284	FBgn0036659	FBgn0032587	FBgn0029827	FBgn0033159	FBgn0038916	FBgn0036777	FBgn0014000	FBgn0031159	FBgn0032713	FBgn0005619	FBgn0030731
FBgn0025631	FBgn0035755	FBgn0034706	FBgn0015037	FBgn0052813	FBgn0035131	FBgn0026634	FBgn0035985	FBgn0004456	FBgn0015037	FBgn0039595	FBgn0034920
FBgn0259228	FBgn0086675	FBgn0259878	FBgn0042110	FBgn0031636	FBgn0039751	FBgn0039681	FBgn0037895	FBgn0032017	FBgn0035720	FBgn0014010	FBgn0029092
FBgn0037849	FBgn0000439	FBgn0260049	FBgn0039315	FBgn0032752	FBgn0031703	FBgn0029950	FBgn0030718	FBgn0025624	FBgn0032162	FBgn0030648	FBgn0031695
FBgn0016081	FBgn0028369	FBgn0033755	FBgn0034755	FBgn0036844	FBgn0039840	FBgn0027608	FBgn0052626	FBgn0004387	FBgn0050280	FBgn0036900	FBgn0086913
FBgn0039622	FBgn0051217	FBgn0033717	FBgn0053523	FBgn0030418	FBgn0033226	FBgn0034389	FBgn0052499	FBgn0027503	FBgn0004168	FBgn0032810	FBgn0040658
FBgn0027101	FBgn0023178	FBgn0259174	FBgn0027538	FBgn0037140	FBgn0030731	FBgn0011286	FBgn0031089	FBgn0037241	FBgn0029814	FBgn0032140	FBgn0034330
FBgn0259212	FBgn0011293	FBgn0035346	FBgn0030695	FBgn0004167	FBgn0029969	FBgn0036463	FBgn0005561	FBgn0016701	FBgn0038083	FBgn0052521	FBgn0037763
FBgn0013467	FBgn0050021	FBgn0033159	FBgn0027547	FBgn0016920	FBgn0028527	FBgn0028644	FBgn0035849	FBgn0050197	FBgn0034501	FBgn0035880	FBgn0030348
FBgn0034788	FBgn0034966	FBgn0052813	FBgn0032006	FBgn0042630	FBgn0037911	FBgn0040318	FBgn0250819	FBgn0031312	FBgn0035282	FBgn0037636	FBgn0051201
FBgn0029974	FBgn0003731	FBgn0036844	FBgn0037020	FBgn0031307	FBgn0083967	FBgn0037705	FBgn0030157	FBgn0032001	FBgn0046878	FBgn0069969	FBgn0030796
FBgn0035207	FBgn0032151	FBgn0030418	FBgn0035360	FBgn0260960	FBgn0033413	FBgn0033809	FBgn0031973	FBgn0027074	FBgn0038930	FBgn0004244	FBgn0045842
FBgn0035676	FBgn0051036	FBgn0034368	FBgn0038083	FBgn0051176	FBgn0030687	FBgn0020493	FBgn0033880	FBgn0020389	FBgn0031141	FBgn0038946	FBgn0039328
FBgn0087012	FBgn0259163	FBgn0004167	FBgn0027106	FBgn0028550	FBgn0086913	FBgn0027589	FBgn0028490	FBgn0037743	FBgn0039596	FBgn0037754	FBgn0028692
FBgn0033031	FBgn0037290	FBgn0003366	FBgn0033760	FBgn0032025	FBgn0040658	FBgn0038653	FBgn0035813	FBgn0026374	FBgn0031002	FBgn0036446	FBgn0003308
FBgn0034136	FBgn0028658	FBgn0016920	FBgn0035926	FBgn0040382	FBgn0053547	FBgn0004619	FBgn0039151	FBgn0243516	FBgn0025592	FBgn0261397	FBgn0031327
FBgn0259111	FBgn0051445	FBgn0042630	FBgn0031141	FBgn0051145	FBgn0024980	FBgn0036255	FBgn0040285	FBgn0050419	FBgn0259174	FBgn0052225	FBgn0039026
FBgn0052278	FBgn0036417	FBgn0031307	FBgn0010504	FBgn0037601	FBgn0085313	FBgn0030258	FBgn0040064	FBgn0000229	FBgn0034229	FBgn0024277	FBgn0027594
FBgn0032402	FBgn0037534	FBgn0260960	FBgn0039596	FBgn0039161	FBgn0036191	FBgn0052221	FBgn0035517	FBgn0034996	FBgn0001208	FBgn0028500	FBgn0033724
FBgn0014859	FBgn0028955	FBgn0051176	FBgn0010246	FBgn0039297	FBgn0031589	FBgn0033356	FBgn0001257	FBgn0259749	FBgn0037378	FBgn0032285	FBgn0037552
FBgn0031474	FBgn0000180	FBgn0028550	FBgn0031002	FBgn0259714	FBgn0039328	FBgn0003885	FBgn0011758	FBgn0001189	FBgn0030812	FBgn0052369	FBgn0001123
FBgn0028916	FBgn0020299	FBgn0032025	FBgn0025592	FBgn0003475	FBgn0053012	FBgn0052944	FBgn0259246	FBgn0001253	FBgn0034013	FBgn0030792	FBgn0050296
FBgn0035677	FBgn0015269	FBgn0040382	FBgn0259174	FBgn0011205	FBgn0003308	FBgn0035235	FBgn0040513	FBgn0032147	FBgn0035147	FBgn0028523	FBgn0028664
FBgn0025391	FBgn0052017	FBgn0051145	FBgn0037279	FBgn0031918	FBgn0001215	FBgn0036550	FBgn0011656	FBgn0050392	FBgn0051373	FBgn0031275	FBgn0038172
FBgn0031377	FBgn0003218	FBgn0041156	FBgn0033665	FBgn0051119	FBgn0005660	FBgn0031689	FBgn0044047	FBgn0034542	FBgn0023520	FBgn0034744	FBgn0031646
FBgn0001965	FBgn0034509	FBgn0030510	FBgn0052204	FBgn0015037	FBgn0029854	FBgn0033750	FBgn0031632	FBgn0039507	FBgn0035090	FBgn0085427	FBgn0037635
FBgn0005677	FBgn0033065	FBgn0085409	FBgn0039087	FBgn0042110	FBgn0031732	FBgn0024189	FBgn0034117	FBgn0035947	FBgn0039213	FBgn0036211	FBgn0029830
FBgn0003339	FBgn0036620	FBgn0085417	FBgn0015663	FBgn0035720	FBgn0035409	FBgn0037976	FBgn0033742	FBgn0029849	FBgn0039755	FBgn0017590	FBgn0000723
FBgn0034731	FBgn0083975	FBgn0039161	FBgn0038701	FBgn0035906	FBgn0040252	FBgn0035157	FBgn0030926	FBgn0027341	FBgn0004888	FBgn0037896	FBgn0086370
FBgn0000039	FBgn0031515	FBgn0035260	FBgn0037293	FBgn0028622	FBgn0036298	FBgn0037336	FBgn0030941	FBgn0038202	FBgn0035244	FBgn0039043	FBgn0038877
FBgn0031753	FBgn0039932	FBgn0039297	FBgn0051674	FBgn0034755	FBgn0038354	FBgn0020372	FBgn0038076	FBgn0034902	FBgn0085440	FBgn0011739	FBgn0052191
FBgn0038424	FBgn0030574	FBgn0046875	FBgn0039323	FBgn0053523	FBgn0001123	FBgn0042185	FBgn0027544	FBgn0086909	FBgn0001319	FBgn0024293	FBgn0016075
FBgn0038725	FBgn0038820	FBgn0259714	FBgn0035147	FBgn0027547	FBgn0030679	FBgn0032845	FBgn0039938	FBgn0022359	FBgn0038194	FBgn0036157	FBgn0042627
FBgn0260938	FBgn0261261	FBgn0014002	FBgn0036024	FBgn0039094	FBgn0035283	FBgn0036896	FBgn0035623	FBgn0014184	FBgn0031057	FBgn0036341	FBgn0027580
FBgn0038465	FBgn0032230	FBgn0010263	FBgn0259234	FBgn0032006	FBgn0028664	FBgn0011737	FBgn0035544	FBgn0010078	FBgn0030575	FBgn0261258	FBgn0037239
FBgn0262593	FBgn0038173	FBgn0011205	FBgn0260944	FBgn0037020	FBgn0259140	FBgn0053526	FBgn0000046	FBgn0011016	FBgn0039024	FBgn0033474	FBgn0036627
FBgn0038799	FBgn0085417	FBgn0038422	FBgn0030077	FBgn0031637	FBgn0005632	FBgn0032796	FBgn0030239	FBgn0031228	FBgn0029176	FBgn0036318	FBgn0031449
FBgn0037956	FBgn0036433	FBgn0035720	FBgn0033188	FBgn0038083	FBgn0035968	FBgn0051814	FBgn0053156	FBgn0052638	FBgn0015781	FBgn0034660	FBgn0035142
FBgn0036274	FBgn0031159	FBgn0086898	FBgn0260482	FBgn0034264	FBgn0038639	FBgn0037391	FBgn0038959	FBgn0030799	FBgn0052448	FBgn0005536	FBgn0044812
FBgn0030723	FBgn0038350	FBgn0028622	FBgn0052633	FBgn0052250	FBgn0000723	FBgn0051665	FBgn0038250	FBgn0260486	FBgn0026874	FBgn0038675	FBgn0036547
FBgn0039681	FBgn0036106	FBgn0038917	FBgn0001319	FBgn0031879	FBgn0002921	FBgn0031855	FBgn0031055	FBgn0003008	FBgn0032836	FBgn0260941	FBgn0051974
FBgn0029950	FBgn0036264	FBgn0034755	FBgn0038194	FBgn0039075	FBgn0032407	FBgn0051191	FBgn0039904	FBgn0032879	FBgn0034517	FBgn0031016	FBgn0085382
FBgn0027608	FBgn0031649	FBgn0039742	FBgn0039591	FBgn0037786	FBgn0034085	FBgn0036179	FBgn0040832	FBgn0025621	FBgn0030731	FBgn0028543	FBgn0015924
FBgn0034389	FBgn0025624	FBgn0027547	FBgn0038916	FBgn0031141	FBgn0031791	FBgn0086675	FBgn0025827	FBgn0039807	FBgn0029969	FBgn0041210	FBgn0039051
FBgn0011286	FBgn0052982	FBgn0086656	FBgn0015781	FBgn0039596	FBgn0040234	FBgn0031759	FBgn0023540	FBgn0038606	FBgn0029092	FBgn0035521	FBgn0016032
FBgn0035001	FBgn0053110	FBgn0032006	FBgn0034197	FBgn0039864	FBgn0034095	FBgn0260874	FBgn0015524	FBgn0026372	FBgn0040658	FBgn0034534	FBgn0085387
FBgn0036463	FBgn0043070	FBgn0030883	FBgn0039840	FBgn0010246	FBgn0032200	FBgn0028369	FBgn0035769	FBgn0047135	FBgn0034330	FBgn0087005	FBgn0027095
FBgn0028644	FBgn0052694	FBgn0037020	FBgn0086357	FBgn0025592	FBgn0033789	FBgn0023178	FBgn0038849	FBgn0030648	FBgn0037763	FBgn0003891	FBgn0027560
FBgn0085438	FBgn0053531	FBgn0031637	FBgn0033226	FBgn0033677	FBgn0016076	FBgn0051550	FBgn0043578	FBgn0032015	FBgn0030348	FBgn0032688	FBgn0036262
FBgn0259146	FBgn0050197	FBgn0046685	FBgn0030731	FBgn0003089	FBgn0019968	FBgn0050021	FBgn0039114	FBgn0034392	FBgn0024980	FBgn0050343	FBgn0030357
FBgn0037705	FBgn0038042	FBgn0026375	FBgn0260499	FBgn0035359	FBgn0034035	FBgn0034966	FBgn0024232	FBgn0011361	FBgn0045842	FBgn0051300	FBgn0040600
FBgn0033809	FBgn0032001	FBgn0034264	FBgn0083967	FBgn0031629	FBgn0051974	FBgn0032151	FBgn0036876	FBgn0038533	FBgn0031589	FBgn0050203	FBgn0027596
FBgn0000352	FBgn0032336	FBgn0052250	FBgn0031695	FBgn0032139	FBgn0039051	FBgn0259163	FBgn0039690	FBgn0052521	FBgn0039817	FBgn0020907	FBgn0010051
FBgn0027589	FBgn0023489	FBgn0031879	FBgn0010241	FBgn0039323	FBgn0029711	FBgn0038815	FBgn0032888	FBgn0003388	FBgn0036152	FBgn0000442	FBgn0052672
FBgn0038653	FBgn0051140	FBgn0039075	FBgn0053547	FBgn0005564	FBgn0027560	FBgn0028658	FBgn0033274	FBgn0261397	FBgn0027506	FBgn0051100	FBgn0030262
FBgn0004619	FBgn0038659	FBgn0085431	FBgn0030348	FBgn0032899	FBgn0039726	FBgn0085431	FBgn0051199	FBgn0031294	FBgn0003308	FBgn0013973	FBgn0000261
FBgn0036255	FBgn0038837	FBgn0031141	FBgn0024980	FBgn0003175	FBgn0050277	FBgn0030345	FBgn0053056	FBgn0031161	FBgn0021795	FBgn0004635	FBgn0052549
FBgn0030258	FBgn0031808	FBgn0025790	FBgn0037989	FBgn0259238	FBgn0040600	FBgn0052685	FBgn0004797	FBgn0028500	FBgn0005660	FBgn0040321	FBgn0034795
FBgn0033356	FBgn0030559	FBgn0039864	FBgn0039747	FBgn0039081	FBgn0032234	FBgn0020236	FBgn0038181	FBgn0036820	FBgn0037552	FBgn0051713	FBgn0259896
FBgn0003885	FBgn0032774	FBgn0025592	FBgn0003308	FBgn0023520	FBgn0000261	FBgn0026206	FBgn0031564	FBgn0033304	FBgn0037525	FBgn0031652	FBgn0038260
FBgn0052944	FBgn0027074	FBgn0052528	FBgn0038082	FBgn0034371	FBgn0039854	FBgn0014870	FBgn0014009	FBgn0085427	FBgn0259241	FBgn0028544	FBgn0050187
FBgn0035235	FBgn0003984	FBgn0033677	FBgn0032187	FBgn0260944	FBgn0003888	FBgn0028734	FBgn0003090	FBgn0039719	FBgn0035283	FBgn0004595	FBgn0039611
FBgn0036550	FBgn0085256	FBgn0260942	FBgn0005660	FBgn0030077	FBgn0038260	FBgn0000180	FBgn0010651	FBgn0039580	FBgn0010379	FBgn0025697	FBgn0015034
FBgn0031689	FBgn0037743	FBgn0003089	FBgn0030808	FBgn0033188	FBgn0024329	FBgn0259242	FBgn0035076	FBgn0035227	FBgn0038172	FBgn0043792	FBgn0085370
FBgn0024189	FBgn0035171	FBgn0028953	FBgn0027594	FBgn0260482	FBgn0029762	FBgn0020299	FBgn0030761	FBgn0031681	FBgn0005632	FBgn0002917	FBgn0034724
FBgn0037976	FBgn0011722	FBgn0031629	FBgn0031732	FBgn0052633	FBgn0031530	FBgn0025558	FBgn0038570	FBgn0039043	FBgn0260941	FBgn0028396	FBgn0015794
FBgn0035157	FBgn0038074	FBgn0032139	FBgn0040252	FBgn0038017	FBgn0015034	FBgn0015399	FBgn0032682	FBgn0032973	FBgn0031646	FBgn0020224	FBgn0029769
FBgn0037336	FBgn0041180	FBgn0030812	FBgn0259241	FBgn0038194	FBgn0003218	FBgn0052017	FBgn0002930	FBgn0038980	FBgn0037635	FBgn0029937	FBgn0029648
FBgn0020372	FBgn0032221	FBgn0039323	FBgn0036766	FBgn0004862	FBgn0037144	FBgn0003218	FBgn0038142	FBgn0003651	FBgn0032407	FBgn0016797	FBgn0027583
FBgn0027598	FBgn0031220	FBgn0005564	FBgn0036298	FBgn0035131	FBgn0038331	FBgn0038629	FBgn0031384	FBgn0036834	FBgn0037503	FBgn0035469	FBgn0054054
FBgn0042185	FBgn0027453	FBgn0033917	FBgn0010473	FBgn0015781	FBgn0035850	FBgn0036544	FBgn0035379	FBgn0261258	FBgn0052191	FBgn0039298	FBgn0027590
FBgn0036851	FBgn0026593	FBgn0032899	FBgn0037084	FBgn0034920	FBgn0053993	FBgn0032208	FBgn0038733	FBgn0036318	FBgn0016075	FBgn0030412	FBgn0040236
FBgn0036896	FBgn0034950	FBgn0037350	FBgn0000723	FBgn0260499	FBgn0028516	FBgn0037672	FBgn0051145	FBgn0259222	FBgn0042627	FBgn0053203	FBgn0036302
FBgn0011737	FBgn0034162	FBgn0259234	FBgn0034085	FBgn0083967	FBgn0034312	FBgn0026761	FBgn0259229	FBgn0020391	FBgn0040234	FBgn0032881	FBgn0034276
FBgn0053526	FBgn0031693	FBgn0039081	FBgn0034476	FBgn0031695	FBgn0039038	FBgn0035488	FBgn0051778	FBgn0041210	FBgn0027580	FBgn0026872	FBgn0052068
FBgn0004839	FBgn0038236	FBgn0034371	FBgn0031791	FBgn0040658	FBgn0034997	FBgn0039078	FBgn0031389	FBgn0010265	FBgn0037239	FBgn0034897	FBgn0039970
FBgn0032796	FBgn0041337	FBgn0030077	FBgn0033926	FBgn0010241	FBgn0052485	FBgn0032129	FBgn0016797	FBgn0033405	FBgn0031449	FBgn0029935	FBgn0024289
FBgn0051814	FBgn0034485	FBgn0033188	FBgn0021776	FBgn0051201	FBgn0036756	FBgn0039932	FBgn0030029	FBgn0034534	FBgn0035142	FBgn0025726	FBgn0029608
FBgn0037391	FBgn0052333	FBgn0032381	FBgn0031654	FBgn0030796	FBgn0029648	FBgn0039882	FBgn0083940	FBgn0037819	FBgn0044812	FBgn0027341	FBgn0033633
FBgn0051665	FBgn0039593	FBgn0039213	FBgn0033296	FBgn0024980	FBgn0020257	FBgn0030574	FBgn0035482	FBgn0041160	FBgn0031815	FBgn0010039	FBgn0028399
FBgn0031855	FBgn0032100	FBgn0260482	FBgn0033789	FBgn0259209	FBgn0037850	FBgn0038173	FBgn0040089	FBgn0034654	FBgn0036547	FBgn0033958	FBgn0033756
FBgn0003248	FBgn0036501	FBgn0036059	FBgn0038702	FBgn0039328	FBgn0030745	FBgn0024811	FBgn0260635	FBgn0032688	FBgn0051974	FBgn0260855	FBgn0033744
FBgn0031738	FBgn0031765	FBgn0040726	FBgn0036627	FBgn0000092	FBgn0027583	FBgn0038828	FBgn0011576	FBgn0261349	FBgn0085382	FBgn0260971	FBgn0033972
FBgn0051191	FBgn0052667	FBgn0038017	FBgn0033826	FBgn0033942	FBgn0024963	FBgn0052815	FBgn0040398	FBgn0021872	FBgn0029711	FBgn0045063	FBgn0037974
FBgn0036179	FBgn0033564	FBgn0001319	FBgn0032087	FBgn0039747	FBgn0027590	FBgn0031159	FBgn0038271	FBgn0050343	FBgn0027560	FBgn0030304	FBgn0030105
FBgn0086675	FBgn0031970	FBgn0038194	FBgn0019968	FBgn0053012	FBgn0050421	FBgn0031571	FBgn0032181	FBgn0033134	FBgn0036262	FBgn0029137	FBgn0000319
FBgn0031759	FBgn0027341	FBgn0004862	FBgn0035142	FBgn0039026	FBgn0040236	FBgn0031649	FBgn0037057	FBgn0037098	FBgn0040600	FBgn0052039	FBgn0034382
FBgn0039319	FBgn0038202	FBgn0051103	FBgn0011554	FBgn0038082	FBgn0030271	FBgn0052982	FBgn0033603	FBgn0010408	FBgn0027596	FBgn0037163	FBgn0016122
FBgn0000439	FBgn0039089	FBgn0035131	FBgn0031248	FBgn0014906	FBgn0036302	FBgn0043070	FBgn0001086	FBgn0035476	FBgn0010051	FBgn0025790	FBgn0000416
FBgn0260874	FBgn0086909	FBgn0015781	FBgn0035449	FBgn0027594	FBgn0052068	FBgn0021847	FBgn0038450	FBgn0035815	FBgn0003162	FBgn0037853	FBgn0001991
FBgn0028369	FBgn0034394	FBgn0031703	FBgn0034035	FBgn0033724	FBgn0026369	FBgn0086708	FBgn0032213	FBgn0051100	FBgn0030262	FBgn0259244	FBgn0031489
FBgn0034570	FBgn0038407	FBgn0032836	FBgn0051974	FBgn0031732	FBgn0031117	FBgn0053531	FBgn0052982	FBgn0001218	FBgn0000261	FBgn0031627	FBgn0004629
FBgn0023178	FBgn0035575	FBgn0030731	FBgn0001285	FBgn0040252	FBgn0024289	FBgn0050197	FBgn0027339	FBgn0050460	FBgn0052549	FBgn0013949	FBgn0030350
FBgn0051550	FBgn0002940	FBgn0034920	FBgn0034612	FBgn0038354	FBgn0036551	FBgn0034460	FBgn0033246	FBgn0051235	FBgn0034795	FBgn0035477	FBgn0034512
FBgn0050021	FBgn0050151	FBgn0260499	FBgn0039051	FBgn0001123	FBgn0051272	FBgn0038042	FBgn0031428	FBgn0031652	FBgn0015038	FBgn0036882	FBgn0038420
FBgn0003326	FBgn0026268	FBgn0033413	FBgn0029711	FBgn0050296	FBgn0034628	FBgn0032336	FBgn0034928	FBgn0031633	FBgn0032172	FBgn0027548	FBgn0030263
FBgn0032151	FBgn0032879	FBgn0031695	FBgn0002578	FBgn0034049	FBgn0038037	FBgn0051140	FBgn0038299	FBgn0038463	FBgn0039611	FBgn0033710	FBgn0020415
FBgn0259163	FBgn0033127	FBgn0086913	FBgn0051269	FBgn0010379	FBgn0028399	FBgn0038659	FBgn0038984	FBgn0040340	FBgn0015034	FBgn0027610	FBgn0260642
FBgn0038815	FBgn0085411	FBgn0000575	FBgn0039774	FBgn0020381	FBgn0259167	FBgn0001087	FBgn0259140	FBgn0028398	FBgn0034724	FBgn0000535	FBgn0050154
FBgn0028658	FBgn0039102	FBgn0040658	FBgn0002570	FBgn0037469	FBgn0033972	FBgn0085400	FBgn0086758	FBgn0031289	FBgn0034997	FBgn0035499	FBgn0035656
FBgn0052685	FBgn0038143	FBgn0053547	FBgn0033691	FBgn0000723	FBgn0037713	FBgn0024806	FBgn0010435	FBgn0039356	FBgn0029769	FBgn0036448	FBgn0032156
FBgn0026206	FBgn0005619	FBgn0051201	FBgn0027596	FBgn0034085	FBgn0000319	FBgn0038837	FBgn0037835	FBgn0011705	FBgn0029648	FBgn0015576	FBgn0031939
FBgn0014870	FBgn0086691	FBgn0030796	FBgn0034296	FBgn0031791	FBgn0039862	FBgn0031808	FBgn0002592	FBgn0034061	FBgn0030672	FBgn0050148	FBgn0085257
FBgn0028734	FBgn0025833	FBgn0045842	FBgn0052284	FBgn0038877	FBgn0032124	FBgn0030559	FBgn0030605	FBgn0051472	FBgn0054054	FBgn0036260	FBgn0026878
FBgn0011481	FBgn0032810	FBgn0036484	FBgn0032088	FBgn0039025	FBgn0027564	FBgn0003464	FBgn0000053	FBgn0033212	FBgn0024963	FBgn0085430	FBgn0032524
FBgn0000180	FBgn0012344	FBgn0031589	FBgn0015038	FBgn0040234	FBgn0025692	FBgn0037743	FBgn0000179	FBgn0032285	FBgn0027590	FBgn0040697	FBgn0000326
FBgn0259242	FBgn0038147	FBgn0039328	FBgn0029762	FBgn0034095	FBgn0000416	FBgn0035171	FBgn0034500	FBgn0037150	FBgn0034050	FBgn0260935	FBgn0024754
FBgn0020299	FBgn0032140	FBgn0000092	FBgn0031530	FBgn0016076	FBgn0031489	FBgn0033088	FBgn0039486	FBgn0035469	FBgn0036302	FBgn0000489	FBgn0259111
FBgn0025558	FBgn0052521	FBgn0031821	FBgn0259244	FBgn0001259	FBgn0026755	FBgn0026374	FBgn0037396	FBgn0034756	FBgn0034276	FBgn0031894	FBgn0025583
FBgn0015399	FBgn0035880	FBgn0033942	FBgn0033292	FBgn0036627	FBgn0034045	FBgn0032221	FBgn0037544	FBgn0036680	FBgn0085430	FBgn0030997	FBgn0051823
FBgn0036004	FBgn0069969	FBgn0003308	FBgn0034312	FBgn0019968	FBgn0008636	FBgn0004647	FBgn0003129	FBgn0030724	FBgn0001169	FBgn0019662	FBgn0085453
FBgn0052017	FBgn0004244	FBgn0001215	FBgn0015794	FBgn0035142	FBgn0030263	FBgn0050419	FBgn0039630	FBgn0037609	FBgn0052068	FBgn0030847	FBgn0030425
FBgn0003218	FBgn0038946	FBgn0005660	FBgn0052485	FBgn0011554	FBgn0260642	FBgn0036134	FBgn0036742	FBgn0023458	FBgn0024289	FBgn0014000	FBgn0024179
FBgn0037116	FBgn0040271	FBgn0014906	FBgn0035781	FBgn0000061	FBgn0028473	FBgn0011259	FBgn0034182	FBgn0000395	FBgn0037974	FBgn0052547	FBgn0033853
FBgn0023215	FBgn0015039	FBgn0034286	FBgn0036756	FBgn0036547	FBgn0036196	FBgn0034950	FBgn0036821	FBgn0026872	FBgn0034382	FBgn0034293	FBgn0011581
FBgn0259143	FBgn0037754	FBgn0000635	FBgn0039321	FBgn0034491	FBgn0036666	FBgn0031213	FBgn0037146	FBgn0031244	FBgn0030960	FBgn0033502	FBgn0027552
FBgn0032208	FBgn0031734	FBgn0259241	FBgn0020257	FBgn0015924	FBgn0000152	FBgn0034485	FBgn0026319	FBgn0085440	FBgn0016122	FBgn0052850	FBgn0033879
FBgn0037672	FBgn0036446	FBgn0010473	FBgn0259245	FBgn0029711	FBgn0259111	FBgn0052333	FBgn0051321	FBgn0029118	FBgn0000416	FBgn0250788	FBgn0051777
FBgn0035488	FBgn0052225	FBgn0001123	FBgn0037850	FBgn0016032	FBgn0037730	FBgn0032100	FBgn0027562	FBgn0040850	FBgn0036007	FBgn0037895	FBgn0038603
FBgn0039078	FBgn0031294	FBgn0050296	FBgn0024963	FBgn0030357	FBgn0028518	FBgn0036501	FBgn0011655	FBgn0003748	FBgn0031489	FBgn0038498	FBgn0032076
FBgn0032129	FBgn0024277	FBgn0010379	FBgn0085359	FBgn0035611	FBgn0015776	FBgn0031765	FBgn0035802	FBgn0260855	FBgn0004629	FBgn0030159	FBgn0035588
FBgn0039932	FBgn0035112	FBgn0020381	FBgn0085386	FBgn0040600	FBgn0031702	FBgn0038202	FBgn0036287	FBgn0032399	FBgn0030350	FBgn0039505	FBgn0035091
FBgn0039882	FBgn0040733	FBgn0259140	FBgn0038700	FBgn0035480	FBgn0051823	FBgn0020503	FBgn0036992	FBgn0015737	FBgn0034045	FBgn0010473	FBgn0259682
FBgn0030574	FBgn0261085	FBgn0035968	FBgn0027590	FBgn0052284	FBgn0024179	FBgn0052843	FBgn0035581	FBgn0052069	FBgn0026197	FBgn0010105	FBgn0028582
FBgn0038173	FBgn0028523	FBgn0000723	FBgn0030271	FBgn0010051	FBgn0053207	FBgn0039089	FBgn0033579	FBgn0052039	FBgn0034512	FBgn0005561	FBgn0030925
FBgn0024811	FBgn0033304	FBgn0031791	FBgn0039225	FBgn0039854	FBgn0027552	FBgn0038427	FBgn0015575	FBgn0037853	FBgn0030406	FBgn0000658	FBgn0023477
FBgn0038828	FBgn0031275	FBgn0038877	FBgn0036302	FBgn0015038	FBgn0027493	FBgn0086909	FBgn0037677	FBgn0033814	FBgn0020415	FBgn0029894	FBgn0046114
FBgn0085417	FBgn0036211	FBgn0003499	FBgn0052068	FBgn0029762	FBgn0035588	FBgn0022359	FBgn0029161	FBgn0031466	FBgn0050154	FBgn0030157	FBgn0031374
FBgn0052815	FBgn0017590	FBgn0040234	FBgn0001085	FBgn0023407	FBgn0024320	FBgn0038407	FBgn0259735	FBgn0052230	FBgn0035656	FBgn0030869	FBgn0030260
FBgn0031159	FBgn0037896	FBgn0034095	FBgn0029608	FBgn0085370	FBgn0016031	FBgn0035575	FBgn0023550	FBgn0035477	FBgn0031939	FBgn0001139	FBgn0052195
FBgn0026086	FBgn0259243	FBgn0027580	FBgn0011834	FBgn0038331	FBgn0028582	FBgn0038826	FBgn0003429	FBgn0036391	FBgn0028473	FBgn0028490	FBgn0021767
FBgn0031649	FBgn0039043	FBgn0016076	FBgn0033633	FBgn0032021	FBgn0031523	FBgn0260486	FBgn0032908	FBgn0004893	FBgn0085257	FBgn0000120	FBgn0023174
FBgn0032017	FBgn0024293	FBgn0001259	FBgn0036551	FBgn0034312	FBgn0050273	FBgn0030572	FBgn0005633	FBgn0027548	FBgn0026878	FBgn0011758	FBgn0035285
FBgn0025624	FBgn0036157	FBgn0030897	FBgn0050502	FBgn0039038	FBgn0004456	FBgn0033127	FBgn0019643	FBgn0027610	FBgn0029763	FBgn0035423	FBgn0024957
FBgn0004387	FBgn0032973	FBgn0035142	FBgn0034628	FBgn0052485	FBgn0023477	FBgn0038143	FBgn0041710	FBgn0032018	FBgn0032524	FBgn0034396	FBgn0028430
FBgn0052982	FBgn0036834	FBgn0036547	FBgn0038037	FBgn0036756	FBgn0046114	FBgn0005619	FBgn0261290	FBgn0039588	FBgn0000326	FBgn0259246	FBgn0000536
FBgn0043070	FBgn0035649	FBgn0034491	FBgn0037974	FBgn0039321	FBgn0037485	FBgn0037917	FBgn0016126	FBgn0005616	FBgn0259111	FBgn0022710	FBgn0259216
FBgn0021847	FBgn0033474	FBgn0015924	FBgn0039862	FBgn0027583	FBgn0085427	FBgn0024558	FBgn0036881	FBgn0040022	FBgn0035770	FBgn0038803	FBgn0259712
FBgn0086708	FBgn0085419	FBgn0029711	FBgn0032124	FBgn0032022	FBgn0052195	FBgn0051635	FBgn0052649	FBgn0025724	FBgn0019925	FBgn0004359	FBgn0036587
FBgn0038042	FBgn0034660	FBgn0016032	FBgn0027564	FBgn0024963	FBgn0015036	FBgn0014010	FBgn0002306	FBgn0037135	FBgn0038484	FBgn0052354	FBgn0031478
FBgn0032336	FBgn0020391	FBgn0085387	FBgn0259179	FBgn0085359	FBgn0039304	FBgn0038606	FBgn0031538	FBgn0261108	FBgn0025583	FBgn0041707	FBgn0025740
FBgn0000567	FBgn0050431	FBgn0039726	FBgn0025692	FBgn0038700	FBgn0038721	FBgn0025833	FBgn0030309	FBgn0032689	FBgn0031702	FBgn0031850	FBgn0028685
FBgn0051140	FBgn0039349	FBgn0034137	FBgn0037783	FBgn0035934	FBgn0000455	FBgn0259224	FBgn0020385	FBgn0260935	FBgn0005658	FBgn0030926	FBgn0038977
FBgn0038659	FBgn0028543	FBgn0030357	FBgn0036801	FBgn0027590	FBgn0013772	FBgn0012344	FBgn0039040	FBgn0085369	FBgn0085453	FBgn0031708	FBgn0000455
FBgn0001087	FBgn0041210	FBgn0040600	FBgn0031489	FBgn0031869	FBgn0032833	FBgn0038147	FBgn0051157	FBgn0037622	FBgn0030425	FBgn0035179	FBgn0034172
FBgn0085400	FBgn0038179	FBgn0035480	FBgn0026755	FBgn0038536	FBgn0036360	FBgn0037818	FBgn0033110	FBgn0039098	FBgn0034290	FBgn0004242	FBgn0036449
FBgn0024806	FBgn0035521	FBgn0027497	FBgn0034045	FBgn0036302	FBgn0020912	FBgn0052521	FBgn0003116	FBgn0040529	FBgn0051871	FBgn0027844	FBgn0035719
FBgn0038837	FBgn0038735	FBgn0013997	FBgn0030406	FBgn0038126	FBgn0037019	FBgn0037636	FBgn0033308	FBgn0011296	FBgn0024179	FBgn0004575	FBgn0027932
FBgn0031808	FBgn0013307	FBgn0010051	FBgn0008636	FBgn0026369	FBgn0001098	FBgn0069969	FBgn0023507	FBgn0029688	FBgn0033853	FBgn0038959	FBgn0062442
FBgn0030559	FBgn0037819	FBgn0003162	FBgn0051116	FBgn0000533	FBgn0027598	FBgn0004244	FBgn0034706	FBgn0064766	FBgn0037374	FBgn0004919	FBgn0039875
FBgn0003464	FBgn0034887	FBgn0030262	FBgn0029839	FBgn0031117	FBgn0039118	FBgn0038946	FBgn0020647	FBgn0030847	FBgn0027552	FBgn0038250	FBgn0000477
FBgn0004373	FBgn0087005	FBgn0039854	FBgn0031939	FBgn0083956	FBgn0015925	FBgn0040271	FBgn0034618	FBgn0052547	FBgn0053513	FBgn0031055	FBgn0004914
FBgn0037743	FBgn0032688	FBgn0015038	FBgn0036196	FBgn0001085	FBgn0035343	FBgn0037754	FBgn0023535	FBgn0031842	FBgn0033879	FBgn0025827	FBgn0039022
FBgn0035171	FBgn0032010	FBgn0032243	FBgn0037726	FBgn0011723	FBgn0029766	FBgn0029088	FBgn0043043	FBgn0023510	FBgn0051777	FBgn0085383	FBgn0041629
FBgn0033088	FBgn0004118	FBgn0029762	FBgn0053144	FBgn0002733	FBgn0038752	FBgn0036446	FBgn0085437	FBgn0250788	FBgn0038603	FBgn0010406	FBgn0030603
FBgn0037659	FBgn0038839	FBgn0015034	FBgn0259111	FBgn0033524	FBgn0034093	FBgn0035986	FBgn0040096	FBgn0034583	FBgn0032076	FBgn0038849	FBgn0030484
FBgn0026374	FBgn0042129	FBgn0023407	FBgn0035770	FBgn0011834	FBgn0052626	FBgn0052225	FBgn0259734	FBgn0010409	FBgn0035588	FBgn0038749	FBgn0037779
FBgn0032221	FBgn0039290	FBgn0038331	FBgn0038479	FBgn0033633	FBgn0022355	FBgn0031294	FBgn0031528	FBgn0087035	FBgn0086673	FBgn0043578	FBgn0052091
FBgn0050419	FBgn0050343	FBgn0034724	FBgn0035733	FBgn0036551	FBgn0033913	FBgn0024277	FBgn0027546	FBgn0010105	FBgn0035091	FBgn0033793	FBgn0033844
FBgn0036134	FBgn0033134	FBgn0034312	FBgn0038071	FBgn0050502	FBgn0020412	FBgn0035112	FBgn0030418	FBgn0005561	FBgn0259682	FBgn0013303	FBgn0025683
FBgn0011259	FBgn0001624	FBgn0039038	FBgn0028518	FBgn0086368	FBgn0030518	FBgn0028500	FBgn0028939	FBgn0032166	FBgn0030925	FBgn0036876	FBgn0033913
FBgn0027453	FBgn0026415	FBgn0015794	FBgn0038484	FBgn0034628	FBgn0052702	FBgn0261085	FBgn0000594	FBgn0259167	FBgn0033644	FBgn0029712	FBgn0052702
FBgn0034950	FBgn0050203	FBgn0039321	FBgn0051823	FBgn0038037	FBgn0046302	FBgn0028523	FBgn0034368	FBgn0051729	FBgn0023477	FBgn0039690	FBgn0004885
FBgn0034485	FBgn0020907	FBgn0020257	FBgn0015286	FBgn0028399	FBgn0001224	FBgn0033304	FBgn0050042	FBgn0261020	FBgn0046114	FBgn0030478	FBgn0032820
FBgn0052333	FBgn0003390	FBgn0030672	FBgn0024179	FBgn0259167	FBgn0035529	FBgn0031275	FBgn0003366	FBgn0000115	FBgn0029823	FBgn0051199	FBgn0032603
FBgn0032100	FBgn0051100	FBgn0027583	FBgn0032076	FBgn0032124	FBgn0026602	FBgn0038108	FBgn0016920	FBgn0030658	FBgn0015558	FBgn0053056	FBgn0034723
FBgn0031765	FBgn0013973	FBgn0024963	FBgn0035588	FBgn0003423	FBgn0032123	FBgn0036211	FBgn0028342	FBgn0031973	FBgn0023174	FBgn0010114	FBgn0032642
FBgn0038202	FBgn0051235	FBgn0085359	FBgn0004456	FBgn0004629	FBgn0032820	FBgn0017590	FBgn0037697	FBgn0028490	FBgn0024957	FBgn0003090	FBgn0033215
FBgn0020503	FBgn0004635	FBgn0030766	FBgn0033395	FBgn0030350	FBgn0052600	FBgn0035227	FBgn0259226	FBgn0052196	FBgn0028430	FBgn0260400	FBgn0004868
FBgn0052843	FBgn0040321	FBgn0031268	FBgn0035995	FBgn0034045	FBgn0029155	FBgn0011739	FBgn0037765	FBgn0035813	FBgn0000536	FBgn0035076	FBgn0000492
FBgn0039089	FBgn0038463	FBgn0027590	FBgn0085427	FBgn0026197	FBgn0034723	FBgn0039600	FBgn0034139	FBgn0035146	FBgn0031478	FBgn0033486	FBgn0003867
FBgn0038427	FBgn0004595	FBgn0040236	FBgn0259822	FBgn0038420	FBgn0010473	FBgn0003651	FBgn0032025	FBgn0022710	FBgn0025740	FBgn0033158	FBgn0012034
FBgn0086909	FBgn0039316	FBgn0030271	FBgn0037972	FBgn0008636	FBgn0028539	FBgn0035649	FBgn0032896	FBgn0011656	FBgn0038721	FBgn0035896	FBgn0032482
FBgn0038407	FBgn0260943	FBgn0031869	FBgn0259712	FBgn0020415	FBgn0003515	FBgn0261258	FBgn0040382	FBgn0029853	FBgn0038980	FBgn0004179	FBgn0039612
FBgn0035575	FBgn0031289	FBgn0038536	FBgn0015036	FBgn0029839	FBgn0012034	FBgn0033474	FBgn0029821	FBgn0030941	FBgn0036449	FBgn0002930	FBgn0038519
FBgn0038826	FBgn0025697	FBgn0036302	FBgn0039304	FBgn0032156	FBgn0025693	FBgn0036318	FBgn0010052	FBgn0034903	FBgn0013772	FBgn0031384	FBgn0039827
FBgn0260486	FBgn0043792	FBgn0039530	FBgn0000455	FBgn0031939	FBgn0031836	FBgn0033463	FBgn0037601	FBgn0016059	FBgn0010222	FBgn0035379	FBgn0013763
FBgn0030572	FBgn0002917	FBgn0038126	FBgn0038980	FBgn0036196	FBgn0039827	FBgn0005536	FBgn0014031	FBgn0035375	FBgn0259818	FBgn0038733	FBgn0015558
FBgn0038143	FBgn0028396	FBgn0026369	FBgn0036449	FBgn0085257	FBgn0033241	FBgn0013799	FBgn0039161	FBgn0027844	FBgn0052311	FBgn0051778	FBgn0036381
FBgn0037917	FBgn0020224	FBgn0000533	FBgn0035313	FBgn0024754	FBgn0035941	FBgn0086690	FBgn0034972	FBgn0053156	FBgn0027932	FBgn0030029	FBgn0033366
FBgn0024558	FBgn0036101	FBgn0031117	FBgn0037108	FBgn0053144	FBgn0036381	FBgn0020391	FBgn0035260	FBgn0037900	FBgn0062442	FBgn0083940	FBgn0031245
FBgn0051635	FBgn0036680	FBgn0083956	FBgn0020912	FBgn0259111	FBgn0037070	FBgn0260941	FBgn0039297	FBgn0039904	FBgn0051248	FBgn0038195	FBgn0261015
FBgn0037061	FBgn0015766	FBgn0002733	FBgn0037019	FBgn0038479	FBgn0036762	FBgn0035321	FBgn0046875	FBgn0032505	FBgn0039118	FBgn0015032	FBgn0037687
FBgn0038606	FBgn0039298	FBgn0033633	FBgn0031579	FBgn0030912	FBgn0031245	FBgn0039349	FBgn0259714	FBgn0010620	FBgn0027070	FBgn0035140	FBgn0036566
FBgn0025833	FBgn0030412	FBgn0039656	FBgn0027598	FBgn0053178	FBgn0037623	FBgn0041210	FBgn0014002	FBgn0052984	FBgn0000477	FBgn0030316	FBgn0002526
FBgn0012344	FBgn0053203	FBgn0036551	FBgn0051248	FBgn0028518	FBgn0037687	FBgn0035521	FBgn0010263	FBgn0024184	FBgn0038742	FBgn0038460	FBgn0004117
FBgn0039907	FBgn0026872	FBgn0086368	FBgn0039118	FBgn0015776	FBgn0029896	FBgn0003891	FBgn0037684	FBgn0037200	FBgn0004914	FBgn0032515	FBgn0045823
FBgn0037026	FBgn0259977	FBgn0000459	FBgn0025865	FBgn0051823	FBgn0036566	FBgn0025676	FBgn0034248	FBgn0035769	FBgn0030347	FBgn0011576	FBgn0019929
FBgn0037818	FBgn0085440	FBgn0038037	FBgn0029766	FBgn0051871	FBgn0026189	FBgn0032688	FBgn0011205	FBgn0024232	FBgn0039022	FBgn0030841	FBgn0034709
FBgn0052521	FBgn0025726	FBgn0033972	FBgn0038752	FBgn0033853	FBgn0004652	FBgn0004118	FBgn0032685	FBgn0038307	FBgn0030603	FBgn0013342	FBgn0041579
FBgn0037636	FBgn0033958	FBgn0014863	FBgn0038070	FBgn0027493	FBgn0045823	FBgn0021872	FBgn0037715	FBgn0039562	FBgn0030484	FBgn0086372	FBgn0015040
FBgn0069969	FBgn0030304	FBgn0085319	FBgn0034093	FBgn0038603	FBgn0026565	FBgn0038839	FBgn0027584	FBgn0039690	FBgn0037779	FBgn0036202	FBgn0063498
FBgn0004244	FBgn0029137	FBgn0026190	FBgn0259175	FBgn0035588	FBgn0025628	FBgn0039290	FBgn0038422	FBgn0036489	FBgn0033844	FBgn0010401	FBgn0016697
FBgn0038946	FBgn0037163	FBgn0010812	FBgn0022355	FBgn0024320	FBgn0259740	FBgn0050343	FBgn0038795	FBgn0030478	FBgn0025683	FBgn0041605	FBgn0052695
FBgn0040271	FBgn0037853	FBgn0030960	FBgn0030347	FBgn0028582	FBgn0015040	FBgn0033884	FBgn0005612	FBgn0011211	FBgn0033658	FBgn0032213	FBgn0040285
FBgn0037754	FBgn0031466	FBgn0262579	FBgn0053143	FBgn0030925	FBgn0052695	FBgn0050203	FBgn0032713	FBgn0029813	FBgn0033913	FBgn0027491	FBgn0031907
FBgn0029088	FBgn0031627	FBgn0001991	FBgn0030484	FBgn0053098	FBgn0031907	FBgn0020907	FBgn0015037	FBgn0261279	FBgn0030518	FBgn0052311	FBgn0030876
FBgn0036446	FBgn0013949	FBgn0004629	FBgn0003174	FBgn0037485	FBgn0262562	FBgn0000442	FBgn0035720	FBgn0031564	FBgn0052702	FBgn0039930	FBgn0262562
FBgn0035986	FBgn0035022	FBgn0030350	FBgn0025683	FBgn0011695	FBgn0040256	FBgn0051100	FBgn0028622	FBgn0038524	FBgn0004885	FBgn0038984	FBgn0014454
FBgn0052225	FBgn0035477	FBgn0026197	FBgn0039130	FBgn0033395	FBgn0020653	FBgn0013973	FBgn0038917	FBgn0010651	FBgn0032123	FBgn0041604	FBgn0040256
FBgn0031294	FBgn0036882	FBgn0030406	FBgn0052702	FBgn0035995	FBgn0035632	FBgn0260742	FBgn0032162	FBgn0030761	FBgn0032820	FBgn0002592	FBgn0053988
FBgn0024277	FBgn0033710	FBgn0260748	FBgn0046302	FBgn0030260	FBgn0037063	FBgn0051235	FBgn0039742	FBgn0033158	FBgn0040793	FBgn0003141	FBgn0035632
FBgn0035112	FBgn0000535	FBgn0038420	FBgn0031747	FBgn0000536	FBgn0034718	FBgn0004635	FBgn0050280	FBgn0031260	FBgn0026439	FBgn0000179	FBgn0034066
FBgn0028500	FBgn0005616	FBgn0008636	FBgn0086347	FBgn0015036	FBgn0016977	FBgn0052056	FBgn0031637	FBgn0032682	FBgn0032603	FBgn0037676	FBgn0033129
FBgn0261085	FBgn0025885	FBgn0029839	FBgn0029155	FBgn0031478	FBgn0036929	FBgn0004595	FBgn0034501	FBgn0004179	FBgn0028646	FBgn0036821	FBgn0016977
FBgn0052369	FBgn0053120	FBgn0032156	FBgn0033215	FBgn0025740	FBgn0034279	FBgn0025697	FBgn0035282	FBgn0031384	FBgn0033215	FBgn0037028	FBgn0039629
FBgn0028523	FBgn0030218	FBgn0031939	FBgn0028539	FBgn0032946	FBgn0030999	FBgn0031419	FBgn0034151	FBgn0003870	FBgn0000492	FBgn0035246	FBgn0037718
FBgn0033304	FBgn0015576	FBgn0036196	FBgn0031170	FBgn0033919	FBgn0037714	FBgn0002917	FBgn0034264	FBgn0038733	FBgn0003867	FBgn0052407	FBgn0036816
FBgn0031275	FBgn0050148	FBgn0085257	FBgn0025693	FBgn0013772	FBgn0036768	FBgn0032285	FBgn0039205	FBgn0051145	FBgn0012034	FBgn0038925	FBgn0034199
FBgn0038108	FBgn0036260	FBgn0003997	FBgn0035666	FBgn0004865	FBgn0035400	FBgn0020224	FBgn0046878	FBgn0259229	FBgn0032482	FBgn0026319	FBgn0037714
FBgn0017590	FBgn0040697	FBgn0000308	FBgn0040260	FBgn0000504	FBgn0261393	FBgn0029937	FBgn0031879	FBgn0031183	FBgn0039612	FBgn0051321	FBgn0002565
FBgn0029502	FBgn0030997	FBgn0000326	FBgn0040251	FBgn0001098	FBgn0024273	FBgn0020312	FBgn0039075	FBgn0015524	FBgn0038519	FBgn0027562	FBgn0035334
FBgn0035227	FBgn0019662	FBgn0030587	FBgn0035941	FBgn0027598	FBgn0033987	FBgn0040068	FBgn0038930	FBgn0030452	FBgn0039827	FBgn0011655	FBgn0003460
FBgn0031681	FBgn0030847	FBgn0085405	FBgn0037070	FBgn0010389	FBgn0039697	FBgn0030412	FBgn0031141	FBgn0030029	FBgn0013763	FBgn0004369	FBgn0036839
FBgn0011739	FBgn0014000	FBgn0024754	FBgn0040363	FBgn0029766	FBgn0039085	FBgn0053203	FBgn0031002	FBgn0083940	FBgn0036381	FBgn0035802	FBgn0036136
FBgn0039600	FBgn0035985	FBgn0053144	FBgn0031245	FBgn0038752	FBgn0033543	FBgn0023458	FBgn0025592	FBgn0033402	FBgn0037070	FBgn0036992	FBgn0025620
FBgn0003651	FBgn0033502	FBgn0259111	FBgn0037687	FBgn0034093	FBgn0037347	FBgn0000395	FBgn0259174	FBgn0038195	FBgn0000173	FBgn0033579	FBgn0033543
FBgn0036834	FBgn0052850	FBgn0035770	FBgn0259171	FBgn0022355	FBgn0016715	FBgn0026872	FBgn0034229	FBgn0031012	FBgn0033366	FBgn0032846	FBgn0016715
FBgn0035649	FBgn0250788	FBgn0039008	FBgn0026565	FBgn0030347		FBgn0014343	FBgn0001208	FBgn0051075	FBgn0031245	FBgn0015575	FBgn0035976
FBgn0261258	FBgn0037895	FBgn0053178	FBgn0259740	FBgn0030027		FBgn0085440	FBgn0031629	FBgn0260635	FBgn0037687	FBgn0000500
FBgn0033474	FBgn0038498	FBgn0051823	FBgn0034709	FBgn0030603		FBgn0014388	FBgn0031110	FBgn0086365	FBgn0004652	FBgn0003429
FBgn0036318	FBgn0030159	FBgn0051871	FBgn0015040	FBgn0053143		FBgn0029935	FBgn0032139	FBgn0033352	FBgn0026565	FBgn0024555
FBgn0033463	FBgn0010473	FBgn0024179	FBgn0030876	FBgn0030484		FBgn0025726	FBgn0032899	FBgn0035715	FBgn0019929	FBgn0039380
FBgn0013799	FBgn0010105	FBgn0033853	FBgn0040256	FBgn0025683		FBgn0003748	FBgn0035147	FBgn0038369	FBgn0040071	FBgn0052109
FBgn0086690	FBgn0005561	FBgn0037374	FBgn0035632	FBgn0033658		FBgn0027341	FBgn0259234	FBgn0030841	FBgn0030087	FBgn0032813
FBgn0020391	FBgn0032938	FBgn0027493	FBgn0034718	FBgn0015278		FBgn0010039	FBgn0035280	FBgn0052177	FBgn0052677	FBgn0002306
FBgn0038675	FBgn0030157	FBgn0032297	FBgn0038366	FBgn0052702		FBgn0033958	FBgn0032538	FBgn0031996	FBgn0041579	FBgn0027575
FBgn0260941	FBgn0037324	FBgn0036142	FBgn0032085	FBgn0261277		FBgn0011747	FBgn0035090	FBgn0000330	FBgn0052695	FBgn0031538
FBgn0035321	FBgn0031973	FBgn0038603	FBgn0034279	FBgn0032495		FBgn0030304	FBgn0039213	FBgn0010313	FBgn0031907	FBgn0032484
FBgn0035936	FBgn0033880	FBgn0035588	FBgn0011205	FBgn0038198		FBgn0029137	FBgn0033723	FBgn0038207	FBgn0034246	FBgn0031109
FBgn0031016	FBgn0028490	FBgn0024320	FBgn0037714	FBgn0031747		FBgn0025790	FBgn0039755	FBgn0032170	FBgn0262562	FBgn0039040
FBgn0039349	FBgn0000120	FBgn0028582	FBgn0039804	FBgn0034723		FBgn0037853	FBgn0004888	FBgn0033448	FBgn0040256	FBgn0003116
FBgn0041210	FBgn0039151	FBgn0030925	FBgn0001981	FBgn0000492		FBgn0025632	FBgn0003074	FBgn0031174	FBgn0053988	FBgn0033308
FBgn0035521	FBgn0038020	FBgn0050273	FBgn0261393	FBgn0003867		FBgn0031627	FBgn0040726	FBgn0087007	FBgn0035632	FBgn0052758
FBgn0037931	FBgn0037993	FBgn0023477	FBgn0024273	FBgn0031170		FBgn0035022	FBgn0001319	FBgn0022029	FBgn0034718	FBgn0034706
FBgn0024944	FBgn0011758	FBgn0046114	FBgn0042101	FBgn0025693		FBgn0035477	FBgn0038194	FBgn0032880	FBgn0016977	FBgn0026409
FBgn0025676	FBgn0034396	FBgn0011695	FBgn0039085	FBgn0035103		FBgn0036882	FBgn0037228	FBgn0086758	FBgn0039629	FBgn0041585
FBgn0032688	FBgn0259246	FBgn0031374	FBgn0025620	FBgn0040260		FBgn0027548	FBgn0031057	FBgn0037924	FBgn0037718	FBgn0000464
FBgn0004118	FBgn0040513	FBgn0030260	FBgn0033543	FBgn0086784		FBgn0033710	FBgn0030575	FBgn0043070	FBgn0036816	FBgn0029082
FBgn0038839	FBgn0022710	FBgn0035285	FBgn0030509	FBgn0030164		FBgn0000535	FBgn0051103	FBgn0036374	FBgn0034199	FBgn0035290
FBgn0039290	FBgn0044047	FBgn0039045	FBgn0016715	FBgn0013763		FBgn0005616	FBgn0039024	FBgn0010894	FBgn0037714	FBgn0085437
FBgn0051323	FBgn0052354	FBgn0024957		FBgn0259234		FBgn0010194	FBgn0017566	FBgn0037240	FBgn0002565	FBgn0259174
FBgn0033884	FBgn0041707	FBgn0259712		FBgn0035557		FBgn0040297	FBgn0031703	FBgn0037979	FBgn0039172	FBgn0259229
FBgn0037098	FBgn0034117	FBgn0085194		FBgn0037623		FBgn0036260	FBgn0033763	FBgn0028662	FBgn0261393	FBgn0036509
FBgn0050203	FBgn0033742	FBgn0031478		FBgn0029639		FBgn0085430	FBgn0032836	FBgn0032801	FBgn0035334	FBgn0033159
FBgn0020907	FBgn0030926	FBgn0025740		FBgn0004117		FBgn0040697	FBgn0030731	FBgn0031514	FBgn0031980	FBgn0031636
FBgn0051100	FBgn0030941	FBgn0038977		FBgn0034438		FBgn0260935	FBgn0034920	FBgn0000179	FBgn0039697	FBgn0027546
FBgn0013973	FBgn0038076	FBgn0038980		FBgn0004652		FBgn0085369	FBgn0260499	FBgn0053099	FBgn0031298	FBgn0035538
FBgn0260742	FBgn0027544	FBgn0033919		FBgn0025628		FBgn0036369	FBgn0029971	FBgn0039486	FBgn0025620	FBgn0032752
FBgn0051235	FBgn0039938	FBgn0036449		FBgn0259740		FBgn0030997	FBgn0010808	FBgn0024509	FBgn0033543	FBgn0036844
FBgn0004635	FBgn0035623	FBgn0013772		FBgn0015040		FBgn0019662	FBgn0031695	FBgn0030060	FBgn0016715	FBgn0033249
FBgn0052056	FBgn0035544	FBgn0037019		FBgn0030876		FBgn0030847	FBgn0040658	FBgn0050159	FBgn0035976	FBgn0037050
FBgn0004595	FBgn0004242	FBgn0027598		FBgn0262562		FBgn0052547	FBgn0034330	FBgn0020255		FBgn0053548
FBgn0025697	FBgn0037612	FBgn0010389		FBgn0033798		FBgn0023510	FBgn0037763	FBgn0052407		FBgn0040777
FBgn0031419	FBgn0027844	FBgn0001297		FBgn0037063		FBgn0052850	FBgn0053547	FBgn0026199		FBgn0004167
FBgn0002917	FBgn0004575	FBgn0033033		FBgn0034718		FBgn0250788	FBgn0030348	FBgn0037874		FBgn0032536
FBgn0032285	FBgn0038959	FBgn0004914		FBgn0033129		FBgn0037895	FBgn0051201	FBgn0026319		FBgn0037876
FBgn0035900	FBgn0039816	FBgn0022355		FBgn0016977		FBgn0038498	FBgn0016013	FBgn0035203		FBgn0035102
FBgn0020224	FBgn0038250	FBgn0041629		FBgn0032085		FBgn0034583	FBgn0045842	FBgn0034258		FBgn0029820
FBgn0029937	FBgn0031055	FBgn0030603		FBgn0036929		FBgn0039505	FBgn0039817	FBgn0011655		FBgn0053517
FBgn0020312	FBgn0039904	FBgn0053143		FBgn0051005		FBgn0010105	FBgn0031821	FBgn0037345		FBgn0037697
FBgn0040068	FBgn0025827	FBgn0037126		FBgn0034279		FBgn0005561	FBgn0003308	FBgn0035802		FBgn0259226
FBgn0030412	FBgn0031697	FBgn0030484		FBgn0024943		FBgn0032938	FBgn0015561	FBgn0034504		FBgn0033544
FBgn0053203	FBgn0024184	FBgn0039495		FBgn0036768		FBgn0029894	FBgn0031327	FBgn0033579		FBgn0051176
FBgn0023458	FBgn0035769	FBgn0259226		FBgn0033987		FBgn0001139	FBgn0053639	FBgn0032846		FBgn0032896
FBgn0026872	FBgn0038849	FBgn0025683		FBgn0039085		FBgn0028490	FBgn0033724	FBgn0260000		FBgn0086348
FBgn0014343	FBgn0038749	FBgn0261277		FBgn0036839		FBgn0038020	FBgn0037552	FBgn0053517		FBgn0004784
FBgn0085440	FBgn0043578	FBgn0038198		FBgn0037347		FBgn0036317	FBgn0015577	FBgn0259735		FBgn0040382
FBgn0014388	FBgn0033793	FBgn0026439		FBgn0016715		FBgn0037993	FBgn0010473	FBgn0024555		FBgn0044323
FBgn0029935	FBgn0013303	FBgn0034723		FBgn0035976		FBgn0011758	FBgn0030679	FBgn0051694		FBgn0052677
FBgn0029118	FBgn0039114	FBgn0000492		FBgn0260004		FBgn0034396	FBgn0050296	FBgn0032908		FBgn0030554
FBgn0038332	FBgn0036876	FBgn0003867				FBgn0085420	FBgn0038172	FBgn0042135		FBgn0085447
FBgn0025726	FBgn0259213	FBgn0012034				FBgn0044047	FBgn0260941	FBgn0053696		FBgn0051145
FBgn0003748	FBgn0039411	FBgn0035103				FBgn0052354	FBgn0031646	FBgn0086604		FBgn0010052
FBgn0027341	FBgn0051199	FBgn0038063				FBgn0031632	FBgn0037635	FBgn0039380		FBgn0004407
FBgn0010039	FBgn0004797	FBgn0040260				FBgn0041707	FBgn0029830	FBgn0039249		FBgn0032704
FBgn0033958	FBgn0010114	FBgn0034540				FBgn0036899	FBgn0031925	FBgn0013334		FBgn0034972
FBgn0011747	FBgn0260400	FBgn0030164				FBgn0030941	FBgn0038877	FBgn0023545		FBgn0036225
FBgn0030304	FBgn0035076	FBgn0013763				FBgn0027544	FBgn0052191	FBgn0032813		FBgn0021814
FBgn0029137	FBgn0035896	FBgn0000173				FBgn0003557	FBgn0016075	FBgn0030309		FBgn0040351
FBgn0025790	FBgn0032682	FBgn0034509				FBgn0004242	FBgn0042627	FBgn0259210		FBgn0046875
FBgn0037853	FBgn0002930	FBgn0035557				FBgn0027844	FBgn0040234	FBgn0010412		FBgn0010263
FBgn0025632	FBgn0035379	FBgn0000562				FBgn0004575	FBgn0039635	FBgn0033308		FBgn0039204
FBgn0031627	FBgn0038733	FBgn0037623				FBgn0039816	FBgn0027580	FBgn0023507		FBgn0259985
FBgn0035022	FBgn0051778	FBgn0020294				FBgn0015379	FBgn0037239	FBgn0032587		FBgn0052808
FBgn0035477	FBgn0015524	FBgn0002526				FBgn0039904	FBgn0001259	FBgn0052758		FBgn0004580
FBgn0036882	FBgn0083940	FBgn0004117				FBgn0033769	FBgn0031449	FBgn0025469		FBgn0032685
FBgn0027548	FBgn0015032	FBgn0034438				FBgn0051638	FBgn0039728	FBgn0036143		FBgn0027584
FBgn0033710	FBgn0051075	FBgn0031232				FBgn0031697	FBgn0000422	FBgn0026409		FBgn0035253
FBgn0000535	FBgn0032515	FBgn0032800				FBgn0015524	FBgn0044812	FBgn0000100		FBgn0033104
FBgn0005616	FBgn0011576	FBgn0045823				FBgn0035769	FBgn0000061	FBgn0085437		FBgn0028497
FBgn0050480	FBgn0259935	FBgn0052066				FBgn0033793	FBgn0031815	FBgn0039303		FBgn0243513
FBgn0010194	FBgn0040398	FBgn0040071				FBgn0013303	FBgn0039481	FBgn0023213		FBgn0051119
FBgn0040022	FBgn0032181	FBgn0259740				FBgn0024232	FBgn0036547	FBgn0040096		FBgn0015037
FBgn0040297	FBgn0030816	FBgn0034709				FBgn0029712	FBgn0051207	FBgn0038950		FBgn0035720
FBgn0036260	FBgn0013342	FBgn0037297				FBgn0037703	FBgn0029891	FBgn0033717		FBgn0034634
FBgn0085430	FBgn0037057	FBgn0031926				FBgn0037822	FBgn0016032	FBgn0259174		FBgn0032741
FBgn0040697	FBgn0086372	FBgn0015040				FBgn0039411	FBgn0027560	FBgn0034440		FBgn0028622
FBgn0260935	FBgn0036202	FBgn0030876				FBgn0000014	FBgn0036262	FBgn0259734		FBgn0038917
FBgn0085369	FBgn0010401	FBgn0035632				FBgn0033538	FBgn0034137	FBgn0036509		FBgn0034755
FBgn0036369	FBgn0041605	FBgn0034066				FBgn0010114	FBgn0040600	FBgn0035206		FBgn0039742
FBgn0030997	FBgn0032213	FBgn0039494				FBgn0040395	FBgn0035480	FBgn0085434		FBgn0027547
FBgn0019662	FBgn0027491	FBgn0037063				FBgn0014009	FBgn0010051	FBgn0052813		FBgn0029814
FBgn0035371	FBgn0031675	FBgn0033129				FBgn0260400	FBgn0003162	FBgn0010473		FBgn0032006
FBgn0030847	FBgn0031428	FBgn0016977				FBgn0004179	FBgn0030262	FBgn0031256		FBgn0035155
FBgn0052547	FBgn0052311	FBgn0039629				FBgn0031384	FBgn0000261	FBgn0030418		FBgn0031637
FBgn0023510	FBgn0038299	FBgn0036929				FBgn0038733	FBgn0052549	FBgn0028939		FBgn0035282
FBgn0052850	FBgn0039930	FBgn0039969				FBgn0030615	FBgn0034795	FBgn0037140		FBgn0046685
FBgn0250788	FBgn0038984	FBgn0036816				FBgn0030452	FBgn0019985	FBgn0040777		FBgn0026375
FBgn0037895	FBgn0261089	FBgn0004569				FBgn0083940	FBgn0015038	FBgn0000594		FBgn0034264
FBgn0038498	FBgn0034588	FBgn0026872				FBgn0038195	FBgn0259896	FBgn0004198		FBgn0046878
FBgn0039505	FBgn0010435	FBgn0039804				FBgn0035482	FBgn0038260	FBgn0085438		FBgn0038930
FBgn0027339	FBgn0003326	FBgn0033987				FBgn0003042	FBgn0037873	FBgn0004167		FBgn0036043
FBgn0010105	FBgn0037835	FBgn0003460				FBgn0035140	FBgn0037891	FBgn0035102		FBgn0031099
FBgn0005561	FBgn0003141	FBgn0046999				FBgn0034996	FBgn0039611	FBgn0016920		FBgn0037238
FBgn0032938	FBgn0000053	FBgn0037347				FBgn0025682	FBgn0015034	FBgn0028342		FBgn0001565
FBgn0029894	FBgn0000179	FBgn0016715				FBgn0032515	FBgn0019957	FBgn0042630		FBgn0037798
FBgn0031598	FBgn0051719	FBgn0035976				FBgn0028916	FBgn0034724	FBgn0259226		FBgn0033677
FBgn0001139	FBgn0035086	FBgn0259213				FBgn0030841	FBgn0028496	FBgn0033544		FBgn0001263
FBgn0028490	FBgn0037396					FBgn0052177	FBgn0034321	FBgn0040382		FBgn0001208
FBgn0030400	FBgn0037676					FBgn0013342	FBgn0029769	FBgn0039844		FBgn0015663
FBgn0038020	FBgn0039630					FBgn0086372	FBgn0039321	FBgn0032727		FBgn0028953
FBgn0036317	FBgn0036742					FBgn0036202	FBgn0032744	FBgn0030306		FBgn0027525
FBgn0037993	FBgn0036821					FBgn0033603	FBgn0259164	FBgn0033199		FBgn0032139
FBgn0011758	FBgn0037028					FBgn0001086	FBgn0030745	FBgn0085417		FBgn0030812
FBgn0034396	FBgn0035246					FBgn0033925	FBgn0054054	FBgn0037601		FBgn0034959
FBgn0085420	FBgn0037146					FBgn0032378	FBgn0032022	FBgn0039946		FBgn0005564
FBgn0044047	FBgn0052407					FBgn0041605	FBgn0003892	FBgn0036999		FBgn0052451
FBgn0052354	FBgn0026319					FBgn0037120	FBgn0250906	FBgn0039161		FBgn0259234
FBgn0031632	FBgn0051321					FBgn0002543	FBgn0027590	FBgn0032704		FBgn0003068
FBgn0041707	FBgn0027562					FBgn0027491	FBgn0030271	FBgn0035260		FBgn0028572
FBgn0036899	FBgn0011655					FBgn0031174	FBgn0031869	FBgn0013811		FBgn0039081
FBgn0031708	FBgn0004369					FBgn0050476	FBgn0034276	FBgn0039297		FBgn0035090
FBgn0027544	FBgn0036992					FBgn0031675	FBgn0000527	FBgn0046875		FBgn0260944
FBgn0003557	FBgn0033579					FBgn0039889	FBgn0038126	FBgn0260857		FBgn0033188
FBgn0039938	FBgn0015575					FBgn0036398	FBgn0052068	FBgn0014002		FBgn0036740
FBgn0004242	FBgn0000500					FBgn0033631	FBgn0031530	FBgn0034963		FBgn0086367
FBgn0027844	FBgn0033356					FBgn0261089	FBgn0024289	FBgn0039109		FBgn0259178
FBgn0004575	FBgn0003429					FBgn0034588	FBgn0029608	FBgn0034248		FBgn0040726
FBgn0039816	FBgn0024555					FBgn0037924	FBgn0033633	FBgn0036811		FBgn0001319
FBgn0034180	FBgn0019643					FBgn0003326	FBgn0039656	FBgn0037715		FBgn0030575
FBgn0015379	FBgn0039380					FBgn0037835	FBgn0032506	FBgn0038422		FBgn0051103
FBgn0039904	FBgn0041710					FBgn0000179	FBgn0259167	FBgn0051119		FBgn0039024
FBgn0033769	FBgn0016126					FBgn0035086	FBgn0037974	FBgn0035720		FBgn0039723
FBgn0051638	FBgn0032813					FBgn0037676	FBgn0014863	FBgn0033699		FBgn0031703
FBgn0031697	FBgn0002306					FBgn0034300	FBgn0026190	FBgn0035906		FBgn0033763
FBgn0038890	FBgn0027575					FBgn0037028	FBgn0034382	FBgn0034634		FBgn0038065
FBgn0015524	FBgn0031538					FBgn0028931	FBgn0016122	FBgn0028622		FBgn0020521
FBgn0033793	FBgn0032484					FBgn0035246	FBgn0262579	FBgn0039315		FBgn0034920
FBgn0052425	FBgn0020385					FBgn0052407	FBgn0040705	FBgn0038917		FBgn0040505
FBgn0013303	FBgn0031109					FBgn0039831	FBgn0001991	FBgn0039094		FBgn0034948
FBgn0024232	FBgn0039040					FBgn0040778	FBgn0031097	FBgn0022984		FBgn0028421
FBgn0029712	FBgn0052758					FBgn0051321	FBgn0004629	FBgn0032006		FBgn0038170
FBgn0037703	FBgn0041630					FBgn0035802	FBgn0030350	FBgn0034590		FBgn0029971
FBgn0039411	FBgn0036143					FBgn0034504	FBgn0034045	FBgn0035282		FBgn0000575
FBgn0033538	FBgn0000464					FBgn0033579	FBgn0034512	FBgn0046685		FBgn0038850
FBgn0010114	FBgn0029082					FBgn0032846	FBgn0038420	FBgn0023508		FBgn0053547
FBgn0040395	FBgn0259878					FBgn0037525	FBgn0008636	FBgn0032799		FBgn0030348
FBgn0260400	FBgn0085437					FBgn0027601	FBgn0020415	FBgn0039075		FBgn0024980
FBgn0004179	FBgn0029170					FBgn0053517	FBgn0050154	FBgn0033760		FBgn0051712
FBgn0031384	FBgn0038412					FBgn0066101	FBgn0035656	FBgn0030362		FBgn0039328
FBgn0038733	FBgn0259174					FBgn0026056	FBgn0032156	FBgn0031141		FBgn0000092
FBgn0085395	FBgn0259229					FBgn0024555	FBgn0031939	FBgn0039596		FBgn0031821
FBgn0030615	FBgn0034440					FBgn0019643	FBgn0085257	FBgn0086706		FBgn0052220
FBgn0035482	FBgn0039770					FBgn0039380	FBgn0026878	FBgn0030311		FBgn0003308
FBgn0003042	FBgn0036509					FBgn0016126	FBgn0000326	FBgn0037279		FBgn0031327
FBgn0035140	FBgn0033159					FBgn0052109	FBgn0030587	FBgn0033665		FBgn0039026
FBgn0030316	FBgn0031636					FBgn0032813	FBgn0037726	FBgn0033677		FBgn0035281
FBgn0034996	FBgn0027546					FBgn0022361	FBgn0259111	FBgn0039087		FBgn0044328
FBgn0032515	FBgn0035538					FBgn0027575	FBgn0039802	FBgn0260942		FBgn0001215
FBgn0030680	FBgn0032752					FBgn0032484	FBgn0039008	FBgn0038619		FBgn0259110
FBgn0030841	FBgn0036844					FBgn0037794	FBgn0053178	FBgn0037293		FBgn0012051
FBgn0052177	FBgn0033249					FBgn0011224	FBgn0026666	FBgn0028953		FBgn0031116
FBgn0013342	FBgn0037050					FBgn0052758	FBgn0025583	FBgn0030812		FBgn0027594
FBgn0086372	FBgn0028939					FBgn0041630	FBgn0031702	FBgn0039323		FBgn0037525
FBgn0036202	FBgn0053548					FBgn0000464	FBgn0259228	FBgn0034013		FBgn0259241
FBgn0033925	FBgn0034567					FBgn0029082	FBgn0085453	FBgn0032899		FBgn0036579
FBgn0041605	FBgn0037140					FBgn0085437	FBgn0030425	FBgn0035147		FBgn0001123
FBgn0037120	FBgn0041706					FBgn0033755	FBgn0034290	FBgn0015031		FBgn0037960
FBgn0002543	FBgn0053517					FBgn0259174	FBgn0051871	FBgn0017545		FBgn0037084
FBgn0027491	FBgn0042630					FBgn0039770	FBgn0033853	FBgn0259234		FBgn0038172
FBgn0031174	FBgn0037697					FBgn0036509	FBgn0027552	FBgn0034803		FBgn0031646
FBgn0031675	FBgn0259226					FBgn0033159	FBgn0053513	FBgn0032082		FBgn0037635
FBgn0039889	FBgn0033544					FBgn0052813	FBgn0083956	FBgn0028572		FBgn0001311
FBgn0036398	FBgn0051176					FBgn0031636	FBgn0051777	FBgn0037998		FBgn0037469
FBgn0033631	FBgn0034139					FBgn0027546	FBgn0030589	FBgn0050051		FBgn0000723
FBgn0261089	FBgn0032025					FBgn0035538	FBgn0038603	FBgn0023520		FBgn0039734
FBgn0034588	FBgn0032896					FBgn0032752	FBgn0032076	FBgn0260944		FBgn0035903
FBgn0037924	FBgn0086348					FBgn0036844	FBgn0035588	FBgn0034243		FBgn0031791
FBgn0037835	FBgn0004784					FBgn0033249	FBgn0035091	FBgn0033188		FBgn0030259
FBgn0000179	FBgn0040382					FBgn0030418	FBgn0259682	FBgn0032381		FBgn0038877
FBgn0036518	FBgn0052677					FBgn0037050	FBgn0052150	FBgn0039213		FBgn0039286
FBgn0037855	FBgn0085447					FBgn0034567	FBgn0030925	FBgn0033429		FBgn0052191
FBgn0035086	FBgn0051145					FBgn0037140	FBgn0033644	FBgn0035244		FBgn0011693
FBgn0037676	FBgn0035815					FBgn0040777	FBgn0023477	FBgn0003074		FBgn0016076
FBgn0034300	FBgn0243486					FBgn0041706	FBgn0046114	FBgn0001319		FBgn0036627
FBgn0037028	FBgn0037908					FBgn0041184	FBgn0021767	FBgn0036213		FBgn0030897
FBgn0028931	FBgn0014031					FBgn0003366	FBgn0014028	FBgn0039723		FBgn0035142
FBgn0035246	FBgn0039161					FBgn0042630	FBgn0024957	FBgn0015781		FBgn0038617
FBgn0026319	FBgn0034972					FBgn0033584	FBgn0028430	FBgn0052448		FBgn0000422
FBgn0040778	FBgn0035260					FBgn0260960	FBgn0000536	FBgn0031703		FBgn0044812
FBgn0034504	FBgn0036225					FBgn0031811	FBgn0259216	FBgn0031497		FBgn0036547
FBgn0033579	FBgn0037941					FBgn0051922	FBgn0051205	FBgn0086357		FBgn0051345
FBgn0032846	FBgn0040351					FBgn0040382	FBgn0031830	FBgn0001942		FBgn0085382
FBgn0037525	FBgn0046875					FBgn0051145	FBgn0036587	FBgn0260642		FBgn0015924
FBgn0053517	FBgn0034974					FBgn0030510	FBgn0031478	FBgn0026874		FBgn0051207
FBgn0066101	FBgn0259714					FBgn0085409	FBgn0025740	FBgn0039450		FBgn0085387
FBgn0026056	FBgn0010263					FBgn0039946	FBgn0038977	FBgn0010380		FBgn0033876
FBgn0000500	FBgn0259985					FBgn0038301	FBgn0038721	FBgn0035639		FBgn0040600
FBgn0003429	FBgn0052808					FBgn0037908	FBgn0000153	FBgn0260499		FBgn0027596
FBgn0024555	FBgn0004580					FBgn0004407	FBgn0033919	FBgn0029971		FBgn0052672
FBgn0019643	FBgn0032685					FBgn0035260	FBgn0013772	FBgn0083967		FBgn0003162
FBgn0039380	FBgn0027584					FBgn0037941	FBgn0259818	FBgn0086913		FBgn0052549
FBgn0051122	FBgn0035253					FBgn0040351	FBgn0035241	FBgn0034032		FBgn0039611
FBgn0016126	FBgn0038422					FBgn0259714	FBgn0047038	FBgn0037473		FBgn0031530
FBgn0032813	FBgn0038795					FBgn0035951	FBgn0000477	FBgn0024980		FBgn0023407
FBgn0022361	FBgn0028497					FBgn0050389	FBgn0038070	FBgn0051712		FBgn0085370
FBgn0027575	FBgn0051119					FBgn0260634	FBgn0001091	FBgn0033912		FBgn0033268
FBgn0032484	FBgn0015037					FBgn0052808	FBgn0004914	FBgn0030327		FBgn0053993
FBgn0037794	FBgn0085446					FBgn0004580	FBgn0039022	FBgn0003517		FBgn0022027
FBgn0011224	FBgn0010403					FBgn0016693	FBgn0041629	FBgn0039328		FBgn0260659
FBgn0033308	FBgn0034634					FBgn0037521	FBgn0037126	FBgn0037989		FBgn0034997
FBgn0036143	FBgn0032741					FBgn0035253	FBgn0030484	FBgn0015789		FBgn0052485
FBgn0000464	FBgn0038917					FBgn0033104	FBgn0039495	FBgn0039747		FBgn0050373
FBgn0029082	FBgn0050172					FBgn0051361	FBgn0037779	FBgn0003308		FBgn0039321
FBgn0085437	FBgn0053543					FBgn0028497	FBgn0052091	FBgn0021795		FBgn0033483
FBgn0033755	FBgn0027547					FBgn0051119	FBgn0033844	FBgn0039026		FBgn0020257
FBgn0259174	FBgn0004168					FBgn0034634	FBgn0025683	FBgn0032187		FBgn0054054
FBgn0039770	FBgn0029814					FBgn0032741	FBgn0033913	FBgn0001215		FBgn0000287
FBgn0036509	FBgn0034128					FBgn0038917	FBgn0052702	FBgn0085395		FBgn0032022
FBgn0026749	FBgn0037206					FBgn0034755	FBgn0261277	FBgn0005660		FBgn0034135
FBgn0033159	FBgn0026375					FBgn0050172	FBgn0027596	FBgn0034286		FBgn0038926
FBgn0052813	FBgn0034264					FBgn0053543	FBgn0004885	FBgn0260487		FBgn0027590
FBgn0031636	FBgn0046878					FBgn0030276	FBgn0038198	FBgn0023096		FBgn0004435
FBgn0027546	FBgn0038930					FBgn0004168	FBgn0032820	FBgn0259241		FBgn0030271
FBgn0035538	FBgn0031099					FBgn0029814	FBgn0026439	FBgn0001123		FBgn0034050
FBgn0032752	FBgn0033484					FBgn0030883	FBgn0032603	FBgn0034975		FBgn0036302
FBgn0036844	FBgn0031141					FBgn0034542	FBgn0027600	FBgn0028664		FBgn0015949
FBgn0033249	FBgn0025790					FBgn0034128	FBgn0028646	FBgn0020381		FBgn0034276
FBgn0030418	FBgn0034471					FBgn0023508	FBgn0034723	FBgn0004864		FBgn0039530
FBgn0037050	FBgn0039864					FBgn0037206	FBgn0033215	FBgn0037084		FBgn0000527
FBgn0028939	FBgn0034010					FBgn0026375	FBgn0083975	FBgn0259140		FBgn0000346
FBgn0034567	FBgn0037238					FBgn0033783	FBgn0038840	FBgn0005632		FBgn0030230
FBgn0037140	FBgn0036713					FBgn0039205	FBgn0000492	FBgn0260941		FBgn0038581
FBgn0040777	FBgn0037798					FBgn0039075	FBgn0003867	FBgn0065110		FBgn0026438
FBgn0041706	FBgn0001263					FBgn0031099	FBgn0012034	FBgn0010391		FBgn0029608
FBgn0041184	FBgn0034229					FBgn0030362	FBgn0035103	FBgn0034476		FBgn0030961
FBgn0003366	FBgn0001208					FBgn0033484	FBgn0031836	FBgn0031791		FBgn0005775
FBgn0042630	FBgn0028953					FBgn0037238	FBgn0032511	FBgn0053527		FBgn0000459
FBgn0031811	FBgn0031629					FBgn0036713	FBgn0038063	FBgn0037503		FBgn0038037
FBgn0051922	FBgn0032139					FBgn0037798	FBgn0039612	FBgn0031054		FBgn0028399
FBgn0040382	FBgn0031116					FBgn0000719	FBgn0039827	FBgn0024994		FBgn0259167
FBgn0044323	FBgn0034959					FBgn0028953	FBgn0034540	FBgn0039286		FBgn0039862
FBgn0051145	FBgn0032899					FBgn0027525	FBgn0053098	FBgn0052191		FBgn0026190
FBgn0030510	FBgn0028374					FBgn0051849	FBgn0032666	FBgn0034095		FBgn0030520
FBgn0039946	FBgn0052451					FBgn0031116	FBgn0030164	FBgn0034743		FBgn0035719
FBgn0038301	FBgn0259234					FBgn0030812	FBgn0013763	FBgn0019968		FBgn0028888
FBgn0243486	FBgn0003068					FBgn0034959	FBgn0015558	FBgn0015288		FBgn0038679
FBgn0037908	FBgn0028572					FBgn0032899	FBgn0037070	FBgn0014037		FBgn0003423
FBgn0004407	FBgn0039081					FBgn0034644	FBgn0030161	FBgn0000061		FBgn0001991
FBgn0035260	FBgn0023520					FBgn0052451	FBgn0033366	FBgn0035449		FBgn0004629
FBgn0037941	FBgn0035280					FBgn0003068	FBgn0036762	FBgn0034035		FBgn0030350
FBgn0040351	FBgn0035090					FBgn0028572	FBgn0031245	FBgn0051974		FBgn0003430
FBgn0259714	FBgn0001229					FBgn0039081	FBgn0261015	FBgn0034491		FBgn0004854
FBgn0038223	FBgn0033188					FBgn0023520	FBgn0004117	FBgn0029711		FBgn0037529
FBgn0035951	FBgn0086367					FBgn0001229	FBgn0034438	FBgn0027095		FBgn0034512
FBgn0050389	FBgn0259178					FBgn0034371	FBgn0031232	FBgn0033691		FBgn0030406
FBgn0260634	FBgn0040726					FBgn0260944	FBgn0019929	FBgn0039726		FBgn0038420
FBgn0052808	FBgn0024944					FBgn0033188	FBgn0033203	FBgn0260940		FBgn0008636
FBgn0004580	FBgn0038194					FBgn0259178	FBgn0030087	FBgn0035611		FBgn0036599
FBgn0037521	FBgn0037228					FBgn0037375	FBgn0052677	FBgn0005585		FBgn0029839
FBgn0035253	FBgn0030575					FBgn0024944	FBgn0041579	FBgn0040600		FBgn0085257
FBgn0033104	FBgn0051103					FBgn0039431	FBgn0031926	FBgn0027497		FBgn0000308
FBgn0051361	FBgn0039024					FBgn0030575	FBgn0052695	FBgn0013997		FBgn0030587
FBgn0028497	FBgn0039723					FBgn0039024	FBgn0031907	FBgn0032421		FBgn0024754
FBgn0051119	FBgn0031703					FBgn0039723	FBgn0030558	FBgn0010051		FBgn0051869
FBgn0034634	FBgn0032836					FBgn0015781	FBgn0262562	FBgn0052672		FBgn0000303
FBgn0032741	FBgn0040505					FBgn0034197	FBgn0014454	FBgn0038224		FBgn0039282
FBgn0038917	FBgn0028370					FBgn0039751	FBgn0040256	FBgn0039854		FBgn0025360
FBgn0050172	FBgn0001227					FBgn0010380	FBgn0053988	FBgn0037891		FBgn0030645
FBgn0053543	FBgn0031005					FBgn0040505	FBgn0035632	FBgn0033032		FBgn0053144
FBgn0004168	FBgn0038850					FBgn0028421	FBgn0031850	FBgn0032243		FBgn0037730
FBgn0029814	FBgn0034330					FBgn0028370	FBgn0039494	FBgn0029762		FBgn0053178
FBgn0035357	FBgn0053547					FBgn0001227	FBgn0033129	FBgn0032401		FBgn0038071
FBgn0035282	FBgn0030348					FBgn0031695	FBgn0039629	FBgn0013751		FBgn0031702
FBgn0034542	FBgn0030796					FBgn0000575	FBgn0051005	FBgn0259244		FBgn0051871
FBgn0034128	FBgn0016013					FBgn0031005	FBgn0036816	FBgn0023407		FBgn0024179
FBgn0023508	FBgn0085391					FBgn0029819	FBgn0004569	FBgn0085370		FBgn0020621
FBgn0037206	FBgn0000092					FBgn0030348	FBgn0034199	FBgn0035248		FBgn0027552
FBgn0026375	FBgn0039817					FBgn0034032	FBgn0037714	FBgn0066084		FBgn0051777
FBgn0003048	FBgn0031821					FBgn0037473	FBgn0036768	FBgn0039038		FBgn0038603
FBgn0039075	FBgn0052220					FBgn0030796	FBgn0039804	FBgn0015794		FBgn0024320
FBgn0031099	FBgn0003308					FBgn0051712	FBgn0002565	FBgn0035398		FBgn0028582
FBgn0033484	FBgn0031327					FBgn0030327	FBgn0035334	FBgn0029648		FBgn0052406
FBgn0037238	FBgn0044328					FBgn0037989	FBgn0085423	FBgn0034789		FBgn0050273
FBgn0036713	FBgn0033724					FBgn0039747	FBgn0030844	FBgn0260632		FBgn0046114
FBgn0037798	FBgn0037552					FBgn0052220	FBgn0036839	FBgn0037577		FBgn0031374
FBgn0000719	FBgn0015577					FBgn0015561	FBgn0046999	FBgn0032022		FBgn0030260
FBgn0028953	FBgn0036579					FBgn0039026	FBgn0025620	FBgn0024963		FBgn0035285
FBgn0051849	FBgn0038354					FBgn0030174	FBgn0033543	FBgn0001133		FBgn0023531
FBgn0031116	FBgn0001123					FBgn0044328	FBgn0016715	FBgn0025742		FBgn0033313
FBgn0030812	FBgn0259140					FBgn0001215	FBgn0035976	FBgn0050020		FBgn0019940
FBgn0034959	FBgn0038172					FBgn0085395		FBgn0250906		FBgn0259712
FBgn0005564	FBgn0031646					FBgn0005660		FBgn0031268		FBgn0034645
FBgn0034644	FBgn0037635					FBgn0037117		FBgn0027590		FBgn0029799
FBgn0028374	FBgn0000723					FBgn0014906		FBgn0050421		FBgn0032946
FBgn0052451	FBgn0039734					FBgn0027594		FBgn0040236		FBgn0038540
FBgn0003068	FBgn0035903					FBgn0259241		FBgn0030271		FBgn0000153
FBgn0028572	FBgn0034476					FBgn0015577		FBgn0051812		FBgn0050263
FBgn0039081	FBgn0031791					FBgn0036579		FBgn0039225		FBgn0034172
FBgn0023520	FBgn0031925					FBgn0038354		FBgn0039859		FBgn0033054
FBgn0001229	FBgn0030259					FBgn0001123		FBgn0036302		FBgn0259481
FBgn0260944	FBgn0053527					FBgn0050296		FBgn0085430		FBgn0031061
FBgn0033188	FBgn0037546					FBgn0035283		FBgn0038126		FBgn0022987
FBgn0259178	FBgn0038877					FBgn0037084		FBgn0001169		FBgn0036360
FBgn0036059	FBgn0039286					FBgn0038172		FBgn0052068		FBgn0037108
FBgn0037375	FBgn0052191					FBgn0031972		FBgn0026369		FBgn0030065
FBgn0039431	FBgn0003499					FBgn0036273		FBgn0031530		FBgn0035505
FBgn0039723	FBgn0037239					FBgn0035968		FBgn0001085		FBgn0001098
FBgn0031893	FBgn0011693					FBgn0037469		FBgn0014026		FBgn0038070
FBgn0039751	FBgn0016076					FBgn0039734		FBgn0032506		FBgn0033033
FBgn0052448	FBgn0001259					FBgn0032407		FBgn0036571		FBgn0052626
FBgn0010380	FBgn0036627					FBgn0035903		FBgn0011284		FBgn0030347
FBgn0040505	FBgn0031449					FBgn0034476		FBgn0028399		FBgn0030027
FBgn0028421	FBgn0030897					FBgn0086370		FBgn0033972		FBgn0041629
FBgn0028370	FBgn0000422					FBgn0031791		FBgn0030105		FBgn0041188
FBgn0001227	FBgn0044812					FBgn0030259		FBgn0085319		FBgn0053143
FBgn0031695	FBgn0039481					FBgn0034940		FBgn0039862		FBgn0039495
FBgn0000575	FBgn0036547					FBgn0037546		FBgn0027564		FBgn0035082
FBgn0031005	FBgn0051345					FBgn0038877		FBgn0026190		FBgn0033658
FBgn0030348	FBgn0014859					FBgn0039286		FBgn0035719		FBgn0033913
FBgn0034032	FBgn0015924					FBgn0003499		FBgn0039689		FBgn0020412
FBgn0030796	FBgn0039774					FBgn0016075		FBgn0000416		FBgn0053988
FBgn0051712	FBgn0030773					FBgn0010452		FBgn0260450		FBgn0261277
FBgn0030327	FBgn0051207					FBgn0034095		FBgn0036801		FBgn0034218
FBgn0037989	FBgn0036262					FBgn0032200		FBgn0033460		FBgn0032479
FBgn0039747	FBgn0033876					FBgn0030897		FBgn0003423		FBgn0004885
FBgn0052220	FBgn0040600					FBgn0031286		FBgn0004629		FBgn0037881
FBgn0039026	FBgn0027596					FBgn0035142		FBgn0034027		FBgn0034978
FBgn0030174	FBgn0035480					FBgn0000422		FBgn0030350		FBgn0036146
FBgn0044328	FBgn0003162					FBgn0035449		FBgn0051678		FBgn0032603
FBgn0001215	FBgn0030262					FBgn0037326		FBgn0037897		FBgn0011305
FBgn0005660	FBgn0001319					FBgn0031815		FBgn0026197		FBgn0032642
FBgn0037117	FBgn0052549					FBgn0051345		FBgn0034512		FBgn0003867
FBgn0027594	FBgn0034795					FBgn0014859		FBgn0030406		FBgn0003515
FBgn0015577	FBgn0019985					FBgn0015924		FBgn0031176		FBgn0034622
FBgn0036579	FBgn0015038					FBgn0039774		FBgn0036599		FBgn0033421
FBgn0038354	FBgn0259896					FBgn0016032		FBgn0050154		FBgn0037262
FBgn0001123	FBgn0038260					FBgn0085387		FBgn0036196		FBgn0050295
FBgn0050296	FBgn0039611					FBgn0033876		FBgn0085257		FBgn0035103
FBgn0035283	FBgn0031530					FBgn0040600		FBgn0034493		FBgn0031836
FBgn0034975	FBgn0038331					FBgn0039187		FBgn0030587		FBgn0035181
FBgn0037084	FBgn0034724					FBgn0027497		FBgn0037182		FBgn0011281
FBgn0038172	FBgn0032021					FBgn0013997		FBgn0030645		FBgn0260861
FBgn0031972	FBgn0033268					FBgn0010051		FBgn0053144		FBgn0034540
FBgn0036273	FBgn0028496					FBgn0001319		FBgn0035770		FBgn0086784
FBgn0035968	FBgn0045038					FBgn0039854		FBgn0037730		FBgn0032666
FBgn0037469	FBgn0052485					FBgn0019985		FBgn0019925		FBgn0030164
FBgn0039734	FBgn0029769					FBgn0038260		FBgn0030912		FBgn0039584
FBgn0035903	FBgn0039321					FBgn0050187		FBgn0027836		FBgn0013763
FBgn0034476	FBgn0033483					FBgn0015721		FBgn0024944		FBgn0015558
FBgn0086370	FBgn0054054					FBgn0031530		FBgn0015776		FBgn0000173
FBgn0031791	FBgn0032022					FBgn0029939		FBgn0004003		FBgn0031245
FBgn0030259	FBgn0034135					FBgn0026262		FBgn0051871		FBgn0261015
FBgn0053527	FBgn0085386					FBgn0004381		FBgn0024179		FBgn0020294
FBgn0037546	FBgn0038926					FBgn0031495		FBgn0020621		FBgn0032800
FBgn0038877	FBgn0027590					FBgn0038331		FBgn0037374		FBgn0031304
FBgn0033984	FBgn0004435					FBgn0032021		FBgn0034968		FBgn0045823
FBgn0039286	FBgn0030271					FBgn0033268		FBgn0027493		FBgn0019929
FBgn0003499	FBgn0036302					FBgn0031318		FBgn0053513		FBgn0259166
FBgn0010452	FBgn0034276					FBgn0028496		FBgn0034245		FBgn0032233
FBgn0030897	FBgn0039530					FBgn0034312		FBgn0086673		FBgn0030716
FBgn0031286	FBgn0000527					FBgn0045038		FBgn0024320		FBgn0259740
FBgn0030437	FBgn0000346					FBgn0052485		FBgn0050338		FBgn0034709
FBgn0035142	FBgn0038660					FBgn0039321		FBgn0052150		FBgn0041579
FBgn0000422	FBgn0030230					FBgn0033483		FBgn0028582		FBgn0031926
FBgn0034572	FBgn0038581					FBgn0032744		FBgn0031403		FBgn0063498
FBgn0037326	FBgn0026438					FBgn0020257		FBgn0053098		FBgn0040285
FBgn0051345	FBgn0024289					FBgn0016754		FBgn0039045		FBgn0034072
FBgn0039774	FBgn0029608					FBgn0037850		FBgn0033313		FBgn0030558
FBgn0085387	FBgn0002733					FBgn0038564		FBgn0000536		FBgn0030876
FBgn0033876	FBgn0039656					FBgn0000287		FBgn0259712		FBgn0262562
FBgn0005617	FBgn0030961					FBgn0034135		FBgn0034645		FBgn0014454
FBgn0040600	FBgn0005775					FBgn0038926		FBgn0038547		FBgn0028400
FBgn0039187	FBgn0032506					FBgn0050421		FBgn0250754		FBgn0034066
FBgn0027497	FBgn0000459					FBgn0034050		FBgn0050263		FBgn0039494
FBgn0013997	FBgn0038037					FBgn0037918		FBgn0036360		FBgn0037063
FBgn0010051	FBgn0028399					FBgn0036302		FBgn0037108		FBgn0016977
FBgn0001319	FBgn0033756					FBgn0015949		FBgn0027598		FBgn0039969
FBgn0039854	FBgn0030105					FBgn0039530		FBgn0010389		FBgn0004569
FBgn0019985	FBgn0039862					FBgn0000527		FBgn0039779		FBgn0028487
FBgn0038260	FBgn0026190					FBgn0000346		FBgn0038752		FBgn0024943
FBgn0050187	FBgn0035719					FBgn0038660		FBgn0039875		FBgn0013972
FBgn0015721	FBgn0016122					FBgn0030230		FBgn0000477		FBgn0029903
FBgn0031530	FBgn0033358					FBgn0001169		FBgn0038070		FBgn0034199
FBgn0029693	FBgn0003423					FBgn0038581		FBgn0001091		FBgn0036768
FBgn0013751	FBgn0001991					FBgn0040375		FBgn0034093		FBgn0026415
FBgn0026262	FBgn0031097					FBgn0026369		FBgn0039849		FBgn0039804
FBgn0004381	FBgn0004629					FBgn0026438		FBgn0022355		FBgn0002565
FBgn0031495	FBgn0034045					FBgn0001085		FBgn0029529		FBgn0039172
FBgn0085370	FBgn0003430					FBgn0030961		FBgn0030603		FBgn0017581
FBgn0038331	FBgn0004854					FBgn0036551		FBgn0260858		FBgn0003460
FBgn0032021	FBgn0026197					FBgn0005775		FBgn0037779		FBgn0004908
FBgn0033268	FBgn0034512					FBgn0038056		FBgn0000307		FBgn0046999
FBgn0031318	FBgn0038420					FBgn0032506		FBgn0052702		FBgn0037347
FBgn0028496	FBgn0008636					FBgn0036571		FBgn0046302		FBgn0016715
FBgn0045038	FBgn0020415					FBgn0038037		FBgn0015600		FBgn0002940
FBgn0052485	FBgn0029839					FBgn0028399		FBgn0032123		FBgn0039232
FBgn0039321	FBgn0051216					FBgn0033756		FBgn0032820
FBgn0037105	FBgn0026878					FBgn0039862		FBgn0003495
FBgn0032744	FBgn0030587					FBgn0027564		FBgn0037881
FBgn0020257	FBgn0037726					FBgn0030960		FBgn0034025
FBgn0016754	FBgn0024754					FBgn0030520		FBgn0031379
FBgn0000287	FBgn0000303					FBgn0035719		FBgn0036923
FBgn0034135	FBgn0039282					FBgn0028888		FBgn0031195
FBgn0038926	FBgn0025360					FBgn0032295		FBgn0034723
FBgn0050020	FBgn0037730					FBgn0033358		FBgn0032642
FBgn0035934	FBgn0035733					FBgn0036801		FBgn0028539
FBgn0050421	FBgn0053178					FBgn0003423		FBgn0003867
FBgn0036302	FBgn0038071					FBgn0001991		FBgn0033421
FBgn0015949	FBgn0025583					FBgn0034027		FBgn0035103
FBgn0039530	FBgn0039464					FBgn0003430		FBgn0035181
FBgn0000527	FBgn0031702					FBgn0051678		FBgn0051064
FBgn0000346	FBgn0005658					FBgn0030406		FBgn0032482
FBgn0038660	FBgn0085453					FBgn0008636		FBgn0029962
FBgn0030230	FBgn0030425					FBgn0029839		FBgn0038063
FBgn0001169	FBgn0034290					FBgn0036196		FBgn0260861
FBgn0038581	FBgn0051871					FBgn0085257		FBgn0011297
FBgn0040375	FBgn0024179					FBgn0085405		FBgn0000562
FBgn0026369	FBgn0020621					FBgn0038454		FBgn0020294
FBgn0026438	FBgn0011581					FBgn0037726		FBgn0003118
FBgn0030961	FBgn0027552					FBgn0024754		FBgn0031304
FBgn0005775	FBgn0033067					FBgn0051869		FBgn0045823
FBgn0032506	FBgn0083956					FBgn0000303		FBgn0039857
FBgn0000459	FBgn0051777					FBgn0039282		FBgn0030087
FBgn0038037	FBgn0030589					FBgn0053144		FBgn0259740
FBgn0028399	FBgn0038603					FBgn0000083		FBgn0052677
FBgn0033756	FBgn0032076					FBgn0035733		FBgn0027655
FBgn0039862	FBgn0035091					FBgn0033055		FBgn0015040
FBgn0030960	FBgn0052150					FBgn0026666		FBgn0030876
FBgn0030520	FBgn0028582					FBgn0039464		FBgn0035323
FBgn0035719	FBgn0030925					FBgn0005658		FBgn0032420
FBgn0028888	FBgn0035245					FBgn0024179		FBgn0040256
FBgn0032295	FBgn0052406					FBgn0034951		FBgn0053988
FBgn0022935	FBgn0046114					FBgn0053207		FBgn0037063
FBgn0033358	FBgn0050033					FBgn0032297		FBgn0034718
FBgn0036801	FBgn0034261					FBgn0038603		FBgn0016977
FBgn0003423	FBgn0030260					FBgn0024320		FBgn0036929
FBgn0001991	FBgn0035285					FBgn0035245		FBgn0039969
FBgn0033244	FBgn0259822					FBgn0052406		FBgn0037718
FBgn0034027	FBgn0033313					FBgn0053098		FBgn0036816
FBgn0003430	FBgn0019940					FBgn0046114		FBgn0039265
FBgn0051678	FBgn0028430					FBgn0037556		FBgn0037698
FBgn0030406	FBgn0259712					FBgn0034261		FBgn0011205
FBgn0025519	FBgn0051205					FBgn0030260		FBgn0025839
FBgn0008636	FBgn0085194					FBgn0023081		FBgn0032518
FBgn0029839	FBgn0036587					FBgn0052195		FBgn0019936
FBgn0036196	FBgn0029799					FBgn0015558		FBgn0034199
FBgn0085405	FBgn0032946					FBgn0052590		FBgn0037714
FBgn0024754	FBgn0038540					FBgn0035285		FBgn0036768
FBgn0000303	FBgn0000153					FBgn0033313		FBgn0020655
FBgn0039282	FBgn0013772					FBgn0028484		FBgn0035400
FBgn0025360	FBgn0033054					FBgn0038547		FBgn0039172
FBgn0053144	FBgn0004865					FBgn0029799		FBgn0017581
FBgn0004050	FBgn0259481					FBgn0032946		FBgn0035334
FBgn0035733	FBgn0259818					FBgn0038540		FBgn0033229
FBgn0033055	FBgn0000568					FBgn0031698		FBgn0033543
FBgn0026666	FBgn0022987					FBgn0050263		FBgn0260004
FBgn0039464	FBgn0036360					FBgn0033054
FBgn0005658	FBgn0035505					FBgn0004865
FBgn0024179	FBgn0027598					FBgn0259481
FBgn0034951	FBgn0051248					FBgn0031119
FBgn0039920	FBgn0010389					FBgn0027108
FBgn0011581	FBgn0000477					FBgn0040079
FBgn0032297	FBgn0038070					FBgn0022987
FBgn0038603	FBgn0052523					FBgn0036360
FBgn0024320	FBgn0033033					FBgn0020912
FBgn0035245	FBgn0034076					FBgn0035505
FBgn0052406	FBgn0031306					FBgn0036212
FBgn0037556	FBgn0030347					FBgn0027598
FBgn0034261	FBgn0030027					FBgn0051248
FBgn0085427	FBgn0039022					FBgn0010389
FBgn0030260	FBgn0041629					FBgn0000477
FBgn0052195	FBgn0053143					FBgn0031306
FBgn0015558	FBgn0037126					FBgn0041629
FBgn0052590	FBgn0039495					FBgn0041188
FBgn0035285	FBgn0020412					FBgn0053143
FBgn0033313	FBgn0053988					FBgn0260858
FBgn0028484	FBgn0261277					FBgn0000307
FBgn0036587	FBgn0034218					FBgn0033844
FBgn0038547	FBgn0004885					FBgn0015278
FBgn0029799	FBgn0038198					FBgn0020412
FBgn0032946	FBgn0032820					FBgn0053988
FBgn0038540	FBgn0040502					FBgn0052702
FBgn0031698	FBgn0050158					FBgn0034218
FBgn0050263	FBgn0034978					FBgn0032479
FBgn0030806	FBgn0036146					FBgn0015600
FBgn0033054	FBgn0026439					FBgn0004885
FBgn0004865	FBgn0032603					FBgn0001224
FBgn0259481	FBgn0033215					FBgn0026602
FBgn0031119	FBgn0000492					FBgn0037881
FBgn0027108	FBgn0003867					FBgn0040793
FBgn0040079	FBgn0034622					FBgn0050158
FBgn0022987	FBgn0035103					FBgn0034978
FBgn0036360	FBgn0029962					FBgn0036146
FBgn0035505	FBgn0039612					FBgn0026439
FBgn0036212	FBgn0039827					FBgn0011305
FBgn0051248	FBgn0011281					FBgn0029155
FBgn0010389	FBgn0034540					FBgn0034723
FBgn0033033	FBgn0086784					FBgn0000492
FBgn0031306	FBgn0032666					FBgn0029962
FBgn0041629	FBgn0030164					FBgn0038063
FBgn0034894	FBgn0040251					FBgn0032338
FBgn0041188	FBgn0039584					FBgn0038311
FBgn0053143	FBgn0013763					FBgn0086784
FBgn0260858	FBgn0036381					FBgn0032666
FBgn0000307	FBgn0000173					FBgn0040251
FBgn0033844	FBgn0033366					FBgn0259234
FBgn0015278	FBgn0031245					FBgn0000173
FBgn0020412	FBgn0029639					FBgn0039229
FBgn0043458	FBgn0020294					FBgn0037717
FBgn0053988	FBgn0051125					FBgn0031245
FBgn0052702	FBgn0032800					FBgn0261015
FBgn0034218	FBgn0013767					FBgn0037623
FBgn0032479	FBgn0019929					FBgn0020294
FBgn0015600	FBgn0259166					FBgn0051125
FBgn0004885	FBgn0032233					FBgn0026189
FBgn0001224	FBgn0030716					FBgn0032800
FBgn0026602	FBgn0259740					FBgn0028579
FBgn0037881	FBgn0041579					FBgn0040071
FBgn0040793	FBgn0031926					FBgn0032233
FBgn0050158	FBgn0063498					FBgn0030716
FBgn0034978	FBgn0052695					FBgn0259740
FBgn0036146	FBgn0034072					FBgn0027655
FBgn0026439	FBgn0035964					FBgn0063498
FBgn0011305	FBgn0030558					FBgn0034072
FBgn0031195	FBgn0014454					FBgn0262562
FBgn0029155	FBgn0028400					FBgn0025936
FBgn0259139	FBgn0031850					FBgn0028400
FBgn0029962	FBgn0039494					FBgn0040256
FBgn0038063	FBgn0037063					FBgn0034718
FBgn0032338	FBgn0029810					FBgn0029810
FBgn0039214	FBgn0038366					FBgn0016977
FBgn0038311	FBgn0039629					FBgn0037081
FBgn0086784	FBgn0004569					FBgn0039969
FBgn0032666	FBgn0024943					FBgn0037698
FBgn0040251	FBgn0013972					FBgn0037963
FBgn0039584	FBgn0034199					FBgn0011205
FBgn0259234	FBgn0037714					FBgn0041087
FBgn0036381	FBgn0036768					FBgn0013972
FBgn0037070	FBgn0039804					FBgn0029903
FBgn0000173	FBgn0002565					FBgn0035400
FBgn0039229	FBgn0039172					FBgn0039172
FBgn0037717	FBgn0033987					FBgn0024273
FBgn0031245	FBgn0028875					FBgn0033987
FBgn0037623	FBgn0003460					FBgn0028875
FBgn0020294	FBgn0010399					FBgn0004908
FBgn0051125	FBgn0046999					FBgn0033229
FBgn0026189	FBgn0033543					FBgn0010399
FBgn0032290	FBgn0016715					FBgn0037347
FBgn0032800	FBgn0260004					FBgn0027616
FBgn0013767	FBgn0039232
FBgn0037923
FBgn0028579
FBgn0040071
FBgn0033609
FBgn0032233
FBgn0030716
FBgn0259740
FBgn0027655
FBgn0063498
FBgn0034072
FBgn0030876
FBgn0025936
FBgn0028400
FBgn0029810
FBgn0016977
FBgn0037081
FBgn0037698
FBgn0011205
FBgn0013972
FBgn0029903
FBgn0035400
FBgn0039172
FBgn0024273
FBgn0033987
FBgn0028875
FBgn0036915
FBgn0036735
FBgn0033229
FBgn0010399
FBgn0026326
FBgn0037347
FBgn0030657
FBgn0027616
FBgn0039232
