# Supplementary material for: Rapid sex-specific adaptation to high temperature in Drosophila
Source: eLife. 2020 Feb 21;9:e53237. doi: 10.7554/eLife.53237 (PMC7034977; doi:10.7554/eLife.53237)
Supplement: Supplementary file 5. — The outputs of RcisTarget that test for enrichment of cis-regulatory elements among each set of genes of interest are shown. The identities, expression patterns, and functional descriptions of the TFs that putatively regulates genes of interest are summarized. [file elife-53237-supp5.xlsx]

## Sheet: legend
Supplementary File 5. Enrichment of cis-regulatory elements and identification of putative TFs among genes of interest
genes of interest	N	numbers of enriched CRE	numbers of putative TFs
female-biased	4546	155	64
male-biased	4435	5	7
female-specific up-regulation	1877	64	68
female-specific down-regulation	1203	76	19
male-specific up-regulation	657	205	56
male-specific down-regulation	638	100	47
antagonistic m-up/f-down	154	156	66
antagonistic m-down/f-up	157	159	61

## Sheet: TFs regulating sex-bias
Gene ID	Gene Name	Chr	start	end	strand	evolution.s.ry pattern	description
female-biased
FBgn0000116	Argk	3L	8870576	8888507	-	n.s.	Arginine kinase [Source:FlyBase;Acc:FBgn0000116]
FBgn0000370	crc	2L	20388889	20397368	+	female-specific	cryptocephal [Source:FlyBase;Acc:FBgn0000370]
FBgn0000659	fkh	3R	23616325	23620542	-	n.s.	fork head [Source:FlyBase;Acc:FBgn0000659]
FBgn0001150	gt	X	2127703	2131411	-	concordant	giant [Source:FlyBase;Acc:FBgn0001150]
FBgn0001291	Jra	2R	4343846	4344961	+	n.s.	Jun-related antigen [Source:FlyBase;Acc:FBgn0001291]
FBgn0001297	kay	3R	24776212	24802861	+	n.s.	kayak [Source:FlyBase;Acc:FBgn0001297]
FBgn0001320	kni	3L	19874221	19877217	-	n.s.	knirps [Source:FlyBase;Acc:FBgn0001320]
FBgn0001994	crp	2L	15621987	15645009	-	male-specific	cropped [Source:FlyBase;Acc:FBgn0001994]
FBgn0003053	peb	X	4157215	4165791	+	n.s.	pebbled [Source:FlyBase;Acc:FBgn0003053]
FBgn0003117	pnr	3R	9274202	9288229	-	n.s.	pannier [Source:FlyBase;Acc:FBgn0003117]
FBgn0003345	sd	X	14768202	14790706	+	female-specific	scalloped [Source:FlyBase;Acc:FBgn0003345]
FBgn0003430	slp1	2L	3665027	3666441	+	n.s.	sloppy paired 1 [Source:FlyBase;Acc:FBgn0003430]
FBgn0003499	sr	3R	7218824	7258848	-	concordant	stripe [Source:FlyBase;Acc:FBgn0003499]
FBgn0003687	Tbp	2R	15547369	15548780	-	female-specific	TATA binding protein [Source:FlyBase;Acc:FBgn0003687]
FBgn0003742	tra2	2R	8672546	8674855	-	female-specific	transformer 2 [Source:FlyBase;Acc:FBgn0003742]
FBgn0004101	bs	2R	18132251	18157400	+	female-specific	blistered [Source:FlyBase;Acc:FBgn0004101]
FBgn0004396	CrebA	3L	15161312	15179472	+	female-specific	Cyclic-AMP response element binding protein A [Source:FlyBase;Acc:FBgn0004396]
FBgn0004567	slp2	2L	3676548	3677903	+	n.s.	sloppy paired 2 [Source:FlyBase;Acc:FBgn0004567]
FBgn0004914	Hnf4	2L	8410124	8432781	-	antagonistic	Hepatocyte nuclear factor 4 [Source:FlyBase;Acc:FBgn0004914]
FBgn0010287	Trf	2L	7810849	7812111	+	female-specific	TBP-related factor [Source:FlyBase;Acc:FBgn0010287]
FBgn0011274	Dif	2L	16740046	16759998	-	n.s.	Dorsal-related immunity factor [Source:FlyBase;Acc:FBgn0011274]
FBgn0011763	Dp	2R	7342852	7348761	+	male-specific	DP transcription factor [Source:FlyBase;Acc:FBgn0011763]
FBgn0011766	E2f1	3R	3762576	3802998	+	female-specific	E2F transcription factor 1 [Source:FlyBase;Acc:FBgn0011766]
FBgn0013469	klu	3L	10747254	10749701	-	male-specific	klumpfuss [Source:FlyBase;Acc:FBgn0013469]
FBgn0014343	mirr	3L	12402769	12419355	+	female-specific	mirror [Source:FlyBase;Acc:FBgn0014343]
FBgn0014870	Psi	2R	10885823	10892718	-	male-specific	P-element somatic inhibitor [Source:FlyBase;Acc:FBgn0014870]
FBgn0015396	jumu	3R	14774484	14785813	-	female-specific	jumeau [Source:FlyBase;Acc:FBgn0015396]
FBgn0015602	BEAF-32	2R	8842366	8844525	+	female-specific	Boundary element-associated factor of 32kD [Source:FlyBase;Acc:FBgn0015602]
FBgn0015622	Cnx99A	3R	24331802	24336571	-	male-specific	Calnexin 99A [Source:FlyBase;Acc:FBgn0015622]
FBgn0015664	Dref	2L	9653733	9656833	-	concordant	DNA replication-related element factor [Source:FlyBase;Acc:FBgn0015664]
FBgn0015805	HDAC1	3L	4644622	4647458	+	concordant	Histone deacetylase 1 [Source:FlyBase;Acc:FBgn0015805]
FBgn0015904	ara	3L	12290334	12305536	+	female-specific	araucan [Source:FlyBase;Acc:FBgn0015904]
FBgn0016076	vri	2L	5119111	5124493	+	n.s.	vrille [Source:FlyBase;Acc:FBgn0016076]
FBgn0016694	Pdp1	3L	7682336	7737147	-	female-specific	PAR-domain protein 1 [Source:FlyBase;Acc:FBgn0016694]
FBgn0020309	crol	2L	11416967	11429076	-	n.s.	crooked legs [Source:FlyBase;Acc:FBgn0020309]
FBgn0022361	Pur-alpha	4	472012	479918	+	female-specific	Purine-rich binding protein-alpha [Source:FlyBase;Acc:FBgn0022361]
FBgn0023076	Clk	3L	7640479	7647462	-	female-specific	Clock [Source:FlyBase;Acc:FBgn0023076]
FBgn0023215	Mnt	X	3267993	3300002	+	n.s.
FBgn0024371	E2f2	2L	20228788	20230746	-	female-specific	E2F transcription factor 2 [Source:FlyBase;Acc:FBgn0024371]
FBgn0028550	Atf3	X	1021942	1054564	-	n.s.	Activating transcription factor 3 [Source:FlyBase;Acc:FBgn0028550]
FBgn0029711	Usf	X	4085620	4089185	-	female-specific
FBgn0032202	REPTOR-BP	2L	9933534	9934536	+	n.s.	REPTOR-binding partner [Source:FlyBase;Acc:FBgn0032202]
FBgn0032940	Mondo	2L	20364454	20388186	-	female-specific
FBgn0035625	Blimp-1	3L	5590285	5611295	+	n.s.
FBgn0035957	CG5144	3L	8869214	8870368	+	n.s.
FBgn0036134	FoxK	3L	10875728	10882116	-	male-specific	Forkhead box K [Source:FlyBase;Acc:FBgn0036134]
FBgn0038197	foxo	3R	11158673	11189376	-	female-specific	forkhead box sub-group O [Source:FlyBase;Acc:FBgn0038197]
FBgn0038373	CG4546	3R	9461702	9463825	-	female-specific
FBgn0039169	Spps	3R	19404096	19407745	-	n.s.	Sp1-like factor for pairing sensitive-silencing [Source:FlyBase;Acc:FBgn0039169]
FBgn0039509	bigmax	3R	22388089	22389446	-	n.s.
FBgn0040305	MTF-1	3L	9227595	9235878	+	female-specific	Metal response element-binding Transcription Factor-1 [Source:FlyBase;Acc:FBgn0040305]
FBgn0043364	cbt	2L	447746	451141	-	concordant	cabut [Source:FlyBase;Acc:FBgn0043364]
FBgn0045759	bin	3L	6898806	6902237	+	n.s.	biniou [Source:FlyBase;Acc:FBgn0045759]
FBgn0260632	dl	2L	16763713	16777313	-	male-specific	dorsal [Source:FlyBase;Acc:FBgn0260632]
FBgn0260943	Rbp6	3L	16633277	16804045	-	female-specific	RNA-binding protein 6 [Source:FlyBase;Acc:FBgn0260943]
FBgn0261283	SREBP	3L	3046727	3051846	-	female-specific	Sterol regulatory element binding protein [Source:FlyBase;Acc:FBgn0261283]
FBgn0261793	Trf2	X	7791755	7795697	+	n.s.	TATA box binding protein-related factor 2 [Source:FlyBase;Acc:FBgn0261793]
FBgn0262477	FoxP	3R	15364684	15369774	+	male-specific	Forkhead box P [Source:FlyBase;Acc:FBgn0262477]
FBgn0263108	BtbVII	3L	2991713	3001442	+	n.s.	BTB-protein-VII [Source:FlyBase;Acc:FBgn0263108]
FBgn0264001	bru3	3L	13230364	13350145	-	n.s.	bruno 3 [Source:FlyBase;Acc:FBgn0264001]
FBgn0265182	CG44247	2R	18643177	18647791	+	female-specific
FBgn0265193	Atf-2	2R	18636406	18638041	+	male-specific	Activating transcription factor-2 [Source:FlyBase;Acc:FBgn0265193]
FBgn0265276	l(3)neo38	3R	13380697	13396058	+	female-specific	lethal (3) neo38 [Source:FlyBase;Acc:FBgn0265276]
FBgn0265784	CrebB	X	17227048	17238502	+	n.s.	Cyclic-AMP response element binding protein B [Source:FlyBase;Acc:FBgn0265784]
male-biased
FBgn0001138	grn	3R	16847624	16878042	+	n.s.	grain [Source:FlyBase;Acc:FBgn0001138]
FBgn0001994	crp	2L	15621987	15645009	-	male-specific	cropped [Source:FlyBase;Acc:FBgn0001994]
FBgn0003117	pnr	3R	9274202	9288229	-	n.s.	pannier [Source:FlyBase;Acc:FBgn0003117]
FBgn0003507	srp	3R	9310583	9320470	-	male-specific	serpent [Source:FlyBase;Acc:FBgn0003507]
FBgn0032223	GATAd	2L	10003367	10008613	+	n.s.
FBgn0038391	GATAe	3R	9295519	9303021	-	concordant
FBgn0283521	lola	2R	4720496	4780683	-	n.s.	longitudinals lacking [Source:FlyBase;Acc:FBgn0283521]

## Sheet: TFs regulating evolution
Gene ID	Gene Name	Chr	start	end	strand	evolutionary pattern	Regulating sex-biased expression?	description
female-specific evolution
FBgn0000014	abd-A	3R	8491834	8515240	+	n.s.		abdominal A [Source:FlyBase;Acc:FBgn0000014]
FBgn0000015	Abd-B	3R	8379203	8396065	+	female-specific		Abdominal B [Source:FlyBase;Acc:FBgn0000015]
FBgn0000097	aop	2L	2038952	2062100	-	n.s.		anterior open [Source:FlyBase;Acc:FBgn0000097]
FBgn0000157	Dll	2R	18581617	18601580	+	n.s.		Distal-less [Source:FlyBase;Acc:FBgn0000157]
FBgn0000439	Dfd	3R	2478914	2488490	+	n.s.		Deformed [Source:FlyBase;Acc:FBgn0000439]
FBgn0000576	ems	3R	11336655	11339353	-	n.s.		empty spiracles [Source:FlyBase;Acc:FBgn0000576]
FBgn0000577	en	2R	5691928	5695119	-	n.s.		engrailed [Source:FlyBase;Acc:FBgn0000577]
FBgn0000659	fkh	3R	23616325	23620542	-	n.s.	yes	fork head [Source:FlyBase;Acc:FBgn0000659]
FBgn0001150	gt	X	2127703	2131411	-	concordant	yes	giant [Source:FlyBase;Acc:FBgn0001150]
FBgn0001269	inv	2R	5643423	5674580	+	n.s.		invected [Source:FlyBase;Acc:FBgn0001269]
FBgn0001291	Jra	2R	4343846	4344961	+	n.s.	yes	Jun-related antigen [Source:FlyBase;Acc:FBgn0001291]
FBgn0001297	kay	3R	24776212	24802861	+	n.s.	yes	kayak [Source:FlyBase;Acc:FBgn0001297]
FBgn0002023	Lim3	2L	18372932	18399608	-	n.s.
FBgn0002522	lab	3R	2349549	2366541	-	male-specific		labial [Source:FlyBase;Acc:FBgn0002522]
FBgn0002922	nau	3R	18917291	18922944	-	n.s.		nautilus [Source:FlyBase;Acc:FBgn0002922]
FBgn0002941	slou	3R	3864414	3872496	+	male-specific		slouch [Source:FlyBase;Acc:FBgn0002941]
FBgn0003002	opa	3R	613536	629764	+	n.s.		odd paired [Source:FlyBase;Acc:FBgn0003002]
FBgn0003117	pnr	3R	9274202	9288229	-	n.s.	yes	pannier [Source:FlyBase;Acc:FBgn0003117]
FBgn0003118	pnt	3R	18494711	18543393	-	n.s.		pointed [Source:FlyBase;Acc:FBgn0003118]
FBgn0003339	Scr	3R	2509100	2528165	-	n.s.		Sex combs reduced [Source:FlyBase;Acc:FBgn0003339]
FBgn0003430	slp1	2L	3665027	3666441	+	n.s.	yes	sloppy paired 1 [Source:FlyBase;Acc:FBgn0003430]
FBgn0003513	ss	3R	8914275	8940607	+	n.s.		spineless [Source:FlyBase;Acc:FBgn0003513]
FBgn0004396	CrebA	3L	15161312	15179472	+	female-specific	yes	Cyclic-AMP response element binding protein A [Source:FlyBase;Acc:FBgn0004396]
FBgn0004510	Ets97D	3R	22030157	22032265	-	female-specific		Ets at 97D [Source:FlyBase;Acc:FBgn0004510]
FBgn0004567	slp2	2L	3676548	3677903	+	n.s.	yes	sloppy paired 2 [Source:FlyBase;Acc:FBgn0004567]
FBgn0004607	zfh2	4	418997	453762	+	n.s.		Zn finger homeodomain 2 [Source:FlyBase;Acc:FBgn0004607]
FBgn0005612	Sox14	2R	17786835	17793202	+	female-specific		Sox box protein 14 [Source:FlyBase;Acc:FBgn0005612]
FBgn0005658	Ets65A	3L	6059690	6080993	+	n.s.		Ets at 65A [Source:FlyBase;Acc:FBgn0005658]
FBgn0005660	Ets21C	2L	517894	522853	-	n.s.		Ets at 21C [Source:FlyBase;Acc:FBgn0005660]
FBgn0008646	E5	3R	11366034	11373681	+	n.s.
FBgn0008651	lbl	3R	3987828	4012002	+	n.s.		ladybird late [Source:FlyBase;Acc:FBgn0008651]
FBgn0011236	ken	2R	17685715	17692898	+	female-specific		ken and barbie [Source:FlyBase;Acc:FBgn0011236]
FBgn0013751	Awh	3L	3894123	3897191	+	n.s.		Arrowhead [Source:FlyBase;Acc:FBgn0013751]
FBgn0015524	otp	2R	14749028	14767436	-	female-specific		orthopedia [Source:FlyBase;Acc:FBgn0015524]
FBgn0015561	unpg	2R	3471293	3475931	+	n.s.		unplugged [Source:FlyBase;Acc:FBgn0015561]
FBgn0015602	BEAF-32	2R	8842366	8844525	+	female-specific	yes	Boundary element-associated factor of 32kD [Source:FlyBase;Acc:FBgn0015602]
FBgn0015664	Dref	2L	9653733	9656833	-	concordant	yes	DNA replication-related element factor [Source:FlyBase;Acc:FBgn0015664]
FBgn0016076	vri	2L	5119111	5124493	+	n.s.	yes	vrille [Source:FlyBase;Acc:FBgn0016076]
FBgn0016694	Pdp1	3L	7682336	7737147	-	female-specific	yes	PAR-domain protein 1 [Source:FlyBase;Acc:FBgn0016694]
FBgn0017578	Max	3L	18746634	18748257	-	n.s.
FBgn0020617	Rx	2R	14782432	14801650	+	n.s.		Retinal Homeobox [Source:FlyBase;Acc:FBgn0020617]
FBgn0021872	Xbp1	2R	15007270	15009552	+	female-specific		X box binding protein-1 [Source:FlyBase;Acc:FBgn0021872]
FBgn0023076	Clk	3L	7640479	7647462	-	female-specific	yes	Clock [Source:FlyBase;Acc:FBgn0023076]
FBgn0023489	Pph13	2L	548546	550703	+	female-specific		PvuII-PstI homology 13 [Source:FlyBase;Acc:FBgn0023489]
FBgn0024184	unc-4	X	16646165	16656634	+	n.s.
FBgn0024371	E2f2	2L	20228788	20230746	-	female-specific	yes	E2F transcription factor 2 [Source:FlyBase;Acc:FBgn0024371]
FBgn0025360	Optix	2R	2335538	2347207	+	n.s.
FBgn0027599	CG2790	2R	18713386	18715734	-	n.s.
FBgn0028550	Atf3	X	1021942	1054564	-	n.s.	yes	Activating transcription factor 3 [Source:FlyBase;Acc:FBgn0028550]
FBgn0028996	onecut	4	504884	513578	-	male-specific
FBgn0032202	REPTOR-BP	2L	9933534	9934536	+	n.s.	yes	REPTOR-binding partner [Source:FlyBase;Acc:FBgn0032202]
FBgn0032707	CG10348	2L	18009808	18011415	-	female-specific
FBgn0034599	hng1	2R	15030105	15031391	+	concordant		hinge1 [Source:FlyBase;Acc:FBgn0034599]
FBgn0034946	CG3065	2R	17778306	17780179	+	female-specific
FBgn0035625	Blimp-1	3L	5590285	5611295	+	n.s.	yes
FBgn0036274	CG4328	3L	11998689	12003450	-	n.s.
FBgn0036522	CG7372	3L	15242912	15245899	+	n.s.
FBgn0037659	Kdm2	3R	16011239	16021941	-	n.s.		Lysine (K)-specific demethylase 2 [Source:FlyBase;Acc:FBgn0037659]
FBgn0037672	sage	3R	15810044	15812337	+	n.s.		salivary gland-expressed bHLH [Source:FlyBase;Acc:FBgn0037672]
FBgn0038047	CG5245	3R	12744468	12745973	-	n.s.
FBgn0038197	foxo	3R	11158673	11189376	-	female-specific	yes	forkhead box sub-group O [Source:FlyBase;Acc:FBgn0038197]
FBgn0038592	CG18599	3R	7082740	7084926	-	female-specific
FBgn0039225	Ets96B	3R	19967012	19971321	+	n.s.	yes
FBgn0039283	danr	3R	20308101	20309988	+	n.s.		distal antenna-related [Source:FlyBase;Acc:FBgn0039283]
FBgn0041092	tai	2L	8873901	8949556	+	n.s.		taiman [Source:FlyBase;Acc:FBgn0041092]
FBgn0045759	bin	3L	6898806	6902237	+	n.s.	yes	biniou [Source:FlyBase;Acc:FBgn0045759]
FBgn0045852	ham	2L	18058200	18082039	-	n.s.		hamlet [Source:FlyBase;Acc:FBgn0045852]
FBgn0051481	pb	3R	2396402	2426246	-	n.s.		proboscipedia [Source:FlyBase;Acc:FBgn0051481]
FBgn0052105	Lmx1a	3L	12037311	12043315	+	n.s.		LIM homeobox transcription factor 1 alpha [Source:FlyBase;Acc:FBgn0052105]
FBgn0262477	FoxP	3R	15364684	15369774	+	male-specific	yes	Forkhead box P [Source:FlyBase;Acc:FBgn0262477]
FBgn0262656	Myc	X	3009994	3025843	+	n.s.
FBgn0263239	dar1	3L	3664275	3689757	+	male-specific		dendritic arbor reduction 1 [Source:FlyBase;Acc:FBgn0263239]
FBgn0263512	Vsx2	X	5009959	5040245	-	n.s.		Visual system homeobox 2 [Source:FlyBase;Acc:FBgn0263512]
FBgn0264075	tgo	3R	16054516	16056447	+	n.s.		tango [Source:FlyBase;Acc:FBgn0264075]
FBgn0265182	CG44247	2R	18643177	18647791	+	female-specific	yes
FBgn0265193	Atf-2	2R	18636406	18638041	+	male-specific	yes	Activating transcription factor-2 [Source:FlyBase;Acc:FBgn0265193]
FBgn0265784	CrebB	X	17227048	17238502	+	n.s.	yes	Cyclic-AMP response element binding protein B [Source:FlyBase;Acc:FBgn0265784]
FBgn0267821	da	2L	10060020	10062161	+	female-specific		daughterless [Source:FlyBase;Acc:FBgn0267821]
FBgn0267978	ap	2R	307332	328228	-	concordant		apterous [Source:FlyBase;Acc:FBgn0267978]
male-specific evolution
FBgn0000015	Abd-B	3R	8379203	8396065	+	female-specific		Abdominal B [Source:FlyBase;Acc:FBgn0000015]
FBgn0000286	Cf2	2L	4706416	4712345	-	n.s.		Chorion factor 2 [Source:FlyBase;Acc:FBgn0000286]
FBgn0000370	crc	2L	20388889	20397368	+	female-specific	yes	cryptocephal [Source:FlyBase;Acc:FBgn0000370]
FBgn0000546	EcR	2R	684647	755570	-	male-specific		Ecdysone receptor [Source:FlyBase;Acc:FBgn0000546]
FBgn0000659	fkh	3R	23616325	23620542	-	n.s.	yes	fork head [Source:FlyBase;Acc:FBgn0000659]
FBgn0001078	ftz-f1	3L	18247397	18290467	-	n.s.		ftz transcription factor 1 [Source:FlyBase;Acc:FBgn0001078]
FBgn0001138	grn	3R	16847624	16878042	+	n.s.	yes	grain [Source:FlyBase;Acc:FBgn0001138]
FBgn0001150	gt	X	2127703	2131411	-	concordant	yes	giant [Source:FlyBase;Acc:FBgn0001150]
FBgn0001291	Jra	2R	4343846	4344961	+	n.s.	yes	Jun-related antigen [Source:FlyBase;Acc:FBgn0001291]
FBgn0001297	kay	3R	24776212	24802861	+	n.s.	yes	kayak [Source:FlyBase;Acc:FBgn0001297]
FBgn0002723	Met	X	10831752	10837062	+	female-specific		Methoprene-tolerant [Source:FlyBase;Acc:FBgn0002723]
FBgn0002783	mor	3R	9341730	9346688	+	n.s.		moira [Source:FlyBase;Acc:FBgn0002783]
FBgn0002922	nau	3R	18917291	18922944	-	n.s.		nautilus [Source:FlyBase;Acc:FBgn0002922]
FBgn0002985	odd	2L	3450512	3452753	-	n.s.		odd skipped [Source:FlyBase;Acc:FBgn0002985]
FBgn0003028	ovo	X	4552321	4573751	+	concordant
FBgn0003117	pnr	3R	9274202	9288229	-	n.s.	yes	pannier [Source:FlyBase;Acc:FBgn0003117]
FBgn0003118	pnt	3R	18494711	18543393	-	n.s.		pointed [Source:FlyBase;Acc:FBgn0003118]
FBgn0003277	RpII215	X	10792062	10799767	-	n.s.		RNA polymerase II 215kD subunit [Source:FlyBase;Acc:FBgn0003277]
FBgn0003430	slp1	2L	3665027	3666441	+	n.s.	yes	sloppy paired 1 [Source:FlyBase;Acc:FBgn0003430]
FBgn0003499	sr	3R	7218824	7258848	-	concordant	yes	stripe [Source:FlyBase;Acc:FBgn0003499]
FBgn0003507	srp	3R	9310583	9320470	-	male-specific	yes	serpent [Source:FlyBase;Acc:FBgn0003507]
FBgn0003651	svp	3R	12869524	12890983	-	female-specific		seven up [Source:FlyBase;Acc:FBgn0003651]
FBgn0003687	Tbp	2R	15547369	15548780	-	female-specific	yes	TATA binding protein [Source:FlyBase;Acc:FBgn0003687]
FBgn0003742	tra2	2R	8672546	8674855	-	female-specific	yes	transformer 2 [Source:FlyBase;Acc:FBgn0003742]
FBgn0003870	ttk	3R	26635279	26657039	+	n.s.		tramtrack [Source:FlyBase;Acc:FBgn0003870]
FBgn0003964	usp	X	1765976	1769366	-	n.s.		ultraspiracle [Source:FlyBase;Acc:FBgn0003964]
FBgn0004396	CrebA	3L	15161312	15179472	+	female-specific	yes	Cyclic-AMP response element binding protein A [Source:FlyBase;Acc:FBgn0004396]
FBgn0004880	scrt	3L	4017910	4026957	+	male-specific		scratch [Source:FlyBase;Acc:FBgn0004880]
FBgn0004892	sob	2L	3424283	3427042	-	female-specific		sister of odd and bowl [Source:FlyBase;Acc:FBgn0004892]
FBgn0004893	bowl	2L	3612034	3624374	+	n.s.		brother of odd with entrails limited [Source:FlyBase;Acc:FBgn0004893]
FBgn0004914	Hnf4	2L	8410124	8432781	-	antagonistic	yes	Hepatocyte nuclear factor 4 [Source:FlyBase;Acc:FBgn0004914]
FBgn0005558	ey	4	604566	620767	+	n.s.		eyeless [Source:FlyBase;Acc:FBgn0005558]
FBgn0005561	sv	4	969028	987499	+	male-specific		shaven [Source:FlyBase;Acc:FBgn0005561]
FBgn0005659	Ets98B	3R	22814013	22825859	+	concordant		Ets at 98B [Source:FlyBase;Acc:FBgn0005659]
FBgn0010287	Trf	2L	7810849	7812111	+	female-specific	yes	TBP-related factor [Source:FlyBase;Acc:FBgn0010287]
FBgn0010355	Taf1	3R	2335216	2344514	+	male-specific		TBP-associated factor 1 [Source:FlyBase;Acc:FBgn0010355]
FBgn0011655	Med	3R	26537898	26542165	+	female-specific		Medea [Source:FlyBase;Acc:FBgn0011655]
FBgn0011656	Mef2	2R	4163697	4206625	-	n.s.		Myocyte enhancer factor 2 [Source:FlyBase;Acc:FBgn0011656]
FBgn0011763	Dp	2R	7342852	7348761	+	male-specific	yes	DP transcription factor [Source:FlyBase;Acc:FBgn0011763]
FBgn0013469	klu	3L	10747254	10749701	-	male-specific	yes	klumpfuss [Source:FlyBase;Acc:FBgn0013469]
FBgn0014859	Hr38	2L	19794352	19820255	-	male-specific		Hormone receptor-like in 38 [Source:FlyBase;Acc:FBgn0014859]
FBgn0015239	Hr78	3L	20630534	20633777	-	concordant		Hormone-receptor-like in 78 [Source:FlyBase;Acc:FBgn0015239]
FBgn0015615	SMC3	X	15477139	15481973	-	female-specific		Structural maintenance of chromosomes 3 [Source:FlyBase;Acc:FBgn0015615]
FBgn0016076	vri	2L	5119111	5124493	+	n.s.	yes	vrille [Source:FlyBase;Acc:FBgn0016076]
FBgn0016694	Pdp1	3L	7682336	7737147	-	female-specific	yes	PAR-domain protein 1 [Source:FlyBase;Acc:FBgn0016694]
FBgn0017578	Max	3L	18746634	18748257	-	n.s.
FBgn0020378	Sp1	X	9058725	9084906	+	n.s.
FBgn0021767	org-1	X	7814036	7819889	-	n.s.		optomotor-blind-related-gene-1 [Source:FlyBase;Acc:FBgn0021767]
FBgn0021872	Xbp1	2R	15007270	15009552	+	female-specific		X box binding protein-1 [Source:FlyBase;Acc:FBgn0021872]
FBgn0023076	Clk	3L	7640479	7647462	-	female-specific	yes	Clock [Source:FlyBase;Acc:FBgn0023076]
FBgn0024371	E2f2	2L	20228788	20230746	-	female-specific	yes	E2F transcription factor 2 [Source:FlyBase;Acc:FBgn0024371]
FBgn0025360	Optix	2R	2335538	2347207	+	n.s.
FBgn0025455	CycT	3L	17113396	17120162	-	male-specific		Cyclin T [Source:FlyBase;Acc:FBgn0025455]
FBgn0025635	CG17829	X	428876	431278	+	n.s.
FBgn0027364	Six4	3L	19969407	19973478	-	female-specific
FBgn0028550	Atf3	X	1021942	1054564	-	n.s.	yes	Activating transcription factor 3 [Source:FlyBase;Acc:FBgn0028550]
FBgn0028991	seq	2R	7300739	7305804	-	n.s.		sequoia [Source:FlyBase;Acc:FBgn0028991]
FBgn0029711	Usf	X	4085620	4089185	-	female-specific	yes
FBgn0029957	CG12155	X	7114965	7116928	+	n.s.
FBgn0030505	NFAT	X	12768673	12808142	+	n.s.		NFAT nuclear factor [Source:FlyBase;Acc:FBgn0030505]
FBgn0032209	Hand	2L	9962139	9965097	-	concordant
FBgn0032223	GATAd	2L	10003367	10008613	+	n.s.	yes
FBgn0032816	Nf-YB	2L	18975574	18976836	+	n.s.		Nuclear factor Y-box B [Source:FlyBase;Acc:FBgn0032816]
FBgn0034946	CG3065	2R	17778306	17780179	+	female-specific
FBgn0034985	CG3328	2R	17961949	17973094	+	female-specific
FBgn0035144	Kah	3L	534796	541224	-	male-specific		Kahuli [Source:FlyBase;Acc:FBgn0035144]
FBgn0035481	CG12605	3L	3987492	3997979	-	male-specific
FBgn0035769	CTCF	3L	7260731	7264050	-	concordant
FBgn0035849	ERR	3L	8032643	8036120	-	n.s.		estrogen-related receptor [Source:FlyBase;Acc:FBgn0035849]
FBgn0036522	CG7372	3L	15242912	15245899	+	n.s.
FBgn0037698	CG16779	3R	15612834	15624558	+	male-specific
FBgn0037802	Sirt6	3R	14865397	14866700	+	female-specific		Sirtuin 6 [Source:FlyBase;Acc:FBgn0037802]
FBgn0038047	CG5245	3R	12744468	12745973	-	n.s.
FBgn0038197	foxo	3R	11158673	11189376	-	female-specific	yes	forkhead box sub-group O [Source:FlyBase;Acc:FBgn0038197]
FBgn0038391	GATAe	3R	9295519	9303021	-	concordant	yes
FBgn0038805	TFAM	3R	4834774	4836568	+	female-specific		mitochondrial transcription factor A [Source:FlyBase;Acc:FBgn0038805]
FBgn0039169	Spps	3R	19404096	19407745	-	n.s.	yes	Sp1-like factor for pairing sensitive-silencing [Source:FlyBase;Acc:FBgn0039169]
FBgn0039225	Ets96B	3R	19967012	19971321	+	n.s.
FBgn0040305	MTF-1	3L	9227595	9235878	+	female-specific	yes	Metal response element-binding Transcription Factor-1 [Source:FlyBase;Acc:FBgn0040305]
FBgn0043002	Chrac-14	2L	8175331	8176070	+	female-specific		Chromatin accessibility complex 14kD protein [Source:FlyBase;Acc:FBgn0043002]
FBgn0043364	cbt	2L	447746	451141	-	concordant	yes	cabut [Source:FlyBase;Acc:FBgn0043364]
FBgn0051716	Cnot4	2L	10066684	10073228	+	n.s.		CCR4-NOT transcription complex subunit 4 [Source:FlyBase;Acc:FBgn0051716]
FBgn0085424	nub	2L	12188818	12222704	+	female-specific		nubbin [Source:FlyBase;Acc:FBgn0085424]
FBgn0259211	grh	2R	11799784	11840256	+	n.s.		grainy head [Source:FlyBase;Acc:FBgn0259211]
FBgn0260012	pds5	2R	6193668	6199440	+	female-specific		precocious dissociation of sisters 5 [Source:FlyBase;Acc:FBgn0260012]
FBgn0261793	Trf2	X	7791755	7795697	+	n.s.	yes	TATA box binding protein-related factor 2 [Source:FlyBase;Acc:FBgn0261793]
FBgn0261953	TfAP-2	3L	20722818	20750032	+	n.s.		Transcription factor AP-2 [Source:FlyBase;Acc:FBgn0261953]
FBgn0262656	Myc	X	3009994	3025843	+	n.s.
FBgn0262975	cnc	3R	18387281	18428092	-	female-specific		cap-n-collar [Source:FlyBase;Acc:FBgn0262975]
FBgn0263108	BtbVII	3L	2991713	3001442	+	n.s.	yes	BTB-protein-VII [Source:FlyBase;Acc:FBgn0263108]
FBgn0263112	Mitf	4	1061154	1067776	+	n.s.
FBgn0263239	dar1	3L	3664275	3689757	+	male-specific		dendritic arbor reduction 1 [Source:FlyBase;Acc:FBgn0263239]
FBgn0265182	CG44247	2R	18643177	18647791	+	female-specific	yes
FBgn0265193	Atf-2	2R	18636406	18638041	+	male-specific	yes	Activating transcription factor-2 [Source:FlyBase;Acc:FBgn0265193]
FBgn0265276	l(3)neo38	3R	13380697	13396058	+	female-specific	yes	lethal (3) neo38 [Source:FlyBase;Acc:FBgn0265276]
FBgn0265784	CrebB	X	17227048	17238502	+	n.s.	yes	Cyclic-AMP response element binding protein B [Source:FlyBase;Acc:FBgn0265784]
FBgn0283451	br	X	1374363	1419472	+	female-specific		broad [Source:FlyBase;Acc:FBgn0283451]
antagonistic evolution
FBgn0000014	abd-A	3R	8491834	8515240	+	n.s.		abdominal A [Source:FlyBase;Acc:FBgn0000014]
FBgn0000015	Abd-B	3R	8379203	8396065	+	female-specific		Abdominal B [Source:FlyBase;Acc:FBgn0000015]
FBgn0000097	aop	2L	2038952	2062100	-	n.s.		anterior open [Source:FlyBase;Acc:FBgn0000097]
FBgn0000251	cad	2L	19869379	19881691	+	n.s.		caudal [Source:FlyBase;Acc:FBgn0000251]
FBgn0000286	Cf2	2L	4706416	4712345	-	n.s.		Chorion factor 2 [Source:FlyBase;Acc:FBgn0000286]
FBgn0000289	cg	2R	8262639	8271598	+	male-specific		combgap [Source:FlyBase;Acc:FBgn0000289]
FBgn0000370	crc	2L	20388889	20397368	+	female-specific	yes	cryptocephal [Source:FlyBase;Acc:FBgn0000370]
FBgn0000439	Dfd	3R	2478914	2488490	+	n.s.		Deformed [Source:FlyBase;Acc:FBgn0000439]
FBgn0000492	Dr	3R	24570524	24579327	+	male-specific		Drop [Source:FlyBase;Acc:FBgn0000492]
FBgn0000565	Eip71CD	3L	15136886	15139001	+	n.s.		Ecdysone-induced protein 28/29kD [Source:FlyBase;Acc:FBgn0000565]
FBgn0000567	Eip74EF	3L	17122657	17181769	-	concordant		Ecdysone-induced protein 74EF [Source:FlyBase;Acc:FBgn0000567]
FBgn0000577	en	2R	5691928	5695119	-	n.s.		engrailed [Source:FlyBase;Acc:FBgn0000577]
FBgn0000611	exd	X	14953245	14957365	+	n.s.		extradenticle [Source:FlyBase;Acc:FBgn0000611]
FBgn0000659	fkh	3R	23616325	23620542	-	n.s.	yes	fork head [Source:FlyBase;Acc:FBgn0000659]
FBgn0001078	ftz-f1	3L	18247397	18290467	-	n.s.		ftz transcription factor 1 [Source:FlyBase;Acc:FBgn0001078]
FBgn0001138	grn	3R	16847624	16878042	+	n.s.	yes	grain [Source:FlyBase;Acc:FBgn0001138]
FBgn0001168	h	3L	8502122	8505613	+	female-specific		hairy [Source:FlyBase;Acc:FBgn0001168]
FBgn0001222	Hsf	2R	12118322	12123015	-	n.s.		Heat shock factor [Source:FlyBase;Acc:FBgn0001222]
FBgn0001235	hth	3R	14524088	14626238	+	female-specific		homothorax [Source:FlyBase;Acc:FBgn0001235]
FBgn0001269	inv	2R	5643423	5674580	+	n.s.		invected [Source:FlyBase;Acc:FBgn0001269]
FBgn0001291	Jra	2R	4343846	4344961	+	n.s.	yes	Jun-related antigen [Source:FlyBase;Acc:FBgn0001291]
FBgn0001297	kay	3R	24776212	24802861	+	n.s.	yes	kayak [Source:FlyBase;Acc:FBgn0001297]
FBgn0001981	esg	2L	14827678	14829952	+	female-specific		escargot [Source:FlyBase;Acc:FBgn0001981]
FBgn0001994	crp	2L	15621987	15645009	-	male-specific	yes	cropped [Source:FlyBase;Acc:FBgn0001994]
FBgn0002023	Lim3	2L	18372932	18399608	-	n.s.
FBgn0002573	sens	3L	13094794	13098847	-	n.s.		senseless [Source:FlyBase;Acc:FBgn0002573]
FBgn0002609	E(spl)m3-HLH	3R	21178307	21179711	+	n.s.		Enhancer of split m3 helix-loop-helix [Source:FlyBase;Acc:FBgn0002609]
FBgn0002733	E(spl)mbeta-HLH	3R	21161491	21162469	-	n.s.		Enhancer of split mbeta helix-loop-helix [Source:FlyBase;Acc:FBgn0002733]
FBgn0002914	Myb	X	14813444	14816477	-	concordant		Myb oncogene-like [Source:FlyBase;Acc:FBgn0002914]
FBgn0002922	nau	3R	18917291	18922944	-	n.s.		nautilus [Source:FlyBase;Acc:FBgn0002922]
FBgn0003002	opa	3R	613536	629764	+	n.s.		odd paired [Source:FlyBase;Acc:FBgn0003002]
FBgn0003117	pnr	3R	9274202	9288229	-	n.s.	yes	pannier [Source:FlyBase;Acc:FBgn0003117]
FBgn0003118	pnt	3R	18494711	18543393	-	n.s.		pointed [Source:FlyBase;Acc:FBgn0003118]
FBgn0003345	sd	X	14768202	14790706	+	female-specific	yes	scalloped [Source:FlyBase;Acc:FBgn0003345]
FBgn0003499	sr	3R	7218824	7258848	-	concordant	yes	stripe [Source:FlyBase;Acc:FBgn0003499]
FBgn0003507	srp	3R	9310583	9320470	-	male-specific	yes	serpent [Source:FlyBase;Acc:FBgn0003507]
FBgn0003511	Sry-beta	3R	25039499	25040693	+	female-specific		Serendipity beta [Source:FlyBase;Acc:FBgn0003511]
FBgn0003512	Sry-delta	3R	25043087	25044710	+	antagonistic		Serendipity delta [Source:FlyBase;Acc:FBgn0003512]
FBgn0003651	svp	3R	12869524	12890983	-	female-specific		seven up [Source:FlyBase;Acc:FBgn0003651]
FBgn0003964	usp	X	1765976	1769366	-	n.s.		ultraspiracle [Source:FlyBase;Acc:FBgn0003964]
FBgn0004101	bs	2R	18132251	18157400	+	female-specific	yes	blistered [Source:FlyBase;Acc:FBgn0004101]
FBgn0004396	CrebA	3L	15161312	15179472	+	female-specific	yes	Cyclic-AMP response element binding protein A [Source:FlyBase;Acc:FBgn0004396]
FBgn0004510	Ets97D	3R	22030157	22032265	-	female-specific		Ets at 97D [Source:FlyBase;Acc:FBgn0004510]
FBgn0004606	zfh1	3R	25726775	25750178	+	n.s.		Zn finger homeodomain 1 [Source:FlyBase;Acc:FBgn0004606]
FBgn0004607	zfh2	4	418997	453762	+	n.s.		Zn finger homeodomain 2 [Source:FlyBase;Acc:FBgn0004607]
FBgn0004859	ci	4	15094	23531	-	female-specific		cubitus interruptus [Source:FlyBase;Acc:FBgn0004859]
FBgn0004914	Hnf4	2L	8410124	8432781	-	antagonistic	yes	Hepatocyte nuclear factor 4 [Source:FlyBase;Acc:FBgn0004914]
FBgn0005427	ewg	X	99232	110500	-	female-specific		erect wing [Source:FlyBase;Acc:FBgn0005427]
FBgn0005658	Ets65A	3L	6059690	6080993	+	n.s.		Ets at 65A [Source:FlyBase;Acc:FBgn0005658]
FBgn0005659	Ets98B	3R	22814013	22825859	+	concordant		Ets at 98B [Source:FlyBase;Acc:FBgn0005659]
FBgn0005660	Ets21C	2L	517894	522853	-	n.s.		Ets at 21C [Source:FlyBase;Acc:FBgn0005660]
FBgn0011656	Mef2	2R	4163697	4206625	-	n.s.		Myocyte enhancer factor 2 [Source:FlyBase;Acc:FBgn0011656]
FBgn0011701	repo	3R	7114563	7118077	-	female-specific		reversed polarity [Source:FlyBase;Acc:FBgn0011701]
FBgn0011723	byn	3L	11640941	11649114	+	female-specific		brachyenteron [Source:FlyBase;Acc:FBgn0011723]
FBgn0011766	E2f1	3R	3762576	3802998	+	female-specific	yes	E2F transcription factor 1 [Source:FlyBase;Acc:FBgn0011766]
FBgn0013469	klu	3L	10747254	10749701	-	male-specific	yes	klumpfuss [Source:FlyBase;Acc:FBgn0013469]
FBgn0013751	Awh	3L	3894123	3897191	+	n.s.		Arrowhead [Source:FlyBase;Acc:FBgn0013751]
FBgn0014859	Hr38	2L	19794352	19820255	-	male-specific		Hormone receptor-like in 38 [Source:FlyBase;Acc:FBgn0014859]
FBgn0015239	Hr78	3L	20630534	20633777	-	concordant		Hormone-receptor-like in 78 [Source:FlyBase;Acc:FBgn0015239]
FBgn0015524	otp	2R	14749028	14767436	-	female-specific		orthopedia [Source:FlyBase;Acc:FBgn0015524]
FBgn0015561	unpg	2R	3471293	3475931	+	n.s.		unplugged [Source:FlyBase;Acc:FBgn0015561]
FBgn0017578	Max	3L	18746634	18748257	-	n.s.
FBgn0020617	Rx	2R	14782432	14801650	+	n.s.		Retinal Homeobox [Source:FlyBase;Acc:FBgn0020617]
FBgn0020655	ArfGAP1	3L	12123764	12126278	-	female-specific		ADP-ribosylation factor GTPase activating protein 1 [Source:FlyBase;Acc:FBgn0020655]
FBgn0021767	org-1	X	7814036	7819889	-	n.s.		optomotor-blind-related-gene-1 [Source:FlyBase;Acc:FBgn0021767]
FBgn0021872	Xbp1	2R	15007270	15009552	+	female-specific		X box binding protein-1 [Source:FlyBase;Acc:FBgn0021872]
FBgn0022959	yps	3L	11828805	11832764	-	female-specific		ypsilon schachtel [Source:FlyBase;Acc:FBgn0022959]
FBgn0023076	Clk	3L	7640479	7647462	-	female-specific	yes	Clock [Source:FlyBase;Acc:FBgn0023076]
FBgn0024184	unc-4	X	16646165	16656634	+	n.s.
FBgn0025635	CG17829	X	428876	431278	+	n.s.
FBgn0025800	Smox	X	7509984	7511444	-	n.s.		Smad on X [Source:FlyBase;Acc:FBgn0025800]
FBgn0027339	jim	3L	21850701	21880823	-	female-specific
FBgn0028550	Atf3	X	1021942	1054564	-	n.s.	yes	Activating transcription factor 3 [Source:FlyBase;Acc:FBgn0028550]
FBgn0028690	Rpn5	3R	1508663	1511009	+	male-specific		Regulatory particle non-ATPase 5 [Source:FlyBase;Acc:FBgn0028690]
FBgn0029711	Usf	X	4085620	4089185	-	female-specific	yes
FBgn0029905	Nf-YC	X	6234366	6237116	-	n.s.		Nuclear factor Y-box C [Source:FlyBase;Acc:FBgn0029905]
FBgn0029939	CG9650	X	6588866	6631112	+	female-specific
FBgn0030005	CG2120	X	7503045	7507871	+	n.s.
FBgn0030120	CG17440	X	8605971	8610035	-	female-specific
FBgn0030945	Ing3	X	17504233	17506805	-	female-specific		Inhibitor of growth family member 3 [Source:FlyBase;Acc:FBgn0030945]
FBgn0032202	REPTOR-BP	2L	9933534	9934536	+	n.s.	yes	REPTOR-binding partner [Source:FlyBase;Acc:FBgn0032202]
FBgn0032223	GATAd	2L	10003367	10008613	+	n.s.	yes
FBgn0032651	Oli	2L	16915532	16917612	+	female-specific		Olig family [Source:FlyBase;Acc:FBgn0032651]
FBgn0032707	CG10348	2L	18009808	18011415	-	female-specific
FBgn0032741	Sidpn	2L	18321493	18324571	+	concordant		similar to Deadpan [Source:FlyBase;Acc:FBgn0032741]
FBgn0032816	Nf-YB	2L	18975574	18976836	+	n.s.		Nuclear factor Y-box B [Source:FlyBase;Acc:FBgn0032816]
FBgn0033782	sug	2R	7058909	7060792	+	n.s.		sugarbabe [Source:FlyBase;Acc:FBgn0033782]
FBgn0034534	maf-S	2R	14518939	14519399	+	concordant
FBgn0035625	Blimp-1	3L	5590285	5611295	+	n.s.	yes
FBgn0035769	CTCF	3L	7260731	7264050	-	concordant
FBgn0035849	ERR	3L	8032643	8036120	-	n.s.		estrogen-related receptor [Source:FlyBase;Acc:FBgn0035849]
FBgn0035993	Nf-YA	3L	9237942	9239132	-	female-specific		Nuclear factor Y-box A [Source:FlyBase;Acc:FBgn0035993]
FBgn0036124	CG7839	3L	10839747	10843706	+	n.s.
FBgn0037248	srl	3R	234121	241521	-	n.s.		spargel [Source:FlyBase;Acc:FBgn0037248]
FBgn0037475	Fer1	3R	2821513	2826492	+	male-specific		48 related 1 [Source:FlyBase;Acc:FBgn0037475]
FBgn0038047	CG5245	3R	12744468	12745973	-	n.s.	yes
FBgn0038197	foxo	3R	11158673	11189376	-	female-specific	yes	forkhead box sub-group O [Source:FlyBase;Acc:FBgn0038197]
FBgn0038391	GATAe	3R	9295519	9303021	-	concordant	yes
FBgn0039225	Ets96B	3R	19967012	19971321	+	n.s.
FBgn0043002	Chrac-14	2L	8175331	8176070	+	female-specific		Chromatin accessibility complex 14kD protein [Source:FlyBase;Acc:FBgn0043002]
FBgn0045852	ham	2L	18058200	18082039	-	n.s.		hamlet [Source:FlyBase;Acc:FBgn0045852]
FBgn0050011	gem	2R	4371055	4384554	+	female-specific		gemini [Source:FlyBase;Acc:FBgn0050011]
FBgn0051481	pb	3R	2396402	2426246	-	n.s.		proboscipedia [Source:FlyBase;Acc:FBgn0051481]
FBgn0051632	sens-2	2L	6599861	6617088	+	concordant		senseless-2 [Source:FlyBase;Acc:FBgn0051632]
FBgn0052343	Atac3	3L	284672	287471	-	n.s.		Ada2a-containing complex component 3 [Source:FlyBase;Acc:FBgn0052343]
FBgn0250786	Chd1	2L	2845787	2854021	-	n.s.		Chromodomain-helicase-DNA-binding protein 1 [Source:FlyBase;Acc:FBgn0250786]
FBgn0259211	grh	2R	11799784	11840256	+	n.s.		grainy head [Source:FlyBase;Acc:FBgn0259211]
FBgn0261239	Hr39	2L	20317011	20340866	+	male-specific		Hormone receptor-like in 39 [Source:FlyBase;Acc:FBgn0261239]
FBgn0261617	nej	X	8998044	9017737	-	male-specific		nejire [Source:FlyBase;Acc:FBgn0261617]
FBgn0261953	TfAP-2	3L	20722818	20750032	+	n.s.		Transcription factor AP-2 [Source:FlyBase;Acc:FBgn0261953]
FBgn0262477	FoxP	3R	15364684	15369774	+	male-specific	yes	Forkhead box P [Source:FlyBase;Acc:FBgn0262477]
FBgn0262656	Myc	X	3009994	3025843	+	n.s.
FBgn0262975	cnc	3R	18387281	18428092	-	female-specific		cap-n-collar [Source:FlyBase;Acc:FBgn0262975]
FBgn0264562	Hr4	X	1678407	1732092	+	n.s.		Hormone receptor 4 [Source:FlyBase;Acc:FBgn0264562]
FBgn0265182	CG44247	2R	18643177	18647791	+	female-specific	yes
FBgn0265193	Atf-2	2R	18636406	18638041	+	male-specific	yes	Activating transcription factor-2 [Source:FlyBase;Acc:FBgn0265193]
FBgn0265784	CrebB	X	17227048	17238502	+	n.s.	yes	Cyclic-AMP response element binding protein B [Source:FlyBase;Acc:FBgn0265784]

## Sheet: female-biased CRE enrichment
motif	NES	AUC	TF_highConf	TF_lowConf	nEnrGenes	rankAtMax	enrichedGenes
tiffin__TIFDMEM0000116	7.07	0.0113			2079	4998	14-3-3epsilon;14-3-3zeta;26-29-p;312;5PtaseI;a;A16;Aac11;Aatf;Abi;Abl;abo;Ack-like;Ada2b;Ada3;AdenoK;Adf1;AdSL;AdSS;Aef1;Afti;ago;AGO1;agt;AIF;AIMP2;Akap200;akirin;Alh;alien;AlkB;alpha-Man-Ia;alpha-Man-Ib;alpha-Man-IIb;alphaCOP;Als2;alt;Amun;amx;ana1;ana3;Ankle2;aop;AP-1-2beta;AP-1gamma;AP-1mu;AP-1sigma;AP-2alpha;AP-2mu;Apc;APC10;aPKC;app;Aps;apt;Arc42;Arf51F;ArfGAP1;Arfip;Arfrp1;Arl5;arm;armi;Ar…
homer__MYGGTCACACTG_Unknown1	6.73	0.0109			2055	4978	14-3-3epsilon;14-3-3zeta;26-29-p;312;5PtaseI;a;A16;Aac11;Aatf;Abi;Abl;abo;Ack-like;Ada2a;Ada2b;AdenoK;Adf1;AdSL;AdSS;Aef1;Afti;ago;AGO1;agt;AIF;AIMP2;akirin;Alh;alien;AlkB;alpha-Man-Ia;alpha-Man-Ib;alpha-Man-IIb;alphaCOP;Als2;alt;amx;ana1;aop;AP-1-2beta;AP-1gamma;AP-1mu;AP-1sigma;AP-2alpha;AP-2mu;APC10;aph-1;aPKC;app;Aps;Arc42;Arf51F;Arf79F;ArfGAP1;Arfip;Arfrp1;Arl1;Arl5;arm;armi;Arp1;Arp8;Arpc2;…
cisbp__M2330	6.72	0.0109	pnr (directAnnotation).	BEAF-32 (inferredBy_MotifSimilarity).	1917	4969	128up;14-3-3epsilon;14-3-3zeta;26-29-p;312;a;A16;a6;Aac11;Aatf;Abl;abs;Acn;Acox57D-d;Ada;Ada2a;AdenoK;Adf1;Adk2;Aef1;Afti;ago;AGO1;Ahcy;AIMP2;AIMP3;Akap200;AlaRS;Alh;alien;AlkB;alph;alpha-Cat;alpha-Man-Ia;alpha-Man-IIa;alpha-Man-IIb;ana1;angel;aop;AP-1gamma;AP-1sigma;AP-2mu;APC4;APC7;app;apt;aralar1;Arf79F;ArfGAP1;ArgRS-m;ari-2;Arl5;arm;Arpc2;Arpc4;Art1;Art4;Art7;arx;Asap;Asciz;AsnRS;asp;AspRS;As…
homer__AVYTATCGATAD_DREF	6.62	0.0108		Dref; pnr (inferredBy_MotifSimilarity).	1937	4983	128up;14-3-3epsilon;14-3-3zeta;26-29-p;312;a;A16;a6;Aac11;Aatf;Abl;abs;Acn;Acox57D-d;Ada;Ada2a;AdenoK;Adf1;Adk2;AdSS;Aef1;Afti;ago;AGO1;Ahcy;AIMP2;AIMP3;Akap200;AlaRS;Alh;alien;AlkB;alph;alpha-Cat;alpha-Man-Ia;alpha-Man-IIa;alpha-Man-IIb;alpha4GT1;ana1;angel;aop;AP-1gamma;AP-1sigma;AP-2mu;APC4;APC7;app;aralar1;Arf79F;ArfGAP1;ArgRS-m;ari-2;Arl5;arm;Arp3;Arpc2;Art1;Art4;Art7;arx;Asap;Asciz;asf1;Asn…
jaspar__MA0536.1	6.53	0.0107		BEAF-32; pnr (inferredBy_MotifSimilarity).	1926	4994	128up;14-3-3epsilon;14-3-3zeta;26-29-p;312;a;A16;a6;Aac11;Aatf;Abl;abs;Acn;Acox57D-d;Ada;Ada2a;AdenoK;Adf1;Adk2;Aef1;Afti;ago;AGO1;Ahcy;AIMP2;AIMP3;Akap200;Akt1;AlaRS;Alh;alien;AlkB;alph;alpha-Cat;alpha-Man-Ia;alpha-Man-IIa;alpha-Man-IIb;ana1;angel;AP-1gamma;AP-1sigma;AP-2mu;APC4;APC7;app;apt;aralar1;Arf79F;ArfGAP1;ArgRS;ArgRS-m;Arl5;arm;Arp3;Arpc2;Arpc4;Art1;Art7;arx;Asap;Asciz;AsnRS;asp;AspRS;A…
cisbp__M2325	6.33	0.0105	BEAF-32 (directAnnotation).	pnr (inferredBy_MotifSimilarity).	1870	4990	128up;14-3-3epsilon;14-3-3zeta;312;a;A16;a6;Aatf;Abp1;abs;Acn;AdenoK;Adf1;AdSS;Aef1;Afti;ago;AGO1;agt;Ahcy;AIMP2;AIMP3;Akap200;AlaRS;Alh;alien;AlkB;alph;alpha-Cat;alpha-Man-Ia;alpha-Man-IIa;alpha-Man-IIb;Amun;ana1;angel;AP-1gamma;AP-1sigma;Apc;APC4;APC7;Aps;Arf79F;ArfGAP1;Arfrp1;ArgRS-m;Arl5;arm;Arp2;Arp3;Arpc2;Arpc4;Art1;Art4;Art7;Asap;Asciz;asf1;AsnRS;asp;AspRS;AspRS-m;ast;Atac3;Ate1;Atf-2;Atg1…
tiffin__TIFDMEM0000042	6.09	0.0102			1838	4991	128up;14-3-3epsilon;14-3-3zeta;140up;26-29-p;a;A16;Aac11;Abi;Abl;Acn;Ada;Ada2a;ADD1;Adf1;AdSS;Aef1;Afti;ago;AGO1;agt;Ak6;Akap200;Akt1;Alh;alph;alpha-Man-Ib;alpha-Man-IIa;alpha-PheRS;alphaCOP;Als2;alt;AMPKalpha;ana2;aop;Aos1;AP-1gamma;AP-1mu;AP-2alpha;AP-2mu;AP-2sigma;Apf;aph-1;aPKC;app;apt;Arf51F;Arf79F;Arfrp1;ArgRS-m;ari-2;Arl1;arm;armi;Arp3;Arp5;Arp6;Arpc2;Arpc3A;Art4;Art7;Art8;Asap;ash1;ash2;A…
elemento__TATCGATA	5.98	0.0101			1916	4989	128up;14-3-3epsilon;14-3-3zeta;26-29-p;312;a;A16;a6;Aac11;Aatf;Abl;abs;Acn;Ada;Ada2a;AdenoK;Adf1;Adk2;AdSS;Aef1;Afti;ago;AGO1;Ahcy;AIMP2;AIMP3;Akap200;Akt1;AlaRS;Alh;AlkB;alpha-Man-Ia;alpha-Man-IIb;ana1;ana2;angel;Ankle2;aop;AP-1sigma;AP-2mu;APC4;APC7;app;apt;aralar1;Arf79F;ArfGAP1;ArgRS;ArgRS-m;ari-2;Arl5;arm;Arpc2;Arpc3A;Arpc4;Art4;Art7;Art8;arx;Asap;asf1;ash2;AsnRS;AspRS;AspRS-m;ast;Atac3;ATbp…
predrem__nrMotif2061	5.82	0.00992			1345	4399	14-3-3epsilon;14-3-3zeta;26-29-p;4E-T;5PtaseI;a;a6;Aatf;Abi;Abl;Abp1;Ack-like;Acox57D-d;Acph-1;Ada;Ada2b;Ada3;AdenoK;Adgf-A;Adk2;AdSS;Aef1;aft;ago;AGO1;agt;Akap200;Akt1;Alh;alpha-Cat;alpha-Man-Ia;alpha-Man-Ib;Als2;alt;Amun;aop;AP-1gamma;AP-1sigma;AP-2alpha;Apc;APC4;aPKC;app;apt;Arf51F;Arfip;ari-2;Arl4;arm;Arp2;Art4;Asap;asl;AspRS;ATbp;Atg1;Atg101;Atg13;Atg17;Atg3;Atg4a;Atg5;Atu;aub;aux;Axn;B4;bab…
jaspar__MA0529.1	5.81	0.00991		BEAF-32; pnr (inferredBy_MotifSimilarity).	1831	4971	128up;14-3-3epsilon;14-3-3zeta;312;a;A16;a6;Aatf;Abp1;abs;Acn;AdenoK;Adf1;Adk2;AdSS;Aef1;Afti;ago;AGO1;agt;Ahcy;AIMP2;AIMP3;Alh;AlkB;alph;alpha-Cat;alpha-Man-Ia;alpha-Man-IIa;alpha-Man-IIb;Amun;ana1;angel;AP-1sigma;AP-2alpha;Apc;APC4;APC7;apt;Arf79F;ArfGAP1;ArgRS-m;Arl5;arm;Arp2;Arpc2;Arpc4;Art1;Art4;Art7;Asap;Asciz;ash1;AsnRS;asp;AspRS;AspRS-m;ast;Atac3;Ate1;Atf-2;Atg1;Atg13;Atg14;Atg17;Atg3;Atg…
bergman__Dref	5.64	0.00973	Dref (directAnnotation).		1939	4976	128up;14-3-3epsilon;14-3-3zeta;26-29-p;312;a;A16;a6;Aac11;Aatf;Abl;abs;Acn;Ada;Ada2a;AdenoK;Adf1;Adk2;Afti;ago;AGO1;Ahcy;AIMP2;AIMP3;Akap200;AlaRS;Alh;AlkB;alpha-Man-Ia;alpha-Man-IIb;AMPKalpha;ana1;ana2;ana3;angel;Ankle2;aop;AP-1sigma;AP-2mu;APC4;APC7;app;apt;aralar1;Arf79F;ArfGAP1;ArgRS;ArgRS-m;ari-2;Arl5;arm;Arp10;Arpc2;Arpc4;Art1;Art7;Art8;arx;Asap;asf1;AsnRS;AspRS;AspRS-m;ast;Atac3;ATbp;Ate1;…
flyfactorsurvey__CG7928_SOLEXA_5_FBgn0039740	5.53	0.00961	ZIPIC (directAnnotation).		996	3431	14-3-3epsilon;14-3-3zeta;26-29-p;a;Abl;Acox57D-d;Ada;Ada2a;Ada2b;ADD1;Adgf-A;AdSS;Afti;AGO1;agt;Ahcy;AIMP3;Akt1;Alh;alien;alph;alpha-Man-Ia;alpha-Man-Ib;alpha-Man-IIb;ana2;aop;AP-1mu;AP-2alpha;AP-2sigma;aPKC;app;Aps;apt;Archease;Arf51F;Arf79F;Arp3;Arpc3A;Art4;Asap;Ask1;asrij;Atf-2;Atg1;Atg14;Atg17;Atu;Atx2;aux;Axn;B52;Bap170;Bap60;barr;bbx;BCL7-like;beag;bel;Bem46;Best1;Bet3;beta4GalNAcTA;beta4Ga…
cisbp__M4881	5.44	0.00951	ZIPIC (directAnnotation).		545	1671	14-3-3epsilon;14-3-3zeta;26-29-p;Ada2b;ADD1;agt;AIMP3;Akt1;Alh;alien;alpha-Man-Ib;ana2;AP-2alpha;AP-2sigma;app;apt;Archease;Arf79F;Arp3;Arpc3A;asrij;Atg1;Atg17;Atu;aux;Axn;B52;Bap60;barr;bbx;BCL7-like;bel;Best1;Bet3;beta4GalNAcTB;beta4GalT7;betaTub56D;BicD;botv;br;bru1;bs;Bsg25D;Btk29A;Bx;bys;ca;CaBP1;Cad87A;CalpB;CanA-14F;caz;Cbl;Cdk12;Cdk8;ced-6;cert;CG10075;CG10366;CG10543;CG10809;CG11414;CG11…
homer__ACVAKCTGGCAGCGC_Unknown3	5.26	0.00931			1149	3431	14-3-3epsilon;14-3-3zeta;a;Abi;abs;Acf;Ada2a;Adf1;Adgf-A;Afti;AGO1;Ak6;Akap200;Akt1;Alh;alph;alpha-Man-Ib;alpha-Man-IIa;alphaCOP;aop;Aos1;AP-1gamma;AP-1sigma;AP-2sigma;Apc;aph-1;aPKC;app;Aps;apt;Arf79F;Arfrp1;ArgRS-m;Arl1;arm;armi;Arpc2;Art4;Art7;AsnRS-m;Atf-2;Atg13;Atg17;Atg18a;Atg4b;Atg5;Aven;Axn;B4;Bap111;bbx;BEAF-32;bel;Bet3;beta'COP;beta4GalNAcTA;beta4GalNAcTB;betaggt-II;Bgb;bic;bif;bip1;Blo…
yetfasco__YCR039C_1364	5.2	0.00925			255	819	Acox57D-d;Ada;AdenoK;Adgf-A;Aef1;AGO1;Akt1;Alh;aop;aPKC;apt;arm;B4;BCL7-like;bel;ben;betaTub56D;br;brat;bru1;Bx;cad;CanA-14F;CdGAPr;Cdk8;cg;CG10543;CG10898;CG10914;CG11486;CG11873;CG12112;CG12702;CG13876;CG14434;CG14440;CG14478;CG14817;CG14985;CG15601;CG16952;CG17233;CG1888;CG2691;CG2865;CG30105;CG30389;CG30497;CG30499;CG31224;CG32767;CG32803;CG3434;CG3632;CG3645;CG42231;CG42245;CG42340;CG42389;C…
transfac_pro__M07926	5.19	0.00924	ZIPIC (directAnnotation).		1477	4999	128up;14-3-3epsilon;14-3-3zeta;26-29-p;a;A16;Abi;Abl;Acn;Acph-1;Ada;Ada2a;Ada2b;ADD1;Adf1;Adgf-A;Adk2;Afti;ago;AGO1;agt;Ahcy;AhcyL1;AIF;AIMP3;Ak6;Akap200;Akt1;Alh;alien;alph;alpha-Man-Ia;alpha-Man-Ib;alpha-Man-IIb;alphaCOP;alphaTub67C;ana2;AP-2alpha;AP-2sigma;Apc;aPKC;app;Aps;apt;Archease;Arf79F;ArfGAP1;Arp3;Arpc2;Arpc3A;Art8;Asap;ash2;Ask1;asrij;Atf-2;Atg1;Atg14;Atg17;Atg18a;Atg2;Atg4b;Atg5;Atg7…
tiffin__TIFDMEM0000026	5.03	0.00906			1487	4948	14-3-3epsilon;14-3-3zeta;312;5PtaseI;a;A16;Abi;Abl;Acf;Ada2a;Ada2b;ADD1;AdenoK;Adf1;Adgf-A;AdSS;Afti;ago;AGO1;agt;Akap200;Alh;alph;alpha-Man-Ib;alpha-Man-IIa;alpha-Man-IIb;alpha-PheRS;alphaCOP;Als2;Ankle2;aop;AP-1gamma;AP-1sigma;AP-2alpha;AP-2sigma;APC10;aph-1;aPKC;app;apt;aralar1;Arc42;Arf79F;ArfGAP1;Arfrp1;ArgRS-m;Arl1;Arl5;arm;armi;Arp8;Arpc2;Art4;ash1;ash2;ast;Atf-2;Atg1;Atg18a;Atg4b;Atg5;Atu…
homer__CATCMCTA_Unknown2	4.99	0.00902			1687	4655	14-3-3epsilon;14-3-3zeta;140up;26-29-p;a;A16;Abi;Abl;Acn;Acph-1;Ada;Ada2a;ADD1;AdSL;Aef1;Afti;ago;AGO1;Ahcy;Akap200;Akt1;AlaRS;Alh;alien;alph;alpha-Man-Ib;alpha-PheRS;alphaTub67C;alt;ana2;aop;Aos1;AP-1gamma;AP-1mu;AP-1sigma;AP-2alpha;AP-2sigma;Apc2;APC4;Apf;aPKC;app;Aps;apt;Arf79F;Arfrp1;Arl1;Arl5;arm;Arp6;Arpc2;Art1;Art4;Art8;ash1;ash2;AspRS-m;asrij;ast;Atf-2;Atg1;Atg14;Atg18a;Atg2;Atg3;Atg4b;At…
jaspar__MA0044.1	4.92	0.00894			76	185	AGO1;Akap200;aop;Arpc2;br;Bx;ced-6;CG1129;CG13689;CG1888;CG2063;CG2865;CG30497;CG32772;CG3838;CG43658;CG5087;CG5541;CG5953;CG9951;chn;CrebB;Crtc;ctrip;Dl;E2f1;ens;FoxK;ftz-f1;Glut1;GlyRS;HDAC4;heph;HPS4;Hus1-like;Inx2;Inx7;jing;l(1)G0289;lola;LRR;Magi;Mi-2;Mkp3;mnb;Mnt;mRpL2;mRpL53;msi;Mur2B;nej;Pdk1;plum;pod1;por;Prosap;px;pyd;RasGAP1;rdx;Rm62;RpS5a;scny;Sema1b;skd;smg;spen;sqd;sqz;stg;Su(Tpl);t…
cisbp__M1162	4.75	0.00875			415	1345	14-3-3zeta;a;Acox57D-d;Ada;Adgf-A;AGO1;Akap200;akirin;Akt1;Alh;aop;AP-1sigma;aPKC;Arf51F;arm;Art4;Atg17;BCL7-like;bcn92;bel;ben;betaTub56D;bip1;blot;bon;br;brat;bru1;Bsg25D;Btk29A;bves;Bx;CAHbeta;CanA-14F;capt;Cdk12;Cdk8;ced-6;Cenp-C;Cf2;cg;CG10543;CG10898;CG10914;CG11396;CG11399;CG11486;CG11873;CG11964;CG12773;CG13366;CG13397;CG13625;CG13689;CG14073;CG14434;CG14440;CG14478;CG15312;CG15601;CG1723…
transfac_pro__M00488	4.74	0.00874	Dref (directAnnotation).		1901	4997	128up;14-3-3epsilon;14-3-3zeta;26-29-p;312;a;A16;a6;Aac11;Aatf;Abl;abs;Acn;Acox57D-d;Ada;Ada2a;AdenoK;Adf1;Adk2;AdSS;Aef1;Afti;ago;AGO1;Ahcy;AIMP2;AIMP3;Akap200;Akt1;Alh;alien;AlkB;alph;alpha-Man-Ia;alpha-Man-IIa;alpha-Man-IIb;alpha4GT1;alt;AMPKalpha;ana1;angel;aop;AP-1gamma;AP-2alpha;AP-2mu;APC4;app;Aps;apt;Arf79F;ArfGAP1;ArgRS-m;ari-2;Arl5;arm;Arpc4;Art1;Art4;Art7;arx;Asap;asf1;Ask1;AsnRS;asp;A…
tiffin__TIFDMEM0000109	4.65	0.00865			1544	4944	128up;14-3-3epsilon;14-3-3zeta;140up;a;A16;Aatf;Abi;Ack-like;Acn;Acox57D-d;Ada;Ada2a;Ada3;ADD1;Adgf-A;Adk2;AdSL;Afti;ago;AGO1;Akap200;akirin;Akt1;Alh;alien;alpha-Man-Ia;alpha-Man-Ib;alpha-PheRS;alphaCOP;Als2;alt;aop;Aos1;AP-1gamma;AP-1mu;AP-1sigma;AP-2alpha;AP-2sigma;Apc;APC10;APC7;Apf;aPKC;app;apt;aralar1;Arf51F;Arf79F;ArfGAP3;ari-2;Arl5;arm;Art1;Art4;Art8;ash1;ash2;AsnRS;asrij;ast;ATbp;Atf-2;At…
predrem__nrMotif1646	4.56	0.00854			1047	3656	14-3-3epsilon;14-3-3zeta;26-29-p;5PtaseI;a;Aatf;Abl;Ack-like;Ada;AdenoK;Adk2;AdSS;Aef1;Afti;ago;AGO1;AIF;Akt1;Alh;alph;alpha-Cat;amx;aop;AP-1gamma;AP-2alpha;Apc;aPKC;app;apt;Arf51F;Arfrp1;Arl4;arm;Arpc2;Art4;ash1;asp;Ate1;Atg1;Atg13;Atg18a;Atg3;Atg5;Atu;Atxn7;aub;aux;Axn;B4;babo;Bap111;BCL7-like;bcn92;Bdbt;BEAF-32;beg;bel;Best1;betaggt-II;betaTub56D;bic;bif;bin3;bip1;bmm;bon;br;Br140;brat;Bre1;Br…
cisbp__M1130	4.55	0.00854			633	2065	14-3-3epsilon;14-3-3zeta;a;A16;Acox57D-d;Ada;Adgf-A;ago;AGO1;Akap200;Akt1;Alh;alpha-Man-Ia;aop;AP-1sigma;aPKC;app;apt;Arf51F;Arf79F;Arl1;arm;Arpc2;Arpc4;Art4;ast;Atg17;Atg3;babo;BCL7-like;bcn92;bel;ben;beta-PheRS;betaTub56D;BicD;br;brat;brm;bru1;Bsg25D;BtbVII;Btk29A;bves;Bx;Cad87A;Cad99C;CAHbeta;CanA-14F;capt;CBP;Ccs;Cdk12;ced-6;Cenp-C;Cf2;cg;CG10005;CG10366;CG10492;CG10543;CG10898;CG10914;CG1096…
tiffin__TIFDMEM0000005	4.53	0.00851			1913	4981	128up;14-3-3epsilon;14-3-3zeta;26-29-p;312;a;A16;a6;Aatf;Abl;abs;Ack-like;Acn;Ada;Ada2a;AdenoK;Adk2;AdSS;aft;Afti;ago;AGO1;Ahcy;AIMP2;AIMP3;Akap200;AlaRS;Alh;alien;AlkB;alph;alpha-Man-Ia;alpha-Man-IIa;alpha-Man-IIb;alpha4GT1;AMPKalpha;ana1;ana2;angel;AP-1gamma;AP-1sigma;AP-2alpha;AP-2mu;APC4;APC7;app;apt;aralar1;Arf79F;ArfGAP1;ArgRS;ArgRS-m;ari-2;Arl4;Arl5;arm;Arpc4;Art4;Art7;arx;Asap;Asciz;asf1;…
elemento__GCGCGCC	4.42	0.00839			1158	3982	128up;14-3-3epsilon;14-3-3zeta;26-29-p;a;Aatf;Abl;Abp1;Acf;Acox57D-d;Ada2b;ADD1;Adf1;Adgf-A;Aef1;Afti;ago;AGO1;AIMP2;Akap200;Alh;alph;alpha-Cat;Amun;ana3;Ankle2;aop;AP-1gamma;AP-2mu;Apc;Apc2;aPKC;app;Aprt;Aps;apt;aralar1;Arf51F;ArfGAP1;Ars2;Art1;Art4;Arv1;asf1;ash1;Atf-2;Atg1;Atg101;Atg14;atms;Atu;Atx2;aurA;aux;B4;babo;barc;baz;bbx;BCL7-like;bcn92;Best1;Bet3;beta-PheRS;beta'COP;beta4GalT7;bic;Bic…
cisbp__M1876	4.4	0.00838			73	185	Akap200;aop;ben;br;Bx;CanA-14F;CG1129;CG1888;CG2063;CG2865;CG30497;CG32772;CG32816;CG43658;CG5087;CG5541;CG5953;CG9328;CG9951;coro;CrebB;Crtc;ctrip;Dl;E2f1;ens;FoxK;ftz-f1;Glut1;GlyRS;HDAC4;HPS4;Hus1-like;Inx2;Inx7;jing;lola;LRR;Magi;Mi-2;Mkp3;mnb;Mnt;mRpL2;msi;Mur2B;osp;Pdk1;pod1;por;Prosap;px;pyd;RasGAP1;raw;rdx;Rm62;RpS5a;sba;scny;Sema1b;skd;smg;spen;sqd;sqz;Su(Tpl);timeout;Tlk;Tollo;Vha68-2;w…
jaspar__MA0210.1	4.36	0.00833	ara (directAnnotation).		1243	4138	14-3-3epsilon;14-3-3zeta;26-29-p;A16;Aac11;Acox57D-d;Acph-1;Ada;Ada2b;Adat1;AdenoK;Adgf-A;AdSS;Aef1;Afti;ago;AGO1;Akap200;akirin;Akt1;Alh;alph;alpha-Man-Ib;alpha-Man-IIb;alphaTub67C;Als2;alt;Amun;aop;AP-1gamma;AP-1sigma;AP-2alpha;aPKC;app;Aps;apt;Arf51F;Arfrp1;arm;Arp2;Arpc2;Art4;Asap;ash1;Ask1;Atg1;Atg13;Atg17;Atg18a;Atg3;Atg7;aub;aux;Axn;B4;babo;baz;bbx;bc10;BCL7-like;bcn92;Bdbt;BEAF-32;ben;Bes…
cisbp__M0682	4.33	0.0083			1029	3598	14-3-3epsilon;14-3-3zeta;26-29-p;a;Aatf;Abl;Abp1;Acf;Acox57D-d;Ada;Adgf-A;Adk2;Afti;ago;AGO1;AhcyL1;Akap200;akirin;Akt1;Alh;alph;alpha-Cat;alt;aop;AP-1gamma;AP-1sigma;Apc;aPKC;app;apt;Arf51F;ari-2;arm;Arp2;Arpc2;Art1;Art4;Asciz;asp;ast;Atg13;Atg17;Atg3;Atg4a;Atg5;Atu;Atx2;aub;aux;Axn;B4;babo;baz;bc10;BCL7-like;bcn92;Bdbt;beg;bel;ben;beta-PheRS;beta'COP;betaTub56D;bgm;bif;bip1;blot;bmm;boi;bon;br;…
tiffin__TIFDMEM0000098	4.33	0.0083			1835	4982	128up;14-3-3epsilon;14-3-3zeta;26-29-p;312;a;A16;a6;Aac11;Aatf;abs;Ack-like;Acn;Acox57D-d;Ada;Ada2a;AdenoK;Adf1;AdSS;Aef1;Afti;ago;AGO1;Ahcy;AIMP2;AIMP3;AlaRS;Alh;alien;AlkB;alph;alpha-Cat;alpha-Man-Ib;alpha-Man-IIa;ana1;angel;aop;AP-1gamma;AP-1sigma;AP-2alpha;Apc2;APC4;app;apt;aralar1;Arf79F;ArfGAP1;ArgRS-m;ari-2;Arl4;Arl5;arm;Arp3;Arpc2;Art1;Art4;Art7;Asap;Asciz;AsnRS;AspRS;AspRS-m;ast;Atac3;At…
tiffin__TIFDMEM0000074	4.31	0.00827			1825	4999	128up;14-3-3epsilon;14-3-3zeta;26-29-p;312;a;A16;Aac11;abo;abs;Acf;Ack-like;Acn;Ada;Ada2a;AdenoK;Adf1;Adk2;AdSS;Aef1;aft;Afti;ago;AGO1;agt;Ahcy;AIMP2;AIMP3;Akt1;Alh;alien;AlkB;alph;alpha-Man-Ib;alpha-Man-IIa;alpha-Man-IIb;AMPKalpha;Amun;ana1;Ankle2;aop;Aos1;AP-1gamma;AP-1sigma;AP-2alpha;AP-2sigma;APC4;APC7;app;Aps;apt;Arf79F;ArfGAP1;ArgRS;ArgRS-m;ari-2;Arl5;arm;Arp10;Arp2;Arpc2;Arpc4;Art1;Art4;Ar…
cisbp__M0558	4.3	0.00827			216	688	Abl;ago;Akap200;alpha-Cat;aop;Arf79F;BCL7-like;boi;br;brat;bru1;bs;Btk29A;CaBP1;cad;Cad87A;CdGAPr;Cf2;CG10428;CG10466;CG10543;CG11137;CG1129;CG11486;CG12945;CG13366;CG13603;CG16885;CG17724;CG1824;CG1888;CG1910;CG3008;CG31224;CG31612;CG31935;CG32066;CG32147;CG32365;CG32767;CG32772;CG34401;CG3655;CG3689;CG4022;CG42245;CG43658;CG43867;CG44838;CG4768;CG5541;CG5902;CG5953;CG6163;CG6418;CG7737;CG8031;C…
scertf__fordyce.MATA2	4.28	0.00825			229	704	26-29-p;a;Acox57D-d;Ada;Adk2;Aef1;AGO1;akirin;Akt1;aPKC;arm;aux;BCL7-like;betaTub56D;bip1;br;brat;bru1;Bx;Cad99C;CanA-14F;Cf2;cg;CG10462;CG10492;CG10543;CG10914;CG11486;CG11593;CG11964;CG12773;CG13366;CG13827;CG14073;CG14434;CG14440;CG14478;CG14817;CG1647;CG16952;CG17233;CG1888;CG2321;CG2865;CG30499;CG31249;CG32767;CG32803;CG33181;CG3434;CG3632;CG42238;CG42245;CG42340;CG4364;CG43658;CG43736;CG448…
cisbp__M0411	4.25	0.00821			616	2223	14-3-3zeta;a;A16;a6;Aatf;Ack-like;Acox57D-d;Ada;AdenoK;Adgf-A;ago;AGO1;Akap200;akirin;Akt1;Alh;alph;alpha-Cat;aop;AP-1sigma;Apc;app;apt;ari-2;Arl5;arm;Arpc2;Asap;Atg10;Atg17;aux;babo;bc10;BCL7-like;bcn92;BEAF-32;bel;ben;beta-PheRS;beta'COP;betaTub56D;bif;bip1;boi;bon;bonsai;br;brat;bru1;BtbVII;Bx;c11.1;c12.2;CAHbeta;CanA-14F;capt;CBP;CDK2AP1;Cdk8;Cdk9;cert;Cf2;cg;CG10188;CG10543;CG11030;CG1129;CG…
transfac_pro__M00333	4.23	0.00818			1090	3657	14-3-3epsilon;A16;Aatf;Abl;Acf;Acox57D-d;Ada;Adf1;Adgf-A;AdSS;Aef1;AGO1;Akap200;akirin;Akt1;Alh;alph;alpha-Cat;alt;aop;AP-1gamma;AP-1sigma;AP-2alpha;AP-2mu;Apc;app;Aprt;apt;aralar1;Arc42;ArgRS-m;ari-2;arm;Arp2;Arpc2;Art4;ash1;Ask1;ast;Atg17;Atg5;Atx2;Atxn7;aurA;B4;babo;Bap170;barc;baz;bbx;bc10;BCL7-like;bcn92;bel;ben;beta-PheRS;beta4GalT7;bic;BicC;BicD;bif;bip1;blot;boca;boi;bon;br;Br140;brat;Brf…
taipale_tf_pairs__TFAP4_DLX3_NNCAGCTGNNNNNNNTAATTN_HT	4.19	0.00814	crp (inferredBy_Orthology).		1557	4938	14-3-3zeta;140up;312;a;Abl;Acox57D-d;Acox57D-p;Ada;Ada2b;Adck;AdenoK;Adf1;Adgf-A;AdSS;Aef1;Afti;AGO1;Ahcy;akirin;AlaRS-m;Alh;alien;alpha-Cat;alpha-Man-Ia;alpha-Man-IIb;alpha-PheRS;alpha4GT1;Als2;alt;AMPKalpha;ana1;angel;aop;AOX3;AP-2sigma;APC10;Apc2;Apf;aPKC;app;Aprt;apt;ArgRS;ArgRS-m;ari-2;Arl4;Arl5;Arp10;Art7;Arv1;asf1;Atac1;Atg1;Atg13;Atg17;Atg5;atms;Atxn7;aurA;Aven;Axn;az2;B4;B52;baz;bbx;bcn9…
elemento__GTGTGACC	4.19	0.00814			1781	4896	14-3-3epsilon;14-3-3zeta;26-29-p;312;5PtaseI;a;A16;Aatf;Abi;Abl;abo;Ack-like;Ada2b;AdenoK;Adf1;AdSL;AdSS;Aef1;Afti;ago;AGO1;agt;AIF;Akap200;akirin;Akt1;Alh;alien;AlkB;alph;alpha-Man-Ia;alpha-Man-Ib;Als2;alt;amx;ana1;Ankle2;aop;AP-1-2beta;AP-1gamma;AP-1mu;AP-1sigma;AP-2alpha;AP-2mu;APC10;aPKC;app;Aps;apt;Arc42;Arf51F;Arf79F;ArfGAP1;Arfip;Arfrp1;ArgRS-m;Arl1;Arl5;arm;Arp1;Arp8;Arpc2;Arpc3A;Arpc4;Ar…
cisbp__M0408	4.18	0.00813			620	2083	14-3-3epsilon;14-3-3zeta;a;Abl;Acox57D-d;Ada;Adgf-A;ago;AGO1;Akap200;Akt1;Alh;alpha-Man-Ia;alt;aop;AP-1gamma;AP-1sigma;aPKC;app;apt;ArgRS-m;arm;Art4;ast;Atg1;Atg17;Atu;B4;babo;BCL7-like;bcn92;beg;bel;ben;beta-PheRS;betaTub56D;BicD;boi;br;brat;bru1;BtbVII;Bub1;bves;Bx;c11.1;cad;CAHbeta;CanA-14F;Capr;capt;Cda4;ced-6;Cenp-C;Cf2;cg;CG10366;CG10492;CG10543;CG10738;CG10898;CG10914;CG11164;CG11357;CG113…
cisbp__M0279	4.17	0.00812			455	1569	14-3-3zeta;a;Acox57D-d;Ada;Adgf-A;aft;ago;AGO1;Akap200;Akt1;Alh;alpha-Man-Ia;aop;aPKC;app;apt;arm;Art4;ast;Atg13;B4;BCL7-like;bcn92;bel;ben;betaTub56D;bip1;br;brat;bru1;Bsg25D;bves;Bx;C1GalTA;cad;Cad99C;CanA-14F;CdGAPr;Cdk8;Cenp-C;Cf2;cg;CG10543;CG10898;CG10914;CG10960;CG11095;CG11164;CG11357;CG11396;CG11399;CG11486;CG11873;CG12054;CG12576;CG13366;CG13397;CG14073;CG14434;CG14440;CG14442;CG14478;C…
cisbp__M2019	4.15	0.0081	ara (directAnnotation).		1422	4845	14-3-3epsilon;14-3-3zeta;26-29-p;a;A16;Aac11;Acox57D-d;Acph-1;Ada;Ada2b;Adat1;Adck;ADD1;AdenoK;Adgf-A;Adk2;AdSS;Aef1;aft;Afti;ago;AGO1;agt;Akap200;akirin;Akt1;Alh;alph;alpha-Man-Ib;alpha-Man-IIb;alphaTub67C;Als2;alt;Amun;ana1;aop;AP-1gamma;AP-1mu;AP-1sigma;AP-2alpha;aPKC;app;Aps;apt;Archease;Arf51F;Arfrp1;arm;Arp2;Arpc2;Arpc4;Art4;arx;Asap;ash1;Ask1;asl;Atg1;Atg13;Atg17;Atg18a;Atg3;Atg7;Atx2;aub;…
transfac_pro__M02743	4.14	0.00809	E2f1 (inferredBy_Orthology).		678	2381	14-3-3epsilon;a;a6;Aatf;Acf;Acox57D-d;Ada;Aef1;Afti;AGO1;Akap200;Alh;alph;Amun;Ankle2;AP-2mu;app;Aprt;apt;aralar1;Arf51F;ArfGAP1;ArgRS-m;asf1;ash1;ast;Atf-2;Atg17;atms;Atx2;aurA;B4;babo;barc;baz;BCL7-like;bcn92;beta-PheRS;bic;BicC;bin3;bip1;boi;bon;bora;br;Br140;brat;Brf;bru1;BRWD3;bs;BtbVII;Btk29A;bur;bves;Bx;c11.1;cad;Cad74A;Cad87A;Caf1-55;CanA-14F;cav;Cbl;Cbp80;Cdc6;Cdk4;ced-6;Cf2;cg;CG10265;C…
cisbp__M4677	4.13	0.00807	kni (directAnnotation).		1612	4521	14-3-3epsilon;14-3-3zeta;a;A16;Abi;Acf;Acn;Ada;Ada2a;Ada2b;Ada3;ADD1;Adf1;Aef1;Afti;AGO1;agt;Ak6;Akap200;Akt1;Alh;alien;alpha-Man-Ib;alpha-Man-IIa;alpha-PheRS;alphaCOP;Als2;alt;ana2;aop;Aos1;AP-1gamma;AP-1mu;AP-2alpha;AP-2sigma;Apf;aph-1;aPKC;app;Aprt;apt;Arf51F;Arf79F;Arfrp1;ArgRS-m;Arl1;arm;armi;Arp3;Arp5;Arp6;Arpc2;Art4;Asap;ash2;asl;AsnRS-m;asrij;Ate1;Atg1;Atg14;Atg18a;Atg3;Atg4b;Atg5;Atu;Atx…
tiffin__TIFDMEM0000062	4.12	0.00807			1037	3289	14-3-3epsilon;14-3-3zeta;26-29-p;4E-T;5PtaseI;A16;Abl;Acox57D-d;Acph-1;Ada;Adgf-A;Adk2;AdSS;Aef1;aft;Afti;ago;AGO1;AhcyL1;AIMP2;akirin;Akt1;Alh;alph;alpha-Cat;alpha-Man-Ia;aop;AOX3;AP-1gamma;AP-2alpha;Apc;aPKC;app;Aprt;apt;Arf51F;arm;Asap;asp;AspRS;ATbp;Atg1;Atg13;Atg3;Atg4a;Atg5;Atu;aux;Axn;B4;Bap111;baz;BCL7-like;bcn92;bel;ben;beta-PheRS;betaTub56D;bic;bif;bin3;bip1;blot;Bmcp;bmm;bon;br;brat;Br…
tiffin__TIFDMEM0000068	4.02	0.00796			1096	3365	14-3-3epsilon;14-3-3zeta;4E-T;A16;Aac11;Aatf;Abl;Abp1;Ack-like;Acn;Acox57D-d;Ada;Adf1;Aef1;Afti;AGO1;agt;AhcyL1;Akap200;akirin;Akt1;Alh;alph;alpha-Man-Ia;alphaTub67C;Amun;aop;AP-1gamma;AP-1mu;AP-1sigma;AP-2alpha;AP-2mu;Apc;aPKC;app;apt;Arf51F;Arf79F;ArfGAP1;ArfGAP3;Arfip;Arp2;Arp3;Art4;Asap;ash1;ash2;asp;ATbp;Atg1;Atg13;Atg17;Atg3;Atg4a;Atg5;atms;Atu;aux;Axn;B4;babo;Bap111;barc;baz;bbx;bc10;BCL7-…
cisbp__M0754	4	0.00794	FoxK; bin; fd19B; slp1; slp2 (inferredBy_Orthology).		1039	3593	14-3-3epsilon;14-3-3zeta;a;Abl;Acf;Acox57D-d;Ada;Ada2b;Ada3;Adgf-A;Afti;ago;AGO1;Akap200;akirin;Akt1;Alh;alph;alpha-Man-Ia;Als2;alt;Amun;aop;AP-1gamma;AP-2alpha;AP-2mu;APC10;aPKC;app;Aps;apt;Arc42;Arf79F;ArgRS-m;ari-2;Arl1;Arl5;arm;Arpc2;Art1;Art4;ash1;Ask1;AspRS-m;ast;Atg1;Atg17;Atg3;atms;Atu;Atx2;aurB;Axud1;B4;babo;Bap170;bbx;BCL7-like;bcn92;bel;ben;Best1;beta-PheRS;beta'COP;betaTub56D;BicD;Bin…
transfac_pro__M06140	3.91	0.00783			31	58	Alh;app;Arf79F;brat;Btk29A;CG11137;CG11486;CG11873;CG1657;CG32767;CG4078;CG9926;cib;Dp1;EcR;Fancm;Fmr1;for;hppy;IntS6;jigr1;jumu;jvl;Mlc-c;Mur2B;ovo;Pp2B-14D;Tl;tou;TrpRS;zip
yetfasco__YPR104C_2203	3.89	0.00781	FoxK; bin; fd19B; slp1; slp2 (inferredBy_Orthology).		489	1562	14-3-3epsilon;a;Abl;Acox57D-d;Adgf-A;ago;AGO1;Akap200;akirin;Akt1;Alh;alpha-Man-Ia;alt;aop;aPKC;apt;ArgRS-m;arm;Art4;ash1;ast;Atg17;Atu;Atx2;Axud1;BCL7-like;bcn92;ben;Best1;BicD;boi;br;brat;bru1;bs;Btk29A;bves;Bx;Cad74A;Cad87A;CAHbeta;CanA-14F;Cda4;Cf2;cg;CG10366;CG10543;CG10898;CG10914;CG11164;CG11396;CG11399;CG11444;CG11486;CG11873;CG12054;CG12112;CG12895;CG13366;CG13625;CG13917;CG14073;CG14442…
elemento__ACATATG	3.88	0.0078			55	136	Akt1;B4;betaTub56D;br;brat;bru1;ced-6;CG12054;CG14434;CG14440;CG14478;CG16952;CG1888;CG3632;CG42245;CG42340;CG44838;CG9650;CG9911;chn;crol;Cyp1;dor;Dredd;Dsp1;Fs(2)Ket;Fur2;fz;fz4;hll;Hr39;Hsp27;hyd;jumu;kuz;lola;mei-P26;MEP-1;Mur2B;NaPi-III;NFAT;nonA;nuf;ovo;Pal1;Pdcd4;Raf;Rca1;Rgl;robl;sqd;su(sable);tsr;Usp7;wech
transfac_pro__M07857	3.81	0.00773	BtbVII (directAnnotation).		1218	4504	14-3-3epsilon;14-3-3zeta;26-29-p;5PtaseI;a;A16;Aatf;Abi;Abl;Ack-like;Acn;Ada;Ada2b;Adf1;Adgf-A;Adk2;AdSS;Aef1;ago;AGO1;agt;AhcyL1;Akap200;akirin;Akt1;Alh;alph;alpha-Man-Ia;alpha-Man-Ib;alpha-Man-IIb;Amun;aop;AP-1gamma;AP-2alpha;AP-2sigma;Apc;APC4;aPKC;app;Aprt;apt;Arf51F;ArfGAP1;ArfGAP3;Arfrp1;arm;Arpc2;Art1;Art4;Arv1;ash1;AspRS;ATbp;Atg1;Atg10;Atg101;Atg13;Atg17;Atg3;Atg4a;Atg5;atms;Atu;Atxn7;au…
swissregulon__sacCer__NHP6B	3.77	0.00769		Tbp (inferredBy_MotifSimilarity_n_Orthology).	468	1611	14-3-3epsilon;14-3-3zeta;Aatf;Abl;Acox57D-d;Ada;aft;AGO1;AhcyL1;Akap200;akirin;Akt1;alpha-Man-Ia;Amun;AP-1gamma;Apc;aPKC;app;Aps;Arf51F;Art4;asp;Atg1;Atg3;Atg4a;Atg5;Atu;B4;babo;Bap111;barc;baz;BCL7-like;bcn92;bel;bic;bin3;bip1;bon;br;brat;Brf;bru1;bs;Btk29A;Bx;cact;cad;Cad87A;CanA-14F;Cbl;Cbp80;Cdc42;CdGAPr;CDK2AP1;Cdk8;cdm;Cf2;cg;CG10341;CG10376;CG10492;CG10543;CG10915;CG11030;CG11095;CG11486;C…
cisbp__M4536	3.76	0.00767	E2f1 (inferredBy_Orthology).		498	1642	14-3-3epsilon;Acf;Aef1;AGO1;Akap200;Alh;alph;alt;Amun;aop;AP-1sigma;AP-2mu;aPKC;app;Aprt;apt;aralar1;ArgRS-m;Arp2;ast;Atg1;B4;babo;BCL7-like;bcn92;beta-PheRS;bic;bip1;boi;bon;Br140;brat;bru1;bs;BtbVII;Btk29A;btz;Bx;Cad87A;CanA-14F;Cbl;Cbp80;CdGAPr;ced-6;Cf2;cg;CG10366;CG10543;CG10939;CG11030;CG11095;CG11200;CG11279;CG11396;CG11399;CG1142;CG11486;CG11837;CG11873;CG12164;CG12213;CG12428;CG12818;CG1…
scertf__pachkov.SPT15	3.76	0.00767	Tbp; Trf; Trf2 (inferredBy_Orthology).		622	2006	14-3-3epsilon;14-3-3zeta;Abl;Abp1;Acn;Acox57D-d;Ada;Adf1;aft;AGO1;AhcyL1;akirin;Akt1;Alh;alt;Amun;aop;AP-1gamma;Apc;aPKC;app;apt;Arf51F;ArfGAP3;Art4;ash2;asp;ATbp;Atg1;Atg13;Atg3;Atg4a;B4;Bap111;baz;bc10;BCL7-like;bcn92;bel;bif;bin3;bip1;br;brat;Brf;bru1;bs;BtbVII;Btk29A;Bx;cact;cad;Cad87A;CanA-14F;caz;Cbl;Cbp80;Cdc42;CdGAPr;Cdk12;CDK2AP1;Cdk4;Cdk8;cdm;cert;Cf2;cg;CG10341;CG10376;CG10462;CG10492;…
cisbp__M0432	3.74	0.00765			1489	4874	128up;14-3-3epsilon;14-3-3zeta;26-29-p;a;A16;Aatf;Abl;Acf;Acox57D-d;Ada;ADD1;Adf1;Adgf-A;AdSL;Aef1;Afti;ago;AGO1;AIMP2;Akap200;akirin;Akt1;Alh;alph;alpha-Cat;alpha-Man-Ia;alpha-Man-IIb;alt;Amun;aop;AP-1gamma;AP-2alpha;AP-2mu;Apc;aPKC;app;Aprt;Aps;apt;aralar1;Arc42;Arf51F;Arf79F;ArfGAP1;ArgRS-m;Arl1;Arp2;Arpc4;Art4;ash1;Ask1;AspRS-m;asrij;ast;Atg1;Atg13;Atg17;Atg18a;atms;Atu;Atx2;aurA;B4;babo;Bap1…
transfac_pro__M01938	3.74	0.00765			783	2553	14-3-3epsilon;a;Abl;Acf;Acox57D-d;AdenoK;Adgf-A;Aef1;AGO1;Akap200;akirin;Akt1;Alh;alph;alpha-Man-Ia;alt;aop;AP-1gamma;aPKC;app;apt;Arf79F;Arfrp1;ArgRS-m;ari-2;Arl5;arm;Art4;ast;Atg1;B4;babo;barc;baz;bbx;BCL7-like;bcn92;beg;bel;ben;beta-PheRS;BicC;BicD;boi;bon;br;Br140;brat;bru1;BRWD3;bs;Bsg25D;BtbVII;Btk29A;bur;bves;Bx;Bx42;cact;cad;Cad87A;CanA-14F;cav;Cbl;CBP;Ccs;Cda4;Cdc42;Cdk4;Cf2;cg;CG10366;C…
cisbp__M0231	3.73	0.00764		SREBP; bigmax (inferredBy_MotifSimilarity).Mitf; Mondo; Usf (inferredBy_MotifSimilarity_n_Orthology).	332	1059	a;Acox57D-d;Ada;AdenoK;Adgf-A;AGO1;Akap200;akirin;Akt1;Alh;alpha-Man-Ia;aop;aPKC;apt;Arf79F;ast;Atg17;BCL7-like;bcn92;ben;beta-PheRS;br;brat;bru1;Bsg25D;BtbVII;Btk29A;bves;Bx;cad;CAHbeta;CanA-14F;ced-6;Cf2;cg;CG10366;CG10543;CG10914;CG10960;CG11137;CG11396;CG11399;CG11486;CG11873;CG13397;CG13625;CG14073;CG14434;CG14440;CG14442;CG14478;CG15387;CG17233;CG17327;CG18508;CG1888;CG1910;CG2063;CG2865;CG…
flyfactorsurvey__Dref_FlyReg_FBgn0015664	3.65	0.00755	Dref (directAnnotation).		1826	4855	128up;14-3-3epsilon;14-3-3zeta;26-29-p;312;a;A16;a6;Aac11;Aatf;Abp1;abs;Acn;Ada;AdenoK;Adk2;AdSS;Aef1;Afti;ago;AGO1;Ahcy;AIMP2;AIMP3;Akap200;Akt1;AlaRS;Alh;AlkB;alph;alpha-Man-Ia;alpha-Man-IIa;alpha-Man-IIb;alpha4GT1;AMPKalpha;Amun;ana1;angel;aop;AP-1gamma;AP-1sigma;AP-2alpha;AP-2mu;APC4;app;Aprt;Aps;apt;Arf51F;Arf79F;ArfGAP1;Arl5;arm;Arp2;Arpc2;Arpc4;Art7;arx;Asap;asf1;AsnRS;AspRS;AspRS-m;ast;At…
predrem__nrMotif1836	3.63	0.00753			1270	4762	14-3-3epsilon;14-3-3zeta;a;A16;a6;Aatf;Abi;Ada2a;Ada2b;ADD1;Adf1;Adgf-A;AdSL;AdSS;Afti;ago;AGO1;agt;Akap200;akirin;Akt1;Alh;alph;alpha-Man-Ia;alpha-Man-Ib;alpha-PheRS;alphaCOP;Als2;alt;Amun;ana1;aop;Aos1;AP-1gamma;APC4;aph-1;aPKC;app;apt;Arf51F;Arf79F;ArfGAP1;ArgRS-m;Arl1;arm;Art4;ash2;ast;ATbp;Atg1;Atg13;Atg17;Atg18a;Atg4b;Atg5;Atu;Atxn7;B4;Bap170;baz;bbx;BCAS2;BCL7-like;Bem46;Best1;beta-PheRS;b…
predrem__nrMotif2189	3.63	0.00753			1111	3473	14-3-3epsilon;14-3-3zeta;26-29-p;4E-T;a;A16;Aac11;Abl;Acn;Acox57D-d;Acph-1;Ada;Adf1;AdSS;Aef1;aft;Afti;ago;AGO1;agt;AhcyL1;Akap200;akirin;Akt1;Alh;alph;alpha-Man-Ia;Amun;aop;AP-1gamma;AP-1sigma;AP-2alpha;AP-2mu;Apc;aPKC;app;apt;Arf51F;Arf79F;Arfip;Arp2;Arp3;Arpc4;Art4;Asap;ash2;asp;ATbp;Atg1;Atg13;Atg17;Atg3;Atg4a;Atg5;atms;Atu;aux;Axn;B4;babo;Bap111;barc;baz;bbx;bc10;BCL7-like;bcn92;Bdbt;BEAF-32…
factorbook__E2F1	3.59	0.00749	E2f1 (inferredBy_Orthology).		436	1417	14-3-3epsilon;Acf;AGO1;Akap200;Alh;alph;Amun;aop;AP-1sigma;AP-2mu;app;Aprt;apt;aralar1;ArgRS-m;Arp2;ast;Atg1;B4;babo;BCL7-like;bcn92;beta-PheRS;bic;boi;bon;Br140;brat;bru1;bs;BtbVII;Btk29A;btz;bves;Bx;cad;CanA-14F;Cbl;Cbp80;ced-6;Cf2;cg;CG10543;CG10939;CG11030;CG11095;CG11200;CG11279;CG11396;CG11399;CG1142;CG11486;CG11837;CG11873;CG12164;CG12213;CG12391;CG12428;CG12818;CG12895;CG12945;CG13366;CG1…
cisbp__M1558	3.59	0.00748			291	1006	14-3-3zeta;a;Ada;AdSS;AGO1;Akap200;Alh;aop;AP-2mu;app;apt;Arf79F;Arl5;Art1;ast;Atg3;BicD;Bin1;br;brat;bru1;BRWD3;bs;Bsg25D;bys;cad;Cad87A;Capr;Cdc37;Cf2;cg;CG10543;CG10889;CG10915;CG10960;CG11007;CG11030;CG11109;CG11123;CG11486;CG11873;CG12054;CG13907;CG14478;CG14883;CG15601;CG17233;CG17272;CG2006;CG2310;CG3077;CG31091;CG31612;CG31869;CG32103;CG32645;CG32816;CG34310;CG3638;CG3652;CG42232;CG42674;…
transfac_pro__M02742	3.59	0.00748	E2f1 (inferredBy_Orthology).		891	3139	14-3-3epsilon;a;A16;a6;Abl;Acf;Acox57D-d;Ada;Aef1;Afti;AGO1;agt;Akap200;Alh;alph;alpha-Cat;Amun;Ankle2;aop;AP-1gamma;AP-2mu;aPKC;app;Aprt;Aps;apt;aralar1;Arf51F;ArfGAP1;ArgRS-m;Arl1;Art4;asf1;ash1;ast;Atf-2;Atg17;atms;Atu;Atx2;aurA;B4;babo;barc;baz;BCL7-like;bcn92;Bet3;beta-PheRS;bic;BicC;bin3;bip1;blot;boi;bon;bora;br;Br140;brat;Brf;brm;bru1;BRWD3;bs;Bsg25D;BtbVII;Btk29A;BubR1;bur;bves;Bx;c11.1;…
cisbp__M0473	3.58	0.00748			1351	4815	14-3-3epsilon;14-3-3zeta;26-29-p;a;Aatf;Abl;Acox57D-d;Ada;AdenoK;Adgf-A;AdSL;Aef1;ago;AGO1;AhcyL1;Akap200;akirin;Akt1;Alh;alph;alpha-Man-Ia;alt;aop;AP-1gamma;AP-1sigma;AP-2alpha;AP-2mu;Apc;APC10;aPKC;app;Aprt;Aps;apt;Arf51F;Arf79F;ArfGAP1;Arfrp1;ArgRS-m;ari-2;Arl5;arm;Arpc2;Arpc4;Art4;Asap;ash1;AspRS-m;ast;ATbp;Atg1;Atg13;Atg17;Atg18a;Atg3;Atg5;Atu;Atx2;Axs;B4;babo;barc;baz;bbx;bc10;BCL7-like;bcn…
cisbp__M0440	3.57	0.00747			1136	3983	14-3-3zeta;26-29-p;4E-T;a;A16;a6;Abl;Acox57D-d;Ada;Aef1;ago;AGO1;agt;AhcyL1;Akap200;akirin;Akt1;Alh;alph;alpha-Cat;alpha-Man-Ia;alpha-Man-IIb;alt;aop;AP-1gamma;Apc;app;apt;aralar1;Arf79F;ArfGAP1;arm;Arpc2;Arpc4;Art4;Asap;ash1;Ask1;asl;Ate1;Atg1;Atg10;Atg13;Atg17;atms;Atu;Atx2;Atxn7;aux;Axn;az2;B4;babo;Bap111;barc;baz;bc10;BCL7-like;bcn92;Bdbt;be;BEAF-32;beg;bel;ben;beta-PheRS;betaggt-II;betaTub56…
homer__AACAGCTGTTHN_E-box	3.56	0.00745		amos (inferredBy_MotifSimilarity).crp (inferredBy_MotifSimilarity_n_Orthology).	1349	4530	140up;26-29-p;a;A16;Abl;Acf;Acox57D-d;Acox57D-p;Ada2b;Adck;AdenoK;Adf1;Adgf-A;AdSS;Afti;AGO1;akirin;Akt1;AlaRS-m;Alh;alph;alpha-Man-Ia;alpha-PheRS;Als2;alt;ana1;angel;AP-1gamma;AP-2sigma;APC10;Apc2;aPKC;app;Aprt;apt;ArgRS-m;ari-2;Arv1;asf1;AsnS;Atac1;ATbp;Atg1;Atg13;Atg17;Atg2;Atg4b;atms;Atxn7;aurA;Aven;az2;B4;babo;baz;bbx;bcn92;beg;Bem46;beta4GalNAcTA;beta4GalNAcTB;betaggt-I;betaggt-II;bgm;BicD;…
yetfasco__YDR259C_599	3.55	0.00744		CG7786; Pdp1; gt; vri (inferredBy_MotifSimilarity_n_Orthology).	1279	4555	14-3-3epsilon;14-3-3zeta;26-29-p;5PtaseI;a;Aatf;Abi;Abl;Abp1;Acox57D-d;Acph-1;Ada;Ada2b;Ada3;Adck;AdenoK;Adf1;Adk2;AdSL;AdSS;Aef1;aft;Afti;ago;AGO1;AhcyL1;AIMP2;Akap200;akirin;Akt1;AlaRS-m;Alh;alph;alpha-Cat;alpha-Man-IIb;Amun;aop;AP-1gamma;AP-1mu;AP-1sigma;AP-2alpha;Apc;Apf;aPKC;app;Aps;apt;aralar1;arm;Art4;Arv1;Asap;ash1;Ask1;asp;AspRS;ast;Atg1;Atg10;Atg13;Atg14;Atg2;Atg3;Atg4a;Atg4b;Atg5;Atu;A…
hdpi__CANX	3.55	0.00744	CG1924; Cnx14D; Cnx99A (inferredBy_Orthology).		1344	4761	14-3-3epsilon;14-3-3zeta;140up;26-29-p;a;a6;Aatf;Abl;Acf;Acox57D-d;Ada2b;AdenoK;Adgf-A;AdSL;Aef1;aft;Afti;ago;AGO1;Akap200;akirin;Akt1;Alh;alph;alpha-Man-Ia;alt;Amun;aop;AP-1gamma;AP-1sigma;AP-2alpha;APC10;aPKC;app;Aprt;apt;Arc42;Archease;Arf79F;Arfrp1;ArgRS-m;ari-2;Arl1;Arl5;arm;Arpc2;Art1;Art4;Asap;Asciz;Ask1;AspRS-m;ast;ATbp;Atg1;Atg17;Atg18a;atms;Atu;Atx2;aux;B4;babo;barc;bbx;BCL7-like;bcn92;…
tiffin__TIFDMEM0000091	3.52	0.00741			1516	4858	14-3-3epsilon;14-3-3zeta;a;A16;a6;Aatf;Abi;Abl;abs;Ack-like;Acn;Ada;Ada2b;ADD1;AdSL;Aef1;Afti;ago;AGO1;agt;AhcyL1;Akap200;akirin;Akt1;Alg10;Alh;alien;alpha-Man-IIb;Als2;alt;Amun;ana1;ana3;Ankle2;aop;AP-1-2beta;AP-1gamma;AP-2alpha;AP-2mu;APC10;Apf;aPKC;app;Aps;apt;Arc42;Archease;Arf51F;ArfGAP1;ari-2;arm;Arp1;Arp6;Arp8;Arpc2;Arpc4;Ars2;Art1;Art3;Art4;Art8;Arv1;Ask1;ast;Atac2;Atf-2;Atg1;Atg10;Atg13;…
cisbp__M2889	3.52	0.00741			57	153	B4;brat;Cad99C;cg;CG10543;CG14434;CG14478;CG2617;CG30101;CG3632;CG3655;CG42238;CG42245;CG42389;CG9650;CG9911;Cyp1;da;Dredd;Dsp1;fal;FoxK;Fur2;GATAd;gpp;hll;Hsp27;hyd;jing;jumu;ken;kibra;klar;mam;MEP-1;mRpL2;mRpS7;nonA;Pdcd4;PPP1R15;Prosalpha5;Psc;Ptp61F;retn;robl;Sema1a;simj;SKIP;spen;su(sable);Tlk;tou;tsr;ttk;ush;Usp7;zld
hdpi__MSI1	3.51	0.0074	Rbp6 (inferredBy_Orthology).		1229	4104	14-3-3epsilon;14-3-3zeta;26-29-p;a;A16;a6;Aatf;Abl;Ack-like;Acox57D-d;Acph-1;Ada;AdenoK;Adgf-A;Adk2;Aef1;aft;Afti;ago;AGO1;AhcyL1;Akap200;Akt1;Alh;alph;alpha-Man-Ia;alphaTub67C;alt;Amun;aop;AP-1gamma;AP-1sigma;AP-2alpha;Apc;aPKC;app;apt;aralar1;Arf51F;ArgRS-m;arm;Arpc2;Art4;Asap;AspRS-m;Atg13;Atg17;Atg18a;Atg3;Atg4a;Atg5;Atu;aux;Axn;Axud1;B4;B52;babo;baz;bbx;bc10;BCL7-like;bcn92;Bdbt;be;BEAF-32;b…
hdpi__RBM3	3.51	0.0074	tra2 (inferredBy_Orthology).		1224	4302	14-3-3epsilon;14-3-3zeta;26-29-p;5PtaseI;a;A16;Abl;Abp1;Ack-like;Acox57D-d;Acph-1;Ada;AdenoK;Adgf-A;Adk2;AdSS;Aef1;aft;ago;AGO1;Akap200;akirin;Akt1;Alh;alph;alpha-Cat;alpha-Man-Ia;alt;Amun;aop;AP-1gamma;AP-1sigma;AP-2alpha;aPKC;app;apt;Arf51F;arm;Arp2;Art4;Asap;asp;AspRS;AspRS-m;ast;Atg1;Atg13;Atg17;Atg3;Atg4a;Atg5;Atu;aub;aux;Axn;B4;babo;Bap111;baz;bc10;BCL7-like;bcn92;Bdbt;BEAF-32;bel;ben;beta-…
cisbp__M1675	3.51	0.0074			1367	4984	14-3-3epsilon;14-3-3zeta;a;a6;Aatf;Abl;Acf;Acn;Acox57D-d;Ada;ADD1;AdenoK;Adf1;Adgf-A;ago;AGO1;Akap200;akirin;Akt1;Alh;alph;alpha-Man-Ia;alt;Amun;aop;AP-1gamma;AP-2alpha;AP-2mu;Apc;aPKC;app;Aprt;Aps;apt;Arc42;Arf51F;Arf79F;ArfGAP1;ArgRS-m;Arl1;arm;Arpc2;Arpc4;Art1;Art4;ash1;Ask1;asp;ast;Atf-2;Atg13;Atg17;Atg3;atms;Atu;Atx2;Axn;B4;B52;babo;baz;BCL7-like;bcn92;Bdbt;beg;ben;Best1;beta-PheRS;beta'COP;…
bergman__sd	3.49	0.00738	sd (directAnnotation).		72	192	Alh;arm;BCL7-like;Cdk8;cg;CG10543;CG11486;CG14434;CG17233;CG1888;CG30499;CG32767;CG32772;CG32803;CG42245;CG44838;CG45071;CG5800;CG5937;CG6951;CG9265;CG9650;Clc;da;Dredd;Dsp1;dtn;egl;fax;FoxK;fs(1)h;Fur2;Gprk2;hdc;Hip14;Hr4;hts;Inx2;Inx7;Kdm2;ken;lid;mei-P26;MEP-1;Mnt;mRpL2;mRpS7;Mrtf;MTF-1;mub;nsl1;ovo;Pdcd4;Pfdn5;plum;psq;PTP-ER;Ptpmeg2;Raf;RasGAP1;RhoGAPp190;RhoGEF64C;sbb;Sin3A;sqd;su(sable);tr…
predrem__nrMotif548	3.49	0.00737			246	809	14-3-3epsilon;Acf;Acox57D-d;Aef1;AGO1;Alh;aurA;babo;barc;bcn92;beta-PheRS;bif;brat;bru1;bs;bur;CanA-14F;cav;Cbp80;Cf2;cg;CG10543;CG10809;CG11030;CG11396;CG11399;CG11486;CG11964;CG12104;CG12213;CG12267;CG12863;CG13126;CG13192;CG13917;CG14715;CG14985;CG15312;CG15601;CG16884;CG18065;CG1888;CG2116;CG31122;CG31495;CG31869;CG32099;CG32772;CG3437;CG4078;CG42245;CG42327;CG43658;CG4615;CG5087;CG5916;CG596…
cisbp__M1167	3.48	0.00736			1221	4107	14-3-3epsilon;14-3-3zeta;4E-T;a;A16;Aac11;Aatf;Abl;Abp1;Ack-like;Acn;Acox57D-d;Ada;Ada2b;Adf1;Adk2;Aef1;ago;AGO1;agt;AhcyL1;AIF;Akap200;akirin;Akt1;Alh;alph;alpha-Man-Ia;alt;Amun;aop;AP-1-2beta;AP-1gamma;AP-1sigma;AP-2alpha;AP-2mu;Apc;aPKC;app;apt;aralar1;Arf51F;ArfGAP3;Arfip;Arp10;Arp2;Arp3;Arpc4;Art4;Asap;ash2;asp;ATbp;Atg1;Atg13;Atg17;Atg18a;Atg3;Atg4a;Atg5;atms;Atu;Atx2;aux;Axn;B4;babo;Bap111…
cisbp__M0684	3.47	0.00736			403	1446	14-3-3epsilon;14-3-3zeta;26-29-p;a;Acox57D-d;Adgf-A;AGO1;AhcyL1;Akap200;Akt1;Alh;aop;app;Aprt;apt;arm;aub;BCL7-like;bcn92;Bdbt;beg;ben;beta-PheRS;betaTub56D;bip1;blot;br;brat;bru1;Bsg25D;BtbVII;Bx;Cad88C;Cad99C;CAHbeta;CanA-14F;Cbl;CDK2AP1;cg;CG10283;CG10543;CG10960;CG11486;CG11873;CG11964;CG12054;CG12576;CG12945;CG13366;CG13397;CG13603;CG13689;CG13907;CG13917;CG14434;CG14442;CG14478;CG1463;CG149…
transfac_public__M00502	3.45	0.00733			57	153	B4;brat;Cad99C;cg;CG10543;CG14434;CG14478;CG2617;CG30101;CG3632;CG3655;CG42238;CG42245;CG42389;CG9650;CG9911;Cyp1;da;Dredd;Dsp1;fal;FoxK;Fur2;GATAd;gpp;hll;Hsp27;hyd;jing;jumu;ken;kibra;klar;mam;MEP-1;mRpL2;mRpS7;nonA;Pdcd4;PPP1R15;Prosalpha5;Psc;Ptp61F;retn;robl;Sema1a;simj;SKIP;spen;su(sable);Tlk;tou;tsr;ttk;ush;Usp7;zld
cisbp__M2324	3.45	0.00733		Dif; dl (inferredBy_MotifSimilarity_n_Orthology).	116	354	14-3-3epsilon;Abl;Akap200;aop;Arf79F;BCL7-like;boi;br;brat;bru1;Bx;cad;Cf2;CG10543;CG11137;CG13366;CG13689;CG15601;CG1824;CG3008;CG30101;CG30105;CG31224;CG32767;CG32772;CG3638;CG3655;CG42238;CG43867;CG44838;CG4768;CG5953;CG6163;CG6568;CG8180;CG8184;CG8786;CG9132;CG9650;chn;cpb;crol;CycG;DAAM;Dhit;dlt;Dys;E(Pc);E2f1;Eip63E;emc;ena;enc;fax;fend;fl(2)d;Flo2;for;g;hang;hdc;heph;hng3;hoip;hppy;Hr4;hts…
flyfactorsurvey__CG7928_SANGER_10_FBgn0039740	3.42	0.0073	ZIPIC (directAnnotation).		276	885	a;Ada2b;AIMP3;Alh;AP-2alpha;AP-2sigma;app;Arp3;asrij;Atg17;barr;Best1;beta4GalNAcTB;botv;br;Br140;Btk29A;bys;CalpB;caz;Cdk12;CG10366;CG10543;CG11534;CG11857;CG12773;CG13366;CG13921;CG14544;CG14650;CG14966;CG15011;CG17078;CG17724;CG1968;CG2006;CG2063;CG2321;CG2656;CG2691;CG31224;CG31650;CG31688;CG32066;CG32147;CG32379;CG32767;CG32816;CG3295;CG33995;CG3437;CG3645;CG42238;CG42245;CG42455;CG42748;CG4…
cisbp__M0239	3.39	0.00727		Clk (inferredBy_MotifSimilarity_n_Orthology).	169	442	14-3-3zeta;Alh;aPKC;Atac3;baz;bic;BicC;Bka;bru1;Btk29A;bys;cact;CG10338;CG10341;CG11030;CG11180;CG11267;CG11555;CG11563;CG12325;CG12499;CG13096;CG13097;CG13366;CG14210;CG14230;CG1542;CG16812;CG1785;CG1789;CG18600;CG2004;CG2972;CG31381;CG31694;CG3224;CG32344;CG32816;CG33107;CG3335;CG34317;CG3744;CG43273;CG4554;CG5027;CG5114;CG5290;CG5728;CG6523;CG6664;CG6712;CG6767;CG6937;CG7339;CG7728;CG7839;CG78…
cisbp__M4666	3.39	0.00726			37	86	boi;brat;cad;CG10543;CG11486;CG15601;CG17724;CG32767;CG4408;CG5174;CG8184;chn;dbe;Dp1;dtn;E(Pc);fs(1)h;g;hang;heph;HnRNP-K;hoip;jing;mub;osa;ovo;rau;RpI1;Rrp45;Sap30;SF2;sima;spen;Sulf1;timeout;Tis11;Tsp96F
cisbp__M5927	3.38	0.00725	crp (inferredBy_Orthology).		1149	3610	140up;26-29-p;a;Abl;Acf;Acox57D-d;Acox57D-p;Ada2b;Adck;Adf1;Adgf-A;AdSS;Afti;AGO1;akirin;AlaRS-m;Alh;alph;alpha-Man-Ia;alpha-PheRS;Als2;alt;ana1;angel;AP-1gamma;AP-2sigma;APC10;Apc2;aPKC;app;Aprt;apt;ari-2;Arv1;asf1;ash2;AsnS;ast;Atac1;ATbp;Atg1;Atg17;Atg2;Atxn7;aurA;Aven;az2;B4;baz;bbx;bcn92;beg;Bem46;beta4GalNAcTA;beta4GalNAcTB;beta4GalT7;betaggt-I;betaggt-II;bgm;BicD;Bin1;Bka;Blos2;blp;boca;bo…
cisbp__M0674	3.37	0.00725		Dp; E2f1; E2f2 (inferredBy_MotifSimilarity_n_Orthology).	1344	4698	128up;14-3-3epsilon;14-3-3zeta;a;A16;Aatf;Abl;Acf;Ack-like;Acox57D-d;Ada;ADD1;Adf1;Aef1;Afti;AGO1;agt;Akap200;Akt1;Alh;alph;alpha-Cat;alpha-Man-Ia;alt;Amun;Ankle2;aop;AP-1gamma;AP-2alpha;AP-2mu;Apc;aPKC;app;Aprt;Aps;apt;aralar1;Arc42;Arf51F;ArfGAP1;ArgRS-m;Arl1;Arpc4;Art4;Arv1;ash1;Ask1;Atf-2;Atg1;Atg13;Atg14;Atg17;Atg18a;atms;Atu;Atx2;aurA;B4;babo;barc;baz;bbx;BCL7-like;bcn92;Bdbt;BEAF-32;ben;Be…
transfac_pro__M08193	3.33	0.0072			1113	3768	14-3-3epsilon;14-3-3zeta;a;A16;a6;Acox57D-d;Acph-1;Ada;AdenoK;Adgf-A;Adk2;Aef1;aft;Afti;ago;AGO1;AhcyL1;Akap200;akirin;Akt1;Alh;alph;alpha-Man-Ia;alpha-Man-Ib;alphaTub67C;alt;Amun;aop;AP-1gamma;AP-1sigma;AP-2alpha;aPKC;app;apt;Arf51F;arm;Arpc2;Arpc4;Art4;Asap;asp;Atg1;Atg10;Atg13;Atg17;Atg18a;Atg3;Atg5;Atu;Atx2;aux;Axn;B4;babo;baz;bc10;BCL7-like;bcn92;Bdbt;bel;ben;Best1;betaggt-II;betaTub56D;bic;…
cisbp__M0757	3.32	0.00719		CHES-1-like; bin; slp1 (inferredBy_MotifSimilarity).FoxK; FoxP; croc; fd102C; fd59A; fd64A; fkh; foxo (inferredBy_MotifSimilarity_n_Orthology).	275	947	a;AGO1;Akt1;Alh;aop;AP-1gamma;app;apt;arm;Atg17;Atu;BCL7-like;ben;betaTub56D;bip1;br;brat;bru1;Btk29A;Bx;CAHbeta;CanA-14F;capt;ced-6;cg;CG10543;CG10903;CG11486;CG11873;CG12054;CG12576;CG13366;CG13625;CG14073;CG1440;CG14478;CG15601;CG17233;CG17724;CG1888;CG2063;CG2162;CG2691;CG2747;CG2865;CG30105;CG31223;CG31224;CG3224;CG32767;CG32772;CG32803;CG3632;CG3645;CG3689;CG3808;CG3838;CG4022;CG42231;CG422…
jaspar__MA0233.1	3.31	0.00718			1241	4393	14-3-3epsilon;14-3-3zeta;26-29-p;a;A16;Aac11;Acox57D-d;Acph-1;Ada2b;Adat1;ADD1;AdenoK;Adgf-A;AdSS;Aef1;Afti;ago;AGO1;Akap200;akirin;Akt1;Alh;alpha-Man-IIb;alphaTub67C;Als2;alt;aop;AP-1gamma;AP-1sigma;AP-2alpha;aPKC;app;Aprt;Aps;apt;Archease;Arf51F;ArgRS-m;arm;Arp2;Arpc2;Arpc4;Art4;arx;Ask1;asl;asp;Atg1;Atg13;Atg17;Atg18a;Atg3;Atx2;aux;Axn;B4;babo;baz;bbx;bc10;BCL7-like;bcn92;Bdbt;BEAF-32;ben;Best…
cisbp__M0149	3.31	0.00718			893	3298	14-3-3epsilon;14-3-3zeta;a;Aatf;Abl;Abp1;Acox57D-d;Ada;AdenoK;Adgf-A;Adk2;AdSS;Aef1;aft;ago;AGO1;Ahcy;Akap200;akirin;Akt1;Alh;alph;aop;AP-1gamma;aPKC;app;Aprt;apt;aralar1;ArgRS-m;Arl1;arm;AspRS-m;ast;Atac3;Ate1;Atg1;Atg17;atms;B4;babo;bc10;BCL7-like;bcn92;be;beg;bel;ben;betaggt-I;bgm;bic;BicC;Bka;blot;blp;Bmcp;bon;br;brat;brm;bru1;BRWD3;bs;Bsg25D;BtbVII;Btk29A;bur;bves;Bx;bys;C1GalTA;cact;cad;Cad…
transfac_pro__M07040	3.31	0.00718			192	632	14-3-3epsilon;Abl;ago;Akap200;apt;Arf79F;Axn;B4;BCL7-like;br;brat;bru1;Bx;cad;CanA-14F;CG10492;CG10543;CG11030;CG11137;CG11486;CG12825;CG14621;CG14806;CG31688;CG32176;CG32767;CG34039;CG34461;CG3645;CG3655;CG3838;CG42238;CG42245;CG42258;CG42389;CG43658;CG43867;CG44838;CG5445;CG5953;CG6163;CG6175;CG6418;CG8786;CG8944;CG9005;CG9132;CG9425;CG9650;CG9821;chm;chn;cic;Cip4;ck;CkIIalpha-i1;cno;cpb;CrebB;…
taipale_tf_pairs__TFAP4_DLX3_NNCAGCTGNNNNTAATKR_HT	3.3	0.00717	crp (inferredBy_Orthology).		1475	4719	14-3-3zeta;140up;26-29-p;a;Abi;Abl;Acox57D-p;Ada;Ada2b;Adck;AdenoK;Adf1;Adgf-A;AdSS;Afti;AGO1;Ahcy;akirin;AlaRS-m;Alh;alien;alpha-Man-Ia;alpha-Man-IIb;alpha-PheRS;Als2;ana1;angel;aop;AP-2sigma;Apc;APC10;Apc2;aPKC;app;Aprt;Aps;apt;aralar1;Arf79F;ArgRS;ArgRS-m;ari-2;Arp1;Arv1;asf1;ash2;AsnS;Atac1;ATbp;Atg1;Atg17;Atg2;Atg4b;atms;Atxn7;aurA;Aven;Axn;az2;B4;babo;baz;bbx;bcn92;beag;beg;Bem46;Bet3;beta'…
cisbp__M1864	3.3	0.00717	croc (inferredBy_Orthology).		1178	4275	14-3-3epsilon;14-3-3zeta;26-29-p;5PtaseI;a;A16;Aac11;Aatf;Abl;Abp1;Acf;Ack-like;Acox57D-d;Ada;Aef1;Afti;ago;AGO1;agt;AhcyL1;AIMP2;Akap200;akirin;Akt1;AlaRS;Alg10;Alh;alph;alpha-Cat;alpha-Man-Ia;alpha-Man-IIb;Als2;AP-1gamma;AP-1sigma;AP-2alpha;Apc;aPKC;app;Aprt;Aps;apt;Archease;ArfGAP1;arm;Arp2;Arpc2;Arpc4;Art4;Asap;ash1;asp;Atg10;Atg13;Atg17;Atg3;Atg5;atms;Atu;aub;aux;Axn;B4;B52;babo;barc;baz;BCL…
cisbp__M1301	3.3	0.00717			227	781	a;Acox57D-d;Adgf-A;AGO1;Akap200;Akt1;Alh;aop;AP-1sigma;aPKC;Atg1;Atg17;ben;betaTub56D;BicD;br;brat;bru1;Bx;CAHbeta;CanA-14F;cg;CG10543;CG11396;CG11399;CG11964;CG13625;CG13689;CG14073;CG14478;CG15601;CG17233;CG17724;CG1824;CG1888;CG2162;CG2691;CG2865;CG30105;CG30377;CG30497;CG31224;CG31869;CG32767;CG32772;CG34401;CG42231;CG42245;CG42340;CG42389;CG43736;CG4455;CG44838;CG45050;CG4622;CG4872;CG4911;C…
cisbp__M0723	3.3	0.00717	slp1 (inferredBy_Orthology).	CHES-1-like; bin (inferredBy_MotifSimilarity).FoxK; FoxP; croc; fd102C; fd59A; fd64A; fkh; foxo (inferredBy_MotifSimilarity_n_Orthology).	323	1166	a;Acox57D-d;AGO1;Akap200;Akt1;Alh;aop;AP-1gamma;app;apt;arm;Atg17;Atu;babo;BCL7-like;betaTub56D;bip1;br;brat;bru1;Btk29A;Bx;ca;CAHbeta;CanA-14F;capt;ced-6;cg;CG10543;CG10903;CG11396;CG11399;CG11486;CG11873;CG12054;CG12576;CG13366;CG13625;CG13689;CG14073;CG1440;CG14478;CG15601;CG17233;CG17724;CG1815;CG1888;CG2063;CG2162;CG2691;CG2747;CG2865;CG30105;CG31223;CG31224;CG31869;CG3224;CG32767;CG32803;CG…
elemento__CCCTCCCC	3.29	0.00716			35	75	14-3-3epsilon;Arf79F;B4;brat;CG11137;CG18600;CG32767;CG3655;CG42245;CG6418;chn;CkIIalpha-i1;cpb;DCP2;E2f1;ens;fax;Gclm;hdc;heph;Indy;Jarid2;jing;lid;mahe;MEP-1;Mur2B;NFAT;ovo;pall;Prosap;Ptp61F;RhoGEF64C;S;sbb
transfac_pro__M04950	3.27	0.00713			892	3146	14-3-3epsilon;a;A16;Abl;Acox57D-d;Adf1;aft;ago;AGO1;Akap200;akirin;Akt1;Alh;alph;alpha-Man-Ia;Amun;aop;AP-1gamma;Aprt;apt;Arf79F;Arfrp1;ArgRS-m;Arl1;Art4;Asap;Ask1;ast;Atg1;atms;Atx2;Axn;Axud1;B4;B52;babo;barc;baz;BCL7-like;bcn92;BEAF-32;bel;ben;beta-PheRS;beta'COP;betaTub56D;bic;BicD;bif;bip1;blot;Bmcp;boi;bon;br;brat;Brf;brm;bru1;BRWD3;bs;Bsg25D;Btk29A;bves;Bx;Bx42;bys;CaBP1;cact;Cad74A;Cad87A;…
transfac_pro__M07319	3.26	0.00713	fd59A (inferredBy_Orthology).		195	655	14-3-3zeta;AGO1;Atx2;bbx;BCL7-like;br;brat;bru1;Bx;ca;CaBP1;cact;ced-6;CG10543;CG1129;CG11486;CG13625;CG13689;CG14073;CG1440;CG14478;CG1888;CG2865;CG31869;CG32767;CG32772;CG33298;CG34401;CG3631;CG42258;CG43736;CG45050;CG4911;CG5174;CG5541;CG5934;CG5953;CG6191;CG6613;CG6767;CG8281;CG8303;CG9005;CG9650;CG9821;cher;cic;cindr;Cip4;cpb;Crag;CrebB;crol;crp;Crtc;Csk;csw;ctrip;CycG;Cyp6u1;dco;dnt;Dp1;dpr…
transfac_public__M00071	3.26	0.00712			90	267	Abl;Ada2b;akirin;boca;Btk29A;Bx;Ccs;CdGAPr;CG11180;CG11486;CG11576;CG11771;CG11873;CG30497;CG32066;CG32816;CG42238;CG42389;CG42668;CG5969;CG7339;CG8032;CG8399;CG9636;cN-IIIB;corto;ctrip;Dab;Dl;dpr6;Drak;E2f1;Eip63E;emc;FAM21;FeCH;Fem-1;gpp;hdc;heph;hng3;HnRNP-K;isoQC;jigr1;kat80;kibra;kuz;l(2)k09913;lilli;LpR2;MED25;MetRS-m;Mi-2;Mnt;mRpL32;msi;mub;MYPT-75D;NaPi-III;NAT1;neur;Npc2e;nudE;Oamb;ocm;O…
transfac_pro__M04866	3.25	0.00712	HDAC1 (inferredBy_Orthology).		279	955	14-3-3epsilon;a;Acox57D-d;Ada;Adf1;AGO1;akirin;Alh;alph;aop;apt;ArgRS-m;ast;baz;bcn92;blot;bon;br;brat;Brf;bru1;bs;Btk29A;Bx;CanA-14F;cav;Cbl;Cbp80;Cf2;CG10420;CG10543;CG10949;CG10960;CG11030;CG11486;CG11873;CG12880;CG12895;CG13366;CG13625;CG14820;CG15601;CG1620;CG1671;CG17327;CG17724;CG17977;CG1888;CG1910;CG2063;CG2116;CG31195;CG32365;CG32428;CG32767;CG32772;CG32816;CG33635;CG34401;CG3638;CG4041…
cisbp__M3155	3.25	0.00712			91	271	Abl;Ada2b;akirin;boca;Btk29A;Bx;Ccs;CdGAPr;CG10283;CG11180;CG11486;CG11576;CG11771;CG11873;CG30497;CG32066;CG32816;CG42238;CG42389;CG42668;CG5969;CG7339;CG8032;CG8399;CG9636;cN-IIIB;corto;ctrip;Dab;Dl;dpr6;Drak;E2f1;Eip63E;emc;FAM21;FeCH;Fem-1;gpp;hdc;heph;hng3;HnRNP-K;isoQC;jigr1;kat80;kibra;kuz;l(2)k09913;lilli;LpR2;MED25;MetRS-m;Mi-2;Mnt;mRpL32;msi;mub;MYPT-75D;NaPi-III;NAT1;neur;Npc2e;nudE;Oa…
taipale__TFAP4_full_AWCAGCTGWT	3.24	0.00711	crp (inferredBy_Orthology).		1178	3739	140up;26-29-p;a;Abl;Acf;Acox57D-d;Acox57D-p;Ada2b;Adck;Adf1;Adgf-A;AdSS;Afti;AGO1;akirin;AlaRS-m;Alh;alph;alpha-Man-Ia;alpha-PheRS;Als2;alt;ana1;angel;AP-1gamma;AP-2sigma;APC10;Apc2;aPKC;app;Aprt;apt;ari-2;Arv1;asf1;ash2;AsnS;ast;Atac1;ATbp;Atg1;Atg17;Atg2;atms;Atxn7;aurA;Aven;az2;B4;baz;bbx;bcn92;beg;Bem46;beta4GalNAcTA;beta4GalNAcTB;betaggt-I;betaggt-II;bgm;BicD;Bin1;Bka;Blos2;blp;boca;boi;bon;…
jaspar__MA0528.1	3.24	0.00711		Dif; dl (inferredBy_MotifSimilarity_n_Orthology).	180	595	14-3-3epsilon;Abl;Aef1;Akap200;Alh;aop;apt;Arf79F;BCL7-like;boi;br;brat;bru1;Bx;cad;ced-6;Cf2;CG10428;CG10543;CG11030;CG11137;CG1129;CG11873;CG13366;CG13689;CG1440;CG14434;CG15601;CG1824;CG1888;CG3008;CG30101;CG30105;CG31224;CG31869;CG31935;CG32066;CG32767;CG32772;CG34461;CG3638;CG3655;CG42238;CG42389;CG43658;CG43867;CG44838;CG4768;CG5174;CG5953;CG6163;CG6568;CG7990;CG8180;CG8184;CG8207;CG8786;CG…
cisbp__M0718	3.24	0.0071	FoxK (inferredBy_Orthology).	CHES-1-like; bin; slp1 (inferredBy_MotifSimilarity).FoxP; croc; fd102C; fd59A; fd64A; fkh; foxo (inferredBy_MotifSimilarity_n_Orthology).	263	922	a;AdSS;AGO1;Akt1;Alh;aop;AP-1gamma;app;apt;arm;Atg17;Atu;babo;BCL7-like;betaTub56D;br;brat;bru1;Btk29A;Bx;ca;CAHbeta;CanA-14F;capt;Cdk8;ced-6;cg;CG10543;CG10903;CG11396;CG11399;CG11486;CG11873;CG12054;CG13004;CG13625;CG14073;CG14478;CG15601;CG17233;CG17724;CG1888;CG2063;CG2162;CG2747;CG2865;CG30105;CG31223;CG31224;CG3224;CG32767;CG32772;CG32803;CG33298;CG3632;CG3645;CG3689;CG3808;CG3838;CG4022;CG…
elemento__CCTCCCTC	3.21	0.00708			51	145	AGO1;apt;Arf79F;brat;Btk29A;CG11137;CG11486;CG11873;CG32767;CG5953;CG6163;CG6678;CG9005;CG9132;chn;cpb;dap;Dys;Eip63E;fz;g;Gprk2;gukh;HDAC4;hdc;kel;lola;Mi-2;msk;N;osa;ovo;Pak3;pbl;PNPase;pnut;Prosap;qkr54B;RhoGAP19D;RhoGEF64C;sbb;sdk;sima;Sin3A;SKIP;spoon;Src42A;stx;Su(Tpl);T48;wap
cisbp__M0679	3.2	0.00706		Dp; E2f1; E2f2 (inferredBy_MotifSimilarity_n_Orthology).	996	3393	128up;14-3-3epsilon;A16;Aatf;Abl;Acf;Acox57D-d;ADD1;Adf1;Aef1;AGO1;agt;Akap200;Akt1;Alh;alph;alpha-Man-Ia;aop;AP-1gamma;AP-2mu;aPKC;app;Aprt;apt;aralar1;Arc42;Arf51F;ArgRS-m;Arl1;Arpc4;Art4;ash1;Ask1;Atg18a;atms;Atu;Atx2;aurA;B4;babo;barc;baz;BCL7-like;bcn92;Bdbt;BEAF-32;Bet3;beta-PheRS;beta4GalT7;bic;BicC;bip1;blot;boi;bon;bora;br;Br140;brat;Bre1;Brf;brm;bru1;bs;BtbVII;Btk29A;btz;BubR1;bur;bves;…
cisbp__M0068	3.2	0.00706			1236	4234	14-3-3zeta;26-29-p;a;A16;Aatf;Ack-like;Acox57D-d;Ada;Adat1;Adf1;Aef1;Afti;ago;AGO1;agt;AhcyL1;Akap200;akirin;Akt1;Alh;alph;alpha4GT1;alt;amx;aop;AOX3;AP-1gamma;AP-1sigma;AP-2alpha;Apc;app;apt;Arf79F;ArfGAP1;Arfrp1;arm;Arpc2;Art1;Art4;Asap;Asciz;ash1;Ask1;AspRS-m;Atg10;Atg13;Atg17;Atg18a;Atg3;Atg4a;atms;Atu;Atx2;aurA;aux;Axn;B4;B52;babo;barc;bbx;BCL7-like;bcn92;Bdbt;be;BEAF-32;bel;ben;Best1;beta'C…
tfdimers__MD00511	3.19	0.00705			508	1693	14-3-3epsilon;Abl;Acox57D-d;aft;AGO1;Akap200;akirin;Akt1;Alh;alph;alt;aop;AP-1gamma;aPKC;app;apt;ari-2;arm;Art4;ast;Atg17;Atu;B4;babo;barc;bbx;be;ben;BicD;bif;boi;bon;br;Br140;brat;bru1;bs;Bx;c11.1;cact;Cad87A;Cad99C;CanA-14F;capt;CBP;Cda4;Cdc42;CdGAPr;ced-6;cert;Cf2;cg;CG10466;CG10543;CG10898;CG10960;CG11164;CG11263;CG11486;CG11563;CG11566;CG11873;CG12054;CG12112;CG12702;CG12880;CG13366;CG13397;…
homer__AAAAATACCRMA_Unknown4	3.19	0.00705			1561	4991	14-3-3epsilon;14-3-3zeta;312;a;A16;a6;Aatf;Abi;Abl;Abp1;abs;Ack-like;Acph-1;Ada;Ada2b;Ada3;AdSL;ago;AGO1;agt;AhcyL1;Akap200;akirin;Akt1;Alg10;Alh;alien;alph;alpha-Man-IIb;Als2;alt;Amun;ana1;ana3;AP-1gamma;AP-2alpha;AP-2mu;APC10;Apf;aPKC;app;Aps;apt;Arc42;Archease;Arf51F;Arfip;ArgRS-m;ari-2;arm;Arp1;Arp6;Arpc2;Arpc4;Art1;Art3;Art4;Arv1;Asap;Ask1;AsnRS;ast;Atf-2;Atg1;Atg10;Atg13;Atg18a;Atg3;atms;At…
elemento__AACAGCTG	3.18	0.00703		HLH54F (inferredBy_MotifSimilarity_n_Orthology).	1063	3486	140up;26-29-p;a;Abl;Acf;Acox57D-d;Acox57D-p;Ada2b;Adck;Adf1;Adgf-A;AdSS;Afti;AGO1;Akap200;akirin;Akt1;AlaRS-m;Alh;alph;alpha-Man-Ia;alpha-PheRS;Als2;ana1;angel;AP-1gamma;AP-2sigma;APC10;Apc2;aPKC;app;Aprt;apt;ArgRS-m;ari-2;asf1;ast;ATbp;Atg1;Atg17;Atg2;Atxn7;aurA;Aven;az2;B4;baz;bbx;bcn92;beg;ben;beta-PheRS;beta'COP;beta4GalNAcTB;beta4GalT7;betaggt-I;betaggt-II;bgm;BicD;bif;bip1;Bka;Blos2;blot;bl…
transfac_pro__M05471	3.17	0.00703			41	109	14-3-3epsilon;app;boi;bru1;cg;CG13551;CG13625;CG32767;CG43867;CG5033;CG6966;CG7185;CG7650;CG9926;CkIIalpha-i1;DCP2;Dhit;dpr6;Eip63E;fax;fra;Gprk2;HDAC1;hdc;heph;HnRNP-K;Mi-2;ovo;PNPase;RhoGAP71E;RhoU;RpL27A;scyl;sima;sll;ssh;Su(Tpl);tral;ush;z;zld
cisbp__M5926	3.17	0.00703	crp (inferredBy_Orthology).		1125	3548	140up;26-29-p;a;Abl;Acf;Acox57D-d;Acox57D-p;Ada2b;Adck;Adf1;Adgf-A;AdSS;Afti;AGO1;akirin;AlaRS-m;Alh;alph;alpha-Man-Ia;alpha-PheRS;Als2;alt;ana1;angel;AP-1gamma;AP-2sigma;APC10;Apc2;aPKC;app;Aprt;apt;ari-2;Arv1;asf1;ash2;AsnS;Atac1;ATbp;Atg1;Atg17;Atg2;Atxn7;aurA;Aven;az2;B4;baz;bbx;bcn92;beg;Bem46;beta4GalNAcTA;beta4GalNAcTB;betaggt-I;betaggt-II;bgm;BicD;Bin1;Bka;Blos2;blp;boca;boi;bon;bonsai;br…
taipale__E2F7_DBD_TTTTCCCGCCAAAW_repr	3.17	0.00702		E2f2 (inferredBy_MotifSimilarity_n_Orthology).	1314	4985	128up;312;a;Aac11;Abl;abs;Ack-like;Acox57D-d;Acox57D-p;Acph-1;Ada3;Adf1;AdSS;Aef1;AGO1;agt;AIMP2;Akap200;Akt1;AlaRS;Alh;alph;alpha-Man-Ia;Als2;aop;Aos1;AOX3;Apc;APC7;ApepP;app;Aps;arm;Arp10;Arp6;Art1;Art8;asf1;ash2;AsnRS;Atg1;Atg3;Atg5;atms;aurA;aux;Axn;B4;B52;baz;BCL7-like;be;BEAF-32;ben;Best1;beta4GalNAcTB;betaggt-II;bic;BicC;BicD;Bin1;bin3;bip1;blot;Bmcp;bmm;boi;br;Br140;brat;Brf;brm;Brms1;bru…
swissregulon__sacCer__NHP6A	3.16	0.00702			646	2215	14-3-3epsilon;14-3-3zeta;Abl;Acn;Acox57D-d;Ada;AdSS;aft;AGO1;AhcyL1;Akap200;akirin;Akt1;Alh;alpha-Man-Ia;Amun;aop;AP-1gamma;AP-2alpha;Apc;app;apt;Arf51F;ArfGAP3;Arp10;Art4;Atg1;Atg13;Atg17;Atg3;Atg4a;Atu;B4;babo;Bap111;barc;baz;BCL7-like;bcn92;Bdbt;bel;bic;BicC;bin3;bip1;br;brat;Brf;bru1;BRWD3;bs;BtbVII;BthD;Btk29A;Bx;cact;cad;Cad87A;CanA-14F;Cbl;Cbp80;Cdc42;CdGAPr;CDK2AP1;Cdk8;cdm;Cf2;cg;CG10492…
swissregulon__hs__FOXN1.p2	3.16	0.00702	jumu (inferredBy_Orthology).		80	223	a;Akap200;Atg5;barr;betaTub56D;br;Btk29A;Bx;ca;Cad74A;Cad87A;CG13603;CG17002;CG18065;CG2218;CG30159;CG30183;CG42389;CG42684;CG43736;CG4452;CG4622;CG5521;CG5986;CG6678;CG7011;CG9650;cic;Cip4;ck;Cks30A;crp;Cyp6v1;dom;Dsp1;FoxK;fra;ftz-f1;GlyRS;heph;Hip14;Hrb27C;hts;Irk1;mam;mod(mdg4);mri;mRpL43;msi;Mur2B;ncd;Pabp2;pav;Pdcd4;plum;Pngl;PNUTS;pre-mod(mdg4)-AD;pre-mod(mdg4)-U;pre-mod(mdg4)-V;pre-mod(md…
transfac_pro__M07856	3.16	0.00701	BtbVII (directAnnotation).		637	2223	14-3-3zeta;26-29-p;Aatf;Ack-like;Ada;AdenoK;Adk2;AdSS;aft;AGO1;AhcyL1;Akt1;Alh;alph;alpha-Man-IIb;aop;AP-1gamma;AP-2alpha;Apc;aPKC;apt;Atg1;Atg13;Atg4b;Atg5;Atu;aux;Axn;B4;B52;babo;bel;beta4GalNAcTA;beta4GalT7;betaTub56D;bic;bip1;blot;bmm;bon;br;brat;Brf;bru1;bs;BtbVII;Btk29A;Bx;c12.2;C1GalTA;cact;cad;Cad87A;Cad99C;CanA-14F;Capr;cav;Cbl;Cda4;CdGAPr;ced-6;CenB1A;cert;Cf2;cg;CG10462;CG10543;CG10889…
cisbp__M2041	3.16	0.00701	mirr (directAnnotation).		1379	4934	14-3-3epsilon;14-3-3zeta;26-29-p;a;A16;Aac11;Aatf;Abl;Acox57D-d;Acph-1;Ada2b;Adat1;Adck;ADD1;AdenoK;Adgf-A;AdSS;Aef1;Afti;ago;AGO1;Akap200;akirin;Akt1;Alh;alpha-Man-IIb;alphaTub67C;Als2;alt;aop;AP-1gamma;AP-1mu;AP-1sigma;AP-2alpha;aph-1;aPKC;app;Aprt;Aps;apt;aralar1;Archease;Arf51F;Arfrp1;ArgRS-m;arm;Arp2;Arpc2;Arpc4;Art4;arx;Asap;Ask1;asl;asp;ast;Atg1;Atg13;Atg17;Atg18a;Atg3;Atg7;Atx2;aux;Axn;B4…
cisbp__M0066	3.15	0.00701			1119	3463	14-3-3epsilon;14-3-3zeta;4E-T;A16;Aatf;Abl;Abp1;Ack-like;Acn;Acox57D-d;Acph-1;Ada;AdSS;Aef1;aft;AGO1;AhcyL1;Akap200;akirin;Akt1;Alh;alph;alpha-Man-Ia;Amun;aop;AP-1gamma;AP-1sigma;AP-2alpha;AP-2mu;Apc;aPKC;app;apt;Arf51F;ArfGAP3;Arfip;Arp10;Arp2;Arp3;Art4;Asap;ash2;asp;ATbp;Atg1;Atg13;Atg17;Atg3;Atg4a;Atg5;atms;Atu;Atx2;Axn;B4;babo;Bap111;barc;baz;bbx;bc10;BCL7-like;bcn92;Bdbt;BEAF-32;bel;ben;beta…
tfdimers__MD00418	3.14	0.007	MTF-1 (inferredBy_Orthology).		65	189	14-3-3epsilon;ago;app;Aprt;brat;bru1;CaBP1;CG10543;CG1354;CG13689;CG32732;CG32767;CG3655;CG43736;CG43867;CG6163;CG8786;CG9650;chn;Cip4;CkIIalpha-i1;cpb;crq;DCP2;Dhit;dpr6;EcR;emc;fax;for;fra;fs(1)h;Fur1;Glut1;Gprk2;hb;HDAC4;hdc;heph;hll;hng3;jing;mei-P26;Mur2B;N;ovo;pav;Pde11;PNPase;psq;Ptp61F;px;RhoGAP19D;RhoGEF64C;sbb;Sema1a;sim;Sse;stx;Tlk;ttk;UbcE2H;ush;wts;zld
cisbp__M0165	3.14	0.00699			768	2873	14-3-3zeta;a;Aatf;Abl;Acox57D-d;Ada;AdenoK;Adgf-A;AdSS;Aef1;aft;ago;AGO1;Ahcy;Akap200;akirin;Akt1;Alh;alph;alpha-Man-Ia;aop;AP-1sigma;aPKC;app;Aprt;apt;aralar1;Arf79F;ArfGAP1;ArgRS-m;arm;ast;Ate1;Atg1;Atg17;atms;B4;BCL7-like;bcn92;be;beg;bel;ben;bic;Bka;blot;bon;br;brat;bru1;BRWD3;bs;Bsg25D;Btk29A;bur;bves;Bx;bys;C1GalTA;cad;Cad74A;Cad87A;Cad99C;CanA-14F;CBP;CdGAPr;Cenp-C;Cf2;cg;CG10254;CG10265;C…
scertf__zhu.NHP6A	3.14	0.00699			668	2302	14-3-3epsilon;14-3-3zeta;Abl;Acn;Acox57D-d;Ada;AdSS;aft;AGO1;AhcyL1;Akap200;akirin;Akt1;Alh;alpha-Man-Ia;Amun;aop;AP-1gamma;AP-2alpha;Apc;app;apt;Arf51F;ArfGAP3;Arp10;Art4;ash2;Atg1;Atg13;Atg17;Atg3;Atg4a;Atu;B4;babo;Bap111;barc;baz;BCL7-like;bcn92;Bdbt;bel;bic;BicC;bin3;bip1;br;brat;Brf;bru1;BRWD3;bs;BtbVII;BthD;Btk29A;Bx;cact;cad;Cad87A;CanA-14F;Cbl;Cbp80;Cdc42;CdGAPr;CDK2AP1;Cdk8;cdm;Cf2;cg;CG…
transfac_pro__M01175	3.14	0.00699			70	201	14-3-3epsilon;Acox57D-d;Arf79F;B4;ben;boi;brat;cg;CG10492;CG11137;CG13625;CG14621;CG32732;CG32767;CG3655;CG3744;CG42245;CG42340;CG42724;CG6418;CG9425;CG9650;CkIIalpha-i1;cpb;DCP2;dlp;Eip63E;fax;fra;fs(1)h;Glut1;HDAC4;hdc;heph;HnRNP-K;jing;kibra;lid;mahe;Map205;mei-P26;Meltrin;MEP-1;mod;mRpL40;Mrtf;mts;mub;Mur2B;nej;nocte;ovo;psq;Ptp61F;qkr54B;Rab8;RhoGAPp190;RhoGEF64C;S;sbb;SKIP;smg;spg;Tab2;Tlk;…
predrem__nrMotif215	3.13	0.00699			23	48	apt;br;CG1103;CG11906;CG33298;CG4452;CG5044;CG8379;Dhit;H;hts;hyx;ldlCp;Mad;Mkk4;Mur2B;neur;Opa1;Pak;pyd;SKIP;Tmhs;unk
swissregulon__sacCer__SPT15	3.13	0.00698	Tbp; Trf; Trf2 (inferredBy_Orthology).		1209	4002	14-3-3epsilon;14-3-3zeta;4E-T;a;A16;Abl;Abp1;Ack-like;Acn;Acox57D-d;Acph-1;Ada;Adf1;Adgf-A;AdSS;aft;Afti;AGO1;agt;AhcyL1;Akap200;akirin;Akt1;Alh;alph;alpha-Man-Ia;alt;Amun;aop;AP-1gamma;AP-1sigma;AP-2alpha;AP-2mu;Apc;aPKC;app;apt;Arf51F;ArfGAP3;Arp10;Arp3;Art4;Asap;ash2;asp;ATbp;Atg1;Atg13;Atg17;Atg18a;Atg3;Atg4a;Atg4b;Atg5;atms;Atu;aux;B4;B52;babo;Bap111;barc;baz;bbx;bc10;BCL7-like;bcn92;Bdbt;BE…
hocomoco__FOXG1_HUMAN.H10MO.D	3.12	0.00697	slp1 (inferredBy_Orthology).	CHES-1-like; fd59A (inferredBy_MotifSimilarity).FoxP; croc; fd64A (inferredBy_MotifSimilarity_n_Orthology).	259	791	14-3-3zeta;Abl;Acox57D-d;AGO1;Akt1;Alh;aop;AP-1gamma;aPKC;app;Aps;arm;Atg18a;Atg4a;BCL7-like;bcn92;ben;boi;br;brat;bru1;BtbVII;bves;Bx;ca;Cad74A;CanA-14F;ced-6;cg;CG10543;CG1129;CG11396;CG11399;CG11486;CG12054;CG12702;CG13397;CG13484;CG14073;CG14435;CG14478;CG15601;CG17724;CG1888;CG2790;CG2865;CG31224;CG31869;CG32066;CG32758;CG32767;CG32772;CG32803;CG33298;CG34401;CG3632;CG3689;CG4022;CG42231;CG4…
elemento__CTCCTCCC	3.12	0.00697			35	89	brat;cad;CG11486;CG11555;CG17078;CG32767;CG3655;CG5033;chn;cic;Cip4;Dhit;g;hdc;hep;hoip;klar;lola;Mad;Mnt;obe;ovo;Prosap;r-l;Rab10;rau;RNaseX25;SF2;Socs16D;spen;Sulf1;sw;Tsp96F;Unr;wech
cisbp__M0750	3.11	0.00697	FoxP (inferredBy_Orthology).	CHES-1-like; bin; slp1 (inferredBy_MotifSimilarity).FoxK; bs; croc; fd59A; fd64A; fd96Ca; fd96Cb; fkh; foxo (inferredBy_MotifSimilarity_n_Orthology).	64	185	Alh;arm;betaTub56D;brat;Bx;ca;cg;CG14478;CG1888;CG32767;CG32803;CG3808;CG42389;CG45050;CG4911;CG5180;CG5800;CG5953;CG8026;Cip4;cpb;Dsp1;Etf-QO;fax;fl(2)d;flfl;FoxK;Fur2;Gclm;HPS4;inc;kuz;larp;lola;mahe;mei-P26;Mi-2;mnb;mRpL1;mRpL2;mthl1;mub;Myc;NAT1;ovo;Pdk1;pes;plum;Psc;Rbcn-3A;Rgl;RhoGAPp190;robl;rogdi;Sema1b;Sin3A;skd;sqd;Su(Tpl);Sxl;Unr;ush;Vps16B;wap
transfac_pro__M03121	3.11	0.00697		amos (inferredBy_MotifSimilarity).	549	2014	26-29-p;a;Abl;Acox57D-d;Acox57D-p;AdSS;Afti;AGO1;akirin;AlaRS-m;Alh;alph;alpha-Man-Ia;Als2;AP-2sigma;Apc2;app;apt;ArgRS-m;ari-2;Atg1;Atg13;Atg17;Atg2;atms;aurA;Aven;az2;B4;Best1;betaTub56D;bif;blp;boca;bon;bonsai;brat;Brf;bru1;bs;Btk29A;cact;Caf1-180;CanA-14F;capt;cbs;Ccdc56;Ccs;Cda4;Cdc16;CDC45L;Cdc5;Cdc6;Cdk9;CG10050;CG10053;CG10075;CG10098;CG10166;CG10283;CG10366;CG10638;CG10669;CG10898;CG1090…
neph__UW.Motif.0335	3.11	0.00697			41	109	Amun;brat;CG14969;CG30122;CG31869;CG32816;CG3407;chn;dtn;Eip63E;Exo84;Fem-1;fend;for;glec;gro;hdc;hts;InR;kibra;larp;mub;nej;osp;Ost48;Pitslre;Prosap;pyd;Ras85D;rdx;Reph;rump;sau;sbb;Sec24CD;Sulf1;Tab2;timeout;Tl;Unr;zfh1
predrem__nrMotif119	3.11	0.00696			1006	3539	140up;26-29-p;a;A16;Abl;Acox57D-d;Acox57D-p;Ada;Adck;Adf1;AdSS;Afti;AGO1;AhcyL1;akirin;AlaRS-m;Alh;alph;alpha-Man-Ia;alpha-Man-IIb;Als2;alt;Amun;ana3;AP-2sigma;APC10;Apc2;aPKC;app;Aprt;apt;ari-2;asf1;AsnS;asrij;ast;ATbp;Atg1;Atg13;Atg17;Atg2;aurA;Aven;az2;B4;babo;bbx;beg;Bem46;beta4GalNAcTB;betaggt-I;betaggt-II;bif;Bka;blp;boca;bon;bonsai;brat;Brf;bru1;bs;BtbVII;Btk29A;Btnd;Bx;cad;Cad87A;calypso;…
taipale__TFAP4_DBD_AWCAGCTGWT	3.1	0.00695	crp (inferredBy_Orthology).		1116	3506	140up;26-29-p;a;Abl;Acf;Acox57D-d;Acox57D-p;Ada2b;Adck;Adf1;Adgf-A;AdSS;Afti;AGO1;akirin;AlaRS-m;Alh;alph;alpha-Man-Ia;alpha-PheRS;Als2;alt;ana1;angel;AP-1gamma;AP-2sigma;APC10;Apc2;aPKC;app;Aprt;apt;ari-2;Arv1;asf1;ash2;AsnS;Atac1;Atg1;Atg17;Atg2;Atxn7;aurA;Aven;az2;B4;baz;bbx;bcn92;beg;Bem46;beta4GalNAcTA;beta4GalNAcTB;betaggt-I;betaggt-II;bgm;BicD;Bka;Blos2;blp;boca;boi;bon;bonsai;brat;Brf;Brm…
transfac_pro__M06125	3.1	0.00695			89	267	AGO1;Akap200;Arf79F;Atg17;bic;brat;bru1;cad;Cad88C;CG10543;CG11137;CG11164;CG11436;CG11456;CG11486;CG14621;CG1824;CG2614;CG32767;CG32816;CG3655;CG42245;CG42258;CG42340;CG42684;CG4975;CG5953;CG5969;CG9663;chn;cic;Cip4;cno;conv;dlp;E(Pc);Eip63E;enc;Fur1;g;Glut1;HDAC4;hdc;heph;hoip;isoQC;jing;jvl;kibra;klar;Lac;lola;mahe;mam;MEP-1;Mipp2;MYPT-75D;N;NFAT;obe;osa;ovo;pod1;Prosap;psq;px;Rab10;raptor;rau…
jaspar__MA0123.1	3.1	0.00695			272	995	14-3-3epsilon;ago;Akt1;alt;aop;app;apt;Atg5;aurA;B4;B52;babo;beta-PheRS;bic;bip1;br;brat;bru1;bs;BtbVII;Btk29A;CanA-14F;Cbl;CdGAPr;Cf2;cg;CG10005;CG10283;CG10585;CG11030;CG11403;CG12213;CG12895;CG13366;CG13766;CG14073;CG14435;CG14442;CG14478;CG14764;CG1529;CG1532;CG17977;CG2865;CG3008;CG30497;CG31195;CG31688;CG31759;CG32152;CG32767;CG32772;CG3358;CG34401;CG3645;CG3689;CG3919;CG4022;CG42238;CG4225…
swissregulon__sacCer__RSC3	3.09	0.00694			1151	3967	14-3-3epsilon;14-3-3zeta;a;Aatf;Abl;Acf;Acox57D-d;Ada;Ada3;ADD1;Adf1;Aef1;Afti;AGO1;Akap200;akirin;Alh;alph;alpha-Cat;alpha-Man-Ia;alt;Amun;aop;AP-1gamma;AP-2mu;aPKC;app;Aprt;Aps;apt;aralar1;Arc42;Arf51F;ArfGAP1;ArgRS-m;arm;Art4;asf1;ash1;Ask1;asrij;ast;Atf-2;Atg1;Atg10;Atg17;atms;Atu;Atx2;aurA;aux;B4;babo;Bap170;baz;bbx;BCL7-like;bcn92;Best1;beta-PheRS;beta4GalT7;bic;BicC;bif;bip1;blot;Bmcp;boca…
hocomoco__FUBP1_HUMAN.H10MO.D	3.09	0.00694	Psi (inferredBy_Orthology).		477	1647	14-3-3epsilon;14-3-3zeta;a;Acox57D-d;AGO1;AhcyL1;Akt1;Alh;alpha-Man-IIb;Amun;aop;AP-1gamma;app;Aprt;Aps;apt;arm;Arp2;Arpc2;ast;Atg17;Atx2;babo;baz;bbx;BCL7-like;ben;beta4GalT7;BicD;Bmcp;boi;bon;br;brat;Brf;bru1;bs;Btk29A;Bx;bys;CaBP1;cact;Cad74A;Cad87A;CAHbeta;CanA-14F;Cdc42;ced-6;Cf2;cg;CG10543;CG10702;CG10939;CG10960;CG11279;CG1129;CG11486;CG11873;CG11964;CG12173;CG12576;CG12825;CG13004;CG13366…
cisbp__M5362	3.08	0.00693		E2f2 (inferredBy_MotifSimilarity_n_Orthology).	49	136	14-3-3epsilon;a;Art1;BicC;BicD;bru1;bs;CG13625;CG2990;CG3838;CG42455;CG5789;CG8067;CG8184;CG8191;cic;clos;Ctf4;cutlet;dap;Dhc64C;DNApol-alpha180;DNApol-alpha73;dpa;dpr6;Dsp1;esc;glec;hdc;LeuRS-m;lola;mago;Map60;Mcm3;Mcm5;Mcm7;Nup43;Pfdn6;RnrS;Sema1a;Sesn;Sgt;Sin3A;Su(z)12;TfIIS;Tl;ttv;ush;WRNexo
stark__RCGYRCGY	3.08	0.00693			1385	4787	14-3-3epsilon;14-3-3zeta;5PtaseI;a;A16;Aatf;Abi;Abl;Acf;Acox57D-d;Ada;Ada3;Adf1;Adk2;Aef1;Afti;ago;AGO1;Akap200;akirin;Akt1;Alh;alph;alpha-Cat;alpha-Man-Ia;alpha-Man-IIb;alt;Amun;aop;AP-1gamma;AP-2alpha;AP-2mu;Apc;aPKC;app;Aprt;apt;aralar1;Arc42;Arf51F;Arf79F;ArfGAP1;Arfrp1;ArgRS-m;Arl1;Arl4;arm;Arp2;Art4;Ask1;asp;ast;Atg1;Atg10;Atg17;Atg18a;atms;Atu;Atx2;Axn;B4;B52;babo;barc;baz;bbx;BCL7-like;bc…
cisbp__M0029	3.07	0.00692			47	125	14-3-3epsilon;14-3-3zeta;babo;Cf2;cg;CG14442;CG3008;CG31688;CG43386;CG4911;CG5611;CG5746;CG6454;CG8031;Cht6;Cip4;crol;CtBP;CycG;dom;Dp1;E(Pc);eco;fax;Fmr1;Hrb27C;kis;lark;loco;mam;mRpL45;Mtl;mub;Myc;nej;nito;psq;Ptp61F;Rfx;RpL6;Sema1a;Sep5;sqd;Src64B;Tgi;Vha55;Xpd
c2h2_zfs__M0404	3.07	0.00692			600	1932	14-3-3epsilon;14-3-3zeta;a;Abl;Acox57D-d;Adgf-A;Aef1;ago;AGO1;Akap200;akirin;Akt1;Alh;alph;alpha-Man-Ia;Amun;aop;AP-1gamma;AP-1sigma;aPKC;app;apt;Arf79F;ArgRS-m;ari-2;Arl5;arm;Arpc2;AspRS-m;ast;Atg1;Atg17;Axud1;B4;barc;bbx;BCL7-like;bcn92;bel;ben;beta-PheRS;BicD;boi;bon;br;Br140;brat;bru1;bs;Bx;c11.1;cact;Cad87A;CAHbeta;CanA-14F;capt;Cda4;Cdc42;CdGAPr;ced-6;Cf2;cg;CG10139;CG10366;CG10466;CG10543;…
transfac_pro__M00713	3.07	0.00692	Tbp; Trf; Trf2 (inferredBy_Orthology).		657	2152	14-3-3epsilon;14-3-3zeta;a;Abl;Acn;Acox57D-d;Ada;AdSS;aft;Afti;AGO1;AhcyL1;Akap200;Akt1;Alh;alpha-Man-Ia;alt;Amun;AP-1gamma;Apc;aPKC;app;apt;Arf51F;ArfGAP3;Art4;ash2;Atg1;Atg13;Atg17;Atg3;Atg4a;Atu;B4;B52;babo;Bap111;barc;baz;BCL7-like;bcn92;bel;beta-PheRS;betaggt-I;betaTub56D;bif;bin3;bip1;bon;br;brat;Brf;bru1;BRWD3;bs;BtbVII;Btk29A;bves;Bx;cact;cad;Cad87A;CanA-14F;caz;Cbl;Cbp80;Cda4;Cdc42;CdGAP…
tfdimers__MD00332	3.07	0.00692	Pur-alpha (inferredBy_Orthology).		69	206	14-3-3epsilon;boi;brat;bru1;Bx;Cad87A;CanA-14F;CG10543;CG11030;CG11486;CG13689;CG17724;CG32732;CG32767;CG32772;CG3655;CG42238;CG42245;CG42724;CG43867;CG5174;CG5953;CG6163;chn;crol;Dhit;dlt;Dp1;EcR;emc;fax;fl(2)d;fs(1)h;Glut1;Gprk2;hdc;heph;hng3;jing;kibra;mahe;mei-P26;MEP-1;Mi-2;msi;msn;mub;Mur2B;N;osa;ovo;Pde11;Pitslre;Prosap;psq;px;Rca1;rdx;RhoGEF64C;sbb;SKIP;sqd;Sse;stx;Su(Tpl);Tis11;Tsp96F;un…
cisbp__M6251	3.07	0.00691	Psi (inferredBy_Orthology).		486	1679	14-3-3epsilon;14-3-3zeta;a;Acox57D-d;AGO1;AhcyL1;Akt1;Alh;alpha-Man-IIb;Amun;aop;AP-1gamma;app;Aprt;Aps;apt;arm;Arp2;Arpc2;ast;Atg17;Atx2;babo;baz;bbx;BCL7-like;bcn92;ben;beta4GalT7;BicD;boi;bon;br;brat;Brf;bru1;bs;Btk29A;Bx;bys;CaBP1;cact;cad;Cad74A;Cad87A;CAHbeta;CanA-14F;Cdc42;ced-6;Cf2;cg;CG10366;CG10543;CG10702;CG10939;CG10960;CG11279;CG1129;CG11486;CG11873;CG11964;CG12173;CG12576;CG12825;CG…
cisbp__M6138	3.06	0.00691	Dif; dl (inferredBy_Orthology).	Blimp-1; Mnt (inferredBy_MotifSimilarity_n_Orthology).	194	595	14-3-3epsilon;Abl;ago;Akap200;Alh;aop;aPKC;BCL7-like;boi;br;brat;bru1;BtbVII;Bx;cad;ced-6;Cf2;CG10283;CG10543;CG1129;CG11873;CG13366;CG13603;CG13689;CG13907;CG17724;CG1824;CG1888;CG2063;CG3008;CG30497;CG31688;CG31869;CG32066;CG32152;CG32767;CG32816;CG3638;CG3655;CG42238;CG42258;CG42340;CG43386;CG43867;CG44838;CG45050;CG4768;CG5151;CG5174;CG5902;CG5937;CG5953;CG6163;CG6678;CG8031;CG8786;CG9005;CG9…
hdpi__CKMT1B	3.06	0.0069	Argk; CG30274; CG4546; CG5144 (inferredBy_Orthology).		130	414	14-3-3zeta;Acox57D-d;AGO1;Akt1;arm;Atg3;BCL7-like;beta-PheRS;betaTub56D;bip1;brat;bru1;cad;CanA-14F;capt;cg;CG10543;CG13397;CG14434;CG14478;CG17233;CG1888;CG31249;CG32767;CG32803;CG3632;CG3645;CG42245;CG42258;CG43658;CG43736;CG44838;CG5800;CG6951;CG8031;CG8112;CG9650;CG9911;Clbn;Clc;Coprox;cpb;CtBP;CycG;Cyp1;da;dpr6;Dredd;Dsp1;dtn;emb;Etf-QO;fax;flfl;FoxK;ftz-f1;Fur2;fz4;GATAd;Gclm;gpp;heph;hll;H…
transfac_pro__M04664	3.05	0.0069			255	873	a;Adgf-A;AGO1;Akt1;Alh;app;Aprt;Ask1;Atf-2;Atg17;babo;baz;bbx;beg;ben;Best1;boi;br;brat;bru1;bs;Btk29A;Caf1-180;CAHbeta;ced-6;CG10283;CG10543;CG11030;CG1129;CG11396;CG11399;CG11486;CG1172;CG12054;CG13366;CG13484;CG13689;CG14073;CG14408;CG14435;CG14440;CG15601;CG17977;CG1824;CG1888;CG2162;CG2691;CG2865;CG2924;CG30105;CG32365;CG32767;CG32772;CG32816;CG33230;CG33298;CG33635;CG34401;CG3777;CG3838;CG4…
transfac_pro__M07961	3.04	0.00689	Hnf4 (directAnnotation).		43	111	Atg13;CG12428;CG32147;CG33695;CG3808;CG43867;CG4598;CG5151;CG5180;CG5590;CG5885;CG6175;CG6621;CG7970;CG8031;CG9577;CG9650;CtBP;dpr6;E2f1;Etf-QO;fz;GstT1;hb;hdc;Hr39;kat80;l(2)k09913;Leash;Mnt;Mtpalpha;Pde11;Pdk1;Pli;PPO3;RNaseX25;scu;Sin3A;Thiolase;ush;Usp10;Wwox;yip2
transfac_pro__M04909	3.03	0.00688			31	73	Aef1;BCL7-like;boi;brat;cad;CG11486;CG11555;CG17078;CG17724;CG32767;cic;Cip4;Dl;E(Pc);g;hang;hdc;hoip;ken;osa;ovo;pnut;Prosap;rau;SF2;Sin3A;spen;Sulf1;Tis11;Tsp96F;wech
swissregulon__hs__ATF4.p2	3.03	0.00687		Atf3 (inferredBy_MotifSimilarity).Atf6; CrebB; E2f1; Jra (inferredBy_MotifSimilarity_n_Orthology).	70	218	Akt1;Apc2;betaTub56D;Bin1;br;brat;BRWD3;CD98hc;CG10413;CG10960;CG11486;CG14883;CG14985;CG17600;CG17734;CG17746;CG1888;CG30377;CG30497;CG31650;CG33995;CG44000;CG44001;CG44838;CG45050;CG5087;CG6051;CG6201;CG9005;CG9265;cher;CIAPIN1;CPT2;crol;crp;Csk;Dhc64C;E2f1;EDTP;glec;Got2;Hr4;hts;ics;Ilk;IP3K1;Khc;koi;l(2)gd1;mam;mol;Mur2B;Myc;Nedd4;polybromo;Reps;RhoGEF64C;Roc2;SLO2;smg;Snx3;Spn;sra;stck;stet;…
hdpi__BRUNOL4	3.03	0.00687	bru3 (inferredBy_Orthology).		366	1272	14-3-3epsilon;A16;Acox57D-d;Ada;Adgf-A;ago;AGO1;Akap200;Akt1;Alh;alpha-Man-Ia;alphaTub67C;aop;AP-1gamma;AP-1sigma;app;Arf51F;Arf79F;arm;Atg1;Atu;BCL7-like;bel;bip1;br;Br140;brat;bru1;bs;Bx;Cad87A;Cad99C;CanA-14F;capt;Cdk8;cert;cg;CG10462;CG10543;CG10914;CG11030;CG11109;CG11486;CG11802;CG11964;CG12895;CG13366;CG13397;CG13917;CG14057;CG14073;CG14434;CG14440;CG14478;CG14650;CG15601;CG17163;CG17233;C…
hocomoco__KLF16_HUMAN.H10MO.D	3.02	0.00686	cbt (inferredBy_Orthology).	crol; klu; l(3)neo38 (inferredBy_MotifSimilarity).Dp; Spps; peb; sr (inferredBy_MotifSimilarity_n_Orthology).	42	108	ago;aPKC;br;brat;CG10543;CG32767;CG43867;CG44838;CG5033;CG9650;chn;CycT;Dhit;DIP-alpha;Dys;fs(1)h;Glut1;hdc;heph;Hr4;jing;kibra;kuz;Lsd-2;mahe;mam;Mur2B;nocte;osa;ovo;pav;Plc21C;psq;Rab10;Rab8;RhoGAPp190;sbb;sim;Trf4-1;Uev1A;ush;zld
scertf__zhu.NHP6B	3.02	0.00686		Tbp (inferredBy_MotifSimilarity_n_Orthology).	205	695	14-3-3zeta;Abl;Ada;AGO1;akirin;Akt1;alph;app;Art4;Atg1;Atg5;baz;BCL7-like;bel;bip1;br;brat;bs;Bx;Cad87A;CanA-14F;Cbl;Cdc42;Cdk8;Cf2;CG11030;CG11486;CG12054;CG12164;CG13366;CG13907;CG14231;CG14440;CG14442;CG14478;CG14806;CG15744;CG17600;CG1764;CG30497;CG30499;CG31688;CG31935;CG32758;CG32767;CG3634;CG3704;CG4022;CG42245;CG42258;CG42340;CG42668;CG42674;CG44838;CG45050;CG5800;CG5805;CG5937;CG5953;CG6…
elemento__GCTGCGC	3.01	0.00685			163	496	14-3-3epsilon;Abl;alpha-Man-Ia;aop;Aps;apt;arm;ATbp;Atx2;B52;bel;bip1;br;bs;Cad87A;CanA-14F;Cda4;Cf2;CG11873;CG12054;CG1239;CG13551;CG13907;CG14442;CG14478;CG14820;CG17977;CG31694;CG31935;CG32066;CG32645;CG32767;CG32803;CG33722;CG3434;CG3689;CG4022;CG43386;CG44838;CG4998;CG5235;CG5292;CG5746;CG5953;CG6163;CG6398;CG6724;CG6770;CG7484;CG8207;CG8229;CG9107;CG9636;CG9650;CG9821;cher;Cht6;cib;cic;ClC-…
taipale__JDP2_full_NATGACGTCAYN	3.01	0.00685		Atf-2; Atf3; Atf6; CG44247; CrebA; CrebB; Jra; REPTOR-BP; crc; kay (inferredBy_MotifSimilarity).Xbp1 (inferredBy_MotifSimilarity_n_Orthology).	57	158	betaTub56D;Bin1;boca;br;BRWD3;bs;CenB1A;CG10413;CG12945;CG14883;CG1635;CG17746;CG30377;CG30497;CG31650;CG33995;CG3638;CG44000;CG44001;CG45050;CG9005;CG9265;Coprox;CrebB;Csk;Dhc64C;dlt;elm;Fit1;Gdi;Glut1;Gprk2;hts;Ilk;Khc;koi;LanA;loco;lost;mol;Mur2B;polybromo;Rab10;Roc2;rod;scramb1;Sema1a;SLO2;smt3;Spn;sra;stck;stet;ttv;tun;ush;vib
cisbp__M1427	3.01	0.00685			26	59	a;br;CAHbeta;CG13689;CG30497;CG32816;CG4364;CG9650;CrebB;CycG;fs(1)h;ftz-f1;fz;heph;Mi-2;Mur2B;Pdk1;por;Prosap;RpL6;sqd;Su(Tpl);Trl;ttk;Unr;zld
homer__CCCCGCGC_SUT1_	3	0.00684			319	1165	14-3-3epsilon;a;Abl;Acox57D-d;AGO1;Alh;alph;aop;AP-1gamma;AP-1sigma;AP-2mu;aPKC;Arf79F;ash1;Atg1;Atg10;B4;babo;Bap111;BCL7-like;bel;BicC;BicD;bip1;Bmcp;br;Br140;brat;bru1;BtbVII;Bx;CanA-14F;Cf2;cg;CG10375;CG10462;CG10492;CG10543;CG11030;CG11137;CG11837;CG11906;CG12054;CG12825;CG12895;CG13625;CG14440;CG14621;CG1529;CG1532;CG16700;CG17834;CG18508;CG18549;CG1888;CG2182;CG2186;CG2865;CG3008;CG30105;C…
transfac_pro__M01303	3	0.00684	Spps (inferredBy_Orthology).	sr (inferredBy_MotifSimilarity_n_Orthology).	70	219	14-3-3epsilon;B4;ben;boi;brat;Bx;Cbl;cg;CG13625;CG32767;CG3655;CG42238;CG42724;CG43867;CG44838;CG5611;CG9650;chn;CkIIalpha-i1;cpb;DCP2;Dys;Eip63E;fax;fra;fs(1)h;fz;Glut1;hb;hdc;heph;jing;kibra;l(2)37Cg;lilli;mahe;mam;mei-P26;Mrtf;Mtl;mub;Mur2B;Myc;MYPT-75D;nej;nocte;ovo;P32;Pi3K21B;Plc21C;psq;px;qkr54B;Rab8;RhoGAPp190;RhoGDI;sbb;Sema1b;simj;SKIP;slif;Smurf;Sxl;Tab2;Top1;ttv;Uev1A;z;zfh1;zld
scertf__badis.STP3	3	0.00684			1087	3955	14-3-3zeta;a;A16;Aatf;Abl;Acf;Ada;Ada2b;Ada3;Aef1;aft;Afti;ago;AGO1;Akap200;akirin;Akt1;Alh;alph;alpha-Man-Ia;alpha-Man-Ib;alpha-Man-IIb;alt;aop;AP-1sigma;AP-2alpha;AP-2mu;AP-2sigma;Apc;app;Aprt;Aps;apt;Arc42;Arf51F;ArfGAP3;ari-2;Arp2;Arp3;Art4;ash1;Ask1;asp;Atac2;ATbp;Ate1;Atf-2;Atg1;Atg18a;Atg5;atms;Atu;Atxn7;Axud1;B4;babo;baz;bc10;BCL7-like;Bem46;ben;Bet3;beta-PheRS;beta4GalNAcTA;beta4GalT7;be…
transfac_pro__M00803	3	0.00684	Dp; E2f1; E2f2 (inferredBy_Orthology).		1432	4982	128up;14-3-3epsilon;26-29-p;a;A16;Aatf;Abl;Acf;Ack-like;Acox57D-d;Ada2b;Adck;ADD1;Adf1;Adgf-A;Aef1;Afti;ago;AGO1;agt;AIMP2;Akap200;Akt1;Alh;alph;alpha-Man-Ia;alpha-Man-IIb;alt;Amun;aop;AP-1gamma;AP-2mu;Apc;aPKC;app;Aprt;apt;aralar1;Arc42;Arf51F;ArgRS-m;Arl1;Arp10;Arp2;Arpc4;Ars2;ash1;Ask1;asp;Atf-2;Atg1;Atg18a;Atg3;atms;Atu;Atx2;aurA;aux;az2;B4;babo;barc;baz;bbx;BCL7-like;bcn92;Bdbt;BEAF-32;beg;b…
cisbp__M0756	3	0.00684		FoxK; foxo (inferredBy_MotifSimilarity_n_Orthology).	299	1018	a;Adgf-A;AGO1;Akap200;Akt1;Alh;AP-1gamma;app;apt;arm;Atg17;ben;betaTub56D;br;brat;bru1;Btk29A;Bx;CAHbeta;CanA-14F;capt;ced-6;cg;CG10543;CG10903;CG11486;CG11873;CG12054;CG12576;CG13366;CG13625;CG13689;CG14073;CG14478;CG15601;CG17233;CG17724;CG1888;CG2063;CG2162;CG2691;CG2747;CG2865;CG30105;CG30497;CG31223;CG31224;CG31869;CG31935;CG3224;CG32767;CG32772;CG32803;CG33298;CG34317;CG3632;CG3645;CG3689;C…

## Sheet: male-biased CRE enrichment
motif	NES	AUC	TF_highConf	TF_lowConf	nEnrGenes	rankAtMax	enrichedGenes
flyfactorsurvey__lola-PG_SOLEXA_FBgn0005630	3.33	0.0132	lola (directAnnotation).		1191	2801	18w;2mit;5-HT1A;5-HT2B;5-HT7;7B2;AANATL2;aay;ab;Abd-B;Ac78C;ACC;AcCoAS;Ace;Acsl;Act57B;Act88F;Actn;AdamTS-A;Adar;Adh;Adhr;Adk1;AdoR;Ady43A;AGBE;Akh;al;Ald;Aldh-III;alpha-Est10;alpha-Est4;alpha-Est7;alpha-Est9;amon;AMPdeam;Ance-3;Ank2;Ant2;Antp;AOX4;arg;Argk;arr;ASPP;AstA-R1;Asx;Atet;atilla;Atpalpha;ATPsynC;axo;bab1;bab2;Bacc;Baldspot;bark;bbc;bbg;bdl;beat-Ib;beat-Ic;beat-IIa;beat-IIb;beat-IIIa;be…
stark__ACACNNACAC	3.23	0.0131			89	142	ab;Abd-B;Antp;Appl;bi;brp;bru2;bru3;Bsg;Ca-alpha1T;CG12912;CG13123;CG17321;CG18265;CG33120;CG34354;CG34355;CG42342;CG42540;CG42795;CG45002;Cngl;Con;ct;dac;dan;Dbx;disco;disco-r;DopEcR;Dscam1;Dscam4;eag;Eip74EF;fid;GluClalpha;Glut4EF;grh;Gycbeta100B;Hr3;hth;IA-2;Ih;klu;l(3)neo38;mgl;Mid1;Mp;nAChRalpha5;nAChRalpha6;NaCP60E;Nckx30C;oc;para;pdm3;Ppa;Ppox;pros;PVRAP;rad;Rbp6;rg;Rim;rn;Rph;Rx;salm;salr…
tfdimers__MD00228	3.22	0.0131	crp (inferredBy_Orthology).		77	114	2mit;5-HT1B;5-HT7;ab;Ac13E;Antp;AOX4;ATP8B;Atpalpha;bab1;beat-IIIa;bin;bnl;bru3;CadN2;CG10175;CG11317;CG11459;CG13117;CG13325;CG13606;CG34347;CG34384;CG42750;CG42788;CG44085;CG5639;CG7778;CG8481;cmpy;Con;dally;Dh31;dnc;Dr;Drl-2;Dyrk2;Eip75B;Fife;fru;grn;Hs3st-A;IA-2;inv;Kah;kirre;Lim1;lov;mbl;mspo;MsR1;mtt;nAChRalpha5;Nckx30C;nvy;Obp56h;Oct-TyrR;Pde1c;pdm2;Ptp99A;rad;Rbp6;robo2;sano;Sdc;Ser;Shaw;…
stark__ACACNNNNRCAC	3.15	0.013			56	74	ab;AstA-R1;bi;brp;bru3;Bsg;Ca-alpha1T;CG12912;CG18265;CG34355;CG42540;CG42795;CG45002;ct;disco;disco-r;DopEcR;Dscam4;dve;eag;Fbxl7;GluClalpha;Glut4EF;grh;Hr3;hth;Ih;klu;l(3)neo38;mgl;Mid1;Mp;nAChRalpha5;nAChRalpha6;NaCP60E;Nckx30C;para;pdm3;Ppa;Ppox;pros;PVRAP;rad;Rbp6;Rim;Rx;salr;sano;sgg;slo;SP2353;Syp;Task6;Tomosyn;tow;Wnt2
scertf__harbison.GLN3	3.05	0.0129	GATAd; GATAe; grn; pnr; srp (inferredBy_Orthology).		1881	4677	5-HT1A;5-HT2B;5-HT7;7B2;a5;AANATL2;aay;abd-A;Abd-B;Ac13E;Ac76E;ACC;AcCoAS;Ace;Acsl;Act88F;ACXD;AdamTS-A;AdipoR;Adk3;adp;Ag5r;AGBE;AhcyL2;AkhR;al;Ald;Aldh;Aldh-III;alpha-Est1;alpha-Est4;alpha-Est8;alpha-Est9;alpha-Spec;alphaTry;alrm;Amnionless;amon;Amph;Amt;Amyrel;ana;Ance;Ance-3;Ance-5;Ank2;Ant2;Antp;AnxB9;aos;AOX1;AOX4;ap;Aplip1;Apoltp;Appl;ara;arg;Argk;Arpc5;arr;Arr1;Asph;ASPP;AstA-R1;AstA-R2;A…

## Sheet: female-spec. up CRE enrichment
motif	NES	AUC	TF_highConf	TF_lowConf	nEnrGenes	rankAtMax	enrichedGenes
cisbp__M2330	7.36	0.011	pnr (directAnnotation).	BEAF-32 (inferredBy_MotifSimilarity).	708	4993	128up;312;5-HT1A;a10;Adk2;ago;AIMP2;AIMP3;AlaRS;amd;angel;Ank2;AP-2mu;Aplip1;ara;ArfGAP1;arg;arm;Arpc3B;Art7;AsnRS;AspRS;Atg12;Atg14;Atg16;Atu;Atxn7;aurB;ave;bai;BEAF-32;beat-IIb;beat-VII;beg;Bem46;beta'COP;betaTub56D;bic;borr;Br140;Brd8;Brms1;by;cactin;Cad89D;Ccn;Cdc23;Cdc6;Cdk4;Cdk7;CG10139;CG10205;CG10222;CG10338;CG10405;CG10435;CG10470;CG10495;CG10565;CG10576;CG10616;CG10737;CG1074;CG10778;CG…
jaspar__MA0536.1	7.16	0.0108		BEAF-32; pnr (inferredBy_MotifSimilarity).	699	4853	128up;312;5-HT1A;a10;Acyp2;Adk2;ago;AIMP2;AIMP3;AlaRS;angel;Ank2;AP-2mu;Aplip1;ara;ArfGAP1;arg;arm;Arpc3B;Art7;AsnRS;AspRS;Atg12;Atg14;Atg16;Atu;Atxn7;aurB;ave;bai;BEAF-32;beat-IIb;beat-VII;beg;Bem46;beta'COP;betaTub56D;bic;borr;Br140;Brd8;Brms1;by;cactin;Cad89D;Ccn;Cdc23;Cdc6;Cdk7;CG10139;CG10205;CG10222;CG10338;CG10405;CG10435;CG10470;CG10495;CG10565;CG10576;CG10616;CG10737;CG1074;CG10778;CG108…
homer__AVYTATCGATAD_DREF	6.81	0.0104		Dref; pnr (inferredBy_MotifSimilarity).	723	4976	128up;312;5-HT1A;a10;Acyp2;Adk2;ago;AIMP2;AIMP3;AlaRS;alpha4GT1;amd;angel;Ank2;AP-2mu;Aplip1;ara;ArfGAP1;arg;arm;Arpc3B;Art7;asf1;AsnRS;AspRS;Atg12;Atg14;Atu;Atxn7;aurB;ave;bai;BEAF-32;beat-IIb;beat-VII;beg;Bem46;beta'COP;beta4GalT7;betaTub56D;bic;blot;borr;Brd8;Brms1;by;cactin;Cad89D;caup;Ccn;Cdc23;Cdc6;Cdk4;Cdk7;CG10139;CG10205;CG10222;CG10405;CG10435;CG10470;CG10495;CG10565;CG10576;CG10616;CG1…
elemento__TATCGATA	5.42	0.00888			697	4987	128up;312;5-HT1A;Adk2;ago;AIMP2;AIMP3;AlaRS;angel;Ank2;Ankle2;AP-2mu;ArfGAP1;arg;arm;Arpc3A;Arpc3B;Art7;Art8;asf1;ash2;AsnRS;AspRS;Atg12;Atg14;Atu;Atxn7;aurB;ave;Aven;bai;beat-IIb;beat-VII;Bem46;beta'COP;betaTub56D;bic;blot;borr;Brd8;Brms1;by;cactin;Cad89D;CAH1;caup;Ccn;Cdc23;Cdk4;Cdk7;CG10139;CG10205;CG10222;CG10338;CG10405;CG10435;CG10470;CG10495;CG10576;CG10616;CG10737;CG1074;CG10778;CG10827;C…
homer__MYGGTCACACTG_Unknown1	4.49	0.00787			716	4882	312;5-HT1A;Acyp2;AdipoR;adp;ago;AIF;AIMP2;amx;Ank2;AP-1-2beta;AP-1mu;AP-2mu;aph-1;ArfGAP1;Arfrp1;Arl1;arm;Arp1;Arpc5;asf1;ash2;atms;Atxn7;aurB;Aven;awd;Bdbt;beat-IIb;beat-VII;Bem46;beta-PheRS;beta'COP;beta4GalT7;betaTub56D;Bgb;BHD;bic;Blos4;blot;Bmcp;bor;borr;boss;Brms1;brn;btz;Bx42;c12.1;Cad89D;caps;capt;car;caup;cbc;Ccn;Cdc23;CDC45L;cdm;CenB1A;CG10068;CG10098;CG10131;CG10139;CG10214;CG10222;CG1…
cisbp__M2325	4.42	0.0078	BEAF-32 (directAnnotation).	pnr (inferredBy_MotifSimilarity).	712	4993	128up;312;5-HT1A;a10;Ack;Acyp2;ago;AIMP2;AIMP3;AlaRS;amd;angel;Ank2;Aplip1;ara;ArfGAP1;Arfrp1;arg;arm;Arpc3B;Art7;asf1;AsnRS;AspRS;Atg12;Atg14;Atu;Atxn7;aurB;ave;bai;BEAF-32;beat-IIb;beat-VII;beg;beta-PheRS;beta'COP;beta4GalT7;betaTub56D;bic;borr;Br140;Brd8;Brms1;Bx42;by;byn;cactin;Cad89D;CAH1;caps;Ccn;Cdc23;Cdk4;Cdk7;CG10139;CG10205;CG10222;CG10338;CG10405;CG10435;CG10470;CG10495;CG10565;CG10576…
homer__ACVAKCTGGCAGCGC_Unknown3	4.42	0.0078			376	2994	Acyp2;AdipoR;adp;amd;Aos1;aph-1;Arfrp1;Arl1;arm;Art7;Aven;BEAF-32;beat-VII;beta'COP;Bgb;bic;Blos3;blot;bor;borr;BthD;btz;Bx42;by;byn;cactin;caps;caup;Ccn;Cdc6;CG10131;CG10139;CG10338;CG10445;CG10576;CG10731;CG11007;CG11044;CG11073;CG11127;CG11141;CG11279;CG11504;CG11674;CG11752;CG11837;CG11882;CG11906;CG11982;CG12134;CG12320;CG12343;CG12655;CG12975;CG12994;CG13319;CG13689;CG13743;CG13773;CG13847;…
bergman__Dref	4.26	0.00762	Dref (directAnnotation).		717	4998	128up;312;5-HT1A;a10;Adk2;ago;AIMP2;AIMP3;AlaRS;angel;Ank2;Ankle2;AP-2mu;Aplip1;ArfGAP1;arg;arm;Arp10;Arpc3B;Art7;Art8;asf1;AsnRS;AspRS;Atg12;Atg14;Atu;Atxn7;ave;Aven;bai;BEAF-32;beat-IIb;beat-VII;Bem46;beta'COP;betaTub56D;bic;blot;bor;borr;Brd8;Brms1;by;cactin;Cad89D;CAH1;caup;Ccn;Cdc23;Cdk4;Cdk7;CG10139;CG10205;CG10222;CG10338;CG10405;CG10435;CG10470;CG10495;CG10576;CG10616;CG10737;CG1074;CG107…
tiffin__TIFDMEM0000116	4.22	0.00757			688	4392	312;5-HT1A;AdipoR;adp;ago;AIF;AIMP2;alphaTub84D;amx;Ank2;Ankle2;AP-1-2beta;AP-1mu;AP-2mu;ara;ArfGAP1;Arfrp1;arm;Arp1;Arpc3A;Arpc5;asf1;ash2;atms;Atxn7;aurB;awd;Bdbt;beat-IIb;beat-VII;Bem46;beta-PheRS;beta'COP;beta4GalT7;betaTub56D;Bgb;BHD;Blos4;blot;Bmcp;bor;borr;boss;Brd8;Brms1;brn;Bx42;byn;c12.1;CAH1;caps;car;cbc;Ccn;Cdc23;CDC45L;CenB1A;CG10068;CG10098;CG10131;CG10133;CG10214;CG10222;CG10338;CG…
stark__MATTRRCACNY	4.21	0.00757			14	62	beat-IIb;CG8170;cysu;eya;fred;Glut1;hng3;kek3;Mad;MESR3;mspo;Nlg4;robo3;tx
jaspar__MA0529.1	4.17	0.00752		BEAF-32; pnr (inferredBy_MotifSimilarity).	678	4782	128up;312;5-HT1A;Ack;Acyp2;ago;AIMP2;AIMP3;amd;angel;Ank2;Aplip1;ara;ArfGAP1;arg;arm;Arpc3B;Art7;AsnRS;AspRS;Atg12;Atg14;Atu;Atxn7;aurB;ave;bai;BEAF-32;beat-IIb;beat-VII;beta-PheRS;beta'COP;beta4GalT7;betaTub56D;bic;blot;borr;Br140;Brd8;Brms1;BthD;by;byn;cactin;Cad89D;CAH1;caup;Ccn;Cdc23;Cdk7;CG10139;CG10205;CG10222;CG10338;CG10405;CG10435;CG10470;CG10495;CG10565;CG10576;CG10616;CG10737;CG1074;CG…
elemento__GTGTGACC	4.15	0.0075			663	4999	312;5-HT1A;AdipoR;adp;ago;AIF;alphaTub84D;amx;Ank2;Ankle2;AP-1-2beta;AP-1mu;AP-2mu;ara;ArfGAP1;Arfrp1;arg;Arl1;arm;Arp1;Arpc3A;Arpc5;asf1;ash2;AstA;Atu;Atxn7;aurB;awd;Bdbt;beat-IIb;beat-VII;beta-PheRS;beta'COP;beta4GalT7;betaTub56D;BHD;bic;Blos4;blot;Bmcp;boca;bor;borr;boss;Brms1;brn;Bx42;by;byn;CAH1;caps;car;cbc;Ccn;Cdc23;CDC45L;Cdc6;cdm;ced-6;CenB1A;CG10068;CG10131;CG10205;CG10214;CG10338;CG104…
swissregulon__hs__ONECUT1_2.p2	4.12	0.00747	onecut (inferredBy_Orthology).		16	78	Ccn;CG33143;CG42337;CG42339;CG4341;CG6184;CG6683;CG6765;DAAM;dpr9;Dscam3;frma;Glut1;kek2;Roc2;Traf4
elemento__ACACGTCA	4.05	0.00739			13	48	Arl1;CG12404;CG14182;CG1486;CG33774;CG4266;CG5861;comm;eca;GalNAc-T2;oaf;p115;Syx5
hocomoco__EVI1_HUMAN.H10MO.B	4.01	0.00735		CG10348; ham (inferredBy_MotifSimilarity_n_Orthology).	52	411	AdipoR;ara;CG10086;CG13551;CG14933;CG15611;CG17571;CG18635;CG30269;CG30273;CG30343;CG3036;CG32813;CG42268;CG42594;CG4781;CG5399;CG6115;CG7011;CG7800;CG8149;CG9673;ckn;CysRS;disco-r;esg;Glut1;Gmap;hig;Jon65Aiv;mab-21;mesh;MESR3;mol;mspo;MtnD;MtnE;MTPAP;Nha2;Nlg4;pain;Pde8;Rca1;RFeSP;RhoL;robo3;Sce;spheroide;st;svp;vnd;w
hocomoco__CR3L2_HUMAN.H10MO.D	4	0.00734	CrebA (inferredBy_Orthology).	Atf6 (inferredBy_MotifSimilarity).Xbp1 (inferredBy_MotifSimilarity_n_Orthology).	81	781	5-HT1A;Arl1;AspRS;beat-VII;beg;Ccn;CG12237;CG12404;CG13123;CG13743;CG13901;CG14182;CG14220;CG1486;CG15803;CG17600;CG2006;CG2310;CG31345;CG33774;CG34461;CG4266;CG43402;CG5276;CG5646;CG5861;CG6959;CG7011;CG7655;CG7720;CG8607;CG8910;CG9394;CG9630;CG9967;ckn;comm;DCTN2-p50;Der-2;Dh31;dnr1;Dscam3;eca;GalNAc-T2;Gclm;GILT3;Glut1;Gmap;grsm;hng3;inaC;Kif19A;klg;kn;LamC;MESR3;Moca-cyp;mRpL40;nAChRbeta3;neb…
cisbp__M6225	3.96	0.0073		CG10348; ham (inferredBy_MotifSimilarity_n_Orthology).	42	318	AdipoR;ara;CG10086;CG13551;CG14933;CG15611;CG17571;CG18635;CG30343;CG3036;CG32813;CG42268;CG4781;CG5399;CG8149;CG9673;ckn;CysRS;disco-r;esg;Glut1;Gmap;hig;Jon65Aiv;mab-21;mesh;MESR3;mspo;MtnD;MtnE;MTPAP;Nha2;Nlg4;pain;Pde8;Rca1;RFeSP;RhoL;robo3;spheroide;st;svp
transfac_pro__M01438	3.88	0.0072		ems; eve; slou (inferredBy_MotifSimilarity).E5; bsh; ftz; pb; zen (inferredBy_MotifSimilarity_n_Orthology).	13	57	byn;CG14082;CG14949;CG31176;CG31345;CG42369;CG7720;GstE11;NetA;nub;stet;svp;ZnT35C
flyfactorsurvey__Dref_FlyReg_FBgn0015664	3.86	0.00719	Dref (directAnnotation).		700	4991	128up;312;5-HT1A;Acyp2;AdipoR;Adk2;ago;AIMP2;AIMP3;AlaRS;alpha4GT1;alphaTub84D;amd;angel;Ank2;AP-2mu;Aplip1;ArfGAP1;arg;arm;Arpc3B;Art7;asf1;AsnRS;AspRS;Atg12;Atg14;Atg16;Atu;Atxn7;ave;bai;BEAF-32;beat-IIb;beat-VII;Bem46;beta-PheRS;beta'COP;betaTub56D;bic;blot;bora;borr;Brd8;Brms1;by;byn;cactin;CAH1;caps;caup;Ccn;Cdc23;Cdk4;Cdk7;CenB1A;CG10086;CG10131;CG10139;CG10222;CG10435;CG10470;CG10495;CG105…
cisbp__M4710	3.84	0.00716		Blimp-1 (inferredBy_MotifSimilarity).	28	196	atms;beat-VII;beg;caps;Cdc6;CG12769;CG13743;CG17327;CG30424;CG32645;CG34253;CG3770;CG3777;CG43333;CG4341;CG5921;CG8170;CG9967;coro;Gycalpha99B;kn;mspo;nub;RFeSP;rols;stops;Tsp86D;vir-1
stark__ATCTNATC	3.77	0.00709			22	122	ara;beta4GalT7;caup;CG10827;CG31176;CG31475;CG31688;CG32813;CG7120;CG8620;CG9673;ckn;dnr1;Jon65Aiv;mab-21;mesh;mspo;MTPAP;Pde8;st;Traf4;trpl
transfac_pro__M05290	3.73	0.00704			458	4490	312;a10;Ack;ago;Ank2;ArfGAP1;Arl1;Arp10;Art8;AspRS;Atg16;atms;aurB;Aven;awd;bai;beat-IIb;beg;Bem46;beta-PheRS;beta'COP;blot;Bmcp;caps;caup;CCDC53;Ccn;ced-6;CG10133;CG10139;CG10274;CG10399;CG10654;CG10737;CG1074;CG11044;CG11099;CG11279;CG11378;CG11403;CG11409;CG11438;CG11444;CG11710;CG11808;CG11836;CG11893;CG12107;CG12164;CG12219;CG12404;CG12769;CG12909;CG12950;CG12994;CG13005;CG13025;CG13123;CG13…
transfac_pro__M08792	3.64	0.00695	CG10348; ham (inferredBy_Orthology).	pnr (inferredBy_MotifSimilarity).	70	671	AdipoR;ara;by;CAH1;caps;caup;CenB1A;CG10086;CG10827;CG11898;CG13510;CG13551;CG14933;CG15611;CG15674;CG17571;CG18635;CG30269;CG30273;CG3036;CG32813;CG34194;CG42268;CG42284;CG4741;CG4781;CG5399;CG6115;CG6420;CG7497;CG7800;CG7992;CG8149;CG8785;CG8907;CG9673;ckn;comm;cyr;CysRS;Dh31;disco-r;dnr1;esg;eya;flr;Gmap;GstD9;hebe;ifc;Jon65Aiv;kermit;mesh;MESR3;MFS14;mspo;MtnC;MtnD;MtnE;MTPAP;NetA;Nlg4;pain;P…
cisbp__M5613	3.61	0.00691	Max (inferredBy_Orthology).	Myc (inferredBy_MotifSimilarity_n_Orthology).	36	286	Bmcp;CG11191;CG11671;CG13847;CG13905;CG15803;CG18135;CG18208;CG18507;CG30158;CG32698;CG3332;CG34461;CG4341;CG5646;CG8149;CG8607;CheA75a;dnr1;eya;fred;Gld;LamC;MESR3;MFS14;Nha2;Obp84a;Rca1;RhoL;robo3;salr;Six4;spz5;Tgi;Traf4;tx
taipale__MAX_DBD_CACGTGNNNNNCACGTG_repr	3.61	0.00691	Max (inferredBy_Orthology).	Myc (inferredBy_MotifSimilarity_n_Orthology).	29	226	CG11191;CG11671;CG13905;CG15803;CG18135;CG18208;CG18507;CG30158;CG32698;CG3332;CG4341;CG8149;CG8607;CheA75a;dnr1;fred;Gld;LamC;MESR3;MFS14;Obp84a;Rca1;RhoL;salr;Six4;spz5;Tgi;Traf4;tx
transfac_pro__M07926	3.6	0.0069	ZIPIC (directAnnotation).		563	4994	128up;5-HT1A;Acyp2;Adk2;adp;ago;AhcyL2;AIF;AIMP3;alpha-Est9;alphaTub67C;Ank2;Aplip1;ArfGAP1;arg;Arpc3A;Arpc3B;Arpc5;Art8;ash2;asrij;AstA;Atg12;Atg14;atms;Atu;Atxn7;bai;beat-IIb;beat-VII;Bem46;Bet3;betaTub56D;blot;Bmcp;boca;boss;BthD;Bug22;by;Caf1-180;CAH1;caps;car;caup;CCHa1;Ccn;Cdc6;ced-6;CenB1A;CG10068;CG10116;CG10131;CG10139;CG10205;CG10222;CG10495;CG10576;CG10585;CG10646;CG10681;CG10731;CG107…
transfac_pro__M07386	3.6	0.0069	CG4328; Lmx1a (inferredBy_Orthology).		18	104	5-HT1A;b;beat-VII;caup;CG18507;CG30158;CG31345;CG4341;CG7011;CG7720;CheA75a;dpr9;Gld;Glut1;GstE11;kn;nub;stet
cisbp__M5223	3.53	0.00683	Clk (directAnnotation).	Hey; tai (inferredBy_MotifSimilarity).	126	1169	AdipoR;Ank2;Aplip1;arg;Atg12;atms;beat-VII;bic;blot;caps;Ccn;CG10338;CG11459;CG11563;CG11671;CG12343;CG12994;CG13905;CG14082;CG14210;CG15019;CG15068;CG15803;CG16812;CG17278;CG1885;CG2972;CG30158;CG30373;CG3085;CG31345;CG31688;CG3225;CG32645;CG34288;CG42337;CG42339;CG42594;CG42668;CG4341;CG4364;CG5276;CG5346;CG5646;CG5835;CG6184;CG6712;CG6724;CG6959;CG7637;CG8027;CG8180;CG8607;CG9286;CG9300;CG9394…
transfac_pro__M06652	3.5	0.00679	CG7372 (inferredBy_Orthology).	CG5245 (inferredBy_MotifSimilarity_n_Orthology).	28	208	beat-VII;boss;CAH1;CG12769;CG1578;CG30046;CG31176;CG31345;CG42339;CG9422;CG9967;grsm;IntS14;klg;LamC;mspo;NetA;Nlg1;nub;Rh5;robo3;Roc2;sob;stck;svp;Tdc2;tx;zld
flyfactorsurvey__Sox14_SANGER_10_FBgn0005612	3.46	0.00675	Sox14 (directAnnotation).		14	69	amd;beat-IIb;caps;CG11882;CG17230;CG18208;CG32698;kek2;nub;oaf;salr;sals;Sox21a;tko
transfac_public__M00082	3.45	0.00673		pnr (inferredBy_MotifSimilarity_n_Orthology).	93	948	5-HT1A;AdipoR;ara;beat-IIb;beat-VII;betaTub56D;caps;caup;CenB1A;CG10086;CG10827;CG11898;CG12769;CG13510;CG13551;CG13689;CG14933;CG15347;CG1550;CG15611;CG17571;CG18208;CG18635;CG2681;CG30269;CG30273;CG3036;CG30392;CG31688;CG32813;CG33108;CG33127;CG34194;CG3570;CG3792;CG42268;CG4781;CG5399;CG6959;CG7365;CG7497;CG7745;CG7800;CG7888;CG7992;CG8149;CG8907;CG8910;CG9497;CG9630;CG9967;ckn;comm;CysRS;disc…
tiffin__TIFDMEM0000074	3.44	0.00673			706	4945	128up;312;5-HT1A;a10;Acyp2;Adk2;ago;AIMP2;AIMP3;Ank2;Ankle2;Aos1;Aplip1;ArfGAP1;arg;arm;Arp10;Art7;ash2;AsnRS;AspRS;Atg12;Atg14;Atu;Atxn7;ave;BEAF-32;beat-IIb;beat-VII;beta'COP;beta4GalT7;bic;blot;borr;Br140;Brd8;Brms1;Bug22;by;byn;c12.1;cactin;Cad89D;Caf1-180;CAH1;caps;Cdc23;Cdc6;Cdk7;CG10131;CG10139;CG10205;CG10338;CG10405;CG10435;CG10470;CG10495;CG10576;CG10616;CG10737;CG1074;CG10778;CG10827;C…
cisbp__M5469	3.43	0.00671	foxo (inferredBy_Orthology).	CHES-1-like; bin; slp2 (inferredBy_MotifSimilarity).FoxK; FoxP; croc; fd59A; fkh; slp1 (inferredBy_MotifSimilarity_n_Orthology).	21	148	5-HT1A;byn;caps;CG17930;CG18135;CG30015;CG32698;CG34408;CG42363;CG7720;fred;Ggamma30A;insc;kermit;mRpL1;mspo;Nlg4;pirk;Traf4;trpl;ubl
transfac_pro__M05814	3.41	0.00669			42	327	beat-IIb;CG10205;CG13689;CG13905;CG13912;CG14082;CG15068;CG16886;CG17230;CG32698;CG3777;CG4259;CG42668;CG5346;CG5597;CG6650;CG6959;CG8498;CG9967;DCP1;fred;Galphai;Glut1;Hira;Idgf5;inaC;kar;kn;MFS14;MtnD;Nlg4;Oatp58Dc;pico;Poxm;robo3;rols;RpS10b;sals;Shal;Su(fu);Traf4;trbd
taipale__FOXO4_DBD_GTAAACA	3.36	0.00663	foxo (inferredBy_Orthology).	CHES-1-like; bin; slp2 (inferredBy_MotifSimilarity).FoxK; FoxP; croc; eve; fd59A; fkh; slp1 (inferredBy_MotifSimilarity_n_Orthology).	18	114	5-HT1A;byn;caps;CG18135;CG32698;CG34408;CG42363;CG7720;fred;Ggamma30A;kermit;mRpL1;mspo;Nlg4;pirk;Traf4;trpl;ubl
flyfactorsurvey__l_1_sc_da_SANGER_5_FBgn0000413	3.33	0.00661	da (directAnnotation).	ac; ase (inferredBy_MotifSimilarity).	16	101	Ank2;CG11771;CG12164;CG31176;CG31688;CG5921;CG8768;DCTN5-p25;fred;hng3;MESR3;Oseg4;Pfdn1;Poc1;Sgt;Traf4
predrem__nrMotif1055	3.32	0.0066			16	79	byn;CG30343;CG31475;CG7800;CG9926;ckn;eya;fred;hig;Kal1;klg;kn;mRpL21;mspo;NetA;Poxm
predrem__nrMotif1110	3.32	0.0066			20	131	caps;Ccn;CG17230;CG30158;CG31176;CG32698;CG42390;CG4364;CG4896;fred;Gmap;Jon65Aiii;kek2;mol;Nlg4;noc;Pfdn5;vir-1;Vps25;ZnT35C
transfac_pro__M07657	3.32	0.00659	sage (directAnnotation).	ac; amos (inferredBy_MotifSimilarity).HLH54F; nau (inferredBy_MotifSimilarity_n_Orthology).	659	4989	312;5-HT1A;AdipoR;AhcyL2;Alas;Alg10;alpha-Est9;alpha-PheRS;amd;ara;ArfGAP1;Art7;ash2;AsnRS;AspRS;Atg16;atms;Atxn7;aurA;Aven;BEAF-32;beat-VII;beg;beta-PheRS;beta'COP;beta4GalT7;betaggt-I;betaTub56D;blot;blow;boca;bor;Br140;by;byn;Cad89D;car;Ccn;CDC45L;Cdc6;Cdk7;ced-6;cerv;CG10098;CG10131;CG10139;CG10214;CG10399;CG10424;CG10435;CG10660;CG10681;CG10731;CG10737;CG11035;CG11044;CG11073;CG11110;CG11127…
cisbp__M6013	3.28	0.00655	slp1 (inferredBy_Orthology).	CHES-1-like (inferredBy_MotifSimilarity).FoxK; FoxP; bin; croc; fd59A; fd64A; fd96Ca; fd96Cb; fkh; foxo (inferredBy_MotifSimilarity_n_Orthology).	8	22	byn;caps;CG18135;CG32698;fred;kermit;Traf4;trpl
neph__UW.Motif.0014	3.26	0.00653			16	83	CG6678;CG6959;CG7720;CG9422;cmpy;cysu;Ggamma30A;Ir76b;kek2;MESR3;mRpL2;NetA;Tdc2;trh;Ts;Vps25
flyfactorsurvey__ken_SANGER_10_FBgn0011236	3.26	0.00653	ken (directAnnotation).		11	50	caps;CG43333;CG4341;CG5921;inaC;kn;nub;RFeSP;stops;Tsp86D;wus
predrem__nrMotif1490	3.23	0.00649			14	86	Ank2;caps;CG12164;CG30499;CG42594;CG5001;CG8607;fred;frma;Hf;hig;hng3;l(2)37Cc;robo3
cisbp__M5584	3.2	0.00647	Rx (inferredBy_Orthology).	Awh; CG11294; CG32532; CG34367; CG9876; Drgx; E5; Lim3; Optix; Pph13; Vsx1; Vsx2; al; ap; bsh; ems; en; hbn; otp; ro; unpg (inferredBy_MotifSimilarity).PHDP; Traf4; unc-4 (inferredBy_MotifSimilarity_n_Orthology).	50	438	aurB;caps;CG10131;CG10616;CG1434;CG15803;CG31176;CG31345;CG32698;CG33143;CG42668;CG4781;CG6495;CG7011;CG7720;CG8419;CG9967;corn;CS-2;Dnz1;esg;eya;fred;Gbeta76C;Ggamma30A;Glut1;hebe;Idgf5;inaC;insc;klg;kn;MESR3;mol;mspo;NetA;nub;pain;Pde8;PIP82;rgr;Rh6;Rpn8;SmydA-8;stops;svp;Traf4;trpl;Uev1A;wrapper
cisbp__M2049	3.2	0.00647	ro (directAnnotation).	Awh; CG18599; CG9876; E5; Lim3; OdsH; Optix; Pph13; Rx; Vsx2; ap; ems; en; eve; ind; otp; unpg (inferredBy_MotifSimilarity).CG32532; CG34367; PHDP; inv; unc-4; zen; zfh2 (inferredBy_MotifSimilarity_n_Orthology).	21	129	CG14949;CG15803;CG18208;CG30158;CG31345;CG4341;CG4781;CG6678;CG7011;CG8170;CG9886;CG9967;dpr9;eya;fred;GstE11;nub;Rh3;Sox21a;stet;svp
transfac_pro__M06556	3.19	0.00645			15	89	Ank2;CG1105;CG16886;CG17230;CG31038;CG32698;CG42594;CG4341;CG6724;mesh;mRpL40;nub;SF2;thoc6;Unc-115a
transfac_pro__M00488	3.19	0.00645	Dref (directAnnotation).		718	4999	128up;312;5-HT1A;a10;Acyp2;Adk2;adp;ago;AIMP2;AIMP3;alpha4GT1;amd;angel;Ank2;AP-2mu;Aplip1;ArfGAP1;arg;arm;Art7;asf1;AsnRS;AspRS;Atg12;Atg14;Atu;aurB;ave;bai;BEAF-32;beat-VII;beg;Bem46;beta-PheRS;beta'COP;betaTub56D;bic;blot;Bmcp;bora;borr;Brd8;Brms1;BthD;Bug22;by;cactin;Cad89D;CAH1;caps;caup;Ccn;Cdc23;Cdk4;Cdk7;ced-6;CG10139;CG10205;CG10222;CG10338;CG10405;CG10435;CG10470;CG10495;CG10565;CG10576…
transfac_pro__M05600	3.18	0.00644			19	123	betaggt-I;CG11073;CG11837;CG17746;CG18208;CG42594;CG5001;CG5174;CG8910;comm;coro;eya;fred;hbn;mol;NetA;robo3;trh;Ts
cisbp__M4887	3.18	0.00644	CG9876 (directAnnotation).	Awh; E5; OdsH; Pph13; Rx; ap; ems; en; ind; otp; ro; unpg (inferredBy_MotifSimilarity).CG34367; inv; slou; zen (inferredBy_MotifSimilarity_n_Orthology).	19	136	Bmcp;byn;CG14949;CG15803;CG18208;CG18507;CG30158;CG31345;CG7011;CG9967;CheA75a;dpr9;Gld;GstE11;mspo;nub;Sox21a;stet;svp
transfac_pro__M07826	3.16	0.00642	Scr (directAnnotation).	E5; Ubx; zen; zen2 (inferredBy_MotifSimilarity).Antp; btn; pb (inferredBy_MotifSimilarity_n_Orthology).	23	176	5-HT1A;AstA;caps;Ccn;CG12164;CG13627;CG30158;CG30343;CG7720;CG8170;CG9967;Cyp4g15;fred;Ggamma30A;GstE11;hig;hng3;mspo;Muc91C;Nep4;NetA;nub;Sox21a
cisbp__M0239	3.15	0.00642		Clk (inferredBy_MotifSimilarity_n_Orthology).	218	1971	5-HT1A;AdipoR;alpha-Est9;Ank2;Aplip1;ArfGAP1;Atg12;atms;BEAF-32;beat-IIb;beat-VII;beta-PheRS;betaggt-I;bic;blot;boca;caps;Ccn;CG10338;CG10565;CG10576;CG11191;CG11417;CG11438;CG11563;CG11671;CG11911;CG12134;CG12343;CG13408;CG13743;CG13760;CG13847;CG13905;CG14082;CG14210;CG14230;CG14232;CG15019;CG15067;CG15068;CG1552;CG15601;CG15803;CG1671;CG16812;CG17278;CG17776;CG18135;CG18208;CG1885;CG2186;CG226…
yetfasco__YGL254W_69	3.09	0.00635	CG3065; CG42741; Klf15; dar1; hkb; luna (inferredBy_Orthology).		446	4393	7B2;a10;Ack;ago;Ank2;ArfGAP1;Arl1;Arp10;Art8;AspRS;Atg16;atms;aurB;ave;Aven;awd;bai;beat-IIb;beg;Bem46;beta-PheRS;beta'COP;blot;Bmcp;caps;caup;CCDC53;Ccn;ced-6;CG10133;CG10139;CG10274;CG10399;CG10654;CG10737;CG1074;CG11044;CG11099;CG11279;CG11378;CG11403;CG11409;CG11438;CG11444;CG11710;CG11808;CG11836;CG11893;CG11999;CG12107;CG12164;CG12219;CG12769;CG12909;CG12950;CG13005;CG13025;CG13123;CG13192;…
predrem__nrMotif886	3.09	0.00634			6	10	CG43333;CG9747;inaC;salr;Tsp86D;tx
cisbp__M5421	3.07	0.00633		Ets21C; Ets65A; Ets96B; aop; pnt (inferredBy_MotifSimilarity).Eip74EF; Ets97D (inferredBy_MotifSimilarity_n_Orthology).	20	132	beat-IIb;CG10131;CG14082;CG15803;CG34109;CG42339;CG42594;CG5835;eya;fred;Ggamma30A;Glut1;kek2;MESR3;Nlg4;svp;Tgi;Traf4;tx;vir-1
elemento__CCTCGCC	3.06	0.00631			18	126	arg;CG11837;CG13284;CG15803;CG2157;CG2186;CG42846;CG9411;hbn;Hmgs;kek2;Mkp3;NetA;Pfdn5;Pol32;Shal;SPARC;Tgi
flyfactorsurvey__gsb_SOLEXA_5_FBgn0001148	3.05	0.0063	gsb (directAnnotation).	Poxn; prd (inferredBy_MotifSimilarity).gsb-n (inferredBy_MotifSimilarity_n_Orthology).	10	48	BEAF-32;CenB1A;CG10778;CG12769;CG14082;CG30015;CG31176;CG32645;CG7720;sob
homer__AWTGATAAGA_ELT-3	3.05	0.0063			107	1050	AdipoR;AhcyL2;Ank2;Arfrp1;arg;beat-IIb;beat-VII;by;caup;Ccn;CenB1A;CG10086;CG10660;CG11459;CG12338;CG13284;CG13912;CG14968;CG15347;CG15803;CG16762;CG16886;CG17109;CG17202;CG17230;CG17571;CG17633;CG17746;CG17930;CG18208;CG31087;CG31176;CG31849;CG32485;CG32590;CG32813;CG34109;CG34288;CG42335;CG42339;CG42668;CG4341;CG4781;CG5346;CG5835;CG7488;CG7720;CG8027;CG9107;CG9394;CG9922;Ciao1;ckn;comm;Cyt-b5-…
jaspar__MA0029.1	3.04	0.00629		CG10348; ham (inferredBy_MotifSimilarity_n_Orthology).	109	1125	5-HT1A;AdipoR;ago;Ank2;ara;by;caps;caup;CG10086;CG10737;CG11671;CG11898;CG13284;CG13510;CG13551;CG13689;CG14356;CG14933;CG15347;CG15611;CG15674;CG1578;CG17109;CG17571;CG18135;CG18635;CG30269;CG30273;CG30343;CG3036;CG30392;CG32813;CG34194;CG42268;CG42284;CG42594;CG4781;CG5399;CG6420;CG6678;CG6959;CG7120;CG7365;CG7720;CG7800;CG7992;CG8149;CG8907;CG9497;CG9630;CG9673;CG9967;ckn;CoRest;cyr;CysRS;Cyt-…
transfac_pro__M07679	3.04	0.00629	CrebA (directAnnotation).	Atf6 (inferredBy_MotifSimilarity).Xbp1 (inferredBy_MotifSimilarity_n_Orthology).	25	159	Arl1;AspRS;CG12237;CG13901;CG14182;CG17600;CG2006;CG2310;CG31345;CG33774;CG34461;CG5861;CG7655;CysRS;DCTN2-p50;eca;GalNAc-T2;Gmap;grsm;nub;Sec61gamma;SmB;Spase12;SsRbeta;Syx5
taipale__DLX4_DBD_NYAATTAN	3.04	0.00629	Dll (inferredBy_Orthology).		16	104	5-HT1A;ara;beat-VII;CG14949;CG30158;CG30343;CG4341;CG7011;CG7720;CG9967;CheA75a;Gld;hbn;hig;stet;svp
taipale__Foxg1_DBD_RTAAAYA	3.03	0.00628	slp1 (inferredBy_Orthology).	CHES-1-like (inferredBy_MotifSimilarity).FoxK; FoxP; bin; croc; fd59A; fd96Ca; fd96Cb; fkh; foxo (inferredBy_MotifSimilarity_n_Orthology).	8	22	byn;caps;CG18135;CG32698;fred;kermit;Traf4;trpl
cisbp__M5330	3.03	0.00628	CrebA (inferredBy_Orthology).	Atf6 (inferredBy_MotifSimilarity).Xbp1 (inferredBy_MotifSimilarity_n_Orthology).	31	236	5-HT1A;Arl1;AspRS;CG12237;CG13901;CG14182;CG1486;CG17600;CG2006;CG2310;CG2852;CG31345;CG32698;CG33774;CG34461;CG7655;CG8607;CysRS;DCTN2-p50;Dscam3;eca;GalNAc-T2;Glut1;grsm;Kif19A;Sce;Sec61gamma;SmB;Spase12;SsRbeta;Traf4
cisbp__M5277	3.02	0.00627	zen2 (directAnnotation).	Awh; CG18599; E5; Scr; abd-A; ap; btn; ems; ftz; lab; lbl; otp; pb; unpg; zen (inferredBy_MotifSimilarity).	24	189	caps;Ccn;CG14949;CG30158;CG30343;CG32698;CG3530;CG4341;CG4781;CG6678;CG6959;CG8170;CG9886;CG9967;CheA75a;fred;Glut1;GstE11;hig;mspo;Rh3;Sox21a;stet;svp
cisbp__M5342	3.01	0.00626	Dll (inferredBy_Orthology).		15	94	5-HT1A;ara;beat-VII;CG30158;CG30343;CG4341;CG7011;CG7720;CG9967;CheA75a;Gld;hbn;hig;stet;svp

## Sheet: female-spec. dn CRE enrichment
motif	NES	AUC	TF_highConf	TF_lowConf	nEnrGenes	rankAtMax	enrichedGenes
cisbp__M1564	4.76	0.0176			59	359	AMPdeam;Atpalpha;bcn92;bol;br;bru1;Bsg;BuGZ;CG14883;CG18675;CG18812;CG32436;CG3301;CG42353;CG42354;CG6418;CG7332;CG9650;cnc;cpo;cpx;CrebA;CycG;dally;dbo;E2f1;Eip75B;Exo84;Fas2;Fur2;Galphaq;Glut4EF;HmgD;how;hth;Irk1;jim;kirre;lov;mahe;mamo;Mi-2;mura;orb2;Pde8;Pdp1;Ppa;ps;Rab3;Rbp6;rg;scrib;Sdc;sm;sn;spri;Syp;tara;timeout
cisbp__M0473	4.69	0.0175			42	207	18w;Abd-B;ben;br;brk;Bsg;CG12912;CG43736;CG6983;CG8031;CG9650;cnc;cpx;CtBP;Eip75B;Fur2;Glut4EF;HmgD;Hr3;hth;IP3K2;KrT95D;l(3)neo38;lov;mamo;mgl;Mi-2;nsl1;Pde8;Pdp1;Ppa;ps;Pten;rg;scrib;sina;sm;Sox14;Syp;tara;Tomosyn;Ubr3
yetfasco__YDL056W_2138	4.39	0.0168			36	165	AMPdeam;bru1;CG11030;CG30460;CG34383;CG8031;CG9650;CG9799;cher;cnc;CtBP;Exo84;Gbs-70E;Glut4EF;hth;kek1;kirre;KrT95D;mamo;Mi-2;mRpS9;pbl;Pde11;Pde6;Pde8;pes;Rbp6;retn;rg;scrib;sfl;sm;Tomosyn;Tsp;Vha44;wb
cisbp__M0090	4.39	0.0168			233	2314	18w;aay;Abd-B;Alh;Alk;AMPdeam;AP-2alpha;ArgRS-m;ASPP;Atpalpha;bcn92;beat-IIIa;BI-1;bol;br;Brf;brk;bru1;bs;Bsg;BuGZ;bun;Ca-beta;Caf1-55;CG10011;CG10055;CG10178;CG10947;CG11030;CG11537;CG11779;CG12912;CG13024;CG1358;CG13894;CG15387;CG15544;CG17839;CG18675;CG18812;CG2712;CG30394;CG30460;CG31223;CG31869;CG3209;CG3301;CG33111;CG33635;CG33970;CG34353;CG34383;CG3714;CG3982;CG42321;CG43427;CG43736;CG5793…
cisbp__M0390	4.31	0.0166			219	2122	14-3-3epsilon;14-3-3zeta;18w;Abd-B;Alh;ASPP;ATbp;Atg8a;Atpalpha;ATPsynG;bcn92;beat-IIIa;ben;bol;br;Brf;brk;bru1;bs;Bsg;bun;Ca-beta;CaMKII;casp;CG10011;CG10082;CG10348;CG10947;CG11030;CG11537;CG11791;CG1265;CG12912;CG13024;CG13075;CG13300;CG13309;CG13380;CG13894;CG14687;CG15544;CG17360;CG17839;CG18675;CG18812;CG2991;CG30394;CG31223;CG31869;CG32280;CG32281;CG33111;CG33970;CG34353;CG34383;CG3632;CG3…
cisbp__M0610	4.18	0.0163	Tet (inferredBy_Orthology).		314	3095	14-3-3epsilon;14-3-3zeta;aay;Abd-B;AGO2;Alh;Alk;alpha-Est3;alphaSnap;alrm;AMPdeam;AP-2alpha;ArgRS-m;arr;ASPP;Atpalpha;ATPsynG;bbg;bcn92;beat-IIIa;ben;BI-1;bol;br;Brf;brk;bru1;bs;Bsg;BuGZ;bun;Ca-beta;Caf1-55;Cbl;CG10011;CG10055;CG10082;CG10178;CG10348;CG10947;CG11030;CG11537;CG11779;CG12004;CG12541;CG12581;CG12912;CG13024;CG13300;CG13625;CG13876;CG13894;CG13937;CG14483;CG14995;CG15279;CG15387;CG15…
cisbp__M0092	4.14	0.0163			278	2746	18w;aay;Abd-B;Alh;Alk;alpha-Est3;AMPdeam;AP-2alpha;ArgRS-m;arr;ASPP;Atpalpha;ATPCL;ATPsynG;bbg;bcn92;beat-IIIa;BI-1;bol;Brf;brk;bru1;bs;Bsg;BuGZ;bun;Ca-beta;Caf1-55;CG10011;CG10055;CG10073;CG10178;CG10348;CG10947;CG11030;CG11537;CG11665;CG11779;CG12912;CG13024;CG13252;CG13300;CG1358;CG13625;CG13894;CG14483;CG14995;CG15014;CG15387;CG15544;CG17839;CG18675;CG18812;CG1902;CG2712;CG2991;CG30394;CG3046…
cisbp__M1570	4.02	0.016			446	4772	14-3-3epsilon;14-3-3zeta;Abd-B;Act57B;AGO2;Alh;Alk;alpha-Est10;alpha-Est3;alphaSnap;alrm;AMPdeam;Ank;AP-2alpha;arr;ASPP;Atg8a;Atpalpha;ATPCL;ATPsynG;az2;bbg;bcn92;beat-IIIa;ben;BI-1;bol;br;Brf;brk;bru1;bs;Bsg;BuGZ;bun;Ca-beta;CalpA;CaMKII;Cbl;CG10011;CG10340;CG10345;CG10348;CG10353;CG10514;CG10889;CG10947;CG11030;CG11155;CG11210;CG11360;CG11448;CG11537;CG11779;CG11791;CG11857;CG12004;CG12024;CG12…
cisbp__M0335	3.98	0.0159			29	122	AMPdeam;Atpalpha;bol;br;Bsg;CG13300;CG18812;CG34353;CG9650;Cyp4e3;how;hth;jim;lov;mamo;mgl;Mi-2;mura;Pde8;Pdp1;Pka-R2;Ppa;Rbp6;rg;scrib;Sdc;sm;Syp;timeout
cisbp__M0605	3.95	0.0158			471	4972	14-3-3epsilon;14-3-3zeta;18w;aay;Abd-B;Acn;AGO2;Alh;Alk;alpha-Est3;alphaSnap;alrm;AMPdeam;Ank;AOX3;AP-2alpha;Arf51F;arr;ASPP;Atg5;Atpalpha;ATPCL;ATPsynG;bbg;bchs;bcn92;beat-IIIa;ben;BI-1;bol;bond;br;Brf;brk;bru1;bs;Bsg;BuGZ;bun;Ca-beta;Caf1-55;CalpA;Cbl;Cdc16;CG10011;CG10055;CG10073;CG10082;CG10254;CG10345;CG10348;CG10555;CG10947;CG11030;CG11360;CG11537;CG11779;CG11961;CG12004;CG12541;CG12912;CG1…
cisbp__M0607	3.89	0.0157	Kdm2 (inferredBy_Orthology).		376	3857	14-3-3epsilon;14-3-3zeta;18w;aay;Abd-B;AGO2;Alh;Alk;alpha-Est3;alphaSnap;alrm;AMPdeam;AP-2alpha;Arf51F;arr;ASPP;Atg5;Atpalpha;ATPsynG;B9d1;bbg;bchs;bcn92;beat-IIIa;ben;BI-1;bol;br;Brf;brk;bru1;bs;Bsg;BuGZ;bun;Ca-beta;CalpA;CaMKII;Cbl;CG10011;CG10055;CG10073;CG10082;CG10254;CG10348;CG10947;CG11030;CG11360;CG11537;CG12004;CG12541;CG1265;CG12912;CG13024;CG13300;CG13625;CG13894;CG13937;CG14253;CG1448…
cisbp__M0427	3.89	0.0157	CG2790 (inferredBy_Orthology).		51	306	AMPdeam;ASPP;Atpalpha;bol;br;brk;Bsg;bun;CG11030;CG12912;CG13300;CG13625;CG17839;CG18675;CG18812;CG34353;CG43736;CG5986;CG6418;CG9650;cpx;CycG;dally;Eip75B;Exo84;Glut4EF;how;Hr3;hth;l(3)neo38;lov;mahe;mamo;mgl;orb2;pav;Pde8;Pdp1;ps;pxb;Rab10;Rbp6;rg;scrib;Sdc;sina;siz;sm;tara;timeout;Tomosyn
jaspar__MA0975.1	3.79	0.0155			75	562	14-3-3epsilon;14-3-3zeta;Abd-B;Act57B;Alh;bbg;bol;bru1;bs;Bsg;Ca-beta;Cbl;CG11537;CG12912;CG13024;CG13252;CG17839;CG18675;CG1907;CG30394;CG32103;CG33635;CG4911;CG5986;CG7616;CG8031;Cip4;cnc;COX7A;cpo;CtBP;CycG;eco;Eip75B;endos;ewg;foxo;Glut4EF;Hr3;hth;ITP;KCNQ;Kif3C;kirre;Lapsyn;lov;mamo;Mi-2;mirr;Mob2;MRP;Mtl;ND-13A;nord;orb;Pde6;Pdp1;Pu;Rab3;Rbp6;retn;Sar1;scny;scrib;Sdc;sfl;SkpA;sm;spel1;Syp;t…
tiffin__TIFDMEM0000062	3.76	0.0154			222	1854	14-3-3epsilon;14-3-3zeta;Abd-B;Act57B;aft;AGO2;Alh;Alk;AMPdeam;Ank;AP-2alpha;Arf51F;arr;Atg5;Atg8a;Atpalpha;ATPsynG;bcn92;bol;br;brk;Bsg;BuGZ;bun;calypso;CaMKII;CDK2AP1;CG10947;CG12912;CG1358;CG13876;CG13894;CG14687;CG16952;CG17360;CG17568;CG17839;CG18675;CG18812;CG1902;CG2519;CG31717;CG31997;CG3209;CG32103;CG32280;CG32281;CG3301;CG33111;CG33970;CG34353;CG34383;CG3632;CG3831;CG42321;CG42353;CG423…
cisbp__M0306	3.66	0.0152			25	108	Alk;ASPP;bol;br;BuGZ;CG34353;CG3632;CG9650;CG9911;cpx;Eip75B;foxo;Fur2;Glut4EF;lov;mamo;Mi-2;mura;Pde8;Ppa;Rbp6;scrib;Sdc;sm;Syp
cisbp__M1107	3.64	0.0152			20	70	AMPdeam;Atpalpha;bol;br;Bsg;CG13300;CG13894;CG18812;CG9650;CycG;Exo84;hth;mamo;mgl;Mi-2;Pde8;Pdp1;Rbp6;sm;timeout
transfac_pro__M07347	3.63	0.0151	ss (inferredBy_Orthology).	tgo (inferredBy_MotifSimilarity_n_Orthology).	29	144	Abd-B;Alh;ben;br;CG12912;CG34353;CG5888;CG6983;CG8031;cher;CtBP;Exo84;Glut4EF;Hr3;hth;ITP;kek1;mamo;orb;Pde8;Pdp1;Pka-R2;pxb;Rbp6;rg;Sdc;sfl;Syp;ths
cisbp__M0389	3.61	0.0151		CG2790 (inferredBy_MotifSimilarity_n_Orthology).	18	63	bol;br;brk;Bsg;CG12912;CycG;Exo84;Hr3;hth;l(3)neo38;mamo;Mi-2;Pde8;Pdp1;pxb;Rbp6;tara;timeout
elemento__ACATATG	3.6	0.0151			307	3222	14-3-3zeta;18w;Abd-B;aft;Alh;Alk;alpha-Est10;Ank;Arf51F;ArgRS-m;ASPP;ATbp;Atg5;Atg8a;Atpalpha;ATPsynG;B9d1;bbg;beat-IIIa;ben;bol;br;brk;bru1;bs;Bsg;bun;Ca-beta;calypso;CaMKII;CG10011;CG10082;CG10178;CG10353;CG10947;CG11030;CG11164;CG12004;CG12194;CG12912;CG13075;CG13894;CG14687;CG15014;CG15120;CG15170;CG15916;CG16739;CG16898;CG16952;CG17163;CG17167;CG17360;CG17568;CG17839;CG18812;CG1907;CG1943;CG…
predrem__nrMotif1646	3.57	0.015			309	2855	14-3-3epsilon;14-3-3zeta;18w;aay;Abd-B;AGO2;Alh;alpha-Est3;Ank;arr;ASPP;Atg5;Atg8a;Atpalpha;ATPCL;ATPsynG;bbg;bcn92;beat-IIIa;bol;br;Brf;bru1;bs;Bsg;BuGZ;bun;Ca-beta;CaMKII;CapaR;Cbl;CG10082;CG10254;CG10353;CG10947;CG11030;CG11309;CG11791;CG11851;CG11961;CG12004;CG1265;CG12912;CG13075;CG13252;CG13300;CG1358;CG13894;CG14131;CG14687;CG15014;CG15098;CG15387;CG16952;CG17163;CG17167;CG17360;CG17839;CG…
taipale__ONECUT1_full_NNAAAATCRATAWN	3.57	0.015	onecut (inferredBy_Orthology).		114	979	14-3-3epsilon;Abd-B;Alh;alphaSnap;AP-2alpha;ArgRS-m;ASPP;Atg8a;Atpalpha;bbg;bchs;beat-IIIa;ben;Brf;bru1;bs;Bsg;bun;Ca-beta;CG10011;CG10055;CG10137;CG10345;CG11030;CG11791;CG12194;CG12912;CG13300;CG13933;CG14883;CG15170;CG17360;CG18675;CG3301;CG33111;CG33970;CG34353;CG34383;CG43736;CG43778;CG43902;CG4662;CG4847;CG4853;CG5888;CG7728;CG7739;CG9650;Cip4;cpo;cpx;dgt6;Dyrk2;E2f1;EDTP;Eip75B;ewg;Fas2;Gl…
c2h2_zfs__M0404	3.55	0.0149			144	1293	14-3-3epsilon;14-3-3zeta;18w;Abd-B;Alh;ArgRS-m;ASPP;Atg8a;bbg;bcn92;beat-IIIa;ben;bol;br;brk;bru1;Bsg;bun;CG12194;CG12581;CG12912;CG13300;CG1358;CG15544;CG18812;CG31223;CG31769;CG33111;CG33635;CG33970;CG34353;CG3631;CG3632;CG42671;CG43102;CG43736;CG45071;CG5986;CG6024;CG6983;CG7115;CG7510;CG8031;CG9650;CG9911;cnc;cpx;CrebA;CtBP;cv;CycG;Cyp4e3;Cyp6a18;Cyp6d5;dally;DNApol-epsilon255;Drep2;Eip75B;en…
cisbp__M0029	3.54	0.0149			65	459	14-3-3epsilon;14-3-3zeta;Abd-B;Act57B;Alh;bbg;bol;bru1;bs;Bsg;bun;Cbl;CG12912;CG13024;CG13252;CG17839;CG18675;CG1907;CG30394;CG4911;CG5986;CG7616;CG8031;Cip4;cnc;COX7A;cpo;CtBP;CycG;eco;Eip75B;foxo;Hr3;hth;KCNQ;Kif3C;kirre;Lapsyn;lov;mamo;Mi-2;Mob2;MRP;Mtl;ND-13A;nord;orb;Pde6;Pdp1;Pu;Rbp6;retn;Sar1;scny;scrib;sfl;SkpA;sm;spel1;Syp;tara;ths;twin;Vha55;wb
cisbp__M0432	3.47	0.0148			394	4018	14-3-3epsilon;14-3-3zeta;18w;aay;Abd-B;Act57B;AGO2;Alh;Alk;alpha-Est3;alrm;AMPdeam;Arf51F;ArgRS-m;arr;ASPP;Atpalpha;ATPCL;ATPsynG;B9d1;bbg;bcn92;beat-IIIa;ben;BI-1;bol;bond;br;Brf;brk;bru1;bs;Bsg;BuGZ;bun;c11.1;Ca-beta;Caf1-55;Cbl;Cdc2rk;CG10011;CG10082;CG10178;CG10345;CG10348;CG10559;CG10947;CG11030;CG11537;CG11779;CG12541;CG12581;CG1265;CG12912;CG13024;CG13300;CG1358;CG13625;CG13894;CG13937;CG1…
cisbp__M0434	3.43	0.0147			40	194	18w;ASPP;br;brk;bru1;bun;CG12912;CG33970;CG34353;CG3632;CG43736;CG6983;CG8031;CG9650;CG9911;CtBP;Eip75B;Glut4EF;HmgD;Hr3;hth;Inx3;IP3K2;l(3)neo38;lov;mamo;mgl;Mi-2;Ppa;Rbp6;rg;scrib;sd;sina;sm;Sox14;Syp;Tomosyn;tyf;Ubr3
cisbp__M0945	3.41	0.0146			30	148	AMPdeam;Atpalpha;bol;br;Bsg;CG12912;CG13300;CG13894;CG18675;CG6418;CG9650;cpx;Eip75B;Hr3;hth;kirre;mahe;mamo;mew;mgl;Nrg;Pde8;Pdp1;Pka-R2;Rbp6;rg;sm;tara;timeout;Ubr3
homer__TBGCACGCAA_Arnt_Ahr	3.41	0.0146	ss; tgo (inferredBy_Orthology).		17	63	Abd-B;beat-IIIa;br;CG12912;CG5888;CG6983;CG8031;CtBP;dally;Glut4EF;Hr3;otp;Pde6;Ppa;Sdc;sm;Ubr3
predrem__nrMotif2061	3.37	0.0146			442	4329	14-3-3epsilon;14-3-3zeta;18w;aay;Abd-B;Act57B;aft;AGO2;Alh;Alk;alpha-Est10;alpha-Est3;alphaSnap;alphaTub85E;Ank;AP-2alpha;Arf51F;arr;ASPP;ATbp;Atg101;Atg5;Atg8a;Atpalpha;ATPCL;ATPsynG;B9d1;bbg;bchs;bcn92;beat-IIIa;BI-1;bol;br;Brf;brk;bru1;bs;Bsg;BuGZ;bun;Ca-beta;CaMKII;Cbl;CDK2AP1;CG10011;CG10166;CG10345;CG10348;CG10353;CG10947;CG11030;CG11155;CG11164;CG11210;CG11263;CG11309;CG11537;CG11779;CG120…
cisbp__M1576	3.36	0.0145			21	83	AMPdeam;Atpalpha;bol;br;Bsg;CG13300;CG13894;CG18812;CG9650;CycG;Eip75B;Exo84;hth;mamo;mgl;Mi-2;Pde8;Pdp1;Rbp6;sm;timeout
cisbp__M0650	3.35	0.0145			15	47	AMPdeam;br;Bsg;CG13894;CG18675;CG9650;CycG;hth;mamo;Mi-2;Pde8;Pdp1;Rbp6;scrib;sm
transfac_pro__M05581	3.34	0.0145			11	18	Abd-B;CG14961;CG14969;CG17360;CkIalpha;l(3)neo38;mahe;sm;tara;Tomosyn;wake
cisbp__M0580	3.33	0.0145			100	816	Abd-B;Alh;AMPdeam;ASPP;bcn92;bol;br;bru1;bs;Bsg;bun;CG13300;CG13625;CG13894;CG18812;CG1907;CG30394;CG30460;CG34383;CG43736;CG4747;CG5177;CG5986;CG6418;CG6983;CG8031;CG9265;CG9650;CG9799;Clect27;Clk;cpo;CtBP;CycG;dally;Dhc36C;DIP-eta;Eip75B;Exo84;fand;foxo;Gbs-70E;gem;Glut4EF;HmgD;hth;Irk1;ITP;KCNQ;kek1;Kif3C;kirre;Klp10A;KrT95D;l(3)neo38;lov;mamo;Manf;mgl;mi;Mi-2;Mob2;Mp20;mura;Nprl3;orb;orb2;pbl…
cisbp__M5695	3.31	0.0144	onecut (inferredBy_Orthology).		106	904	14-3-3epsilon;Abd-B;Alh;AP-2alpha;ArgRS-m;ASPP;Atg8a;Atpalpha;bbg;beat-IIIa;ben;Brf;bru1;bs;Bsg;bun;Ca-beta;CG10011;CG10055;CG10137;CG10345;CG11030;CG11791;CG12194;CG12912;CG13300;CG14883;CG15170;CG17360;CG18675;CG3301;CG33111;CG33970;CG34353;CG34383;CG43736;CG43778;CG43902;CG4847;CG4853;CG5888;CG7728;CG7739;CG9650;Cip4;cpo;cpx;dgt6;Dyrk2;EDTP;ewg;Fas2;Glut4EF;gol;Hr3;hth;Ide;INPP5E;iPLA2-VIA;kir…
elemento__CACACGCA	3.28	0.0144			109	954	14-3-3epsilon;18w;Abd-B;Alh;Alk;ArgRS-m;ASPP;Atg8a;bbg;beat-IIIa;ben;bol;br;brk;bru1;Bsg;bun;CG10555;CG11164;CG12581;CG12912;CG18675;CG18812;CG31223;CG31769;CG33111;CG33635;CG34353;CG43102;CG43736;CG45071;CG5888;CG5986;CG6983;CG7510;CG8031;CG9650;cnc;cpo;cpx;CtBP;CycG;Cyp4e3;Cyp6d5;Dlic;Drep2;Eip75B;fand;flw;foxo;Glut4EF;Gp150;HmgD;homer;Hr3;hth;Inx3;IP3K2;jumu;KCNQ;kirre;Klp10A;KrT95D;l(2)k09913…
cisbp__M0898	3.26	0.0143			314	3305	14-3-3epsilon;14-3-3zeta;Aac11;Abd-B;AGO2;Alh;Alk;alpha-Est10;alpha-Est3;alphaSnap;AMPdeam;AP-2alpha;arr;ASPP;Atpalpha;ATPsynG;bbg;bchs;bcn92;beat-IIIa;ben;BI-1;bol;br;Brf;brk;bru1;bs;Bsg;BuGZ;bun;Ca-beta;CaMKII;Cbl;CG10011;CG10082;CG10254;CG11030;CG11164;CG11360;CG12004;CG12541;CG12912;CG13024;CG13252;CG13300;CG1358;CG13625;CG13894;CG13937;CG14253;CG15387;CG15408;CG15544;CG16739;CG16898;CG17568;…
cisbp__M0737	3.25	0.0143	fd96Ca; fd96Cb (inferredBy_Orthology).	slp1 (inferredBy_MotifSimilarity).bin; croc; fd59A; fkh; foxo (inferredBy_MotifSimilarity_n_Orthology).	17	63	CaMKII;CG17839;CG3632;CG4911;CG9911;cher;ci;Fur2;Galphas;mamo;pes;Ppa;ps;Pten;Rbp6;retn;scrib
cisbp__M5694	3.23	0.0143	onecut (inferredBy_Orthology).		45	287	14-3-3epsilon;Alh;Atg8a;ben;Brf;bs;CG10055;CG10137;CG10345;CG12912;CG13300;CG14883;CG3301;CG33970;CG34353;CG7739;CG9650;cpx;dgt6;EDTP;ewg;Glut4EF;Hr3;hth;kirre;l(3)neo38;Mob2;Nhe2;Pde8;plx;ps;Rab3;Reph;Ric;Sdc;siz;sm;sn;Syp;trc;Uba1;Ube3a;vimar;wb;wnd
taipale__ONECUT2_DBD_NNAAAATCRATAWN	3.23	0.0142	onecut (inferredBy_Orthology).		123	1107	14-3-3epsilon;Abd-B;Alh;AP-2alpha;ArgRS-m;ASPP;Atg8a;Atpalpha;bbg;bchs;beat-IIIa;ben;Brf;bru1;bs;bun;Ca-beta;CG10011;CG10055;CG10137;CG10345;CG11030;CG11791;CG12194;CG12912;CG13300;CG1358;CG13933;CG14883;CG15170;CG17360;CG18675;CG1943;CG30460;CG3301;CG33111;CG33970;CG34353;CG34383;CG3699;CG43736;CG43778;CG43902;CG4847;CG4853;CG5888;CG7149;CG7728;CG7739;CG8195;CG9650;Cip4;cpo;cpx;dgt6;DIP-eta;Dyrk…
transfac_pro__M07520	3.22	0.0142			25	119	14-3-3epsilon;bol;CG12912;CG1907;CG30394;CG5986;CG8031;Cip4;cnc;CtBP;dbo;eco;Gp150;Hr3;lov;mamo;Mob2;MTA1-like;pall;Rbp6;siz;SkpA;tara;Vha55;wb
transfac_pro__M06127	3.22	0.0142	CG7372 (inferredBy_Orthology).		416	4358	14-3-3epsilon;ABCB7;Abd-B;abs;Acox57D-p;alpha-Est3;alphaSnap;alphaTub85E;AMPdeam;ArgRS-m;arr;ASPP;ATbp;Atpalpha;ATPCL;bbg;bchs;beat-IIIa;betaTub85D;bgcn;bol;br;Brf;bru1;bs;Bsg;BuGZ;bun;Ca-beta;Cals;CaMKII;Cand1;CapaR;casp;Cbl;CG10026;CG10137;CG10166;CG10348;CG10353;CG10880;CG10947;CG11030;CG11537;CG11857;CG11892;CG11980;CG12541;CG12581;CG12912;CG13024;CG13075;CG1317;CG13300;CG13380;CG13449;CG1358…
cisbp__M1221	3.22	0.0142			16	57	Atpalpha;bol;br;Bsg;CG18812;CycG;Eip75B;hth;mamo;mgl;Pde8;Pdp1;Pka-R2;Rbp6;sm;timeout
predrem__nrMotif1049	3.22	0.0142			60	446	14-3-3epsilon;Atg5;Atpalpha;ATPCL;bol;br;Bsg;CG10348;CG15544;CG16898;CG18675;CG31769;CG42306;CG42321;CG43736;CG46025;CG6293;CG7694;cnc;cpo;CycG;dally;Drep2;E2f1;Eip75B;gem;Gint3;Glut4EF;h;HmgD;hth;ITP;jim;KCNQ;kirre;lov;mgl;Mi-2;mts;Nelf-E;Nmt;Nrx-IV;orb;orb2;otp;p130CAS;Pde8;ps;Pu;Rbp6;retn;RhoGAP71E;Sdc;Sem1;siz;sm;stv;Syp;Vha68-2;Wnt6
cisbp__M5696	3.21	0.0142	onecut (inferredBy_Orthology).		131	1183	14-3-3epsilon;Abd-B;Alh;AP-2alpha;ArgRS-m;ASPP;Atg8a;Atpalpha;bbg;bchs;beat-IIIa;ben;Brf;bru1;bs;Bsg;bun;Ca-beta;CG10011;CG10055;CG10137;CG10345;CG10348;CG11030;CG11791;CG11961;CG12194;CG12912;CG13300;CG1358;CG13933;CG14883;CG15170;CG17360;CG18675;CG1943;CG30460;CG3301;CG33111;CG33970;CG34353;CG34383;CG3699;CG43736;CG43778;CG43902;CG4847;CG4853;CG5888;CG7149;CG7694;CG7728;CG7739;CG8195;CG9650;Cip…
flyfactorsurvey__Opa_SANGER_5_FBgn0003002	3.21	0.0142	opa (directAnnotation).		84	636	14-3-3epsilon;Abd-B;Act57B;Alh;ASPP;Atpalpha;bbg;ben;bol;br;bru1;Bsg;bun;Cbl;CG10348;CG11030;CG12024;CG12194;CG12912;CG13300;CG15544;CG17568;CG18812;CG34353;CG42353;CG42354;CG5888;CG5986;CG6418;CG7966;CG9650;Cip4;Clect27;cnc;cpo;CycG;dally;Dyrk2;E2f1;Eip75B;Exo84;Fas2;foxo;Glut4EF;how;Hr3;hth;IP3K2;ITP;KCNQ;Kif3C;kirre;l(3)neo38;Lapsyn;lqf;mamo;Mo25;Mob2;mts;mura;numb;orb;orb2;pbl;pic;Pka-R2;ppk;…
predrem__nrMotif1873	3.2	0.0142			18	76	AMPdeam;bol;bs;CG33970;CG34383;CG3714;cpo;dally;Glut4EF;ihog;Inx3;jumu;Lapsyn;mamo;Sdc;Syp;tara;tim
taipale__ONECUT1_DBD_NNAAAATCRATAWN_repr	3.2	0.0142	onecut (inferredBy_Orthology).		44	272	14-3-3epsilon;Alh;Atg8a;ben;Brf;bs;CG10055;CG10137;CG10345;CG12912;CG13300;CG14883;CG3301;CG33970;CG34353;CG7739;CG9650;cpx;dgt6;EDTP;ewg;Glut4EF;Hr3;hth;kirre;l(3)neo38;Mob2;Nhe2;Pde8;plx;ps;Rab3;Reph;Ric;Sdc;siz;sm;sn;Syp;trc;Uba1;Ube3a;vimar;wnd
transfac_pro__M07845	3.2	0.0142	onecut (directAnnotation).		83	645	14-3-3epsilon;Alh;AP-2alpha;ASPP;Atg8a;Atpalpha;beat-IIIa;ben;Brf;bru1;bs;bun;CG10011;CG10055;CG10137;CG10345;CG12912;CG13300;CG14883;CG18675;CG30460;CG3301;CG33111;CG33970;CG34353;CG5888;CG6126;CG7728;CG7739;CG9650;Cip4;cpo;cpx;dgt6;EDTP;Eip75B;ewg;gb;Glut4EF;gol;Hr3;hth;INPP5E;kirre;l(3)neo38;lov;mamo;mew;mfrn;mgl;Mob2;Myo31DF;Nhe2;nord;Pde8;Pdp1;Pka-R2;plx;porin;ps;Rab3;Rbp6;Reph;rg;Ric;Rtnl1;…
cisbp__M0294	3.2	0.0142	CrebB (inferredBy_Orthology).		20	91	AMPdeam;Atpalpha;bol;br;Bsg;CG13300;CG18812;CG9650;CycG;Exo84;hth;mamo;mgl;Pde8;Pdp1;Rbp6;rg;sm;tara;timeout
cisbp__M0604	3.19	0.0142			337	3276	14-3-3epsilon;14-3-3zeta;Abd-B;AGO2;Alh;Alk;alphaSnap;alrm;AMPdeam;AOX3;AP-2alpha;Arf51F;arr;ASPP;Atg5;Atpalpha;ATPsynG;bbg;bchs;bcn92;beat-IIIa;ben;BI-1;bol;bond;br;Brf;brk;bru1;bs;Bsg;BuGZ;bun;Ca-beta;Caf1-55;CalpA;CaMKII;Cbl;Cdc16;CG10011;CG10055;CG10082;CG10178;CG10348;CG10947;CG11030;CG11360;CG11537;CG11779;CG12004;CG12541;CG12912;CG13024;CG13300;CG13894;CG13937;CG14253;CG14598;CG14687;CG149…
stark__VCACGCRH	3.19	0.0142			76	589	aay;Abd-B;ArgRS-m;beat-IIIa;ben;br;brk;bru1;bs;Bsg;BuGZ;CG10555;CG12912;CG34353;CG45071;CG46025;CG5888;CG5986;CG6983;CG7220;CG7510;CG8031;CG9650;cpo;CtBP;CycG;Cyp4e3;Cyp6d5;dally;Eip75B;ewg;flw;gem;Glut4EF;Hr3;hth;ITP;kek1;kirre;KrT95D;l(3)neo38;lov;mamo;mgl;Mi-2;nsl1;otp;Pde11;Pde6;Pde8;Pdp1;Pka-R2;Ppa;Prx5;pxb;QIL1;Rbp6;retn;rg;scrib;Sdc;sina;SLO2;smt3;sn;spri;Syp;tara;ths;timeout;Tomosyn;Trf4-…
predrem__nrMotif1407	3.18	0.0141			20	88	bru1;bs;CG10055;CG31769;CG34353;CG3831;CG3940;CG9650;Fas2;KCNQ;kirre;mats;mura;Nrg;Pde11;Rbp6;retn;Ric;tyn;Vha44
jaspar__MA1053.1	3.17	0.0141			45	289	14-3-3epsilon;Abd-B;Act57B;bbg;bol;Cbl;CG12912;CG18675;CG1907;CG30394;CG4911;CG5986;CG8031;Cip4;cnc;CtBP;eco;endos;ewg;fog;foxo;Gp150;Hr3;hth;Kif3C;kirre;Lapsyn;lov;mamo;Mob2;MRP;MTA1-like;Mtl;nord;Pdp1;Rbp6;retn;scny;siz;SkpA;tara;ths;twin;Vha55;wb
cisbp__M1742	3.16	0.0141			25	122	br;CG12004;CG13024;CG31769;CG33635;CG5888;CG6418;CtBP;CycG;Dyrk2;Glut4EF;kek1;l(3)neo38;mamo;Mi-2;mirr;orb2;Pde11;Pde8;Rbp6;Sesn;sm;tara;timeout;tj
cisbp__M0618	3.16	0.0141			406	4108	14-3-3epsilon;14-3-3zeta;18w;Aac11;Abd-B;Acn;Act57B;AGO2;Alh;Alk;alphaSnap;alrm;AMPdeam;Ank;AP-2alpha;Arf51F;arr;ASPP;Atg5;Atg8a;Atpalpha;ATPsynG;az2;bbg;bchs;bcn92;beat-IIIa;ben;BI-1;bol;bond;br;bru1;bs;Bsg;bun;Ca-beta;Caf1-55;CalpA;CapaR;Cdc16;CG10011;CG10055;CG10082;CG10226;CG10345;CG10348;CG10555;CG10947;CG11030;CG11360;CG11537;CG11779;CG12004;CG12024;CG1239;CG12541;CG12912;CG13024;CG13300;CG…
cisbp__M0537	3.15	0.0141			18	80	ASPP;beat-IIIa;br;bun;CG12912;CG34353;CG4662;Cpr31A;Diedel3;E2f1;Eip75B;Hr3;hth;l(3)neo38;lov;Rbp6;spz3;tara
jaspar__MA0123.1	3.15	0.0141			25	118	bol;br;Bsg;bun;Cbl;CG12912;CG18675;CG8031;CtBP;dally;Eip75B;fog;Hr3;lov;mahe;Mob2;Mtl;Pdp1;Rbp6;scny;siz;sm;tara;Vha55;wb
cisbp__M4231	3.15	0.0141			63	428	Abd-B;Arf51F;bbg;beat-IIIa;bru1;CG10011;CG12581;CG13024;CG15544;CG17360;CG3209;CG3308;CG33111;CG33970;CG34353;CG3714;CG42321;CG4452;CG6293;CG6983;CG7131;CG7616;CG8031;CG8379;CG9986;CtBP;Cyp4e3;dally;Eip75B;flw;Galphaq;Glut4EF;godzilla;h;HmgD;homer;how;Hsl;hth;jim;l(3)05822;l(3)neo38;ldlCp;mamo;Mi-2;ND-B14.5B;nuf;Opa1;otp;Pkc53E;Ppa;ps;pxb;Rab1;Rbp6;retn;rg;siz;sm;Syp;tara;timeout;Ubr3
cisbp__M0413	3.15	0.0141			12	29	beat-IIIa;br;bru1;CG12912;CG6983;CG8031;CtBP;Hr3;kek1;Ppa;sina;Syp
cisbp__M1781	3.13	0.014			107	889	14-3-3epsilon;Abd-B;Alh;ArgRS-m;bcn92;beat-IIIa;BI-1;bol;bru1;bs;bun;CG11030;CG11537;CG12863;CG12912;CG15544;CG18675;CG2519;CG30460;CG33111;CG33635;CG34353;CG3437;CG34383;CG43102;CG4747;CG5177;CG5789;CG6142;CG6293;CG7149;CG7154;CG9650;cher;Cip4;Clect27;cnc;CrebA;CtBP;CycG;DIP-eta;Drep2;Eip75B;Exo84;foi;foxo;Gbs-70E;gem;Glut4EF;h;HmgD;Hr3;Hsc70Cb;hth;ITP;Kif3C;kirre;KrT95D;l(3)neo38;mamo;Manf;mgl;…
jaspar__MA0298.1	3.12	0.014	CG3065; CG42741; Klf15; dar1; hkb; luna (inferredBy_Orthology).		29	165	AMPdeam;Atpalpha;bol;br;Bsg;bun;CG12541;CG12912;CG18675;CG18812;CG31769;CG9650;cpx;CycG;Eip75B;Hr3;hth;mamo;mgl;orb2;Pde8;Pdp1;ps;Rbp6;rg;RNaseX25;sm;Syp;timeout
cisbp__M0614	3.12	0.014			348	3449	14-3-3epsilon;14-3-3zeta;Abd-B;AGO2;Alh;Alk;alpha-Est3;alphaSnap;alrm;AMPdeam;AP-2alpha;Arf51F;arr;ASPP;Atpalpha;ATPsynG;bbg;bchs;bcn92;beat-IIIa;ben;BI-1;bol;br;Brf;brk;bru1;bs;Bsg;BuGZ;bun;Ca-beta;CalpA;Cbl;CG10055;CG10348;CG10947;CG11030;CG11360;CG11537;CG11779;CG12004;CG12541;CG1265;CG12912;CG13024;CG13300;CG13625;CG13894;CG13937;CG14253;CG14995;CG15014;CG15387;CG15408;CG15544;CG16739;CG18675…
cisbp__M0089	3.12	0.014			212	1958	18w;aay;Abd-B;Alh;Alk;AMPdeam;ArgRS-m;ASPP;Atpalpha;ATPsynG;bbg;bcn92;BI-1;bol;Brf;bru1;bs;BuGZ;bun;Caf1-55;CG10011;CG10055;CG10178;CG10947;CG11030;CG11537;CG11779;CG12912;CG13024;CG13300;CG14483;CG15544;CG17839;CG18812;CG30394;CG30460;CG31223;CG31869;CG3209;CG32103;CG3301;CG33111;CG33635;CG33970;CG34353;CG34383;CG3714;CG42321;CG43427;CG43736;CG46025;CG5986;CG6055;CG6293;CG6418;CG6983;CG7099;CG71…
cisbp__M0503	3.1	0.014			221	2100	Abd-B;Act57B;AGO2;Alh;Alk;AMPdeam;Ank;Atpalpha;az2;B9d1;bbg;bcn92;ben;BI-1;bol;br;bru1;bs;Bsg;BuGZ;bun;Ca-beta;Cbl;CG10011;CG10073;CG10254;CG10345;CG10348;CG11030;CG11360;CG11448;CG12004;CG12581;CG12912;CG13024;CG13252;CG13300;CG13398;CG13894;CG14253;CG14589;CG15098;CG15387;CG15544;CG17568;CG18675;CG18812;CG30394;CG31751;CG32280;CG32281;CG32732;CG3301;CG33111;CG33635;CG34353;CG34383;CG42671;CG431…
cisbp__M1737	3.1	0.014			17	65	AMPdeam;Atpalpha;bol;br;CG13300;CG18675;CG18812;CG9650;CycG;Eip75B;hth;mamo;Pde8;Pdp1;Rbp6;sm;timeout
cisbp__M0662	3.09	0.0139			17	67	AMPdeam;br;Bsg;CG13300;CG13894;CG18675;CG9650;CycG;Eip75B;hth;mamo;Mi-2;Pde8;Pdp1;Rbp6;scrib;sm
cisbp__M0582	3.06	0.0139			160	1470	aay;Abd-B;Alh;AMPdeam;AP-2alpha;AP-2sigma;ArgRS-m;ASPP;Atpalpha;bbg;bcn92;bol;bond;bru1;bs;Bsg;bun;Caf1-55;CG10178;CG10321;CG10348;CG10947;CG11537;CG11779;CG12912;CG13300;CG13876;CG14483;CG15544;CG17839;CG18675;CG18812;CG30460;CG31223;CG3301;CG33111;CG34353;CG34383;CG46025;CG4911;CG5888;CG5986;CG6055;CG6418;CG6983;CG7220;CG7510;CG7966;CG8031;CG9265;CG9650;CG9799;cher;Cip4;cnc;cpo;CrebA;CtBP;Cyp6d…
transfac_pro__M03190	3.05	0.0138			13	47	Bsg;CG15014;CG8031;Cip4;CtBP;hth;mamo;orb2;Pdp1;Rbp6;Sdc;Ugt37b1;Vha55
transfac_pro__M07692	3.05	0.0138	vri (directAnnotation).	CG7786; Pdp1; REPTOR-BP; gt; hng1 (inferredBy_MotifSimilarity).	21	104	ATPsynF;br;bun;CG12912;CG17568;CG4911;Clect27;Eip75B;frac;Glut4EF;Hr3;hth;LanA;lov;ND-B14.5B;ogre;Pdp1;porin;Rbp6;rg;Syp
cisbp__M0682	3.04	0.0138			176	1520	14-3-3zeta;18w;Abd-B;Alh;Alk;ASPP;Atg8a;Atpalpha;ATPsynG;bcn92;ben;bol;br;brk;bru1;bs;Bsg;bun;Ca-beta;CaMKII;CDK2AP1;CG10348;CG10947;CG11030;CG12912;CG13252;CG1358;CG13625;CG14687;CG16739;CG17360;CG17568;CG17839;CG18675;CG18812;CG1902;CG1943;CG30394;CG31717;CG33111;CG33229;CG33970;CG34353;CG34383;CG3632;CG3714;CG42353;CG42354;CG43102;CG43736;CG43778;CG43902;CG45071;CG5986;CG6024;CG6770;CG7646;CG8…
cisbp__M0576	3.04	0.0138	danr (directAnnotation).		185	1745	14-3-3epsilon;Abd-B;Alh;Alk;arr;ASPP;Atpalpha;bbg;bcn92;BI-1;bol;br;Brf;bru1;bs;Bsg;bun;Ca-beta;CG10055;CG10178;CG10947;CG11030;CG11779;CG12004;CG12912;CG13300;CG13625;CG13894;CG13937;CG15544;CG18675;CG18812;CG1907;CG30394;CG30460;CG31223;CG31869;CG32280;CG32281;CG3301;CG33111;CG34353;CG34383;CG42321;CG42671;CG43736;CG4747;CG5177;CG5986;CG6055;CG6142;CG6418;CG6770;CG6983;CG7099;CG8031;CG8032;CG92…
cisbp__M1943	3.04	0.0138			24	115	bol;br;bun;Cbl;CG12912;CG18675;CG8031;CtBP;dally;Eip75B;fog;Hr3;lov;mahe;Mob2;Mtl;Pdp1;Rbp6;scny;siz;sm;tara;Vha55;wb
cisbp__M1216	3.04	0.0138			25	121	Abd-B;AMPdeam;bol;br;bru1;CG13894;CG18675;CG18812;CG6418;CG9650;CycG;dally;Eip75B;frac;gem;Glut4EF;hth;jim;mamo;Mi-2;Pde8;Ppa;Rbp6;sm;Vha68-2
cisbp__M1571	3.03	0.0138			469	4870	14-3-3epsilon;14-3-3zeta;18w;Abd-B;Act57B;AGO2;Alh;Alk;alpha-Est10;alpha-Est3;alphaSnap;alrm;AMPdeam;AP-2alpha;arr;ASPP;Atg5;Atg8a;Atpalpha;ATPCL;ATPsynG;az2;bbg;bcn92;beat-IIIa;ben;BI-1;bol;br;brk;bru1;bs;Bsg;BuGZ;bun;Ca-beta;Caf1-55;CalpA;CaMKII;casp;Cbl;CG10011;CG10073;CG10348;CG10514;CG10947;CG11030;CG11155;CG11164;CG11210;CG11360;CG11537;CG11665;CG11857;CG12004;CG12024;CG12194;CG12581;CG1274…
cisbp__M1782	3.03	0.0138			433	4771	14-3-3epsilon;14-3-3zeta;18w;Abd-B;Acn;Act57B;AGO2;Alh;Alk;alphaSnap;alrm;AMPdeam;AP-2alpha;ArgRS-m;arr;ASPP;Atg5;Atpalpha;ATPCL;ATPsynG;B9d1;bbg;bchs;bcn92;beat-IIIa;ben;BI-1;bol;bond;br;Brf;brk;bru1;bs;Bsg;BuGZ;bun;Ca-beta;Caf1-55;CalpA;CaMKII;Cbl;Cdc16;CG10011;CG10055;CG10073;CG10178;CG10345;CG10348;CG10353;CG10947;CG11030;CG11537;CG11779;CG12004;CG12541;CG12912;CG13024;CG13300;CG13625;CG13876…
predrem__nrMotif1684	3.01	0.0138			40	233	14-3-3epsilon;Atg8a;B9d1;bol;bru1;Cbl;CG10082;CG10254;CG12912;CG30394;CG32276;CG34353;CG5009;CG5986;CG6707;CG7878;CG7966;CG9628;CG9650;CycG;Dlic;exu;Glut4EF;gry;Hr3;hth;kirre;lov;mahe;mamo;Mob2;MTA1-like;nsl1;NTPase;pic;Pis;Rbp6;reb;tral;tyf
transfac_pro__M02838	3	0.0137			26	125	Abd-B;Alh;Atpalpha;br;bs;CG33970;CG34353;CG3632;CG4830;CG6024;CG9650;CG9911;Ctr1A;Duox;kirre;lov;mamo;mgl;Mi-2;mirr;Ppa;Pten;Rbp6;rg;sd;Sox14

## Sheet: male-spec. up CRE enrichment
motif	NES	AUC	TF_highConf	TF_lowConf	nEnrGenes	rankAtMax	enrichedGenes
transfac_pro__M07733	7.29	0.0214	srp (directAnnotation).	grn (inferredBy_MotifSimilarity).GATAd; GATAe; pnr (inferredBy_MotifSimilarity_n_Orthology).	290	4867	Abi;AcCoAS;Acph-1;Aldh;alph;alpha-Est5;alpha-Est8;Amnionless;AnxB9;Arpc2;aru;ast;Atg17;Bacc;BicD;bmm;bru2;bur;bves;cert;cg;CG10051;CG10337;CG10479;CG10527;CG10911;CG10960;CG10962;CG11149;CG11151;CG11241;CG11317;CG11357;CG11594;CG11737;CG11912;CG12065;CG13102;CG13255;CG13325;CG13585;CG13618;CG13654;CG13887;CG14245;CG14499;CG14502;CG14629;CG1468;CG14688;CG14945;CG15093;CG15126;CG15152;CG15423;CG154…
cisbp__M4600	6.94	0.0206	grn (inferredBy_Orthology).	CycT; HLH3B; pnr (inferredBy_MotifSimilarity_n_Orthology).	286	4986	AcCoAS;Adh;Adhr;Akt1;Aldh;alpha-Est5;alpha-Est8;Amnionless;AnxB9;Arpc2;aru;Atg17;Atg3;atk;bmm;bru2;bves;CAHbeta;Cdc42;cert;cg;CG10337;CG10479;CG10512;CG10527;CG10911;CG10960;CG11151;CG11241;CG11317;CG11594;CG11737;CG11899;CG11912;CG12057;CG12065;CG13102;CG13255;CG13325;CG13516;CG13618;CG13654;CG14196;CG14245;CG14499;CG14502;CG14629;CG14688;CG14945;CG15093;CG15126;CG15152;CG15423;CG1544;CG15553;CG…
hocomoco__GATA2_HUMAN.H10MO.A	6.7	0.0201	grn (inferredBy_Orthology).	CycT; HLH3B; Sirt6; pnr (inferredBy_MotifSimilarity_n_Orthology).	271	4868	AcCoAS;Adh;Adhr;Akt1;Aldh;alph;alpha-Est5;Amnionless;AnxB9;Arpc2;aru;Atg17;Atg3;atk;Best2;BicD;bmm;bru2;bves;CAHbeta;cert;cg;CG10051;CG10337;CG10479;CG10512;CG10527;CG10960;CG11151;CG11241;CG11317;CG11357;CG11594;CG11737;CG11899;CG11912;CG12065;CG13102;CG13255;CG13325;CG13516;CG13618;CG13654;CG14196;CG14245;CG14499;CG14502;CG14629;CG14688;CG14945;CG15093;CG15126;CG15152;CG15423;CG1544;CG15553;CG1…
scertf__zhu.GAT1	6.34	0.0192	GATAd; GATAe; grn; pnr; srp (inferredBy_Orthology).		280	4758	Abi;AcCoAS;agt;Aldh;alph;alpha-Est5;alpha-Est8;Amnionless;Arpc2;aru;ast;Atet;Atg17;Bacc;bbc;BicD;bmm;bru2;bur;CAHbeta;cert;CG10051;CG10337;CG10479;CG10512;CG10911;CG10960;CG11151;CG11241;CG11317;CG11399;CG11594;CG11737;CG11899;CG11912;CG12057;CG12065;CG13102;CG13255;CG13325;CG13397;CG13654;CG13887;CG14245;CG14435;CG14439;CG14499;CG14502;CG14629;CG14688;CG14945;CG15093;CG15126;CG15423;CG1544;CG155…
homer__CAGATAAGGN_Gata1	6.04	0.0185	grn (inferredBy_Orthology).	CycT; HLH3B; pnr (inferredBy_MotifSimilarity_n_Orthology).	275	4718	Abi;AcCoAS;Adh;Adhr;Aldh;alpha-Est5;alpha-Est8;Amnionless;AnxB9;Arpc2;aru;Atg17;atk;Best2;BicD;bmm;bru2;bur;bves;CAHbeta;cert;cg;CG10051;CG10337;CG10479;CG10512;CG10527;CG10960;CG11151;CG11241;CG11317;CG11594;CG11737;CG11912;CG12065;CG12811;CG13102;CG13255;CG13325;CG13585;CG13618;CG13654;CG14196;CG14245;CG14499;CG14502;CG14629;CG14688;CG14945;CG15093;CG15126;CG15152;CG15423;CG1544;CG15553;CG15579…
taipale__HNF4A_full_RRGGTCAAAGTCCRNN_repr	5.84	0.018	Hnf4 (inferredBy_Orthology).	Hr78; svp; usp (inferredBy_MotifSimilarity_n_Orthology).	208	4033	Abi;AcCoAS;Adh;Adhr;Aldh;alph;alpha-Est8;Arc42;AstC;Atet;bbc;BicD;bmm;bru2;bves;cert;CG10126;CG10237;CG10479;CG10663;CG10960;CG11151;CG11317;CG11357;CG11737;CG11843;CG12012;CG12065;CG13325;CG13516;CG13887;CG14196;CG1441;CG15423;CG15553;CG15771;CG16727;CG17019;CG17292;CG17549;CG17597;CG18609;CG1889;CG2604;CG2865;CG30010;CG31145;CG31267;CG31324;CG3149;CG31522;CG3164;CG31694;CG32054;CG32549;CG32647;…
tiffin__TIFDMEM0000040	5.83	0.018		pnr (inferredBy_MotifSimilarity_n_Orthology).	263	4595	Abi;AcCoAS;Akt1;Aldh;alph;alpha-Est5;alpha-Est8;Amnionless;Arpc2;aru;ast;Atg17;Bacc;bmm;bru2;bur;bves;CAHbeta;CG10051;CG10479;CG10512;CG10911;CG10960;CG11151;CG11241;CG11317;CG11357;CG11594;CG11737;CG11912;CG12065;CG13102;CG13255;CG13325;CG13397;CG13585;CG13618;CG13654;CG13887;CG14245;CG14499;CG14502;CG14629;CG14688;CG14945;CG15093;CG15126;CG15152;CG15423;CG1544;CG15553;CG15579;CG16727;CG1673;CG1…
hocomoco__GATA1_MOUSE.H10MO.A	5.81	0.018	grn (inferredBy_Orthology).	CycT; HLH3B; Sirt6; pnr (inferredBy_MotifSimilarity_n_Orthology).	281	4987	AcCoAS;Adh;Adhr;Aldh;alph;alpha-Est5;alpha-Est8;Amnionless;AnxB9;Arpc2;aru;Atg17;Atg3;atk;Best2;BicD;bmm;bru2;bves;CAHbeta;cert;cg;CG10337;CG10479;CG10512;CG10527;CG10960;CG11151;CG11241;CG11317;CG11594;CG11737;CG11912;CG12065;CG13102;CG13255;CG13325;CG13516;CG13654;CG14245;CG14499;CG14502;CG14629;CG14945;CG15093;CG15126;CG15152;CG15210;CG15423;CG1544;CG15553;CG16727;CG16775;CG16965;CG17549;CG175…
transfac_pro__M07959	5.78	0.0179	Hnf4 (directAnnotation).	svp (inferredBy_MotifSimilarity_n_Orthology).	53	774	Aldh;Arc42;CG11151;CG11317;CG13325;CG13516;CG15553;CG42458;CG5590;CG5707;CG5958;CG6726;CG6767;CG7457;CG7724;CG8036;colt;Cpr;CPT2;Cyp4d20;daw;DIP-theta;dob;Dot;Etf-QO;Fak;GstT4;Hug;Idh;ImpL2;Irp-1B;klu;Lpin;LpR1;Lrch;Lsd-2;msn;Mtpalpha;Oatp74D;Obp56d;p38a;Pak3;pdgy;pdm3;Pli;REPTOR;Sc2;SP2637;srp;tok;whd;wun;yip2
cisbp__M5528	5.72	0.0178	Hnf4 (inferredBy_Orthology).	Hr78; svp; usp (inferredBy_MotifSimilarity_n_Orthology).	217	4401	Abi;AcCoAS;Adh;Adhr;Aldh;alph;alpha-Est8;Arc42;AstC;Atet;bbc;Best2;BicD;bmm;bru2;bves;CG10126;CG10237;CG10479;CG10663;CG10960;CG11151;CG11317;CG11357;CG11737;CG11843;CG12065;CG13325;CG13516;CG13887;CG1441;CG15126;CG15423;CG15531;CG15553;CG15771;CG16727;CG17019;CG17292;CG17549;CG18609;CG1889;CG2604;CG2865;CG30010;CG31145;CG31267;CG31324;CG3149;CG31522;CG3164;CG31694;CG32054;CG32195;CG32549;CG32647…
cisbp__M6253	5.68	0.0177	grn (inferredBy_Orthology).	CycT; GATAd; GATAe; HLH3B; Sirt6; pnr; srp (inferredBy_MotifSimilarity_n_Orthology).	279	4876	AcCoAS;Adh;Adhr;Aldh;alph;alpha-Est5;alpha-Est8;Amnionless;AnxB9;Arpc2;aru;Atg17;atk;BicD;bmm;bru2;bur;bves;CAHbeta;cert;cg;CG10337;CG10479;CG10512;CG10527;CG10960;CG11151;CG11241;CG11317;CG11357;CG11594;CG11737;CG11899;CG11912;CG12065;CG13102;CG13255;CG13325;CG13516;CG13585;CG13618;CG13654;CG14196;CG14245;CG14499;CG14502;CG14629;CG14945;CG15093;CG15126;CG15152;CG15210;CG15423;CG1544;CG15553;CG16…
hocomoco__GATA2_MOUSE.H10MO.A	5.66	0.0176	grn (inferredBy_Orthology).	CycT; HLH3B; pnr (inferredBy_MotifSimilarity_n_Orthology).	277	4915	AcCoAS;Adh;Adhr;Aldh;alpha-Est5;alpha-Est8;Amnionless;AnxB9;Arpc2;aru;Atg17;atk;Best2;BicD;bmm;bru2;bves;CAHbeta;cert;cg;CG10337;CG10479;CG10512;CG10527;CG10960;CG11151;CG11241;CG11317;CG11594;CG11737;CG11899;CG11912;CG12065;CG13102;CG13255;CG13325;CG13516;CG13618;CG13654;CG14196;CG14245;CG14499;CG14502;CG14629;CG14945;CG15093;CG15126;CG15152;CG15423;CG1544;CG15553;CG16727;CG16775;CG16965;CG17549…
transfac_pro__M01498	5.61	0.0175	GATAd; GATAe; grn; pnr; srp (inferredBy_Orthology).		274	4992	Abi;AcCoAS;Adh;Adhr;Aldh;alph;alpha-Est5;alpha-Est8;Amnionless;AnxB9;Arpc2;aru;Atet;Atg3;atk;Bacc;bbc;bmm;bru2;bves;CAHbeta;cg;CG10051;CG10208;CG10337;CG10479;CG10512;CG10911;CG10960;CG11151;CG11241;CG11317;CG11357;CG11594;CG11737;CG11899;CG11912;CG12065;CG12811;CG13102;CG13255;CG13325;CG13397;CG13585;CG13654;CG13887;CG14196;CG14245;CG14499;CG14502;CG14629;CG14688;CG14945;CG15093;CG15423;CG1544;C…
transfac_public__M00487	5.57	0.0174	TFAM (directAnnotation).		215	3892	Abi;AcCoAS;Aldh;alph;alpha-Est8;Amnionless;Arpc2;aru;Atg17;Bacc;bmm;bru2;cg;CG10051;CG10479;CG10512;CG10960;CG11149;CG11151;CG11317;CG11594;CG11737;CG11899;CG12065;CG12163;CG13255;CG13325;CG13618;CG13654;CG14499;CG14502;CG14688;CG15093;CG15423;CG1544;CG16727;CG1673;CG16965;CG17549;CG17574;CG17660;CG18249;CG18473;CG1941;CG2187;CG30371;CG31075;CG31145;CG31267;CG31522;CG3164;CG31694;CG32054;CG32549;…
transfac_pro__M04713	5.54	0.0173	grn (inferredBy_Orthology).	CycT; HLH3B; pnr (inferredBy_MotifSimilarity_n_Orthology).	296	4965	Abi;AcCoAS;Ada;Adh;Adhr;Akt1;Aldh;alpha-Est5;alpha-Est8;Amnionless;AnxB9;Arpc2;aru;Atet;Atg17;atk;Bacc;Best2;BicD;bmm;bru2;bves;CAHbeta;Cdc42;cert;cg;CG10051;CG10337;CG10479;CG10512;CG10527;CG10960;CG10962;CG11151;CG11241;CG11317;CG11594;CG11737;CG11899;CG11912;CG12057;CG12065;CG12811;CG13102;CG13255;CG13325;CG13397;CG13654;CG14196;CG14245;CG14499;CG14502;CG14629;CG14688;CG14945;CG15093;CG15126;C…
cisbp__M4622	5.43	0.0171	grn (inferredBy_Orthology).	CycT; GATAd; GATAe; HLH3B; pnr; srp (inferredBy_MotifSimilarity_n_Orthology).	278	4990	AcCoAS;Adh;Adhr;Aldh;alph;alpha-Est5;alpha-Est8;Amnionless;AnxB9;Arpc2;aru;Atg17;atk;Best2;BicD;bmm;bru2;bves;CAHbeta;cert;cg;CG10337;CG10479;CG10512;CG10527;CG10960;CG11151;CG11241;CG11317;CG11357;CG11594;CG11737;CG11899;CG11912;CG12065;CG13102;CG13255;CG13325;CG13516;CG13618;CG13654;CG14245;CG14499;CG14502;CG14629;CG14945;CG15093;CG15126;CG15152;CG1544;CG15553;CG16727;CG16775;CG16965;CG17549;CG…
hocomoco__GATA1_HUMAN.H10MO.S	5.4	0.017	grn (inferredBy_Orthology).	CycT; GATAd; GATAe; HLH3B; Sirt6; pnr; srp (inferredBy_MotifSimilarity_n_Orthology).	279	4950	Abi;AcCoAS;Adh;Adhr;Aldh;alph;alpha-Est5;alpha-Est8;Amnionless;AnxB9;Arpc2;aru;Atg17;atk;Best2;bmm;bru2;bves;CAHbeta;cert;cg;CG10337;CG10479;CG10512;CG10527;CG10960;CG11151;CG11241;CG11317;CG11357;CG11594;CG11737;CG11912;CG12065;CG13102;CG13255;CG13325;CG13516;CG13585;CG13618;CG13654;CG14196;CG14245;CG14499;CG14502;CG14629;CG14945;CG15093;CG15126;CG15152;CG15210;CG1544;CG15553;CG16727;CG16775;CG1…
hocomoco__HNF4A_HUMAN.H10MO.A	5.23	0.0166	Hnf4 (inferredBy_Orthology).	svp (inferredBy_MotifSimilarity_n_Orthology).	138	2599	Abi;AcCoAS;Adh;Adhr;Aldh;alph;alpha-Est8;Arc42;AstC;Atet;bru2;CG10126;CG10237;CG11151;CG11317;CG11357;CG13325;CG13516;CG14502;CG15126;CG15553;CG17597;CG30010;CG31145;CG31267;CG31522;CG3164;CG31694;CG32195;CG32795;CG33110;CG3663;CG40485;CG42456;CG42458;CG4267;CG43222;CG43658;CG44837;CG5590;CG5958;CG5966;CG6287;CG6685;CG6726;CG7457;CG7724;CG8036;CG8814;CG9815;Chd64;cic;CngA;colt;cpb;Cpr;Cpr67Fb;CPT…
homer__NCCTTATCTC_Gata2	5.19	0.0165	grn (inferredBy_Orthology).	CycT; HLH3B; pnr (inferredBy_MotifSimilarity_n_Orthology).	276	4696	Abi;AcCoAS;Adh;Adhr;Aldh;alpha-Est5;alpha-Est8;Amnionless;AnxB9;Arpc2;aru;Atg17;Best2;BicD;bmm;bru2;bur;bves;CAHbeta;cert;cg;CG10051;CG10337;CG10479;CG10512;CG10527;CG10960;CG11151;CG11241;CG11317;CG11594;CG11737;CG11912;CG12065;CG12811;CG13102;CG13255;CG13325;CG13585;CG13618;CG13654;CG14196;CG14245;CG14499;CG14502;CG14629;CG14688;CG14945;CG15093;CG15126;CG15152;CG15423;CG1544;CG15553;CG15579;CG1…
transfac_pro__M07961	5.17	0.0165	Hnf4 (directAnnotation).		112	2000	Adh;Adhr;Aldh;alph;alpha-Est8;Arc42;Bacc;bmm;bves;CG10479;CG10960;CG11151;CG11317;CG11357;CG12065;CG13516;CG15553;CG17019;CG17597;CG30010;CG31145;CG31267;CG31324;CG3164;CG31694;CG32195;CG32647;CG32795;CG33110;CG42458;CG4267;CG43658;CG44837;CG5590;CG5958;CG5966;CG6175;CG6432;CG6726;CG7457;CG7724;CG8036;CG8679;CG8814;CG9815;cic;colt;Cpr;Cpr67Fb;CPT2;crp;Cyp4d20;daw;Dbi;Dot;dsx;emp;Etf-QO;Fak;Fem-1;…
transfac_pro__M02757	5.16	0.0165	pnr (inferredBy_Orthology).	grn (inferredBy_MotifSimilarity_n_Orthology).	261	4208	Abi;AcCoAS;Acph-1;Adh;Adhr;agt;Aldh;alph;alpha-Est5;alpha-Est8;Amnionless;AnxB9;Arpc2;aru;Atet;Atg17;atk;Bacc;bmm;bru2;CAHbeta;cert;cg;CG10051;CG10208;CG10337;CG10479;CG10527;CG10911;CG10960;CG11149;CG11151;CG11241;CG11357;CG11737;CG11912;CG12065;CG13102;CG13255;CG13325;CG13397;CG13654;CG13887;CG14196;CG14245;CG14499;CG14502;CG14629;CG14688;CG14945;CG15093;CG15126;CG15423;CG1544;CG15579;CG16727;C…
jaspar__MA0309.1	5.12	0.0163	GATAd; GATAe; grn; pnr; srp (inferredBy_Orthology).		293	4993	Abi;AcCoAS;Acph-1;Akt1;Aldh;alph;alpha-Est5;alpha-Est8;Amnionless;Arc1;Arpc2;aru;ast;Atg17;atk;Bacc;Best2;BicD;bmm;bru2;bur;bves;cg;CG10051;CG10337;CG10479;CG10512;CG10527;CG10911;CG10960;CG11149;CG11151;CG11241;CG11317;CG11357;CG11399;CG11594;CG11737;CG11912;CG12065;CG13102;CG13255;CG13325;CG13397;CG13618;CG13654;CG13887;CG14196;CG14245;CG14499;CG14502;CG1468;CG14945;CG15093;CG15126;CG15210;CG15…
homer__NBWGATAAGR_Gata4	5.12	0.0163	pnr (inferredBy_Orthology).	GATAe; grn; srp (inferredBy_MotifSimilarity).CycT; GATAd; HLH3B (inferredBy_MotifSimilarity_n_Orthology).	293	4955	Abi;AcCoAS;Adh;Adhr;Aldh;alph;alpha-Est5;alpha-Est8;Amnionless;AnxB9;Arpc2;aru;ast;Atet;Atg17;atk;Bacc;bmm;bru2;bur;CAHbeta;cert;cg;CG10051;CG10337;CG10479;CG10512;CG10527;CG10911;CG10960;CG11149;CG11151;CG11241;CG11317;CG11594;CG11737;CG11912;CG12065;CG13102;CG13255;CG13325;CG13654;CG14245;CG14499;CG14502;CG14629;CG14688;CG14945;CG15093;CG15126;CG15152;CG15423;CG1544;CG15553;CG16727;CG1673;CG167…
swissregulon__hs__GATA6.p2	5.11	0.0163	pnr (inferredBy_Orthology).	HLH3B; grn (inferredBy_MotifSimilarity_n_Orthology).	269	4699	Abi;AcCoAS;Adh;Adhr;Aldh;alph;alpha-Est5;alpha-Est8;Amnionless;AnxB9;Arpc2;aru;Atg17;atk;Bacc;bmm;bru2;bur;bves;CAHbeta;cg;CG10051;CG10337;CG10479;CG10512;CG10527;CG10960;CG11149;CG11151;CG11241;CG11317;CG11594;CG11737;CG11899;CG11912;CG12065;CG13102;CG13255;CG13325;CG13516;CG13618;CG13654;CG14245;CG14435;CG14499;CG14502;CG14629;CG14688;CG14945;CG15093;CG15126;CG15210;CG15423;CG1544;CG15553;CG167…
factorbook__GATA1	5.1	0.0163	grn (inferredBy_Orthology).	CycT; GATAd; GATAe; HLH3B; Sirt6; pnr; srp (inferredBy_MotifSimilarity_n_Orthology).	270	4970	AcCoAS;Adh;Adhr;Aldh;alph;alpha-Est5;alpha-Est8;Amnionless;AnxB9;Arpc2;aru;Atg17;atk;Best2;BicD;bmm;bru2;bves;CAHbeta;cert;cg;CG10337;CG10479;CG10512;CG10527;CG10960;CG11151;CG11241;CG11317;CG11357;CG11594;CG11737;CG11899;CG11912;CG12065;CG13102;CG13255;CG13325;CG13516;CG13618;CG13654;CG14245;CG14499;CG14502;CG14629;CG14945;CG15093;CG15126;CG15152;CG1544;CG15553;CG16727;CG16775;CG16965;CG17549;CG…
transfac_pro__M01902	5.08	0.0162	GATAd; GATAe; grn; pnr; srp (inferredBy_Orthology).		292	4997	Abi;AcCoAS;Acph-1;Akt1;Aldh;alph;alpha-Est5;alpha-Est8;Amnionless;Arc1;Arpc2;aru;ast;Atg17;atk;Bacc;Best2;BicD;bmm;bru2;bur;bves;cg;CG10051;CG10337;CG10479;CG10512;CG10527;CG10911;CG10960;CG11149;CG11151;CG11241;CG11317;CG11357;CG11399;CG11594;CG11737;CG11912;CG12065;CG13102;CG13255;CG13325;CG13397;CG13618;CG13654;CG13887;CG14196;CG14245;CG14499;CG14502;CG1468;CG14945;CG15093;CG15126;CG15210;CG15…
cisbp__M4601	5.07	0.0162	grn (inferredBy_Orthology).	CycT; HLH3B; pnr (inferredBy_MotifSimilarity_n_Orthology).	265	4714	Abi;AcCoAS;Ada;Akt1;Aldh;alph;alpha-Est5;alpha-Est8;Amnionless;AnxB9;ArgRS;Arpc2;Atg17;Atg3;atk;Bacc;Best2;BicD;bmm;bru2;bves;CAHbeta;Cdc42;cert;CG10126;CG10337;CG10479;CG10512;CG10527;CG10960;CG11151;CG11241;CG11317;CG11357;CG11399;CG11594;CG11737;CG11912;CG12057;CG12065;CG13102;CG13325;CG13516;CG13654;CG14245;CG14499;CG14502;CG14629;CG14688;CG14945;CG15093;CG15126;CG15152;CG15210;CG1544;CG16727…
transfac_pro__M07732	5.02	0.0161	pnr (directAnnotation).	GATAd; GATAe; grn; srp (inferredBy_MotifSimilarity_n_Orthology).	290	4800	Abi;AcCoAS;Adh;Adhr;Aldh;alph;alpha-Est5;alpha-Est8;Amnionless;AnxB9;Arpc2;aru;ast;Atg17;atk;Bacc;BicD;bmm;bru2;bur;bves;cert;cg;CG10051;CG10337;CG10479;CG10512;CG10527;CG10911;CG10960;CG10962;CG11151;CG11241;CG11317;CG11737;CG11899;CG11912;CG12065;CG13102;CG13255;CG13325;CG13397;CG13516;CG13618;CG13654;CG13887;CG14245;CG14499;CG14502;CG14629;CG1468;CG14688;CG14945;CG15093;CG15126;CG15152;CG15423…
elemento__CTTATCA	5.01	0.0161			190	3044	Abi;AcCoAS;Akt1;Aldh;alph;alpha-Est8;Amnionless;aru;Atet;Atg17;Bacc;BicD;bmm;bru2;CAHbeta;CG10341;CG10512;CG10527;CG10960;CG11241;CG11317;CG11594;CG11737;CG12065;CG12811;CG13102;CG13255;CG13325;CG13618;CG13654;CG14245;CG14435;CG14499;CG1468;CG14945;CG15093;CG15126;CG15210;CG1544;CG15579;CG16727;CG16775;CG16965;CG17549;CG17574;CG17660;CG18473;CG30010;CG30371;CG31145;CG31156;CG31267;CG31522;CG31694…
cisbp__M2575	5	0.0161	TFAM (directAnnotation).		185	3198	Abi;AcCoAS;Aldh;alph;alpha-Est8;Amnionless;Arpc2;aru;Atg17;Bacc;bmm;bru2;cg;CG10051;CG10479;CG10512;CG10960;CG11149;CG11151;CG11317;CG11899;CG11912;CG12065;CG12163;CG13255;CG13325;CG13397;CG13618;CG13654;CG14499;CG14502;CG14688;CG15093;CG15423;CG1544;CG1673;CG16965;CG17549;CG17660;CG18249;CG18473;CG1941;CG30371;CG31075;CG31145;CG31267;CG31522;CG3164;CG31694;CG32054;CG32549;CG33128;CG33510;CG3534;…
cisbp__M4660	4.96	0.016	grn (inferredBy_Orthology).	HLH3B; pnr (inferredBy_MotifSimilarity_n_Orthology).	272	4995	AcCoAS;Adh;Adhr;Akt1;Aldh;alph;alpha-Est5;alpha-Est8;Amnionless;AnxB9;Arpc2;aru;Atet;Atg17;atk;Best2;BicD;bru2;bves;cert;cg;CG10337;CG10479;CG10512;CG10527;CG10960;CG10962;CG11151;CG11241;CG11317;CG11594;CG11737;CG11912;CG12057;CG12065;CG13102;CG13255;CG13325;CG13516;CG13585;CG13654;CG14196;CG14245;CG14499;CG14629;CG15093;CG15126;CG15152;CG15210;CG15423;CG1544;CG15553;CG16727;CG16775;CG16965;CG17…
transfac_pro__M07728	4.93	0.0159	grn (directAnnotation).	srp (inferredBy_MotifSimilarity).GATAd; GATAe; pnr (inferredBy_MotifSimilarity_n_Orthology).	300	4983	Abi;AcCoAS;Acph-1;Adh;Adhr;Akt1;Aldh;alph;alpha-Est5;alpha-Est8;Amnionless;AnxB9;ArgRS;Arpc2;Atet;Atg17;atk;Bacc;bmm;bru2;bur;CAHbeta;cg;CG10051;CG10337;CG10479;CG10512;CG10527;CG10911;CG10960;CG11151;CG11241;CG11317;CG11357;CG11594;CG11737;CG11912;CG12065;CG13102;CG13255;CG13325;CG13397;CG13618;CG13654;CG14196;CG14245;CG14499;CG14502;CG14629;CG1468;CG14688;CG14945;CG15093;CG15126;CG15423;CG1544;…
cisbp__M5524	4.91	0.0158	Hnf4 (inferredBy_Orthology).		133	2438	Abi;AcCoAS;Adh;Adhr;Aldh;alph;alpha-Est8;Arc42;AstC;Atet;atk;bmm;bru2;bves;cg;CG10663;CG11151;CG11317;CG11357;CG13325;CG13516;CG13618;CG14502;CG15126;CG15553;CG15771;CG17019;CG17549;CG17597;CG30010;CG31145;CG31267;CG31522;CG3164;CG31694;CG32195;CG32795;CG34284;CG4038;CG42458;CG4267;CG43658;CG5590;CG5707;CG5958;CG5966;CG6175;CG6287;CG6685;CG6726;CG6767;CG7457;CG7724;CG8036;CG8679;CG8814;CG9498;CG9…
transfac_pro__M04693	4.89	0.0158	kay (inferredBy_Orthology).	Jra (inferredBy_MotifSimilarity).NFAT; cnc (inferredBy_MotifSimilarity_n_Orthology).	180	3062	agt;Aldh;ALiX;alph;alpha-Est8;AnxB9;Arpc2;Bacc;bbc;Best2;bru2;bves;cert;CG10103;CG10126;CG10337;CG10512;CG10527;CG10911;CG11168;CG12012;CG12065;CG12163;CG12730;CG13085;CG13654;CG13887;CG14245;CG14688;CG15152;CG15423;CG1544;CG16727;CG17019;CG17292;CG17574;CG30423;CG31145;CG31156;CG31267;CG31324;CG3149;CG31522;CG3164;CG31694;CG32054;CG33054;CG33110;CG34284;CG3630;CG3663;CG4025;CG4038;CG42239;CG4245…
taipale__Hnf4a_DBD_RRGGTCAAAGTCCRNN	4.89	0.0158	Hnf4 (inferredBy_Orthology).	Hr78; svp; usp (inferredBy_MotifSimilarity_n_Orthology).	137	2399	Abi;AcCoAS;Aldh;alpha-Est8;Arc42;AstC;Atet;bbc;bru2;bves;CG10237;CG10479;CG10663;CG10960;CG11151;CG11317;CG11357;CG12065;CG13325;CG13516;CG1441;CG15553;CG15771;CG17019;CG30010;CG31145;CG31267;CG3164;CG31694;CG32054;CG32647;CG32795;CG33110;CG34112;CG34284;CG3829;CG4038;CG40485;CG42458;CG42542;CG4267;CG43658;CG44837;CG5590;CG5849;CG5958;CG5966;CG6028;CG6175;CG6726;CG7457;CG7724;CG8036;CG8468;CG8814…
factorbook__HNF4	4.86	0.0157	Hnf4 (inferredBy_Orthology).	svp (inferredBy_MotifSimilarity_n_Orthology).	92	1521	Adh;Adhr;Aldh;alpha-Est8;Arc42;Atet;bru2;CG10126;CG10237;CG11151;CG11317;CG11357;CG14502;CG15553;CG31145;CG31267;CG31522;CG3164;CG31694;CG32195;CG32795;CG33110;CG42458;CG43222;CG43658;CG5590;CG5958;CG6726;CG7457;CG7724;CG8036;CG8814;CG9815;cic;CngA;colt;Cpr;CPT2;crp;Cyp4d20;Dad;dar1;daw;Dbi;dob;Dot;Ect3;emp;Etf-QO;Fem-1;fus;Gk1;GstT4;Hr39;Hug;Idh;ImpL2;Indy;Irp-1B;klu;Lpin;LpR1;Lrch;Lsd-2;mino;mo…
cisbp__M4698	4.86	0.0157	Hnf4 (inferredBy_Orthology).	Hr78; svp (inferredBy_MotifSimilarity_n_Orthology).	84	1290	AcCoAS;Adh;Adhr;Aldh;Arc42;Atet;bru2;CG10126;CG11151;CG11317;CG11357;CG13516;CG15553;CG31145;CG31522;CG3164;CG31694;CG32195;CG32795;CG33110;CG42458;CG43222;CG43658;CG5590;CG6726;CG7457;CG7724;CG8036;CG8814;cic;cindr;CngA;Cpr;Cpr67Fb;CPT2;crp;Cyp4d20;Dad;daw;DIP-theta;Dot;Dr;Ect3;emp;Etf-QO;Fem-1;fus;Gk1;Gk2;Hug;Idh;ImpL2;Indy;Irp-1B;klu;l(1)G0193;Lerp;Lpin;LpR1;Lsd-2;moody;msn;Mtpalpha;Obp56d;p38…
transfac_pro__M04719	4.85	0.0157	Hnf4 (inferredBy_Orthology).	svp; usp (inferredBy_MotifSimilarity_n_Orthology).	157	3265	Abi;AcCoAS;Adh;Adhr;Aldh;alph;alpha-Est8;Amnionless;Arc42;AstC;Atet;atk;Best2;bru2;CG10126;CG10237;CG11151;CG11317;CG11357;CG12065;CG13325;CG13516;CG15093;CG15126;CG15553;CG1673;CG17597;CG2865;CG30010;CG31145;CG31267;CG31324;CG31522;CG3164;CG31694;CG32054;CG32195;CG32795;CG33110;CG3663;CG3829;CG40485;CG42458;CG43222;CG43658;CG44837;CG5590;CG5945;CG5958;CG5966;CG5999;CG6175;CG6287;CG6330;CG6726;CG…
bergman__srp	4.85	0.0157	srp (directAnnotation).	GATAd; GATAe; grn; pnr (inferredBy_MotifSimilarity_n_Orthology).	256	4437	Abi;AcCoAS;Aldh;alph;alpha-Est5;alpha-Est8;Amnionless;AnxB9;Arpc2;ast;Atg17;atk;Bacc;bru2;bur;cg;CG10051;CG10337;CG10479;CG10527;CG10911;CG10960;CG10962;CG11151;CG11317;CG11357;CG11737;CG11912;CG12057;CG12065;CG12811;CG13102;CG13255;CG13325;CG13397;CG13618;CG13654;CG13887;CG14245;CG14499;CG14502;CG1468;CG14688;CG14945;CG15093;CG15126;CG15152;CG15423;CG1544;CG1673;CG16775;CG16965;CG17549;CG17574;C…
transfac_pro__M07215	4.84	0.0157	Hnf4 (inferredBy_Orthology).	usp (inferredBy_MotifSimilarity).Hr78; svp (inferredBy_MotifSimilarity_n_Orthology).	128	2366	AcCoAS;Adh;Adhr;Aldh;alpha-Est8;Amnionless;Arc42;AstC;Atet;atk;bru2;CG10126;CG10237;CG11151;CG11317;CG11357;CG13325;CG13516;CG15126;CG15553;CG1673;CG17597;CG31145;CG31267;CG31324;CG31522;CG3164;CG31694;CG32054;CG32195;CG32795;CG33110;CG3588;CG3663;CG3829;CG40485;CG42458;CG4267;CG43222;CG43658;CG44837;CG5590;CG5958;CG6726;CG7457;CG7724;CG8036;CG8814;CG9815;Chd64;cindr;CngA;colt;Cpr;CPT2;crp;Cyp4d2…
cisbp__M5526	4.83	0.0157	Hnf4 (inferredBy_Orthology).		202	4073	Abi;AcCoAS;Adh;Adhr;Aldh;alph;alpha-Est8;Arc42;AstC;Atet;bmm;bru2;bves;cg;CG10051;CG10126;CG10237;CG10479;CG10663;CG10960;CG11151;CG11317;CG11357;CG11737;CG12065;CG13325;CG13516;CG13618;CG1441;CG14629;CG15126;CG15423;CG15531;CG15553;CG17019;CG17292;CG17549;CG17597;CG18609;CG1889;CG2604;CG2865;CG30010;CG31145;CG31267;CG31324;CG31522;CG3164;CG31694;CG32195;CG32795;CG33110;CG3588;CG3663;CG3829;CG422…
cisbp__M4690	4.82	0.0157	grn (inferredBy_Orthology).	CycT; HLH3B; pnr (inferredBy_MotifSimilarity_n_Orthology).	270	4998	Abi;AcCoAS;Ada;Akt1;Aldh;alph;alpha-Est8;Amnionless;AnxB9;ArgRS;Arpc2;ast;Atg17;Atg3;atk;Bacc;Best2;BicD;bmm;bru2;bves;CAHbeta;Cdc42;cert;cg;CG10337;CG10479;CG10527;CG10960;CG11151;CG11317;CG11399;CG11594;CG11737;CG11899;CG11912;CG12057;CG12065;CG13102;CG13255;CG13325;CG13516;CG13618;CG14196;CG14245;CG14499;CG14502;CG14629;CG14688;CG14945;CG15093;CG15126;CG15152;CG15210;CG15423;CG1544;CG16727;CG1…
scertf__badis.GZF3	4.76	0.0155	GATAd; GATAe; grn; pnr; srp (inferredBy_Orthology).		263	4332	Abi;AcCoAS;Acph-1;Akt1;Aldh;alph;alpha-Est5;alpha-Est8;Amnionless;Arpc2;Atg17;atk;Bacc;Best2;BicD;bmm;bru2;bur;bves;cg;CG10051;CG10337;CG10479;CG10911;CG10960;CG11151;CG11241;CG11317;CG11399;CG11594;CG11737;CG11912;CG12065;CG13102;CG13255;CG13325;CG13397;CG13618;CG13654;CG14245;CG14499;CG14502;CG1468;CG14688;CG14945;CG15093;CG15126;CG15210;CG15423;CG1544;CG15579;CG1673;CG16775;CG16965;CG17019;CG1…
cisbp__M6025	4.72	0.0154	Hnf4 (inferredBy_Orthology).	Hr78; svp; usp (inferredBy_MotifSimilarity_n_Orthology).	216	4501	Abi;AcCoAS;Adh;Adhr;Aldh;alph;alpha-Est8;Arc42;AstC;Atet;bbc;Best2;BicD;bmm;bru2;bves;CG10126;CG10237;CG10479;CG10663;CG10960;CG11151;CG11317;CG11357;CG11737;CG11843;CG12065;CG13325;CG13516;CG13887;CG1441;CG15423;CG15553;CG15771;CG16727;CG17019;CG17292;CG17549;CG17597;CG18609;CG2604;CG2865;CG30010;CG31075;CG31145;CG31267;CG31324;CG3149;CG31522;CG3164;CG31694;CG32054;CG32195;CG32549;CG32647;CG3279…
transfac_pro__M07960	4.68	0.0153	Hnf4 (directAnnotation).	svp (inferredBy_MotifSimilarity_n_Orthology).	51	815	Aldh;alpha-Est8;CG10126;CG11151;CG11317;CG13516;CG13618;CG15553;CG31145;CG3164;CG31694;CG33110;CG42240;CG42458;CG43222;CG5590;CG7457;CG8036;CG8814;cindr;Cpr;Cpr67Fb;Cyp4d20;daw;Dbi;emp;Etf-QO;Fak;Hug;ImpL2;klu;knrl;LpR1;Lrch;moody;msn;Mtpalpha;Obp56d;p38a;Pak3;pdgy;Pli;Pmp70;REPTOR;RpL22;SNF4Agamma;spin;Tl;ttv;whd;yip2
predrem__nrMotif2061	4.65	0.0153			105	1901	5PtaseI;AcCoAS;Ada;Akt1;aru;Atet;Atg3;Bacc;bru2;bves;CAHbeta;cg;CG10960;CG13397;CG14196;CG14435;CG15083;CG15093;CG15126;CG1544;CG1572;CG17660;CG1910;CG2865;CG31145;CG31522;CG31694;CG33110;CG33258;CG3702;CG42240;CG4297;CG43658;CG5953;CG6287;CG6685;CG6951;CG7724;CG8036;CG9084;CG9837;CG9921;cib;cic;cindr;cpa;cpb;Cpr67Fb;crp;Cyp1;Cyp12b2;Dad;dar1;Dsp1;dsx;egr;emp;Etf-QO;Faa;Fim;Fuca;fus;glec;gw;hfp;H…
transfac_pro__M01910	4.64	0.0152	GATAd; GATAe; grn; pnr; srp (inferredBy_Orthology).		292	4899	Abi;AcCoAS;agt;Aldh;alph;alpha-Est5;alpha-Est8;Amnionless;AnxB9;Arpc2;aru;Atet;Atg17;atk;Bacc;BicD;bmm;bru2;bur;CAHbeta;cg;CG10051;CG10337;CG10479;CG10512;CG10527;CG10911;CG10960;CG11151;CG11241;CG11317;CG11357;CG11594;CG11737;CG11899;CG11912;CG12057;CG12065;CG12163;CG13102;CG13255;CG13325;CG13397;CG13618;CG13654;CG13887;CG14196;CG14245;CG14499;CG14502;CG14629;CG1468;CG14688;CG14945;CG15093;CG151…
taipale_tf_pairs__FOXA1_TRNGTAAACA_HT	4.64	0.0152	fkh (inferredBy_Orthology).		22	258	Akt1;cg;CG2865;CG31145;CG5953;CG9837;CG9921;Cyp1;Cyp6v1;Dr;Dsp1;Etf-QO;klu;LpR1;Lrch;mbc;MEP-1;olf186-M;Pp1alpha-96A;SNF4Agamma;Taldo;tok
cisbp__M1936	4.63	0.0152	Hnf4 (inferredBy_Orthology).	usp (inferredBy_MotifSimilarity).EcR; Hr51; Hr78; svp (inferredBy_MotifSimilarity_n_Orthology).	108	1838	AcCoAS;Adh;Adhr;Aldh;alpha-Est8;Arc42;AstC;Atet;atk;bru2;CG10237;CG11151;CG11317;CG11357;CG15553;CG17597;CG31145;CG31267;CG31522;CG3164;CG31694;CG32054;CG32195;CG32795;CG33110;CG3588;CG3663;CG40485;CG42458;CG4267;CG43222;CG43658;CG44837;CG5590;CG6726;CG7457;CG7724;CG8036;CG8814;CG9815;Chd64;CngA;colt;Cpr;Cpr67Fb;CPT2;crp;Cyp4d20;Dad;daw;DIP-theta;dob;Dot;Dr;Ect3;emp;Etf-QO;Fem-1;fus;Gk1;Gk2;GstT4…
taipale__HNF4A_full_NRGTCCAAAGTCCANY	4.61	0.0152	Hnf4 (inferredBy_Orthology).		202	3853	Abi;AcCoAS;Adh;Adhr;Aldh;alph;alpha-Est8;Arc42;Atet;bmm;bru2;bves;cert;cg;CG10051;CG10126;CG10237;CG10479;CG10663;CG10960;CG11151;CG11317;CG11357;CG11737;CG11843;CG12065;CG13325;CG13516;CG13618;CG1441;CG15126;CG15423;CG15553;CG17019;CG17292;CG17549;CG17597;CG18609;CG1889;CG2604;CG2865;CG30010;CG31145;CG31267;CG31324;CG31522;CG3164;CG31694;CG32195;CG32795;CG33110;CG34284;CG3663;CG3829;CG4038;CG424…
jaspar__MA0300.1	4.59	0.0151	GATAd; GATAe; grn; pnr; srp (inferredBy_Orthology).		290	4885	Abi;AcCoAS;agt;Aldh;alph;alpha-Est5;alpha-Est8;Amnionless;AnxB9;Arpc2;aru;Atet;Atg17;atk;Bacc;BicD;bmm;bru2;bur;CAHbeta;cg;CG10051;CG10337;CG10479;CG10512;CG10527;CG10911;CG10960;CG11151;CG11241;CG11317;CG11357;CG11594;CG11737;CG11899;CG11912;CG12057;CG12065;CG12163;CG13102;CG13255;CG13325;CG13397;CG13618;CG13654;CG13887;CG14196;CG14245;CG14499;CG14502;CG14629;CG1468;CG14688;CG14945;CG15093;CG151…
hocomoco__HNF4G_HUMAN.H10MO.C	4.59	0.0151	Hnf4 (inferredBy_Orthology).	usp (inferredBy_MotifSimilarity).EcR; Hr51; Hr78; svp (inferredBy_MotifSimilarity_n_Orthology).	126	2387	AcCoAS;Adh;Adhr;Aldh;alph;alpha-Est8;Amnionless;Arc42;AstC;Atet;bru2;CG10126;CG10237;CG11151;CG11317;CG11357;CG13325;CG13516;CG15126;CG15553;CG17597;CG31145;CG31267;CG31522;CG3164;CG31694;CG32054;CG32195;CG32647;CG32795;CG33110;CG3663;CG42240;CG42458;CG43222;CG43658;CG44837;CG5590;CG5958;CG6287;CG6726;CG7457;CG7724;CG8036;CG8814;CG9815;Chd64;cindr;CngA;colt;cpb;Cpr;Cpr67Fb;CPT2;crp;Cyp4d20;dar1;d…
cisbp__M5525	4.53	0.015	Hnf4 (inferredBy_Orthology).	Hr78; svp; usp (inferredBy_MotifSimilarity_n_Orthology).	228	4770	Abi;AcCoAS;Adh;Adhr;Aldh;alph;Amnionless;Arc42;Arpc2;Art1;ast;AstC;Atet;bbc;Best2;bru2;bves;CAHbeta;CG10126;CG10237;CG10479;CG10663;CG10911;CG10960;CG11151;CG11317;CG11357;CG11737;CG11843;CG12065;CG12163;CG13102;CG13325;CG13516;CG14196;CG1441;CG1468;CG15093;CG15423;CG15553;CG15771;CG1673;CG16965;CG17019;CG17292;CG17549;CG18473;CG2187;CG30010;CG30151;CG30357;CG31145;CG31267;CG31324;CG31522;CG3164;…
cisbp__M0801	4.51	0.0149	GATAd; GATAe; grn; pnr; srp (inferredBy_Orthology).		286	4811	Abi;AcCoAS;Adh;Adhr;Aldh;alph;alpha-Est5;alpha-Est8;Amnionless;AnxB9;Arpc2;Atg17;atk;Bacc;BicD;bmm;bru2;bur;cg;CG10051;CG10337;CG10479;CG10512;CG10527;CG10911;CG10960;CG11151;CG11241;CG11317;CG11357;CG11594;CG11737;CG11912;CG12057;CG12065;CG13102;CG13255;CG13325;CG13397;CG13618;CG13654;CG13887;CG14196;CG14245;CG14439;CG14499;CG14502;CG14629;CG1468;CG14688;CG14945;CG15093;CG15126;CG15210;CG15423;C…
swissregulon__sacCer__GAT1	4.5	0.0149	GATAd; GATAe; grn; pnr; srp (inferredBy_Orthology).		285	4829	Abi;AcCoAS;Aldh;alph;alpha-Est5;alpha-Est8;Amnionless;AnxB9;Arpc2;aru;Atg17;atk;Bacc;BicD;bmm;bru2;bur;cg;CG10051;CG10337;CG10479;CG10512;CG10527;CG10911;CG10960;CG11149;CG11151;CG11241;CG11317;CG11357;CG11594;CG11737;CG11912;CG12057;CG12065;CG13102;CG13255;CG13325;CG13397;CG13654;CG13887;CG14196;CG14245;CG14499;CG14502;CG14629;CG1468;CG14688;CG14945;CG15093;CG15126;CG15423;CG1544;CG15553;CG15579…
homer__CAGAGGNCAAAGTCCA_HNF4a	4.49	0.0149	Hnf4 (inferredBy_Orthology).	usp (inferredBy_MotifSimilarity).EcR; Hr51; Hr78; svp (inferredBy_MotifSimilarity_n_Orthology).	102	1924	AcCoAS;Adh;Adhr;Aldh;alpha-Est8;Amnionless;Arc42;Atet;bru2;CG10237;CG11151;CG11317;CG11357;CG15553;CG1673;CG31145;CG31267;CG31324;CG31522;CG3164;CG32195;CG32795;CG33110;CG3663;CG40485;CG42458;CG4267;CG43222;CG43658;CG44837;CG5590;CG5958;CG6726;CG7457;CG7724;CG8036;CG9815;Chd64;CngA;colt;Cpr67Fb;CPT2;crp;Cyp4d20;dar1;daw;DIP-theta;dob;Dot;Ect3;Elal;emp;Etf-QO;Fem-1;Gk1;GstT4;Hr39;Hug;Idh;ImpL2;Ind…
hdpi__SMAD4	4.46	0.0148	Med (inferredBy_Orthology).		12	98	cg;CG10126;CG31522;CG44837;Cyp1;Dsp1;dsx;pdm3;rogdi;Tl;tok;ttv
elemento__CTTATCAG	4.45	0.0148			270	4961	Abi;AcCoAS;Adh;Adhr;Aldh;alph;alpha-Est8;Amnionless;AnxB9;Arpc2;aru;Atg17;Bacc;Best2;BicD;bmm;bru2;bves;CAHbeta;cert;CG10051;CG10208;CG10337;CG10479;CG10512;CG10911;CG10960;CG11241;CG11317;CG11357;CG11399;CG11594;CG11737;CG11899;CG11912;CG12065;CG13255;CG13318;CG13325;CG13585;CG13618;CG13654;CG14196;CG1441;CG14499;CG14502;CG14945;CG15093;CG15126;CG15423;CG1544;CG16727;CG16775;CG16965;CG17032;CG17…
transfac_pro__M01570	4.43	0.0147	GATAd; GATAe; grn; pnr; srp (inferredBy_Orthology).		271	4920	Abi;AcCoAS;Akt1;Aldh;alpha-Est5;alpha-Est8;Amnionless;Arpc2;aru;ast;Atet;Atg17;Bacc;bbc;bmm;bru2;CG10051;CG10337;CG10479;CG10512;CG10960;CG11149;CG11151;CG11317;CG11357;CG11594;CG11737;CG11899;CG11912;CG12057;CG12065;CG12811;CG13102;CG13255;CG13325;CG13397;CG13654;CG14196;CG14245;CG14435;CG14439;CG14502;CG14629;CG14688;CG14945;CG15093;CG15126;CG15152;CG15423;CG1544;CG15553;CG15579;CG16727;CG1673;…
taipale__HNF4A_DBD_NRGTCCAAAGTCCANY_repr	4.42	0.0147	Hnf4 (inferredBy_Orthology).		118	2053	AcCoAS;Adh;Adhr;Aldh;alpha-Est8;Atet;atk;bves;CG10663;CG11151;CG11317;CG11357;CG13325;CG13516;CG13618;CG14502;CG15553;CG15771;CG17019;CG17549;CG17597;CG31145;CG31267;CG31522;CG3164;CG31694;CG32195;CG32795;CG33110;CG34284;CG4038;CG42458;CG43658;CG5112;CG5590;CG5707;CG5958;CG5966;CG6175;CG6287;CG6685;CG6726;CG6767;CG7457;CG7724;CG7881;CG8036;CG8814;CG9498;CG9815;cic;cindr;CngA;colt;Cpr;CPT2;crp;Cyp…
cisbp__M4983	4.4	0.0147	GATAe (directAnnotation).	srp (inferredBy_MotifSimilarity).GATAd; grn; pnr (inferredBy_MotifSimilarity_n_Orthology).	279	4663	Abi;AcCoAS;Adh;Adhr;Aldh;alph;alpha-Est5;alpha-Est8;Amnionless;AnxB9;Arpc2;aru;Atet;Atg17;atk;Bacc;BicD;bmm;bru2;bur;bves;CAHbeta;cg;CG10051;CG10337;CG10479;CG10527;CG10911;CG10960;CG11151;CG11241;CG11317;CG11357;CG11594;CG11737;CG11912;CG12065;CG12811;CG13102;CG13255;CG13325;CG13397;CG13516;CG13618;CG13654;CG14196;CG14245;CG14499;CG14502;CG14629;CG1468;CG14945;CG15093;CG15126;CG15152;CG15210;CG1…
flyfactorsurvey__GATAe_SANGER_5_FBgn0038391	4.37	0.0146	GATAe (directAnnotation).	srp (inferredBy_MotifSimilarity).GATAd; grn; pnr (inferredBy_MotifSimilarity_n_Orthology).	285	4731	Abi;AcCoAS;Adh;Adhr;Aldh;alph;alpha-Est5;alpha-Est8;Amnionless;AnxB9;Arpc2;aru;Atet;Atg17;atk;Bacc;BicD;bmm;bru2;bur;bves;CAHbeta;cg;CG10051;CG10337;CG10479;CG10512;CG10527;CG10911;CG10960;CG11151;CG11241;CG11317;CG11594;CG11737;CG11912;CG12065;CG12811;CG13102;CG13255;CG13325;CG13516;CG13618;CG13654;CG13887;CG14196;CG14245;CG14435;CG14499;CG14502;CG14629;CG1468;CG14945;CG15093;CG15126;CG15152;CG1…
hocomoco__HNF4A_MOUSE.H10MO.A	4.37	0.0146	Hnf4 (inferredBy_Orthology).	usp (inferredBy_MotifSimilarity).EcR; Hr78; svp (inferredBy_MotifSimilarity_n_Orthology).	120	2223	Adh;Adhr;Aldh;alph;alpha-Est8;Arc42;Atet;atk;bru2;CG10126;CG10237;CG11151;CG11317;CG11357;CG13325;CG13516;CG15093;CG15553;CG17597;CG31145;CG31267;CG31324;CG31522;CG3164;CG31694;CG32195;CG32795;CG33110;CG3663;CG42458;CG43222;CG43658;CG44837;CG5590;CG5958;CG6330;CG6726;CG7457;CG7724;CG8036;CG8814;CG9664;CG9815;cic;cindr;CngA;cpb;CPT2;crp;Cyp4d20;dar1;daw;Dbi;DIP-theta;Dot;Dr;dsx;Ect3;egr;Elal;emp;E…
taipale__HNF4A_DBD_RRGGTCAAAGTCCRNN	4.35	0.0146	Hnf4 (inferredBy_Orthology).	Hr78; svp; usp (inferredBy_MotifSimilarity_n_Orthology).	226	4576	Abi;AcCoAS;Adh;Adhr;Aldh;alph;Amnionless;Arc42;Art1;AstC;Atet;Atg17;bbc;Best2;bru2;bves;CAHbeta;CG10237;CG10479;CG10663;CG10911;CG10960;CG11151;CG11317;CG11357;CG11737;CG11843;CG12065;CG12163;CG13102;CG13325;CG13516;CG14196;CG1441;CG1468;CG15093;CG15423;CG15553;CG15771;CG1673;CG16965;CG17019;CG17292;CG18473;CG1889;CG2187;CG30010;CG30151;CG30357;CG31145;CG31267;CG31522;CG3164;CG31694;CG32054;CG321…
jaspar__MA0484.1	4.34	0.0145	Hnf4 (inferredBy_Orthology).	usp (inferredBy_MotifSimilarity).EcR; Hr51; Hr78; svp (inferredBy_MotifSimilarity_n_Orthology).	131	2508	AcCoAS;Adh;Adhr;Aldh;alph;alpha-Est8;Amnionless;Arc42;AstC;Atet;bru2;CG10126;CG11151;CG11317;CG11357;CG13325;CG13516;CG1441;CG15553;CG1673;CG17597;CG2604;CG31145;CG31267;CG31324;CG31522;CG3164;CG31694;CG32054;CG32195;CG32795;CG33110;CG3663;CG40485;CG42240;CG42458;CG4267;CG43222;CG43658;CG44837;CG5590;CG5958;CG6726;CG7457;CG7724;CG8036;CG8814;CG9815;Chd64;cic;cindr;CngA;colt;cpb;Cpr;CPT2;crp;Cyp4d…
cisbp__M4595	4.32	0.0145	grn (inferredBy_Orthology).	HLH3B; pnr (inferredBy_MotifSimilarity_n_Orthology).	248	4378	AcCoAS;Adh;Adhr;Aldh;alph;alpha-Est5;alpha-Est8;Amnionless;AnxB9;Arpc2;aru;Atg17;atk;bmm;bru2;bur;bves;CAHbeta;cert;cg;CG10337;CG10479;CG10512;CG10527;CG10960;CG11241;CG11317;CG11357;CG11594;CG11737;CG11912;CG12065;CG13102;CG13255;CG13325;CG13516;CG13654;CG14245;CG14499;CG14629;CG14945;CG15093;CG15126;CG15152;CG1544;CG15553;CG16727;CG16775;CG16965;CG17549;CG17574;CG18095;CG18249;CG18473;CG2187;CG…
scertf__harbison.GLN3	4.31	0.0145	GATAd; GATAe; grn; pnr; srp (inferredBy_Orthology).		291	4743	Abi;AcCoAS;Akt1;Aldh;alph;alpha-Est5;alpha-Est8;Amnionless;AnxB9;Arpc2;ast;Atet;atk;Bacc;bbc;BicD;bmm;bru2;bves;cg;CG10051;CG10337;CG10341;CG10479;CG10512;CG10527;CG10960;CG11149;CG11151;CG11241;CG11317;CG11357;CG11594;CG11737;CG11899;CG11912;CG12065;CG12811;CG13102;CG13255;CG13325;CG13397;CG13516;CG13654;CG14196;CG14245;CG14439;CG14499;CG14502;CG14629;CG1468;CG14688;CG14945;CG15093;CG15126;CG151…
cisbp__M0257	4.31	0.0145			141	2807	AcCoAS;Ada;Aldh;alph;alpha-Est8;aru;Atg17;bbc;Best2;bru2;bur;bves;cg;CG10126;CG10341;CG10479;CG10960;CG11089;CG11317;CG11899;CG12105;CG12730;CG13325;CG14502;CG14688;CG15093;CG1544;CG15553;CG17574;CG17778;CG17896;CG1910;CG30010;CG30371;CG31145;CG31324;CG31522;CG31694;CG32195;CG32647;CG3335;CG3588;CG3663;CG3690;CG3829;CG40485;CG42458;CG43658;CG4408;CG44837;CG4552;CG5446;CG5510;CG5953;CG6175;CG6287;…
cisbp__M0099	4.3	0.0144			12	89	cg;CG44837;CG4552;CG6726;Cyp1;Dsp1;dsx;klu;Oatp74D;pdm3;Tl;tok
cisbp__M6283	4.26	0.0143	Hnf4 (inferredBy_Orthology).	usp (inferredBy_MotifSimilarity).EcR; Hr78; svp (inferredBy_MotifSimilarity_n_Orthology).	117	2221	Adh;Adhr;Aldh;alph;alpha-Est8;Arc42;Atet;atk;bru2;CG10126;CG10237;CG11151;CG11317;CG11357;CG13325;CG13516;CG15093;CG15553;CG17597;CG31145;CG31267;CG31324;CG31522;CG3164;CG31694;CG32195;CG32795;CG33110;CG42458;CG43222;CG43658;CG44837;CG5590;CG5958;CG6330;CG6726;CG7457;CG7724;CG8036;CG8814;CG9664;CG9815;cic;cindr;CngA;cpb;CPT2;crp;Cyp4d20;dar1;daw;Dbi;DIP-theta;Dot;Dr;dsx;Ect3;Elal;emp;Etf-QO;Fak;F…
jaspar__MA0035.3	4.24	0.0143	grn (inferredBy_Orthology).	HLH3B; Sirt6; pnr (inferredBy_MotifSimilarity_n_Orthology).	269	4876	Abi;AcCoAS;Adh;Adhr;Akt1;Aldh;alph;alpha-Est5;alpha-Est8;Amnionless;AnxB9;Arpc2;aru;Atet;Atg17;atk;Best2;BicD;bmm;bru2;bves;CAHbeta;Cdc42;cert;cg;CG10337;CG10479;CG10512;CG10527;CG10960;CG11241;CG11317;CG11594;CG11737;CG11912;CG12065;CG12811;CG13102;CG13255;CG13325;CG13516;CG13654;CG14245;CG14499;CG14502;CG14629;CG14945;CG15093;CG15126;CG15152;CG1544;CG15553;CG16727;CG16965;CG17549;CG17574;CG1759…
transfac_pro__M02004	4.17	0.0141	grn (inferredBy_Orthology).	pnr (inferredBy_MotifSimilarity_n_Orthology).	268	4929	AcCoAS;Adh;Adhr;Akt1;Aldh;alph;alpha-Est5;Amnionless;AnxB9;Arpc2;aru;Atet;Atg3;atk;Bacc;bbc;Best2;bru2;bves;cert;cg;CG10126;CG10337;CG10479;CG10527;CG10960;CG11151;CG11241;CG11317;CG11737;CG11899;CG11912;CG12065;CG13102;CG13255;CG13325;CG13516;CG13654;CG14245;CG14435;CG14499;CG14502;CG14629;CG14688;CG15093;CG15126;CG15152;CG15210;CG15423;CG1544;CG15553;CG15771;CG16727;CG1673;CG16965;CG17549;CG175…
cisbp__M2286	4.16	0.0141	Hnf4 (inferredBy_Orthology).	usp (inferredBy_MotifSimilarity).EcR; Hr51; Hr78; svp (inferredBy_MotifSimilarity_n_Orthology).	117	2209	AcCoAS;Adh;Adhr;Aldh;alpha-Est8;Amnionless;Arc42;AstC;Atet;bru2;CG10126;CG11151;CG11317;CG11357;CG13325;CG15553;CG17597;CG31145;CG31522;CG3164;CG31694;CG32054;CG32195;CG32795;CG33110;CG3663;CG40485;CG42240;CG42458;CG4267;CG43222;CG43658;CG44837;CG5590;CG5958;CG6726;CG7457;CG7724;CG8036;CG8814;CG9664;CG9815;Chd64;cic;CngA;colt;cpb;Cpr67Fb;CPT2;crp;Cyp4d20;Dad;dar1;daw;Dbi;DIP-theta;Dot;Dr;Dtg;Ect3…
elemento__ATCAGCTG	4.15	0.0141			58	1043	AcCoAS;Atg17;bbc;bves;CG10126;CG11168;CG12065;CG13516;CG14688;CG30010;CG31145;CG31156;CG32549;CG32647;CG3829;CG42458;CG4592;CG4594;CG4743;CG4858;CG6175;CG6330;CG6415;CG6659;CG6726;CG8199;CG8679;CG9270;CG9646;Chd64;cindr;CPT2;crp;Cyp12b2;Cyp6v1;dar1;dsx;Edem1;Elal;emp;Fem-1;klu;Lpin;MFS9;mino;p38a;PCB;Pitslre;Pli;pn;qin;REPTOR;SNF4Agamma;Snmp2;Tl;Tmhs;UK114;Vps60
cisbp__M3315	4.11	0.014	grn (inferredBy_Orthology).		277	4784	Abi;AcCoAS;Adh;Adhr;agt;Aldh;ALiX;alph;alpha-Est5;alpha-Est8;Amnionless;AnxB9;Arpc2;ast;Atg17;atk;Bacc;Best2;BicD;bru2;bur;cert;cg;CG10126;CG10337;CG10479;CG10512;CG10911;CG10960;CG11151;CG11241;CG11317;CG11594;CG11899;CG11912;CG12065;CG13102;CG13255;CG13325;CG13654;CG14245;CG14435;CG14499;CG14502;CG14629;CG14945;CG15093;CG15126;CG15152;CG15423;CG1544;CG15553;CG16727;CG16775;CG17019;CG17549;CG175…
homer__ACTGATAAGA_PQM-1	4.1	0.014		GATAd; GATAe; grn; pnr; srp (inferredBy_MotifSimilarity_n_Orthology).	285	4829	Abi;AcCoAS;agt;Aldh;alph;alpha-Est5;alpha-Est8;Amnionless;AnxB9;Arpc2;ast;Atet;Atg17;atk;Bacc;Best2;bmm;bru2;bur;bves;CAHbeta;cg;CG10126;CG10479;CG10512;CG10527;CG10911;CG10960;CG11241;CG11317;CG11357;CG11594;CG11737;CG11912;CG12065;CG12163;CG12811;CG13102;CG13255;CG13325;CG13397;CG13585;CG13618;CG13654;CG13887;CG14499;CG14502;CG14945;CG15093;CG15126;CG15152;CG15210;CG15423;CG1544;CG1572;CG16727;…
tfdimers__MD00062	4.1	0.014			11	92	CG10479;CG10512;CG13325;CG15152;CG44837;dar1;Etf-QO;klu;pug;SP2637;Wnt2
flyfactorsurvey__BtbVII_SANGER_5_FBgn0012049	4.09	0.014	BtbVII (directAnnotation).		150	3046	5PtaseI;AcCoAS;Acph-1;Ada;Akt1;alph;AnxB9;Atg17;Atg3;Bacc;bmm;bru2;bur;bves;Cdc42;cert;cg;CG10126;CG10960;CG11399;CG12012;CG12105;CG13255;CG13397;CG13865;CG14435;CG15210;CG16727;CG1673;CG17019;CG17549;CG17778;CG17896;CG18473;CG2865;CG30151;CG30371;CG31145;CG31156;CG31324;CG3164;CG31694;CG32647;CG33258;CG3630;CG3663;CG3702;CG3829;CG42240;CG42458;CG42542;CG4297;CG43055;CG43658;CG44837;CG5171;CG6084…
hocomoco__TAL1_MOUSE.H10MO.A	4.09	0.0139	HLH3B (inferredBy_Orthology).	CycT; grn; pnr (inferredBy_MotifSimilarity_n_Orthology).	264	4914	Abi;AcCoAS;Akt1;Aldh;alph;alpha-Est5;alpha-Est8;Amnionless;AnxB9;ArgRS;AstC;Atg17;Atg3;atk;Bacc;Best2;BicD;bmm;bru2;bves;CAHbeta;Cdc42;cert;cg;CG10126;CG10337;CG10479;CG10512;CG10527;CG10960;CG11151;CG11317;CG11594;CG11737;CG11899;CG11912;CG12057;CG12065;CG13102;CG13255;CG13325;CG13516;CG13618;CG13654;CG14196;CG14499;CG14502;CG14629;CG14945;CG15093;CG15126;CG15152;CG15210;CG1544;CG15579;CG16727;C…
cisbp__M1489	4.06	0.0139			139	2791	Abi;Ada;alph;Arc42;Arpc2;Atet;Atg17;Atg3;Bacc;bbc;Best2;BicD;bmm;bru2;cg;CG10663;CG10960;CG11151;CG11317;CG11399;CG11843;CG12065;CG13325;CG13397;CG15093;CG1572;CG16904;CG17019;CG17574;CG1910;CG2865;CG30371;CG30423;CG3077;CG31145;CG3164;CG31694;CG3663;CG42458;CG43222;CG43658;CG44837;CG4552;CG5446;CG5958;CG6084;CG6175;CG6287;CG6330;CG6726;CG6767;CG6951;CG7457;CG7724;CG8036;CG8539;CG8814;CG9084;CG94…
cisbp__M4320	4.04	0.0138	GATAd; GATAe; grn; pnr; srp (inferredBy_Orthology).		278	4844	Abi;AcCoAS;Adh;Adhr;Aldh;alph;alpha-Est5;alpha-Est8;Amnionless;AnxB9;Arpc2;Atg17;atk;Bacc;BicD;bmm;bru2;CAHbeta;cg;CG10051;CG10337;CG10479;CG10512;CG10527;CG10960;CG11151;CG11241;CG11317;CG11357;CG11737;CG11899;CG11912;CG12065;CG13085;CG13102;CG13255;CG13325;CG13397;CG13618;CG13654;CG13887;CG14196;CG14245;CG14499;CG14502;CG14629;CG14688;CG14945;CG15093;CG15126;CG15210;CG15423;CG1544;CG15579;CG167…
predrem__nrMotif1022	4.04	0.0138			110	2243	Ada;Akt1;alph;AnxB9;Arpc2;Atet;Bacc;Best2;BicD;bmm;bru2;cg;CG10237;CG10527;CG10663;CG10960;CG11089;CG11317;CG11357;CG12012;CG13325;CG14688;CG1544;CG15771;CG16965;CG1910;CG2818;CG2865;CG30371;CG31145;CG31522;CG3335;CG33474;CG4267;CG4297;CG43055;CG43658;CG44837;CG5510;CG6175;CG6685;CG6767;CG7724;CG8036;CG8128;CG8157;CG9498;CG9643;CG9921;CG9945;Chd64;cic;cindr;cpb;Cpr67Fb;crp;Cyp12b2;dar1;daw;Dr;dsx…
cisbp__M0772	4.02	0.0138			276	4926	Abi;AcCoAS;Akt1;Aldh;alph;alpha-Est8;Amnionless;Arpc2;ast;Atet;Atg17;Atg3;atk;Bacc;BicD;bmm;bru2;bur;cg;CG10126;CG10479;CG10512;CG10527;CG10911;CG10960;CG11089;CG11149;CG11151;CG11241;CG11317;CG11594;CG11737;CG11912;CG12065;CG12730;CG13255;CG13325;CG13585;CG13618;CG13654;CG13887;CG14435;CG14499;CG14502;CG1468;CG14945;CG15093;CG15423;CG1544;CG15553;CG1572;CG16727;CG16775;CG16965;CG17019;CG17292;CG…
cisbp__M0782	4.02	0.0138	pnr (inferredBy_Orthology).	GATAe (inferredBy_MotifSimilarity).CycT; GATAd; HLH3B; grn; srp (inferredBy_MotifSimilarity_n_Orthology).	286	4469	Abi;AcCoAS;Adh;Adhr;Aldh;alph;alpha-Est5;alpha-Est8;Amnionless;AnxB9;Arc1;Arpc2;aru;arx;Atet;Atg17;Bacc;Best2;bru2;bur;bves;cert;cg;CG10051;CG10337;CG10479;CG10527;CG10911;CG10960;CG10962;CG11149;CG11151;CG11241;CG11317;CG11357;CG11594;CG11737;CG11899;CG11912;CG12065;CG13102;CG13255;CG13325;CG13516;CG13618;CG13654;CG14245;CG14435;CG14499;CG14502;CG14629;CG1468;CG14688;CG14945;CG15093;CG15126;CG15…
hocomoco__GATA4_HUMAN.H10MO.B	4.02	0.0138	pnr (inferredBy_Orthology).	grn (inferredBy_MotifSimilarity_n_Orthology).	261	4999	AcCoAS;Adh;Adhr;Akt1;Aldh;alph;alpha-Est5;alpha-Est8;Amnionless;AnxB9;Arpc2;aru;AstC;Atg17;atk;Bacc;Best2;bru2;bur;bves;cert;cg;CG10126;CG10337;CG10479;CG10512;CG10527;CG10911;CG10960;CG11149;CG11241;CG11317;CG11357;CG11594;CG11737;CG11912;CG12065;CG13102;CG13255;CG13325;CG13516;CG13618;CG14245;CG14435;CG14499;CG14629;CG14688;CG15093;CG15126;CG15152;CG15210;CG1544;CG15553;CG16727;CG16965;CG17574;…
transfac_public__M00346	4	0.0137	grn (inferredBy_Orthology).		279	4868	AcCoAS;Adh;Adhr;agt;Akt1;Aldh;alph;alpha-Est8;Amnionless;AnxB9;Arpc2;ast;Atg17;Atg3;atk;Bacc;Best2;BicD;bru2;bur;cert;cg;CG10126;CG10337;CG10479;CG10512;CG10911;CG10960;CG11149;CG11151;CG11241;CG11317;CG11357;CG11594;CG11899;CG11912;CG12065;CG13255;CG13325;CG13654;CG14245;CG14435;CG14499;CG14502;CG14629;CG14945;CG15093;CG15126;CG15152;CG15423;CG1544;CG15553;CG16727;CG16775;CG16965;CG17549;CG17574…
hocomoco__GATA3_MOUSE.H10MO.C	3.96	0.0136	grn (inferredBy_Orthology).	CycT; pnr (inferredBy_MotifSimilarity_n_Orthology).	230	4252	AcCoAS;Adh;Adhr;Akt1;Aldh;alph;alpha-Est5;Amnionless;AnxB9;Arpc2;aru;Atg17;Best2;BicD;bru2;bves;cert;CG10337;CG10479;CG10512;CG10527;CG10911;CG10960;CG10962;CG11241;CG11317;CG11737;CG11912;CG12065;CG13102;CG13255;CG13325;CG13516;CG13618;CG14245;CG14435;CG14499;CG14629;CG14688;CG15093;CG15126;CG15152;CG15210;CG1544;CG15553;CG16727;CG17574;CG18095;CG18249;CG18473;CG2187;CG2865;CG30010;CG30151;CG303…
swissregulon__sacCer__GZF3	3.95	0.0136	GATAd; GATAe; grn; pnr; srp (inferredBy_Orthology).		253	4760	AcCoAS;Adh;Adhr;Akt1;Aldh;alph;alpha-Est5;alpha-Est8;Amnionless;Arpc2;aru;Atet;atk;Bacc;BicD;bmm;bru2;CAHbeta;cert;cg;CG10208;CG10337;CG10479;CG10512;CG10911;CG10960;CG11149;CG11151;CG11168;CG11241;CG11317;CG11357;CG11399;CG11594;CG11737;CG11899;CG11912;CG12065;CG13102;CG13255;CG13325;CG13397;CG13654;CG14196;CG1441;CG14435;CG14499;CG14502;CG14629;CG14688;CG14945;CG15093;CG15126;CG15152;CG15423;CG…
tiffin__TIFDMEM0000062	3.94	0.0136			226	4557	5PtaseI;AcCoAS;Acph-1;Ada;Akt1;alph;alpha-Est8;Amnionless;Arpc2;aru;Atet;Atg3;Bacc;Best2;bmm;bru2;bur;bves;CAHbeta;Cbp80;Cdc42;cg;CG10126;CG10237;CG10337;CG10341;CG10479;CG10663;CG10960;CG11317;CG11357;CG11899;CG12065;CG12105;CG12163;CG12730;CG13255;CG13585;CG14435;CG14945;CG15083;CG15093;CG15210;CG15553;CG1572;CG1667;CG16965;CG17019;CG17549;CG17660;CG17778;CG17896;CG18473;CG1910;CG2865;CG30010;C…
cisbp__M6255	3.94	0.0136	grn (inferredBy_Orthology).	pnr (inferredBy_MotifSimilarity_n_Orthology).	219	3973	AcCoAS;Adh;Adhr;Akt1;Aldh;alph;alpha-Est5;Amnionless;AnxB9;Arpc2;aru;Atg17;Best2;bru2;bves;cert;CG10337;CG10479;CG10512;CG10527;CG10911;CG10960;CG10962;CG11241;CG11912;CG12065;CG13102;CG13255;CG13325;CG13516;CG14245;CG14435;CG14499;CG14629;CG14688;CG15093;CG15126;CG15152;CG15210;CG1544;CG15553;CG16727;CG17574;CG18095;CG18249;CG18473;CG2187;CG2865;CG30010;CG30151;CG30357;CG30371;CG31145;CG31267;CG…
hocomoco__HNF4G_MOUSE.H10MO.C	3.93	0.0136		Hnf4 (inferredBy_MotifSimilarity).	14	146	CG5590;daw;Etf-QO;Fem-1;Hug;LpR1;MEP-1;Mtpalpha;pdgy;pdm3;Pitslre;WASp;whd;yip2
homer__GCTGATAASV_Unknown5	3.93	0.0136			273	4829	Abi;AcCoAS;Aldh;alpha-Est8;Amnionless;Arpc2;ast;Atet;Atg17;Bacc;Best2;BicD;bmm;bru2;bur;cg;CG10126;CG10208;CG10479;CG10512;CG10911;CG10960;CG11089;CG11149;CG11151;CG11241;CG11317;CG11357;CG11594;CG11737;CG11912;CG12065;CG13102;CG13255;CG13325;CG13654;CG14499;CG14502;CG14629;CG1468;CG14945;CG15093;CG15210;CG15423;CG1544;CG15553;CG16727;CG16775;CG16965;CG17292;CG17549;CG17574;CG17660;CG17896;CG1847…
transfac_pro__M07628	3.92	0.0135	TfAP-2 (directAnnotation).		14	118	CG31145;CG42329;CG5999;CG7724;CG9815;Chd64;dar1;klu;Lrt;msn;Proc;qin;REPTOR;RhoGAP68F
flyfactorsurvey__Cf2-PB_SANGER_5_FBgn0000286	3.91	0.0135	Cf2 (directAnnotation).		35	592	Atet;Bacc;cg;CG10960;CG6951;CG7724;CG8468;CG9921;Chd64;cib;cic;cpa;cpb;Cyp1;Cyp12b2;dar1;DIP-theta;Dsp1;dsx;Etf-QO;Fem-1;Hip14;Hr39;Lerp;MEP-1;Oatp74D;pdm3;Rab11;REPTOR;Sap130;srp;Taldo;Tl;ttv;vvl
transfac_pro__M07725	3.9	0.0135	GATAe (directAnnotation).		285	4948	Abi;AcCoAS;agt;Akt1;Aldh;alph;alpha-Est5;alpha-Est8;Amnionless;Arpc2;ast;Atg17;atk;Bacc;bmm;bru2;bur;cert;CG10051;CG10337;CG10479;CG10512;CG10527;CG10911;CG10960;CG11151;CG11241;CG11317;CG11357;CG11594;CG11737;CG11912;CG12065;CG13102;CG13255;CG13325;CG13397;CG13618;CG13654;CG13887;CG14196;CG14245;CG14435;CG14499;CG14502;CG14629;CG1468;CG14688;CG14945;CG15093;CG15126;CG15423;CG1544;CG15553;CG15579…
taipale_tf_pairs__FOXO1_HOXB13_RWMAACASYMRTWAAA_CAP_repr	3.9	0.0135	Abd-B; foxo (inferredBy_Orthology).		13	130	CAHbeta;CG13325;CG14435;CG30371;CG4297;CG4408;CG5953;klu;Lrch;msn;Obp56d;pdm3;SNF4Agamma
cisbp__M6256	3.9	0.0135	pnr (inferredBy_Orthology).	grn (inferredBy_MotifSimilarity_n_Orthology).	248	4713	AcCoAS;Adh;Adhr;Akt1;Aldh;alph;alpha-Est5;alpha-Est8;Amnionless;AnxB9;Arpc2;aru;AstC;Atg17;atk;Bacc;Best2;bru2;bur;bves;cert;cg;CG10126;CG10337;CG10479;CG10512;CG10527;CG10911;CG10960;CG11149;CG11241;CG11317;CG11357;CG11594;CG11737;CG11912;CG12065;CG13102;CG13255;CG13325;CG13516;CG13618;CG14245;CG14435;CG14499;CG14629;CG14688;CG15093;CG15126;CG15152;CG15210;CG1544;CG15553;CG16727;CG16965;CG17574;…
flyfactorsurvey__GATAd_SANGER_5_FBgn0032223	3.9	0.0135	GATAd (directAnnotation).		264	4641	Abi;AcCoAS;Acph-1;Akt1;Aldh;alph;alpha-Est8;Amnionless;Arpc2;aru;Atet;Atg17;Bacc;Best2;BicD;bmm;bru2;bur;CAHbeta;cg;CG10051;CG10126;CG10341;CG10479;CG10512;CG10527;CG10960;CG11149;CG11151;CG11241;CG11317;CG11594;CG11737;CG11912;CG12065;CG12811;CG13102;CG13255;CG13325;CG13585;CG13618;CG13654;CG13887;CG14499;CG14502;CG1468;CG14945;CG15093;CG15126;CG15152;CG15423;CG1544;CG15553;CG15579;CG16727;CG167…
cisbp__M0684	3.89	0.0135			74	1373	Akt1;AstC;Atet;Bacc;Best2;bru2;CAHbeta;cg;CG10663;CG10960;CG13397;CG1910;CG2865;CG31522;CG3164;CG3588;CG3829;CG43658;CG44837;CG4660;CG5510;CG5953;CG6685;CG6726;CG6951;CG7724;CG8468;CG9837;CG9921;Chd64;cic;cpb;crp;Cyp1;Cyp6v1;dar1;Def;Dr;Dsp1;dsx;emp;Etf-QO;glec;grk;hfp;HPS4;Hr39;ImpL2;key;l(1)G0469;Lerp;Lpin;Lrch;MEP-1;msn;Mvb12;Oatp74D;Pak3;pdm3;Pitslre;Pli;Pp1alpha-96A;REPTOR;Rm62;SNF4Agamma;sr…
swissregulon__sacCer__DAL80	3.89	0.0135	GATAd; GATAe; grn; pnr; srp (inferredBy_Orthology).		280	4910	Abi;AcCoAS;Akt1;Aldh;alph;alpha-Est5;alpha-Est8;Amnionless;Arpc2;ast;Atet;Atg17;atk;Bacc;bbc;BicD;bmm;bru2;CAHbeta;CG10051;CG10337;CG10479;CG10527;CG10911;CG10960;CG11149;CG11151;CG11317;CG11357;CG11399;CG11737;CG11899;CG11912;CG12057;CG12065;CG13102;CG13255;CG13325;CG13397;CG13618;CG13654;CG13887;CG14196;CG14245;CG14499;CG14502;CG14629;CG1468;CG14688;CG14945;CG15093;CG15126;CG15423;CG1544;CG1555…
jaspar__MA0482.1	3.89	0.0135	pnr (inferredBy_Orthology).	CycT; HLH3B; grn (inferredBy_MotifSimilarity_n_Orthology).	261	4791	AcCoAS;Adh;Adhr;Akt1;Aldh;alph;alpha-Est5;alpha-Est8;Amnionless;AnxB9;Arpc2;aru;Atg17;atk;Best2;BicD;bmm;bru2;bves;CAHbeta;cert;cg;CG10051;CG10479;CG10512;CG10527;CG10960;CG11151;CG11241;CG11317;CG11357;CG11399;CG11594;CG11737;CG11912;CG12065;CG13102;CG13255;CG13325;CG13585;CG13654;CG14196;CG14245;CG14499;CG14502;CG14629;CG15093;CG15126;CG15152;CG15210;CG1544;CG15553;CG16727;CG16965;CG17549;CG175…
cisbp__M3314	3.87	0.0134	grn (inferredBy_Orthology).	pnr (inferredBy_MotifSimilarity_n_Orthology).	205	3595	AcCoAS;Adh;Adhr;Akt1;Aldh;alph;alpha-Est5;Amnionless;AnxB9;Arpc2;aru;atk;Bacc;Best2;bru2;cg;CG10126;CG10337;CG10479;CG10512;CG10527;CG10911;CG10960;CG11151;CG11241;CG11737;CG12065;CG13102;CG13255;CG13325;CG13516;CG13654;CG14245;CG14499;CG14629;CG15093;CG15152;CG15210;CG1544;CG15553;CG15771;CG16727;CG16965;CG17597;CG17660;CG18249;CG18473;CG2187;CG30010;CG30357;CG30371;CG31075;CG31145;CG31267;CG313…
cisbp__M2126	3.87	0.0134			11	91	CG44837;CG7724;CG8539;cic;dar1;Hr39;Idh;knrl;Pak3;Pli;REPTOR
cisbp__M0795	3.86	0.0134	GATAd; GATAe; grn; pnr; srp (inferredBy_Orthology).		302	4961	Abi;AcCoAS;Adh;Adhr;Akt1;Aldh;alph;alpha-Est5;alpha-Est8;Amnionless;AnxB9;Arpc2;aru;ast;Atg17;atk;Bacc;BicD;bmm;bru2;bur;cg;CG10051;CG10126;CG10337;CG10479;CG10512;CG10527;CG10911;CG10960;CG10962;CG11151;CG11241;CG11317;CG11357;CG11594;CG11737;CG11912;CG12065;CG13102;CG13255;CG13325;CG13397;CG13516;CG13618;CG13654;CG14196;CG14245;CG14435;CG14499;CG14502;CG14629;CG1468;CG14688;CG14945;CG15093;CG15…
elemento__ACATATG	3.86	0.0134			33	529	Akt1;Aldh;Bacc;bru2;CG10479;CG11317;CG14688;CG2865;CG3588;CG4297;CG43658;CG8036;CG8468;CG9270;CG9837;CG9921;cpb;Cyp1;Dsp1;Dtg;gw;Hr39;LpR1;Mdh1;MEP-1;Mvb12;pdm3;REPTOR;srp;Taldo;Tk;Tl;tok
transfac_pro__M06480	3.85	0.0134			12	103	alpha-Est8;Arc1;CG10479;CG31145;cpb;Dr;Gk2;klu;knrl;pdm3;REPTOR;Rox8
transfac_pro__M06882	3.85	0.0134	CG17829 (inferredBy_Orthology).		36	563	BicD;bru2;CG10960;CG11737;CG14245;CG14445;CG1673;CG3164;CG43055;CG5707;CG8468;CG9555;CG9815;cic;Cyp1;dar1;DIP-theta;Dr;Dsp1;dsx;Fak;GstE12;ImpL2;klu;loco;msn;p38a;pdm3;Peritrophin-A;Pli;rost;SNF4Agamma;Tl;tok;Tsp42Ee;ttv
yetfasco__YDR259C_599	3.84	0.0134		CG7786; Pdp1; gt; vri (inferredBy_MotifSimilarity_n_Orthology).	226	4992	5PtaseI;Abi;AcCoAS;Acph-1;Ada;Akt1;Aldh;alph;aru;ast;Atet;Atg10;Atg3;Bacc;Best2;BicD;bmm;bru2;bur;bves;Cdc42;cert;cg;CG10237;CG10479;CG10512;CG10674;CG10960;CG11317;CG11399;CG11539;CG11899;CG12065;CG12163;CG12730;CG13255;CG13325;CG13397;CG13585;CG14435;CG14688;CG15083;CG15093;CG15126;CG16727;CG16965;CG17019;CG17574;CG17660;CG18258;CG1910;CG2865;CG30151;CG30371;CG3077;CG31145;CG31156;CG31324;CG315…
cisbp__M0087	3.83	0.0133			23	333	Akt1;Bacc;cg;CG3588;CG44837;CG4552;CG6726;CG6951;CG7724;CG9921;Cyp1;DIP-theta;Dr;Dsp1;dsx;klu;MEP-1;Oatp74D;pdm3;REPTOR;Taldo;Tl;tok
jaspar__MA0321.1	3.8	0.0133			12	111	CG44837;CG7724;CG8539;cic;dar1;Hr39;Idh;knrl;MEP-1;Pak3;Pli;REPTOR
cisbp__M0737	3.78	0.0132	fd96Ca; fd96Cb (inferredBy_Orthology).	slp1 (inferredBy_MotifSimilarity).bin; croc; fd59A; fkh; foxo (inferredBy_MotifSimilarity_n_Orthology).	29	391	Akt1;cg;CG2865;CG31145;CG31324;CG4297;CG43658;CG5953;CG6726;CG7724;CG9837;CG9921;cpb;Cyp1;Dr;Dsp1;Etf-QO;klu;LpR1;Lrch;mbc;Mdh1;MEP-1;olf186-M;Pp1alpha-96A;SNF4Agamma;srp;Taldo;tok
cisbp__M4982	3.78	0.0132	GATAd (directAnnotation).		287	4990	Abi;AcCoAS;Acph-1;Adh;Adhr;Akt1;Aldh;alph;alpha-Est8;Amnionless;ArgRS;Arpc2;aru;Atet;Atg17;Bacc;Best2;BicD;bmm;bru2;bur;bves;CAHbeta;cg;CG10051;CG10126;CG10479;CG10512;CG10527;CG10911;CG10960;CG11089;CG11149;CG11151;CG11241;CG11317;CG11594;CG11737;CG11912;CG12065;CG12811;CG13102;CG13255;CG13325;CG13585;CG13618;CG13654;CG13887;CG14435;CG14499;CG14502;CG1468;CG14945;CG15093;CG15126;CG15152;CG15423;…
cisbp__M1867	3.78	0.0132	grn (inferredBy_Orthology).	HLH3B; Sirt6; pnr (inferredBy_MotifSimilarity_n_Orthology).	267	4824	Abi;AcCoAS;Ada;Adh;Adhr;Akt1;Aldh;alph;alpha-Est5;Amnionless;AnxB9;aru;Atg17;atk;Best2;BicD;bmm;bru2;bves;CAHbeta;Cdc42;cert;cg;CG10337;CG10479;CG10512;CG10527;CG10960;CG11151;CG11241;CG11317;CG11357;CG11594;CG11737;CG11912;CG12065;CG13085;CG13102;CG13255;CG13325;CG13516;CG13654;CG14245;CG14499;CG14502;CG14629;CG14945;CG15093;CG15126;CG15152;CG15423;CG1544;CG15553;CG16727;CG16965;CG17549;CG17574;…
jaspar__MA0289.1	3.77	0.0132	GATAd; GATAe; grn; pnr; srp (inferredBy_Orthology).		261	4334	Abi;AcCoAS;Akt1;Aldh;alph;alpha-Est5;alpha-Est8;Amnionless;Arpc2;Atg17;atk;Bacc;bbc;BicD;bmm;bru2;bur;cg;CG10051;CG10337;CG10479;CG10911;CG10960;CG11151;CG11317;CG11357;CG11399;CG11737;CG11912;CG12057;CG12065;CG13102;CG13255;CG13325;CG13397;CG13618;CG13654;CG13887;CG14245;CG14499;CG14502;CG14629;CG1468;CG14688;CG14945;CG15093;CG15126;CG15423;CG1544;CG15484;CG15553;CG15579;CG1673;CG16775;CG16965;C…
transfac_pro__M01619	3.76	0.0132	GATAd; GATAe; grn; pnr; srp (inferredBy_Orthology).		261	4336	Abi;AcCoAS;Akt1;Aldh;alph;alpha-Est5;alpha-Est8;Amnionless;Arpc2;Atg17;atk;Bacc;bbc;BicD;bmm;bru2;bur;cg;CG10051;CG10337;CG10479;CG10911;CG10960;CG11151;CG11317;CG11357;CG11399;CG11737;CG11912;CG12057;CG12065;CG13102;CG13255;CG13325;CG13397;CG13618;CG13654;CG13887;CG14245;CG14499;CG14502;CG14629;CG1468;CG14688;CG14945;CG15093;CG15126;CG15423;CG1544;CG15484;CG15553;CG15579;CG1673;CG16775;CG16965;C…
cisbp__M6254	3.75	0.0132	grn (inferredBy_Orthology).	CycT; HLH3B; pnr (inferredBy_MotifSimilarity_n_Orthology).	242	4454	AcCoAS;Adh;Adhr;agt;Akt1;Aldh;alph;alpha-Est5;Amnionless;AnxB9;Arpc2;aru;AstC;Atg17;atk;Best2;BicD;bru2;bves;cert;cg;CG10337;CG10479;CG10512;CG10527;CG10663;CG10911;CG10960;CG11151;CG11241;CG11317;CG11357;CG11737;CG11899;CG12065;CG13102;CG13255;CG13325;CG13516;CG13618;CG13654;CG14245;CG14499;CG14502;CG14629;CG14688;CG15093;CG15126;CG15152;CG15210;CG15423;CG1544;CG15553;CG16727;CG16965;CG17574;CG1…
taipale__E2F7_DBD_TTTTCCCGCCAAAW_repr	3.75	0.0131		E2f2 (inferredBy_MotifSimilarity_n_Orthology).	11	84	Art1;BicD;CG42458;cic;Dsp1;Elal;glec;klu;REPTOR;Tl;ttv
transfac_pro__M01877	3.74	0.0131	grn (inferredBy_Orthology).		269	4506	Abi;AcCoAS;Adh;Adhr;Akt1;Aldh;alph;alpha-Est5;alpha-Est8;Amnionless;AnxB9;Arpc2;aru;arx;Atg17;Bacc;BicD;bru2;bur;bves;cg;CG10051;CG10208;CG10337;CG10479;CG10527;CG10911;CG10960;CG10962;CG11149;CG11151;CG11317;CG11357;CG11737;CG11899;CG11912;CG12065;CG12096;CG13102;CG13177;CG13255;CG13325;CG13516;CG13618;CG14245;CG14435;CG14499;CG14502;CG14629;CG1468;CG15093;CG15126;CG15210;CG15423;CG1544;CG15553;…
cisbp__M4715	3.72	0.0131			181	2911	Abi;AcCoAS;alpha-Est8;Amnionless;Arpc2;aru;Atet;Atg17;Bacc;BicD;bmm;bru2;bur;CAHbeta;cg;CG10512;CG10960;CG11241;CG11317;CG11594;CG11737;CG12065;CG12811;CG13255;CG13325;CG13618;CG13654;CG14196;CG14499;CG15093;CG15423;CG1544;CG16727;CG16775;CG16965;CG17549;CG17574;CG17896;CG18473;CG2865;CG30010;CG30371;CG31075;CG31145;CG31156;CG31267;CG31522;CG31694;CG32054;CG32549;CG33510;CG33514;CG3529;CG3534;CG3…
cisbp__M2284	3.71	0.013	pnr (inferredBy_Orthology).	CycT; HLH3B; grn (inferredBy_MotifSimilarity_n_Orthology).	267	4888	AcCoAS;Adh;Adhr;Akt1;Aldh;alpha-Est5;alpha-Est8;Amnionless;AnxB9;Arpc2;aru;Atg17;Atg3;atk;Best2;BicD;bmm;bru2;bves;CAHbeta;cert;cg;CG10051;CG10337;CG10479;CG10527;CG10960;CG11151;CG11241;CG11317;CG11357;CG11594;CG11737;CG11899;CG11912;CG12065;CG13102;CG13255;CG13325;CG13585;CG13654;CG14196;CG14245;CG14499;CG14502;CG14629;CG14945;CG15093;CG15126;CG15152;CG15210;CG1544;CG15553;CG16727;CG16965;CG175…
cisbp__M0796	3.71	0.013	GATAd; GATAe; grn; pnr; srp (inferredBy_Orthology).		298	4882	Abi;AcCoAS;Akt1;Aldh;alph;alpha-Est5;alpha-Est8;Amnionless;AnxB9;Arc1;Arpc2;arx;ast;Atet;Atg17;atk;Bacc;Best2;bru2;bur;bves;cert;cg;CG10051;CG10126;CG10208;CG10337;CG10479;CG10527;CG10911;CG10960;CG10962;CG11149;CG11151;CG11241;CG11317;CG11357;CG11399;CG11737;CG11912;CG12012;CG12065;CG12096;CG13102;CG13177;CG13255;CG13325;CG13516;CG14245;CG14435;CG14499;CG14502;CG14629;CG1468;CG14688;CG14945;CG15…
cisbp__M4656	3.7	0.013	grn (inferredBy_Orthology).	CycT; HLH3B; pnr (inferredBy_MotifSimilarity_n_Orthology).	251	4759	Abi;AcCoAS;Ada;Akt1;Aldh;alph;alpha-Est8;Amnionless;AnxB9;ArgRS;Arpc2;aru;AstC;Atet;Atg17;Atg3;atk;Bacc;Best2;BicD;bmm;bru2;bves;CAHbeta;Cdc42;cert;cg;CG10337;CG10479;CG10527;CG10960;CG11151;CG11317;CG11357;CG11594;CG11737;CG11899;CG11912;CG12065;CG13102;CG13255;CG13325;CG13516;CG13618;CG13654;CG14245;CG1441;CG14435;CG14499;CG14629;CG14688;CG14945;CG15093;CG15126;CG15152;CG15210;CG1544;CG16727;CG…
neph__UW.Motif.0654	3.69	0.013			13	142	Akt1;bru2;CG10126;CG8199;dar1;Dr;Faa;HPS1;lama;Pitslre;Tl;tok;wit
transfac_pro__M03828	3.68	0.013	Hnf4 (inferredBy_Orthology).	usp (inferredBy_MotifSimilarity).ERR; EcR; Hr38; Hr51; Hr78; fkh; svp (inferredBy_MotifSimilarity_n_Orthology).	133	2595	Ada;Adh;Adhr;Aldh;alph;Amnionless;Arc42;AstC;Atet;Atg9;atk;bru2;CG10126;CG10237;CG10960;CG11151;CG11317;CG11357;CG13325;CG13516;CG13618;CG1441;CG15093;CG15553;CG31145;CG31267;CG31324;CG31522;CG3164;CG31694;CG32195;CG32647;CG32795;CG33110;CG34284;CG3663;CG42458;CG43222;CG43658;CG44837;CG5510;CG5590;CG5707;CG5958;CG6330;CG6726;CG7376;CG7457;CG7724;CG8036;CG8468;CG8814;CG8839;CG9815;cindr;CngA;cpb;C…
cisbp__M0785	3.68	0.013	pnr (inferredBy_Orthology).	grn; srp (inferredBy_MotifSimilarity).GATAd; GATAe (inferredBy_MotifSimilarity_n_Orthology).	277	4541	Abi;AcCoAS;Adh;Adhr;Akt1;Aldh;alph;alpha-Est5;alpha-Est8;Amnionless;AnxB9;Arc1;Arpc2;arx;ast;Atet;Atg17;Bacc;Best2;bru2;bur;bves;cg;CG10051;CG10337;CG10479;CG10527;CG10911;CG10960;CG11149;CG11151;CG11241;CG11357;CG11399;CG11594;CG11737;CG11899;CG11912;CG12057;CG12065;CG13102;CG13255;CG13325;CG13516;CG14245;CG14435;CG14499;CG14502;CG14629;CG14688;CG14945;CG15093;CG15126;CG15152;CG15210;CG15423;CG1…
hocomoco__GATA1_HUMAN.H10MO.A	3.67	0.013	grn (inferredBy_Orthology).	CycT; HLH3B; pnr (inferredBy_MotifSimilarity_n_Orthology).	245	4455	Abi;AcCoAS;Akt1;Aldh;alph;alpha-Est8;Amnionless;AnxB9;ArgRS;Atet;Atg17;Atg3;atk;Bacc;Best2;BicD;bmm;bru2;bves;CAHbeta;Cdc42;cert;cg;CG10479;CG10512;CG10960;CG11151;CG11317;CG11357;CG11594;CG11737;CG11912;CG12065;CG13102;CG13255;CG13325;CG13516;CG13618;CG13654;CG1441;CG14499;CG14502;CG14629;CG14688;CG14945;CG15093;CG15126;CG15152;CG15210;CG1544;CG16727;CG16965;CG17549;CG17597;CG17896;CG18095;CG182…
predrem__nrMotif2606	3.64	0.0129			7	36	bru2;Dr;msn;Oatp74D;Pdi;Pms2;Rab11
flyfactorsurvey__ttk-PA_SOLEXA_FBgn0003870	3.63	0.0129	ttk (directAnnotation).	seq (inferredBy_MotifSimilarity).	12	114	Bacc;bru2;CG12065;CG13325;CG3408;CG42458;CG9084;Dr;egr;Fem-1;p38a;REPTOR
transfac_pro__M02756	3.63	0.0129	pnr (inferredBy_Orthology).	GATAd; GATAe; grn; srp (inferredBy_MotifSimilarity_n_Orthology).	288	4996	Abi;AcCoAS;Adh;Adhr;agt;Aldh;alph;alpha-Est5;alpha-Est8;Amnionless;AnxB9;Arpc2;aru;Atet;Atg17;Atg3;atk;Bacc;bmm;bru2;bur;bves;CAHbeta;cg;CG10051;CG10208;CG10337;CG10479;CG10512;CG10527;CG10911;CG10960;CG11149;CG11151;CG11241;CG11317;CG11357;CG11594;CG11737;CG11912;CG12065;CG12811;CG13255;CG13325;CG13397;CG13654;CG13887;CG14196;CG14499;CG14502;CG14629;CG14945;CG15093;CG15126;CG15210;CG15423;CG1544…
transfac_public__M00128	3.61	0.0128	grn (inferredBy_Orthology).	pnr (inferredBy_MotifSimilarity_n_Orthology).	204	3574	AcCoAS;Adh;Adhr;Akt1;Aldh;alpha-Est5;Amnionless;AnxB9;Arpc2;aru;atk;Bacc;Best2;bru2;cg;CG10126;CG10337;CG10479;CG10512;CG10527;CG10911;CG10960;CG11151;CG11241;CG11737;CG12065;CG13102;CG13255;CG13325;CG13516;CG13654;CG14245;CG14435;CG14499;CG14629;CG15093;CG15152;CG15210;CG1544;CG15553;CG15771;CG16727;CG16965;CG17597;CG17660;CG18249;CG18473;CG2187;CG30010;CG30357;CG30371;CG31075;CG31145;CG31267;CG…
cisbp__M5476	3.6	0.0128	grn (inferredBy_Orthology).	pnr; srp (inferredBy_MotifSimilarity).CycT; GATAd; GATAe; HLH3B (inferredBy_MotifSimilarity_n_Orthology).	281	4513	Abi;AcCoAS;Acph-1;Adh;Adhr;Aldh;alph;alpha-Est5;alpha-Est8;Amnionless;AnxB9;Arc1;Arpc2;aru;arx;ast;Atet;Atg17;Bacc;Best2;BicD;bmm;bru2;bur;bves;cg;CG10051;CG10337;CG10479;CG10527;CG10911;CG10960;CG11149;CG11151;CG11241;CG11317;CG11357;CG11737;CG11899;CG11912;CG12065;CG13102;CG13255;CG13325;CG13516;CG13654;CG14245;CG14499;CG14502;CG14629;CG1468;CG14945;CG15093;CG15126;CG15152;CG15210;CG15423;CG154…
flyfactorsurvey__CG12605_SOLEXA_5_FBgn0035481	3.59	0.0128	CG12605 (directAnnotation).	Kah; scrt (inferredBy_MotifSimilarity).	24	376	AstC;Best2;CG11089;CG1441;CG15093;CG16965;CG30151;CG42458;CG5171;CG7900;Dbi;DIP-theta;Ect3;fus;HPS4;Hr39;klu;knrl;loco;pdm3;rogdi;Tk;Tsp42Ee;ttv
transfac_pro__M02016	3.59	0.0128	Hnf4 (inferredBy_Orthology).	svp; usp (inferredBy_MotifSimilarity_n_Orthology).	94	1805	AcCoAS;Adh;Adhr;Aldh;alph;Arc42;Atet;atk;bru2;CG10126;CG11317;CG11357;CG13516;CG15093;CG15553;CG17597;CG31145;CG31267;CG31522;CG3164;CG31694;CG32795;CG33110;CG43222;CG43658;CG5590;CG5707;CG5958;CG6175;CG6330;CG6726;CG7457;CG7724;CG8036;CG8468;CG8539;CG8814;CG9498;CG9815;cindr;CngA;cpb;CPT2;crp;Cyp4d20;dar1;daw;Dot;Dr;dsx;Ect3;emp;Etf-QO;Fem-1;fus;Gk2;Hr39;Hug;Idh;ImpL2;Indy;klu;l(1)G0193;Lpin;LpR…
cisbp__M5529	3.58	0.0127	Hnf4 (inferredBy_Orthology).	Hr78; svp; usp (inferredBy_MotifSimilarity_n_Orthology).	165	3221	AcCoAS;Adh;Adhr;Akt1;Aldh;alpha-Est8;Arc42;AstC;Atet;Atg17;atk;Bacc;bmm;bru2;bves;CG10126;CG10237;CG10479;CG10663;CG10960;CG11151;CG11317;CG11357;CG12012;CG12065;CG13516;CG13618;CG15093;CG15553;CG15771;CG17019;CG17292;CG17597;CG2604;CG2865;CG30010;CG31145;CG31267;CG31324;CG31522;CG3164;CG31694;CG32195;CG32795;CG33110;CG3663;CG3829;CG42240;CG42458;CG4267;CG43222;CG43658;CG4408;CG44837;CG4594;CG482…
taipale__GATA3_DBD_AGATAANN_repr	3.57	0.0127	grn (inferredBy_Orthology).	pnr; srp (inferredBy_MotifSimilarity).GATAd; GATAe; HLH3B (inferredBy_MotifSimilarity_n_Orthology).	282	4534	Abi;AcCoAS;Acph-1;Adh;Adhr;Aldh;alph;alpha-Est5;alpha-Est8;Amnionless;AnxB9;Arc1;Arpc2;aru;arx;ast;Atet;Atg17;Bacc;Best2;BicD;bmm;bru2;bur;bves;cg;CG10051;CG10337;CG10479;CG10527;CG10911;CG10960;CG11149;CG11151;CG11241;CG11317;CG11357;CG11737;CG11899;CG11912;CG12065;CG13102;CG13255;CG13325;CG13516;CG13654;CG14196;CG14245;CG14499;CG14502;CG14629;CG1468;CG14945;CG15093;CG15126;CG15210;CG15423;CG154…
swissregulon__sacCer__GLN3	3.56	0.0127	GATAd; GATAe; grn; pnr; srp (inferredBy_Orthology).		287	4941	Abi;AcCoAS;Adh;Adhr;Akt1;Aldh;alph;alpha-Est5;alpha-Est8;Amnionless;AnxB9;Arc1;Arpc2;aru;Atg17;atk;Bacc;bmm;bru2;bur;Cdc42;cert;cg;CG10051;CG10126;CG10208;CG10337;CG10479;CG10527;CG10911;CG10960;CG11149;CG11151;CG11241;CG11317;CG11594;CG11737;CG11912;CG12057;CG12065;CG13102;CG13255;CG13325;CG13516;CG13585;CG13654;CG14245;CG14499;CG14502;CG14629;CG14945;CG15093;CG15126;CG15210;CG15423;CG1544;CG155…
cisbp__M4274	3.54	0.0127		Clk (inferredBy_MotifSimilarity_n_Orthology).	14	143	bru2;CG10341;CG11089;CG11899;CG40485;CG6767;dar1;dl;LpR1;mod;Mys45A;nop5;RpL28;srp
predrem__nrMotif23	3.53	0.0126			10	77	CG33110;CG43658;dar1;Dtg;mbc;Ndae1;Oatp74D;pdm3;Pitslre;Snmp2
flyfactorsurvey__scrt_SOLEXA_2.5_1_FBgn0004880	3.53	0.0126	scrt (directAnnotation).	CG12605 (inferredBy_MotifSimilarity).	28	420	AstC;Best2;CG11089;CG1441;CG15093;CG16965;CG17574;CG42458;CG42807;CG5171;CG5909;CG7900;Chd64;CngA;Dbi;DIP-theta;Ect3;Etf-QO;fus;GILT1;HPS4;Hr39;klu;knrl;pdm3;rogdi;Tk;ttv
cisbp__M5362	3.52	0.0126		E2f2 (inferredBy_MotifSimilarity_n_Orthology).	9	73	Art1;BicD;CG42458;Dsp1;Elal;klu;REPTOR;Tl;ttv
flyfactorsurvey__srp_SANGER_5_FBgn0003507	3.5	0.0126	srp (directAnnotation).	GATAe; grn (inferredBy_MotifSimilarity).GATAd; pnr (inferredBy_MotifSimilarity_n_Orthology).	289	4882	Abi;AcCoAS;Akt1;Aldh;alph;alpha-Est5;alpha-Est8;Amnionless;AnxB9;Arpc2;aru;Atet;Atg17;atk;Bacc;BicD;bmm;bru2;bur;bves;CAHbeta;cg;CG10051;CG10337;CG10341;CG10479;CG10512;CG10527;CG10960;CG11151;CG11241;CG11317;CG11357;CG11594;CG11737;CG11912;CG12065;CG12811;CG13102;CG13255;CG13325;CG13397;CG13516;CG13654;CG13887;CG14196;CG14245;CG14499;CG14502;CG14629;CG1468;CG14945;CG15093;CG15126;CG15152;CG15210…
cisbp__M0239	3.5	0.0126		Clk (inferredBy_MotifSimilarity_n_Orthology).	13	146	CG10341;CG32344;CG3335;CG40485;dl;LpR1;mod;Mys45A;Nlp;nop5;Oatp74D;RpL28;srp
tfdimers__MD00021	3.49	0.0125	NFAT (inferredBy_Orthology).		8	53	CG10479;CG13318;CG15126;CG4297;daw;ImpL2;PGRP-LA;SNF4Agamma
cisbp__M0285	3.46	0.0125			11	98	AcCoAS;bru2;cg;CG40485;CG7724;CG9837;Dsp1;Lerp;MEP-1;Taldo;Tl
cisbp__M5479	3.45	0.0124	pnr (inferredBy_Orthology).	grn; srp (inferredBy_MotifSimilarity).GATAd; GATAe; HLH3B (inferredBy_MotifSimilarity_n_Orthology).	297	4745	Abi;AcCoAS;Acph-1;Adh;Adhr;Akt1;Aldh;alph;alpha-Est5;alpha-Est8;Amnionless;AnxB9;Arc1;ArgRS;Arpc2;aru;ast;Atet;Atg17;atk;Bacc;Best2;bmm;bru2;bur;bves;cg;CG10051;CG10337;CG10479;CG10512;CG10527;CG10911;CG10960;CG11149;CG11151;CG11241;CG11357;CG11594;CG11737;CG11912;CG12065;CG13102;CG13255;CG13325;CG13397;CG13516;CG13654;CG13887;CG14196;CG14245;CG14499;CG14502;CG14629;CG1468;CG14945;CG15093;CG15126…
cisbp__M5214	3.44	0.0124	srp (directAnnotation).	GATAe; grn (inferredBy_MotifSimilarity).GATAd; pnr (inferredBy_MotifSimilarity_n_Orthology).	287	4944	Abi;AcCoAS;Akt1;Aldh;alph;alpha-Est5;alpha-Est8;Amnionless;AnxB9;Arpc2;aru;Atet;Atg17;atk;Bacc;BicD;bmm;bru2;bur;bves;CAHbeta;Cdc42;cg;CG10051;CG10479;CG10512;CG10527;CG10960;CG11151;CG11241;CG11317;CG11357;CG11594;CG11737;CG11912;CG12065;CG12811;CG13102;CG13255;CG13325;CG13397;CG13516;CG13654;CG14196;CG14245;CG14499;CG14502;CG14629;CG1468;CG14688;CG14945;CG15093;CG15126;CG15152;CG15423;CG1544;CG…
cisbp__M4818	3.43	0.0124	CG12605 (directAnnotation).	Kah; scrt (inferredBy_MotifSimilarity).	29	472	AstC;Best2;CG11089;CG1441;CG15093;CG16965;CG30151;CG42458;CG42807;CG5171;CG5909;CG7900;Chd64;Dbi;DIP-theta;Ect3;Etf-QO;fus;HPS4;Hr39;klu;knrl;loco;Lrt;pdm3;rogdi;Tk;Tsp42Ee;ttv
hdpi__CREB1	3.43	0.0124	CrebB (inferredBy_Orthology).		102	1952	Abi;Ada;Akt1;Amnionless;AnxB9;ast;Atg3;Atg9;Bacc;bru2;CG10103;CG10663;CG10960;CG11168;CG11317;CG12065;CG12163;CG13887;CG14502;CG16965;CG17333;CG17549;CG2909;CG30357;CG31145;CG34284;CG43658;CG5946;CG5953;CG6084;CG6175;CG6330;CG6767;CG6805;CG6910;CG7724;CG8468;CG9498;CG9945;CngA;CPT2;crp;cv-d;Cyp12b2;Dad;dar1;daw;DIP-theta;dl;dsx;Flo1;fus;Gip;Gk2;glec;GLS;Gnmt;Got1;Hr39;ImpL2;klu;knrl;Lerp;loco;LpR…
cisbp__M5478	3.43	0.0124	pnr (inferredBy_Orthology).	grn; srp (inferredBy_MotifSimilarity).CycT; GATAd; GATAe; HLH3B; Sirt6 (inferredBy_MotifSimilarity_n_Orthology).	280	4428	Abi;AcCoAS;Acph-1;Adh;Adhr;Akt1;Aldh;alph;alpha-Est5;alpha-Est8;Amnionless;AnxB9;Arpc2;aru;ast;Atet;Atg17;Bacc;Best2;bmm;bru2;bur;cg;CG10051;CG10337;CG10479;CG10527;CG10911;CG10960;CG11149;CG11151;CG11241;CG11357;CG11594;CG11737;CG11912;CG12065;CG13102;CG13255;CG13325;CG13516;CG13654;CG13887;CG14196;CG14245;CG14499;CG14502;CG14629;CG1468;CG14945;CG15093;CG15126;CG15152;CG15210;CG15423;CG1544;CG15…
transfac_pro__M07321	3.41	0.0124	Hnf4 (inferredBy_Orthology).	usp (inferredBy_MotifSimilarity).EcR; Hr78; svp (inferredBy_MotifSimilarity_n_Orthology).	151	2992	AcCoAS;Adh;Adhr;Aldh;alph;Amnionless;Arc42;AstC;Atet;Atg9;atk;bru2;CG10126;CG10237;CG10960;CG10962;CG11151;CG11317;CG11357;CG13325;CG13516;CG14502;CG15093;CG15126;CG15553;CG1673;CG16965;CG17597;CG2865;CG31145;CG31267;CG31324;CG31522;CG3164;CG31694;CG32054;CG32195;CG32795;CG33110;CG34284;CG40485;CG42458;CG43222;CG43658;CG4408;CG44837;CG5510;CG5590;CG5958;CG5999;CG6175;CG6287;CG6330;CG6726;CG7376;C…
yetfasco__YCR039C_1364	3.4	0.0123			11	117	cg;CG42458;CG43658;CG6951;CG9921;Cyp1;Dsp1;HPS4;MEP-1;pdm3;Taldo
taipale__GATA3_full_AGATAANN	3.39	0.0123	grn (inferredBy_Orthology).	pnr; srp (inferredBy_MotifSimilarity).CycT; GATAd; GATAe; HLH3B; Sirt6 (inferredBy_MotifSimilarity_n_Orthology).	249	3734	Abi;AcCoAS;Aldh;alph;alpha-Est5;alpha-Est8;Amnionless;AnxB9;Arpc2;aru;Atet;Atg17;Bacc;bru2;bur;cg;CG10051;CG10337;CG10479;CG10527;CG10911;CG10960;CG11149;CG11151;CG11241;CG11317;CG11357;CG11737;CG11912;CG12065;CG13102;CG13255;CG13325;CG13516;CG14245;CG14499;CG14502;CG14629;CG1468;CG14945;CG15093;CG15126;CG15152;CG15423;CG1544;CG15553;CG16775;CG17019;CG17574;CG17597;CG17660;CG18473;CG1941;CG2187;C…
taipale__HNF4A_full_RRGTCCAAAGGTCAA	3.39	0.0123	Hnf4 (inferredBy_Orthology).	Hr78; svp; usp (inferredBy_MotifSimilarity_n_Orthology).	129	2331	AcCoAS;Adh;Adhr;Aldh;alpha-Est8;Arc42;Atet;atk;bru2;bves;CG10126;CG10237;CG10479;CG10663;CG11151;CG11317;CG11357;CG13516;CG13618;CG15553;CG15771;CG17019;CG17292;CG17597;CG2865;CG30010;CG31145;CG31324;CG3164;CG31694;CG32195;CG32795;CG33110;CG3663;CG42240;CG42458;CG43222;CG43658;CG44837;CG4822;CG5590;CG5707;CG5966;CG6330;CG6660;CG6726;CG6910;CG7457;CG7724;CG8036;CG8468;CG8679;CG8814;CG9664;CG9815;c…
yetfasco__YDR123C_713	3.38	0.0123			10	85	CG44837;CG8539;cic;dar1;Hr39;Idh;knrl;Pak3;Pli;REPTOR
factorbook__GATA1-ext	3.34	0.0122	grn (inferredBy_Orthology).	CycT; HLH3B; pnr (inferredBy_MotifSimilarity_n_Orthology).	260	4948	Abi;AcCoAS;Ada;Akt1;Aldh;alph;alpha-Est8;Amnionless;AnxB9;ArgRS;AstC;Atg17;Atg3;atk;Bacc;Best2;BicD;bmm;bru2;bves;CAHbeta;Cdc42;cert;cg;CG10126;CG10337;CG10479;CG10512;CG10527;CG10960;CG11151;CG11317;CG11594;CG11737;CG11912;CG12057;CG12065;CG13102;CG13255;CG13325;CG13516;CG13654;CG14245;CG1441;CG14499;CG14502;CG14629;CG14688;CG14945;CG15093;CG15126;CG15152;CG15210;CG1544;CG15579;CG16727;CG17549;C…
cisbp__M1387	3.34	0.0122			37	639	Atet;Bacc;Best2;bru2;CG10960;CG11399;CG13102;CG15553;CG15771;CG32647;CG44837;CG5953;CG6175;CG6685;CG9837;CG9921;Chd64;cic;cpb;dar1;Def;Etf-QO;Hip14;l(1)G0469;Lerp;Mdh1;MEP-1;Oatp74D;pdm3;Pex14;Pms2;Proc;Rala;REPTOR;srp;Taldo;Tl
predrem__nrMotif1646	3.32	0.0121			148	3108	5PtaseI;AcCoAS;Ada;Akt1;alph;alpha-Est8;AnxB9;Arpc2;Atet;Atg3;Bacc;bbc;bmm;bur;cert;cg;CG10237;CG10663;CG11089;CG11357;CG12012;CG12065;CG12105;CG12163;CG13255;CG13325;CG13397;CG13585;CG13654;CG13865;CG14688;CG15083;CG15093;CG1572;CG15771;CG16727;CG17019;CG17574;CG17778;CG17896;CG2865;CG30371;CG3077;CG31145;CG31156;CG31324;CG3164;CG31694;CG32549;CG32795;CG3630;CG4038;CG42240;CG42458;CG4297;CG43055…
cisbp__M0635	3.31	0.0121			10	90	Bacc;cg;CG7724;CG8468;CG9921;cpb;Dsp1;Hip14;MEP-1;Taldo
scertf__pachkov.INO4	3.3	0.0121			12	138	CG15093;CG31145;CG44837;CG7724;CG8539;Chd64;cic;dar1;Idh;knrl;LpR1;NPF
transfac_pro__M02868	3.3	0.0121	Hnf4 (inferredBy_Orthology).		35	506	Abi;Arc42;bmm;CG31145;CG31267;CG31694;CG3690;CG5590;CG5958;CG6767;CG8814;CPT2;dar1;daw;Dtg;Etf-QO;Fem-1;fus;GLS;Hip14;HPS4;Irp-1B;klu;knrl;LpR1;Lsd-2;Mtpalpha;Obp56d;PCB;pdgy;PMP34;SNF4Agamma;spz;ttv;whd
taipale__GATA4_DBD_AGATAANN	3.28	0.012	pnr (inferredBy_Orthology).	grn; srp (inferredBy_MotifSimilarity).CycT; GATAd; GATAe; HLH3B; Sirt6 (inferredBy_MotifSimilarity_n_Orthology).	280	4350	Abi;AcCoAS;Acph-1;Adh;Adhr;Akt1;Aldh;alph;alpha-Est5;alpha-Est8;Amnionless;AnxB9;Arpc2;aru;ast;Atet;Atg17;Bacc;Best2;bmm;bru2;bur;cg;CG10051;CG10337;CG10479;CG10527;CG10911;CG10960;CG11149;CG11151;CG11241;CG11357;CG11594;CG11737;CG11912;CG12065;CG13102;CG13255;CG13325;CG13516;CG13654;CG13887;CG14196;CG14245;CG14499;CG14502;CG14629;CG1468;CG14945;CG15093;CG15126;CG15152;CG15210;CG15423;CG1544;CG15…
cisbp__M5183	3.27	0.012	scrt (directAnnotation).	CG12605 (inferredBy_MotifSimilarity).	26	399	AstC;Best2;CG11089;CG1441;CG15093;CG16965;CG17574;CG42458;CG42807;CG5171;CG7900;Chd64;CngA;Dbi;DIP-theta;Ect3;Etf-QO;fus;HPS4;Hr39;klu;knrl;pdm3;rogdi;Tk;ttv
jaspar__MA1068.1	3.26	0.012		Xbp1 (inferredBy_MotifSimilarity_n_Orthology).	141	3034	Abi;Ada;Akt1;Aldh;ALiX;alph;AnxB9;Arpc2;ast;Atg17;bbc;bru2;cg;CG10103;CG10337;CG10479;CG10512;CG10960;CG10962;CG11399;CG12065;CG12163;CG13177;CG13585;CG13887;CG14245;CG1441;CG14502;CG15083;CG15093;CG1572;CG16965;CG17574;CG2818;CG2865;CG30357;CG31145;CG31324;CG3149;CG32549;CG33054;CG33110;CG3408;CG40485;CG42458;CG42542;CG4297;CG43658;CG4660;CG5946;CG5953;CG6023;CG6084;CG6175;CG6330;CG6660;CG6767;C…
transfac_pro__M01621	3.26	0.012			21	311	CG10479;CG31145;CG4552;CG6726;Dr;Dsp1;dsx;Dtg;Ect3;imd;klu;Lerp;Oatp74D;pdm3;Pli;REPTOR;RpS11;Tab2;Tk;Tl;tok
jaspar__MA0385.1	3.26	0.012			14	164	CG31145;CG4552;CG6726;Dr;dsx;Dtg;klu;Oatp74D;pdm3;REPTOR;RpS11;Tab2;Tl;tok
flyfactorsurvey__grh_FlyReg_FBgn0259211	3.26	0.012	grh (directAnnotation).		12	119	CG13325;CG31694;CG3829;CG7724;cic;emp;lama;Oatp74D;pdm3;REPTOR;Tl;ttv
cisbp__M4714	3.24	0.012			203	3118	Abi;AcCoAS;alph;alpha-Est5;alpha-Est8;Amnionless;Arpc2;Atet;Atg17;bmm;bru2;bur;cg;CG10126;CG10479;CG10527;CG10960;CG11149;CG11241;CG11317;CG11357;CG11737;CG11912;CG12065;CG12811;CG13255;CG13325;CG13618;CG13654;CG14499;CG14502;CG14945;CG15093;CG15152;CG15423;CG1544;CG16727;CG16775;CG16965;CG17549;CG17574;CG17660;CG18249;CG18473;CG1941;CG30010;CG30371;CG30423;CG31075;CG31145;CG31156;CG31267;CG31522…
cisbp__M5477	3.24	0.012	grn (inferredBy_Orthology).	pnr; srp (inferredBy_MotifSimilarity).CycT; GATAd; GATAe; HLH3B; Sirt6 (inferredBy_MotifSimilarity_n_Orthology).	245	3692	Abi;AcCoAS;Aldh;alph;alpha-Est5;alpha-Est8;Amnionless;AnxB9;Arpc2;Atet;Atg17;Bacc;bru2;bur;cg;CG10051;CG10337;CG10479;CG10527;CG10911;CG10960;CG11149;CG11151;CG11241;CG11317;CG11357;CG11737;CG11912;CG12065;CG13102;CG13255;CG13325;CG13516;CG14245;CG14499;CG14502;CG14629;CG1468;CG14945;CG15093;CG15126;CG15152;CG15423;CG1544;CG15553;CG16775;CG17019;CG17574;CG17597;CG17660;CG18473;CG1941;CG2187;CG300…
taipale__GATA5_DBD_AGATAANN	3.24	0.0119	pnr (inferredBy_Orthology).	grn; srp (inferredBy_MotifSimilarity).GATAd; GATAe; HLH3B (inferredBy_MotifSimilarity_n_Orthology).	298	4760	Abi;AcCoAS;Acph-1;Adh;Adhr;Akt1;Aldh;alph;alpha-Est5;alpha-Est8;Amnionless;AnxB9;Arc1;ArgRS;Arpc2;aru;ast;Atet;Atg17;atk;Bacc;Best2;bmm;bru2;bur;bves;cg;CG10051;CG10337;CG10479;CG10512;CG10527;CG10911;CG10960;CG11149;CG11151;CG11241;CG11357;CG11594;CG11737;CG11912;CG12065;CG13102;CG13255;CG13325;CG13397;CG13516;CG13654;CG13887;CG14196;CG14245;CG14499;CG14502;CG14629;CG1468;CG14945;CG15093;CG15126…
taipale_tf_pairs__GATA1_AGATAAN_HT	3.24	0.0119	grn (inferredBy_Orthology).		291	4940	Abi;AcCoAS;Adh;Adhr;Akt1;Aldh;alph;alpha-Est5;alpha-Est8;Amnionless;AnxB9;Arpc2;aru;Atg17;atk;Bacc;bmm;bru2;bur;bves;cg;CG10051;CG10126;CG10337;CG10479;CG10512;CG10527;CG10911;CG10960;CG11151;CG11241;CG11317;CG11399;CG11737;CG11912;CG12065;CG13102;CG13255;CG13325;CG13516;CG13618;CG13654;CG13887;CG14196;CG14245;CG14435;CG14499;CG14502;CG14629;CG1468;CG14688;CG14945;CG15093;CG15126;CG15210;CG15423;…
cisbp__M0786	3.22	0.0119		pnr (inferredBy_MotifSimilarity_n_Orthology).	273	4823	Abi;AcCoAS;Akt1;Aldh;alph;alpha-Est8;Amnionless;Arpc2;aru;ast;Atet;Atg17;Bacc;Best2;bmm;bru2;bur;bves;CAHbeta;cert;cg;CG10126;CG10237;CG10479;CG10512;CG10527;CG10911;CG10960;CG10962;CG11149;CG11241;CG11317;CG11594;CG11737;CG11899;CG11912;CG12065;CG12730;CG13255;CG13325;CG13585;CG13618;CG13654;CG14435;CG14499;CG14502;CG14688;CG15093;CG15126;CG15152;CG1544;CG15579;CG1572;CG16727;CG16775;CG16965;CG1…
cisbp__M0682	3.21	0.0119			46	688	Ada;Akt1;Bacc;cg;CG10960;CG11399;CG13397;CG1910;CG2865;CG31522;CG43055;CG44837;CG4552;CG6726;CG6951;CG7724;CG9837;CG9921;Chd64;cic;cpb;Cyp1;DIP-theta;Dsp1;dsx;Etf-QO;glec;HPS4;klu;Lerp;LpR1;MEP-1;msn;Oatp74D;Pak3;pdm3;PGRP-LA;Pitslre;Pp1alpha-96A;rogdi;srp;Syx7;Taldo;Tl;tok;ttv
hocomoco__TAL1_HUMAN.H10MO.A	3.2	0.0119	HLH3B (inferredBy_Orthology).	CycT; grn; pnr (inferredBy_MotifSimilarity_n_Orthology).	229	4222	Abi;AcCoAS;Ada;Akt1;Aldh;alph;alpha-Est8;Amnionless;AnxB9;ArgRS;Atg17;Atg3;atk;Bacc;Best2;BicD;bmm;bru2;bur;CAHbeta;Cdc42;cert;cg;CG10126;CG10337;CG10479;CG10960;CG11151;CG11317;CG11737;CG11912;CG12065;CG13102;CG13325;CG13516;CG13618;CG14499;CG14629;CG14688;CG14945;CG15093;CG15126;CG15152;CG15210;CG1544;CG16727;CG16965;CG17549;CG18095;CG18249;CG18473;CG1941;CG2187;CG2493;CG30010;CG30151;CG30371;C…
cisbp__M0275	3.2	0.0119		Atf-2; Atf3; Atf6; CG44247; CrebA; Jra; crc; kay (inferredBy_MotifSimilarity).CrebB; Xbp1 (inferredBy_MotifSimilarity_n_Orthology).	50	853	Abi;ALiX;AnxB9;ast;CG10103;CG10337;CG10960;CG13177;CG13887;CG16965;CG30357;CG5946;CG6084;CG6767;CG9498;crp;dar1;daw;DIP-theta;Flo1;Gk2;GLS;Hr39;ImpL2;klu;knrl;loco;LpR1;Lrt;mthl5;Nplp1;path;pdm3;Proc;Rala;REPTOR;Rm62;rogdi;Rox8;Sec61beta;spin;srp;Syb;Tab2;Tep4;Tl;ttv;Vps60;whd;wun
elemento__AAGCTGG	3.2	0.0119			9	66	CG31145;CG3829;CG5510;CG6726;DIP-theta;emp;Lerp;LpR1;PGRP-LA
cisbp__M4010	3.19	0.0118	Tbp (inferredBy_Orthology).	RpII215; Taf1 (inferredBy_MotifSimilarity_n_Orthology).	9	68	Ada;AstC;CG5171;CG7724;CG8468;CG8997;crp;REPTOR;vvl
elemento__CCTTATC	3.18	0.0118			242	4997	Abi;AcCoAS;Ada;Akt1;Aldh;alph;alpha-Est5;Amnionless;AnxB9;ArgRS;Arpc2;aru;AstC;Atg17;Bacc;Best2;BicD;bmm;bru2;bur;bves;CG10337;CG10341;CG10479;CG10512;CG10527;CG10960;CG10962;CG11151;CG11737;CG11899;CG11912;CG12057;CG12065;CG12163;CG13102;CG13255;CG13325;CG13654;CG14245;CG14499;CG14502;CG14945;CG15093;CG15126;CG15423;CG1544;CG15553;CG16775;CG17549;CG17574;CG17660;CG18095;CG18473;CG1941;CG2187;CG3…
cisbp__M0681	3.17	0.0118			57	960	Akt1;AstC;Atet;Bacc;Best2;bru2;cg;CG10960;CG13397;CG1910;CG2865;CG31522;CG3588;CG3829;CG43658;CG44837;CG5953;CG6685;CG6726;CG6951;CG7724;CG8468;CG9837;CG9921;cic;cpb;Cyp1;Cyp12b2;dar1;Def;Dr;Dsp1;dsx;emp;Etf-QO;glec;grk;Hr39;ImpL2;l(1)G0469;Lerp;Lrch;MEP-1;msn;Mvb12;Oatp74D;Pli;Proc;qin;SNF4Agamma;srp;Taldo;Tl;tok;ttv;Wnt2;wun
cisbp__M3414	3.17	0.0118	Hnf4 (inferredBy_Orthology).	usp (inferredBy_MotifSimilarity).EcR; Hr51; Hr78; svp (inferredBy_MotifSimilarity_n_Orthology).	116	2311	AcCoAS;Adh;Adhr;Aldh;alph;Amnionless;Arc42;Arpc2;Atet;atk;bbc;bru2;CG10126;CG11151;CG11317;CG11357;CG12065;CG12163;CG13325;CG13516;CG13618;CG15553;CG17597;CG31145;CG31267;CG31324;CG31522;CG3164;CG31694;CG32647;CG33110;CG34284;CG3663;CG42240;CG42458;CG43222;CG43658;CG4408;CG44837;CG5171;CG5590;CG5707;CG5958;CG6175;CG6287;CG6726;CG7457;CG7724;CG8814;CG9815;Cpr67Fb;CPT2;Cyp4d20;Cyp4p1;daw;Dbi;DIP-th…
transfac_pro__M05841	3.17	0.0118			229	4889	AcCoAS;Aldh;ALiX;alph;alpha-Est5;Arc42;arx;ast;Atet;Bacc;bbc;Best2;BicD;bmm;bru2;bur;bves;CAHbeta;Cdc42;cert;cg;CG10053;CG10237;CG10479;CG10638;CG10663;CG10911;CG10960;CG11357;CG11737;CG12065;CG12105;CG12163;CG13255;CG13325;CG13516;CG13618;CG13654;CG1441;CG14435;CG14445;CG14945;CG15083;CG15093;CG15210;CG15579;CG15771;CG16727;CG1673;CG16965;CG17168;CG17486;CG17778;CG17896;CG18609;CG1910;CG2187;CG2…
cisbp__M0798	3.16	0.0118	GATAd; GATAe; grn; pnr; srp (inferredBy_Orthology).		276	4989	Abi;AcCoAS;agt;Akt1;Aldh;alph;alpha-Est5;alpha-Est8;Amnionless;Arc1;Arpc2;arx;AstC;Atet;Atg17;Bacc;Best2;bru2;bur;bves;cg;CG10051;CG10208;CG10337;CG10479;CG10911;CG10960;CG11149;CG11151;CG11241;CG11317;CG11357;CG11399;CG11737;CG11899;CG11912;CG12012;CG12057;CG12065;CG12096;CG13102;CG13255;CG13325;CG13397;CG13516;CG14245;CG14435;CG14499;CG14502;CG14629;CG1468;CG14945;CG15093;CG15126;CG15210;CG1542…
transfac_pro__M01031	3.15	0.0117	Hnf4 (inferredBy_Orthology).	usp (inferredBy_MotifSimilarity).EcR; Hr51; Hr78; svp (inferredBy_MotifSimilarity_n_Orthology).	102	1957	Adh;Adhr;Aldh;alph;Arc42;Atet;atk;bru2;CG10126;CG11151;CG11317;CG11357;CG13516;CG15093;CG15553;CG31145;CG31267;CG31522;CG3164;CG31694;CG32195;CG32647;CG32795;CG33110;CG40485;CG42458;CG43222;CG43658;CG44837;CG5590;CG5958;CG6287;CG6330;CG6726;CG7457;CG7724;CG8036;CG8814;CG9815;cic;cindr;CngA;CPT2;crp;Cyp4d20;daw;Dbi;DIP-theta;Dr;Ect3;emp;Etf-QO;Fem-1;Fim;fus;Gk1;Gk2;Hr39;Hug;Idh;ImpL2;Indy;klu;knrl…
predrem__nrMotif157	3.15	0.0117		CTCF; SMC3 (inferredBy_MotifSimilarity_n_Orthology).	8	57	alph;CG16965;CG3999;dar1;DIP-theta;klu;Sardh;Tl
cisbp__M4621	3.15	0.0117	grn (inferredBy_Orthology).	CycT; HLH3B; pnr (inferredBy_MotifSimilarity_n_Orthology).	245	4602	Abi;AcCoAS;Ada;Akt1;Aldh;alph;alpha-Est5;alpha-Est8;Amnionless;AnxB9;ArgRS;Arpc2;aru;AstC;Atg17;Atg3;atk;Bacc;Best2;bmm;bru2;bves;CAHbeta;Cdc42;cert;cg;CG10126;CG10337;CG10479;CG10960;CG11151;CG11317;CG11357;CG11737;CG11912;CG12065;CG13085;CG13102;CG13325;CG13516;CG13618;CG14245;CG1441;CG14435;CG14499;CG14629;CG14688;CG14945;CG15093;CG15126;CG15152;CG15210;CG1544;CG16727;CG16965;CG17549;CG17574;C…
transfac_pro__M07857	3.15	0.0117	BtbVII (directAnnotation).		182	3740	5PtaseI;Abi;AcCoAS;Adh;Adhr;Akt1;alph;alpha-Est8;Arpc2;Art1;aru;AstC;Atet;Atg10;Atg17;Bacc;BicD;bmm;bru2;bur;bves;cert;cg;CG10237;CG10479;CG10960;CG11241;CG11399;CG11899;CG12065;CG13397;CG13585;CG14688;CG15083;CG15210;CG1572;CG16727;CG16965;CG17019;CG17549;CG17778;CG17896;CG18095;CG18249;CG18258;CG2865;CG30151;CG31145;CG31156;CG31522;CG3164;CG31694;CG32195;CG32549;CG3630;CG3690;CG42240;CG42458;CG…
jaspar__MA0108.2	3.13	0.0117		Tbp (inferredBy_MotifSimilarity).RpII215; Taf1 (inferredBy_MotifSimilarity_n_Orthology).	9	73	Ada;AstC;CG5171;CG7724;CG8468;CG8997;crp;REPTOR;vvl
transfac_public__M00247	3.12	0.0117			9	68	CG11399;CG31145;Hip14;klu;knrl;Lerp;loco;pdm3;Pex14
stark__CACNNRNNNNNNCAC	3.12	0.0117			9	72	Akt1;CG42458;CG6767;fus;HPS4;klu;Oatp74D;Pak3;pdm3
transfac_pro__M00789	3.11	0.0116	grn; pnr (inferredBy_Orthology).		248	4130	AcCoAS;Adh;Adhr;Akt1;Aldh;alph;alpha-Est5;alpha-Est8;Amnionless;AnxB9;Arpc2;aru;Atet;Atg17;Bacc;Best2;BicD;bru2;bur;bves;cg;CG10126;CG10337;CG10479;CG10527;CG10911;CG10960;CG10962;CG11149;CG11151;CG11241;CG11357;CG11737;CG11899;CG11912;CG12065;CG13102;CG13255;CG13325;CG13516;CG13618;CG14245;CG14435;CG14499;CG14629;CG14688;CG14945;CG15093;CG15126;CG15210;CG15423;CG1544;CG15553;CG15579;CG1572;CG167…
cisbp__M0083	3.1	0.0116	TfAP-2 (inferredBy_Orthology).		21	286	bru2;CG10479;CG12065;CG14502;CG31145;CG42329;CG42458;CG4267;CG43055;CG44837;CG5999;CG7724;dar1;Ect3;klu;Lpin;REPTOR;RhoGAP68F;srp;Tk;Tl
flyfactorsurvey__pnr_SANGER_5_FBgn0003117	3.1	0.0116	pnr (directAnnotation).		268	4894	Abi;AcCoAS;Ada;Adh;Adhr;Aldh;alph;alpha-Est5;alpha-Est8;Amnionless;AnxB9;Arpc2;aru;AstC;Atg17;Bacc;Best2;bru2;bur;Cdc42;cg;CG10126;CG10237;CG10337;CG10479;CG10512;CG10527;CG10960;CG10962;CG11241;CG11317;CG11357;CG11399;CG11594;CG11737;CG11899;CG12065;CG12730;CG13102;CG13255;CG13325;CG13516;CG13585;CG14245;CG14435;CG14499;CG14629;CG14688;CG15093;CG15126;CG15152;CG1544;CG15553;CG15771;CG16727;CG167…
cisbp__M4775	3.1	0.0116		br (inferredBy_MotifSimilarity).	214	4375	AcCoAS;Akt1;Aldh;alph;Arpc2;Atet;Atg3;atk;Best2;BicD;bmm;bru2;bves;CAHbeta;CG10051;CG10126;CG10237;CG10479;CG10911;CG10960;CG11151;CG11317;CG11357;CG11594;CG11737;CG11843;CG11899;CG12065;CG12730;CG13177;CG13255;CG13325;CG14502;CG14945;CG15126;CG15210;CG1544;CG15771;CG16727;CG16775;CG16904;CG16965;CG17549;CG17574;CG17896;CG18473;CG2865;CG2909;CG30371;CG31145;CG31324;CG31522;CG31694;CG32379;CG32549…
transfac_pro__M02220	3.08	0.0116	Hnf4 (inferredBy_Orthology).	usp (inferredBy_MotifSimilarity).ERR; EcR; Hr51; Hr78; svp (inferredBy_MotifSimilarity_n_Orthology).	78	1356	Adh;Adhr;Aldh;alph;Arc42;Atet;CG10126;CG11151;CG11317;CG11357;CG15553;CG31145;CG31267;CG31522;CG3164;CG31694;CG32795;CG33110;CG43222;CG43658;CG5590;CG5958;CG6726;CG7457;CG7724;CG8036;CG8814;CG9664;CG9815;cic;CngA;CPT2;Cyp4d20;daw;DIP-theta;Ect3;emp;Etf-QO;Fem-1;fus;Gk2;Hr39;Hug;Idh;ImpL2;Indy;Irp-1B;klu;knrl;l(1)G0193;Lpin;LpR1;Lrt;Lsd-2;MEP-1;moody;msn;Mtpalpha;Obp18a;Obp56d;p38a;Pak3;pdgy;Pli;q…
cisbp__M1864	3.07	0.0116	croc (inferredBy_Orthology).		17	247	Ada;alph;bru2;cg;CG7724;CG9837;CG9921;cic;crp;Cyp1;Dad;Dsp1;dsx;glec;Hip14;MEP-1;Taldo
flyfactorsurvey__nub_FlyReg_FBgn0085424	3.07	0.0116	nub (directAnnotation).		11	121	cg;CG4552;Chd64;cpb;Dr;Dsp1;dsx;Hr39;MEP-1;pdm3;tok
elemento__CACCTGG	3.07	0.0115			10	86	alph;CG31145;CG42458;dar1;DIP-theta;Oatp74D;pdm3;Sardh;SNF4Agamma;Tl
cisbp__M3320	3.07	0.0115	grn (inferredBy_Orthology).	pnr (inferredBy_MotifSimilarity).GATAd; GATAe; srp (inferredBy_MotifSimilarity_n_Orthology).	270	4688	Abi;AcCoAS;Adh;Adhr;agt;Aldh;alph;alpha-Est5;alpha-Est8;Amnionless;AnxB9;Arpc2;aru;Atet;Atg17;atk;bbc;Best2;bru2;bur;bves;cert;cg;CG10051;CG10337;CG10479;CG10512;CG10527;CG10911;CG10960;CG11151;CG11241;CG11317;CG11737;CG11912;CG12065;CG13102;CG13255;CG13325;CG13397;CG13618;CG13654;CG14245;CG14435;CG14499;CG14502;CG14629;CG14688;CG14945;CG15093;CG15126;CG15152;CG15423;CG1544;CG15553;CG1673;CG16775…
transfac_pro__M01340	3.07	0.0115			11	121	CG14629;CG42458;CG4267;CG44837;CG5510;Cyp4d20;Lerp;msn;pdm3;ttv;UK114
flyfactorsurvey__br_SOLEXA_10_FBgn0000210	3.05	0.0115	br (directAnnotation).		218	4388	AcCoAS;Akt1;Aldh;alph;Amnionless;Arpc2;Atet;Atg3;atk;Best2;BicD;bmm;bru2;bves;CAHbeta;cg;CG10051;CG10126;CG10237;CG10479;CG10911;CG10960;CG11151;CG11317;CG11357;CG11594;CG11737;CG11843;CG11899;CG12065;CG12730;CG13177;CG13255;CG13325;CG14502;CG14945;CG15126;CG15210;CG15771;CG16727;CG16775;CG16904;CG16965;CG17549;CG17574;CG17896;CG18473;CG2865;CG2909;CG30371;CG31145;CG31324;CG31522;CG31694;CG32379;…
neph__UW.Motif.0088	3.05	0.0115		Chrac-14; Nf-YB (inferredBy_MotifSimilarity_n_Orthology).	8	43	cic;CngA;dar1;Dr;Idh;pdm3;spin;ttv
transfac_pro__M01186	3.05	0.0115		Atf3; CrebA; Jra; kay (inferredBy_MotifSimilarity).CrebB; Xbp1 (inferredBy_MotifSimilarity_n_Orthology).	150	3162	Abi;AcCoAS;Ada;Akt1;Aldh;ALiX;alph;AnxB9;ast;Atg17;bbc;Best2;BicD;bru2;cg;CG10103;CG10337;CG10512;CG10663;CG10960;CG10962;CG11399;CG12065;CG12163;CG13177;CG13325;CG13516;CG13585;CG13887;CG14245;CG1441;CG14502;CG15083;CG1544;CG1572;CG16965;CG17292;CG17574;CG2818;CG30357;CG30423;CG31145;CG31267;CG31522;CG32549;CG33054;CG3408;CG34284;CG3630;CG3702;CG4038;CG42458;CG43658;CG44837;CG4552;CG4660;CG5510;…
swissregulon__sacCer__INO2	3.04	0.0115			4	11	CG44837;dar1;Idh;knrl
cisbp__M4988	3.03	0.0115	grh (directAnnotation).		8	57	CG13325;CG3829;CG7724;cic;emp;lama;pdm3;Tl
cisbp__M5106	3.02	0.0114	Met (directAnnotation).	Clk (inferredBy_MotifSimilarity_n_Orthology).	65	1174	Atg17;bru2;bur;CG10126;CG10341;CG10479;CG11089;CG11317;CG11899;CG13325;CG14502;CG14688;CG17574;CG31145;CG31324;CG31694;CG32344;CG32647;CG3335;CG40485;CG43658;CG5510;CG6175;CG6767;CG7724;CG8036;CG9815;CG9837;CG9921;CngA;crp;Cyp1;dar1;DIP-theta;dl;Dp;dsx;Fem-1;GLS;Hip14;Hug;lama;Letm1;LpR1;MFS9;mod;msn;Mys45A;Nlp;nop5;Nopp140;Oatp74D;Obp56d;olf186-M;Pdi;pdm3;REPTOR;RpL28;RpS5a;RpS7;SNF4Agamma;SP263…
transfac_pro__M04784	3	0.0114	Myc (inferredBy_Orthology).		16	208	Akt1;atk;CAHbeta;CG11089;CG13325;CG15093;CG1673;CG5953;CG6175;daw;ImpL2;knrl;LpR1;nop5;path;REPTOR

## Sheet: male-spec. dn CRE enrichment
motif	NES	AUC	TF_highConf	TF_lowConf	nEnrGenes	rankAtMax	enrichedGenes
cisbp__M0437	5.42	0.0281	CG16779 (inferredBy_Orthology).		286	4206	a;Ace;Act87E;Akap200;Appl;apt;aralar1;Asph;Asx;bab2;beat-IIIc;brat;C3G;CadN;Camta;CanA1;Ccs;Cda4;CG10132;CG10384;CG10492;CG10505;CG10513;CG10600;CG11000;CG11760;CG11883;CG12038;CG12325;CG12605;CG13003;CG1316;CG13575;CG13685;CG14186;CG14246;CG14621;CG14669;CG15021;CG15073;CG15080;CG15270;CG15365;CG15744;CG1648;CG16711;CG16779;CG17816;CG18641;CG1946;CG2225;CG2258;CG2617;CG30122;CG3078;CG31760;CG319…
c2h2_zfs__M0415	5.41	0.0281	CG16779 (inferredBy_Orthology).		298	4455	a;Ace;Act87E;Akap200;Appl;apt;aralar1;Asph;Asx;bab2;be;beat-IIIb;beat-IIIc;brat;Bsg25D;C3G;CaBP1;CadN;Camta;CanA1;Ccs;Cda4;CG10132;CG10384;CG10492;CG10505;CG10513;CG10600;CG11000;CG11760;CG11883;CG12038;CG12325;CG12605;CG13003;CG1316;CG13575;CG13685;CG14186;CG14246;CG14621;CG14669;CG15021;CG15073;CG15080;CG15270;CG15365;CG15661;CG15744;CG1648;CG16711;CG16779;CG17816;CG18641;CG1946;CG2225;CG2258;C…
yetfasco__YER068W_556	5.38	0.0279	Cnot4 (inferredBy_Orthology).		305	4669	a;Ace;Act87E;Akap200;AOX1;Appl;apt;aralar1;Asph;Asx;Atf-2;Atg4b;bab2;beat-IIIb;beat-IIIc;brat;Bsg25D;C3G;CaBP1;CadN;Camta;CanA1;Ccs;Cda4;CG10359;CG10384;CG10431;CG10492;CG10505;CG10513;CG10600;CG11000;CG11760;CG11883;CG12038;CG12325;CG12605;CG13003;CG1316;CG13575;CG13606;CG13685;CG14186;CG14621;CG14669;CG15021;CG15073;CG15080;CG15270;CG15365;CG15744;CG1648;CG16711;CG16779;CG17816;CG18641;CG1946;C…
jaspar__MA0379.1	5.35	0.0279	Cnot4 (inferredBy_Orthology).		294	4395	a;Ace;Act87E;AOX1;Appl;apt;aralar1;Asph;Asx;Atf-2;Atg4b;bab2;beat-IIIb;beat-IIIc;brat;Bsg25D;C3G;CaBP1;CadN;Camta;CanA1;Ccs;Cda4;CG10359;CG10384;CG10492;CG10505;CG10513;CG10600;CG11000;CG11760;CG11883;CG12038;CG12325;CG12605;CG13003;CG1316;CG13575;CG13606;CG13685;CG14186;CG14621;CG14669;CG15021;CG15073;CG15080;CG15270;CG15365;CG15744;CG1648;CG16711;CG16779;CG17816;CG18641;CG1946;CG2225;CG2617;CG2…
transfac_pro__M01631	5.34	0.0278	Cnot4 (inferredBy_Orthology).		294	4396	a;Ace;Act87E;AOX1;Appl;apt;aralar1;Asph;Asx;Atf-2;Atg4b;bab2;beat-IIIb;beat-IIIc;brat;Bsg25D;C3G;CaBP1;CadN;Camta;CanA1;Ccs;Cda4;CG10359;CG10384;CG10492;CG10505;CG10513;CG10600;CG11000;CG11760;CG11883;CG12038;CG12325;CG12605;CG13003;CG1316;CG13575;CG13606;CG13685;CG14186;CG14621;CG14669;CG15021;CG15073;CG15080;CG15270;CG15365;CG15744;CG1648;CG16711;CG16779;CG17816;CG18641;CG1946;CG2225;CG2617;CG2…
swissregulon__sacCer__SIG1	5.34	0.0278	Cnot4 (inferredBy_Orthology).		300	4566	a;Ace;Act87E;Akap200;AOX1;Appl;apt;aralar1;Asph;Asx;Atf-2;Atg4b;bab2;beat-IIIb;beat-IIIc;brat;Bsg25D;C3G;CaBP1;CadN;Camta;CanA1;Ccs;Cda4;CG10359;CG10384;CG10431;CG10492;CG10505;CG10513;CG10600;CG11000;CG11760;CG11883;CG12038;CG12325;CG12605;CG13003;CG1316;CG13575;CG13606;CG13685;CG14186;CG14621;CG14669;CG15021;CG15073;CG15080;CG15270;CG15365;CG15744;CG1648;CG16711;CG16779;CG17816;CG18641;CG1946;C…
cisbp__M0875	5.21	0.0274			251	3424	a;Ace;Act87E;Appl;apt;Asph;Asx;bab2;beat-IIIc;brat;Bsg25D;C3G;CaBP1;CadN;Camta;Ccs;Cda4;CG10359;CG10384;CG10492;CG10505;CG10513;CG10600;CG11000;CG11883;CG12325;CG12605;CG13003;CG1316;CG13377;CG13575;CG13685;CG13920;CG14186;CG14621;CG14669;CG15021;CG15073;CG15080;CG15270;CG15744;CG1648;CG16711;CG16779;CG17816;CG18641;CG1946;CG2225;CG2617;CG30122;CG3078;CG31760;CG31935;CG3198;CG3226;CG32683;CG32809…
transfac_pro__M02897	4.84	0.0261	Optix (inferredBy_Orthology).		269	3967	a;Ace;Akap200;AOX1;Appl;apt;ash1;Asx;Atf-2;Atg4b;bab2;be;beat-IIIb;beat-IIIc;brat;Bsg25D;C3G;CaBP1;CadN;Camta;CanA1;CG10384;CG10600;CG11000;CG11760;CG11883;CG12038;CG12325;CG12605;CG13003;CG1316;CG13575;CG13685;CG13950;CG14186;CG14246;CG14621;CG14964;CG15021;CG15073;CG15080;CG15270;CG15365;CG15744;CG1648;CG16711;CG16779;CG17816;CG18641;CG1946;CG2225;CG2617;CG30122;CG3078;CG31495;CG31760;CG31935;C…
homer__BBHWTATATA_TATA-box	4.83	0.0261			244	3158	a;Ace;Akap200;Appl;apt;Asph;Asx;bab2;beat-IIIc;brat;Bsg25D;C3G;CaBP1;CadN;Camta;CG10300;CG10384;CG10492;CG10505;CG10513;CG10600;CG11000;CG11760;CG11883;CG12325;CG12605;CG13003;CG1316;CG13251;CG13575;CG13606;CG13685;CG14186;CG14621;CG14964;CG15021;CG15073;CG15080;CG15744;CG1648;CG16711;CG16779;CG17816;CG18641;CG1946;CG2225;CG2617;CG30002;CG30122;CG3078;CG31935;CG3198;CG3226;CG32683;CG32809;CG32815…
transfac_pro__M00713	4.77	0.0259	Tbp; Trf; Trf2 (inferredBy_Orthology).		305	4970	a;Ace;Act87E;Act88F;Akap200;alpha-Man-IIb;AOX1;Appl;apt;Ars2;Asph;Asx;bab2;beat-IIIb;beat-IIIc;brat;C3G;CaBP1;CadN;Camta;CanA1;Cda4;CG10300;CG10359;CG10384;CG10492;CG10505;CG10513;CG10600;CG11000;CG11760;CG11883;CG12038;CG12325;CG12605;CG12877;CG13003;CG1316;CG13251;CG13575;CG13606;CG13685;CG13920;CG14186;CG14621;CG14669;CG15021;CG15073;CG15080;CG15247;CG15365;CG15533;CG15744;CG1648;CG16711;CG167…
neph__UW.Motif.0214	4.77	0.0259			36	243	a;Ace;Asx;bab2;beat-IIIc;CG16779;CG31935;CG34347;CG34398;CG42540;CG42784;CG8026;Con;Cpr97Eb;dnc;dysc;esc;exp;fra;heph;Kah;olf413;osp;Ote;phtf;Rdl;rdx;Sec24CD;serp;Syt1;Tango13;Teh2;Teh3;twi;up;wech
cisbp__M1865	4.48	0.0249	fd64A (inferredBy_Orthology).		232	3016	Ace;Appl;apt;aralar1;Asph;Asx;bab2;brat;C3G;CadN;Camta;Ccs;CG10384;CG10492;CG10505;CG11000;CG11760;CG11883;CG12038;CG12325;CG12605;CG13003;CG13575;CG13685;CG14186;CG14621;CG15021;CG15073;CG15080;CG15365;CG15661;CG15744;CG1648;CG16711;CG16779;CG17816;CG18641;CG1946;CG2225;CG2617;CG30122;CG3078;CG3198;CG3226;CG32683;CG32809;CG32815;CG33203;CG34347;CG34370;CG34398;CG3558;CG4022;CG42322;CG42534;CG425…
swissregulon__sacCer__SPT15	4.41	0.0247	Tbp; Trf; Trf2 (inferredBy_Orthology).		248	3454	a;Ace;Act88F;Appl;apt;Asph;Asx;Atg4b;bab2;beat-IIIc;brat;C3G;CadN;Camta;Cda4;CG10384;CG10492;CG10505;CG10600;CG11000;CG11760;CG11883;CG12325;CG12605;CG13003;CG1316;CG13575;CG13606;CG13685;CG14186;CG14621;CG15021;CG15073;CG15080;CG15744;CG1648;CG16711;CG16779;CG17211;CG17816;CG18641;CG1946;CG2225;CG2617;CG30122;CG3078;CG31935;CG3198;CG3226;CG32683;CG32809;CG32815;CG34347;CG34370;CG34398;CG3558;CG4…
cisbp__M0067	4.39	0.0246			191	2439	a;Ace;Act88F;Akap200;Appl;apt;bab2;be;beat-IIIb;beat-IIIc;brat;C3G;CaBP1;CadN;Camta;CG10132;CG10359;CG10384;CG10492;CG10513;CG11760;CG11883;CG12038;CG12325;CG12605;CG1316;CG13606;CG13950;CG14186;CG14408;CG14669;CG15080;CG1646;CG16779;CG17816;CG1946;CG2225;CG31760;CG3198;CG3226;CG32432;CG32683;CG33203;CG33288;CG34347;CG34357;CG34370;CG34398;CG42361;CG42534;CG42540;CG42748;CG42784;CG44838;CG45263;C…
flyfactorsurvey__Cf2-II_FlyReg_FBgn0000286	4.33	0.0244	Cf2 (directAnnotation).		232	3227	a;Ace;Act88F;Appl;apt;Asx;bab2;beat-IIIb;beat-IIIc;brat;C3G;CadN;Camta;CanA1;Cda4;CG10384;CG10492;CG11000;CG11760;CG11883;CG12038;CG12325;CG12605;CG13251;CG13377;CG14186;CG14246;CG14669;CG14964;CG15073;CG15080;CG15744;CG1648;CG16711;CG16779;CG17211;CG17816;CG18641;CG1946;CG2225;CG2258;CG2617;CG30122;CG3078;CG31760;CG32432;CG32683;CG32809;CG32815;CG33203;CG33288;CG34136;CG34347;CG34357;CG34370;CG3…
scertf__morozov.SMP1	4.25	0.0242	Mef2 (inferredBy_Orthology).		223	2847	a;Ace;Appl;apt;Asx;bab2;beat-IIIc;brat;C3G;CadN;Camta;CanA1;CG10359;CG10384;CG10431;CG10492;CG10505;CG10600;CG11000;CG11760;CG11883;CG12038;CG12605;CG13003;CG13575;CG13606;CG13685;CG14186;CG14621;CG14964;CG15021;CG15073;CG15080;CG15247;CG15744;CG1648;CG16711;CG16779;CG17816;CG1946;CG2225;CG2258;CG2617;CG30122;CG3078;CG31935;CG3198;CG3226;CG32683;CG32809;CG32815;CG33203;CG34347;CG34370;CG34398;CG4…
stark__RTATATRTRB	4.03	0.0235	Cf2 (directAnnotation).		287	4329	a;Ace;Act87E;alpha-Man-IIb;Appl;apt;Asph;Asx;Atg4b;bab2;beat-IIIb;beat-IIIc;brat;Bsg25D;C3G;CaBP1;CadN;Camta;CanA1;Ccs;Cda4;CG10384;CG10431;CG10492;CG10505;CG10513;CG10600;CG11000;CG11760;CG11883;CG12038;CG12605;CG13003;CG1316;CG13377;CG13575;CG13685;CG13950;CG14186;CG14621;CG14669;CG15021;CG15073;CG15080;CG15365;CG15744;CG1648;CG16779;CG17816;CG18641;CG1946;CG2225;CG2258;CG2617;CG30122;CG3078;CG…
stark__STATAWAWR	4	0.0234	Tbp (directAnnotation).		278	4299	a;Ace;Act87E;Akap200;Appl;apt;Asx;bab2;beat-IIIc;brat;Bsg25D;C3G;CadN;Camta;CanA1;Cda4;CG10359;CG10384;CG10492;CG10505;CG10513;CG10600;CG10710;CG11000;CG11413;CG11760;CG11883;CG11891;CG12038;CG12605;CG13003;CG1316;CG13575;CG13685;CG14186;CG14246;CG14621;CG14964;CG15021;CG15073;CG15080;CG15365;CG15617;CG15744;CG1648;CG16711;CG16779;CG17816;CG18641;CG1946;CG2225;CG2617;CG30002;CG30122;CG30480;CG307…
flyfactorsurvey__Cf2-PB_SOLEXA_FBgn0000286	3.97	0.0233	Cf2 (directAnnotation).		311	4789	a;Ace;Act87E;Akap200;alpha-Man-IIb;Appl;apt;Asph;Asx;Atf-2;Atg4b;bab2;beat-IIIb;beat-IIIc;brat;Bsg25D;C3G;CaBP1;CadN;Camta;CanA1;Ccs;Cda4;CG10132;CG10384;CG10431;CG10492;CG10505;CG10513;CG10600;CG11000;CG11760;CG11883;CG12038;CG12325;CG12605;CG13003;CG1316;CG13377;CG13575;CG13685;CG14186;CG14246;CG14621;CG14669;CG14964;CG15021;CG15073;CG15080;CG15270;CG15365;CG15744;CG1648;CG16711;CG16779;CG17816…
flyfactorsurvey__CG12155_SANGER_5_FBgn0029957	3.94	0.0232	CG12155 (directAnnotation).		46	392	Act87E;apt;Ars2;Asx;beat-IIIc;CG10492;CG12605;CG13003;CG15080;CG16779;CG32432;CG34347;CG42540;CG42784;CG43078;CG45263;CG5290;chm;Cnx99A;Con;dikar;dnc;FoxK;heph;Kdm4B;msi;mub;nAChRalpha6;Nckx30C;nej;olf413;osp;phu;plum;RapGAP1;Rdl;rdx;scrt;Shab;sli;Socs16D;spg;tn;Tollo;twi;up
transfac_pro__M05660	3.87	0.0229	CG7372 (inferredBy_Orthology).		20	110	a;Camta;CG15021;CG15080;CG16779;CG34370;CG42540;Dg;dpr3;drongo;e;heph;HnRNP-K;nAChRalpha6;nAChRbeta1;phu;pre-mod(mdg4)-AE;pre-mod(mdg4)-Y;rdx;rhea
cisbp__M2682	3.86	0.0229			15	72	CaBP1;CG1648;CG17816;Cnx99A;Fer1;garz;Gp93;heph;Hsc70-3;nAChRalpha6;olf413;scf;tutl;tw;wech
elemento__GGCGCCC	3.79	0.0227			16	65	CadN;CanA1;CG13003;CG33203;CG42784;Con;eIF5B;fng;Kank;mlt;plum;rdx;rump;ssp3;tn;zormin
transfac_pro__M06764	3.75	0.0225	CG5245 (inferredBy_Orthology).		21	124	Camta;CG15080;dnc;dpr3;drd;dysc;EcR;heph;Hsc70-3;kdn;magu;Mbs;nAChRbeta1;nej;olf413;pio;Ptr;Rdl;scrt;twi;unc80
cisbp__M1540	3.75	0.0225	Cnot4 (inferredBy_Orthology).		282	4384	a;Ace;Act87E;Act88F;Akap200;alpha-Man-IIb;Appl;apt;aralar1;Asx;bab2;be;beat-IIIb;beat-IIIc;brat;Bruce;C3G;CadN;Camta;CanA1;Ccs;Cda4;CG10132;CG10300;CG10384;CG10492;CG10505;CG10513;CG10600;CG11000;CG11760;CG12038;CG12325;CG12605;CG13003;CG1316;CG13251;CG13575;CG13606;CG13685;CG14186;CG14246;CG14621;CG14669;CG15021;CG15073;CG15080;CG15247;CG15365;CG15661;CG15744;CG1648;CG16711;CG16779;CG17211;CG178…
taipale__Esrra_DBD_RAGGTCANTCAAGGTCA_repr	3.74	0.0225	ERR (inferredBy_Orthology).	ftz-f1 (inferredBy_MotifSimilarity_n_Orthology).	14	66	brat;CG10431;CG11000;CG13251;chm;Con;Dop1R2;drd;form3;heph;Nckx30C;olf413;Pka-C1;VAChT
cisbp__M5222	3.72	0.0224	sv (directAnnotation).	ey (inferredBy_MotifSimilarity).Poxm (inferredBy_MotifSimilarity_n_Orthology).	26	177	alpha-Man-IIb;Appl;beat-IIIc;CadN;CG15365;CG42534;CG42540;CG42784;CG43078;CG7956;Csk;dnc;dpr12;dysc;Fer1;heph;msps;mtd;mub;osp;RapGAP1;Rdl;rhea;Shab;sli;tutl
flyfactorsurvey__sv_SOLEXA_5_FBgn0005561	3.7	0.0224	sv (directAnnotation).	ey (inferredBy_MotifSimilarity).Poxm (inferredBy_MotifSimilarity_n_Orthology).	23	148	alpha-Man-IIb;Appl;beat-IIIc;CadN;CG15365;CG42534;CG42540;CG42784;CG43078;CG7956;Csk;dnc;dpr12;dysc;heph;mtd;mub;osp;RapGAP1;Rdl;Shab;sli;tutl
transfac_pro__M04774	3.7	0.0224	mor (inferredBy_Orthology).	Six4; pnt (inferredBy_MotifSimilarity_n_Orthology).	218	3147	a;Ace;Act88F;Akap200;alpha-Man-Ib;alpha-Man-IIb;Appl;apt;Asx;Atf-2;bab2;beat-IIIc;brat;C3G;CaBP1;CadN;Camta;Ccs;Cda4;CG10384;CG10431;CG10492;CG10600;CG11413;CG11883;CG12038;CG12325;CG12605;CG12877;CG13606;CG13685;CG14312;CG14621;CG15021;CG15073;CG15080;CG1648;CG16711;CG16779;CG16885;CG17816;CG1946;CG2816;CG2993;CG30122;CG30480;CG31463;CG31678;CG31760;CG31935;CG32432;CG32809;CG33288;CG34347;CG3439…
transfac_public__M00359	3.69	0.0223			18	106	CaBP1;CG1648;CG17816;Cnx99A;dpr12;Fer1;garz;Gp93;heph;Hsc70-3;nAChRalpha6;olf413;Piezo;scf;scrt;tutl;tw;wech
cisbp__M1849	3.69	0.0223	Cf2 (directAnnotation).		299	4497	a;Ace;Act87E;alpha-Man-IIb;Appl;apt;ash1;Asph;Asx;Atg4b;bab2;beat-IIIb;beat-IIIc;brat;Bsg25D;C3G;CaBP1;CadN;Camta;CanA1;Ccs;Cda4;CG10132;CG10384;CG10492;CG10505;CG10513;CG10600;CG11000;CG11760;CG11883;CG12038;CG12605;CG13003;CG1316;CG13377;CG13575;CG13685;CG14186;CG14621;CG14669;CG14964;CG15021;CG15073;CG15080;CG15270;CG15365;CG15744;CG1648;CG16711;CG16779;CG17816;CG18641;CG1946;CG2225;CG2258;CG2…
bergman__Cf2	3.68	0.0223	Cf2 (directAnnotation).		304	4671	a;Ace;Act87E;Act88F;alpha-Man-IIb;Appl;apt;Asph;Asx;Atg4b;bab2;beat-IIIb;beat-IIIc;brat;C3G;CaBP1;CadN;Camta;CanA1;Ccs;Cda4;CG10132;CG10384;CG10431;CG10492;CG10505;CG10513;CG10600;CG11000;CG11760;CG11883;CG11891;CG12038;CG12325;CG12605;CG13003;CG1316;CG13377;CG13575;CG13685;CG14186;CG14621;CG14669;CG15021;CG15073;CG15080;CG15270;CG15365;CG15744;CG1648;CG16711;CG16779;CG17816;CG18641;CG1946;CG2225…
predrem__nrMotif2380	3.67	0.0222			99	1051	Ace;Act88F;alpha-Man-IIb;apt;bdl;beat-IIIc;brat;CG10384;CG10492;CG12038;CG12325;CG12605;CG15021;CG1648;CG16779;CG17211;CG17816;CG18641;CG30002;CG30122;CG30480;CG31495;CG32432;CG33288;CG34347;CG34370;CG42322;CG42361;CG42540;CG42784;CG44838;CG45002;CG45263;CG7956;CG8184;CG8500;CG8740;Cks85A;Cnx99A;Con;ctrip;dpr12;dpr2;dysc;EcR;Esyt2;eys;FER;form3;fra;heph;Kdm4B;kel;LanB2;mAChR-A;msi;mub;Naa60;nAChR…
cisbp__M4797	3.65	0.0222	Cf2 (directAnnotation).		173	1998	a;Ace;Appl;apt;Asx;bab2;brat;Bsg25D;C3G;CadN;CanA1;Cda4;CG10384;CG10492;CG11000;CG11760;CG12038;CG12605;CG13251;CG13685;CG14186;CG14246;CG15080;CG15744;CG1648;CG16711;CG16779;CG17211;CG17816;CG18641;CG1946;CG2225;CG2258;CG2617;CG30122;CG3078;CG31935;CG32683;CG32809;CG32815;CG33203;CG34136;CG34347;CG34370;CG34398;CG3919;CG4022;CG4239;CG42534;CG42540;CG42748;CG42784;CG43078;CG4313;CG44838;CG45002;C…
cisbp__M0263	3.65	0.0222		Atf6; CrebA (inferredBy_MotifSimilarity).Xbp1 (inferredBy_MotifSimilarity_n_Orthology).	95	986	Appl;bab2;beat-IIIb;beat-IIIc;brat;Bsg25D;CaBP1;CadN;Camta;CG10513;CG11883;CG12038;CG13606;CG16779;CG17816;CG32432;CG33203;CG34370;CG42540;CG42784;CG43078;CG44838;CG45263;CG6424;chm;Cht5;Con;Csk;CycT;dlg1;dnc;dpr12;dysc;EcR;enc;Ero1L;exp;fax;FBXO11;fng;form3;FoxK;Gp93;heph;Hr38;Hsc70-3;IRSp53;Kdm4B;kdn;lva;magu;milt;msi;mTerf3;mtg;mub;nAChRalpha6;nAChRalpha7;Nckx30C;nej;nompC;Nrt;olf413;omd;Or59b…
hdpi__RBM3	3.63	0.0221	tra2 (inferredBy_Orthology).		276	4402	a;Ace;Act88F;Akap200;Appl;apt;Asx;bab2;beat-IIIb;beat-IIIc;brat;Bruce;Bsg25D;C3G;CadN;Camta;CanA1;Ccs;Cda4;CG10132;CG10384;CG10431;CG10492;CG10505;CG10600;CG11000;CG11760;CG11883;CG12038;CG12325;CG12605;CG13003;CG13685;CG14186;CG14246;CG14408;CG14621;CG14669;CG15073;CG15080;CG15365;CG15744;CG1648;CG16779;CG17816;CG18641;CG1946;CG2225;CG2258;CG2617;CG30122;CG3078;CG31760;CG31935;CG3198;CG3226;CG32…
cisbp__M0325	3.61	0.0221			146	1927	a;Ace;Appl;Ars2;Asx;bab2;beat-IIIb;beat-IIIc;brat;CaBP1;CadN;Camta;Cda4;CG10492;CG10513;CG11000;CG13685;CG13950;CG15011;CG15270;CG1648;CG16779;CG17816;CG31760;CG31871;CG31935;CG32432;CG32815;CG33056;CG33203;CG34347;CG34370;CG34398;CG42534;CG42540;CG42748;CG42784;CG43078;CG44838;CG45263;CG6191;CG6511;CG7236;CG7546;CG7956;CG9674;Cht5;Cht7;Cnx99A;Con;Csk;ctrip;CycT;dnc;dpr12;Drat;dysc;EcR;enc;Ero1L;…
jaspar__MA0015.1	3.6	0.022	Cf2 (directAnnotation).		292	4307	a;Ace;alpha-Man-IIb;Appl;apt;Asph;Asx;Atg4b;bab2;beat-IIIb;beat-IIIc;brat;Bsg25D;C3G;CaBP1;CadN;Camta;CanA1;Ccs;Cda4;CG10132;CG10384;CG10492;CG10505;CG10600;CG11000;CG11760;CG11883;CG12038;CG12605;CG13003;CG1316;CG13377;CG13575;CG13685;CG14186;CG14621;CG14669;CG14964;CG15021;CG15073;CG15080;CG15270;CG15365;CG15744;CG1648;CG16711;CG16779;CG17816;CG18641;CG1946;CG2225;CG2258;CG2617;CG30122;CG3078;C…
predrem__nrMotif222	3.59	0.022			169	2299	a;Ace;Act88F;Akap200;alpha-Man-IIb;Appl;Asx;bab2;beat-IIIc;brat;CadN;Camta;Ccs;CG10384;CG10492;CG10508;CG11000;CG12038;CG12325;CG13003;CG15080;CG16779;CG17816;CG1946;CG2225;CG2993;CG30122;CG31760;CG31871;CG31935;CG32432;CG32809;CG34347;CG34357;CG34370;CG34398;CG42322;CG42534;CG42540;CG42748;CG42784;CG42817;CG44838;CG45002;CG45263;CG5004;CG6013;CG6191;CG6225;CG6424;CG7896;CG7956;CG8026;CG8176;CG81…
transfac_pro__M02889	3.59	0.022	bowl; drm; odd; sob (inferredBy_Orthology).		15	68	apt;CG16711;CG32432;CG34347;CG42748;dnc;dysc;heph;msi;olf413;osp;Rdl;Shab;sli;zormin
predrem__nrMotif2046	3.58	0.022			17	95	Appl;beat-IIIc;Camta;Con;dnc;Dop1R2;dysc;FoxK;Fs(2)Ket;heph;Hr38;Octbeta1R;olf413;rdo;sqa;sv;vkg
predrem__nrMotif2444	3.58	0.022			23	137	bab2;beat-IIIc;brat;CadN;CG15080;CG34347;CG34370;CG42534;CG42784;CG45002;Con;CycT;dpr2;EcR;heph;IRSp53;Kdm4B;msi;Nckx30C;olf413;shot;Syt1;twi
transfac_pro__M05958	3.54	0.0218	CG7372 (inferredBy_Orthology).		43	351	a;Act88F;beat-IIIb;beat-IIIc;Camta;CG15021;CG15080;CG16779;CG17211;CG32432;CG34370;CG42540;CG44838;CG45263;DAT;Dg;dnc;dpr3;drongo;e;fax;gig;heph;HnRNP-K;hoe1;lab;Mlp60A;msi;mtd;mub;nAChRalpha6;nAChRbeta1;phu;pre-mod(mdg4)-AE;pre-mod(mdg4)-Y;rad;RapGAP1;rdx;rhea;sli;sns;stau;Tollo
cisbp__M2544	3.51	0.0217	Cf2 (directAnnotation).		303	4641	a;Ace;Appl;apt;ash1;Asph;Asx;bab2;beat-IIIb;beat-IIIc;brat;Bsg25D;C3G;CaBP1;CadN;Camta;CanA1;Ccs;Cda4;CG10132;CG10384;CG10431;CG10492;CG10505;CG10513;CG10600;CG11000;CG11760;CG11883;CG11891;CG12038;CG12325;CG12605;CG13003;CG1316;CG13377;CG13575;CG13685;CG13950;CG14186;CG14621;CG14669;CG15021;CG15073;CG15080;CG15365;CG15744;CG1648;CG16711;CG16779;CG17816;CG18641;CG1946;CG2225;CG2258;CG2617;CG30122…
transfac_public__M00013	3.51	0.0217	Cf2 (directAnnotation).		303	4624	a;Ace;Appl;apt;ash1;Asph;Asx;bab2;beat-IIIb;beat-IIIc;brat;Bsg25D;C3G;CaBP1;CadN;Camta;CanA1;Ccs;Cda4;CG10132;CG10384;CG10431;CG10492;CG10505;CG10513;CG10600;CG11000;CG11760;CG11883;CG11891;CG12038;CG12325;CG12605;CG13003;CG1316;CG13377;CG13575;CG13685;CG13950;CG14186;CG14621;CG14669;CG15021;CG15073;CG15080;CG15365;CG15744;CG1648;CG16711;CG16779;CG17816;CG18641;CG1946;CG2225;CG2258;CG2617;CG30122…
cisbp__M0066	3.5	0.0217			237	3246	Ace;Akap200;Appl;apt;Asph;Asx;bab2;beat-IIIc;brat;C3G;CaBP1;CadN;Camta;Cda4;CG10384;CG10492;CG10505;CG10513;CG10600;CG11000;CG11760;CG11883;CG12038;CG12325;CG12605;CG13003;CG1316;CG13575;CG13685;CG14186;CG14621;CG14964;CG15021;CG15073;CG15080;CG15270;CG15744;CG1648;CG16711;CG16779;CG16885;CG17816;CG18641;CG1946;CG2225;CG2617;CG30122;CG3078;CG31935;CG3198;CG3226;CG32683;CG32809;CG32815;CG33203;CG3…
cisbp__M0562	3.49	0.0217			184	2182	a;Ace;Act88F;Appl;apt;Asx;bab2;bdl;be;brat;C3G;CadN;Camta;CanA1;CG10384;CG11000;CG12038;CG12605;CG13003;CG1316;CG13575;CG14186;CG14964;CG15021;CG15073;CG15080;CG1648;CG16711;CG16779;CG16885;CG17211;CG17816;CG18641;CG2617;CG3078;CG31935;CG32432;CG32809;CG34347;CG34370;CG34398;CG42322;CG42540;CG42748;CG42784;CG43078;CG4313;CG44838;CG45263;CG6225;CG6356;CG6511;CG7896;CG8026;CG8176;CG8500;CG8740;CG90…
predrem__nrMotif1250	3.49	0.0217			233	3483	a;Ace;Appl;apt;Asph;Asx;Atf-2;bab2;beat-IIIb;beat-IIIc;brat;C3G;CaBP1;CadN;Camta;Cda4;CG10359;CG10384;CG10600;CG11000;CG12038;CG12325;CG12605;CG13003;CG1316;CG13377;CG13685;CG13950;CG14186;CG14964;CG15021;CG15073;CG15080;CG15270;CG15365;CG15661;CG15744;CG1648;CG16779;CG16885;CG17211;CG17816;CG18641;CG1946;CG2617;CG30002;CG3078;CG31495;CG31760;CG31935;CG3226;CG32432;CG32683;CG32809;CG32815;CG34347…
transfac_pro__M01122	3.48	0.0216		Dp; Spps (inferredBy_MotifSimilarity_n_Orthology).	19	117	brat;CG16779;CG42540;CG43737;Con;DCP2;dikar;eys;fax;fra;heph;Hsc70-3;osp;phu;RapGAP1;sli;SP1173;ssp3;Tollo
cisbp__M1418	3.47	0.0216	CG3328 (inferredBy_Orthology).		145	1897	a;Akap200;alpha-Man-IIb;apt;Ars2;Asx;Atg4b;beat-IIIb;brat;C3G;CadN;Camta;CanA1;CG11760;CG12605;CG13003;CG1316;CG13685;CG13920;CG14246;CG14669;CG15080;CG16779;CG16868;CG17211;CG17816;CG30480;CG3078;CG31365;CG31871;CG31935;CG3198;CG32432;CG34347;CG34357;CG34370;CG34398;CG3734;CG4022;CG42322;CG42534;CG42540;CG42784;CG43078;CG4313;CG45002;CG45105;CG45263;CG6225;CG6424;CG6923;CG7896;CG7956;CG8176;CG85…
hocomoco__TBX1_HUMAN.H10MO.D	3.43	0.0215	org-1 (inferredBy_Orthology).		27	188	brat;CadN;CG12605;CG16779;CG34347;CG42540;CG43737;CG44838;CG7766;CycT;DCP2;dlg1;Dop1R2;Eaat2;eIF5B;fax;heph;mub;Nckx30C;olf413;phu;Pka-C1;rad;RapGAP1;sli;slou;ssp3
scertf__zhu.NHP6B	3.41	0.0214		Tbp (inferredBy_MotifSimilarity_n_Orthology).	293	4807	a;Ace;Act87E;Act88F;Akap200;AOX1;Appl;apt;Asph;Asx;Atf-2;bab2;be;beat-IIIb;beat-IIIc;bou;brat;C3G;CaBP1;CadN;Camta;CanA1;Ccs;Cda4;CG10300;CG10359;CG10384;CG10492;CG10513;CG10600;CG11000;CG11760;CG11835;CG11883;CG12038;CG12605;CG12877;CG13003;CG1316;CG13251;CG13575;CG13606;CG13685;CG13920;CG14621;CG15021;CG15073;CG15080;CG15365;CG15533;CG15661;CG15744;CG1648;CG16711;CG16779;CG17211;CG17816;CG18641…
tiffin__TIFDMEM0000051	3.4	0.0214			9	23	beat-IIIc;Cda4;CG34347;CG45002;heph;msi;rad;rhea;SRPK
swissregulon__sacCer__NHP6B	3.4	0.0214		Tbp (inferredBy_MotifSimilarity_n_Orthology).	246	3780	a;Ace;Act87E;Act88F;Akap200;Appl;apt;Asph;Asx;bab2;beat-IIIb;beat-IIIc;bou;brat;C3G;CaBP1;CadN;Camta;CanA1;Cda4;CG10300;CG10359;CG10384;CG10492;CG10600;CG11000;CG11760;CG11883;CG12038;CG12605;CG12877;CG13003;CG13251;CG13575;CG13606;CG13685;CG14621;CG15021;CG15073;CG15080;CG15533;CG15661;CG15744;CG1648;CG16711;CG16779;CG17211;CG17816;CG18641;CG1946;CG2225;CG2617;CG30002;CG30122;CG3078;CG31495;CG31…
cisbp__M3713	3.4	0.0213	gsb; gsb-n; prd (inferredBy_Orthology).		18	112	beat-IIIb;CadN;CG15365;CG34347;CG34398;CG9674;chp;eIF5B;FER;Fer1;Fife;heph;msi;RapGAP1;rdo;serp;Tango13;verm
transfac_pro__M02888	3.38	0.0213	bowl; drm; odd; sob (inferredBy_Orthology).		20	127	apt;bab2;Bsg25D;CG16711;CG34347;CG42748;CG42784;dgo;dnc;heph;msi;olf413;osp;RapGAP1;Rdl;Shab;sli;ssp3;twi;zormin
neph__UW.Motif.0315	3.36	0.0212			17	96	a;apt;bab2;CG31935;CG34347;CG42540;CG45263;dnc;fax;fng;heph;plum;RapGAP1;rdx;Shab;twi;verm
tiffin__TIFDMEM0000034	3.34	0.0212		CG16779 (inferredBy_MotifSimilarity_n_Orthology).	298	4553	a;Ace;Appl;apt;Asph;Asx;bab2;beat-IIIb;beat-IIIc;brat;Bsg25D;C3G;CaBP1;CadN;Camta;Ccs;Cda4;CG10132;CG10384;CG10431;CG10492;CG10505;CG10513;CG10600;CG11000;CG11414;CG11760;CG11883;CG12038;CG12325;CG12605;CG13003;CG1316;CG13575;CG13685;CG14186;CG14621;CG14669;CG14964;CG15021;CG15073;CG15080;CG15365;CG15744;CG1648;CG16711;CG16779;CG17816;CG18641;CG1946;CG2225;CG2258;CG2617;CG30122;CG3078;CG31760;CG3…
transfac_pro__M01806	3.33	0.0211		Xbp1 (inferredBy_MotifSimilarity_n_Orthology).	21	137	Ace;CaBP1;CG13606;CG13919;CG34398;Cht5;Ero1L;heph;Hsc70-3;IRSp53;magu;mTerf3;nAChRalpha6;olf413;sas;scf;Scgdelta;Sec24CD;sel;tio;vkg
transfac_public__M00360	3.33	0.0211	gsb; gsb-n; prd (inferredBy_Orthology).		19	125	beat-IIIb;CadN;CG15365;CG31871;CG34347;CG34398;CG9674;chp;eIF5B;FER;Fer1;Fife;heph;msi;nAChRalpha6;rdo;serp;Tango13;verm
transfac_pro__M07935	3.32	0.0211	klu (directAnnotation).	sr (inferredBy_MotifSimilarity).Spps (inferredBy_MotifSimilarity_n_Orthology).	53	478	Akap200;apt;bdl;beat-IIIc;brat;Camta;CG13251;CG13606;CG17816;CG33056;CG33288;CG34347;CG42322;CG42540;CG42784;CG45002;CG6191;CG8184;CG8500;CG8740;Con;Csk;dnc;dysc;exp;fax;FER;Fife;fng;form3;heph;mAChR-A;Mbs;milt;msi;nAChRbeta1;NimC4;Nrt;olf413;osp;phtf;pio;Pka-C1;plum;shot;sli;spg;Teh2;Teh3;Tm2;tn;vkg;zormin
hocomoco__OVOL1_HUMAN.H10MO.C	3.32	0.0211	ovo (inferredBy_Orthology).		52	468	Ace;alpha-Man-IIb;apt;beat-IIIc;brat;Camta;CG13003;CG15080;CG16779;CG17816;CG2617;CG30122;CG31871;CG31935;CG32432;CG34347;CG34370;CG42322;CG42784;CG44838;Con;Dop1R2;exp;fax;Fife;gce;heph;Hr38;mAChR-A;msi;mub;nAChRalpha6;nAChRbeta1;Nckx30C;NimC4;olf413;phu;plum;RapGAP1;Rdl;rdo;scrt;serp;Shawl;shot;ssp3;stj;Toll-7;Tollo;tutl;Usp2;zf30C
jaspar__MA0126.1	3.31	0.0211	ovo (directAnnotation).	Poxn (inferredBy_MotifSimilarity).	36	305	a;brat;CG13003;CG15080;CG17816;CG2617;CG31871;CG31935;CG32683;CG34347;CG34370;CG42322;CG42784;CG44838;CG6013;CG8740;Con;dysc;Fife;fng;form3;heph;Hr38;msi;nAChRalpha6;Nckx30C;olf413;plum;RapGAP1;Rdl;rdx;scrt;ssp3;Syt1;twi;zf30C
homer__CCCCGCGC_SUT1_	3.3	0.021			14	57	Appl;bab2;brat;CG42540;Con;dnc;fax;Fs(2)Ket;heph;nej;Ptr;Rdl;sli;ssp3
predrem__nrMotif1495	3.3	0.021		l(3)neo38 (inferredBy_MotifSimilarity).Dp; Spps; cbt; sr (inferredBy_MotifSimilarity_n_Orthology).	21	133	Appl;bab2;beat-IIIc;brat;CG16779;CG18641;CG42540;Con;fax;form3;fra;heph;mAChR-A;Nckx30C;phu;puc;rdo;sli;spg;ssp3;twi
cisbp__M4813	3.29	0.021	CG12155 (directAnnotation).		44	388	Ars2;ash1;Asx;beat-IIIc;brat;CG10492;CG12605;CG13003;CG15080;CG16779;CG34347;CG42540;CG42784;CG43078;CG8740;chm;Cnx99A;Con;dnc;FoxK;heph;Kdm4B;msi;mub;nAChRalpha6;nej;osp;phu;plum;RapGAP1;Rdl;rdx;scrt;Shab;shot;sli;Socs16D;spg;Takl2;tn;Tollo;twi;up;verm
transfac_pro__M07693	3.29	0.021	Xbp1 (directAnnotation).	Atf6 (inferredBy_MotifSimilarity).CrebA (inferredBy_MotifSimilarity_n_Orthology).	212	3080	a;Ace;Appl;apt;bab2;beat-IIIb;beat-IIIc;brat;Bsg25D;CaBP1;CadN;Camta;CanA1;Cda4;CG10384;CG10492;CG10513;CG11000;CG11760;CG11883;CG12038;CG12605;CG13003;CG13097;CG13606;CG13685;CG13919;CG14621;CG14669;CG15011;CG15021;CG15080;CG15270;CG1646;CG1648;CG16779;CG17211;CG17816;CG1946;CG30480;CG3078;CG31495;CG31760;CG31935;CG32432;CG32683;CG32815;CG33056;CG33203;CG34347;CG34357;CG34370;CG34398;CG42534;CG4…
cisbp__M0568	3.29	0.021			17	88	apt;brat;CG16779;CG1946;CG2225;CG31760;CG9674;fax;fra;heph;Kdm4B;Mbs;olf413;Pka-C1;RapGAP1;Rdl;spoon
transfac_pro__M00953	3.26	0.0209			25	158	beat-IIIc;Bruce;CG12605;CG1316;CG14186;CG15021;CG42540;CG45263;CG6225;CG9674;Dop1R2;Fife;fng;IRSp53;nAChRalpha6;nAChRbeta1;Octbeta1R;plum;Rdl;robo1;scrt;sli;Syt1;TfIIEbeta;VAChT
neph__UW.Motif.0312	3.25	0.0209			22	150	apt;CadN;CG10384;CG16779;CG34370;CG42540;CG45002;CG45263;dpr3;exp;Fife;HnRNP-K;msi;nAChRalpha6;Nckx30C;olf413;osp;phu;Rdl;rdx;sns;ssp3
tfdimers__MD00556	3.23	0.0208	HLH3B; HLH4C; Hand; MTF-1; Max; Mitf; Myc; Usf; ac; ase; l(1)sc; nau; sc (inferredBy_Orthology).		29	217	apt;beat-IIIc;brat;CG31760;CG32432;CG34347;CG34398;CG42534;CG42540;Con;dnc;Dop1R2;eys;FER;heph;HnRNP-K;Hr38;lab;LanB2;mub;Nckx30C;nej;nompC;olf413;puc;rhea;Shab;sli;up
predrem__nrMotif1990	3.2	0.0207			15	78	Cda4;CG13003;CG32432;CG34347;CG42784;Fife;Octbeta1R;olf413;Ptr;rad;rdx;rhea;sns;SP1173;twi
transfac_pro__M03569	3.2	0.0207			10	36	beat-IIIc;CG42784;Con;ctrip;EcR;mtd;nAChRalpha6;RapGAP1;sas;sli
predrem__nrMotif2189	3.2	0.0207			240	3328	a;Ace;Akap200;AOX1;Appl;apt;Asph;Asx;bab2;beat-IIIc;brat;C3G;CaBP1;CadN;Camta;CanA1;CG10384;CG10492;CG10505;CG10600;CG11000;CG11883;CG12038;CG12325;CG12605;CG13003;CG13575;CG13685;CG14186;CG14621;CG15021;CG15073;CG15080;CG15365;CG15744;CG1648;CG16711;CG16779;CG17816;CG18641;CG1946;CG2225;CG2617;CG30122;CG3078;CG31935;CG3198;CG3226;CG32432;CG32683;CG32809;CG32815;CG33203;CG34347;CG34370;CG4022;CG4…
hocomoco__SP2_HUMAN.H10MO.C	3.18	0.0206	Spps (inferredBy_Orthology).	CG3065; Sp1 (inferredBy_MotifSimilarity).Dp; Ets96B; cbt; dar1; sr (inferredBy_MotifSimilarity_n_Orthology).	27	195	Appl;ash1;bab2;brat;CG16779;CG34347;CG34370;CG42540;CG42784;CG45263;Con;DCP2;Dg;dnc;fax;fra;heph;Hsc70-3;Map205;nAChRbeta1;nej;olf413;phu;shot;sli;slou;SP1173
elemento__CGGAGCC	3.18	0.0206			56	516	a;Ace;alpha-Man-Ib;Appl;bab2;beat-IIIc;brat;CadN;CG1316;CG15021;CG31495;CG34398;CG42534;CG42784;CG42817;CG4459;Con;ctrip;dikar;dnc;Dop1R2;dpr12;Drep1;dysc;Eaat2;eys;Fife;gig;gwl;heph;mub;nAChRalpha6;nAChRbeta1;NaCP60E;Nckx30C;nej;Nox;olf413;Patronin;pio;Pka-C1;plum;ppk23;Rdl;rno;rump;SP1173;spg;sqa;stj;Strn-Mlck;TfIIEbeta;Toll-7;twi;wech;X11L
cisbp__M3630	3.18	0.0206		klu; sr (inferredBy_MotifSimilarity).	46	383	Akap200;beat-IIIc;CadN;Camta;CG10710;CG13251;CG33056;CG34370;CG34398;CG42322;CG42540;CG42784;CG6191;CG8500;CG9717;Con;Csk;EndoA;exp;FER;Fife;fng;form3;fra;garz;heph;Kank;mAChR-A;Mbs;milt;nAChRalpha6;nAChRbeta1;Nrt;olf413;osp;Piezo;pio;Ptr;RapGAP1;shot;Tm2;tn;twi;up;vkg;zormin
hdpi__SCC-112	3.15	0.0205	pds5 (inferredBy_Orthology).		35	297	Appl;beat-IIIc;brat;CaBP1;CadN;CG10492;CG18641;CG31935;CG33288;CG34370;CG34398;CG42540;CG42784;CG43737;CG44838;CycT;DCP2;dnc;enc;fax;Fife;heph;HnRNP-K;mtd;mtg;mub;nAChRalpha6;olf413;Patronin;Pka-C1;RapGAP1;Rdl;rdo;ssp3;wech
cisbp__M0148	3.14	0.0205			25	177	CadN;CG11413;CG13003;CG3078;CG8740;CG9717;Cht5;Cht7;Con;dysc;emb;FER;form3;gig;Mlc2;mtd;nAChRalpha6;olf413;Pka-C1;PTP-ER;Shab;shot;sli;spoon;twi
taipale__EGR2_DBD_MCGCCCACGCA	3.14	0.0205	sr (inferredBy_Orthology).	klu (inferredBy_MotifSimilarity).	51	461	Akap200;bdl;beat-IIIc;brat;CadN;Camta;CG10492;CG10710;CG13251;CG15021;CG17816;CG31760;CG33288;CG34398;CG42322;CG42540;CG42784;CG6191;CG7945;CG8500;Con;Csk;EndoA;exp;FER;Fife;fng;form3;garz;heph;mAChR-A;Mbs;milt;msi;nAChRbeta1;Nrt;olf413;osp;Pi3K68D;pio;plum;Ptr;RapGAP1;rdx;rhea;Shab;shot;Tm2;tn;vkg;zormin
transfac_pro__M02814	3.13	0.0205	Tbp (inferredBy_Orthology).		238	3712	a;Ace;Act87E;Act88F;Akap200;Appl;apt;Ars2;Asph;Asx;bab2;beat-IIIb;beat-IIIc;brat;C3G;CaBP1;CadN;Camta;CanA1;Cda4;CG10300;CG10359;CG10384;CG10492;CG10600;CG11000;CG11760;CG11835;CG11883;CG12038;CG12325;CG12605;CG12877;CG13003;CG13251;CG13575;CG13606;CG13685;CG13920;CG14621;CG15021;CG15080;CG15533;CG15744;CG1648;CG16779;CG17211;CG17816;CG18641;CG1946;CG2225;CG30122;CG31495;CG31935;CG3198;CG3226;CG3…
cisbp__M1175	3.13	0.0205		scro (inferredBy_MotifSimilarity_n_Orthology).	293	4746	a;Ace;Act88F;Akap200;alpha-Man-Ib;AOX1;Appl;apt;ash1;Asx;bab2;be;beat-IIIb;beat-IIIc;brat;Bsg25D;C3G;CaBP1;CadN;Camta;CanA1;Cda4;CG10384;CG10492;CG10505;CG10508;CG10513;CG11000;CG11760;CG11883;CG11891;CG12038;CG12325;CG12605;CG12877;CG13003;CG1316;CG13575;CG13606;CG13685;CG14186;CG14246;CG14408;CG14515;CG14669;CG15021;CG15073;CG15080;CG15661;CG15744;CG1646;CG1648;CG16711;CG16779;CG16885;CG17211;C…
transfac_public__M00244	3.12	0.0204		klu; sr (inferredBy_MotifSimilarity).	43	344	Akap200;beat-IIIc;CadN;Camta;CG10710;CG13251;CG33056;CG34370;CG34398;CG42322;CG42540;CG42784;CG6191;CG8500;CG9717;Con;Csk;EndoA;exp;FER;Fife;fng;form3;fra;garz;heph;Kank;mAChR-A;Mbs;milt;nAChRalpha6;Nrt;olf413;Piezo;pio;Ptr;RapGAP1;shot;Tm2;tn;up;vkg;zormin
cisbp__M1162	3.12	0.0204			276	4650	a;Ace;Act87E;Act88F;Akap200;alpha-Man-Ib;Appl;apt;Asx;ATPsynD;ATPsynE;bab2;be;beat-IIIb;beat-IIIc;brat;Bruce;Bsg25D;C3G;CadN;Camta;CanA1;Ccs;Cda4;CG10384;CG10492;CG10600;CG11000;CG11760;CG12038;CG12605;CG13003;CG13251;CG13606;CG13685;CG13950;CG14186;CG14246;CG14621;CG15073;CG15080;CG1646;CG16711;CG16779;CG17211;CG17816;CG18540;CG18641;CG1946;CG2225;CG2617;CG30122;CG31495;CG31760;CG31871;CG31935;C…
transfac_pro__M03212	3.12	0.0204			156	2061	a;Ace;Akap200;alpha-Man-IIb;apt;bab2;brat;Bruce;C3G;CaBP1;CadN;CG10492;CG10513;CG10710;CG11000;CG11883;CG12038;CG12605;CG1316;CG13606;CG13685;CG14408;CG15080;CG1648;CG16711;CG16779;CG17816;CG1946;CG2617;CG30122;CG3078;CG32432;CG33203;CG34347;CG34370;CG4049;CG42322;CG42534;CG42540;CG42748;CG42784;CG42817;CG45263;CG5004;CG5281;CG6013;CG6225;CG7341;CG7956;CG7987;CG8176;CG8184;CG8485;CG8500;CG9304;CG…
transfac_pro__M00957	3.11	0.0204			46	435	Ace;Appl;bab2;brat;CG12605;CG14186;CG34347;CG3558;CG42540;CG44838;CG45263;Con;dnc;Dop1R2;dysc;fax;FER;Fife;fng;form3;heph;HnRNP-K;LanB2;Mbs;nAChRalpha6;Octbeta1R;olf413;Pdcd4;pio;Pka-C1;plum;puc;RapGAP1;Rdl;robo1;sas;scrt;sli;sqa;Teh2;Teh3;Tm2;Tollo;twi;VAChT;vkg
transfac_pro__M00304	3.11	0.0204			18	110	a;apt;bab2;CG15021;CG16779;CG2993;dysc;fng;msi;nAChRbeta1;nej;Octbeta1R;pio;plum;Ptr;Rbp1-like;rhea;sqa
elemento__GCCCGCC	3.1	0.0204			18	123	CG34347;CG42322;CG42540;Cnx99A;DCP2;dnc;egl;eIF5B;form3;heph;HnRNP-K;Hrb98DE;l(2)10685;Mbs;mub;rdo;scrt;slou
cisbp__M2047	3.09	0.0203	Poxn (directAnnotation).	ovo (inferredBy_MotifSimilarity).	34	279	a;brat;CG13003;CG15080;CG16779;CG17816;CG2617;CG31871;CG32683;CG34347;CG34370;CG42322;CG42784;CG44838;CG6013;Con;dysc;Fife;fng;heph;Hr38;msi;nAChRalpha6;Nckx30C;olf413;plum;puc;RapGAP1;rdx;scrt;ssp3;Syt1;twi;zf30C
predrem__nrMotif844	3.09	0.0203			21	138	CG10384;CG34347;CG42534;CG45263;CG4563;Con;dpr12;e;FER;fj;heph;KP78a;mub;NaCP60E;Nckx30C;Nrt;olf413;rad;rdx;Shab;sns
elemento__TGGGCGC	3.08	0.0203			36	287	apt;bab2;CanA1;CG13003;CG17816;CG33203;CG34347;CG42784;CG43078;CG6225;CG8500;Cpr49Ag;dnc;Drat;e;eIF5B;exp;form3;Kdm4B;Lap1;mlt;msi;nAChRalpha6;NaCP60E;Octbeta1R;Patronin;Piezo;pio;shot;sli;tn;Ttd14;tutl;twi;VAChT;zormin
taipale_tf_pairs__GCM1_SPDEF_RTGNKGGCGGAWG_CAP_repr	3.08	0.0203	Ets98B; gcm; gcm2 (inferredBy_Orthology).		29	220	beat-IIIc;Camta;CG10384;CG15021;CG16779;CG18641;CG34347;CG42534;CG42540;CG44838;CG6225;Con;DCP2;Dg;EndoA;fax;form3;heph;HnRNP-K;mub;nAChRbeta1;NaCP60E;olf413;rad;Rb97D;rdx;scrt;Shab;sli
swissregulon__hs__FOX_C1_C2_.p2	3.06	0.0202	croc (inferredBy_Orthology).		33	264	brat;Camta;CG11000;CG12605;CG16779;CG16885;CG3078;CG34347;CG42784;CG45002;CG45263;dpr2;EndoA;Fife;FoxK;Fs(2)Ket;heph;msi;mtg;mub;nAChRalpha6;NaCP60E;Nckx30C;olf413;Piezo;Rdl;rdx;Shab;sli;stj;Toll-7;Tollo;wech
cisbp__M1167	3.06	0.0202			259	3898	a;Ace;Act87E;Akap200;AOX1;Appl;apt;aralar1;Asph;Asx;bab2;beat-IIIc;brat;C3G;CaBP1;CadN;Camta;CanA1;Cda4;CG10384;CG10492;CG10505;CG10600;CG11000;CG11835;CG11883;CG12038;CG12325;CG12605;CG13003;CG1316;CG13575;CG13685;CG13920;CG14118;CG14186;CG14312;CG14621;CG14669;CG15021;CG15073;CG15080;CG15365;CG15744;CG1648;CG16711;CG16779;CG16885;CG17816;CG18641;CG1946;CG2225;CG2617;CG2993;CG30122;CG3078;CG3167…
cisbp__M1946	3.05	0.0202	ovo (directAnnotation).	Poxn (inferredBy_MotifSimilarity).	29	220	a;brat;CG13003;CG2617;CG31871;CG32683;CG34347;CG34370;CG42322;CG42784;CG44838;CG6013;Con;dysc;Fife;fng;heph;Hr38;msi;nAChRalpha6;Nckx30C;olf413;plum;RapGAP1;rdx;scrt;ssp3;Syt1;twi
taipale_tf_pairs__GCM1_NHLH1_NCAGCTGNNNNNNNNTRCGGG_CAP_repr	3.04	0.0202	HLH4C; gcm; gcm2 (inferredBy_Orthology).		17	108	a;Act88F;CadN;Cda4;CG34370;CG42540;Con;fax;Fife;heph;milt;msi;pio;plum;rdx;shot;up
transfac_pro__M07934	3.04	0.0201	klu (directAnnotation).	sr (inferredBy_MotifSimilarity).	93	1031	Ace;Akap200;apt;bab2;bdl;beat-IIIb;beat-IIIc;brat;Bsg25D;CadN;Camta;CG12605;CG13251;CG13606;CG15021;CG17816;CG31678;CG33056;CG33288;CG34347;CG34370;CG34398;CG42322;CG42540;CG42784;CG45002;CG6191;CG6225;CG8184;CG8500;CG8740;CG9717;Con;Csk;Dg;dlg1;dnc;Dop1R2;dysc;eIF5B;exp;fax;FER;Fife;fng;form3;fra;heph;Hr38;Kah;Kank;LanB2;mAChR-A;Mbs;milt;msi;mtd;nAChRalpha6;nAChRbeta1;NaCP60E;NimC4;Nrt;Octbeta1R…
cisbp__M1929	3.02	0.0201			20	126	Cda4;CG10384;CG13606;CG34370;CG42534;CG42784;CG7896;chm;Fife;FoxK;heph;hyd;Kdm4B;msi;nAChRalpha6;rdgB;rhea;sli;spoon;tn
hocomoco__FOXG1_HUMAN.H10MO.D	3.01	0.0201	slp1 (inferredBy_Orthology).	CHES-1-like; fd59A (inferredBy_MotifSimilarity).FoxP; croc; fd64A (inferredBy_MotifSimilarity_n_Orthology).	99	1130	Ace;Appl;apt;Asx;bab2;beat-IIIb;beat-IIIc;brat;C3G;Camta;CanA1;CG10384;CG12605;CG13003;CG13920;CG15080;CG15661;CG16711;CG16779;CG2225;CG31760;CG34398;CG4022;CG42540;CG42784;CG43078;CG43737;CG44838;CG45002;CG45263;CG5281;CG6191;CG6424;CG7766;CG7896;CG8176;CG8184;CG8281;Cnx99A;Con;ctrip;Cyp4s3;Dab;Dg;dikar;dlg1;dnc;Dop1R2;dpr12;EcR;eIF5B;emb;enc;fax;FER;Fife;form3;FoxK;gce;heph;HnRNP-K;Hsc70-3;Kdm4…
swissregulon__sacCer__NHP6A	3.01	0.0201			244	3514	a;Ace;Act87E;Act88F;Akap200;AOX1;Appl;apt;Asph;Asx;bab2;beat-IIIc;brat;C3G;CadN;Camta;CanA1;CG10300;CG10359;CG10384;CG10492;CG10513;CG10600;CG11000;CG11760;CG11883;CG12325;CG12605;CG13003;CG13575;CG13606;CG13685;CG14186;CG14621;CG14964;CG15021;CG15073;CG15080;CG15661;CG15744;CG1648;CG16711;CG16779;CG17211;CG17816;CG18641;CG1946;CG2225;CG2617;CG30122;CG3078;CG31495;CG31935;CG3198;CG3226;CG32683;CG…

## Sheet: anta. mf CRE enrichment
motif	NES	AUC	TF_highConf	TF_lowConf	nEnrGenes	rankAtMax	enrichedGenes
transfac_pro__M01164	5.07	0.0309		Mef2 (inferredBy_MotifSimilarity_n_Orthology).	10	354	CG4374;CG5830;chic;Egfr;fru;lbk;Pax;Rcd2;sgg;Timp
cisbp__M1890	4.71	0.0291	Nf-YA (inferredBy_Orthology).	Chrac-14; Nf-YB; Nf-YC; kay (inferredBy_MotifSimilarity_n_Orthology).	6	93	CG4374;Egfr;Hnf4;lbk;RpS4;SpdS
elemento__CCAATCAGC	4.67	0.0289			8	176	26-29-p;CG31321;CG4374;Egfr;fru;lbk;Sugb;Trl
cisbp__M0347	4.63	0.0287		REPTOR-BP (inferredBy_MotifSimilarity).Atf6; CrebB (inferredBy_MotifSimilarity_n_Orthology).	8	140	CG5830;Egfr;fru;lbk;Pax;Rcd2;sgg;Timp
jaspar__MA0060.2	4.59	0.0285	Nf-YA (inferredBy_Orthology).	Chrac-14; Nf-YB; Nf-YC; kay (inferredBy_MotifSimilarity_n_Orthology).	6	106	CG4374;Egfr;Hnf4;lbk;RpS4;SpdS
cisbp__M4669	4.52	0.0282	cnc (directAnnotation).	maf-S (inferredBy_MotifSimilarity).	6	105	chic;Egfr;fru;pyr;Samuel;tal-AA
homer__NAAACCGGTTCAAACCGGTT_Tcfcp2l1	4.44	0.0278	gem (inferredBy_Orthology).		4	36	CG8389;nrv1;Samuel;Snp
transfac_pro__M01589	4.44	0.0278	ERR (inferredBy_Orthology).	ftz-f1 (inferredBy_MotifSimilarity_n_Orthology).	5	57	fru;Gs1l;Pax;Pex19;Samuel
taipale_tf_pairs__ETV2_TBX21_TMACACMGGAARN_CAP	4.34	0.0273			6	78	CG18673;CG4374;Egfr;fru;MAGE;Sodh-1
neph__UW.Motif.0499	4.32	0.0272			5	68	CG4374;fru;Hnf4;Samuel;Trl
transfac_pro__M06678	4.29	0.027			8	203	CG11050;CG11069;CG4374;Egfr;Rcd2;Samuel;Sema5c;tal-AA
predrem__nrMotif434	4.28	0.027			6	118	CG12025;CG4374;CG5830;fru;lbk;Timp
hocomoco__TF2L1_MOUSE.H10MO.C	4.27	0.0269	gem (inferredBy_Orthology).		7	168	CG13784;CG4374;CG8389;fru;nrv1;Samuel;Snp
homer__GTGACCTTGA_Esrrb	4.23	0.0267	ERR (inferredBy_Orthology).	Hr4; ftz-f1 (inferredBy_MotifSimilarity_n_Orthology).	5	64	CG5830;Gs1l;Pax;Pex19;Samuel
predrem__nrMotif1738	4.23	0.0267			5	48	CG11069;CG4374;fru;Moe;Sema5c
cisbp__M4473	4.18	0.0265	exd (inferredBy_Orthology).	Nf-YA; Nf-YB; Nf-YC; kay; yps (inferredBy_MotifSimilarity_n_Orthology).	6	97	CCHa2;CG4374;Egfr;fru;Sema5c;SpdS
predrem__nrMotif737	4.15	0.0263			14	577	CG4374;CG9447;Egfr;fru;lbk;Men;mfas;Moe;Oda;Pect;Rab5;Sam-S;tal-AA;Trl
transfac_pro__M07302	4.09	0.026	Nf-YA; Nf-YB; Nf-YC (inferredBy_Orthology).	CG7839; Chrac-14; exd; kay (inferredBy_MotifSimilarity_n_Orthology).	7	153	26-29-p;CCHa2;CG4374;Egfr;fru;Sema5c;SpdS
cisbp__M0613	4.05	0.0258			8	144	ACC;CG31689;CG4374;CG5830;fru;sgg;Timp;Trl
cisbp__M4532	4.04	0.0258	Myc (inferredBy_Orthology).	Max (inferredBy_MotifSimilarity_n_Orthology).	13	581	Ac76E;Acsl;chic;Dic1;fru;krz;mnd;Nph;pyr;Rab6;sgg;tal-AA;Timp
neph__UW.Motif.0507	4.02	0.0257			5	71	CG4374;CG6357;fru;Pex19;Samuel
scertf__pachkov.STB4	4.02	0.0257			13	560	ACC;CG11236;CG12025;CG1806;CG4374;CG5830;fru;Hnf4;lbk;Pax;Rcd2;Samuel;sgg
taipale__ESRRG_full_TSAAGGTCAN	4	0.0256	ERR (inferredBy_Orthology).	Hr39 (inferredBy_MotifSimilarity).ftz-f1 (inferredBy_MotifSimilarity_n_Orthology).	35	2380	Ac76E;ACC;Acsl;alpha-Est7;Atg18b;CG10361;CG10621;CG11474;CG13784;CG31689;CG4374;CG5567;CG5830;chic;CrzR;Egfr;fabp;Fkbp14;fru;Gs1l;Hph;Inos;l(2)05287;MAGE;Men;Moe;nrv1;Pax;Pex19;Rab5;Rcd2;Samuel;sea;svr;Timp
neph__UW.Motif.0127	3.98	0.0255			7	152	Acsl;CCHa2;CG11050;fru;Pex19;tal-AA;Trl
transfac_pro__M04760	3.95	0.0253		Chd1; pnt (inferredBy_MotifSimilarity_n_Orthology).	5	73	ACC;CG5830;fru;Pect;Trl
transfac_pro__M02928	3.95	0.0253			7	196	Ac76E;Atg18b;CG11050;CG11069;fru;RpL3;Samuel
homer__AGCCAATCGG_NFY	3.93	0.0252		CG7839; Chrac-14; Nf-YA; Nf-YB; Nf-YC; exd (inferredBy_MotifSimilarity_n_Orthology).	7	135	26-29-p;CCHa2;CG4374;Egfr;fru;Sema5c;SpdS
predrem__nrMotif2266	3.93	0.0252			5	82	CG8435;fru;Gs1l;lbk;Pax
predrem__nrMotif1285	3.91	0.0252			11	324	Acsl;CG12945;CG4374;CG5830;eas;Egfr;fru;Gie;lbk;Samuel;tal-AA
elemento__TGGGGGC	3.9	0.0251			11	356	Ac76E;CG4374;Dic1;Egfr;fru;Hnf4;lbk;ppl;pyr;RpS4;tal-AA
transfac_pro__M04846	3.89	0.025		Jra; kay (inferredBy_MotifSimilarity).	9	177	CG4374;CG5830;chic;fru;Gie;mfas;shrb;SPoCk;tal-AA
predrem__nrMotif576	3.88	0.025			6	141	B52;CG12945;CG4374;fru;ref(2)P;Samuel
cisbp__M5413	3.88	0.025	ERR (inferredBy_Orthology).	Hr39 (inferredBy_MotifSimilarity).ftz-f1 (inferredBy_MotifSimilarity_n_Orthology).	35	2363	Ac76E;ACC;Acsl;alpha-Est7;Atg18b;CG10361;CG10621;CG11474;CG13784;CG31689;CG4374;CG5567;CG5830;chic;CrzR;Egfr;fabp;Fkbp14;fru;Gs1l;Hph;Inos;l(2)05287;MAGE;Men;Moe;nrv1;Pax;Pex19;Rab5;Rcd2;Samuel;sea;svr;Timp
homer__TTCAAGGTCA_Nr5a2	3.87	0.025	ftz-f1 (inferredBy_Orthology).	ERR; Hr4; usp (inferredBy_MotifSimilarity_n_Orthology).	54	4005	Ac76E;ACC;Acsl;CCHa2;CG10361;CG10621;CG11050;CG11069;CG11474;CG12025;CG13784;CG14767;CG31689;CG4374;CG5830;CG5916;CG6738;CG8435;CG8520;chic;Dic1;Egfr;fabp;fru;Gs1l;Hnf4;Hph;Inos;l(2)05287;lbk;MAGE;Men;mfas;Moe;nrv1;Pax;PCID2;Pect;Pex19;ppl;pyr;Rab5;Rcd2;RpL10Ab;Samuel;schlank;sea;Sema5c;sgg;Snp;svr;tal-AA;Timp;Trl
yetfasco__YFL031W_94	3.87	0.0249			6	135	CG4374;fru;lbk;mnd;Rcd2;sgg
cisbp__M5759	3.87	0.0249		Hnf4; svp; tll (inferredBy_MotifSimilarity_n_Orthology).	6	131	CG4374;fru;pyr;Samuel;Sema5c;tal-AA
predrem__nrMotif2362	3.85	0.0248			7	196	Ac76E;Acsl;atl;CG4374;Egfr;fru;Trl
transfac_pro__M05931	3.85	0.0248			45	3255	26-29-p;ACC;B52;CCHa2;CG12945;CG13220;CG1806;CG31689;CG32638;CG4374;CG5830;CG5916;CG6178;Dic1;Egfr;fabp;fru;Hnf4;Hph;Inos;Irbp;l(1)G0320;MAGE;Men;mnd;nrv1;Pax;per;Pex19;ppl;Prestin;pyr;Rab5;Rcd2;RpL3;Sam-S;Samuel;sea;Sema5c;sgg;Sodh-1;SPoCk;TBCB;Timp;Trl
hdpi__TRIM69	3.83	0.0247			45	3072	Ac76E;Acsl;atl;bocks;CCHa2;CG12025;CG12945;CG13784;CG31689;CG4374;CG5830;CG6178;CG6357;CG7461;CG8034;CG8550;CG9259;CG9447;Dic1;Egfr;fabp;Fkbp14;fru;Hnf4;l(1)G0320;l(2)05287;lbk;Moe;Pax;PCID2;Pect;pyr;Rho1;Rpn1;Sam-S;Samuel;sea;Sema5c;sgg;Snp;Sod1;SPoCk;svr;tal-AA;Trl
transfac_pro__M02890	3.8	0.0246			4	34	CG4374;CG5830;fru;pyr
predrem__nrMotif1388	3.77	0.0245			4	56	CG4374;fru;Samuel;tal-AA
hocomoco__ERR1_MOUSE.H10MO.A	3.77	0.0244	ERR (inferredBy_Orthology).	ftz-f1 (inferredBy_MotifSimilarity_n_Orthology).	24	1527	Ac76E;ACC;CG10361;CG10621;CG11050;CG13784;CG4374;CG5830;CG8435;Egfr;Fkbp14;fru;Gs1l;Inos;l(2)05287;lbk;MAGE;Men;Moe;Pax;Pex19;Rab5;Samuel;svr
transfac_pro__M00922	3.77	0.0244	bs (inferredBy_Orthology).		7	222	CG4374;Egfr;fru;Rcd2;Samuel;sgg;Timp
transfac_pro__M06091	3.77	0.0244			41	2771	Ac76E;Acsl;Arp2;bel;CG11050;CG11236;CG12025;CG18673;CG31689;CG4374;CG5830;CG6357;CG6928;CG8034;CG9447;CG9510;chic;eas;Egfr;Fkbp14;fru;Gs1l;Hnf4;l(1)G0320;l(2)05287;lbk;lost;Men;Oda;Pax;ppl;pyr;Rcd2;Rho1;RpS4;Samuel;schlank;sgg;Snp;SPoCk;Timp
elemento__CGCCTGCGC	3.75	0.0243		ewg (inferredBy_MotifSimilarity_n_Orthology).	5	100	CG4374;CG6178;Egfr;fru;sgg
cisbp__M4528	3.75	0.0243		Chd1; pnt (inferredBy_MotifSimilarity_n_Orthology).	6	96	ACC;CG4374;CG5830;fru;Pect;Trl
cisbp__M6214	3.71	0.0241	ERR (inferredBy_Orthology).	ftz-f1; srl (inferredBy_MotifSimilarity_n_Orthology).	24	1577	Ac76E;ACC;CG10361;CG10621;CG11050;CG13784;CG4374;CG5830;CG8435;Egfr;Fkbp14;fru;Gs1l;Inos;l(2)05287;lbk;MAGE;Men;Moe;Pax;Pex19;Rab5;Samuel;svr
predrem__nrMotif1389	3.68	0.024			51	3741	Ac76E;ACC;Acsl;Arp2;B52;CG10466;CG10863;CG11069;CG12945;CG31321;CG31689;CG3597;CG4374;CG5567;CG5830;CG5916;CG6178;CG6321;CG7536;CG8034;chic;Egfr;fabp;Fkbp14;fru;Hnf4;l(2)05287;lbk;lost;mfas;Moe;nrv1;Pax;Prestin;pyr;Rab6;Rcd2;Rho1;RpL10Ab;RpL3;Sam-S;Samuel;schlank;sea;Sema5c;sgg;Sod1;Sodh-1;SPoCk;Trl;vsg
elemento__CGCGGCC	3.68	0.024			7	117	CG4374;CG5830;CG9259;fru;Hel25E;Samuel;tal-AA
hocomoco__NR5A2_MOUSE.H10MO.A	3.68	0.024	ftz-f1 (inferredBy_Orthology).	ERR; usp (inferredBy_MotifSimilarity_n_Orthology).	5	75	CG8435;fru;Gs1l;lbk;Pax
homer__CCAAAAAGGG_SEP3	3.66	0.0239			3	13	CG4374;fru;Rcd2
taipale_tf_pairs__E2F3_EOMES_NNGYGNNNNGGCGCSNNNNCRCNN_CAP_repr	3.66	0.0239	E2f1 (inferredBy_Orthology).		4	43	fru;Pect;pyr;sgg
predrem__nrMotif486	3.66	0.0239			4	55	CG11069;Pax;pyr;tal-AA
predrem__nrMotif1214	3.64	0.0238			11	423	CG11069;CG4374;CG5830;Egfr;fru;lbk;lost;Moe;pyr;Samuel;Trl
cisbp__M6185	3.63	0.0238	CG17440; CG3347; Cfp1 (inferredBy_Orthology).		9	384	CG11069;CG30493;CG4374;Egfr;fru;Hph;lbk;Moe;Samuel
taipale_tf_pairs__ETV2_EOMES_TCACACCGGAWRY_CAP	3.62	0.0237			6	142	CG18673;CG4374;Egfr;fru;MAGE;Sodh-1
predrem__nrMotif615	3.61	0.0236			5	101	CG13220;CG4374;Egfr;fru;Sodh-1
neph__UW.Motif.0448	3.6	0.0236			8	258	CG12025;CG12945;Fkbp14;fru;Nph;Samuel;Trl;vsg
predrem__nrMotif337	3.6	0.0236			4	53	fabp;fru;pyr;sea
jaspar__MA0357.1	3.59	0.0236		Myc (inferredBy_MotifSimilarity_n_Orthology).	10	243	Acsl;CG4374;Egfr;fru;krz;mnd;Rab6;Samuel;tal-AA;Timp
elemento__AGCCGGC	3.59	0.0236			8	181	CG13220;CG13784;CG4374;fru;Hnf4;MAGE;Rab5;vsg
predrem__nrMotif1455	3.59	0.0235			4	35	CG4374;fabp;sea;Timp
cisbp__M0298	3.54	0.0233		Atf6; CrebA (inferredBy_MotifSimilarity).Jra (inferredBy_MotifSimilarity_n_Orthology).	4	36	CG31689;CG4374;Hnf4;Samuel
transfac_pro__M07551	3.54	0.0233			4	58	CG11069;CG4374;Hph;Samuel
transfac_pro__M08793	3.53	0.0233	CG10348; ham (inferredBy_Orthology).		4	45	B52;CG31689;fru;Samuel
predrem__nrMotif2197	3.53	0.0233			6	118	Acsl;CG31689;CG4374;fru;Samuel;tal-AA
cisbp__M0343	3.52	0.0232			4	41	CG31689;CG4374;Hnf4;Samuel
jaspar__MA0089.1	3.52	0.0232			4	52	B52;CG4374;Hnf4;Samuel
cisbp__M2162	3.52	0.0232		Myc (inferredBy_MotifSimilarity_n_Orthology).	10	260	Acsl;CG4374;Egfr;fru;krz;mnd;Rab6;Samuel;tal-AA;Timp
cisbp__M2356	3.5	0.0231			3	18	CG4374;fru;Rcd2
transfac_pro__M06858	3.5	0.0231	CG5245 (inferredBy_Orthology).		6	135	CG12025;CG4374;Egfr;fru;Samuel;Trl
stark__RKGTCAAGK	3.49	0.0231			4	57	CG4374;fru;Gs1l;Pax
tiffin__TIFDMEM0000041	3.49	0.0231			5	99	Acsl;Egfr;Pax;Rho1;Samuel
taipale__SRF_DBD_MCCATATAWGGN_repr	3.48	0.023	bs (inferredBy_Orthology).		7	176	CG4374;CG5830;fru;Rcd2;Samuel;Sema5c;Timp
predrem__nrMotif950	3.48	0.023			4	63	fru;Hnf4;pyr;Samuel
jaspar__MA0563.1	3.48	0.023			4	63	CG4374;Egfr;fru;Rcd2
transfac_pro__M01086	3.48	0.023	byn (directAnnotation).		6	141	CG4374;CG9447;Egfr;lbk;Pax;Samuel
cisbp__M1208	3.48	0.023			4	42	CG4374;CG6738;Rcd2;Timp
swissregulon__hs__SRF.p3	3.47	0.0229	bs (inferredBy_Orthology).		11	436	CG12025;CG4374;CG5830;CG9447;Egfr;fru;pyr;Rcd2;Samuel;sgg;Timp
cisbp__M0779	3.45	0.0229			4	40	CG4374;Rcd2;Samuel;sgg
cisbp__M5867	3.44	0.0228	bs (inferredBy_Orthology).		7	193	CG4374;CG5830;fru;Rcd2;Samuel;Sema5c;Timp
homer__NGAGGTCANNGAGTTCANNN_VDR	3.44	0.0228		usp (inferredBy_MotifSimilarity_n_Orthology).	5	93	CG4374;fru;Pax;pyr;Samuel
predrem__nrMotif2326	3.44	0.0228			7	188	CG12025;CG4374;CG5830;CG6178;fru;Samuel;Timp
tfdimers__MD00308	3.43	0.0228	exd (inferredBy_Orthology).		4	56	CG4374;Hnf4;Moe;Rcd2
transfac_public__M00393	3.43	0.0228		bs (inferredBy_MotifSimilarity_n_Orthology).	6	128	CG4374;CG5830;Egfr;fru;lbk;Samuel
cisbp__M0058	3.42	0.0227			3	24	fru;Oda;Samuel
taipale__TBX21_full_GGTGTGAWATCACACC	3.41	0.0226			20	1156	Ac76E;ACC;Acsl;Arp2;CG11655;CG31313;CG4374;CG5567;CG5830;Fkbp14;fru;Gie;Men;mnd;nrv1;Pex19;Sam-S;Samuel;Sema5c;sgg
transfac_pro__M06336	3.41	0.0226			4	48	CG18673;CG31689;fru;Rcd2
homer__BTCAAGGTCA_Nr5a2	3.41	0.0226	ftz-f1 (inferredBy_Orthology).	ERR; Hr4; usp (inferredBy_MotifSimilarity_n_Orthology).	60	4676	Ac76E;ACC;Acsl;alpha-Est7;Atg18b;CCHa2;CG10361;CG10621;CG11050;CG11069;CG11474;CG12025;CG13784;CG14767;CG31689;CG4374;CG5567;CG5830;CG5916;CG6738;CG8435;CG8520;chic;CrzR;Dic1;Egfr;fabp;fru;Gs1l;Hnf4;Hph;Inos;l(2)05287;lbk;MAGE;Men;mfas;Mipp2;Moe;nrv1;Oda;Pax;PCID2;Pect;Pex19;ppl;pyr;Rab5;Rcd2;RpL10Ab;Sam-S;Samuel;schlank;sea;sgg;Snp;SPoCk;svr;Timp;Trl
cisbp__M0840	3.38	0.0225		achi; esg; hth; sna; vis; wor (inferredBy_MotifSimilarity_n_Orthology).	4	39	CG4374;CG6738;Rcd2;Timp
transfac_pro__M06792	3.37	0.0225	CG2120 (inferredBy_Orthology).		10	260	CG11050;CG4374;CG9259;Egfr;Fkbp14;fru;Pax;Rho1;Samuel;wda
taipale_tf_pairs__ELK1_TBX21_TNRCACCGGAAGNN_CAP	3.35	0.0224			4	61	CG18673;CG4374;fru;MAGE
cisbp__M2620	3.34	0.0223		bs (inferredBy_MotifSimilarity_n_Orthology).	6	126	CG4374;CG5830;Egfr;fru;lbk;Samuel
elemento__TGCGTGC	3.33	0.0223			4	59	CG4374;CG5830;CG9447;lbk
elemento__CGCGAGA	3.33	0.0223			46	3061	Ac76E;ACC;Atg18b;CG11069;CG11655;CG12025;CG13784;CG18815;CG31321;CG31689;CG3597;CG4374;CG5830;CG5916;CG9447;chic;Dic1;Egfr;fru;Hnf4;lbk;lost;MAGE;Men;mfas;Mipp2;mnd;Moe;nrv1;Pax;Pect;ppl;pyr;Rab5;Rab6;Rho1;RpL10Ab;Samuel;Sema5c;sgg;SpdS;SPoCk;svr;tal-AA;Timp;Trl
hocomoco__CXXC1_HUMAN.H10MO.D	3.33	0.0223	CG17440; CG3347; Cfp1 (inferredBy_Orthology).		9	387	CG11069;CG30493;CG4374;Egfr;fru;Hph;lbk;Moe;Samuel
predrem__nrMotif388	3.33	0.0222			15	870	CG4374;CG6178;CG9447;fru;Hnf4;Hph;Men;nrv1;Pax;Pect;Sam-S;Samuel;sgg;tal-AA;Trl
transfac_pro__M03200	3.33	0.0222			7	152	Acsl;CG12945;CG4374;fabp;fru;Inos;sea
transfac_pro__M02002	3.31	0.0222			4	71	CG4374;Samuel;Sema5c;Trl
transfac_pro__M06825	3.3	0.0221			4	64	fru;mfas;pyr;Samuel
transfac_pro__M07484	3.29	0.0221			4	50	CG31689;CG4374;fru;Samuel
cisbp__M1207	3.28	0.022			3	29	CG4374;CG6738;Timp
cisbp__M0872	3.28	0.022		achi; esg; sna; vis; wor (inferredBy_MotifSimilarity_n_Orthology).	4	60	CG4374;CG6738;Rcd2;Timp
transfac_pro__M04687	3.28	0.022		Chd1; pnt (inferredBy_MotifSimilarity_n_Orthology).	5	92	ACC;CG4374;CG5830;fru;Trl
neph__UW.Motif.0361	3.28	0.022			8	194	bel;Egfr;fru;pyr;sgg;tal-AA;Timp;Trl
taipale__RARA_DBD_RAGGTCAAAAGGTCAAKN_repr	3.27	0.022		Hnf4; svp; tll (inferredBy_MotifSimilarity_n_Orthology).	64	4789	Ac76E;ACC;Acsl;alpha-Est7;Atg18b;atl;B52;bsk;CCHa2;CG10170;CG10466;CG10863;CG11236;CG12025;CG12945;CG13784;CG14767;CG1785;CG30493;CG32638;CG4374;CG5567;CG8034;CG8389;CG8520;CG8550;CG9447;clos;CrzR;Dic1;eas;Egfr;fabp;frj;fru;Hel25E;Hnf4;Hph;lbk;Men;mfas;mnd;Moe;Oda;Pax;Pex19;ppl;Prosbeta4;pyr;rho-4;RpL10Ab;Sam-S;Samuel;schlank;sea;Sema5c;sgg;shrb;Sod1;SPoCk;svr;tal-AA;Timp;tsr
cisbp__M0015	3.26	0.0219			5	104	CG4374;fru;Hnf4;lbk;Samuel
scertf__harbison.HAP4	3.25	0.0219			4	50	Ac76E;Egfr;Sema5c;SpdS
transfac_public__M00263	3.25	0.0219			3	21	CG4374;fru;Timp
predrem__nrMotif911	3.23	0.0218			3	19	CG8435;Gs1l;lbk
transfac_pro__M06863	3.23	0.0217	Sry-beta; Sry-delta (inferredBy_Orthology).		4	71	CG4374;fru;Pex19;pyr
taipale_tf_pairs__NR1I2_RGTTCRNNNRGTTC_HT	3.23	0.0217			4	71	fru;Pax;pyr;Samuel
transfac_pro__M07957	3.23	0.0217	ERR (directAnnotation).	Hr39; ftz-f1 (inferredBy_MotifSimilarity).	46	3361	Ac76E;ACC;Acsl;alpha-Est7;Atg18b;CG10361;CG10621;CG11474;CG13784;CG14767;CG1640;CG31689;CG4374;CG5567;CG5830;CG6178;CG6357;CG6912;CG8389;CG9447;chic;CrzR;Egfr;fabp;Fkbp14;fru;Gs1l;Hph;Inos;l(2)05287;MAGE;Men;Moe;nrv1;Pax;Pex19;pyr;Rab5;Rcd2;Samuel;schlank;sea;sgg;Sod1;svr;Timp
predrem__nrMotif1027	3.21	0.0217			3	35	fru;Moe;Trl
elemento__TCGTCATC	3.21	0.0217			4	45	B52;CG31689;CG4374;Hnf4
transfac_pro__M05868	3.2	0.0216			4	67	CG4374;fru;Sema5c;tal-AA
swissregulon__hs__NR4A2.p2	3.2	0.0216	Hr38 (inferredBy_Orthology).		6	129	CG5830;Egfr;Gs1l;Men;Pax;Samuel
transfac_pro__M01304	3.18	0.0215	bs (inferredBy_Orthology).		4	63	CG4374;fru;Samuel;Timp
hdpi__ARFGAP1	3.18	0.0215	ArfGAP1 (inferredBy_Orthology).		3	32	Ac76E;CG4374;Sodh-1
elemento__CGCGCTC	3.18	0.0215			48	3333	Ac76E;ACC;Acsl;alpha-Est7;Atg18b;CCHa2;CG11050;CG11069;CG11236;CG12025;CG12945;CG14767;CG31689;CG4374;CG5830;CG5916;CG6178;CG8034;CG8550;CG9447;Dic1;Egfr;fabp;fru;Hnf4;lbk;MAGE;mnd;Moe;nrv1;Pax;Pect;Prosbeta2;pyr;Rab5;Rho1;RpL10Ab;Sam-S;Samuel;sea;Sema5c;sgg;Snp;SPoCk;svr;tal-AA;Timp;Trl
cisbp__M1035	3.17	0.0215	achi; vis (inferredBy_Orthology).	esg; hth; sna; wor (inferredBy_MotifSimilarity_n_Orthology).	4	72	CG4374;CG6738;fru;Timp
cisbp__M0283	3.17	0.0215		Atf-2; Atf3; Atf6; CG44247; CrebA; CrebB; Jra; crc; kay (inferredBy_MotifSimilarity).Xbp1 (inferredBy_MotifSimilarity_n_Orthology).	5	103	CG5830;Egfr;fru;Rcd2;Timp
predrem__nrMotif1803	3.17	0.0215			4	65	CG4374;CG8435;lbk;Pax
swissregulon__hs__T.p2	3.15	0.0214	byn (inferredBy_Orthology).	Doc2; org-1 (inferredBy_MotifSimilarity).Doc1; Doc3 (inferredBy_MotifSimilarity_n_Orthology).	5	130	CG4374;fru;lbk;Samuel;Sema5c
predrem__nrMotif995	3.14	0.0213		CTCF (inferredBy_MotifSimilarity_n_Orthology).	4	65	CG12945;CG4374;Oda;Samuel
cisbp__M6396	3.13	0.0213	ftz-f1 (inferredBy_Orthology).	ERR (inferredBy_MotifSimilarity_n_Orthology).	4	57	CG8435;Gs1l;lbk;Pax
predrem__nrMotif2419	3.12	0.0212			5	121	CG13784;CG4374;CG5830;Gie;Samuel
cisbp__M1850	3.12	0.0212	usp (directAnnotation).		3	21	fru;Rcd2;Samuel
cisbp__M5946	3.12	0.0212		usp (inferredBy_MotifSimilarity_n_Orthology).	5	97	CG4374;fru;Pax;pyr;Samuel
hocomoco__TEAD4_MOUSE.H10MO.D	3.12	0.0212		sd (inferredBy_MotifSimilarity_n_Orthology).	4	61	Egfr;fru;Rho1;Samuel
cisbp__M5019	3.12	0.0212	E(spl)m3-HLH (directAnnotation).	E(spl)m5-HLH; E(spl)mbeta-HLH; E(spl)mdelta-HLH; E(spl)mgamma-HLH (inferredBy_MotifSimilarity).Hey (inferredBy_MotifSimilarity_n_Orthology).	30	1717	Ac76E;ACC;Acsl;B52;CG32638;CG4374;CG5830;chic;CrzR;Dic1;Fkbp14;fru;Hnf4;Hph;krz;Men;Nph;Oda;Pect;per;pyr;Rab5;Rab6;Rcd2;Samuel;schlank;Sema5c;sgg;Snp;tal-AA
transfac_pro__M07953	3.11	0.0212	wor (directAnnotation).	sna (inferredBy_MotifSimilarity).emc (inferredBy_MotifSimilarity_n_Orthology).	12	512	bocks;CCHa2;CG4374;Egfr;fru;Men;Pax;Rcd2;Samuel;schlank;Sema5c;Trl
jaspar__MA1074.1	3.1	0.0211		Usf (inferredBy_MotifSimilarity_n_Orthology).	29	1485	Ac76E;Acsl;CCHa2;CG11050;CG1785;CG4374;chic;clos;Dic1;Egfr;Fkbp14;fru;Hnf4;Hph;krz;l(1)G0320;l(2)05287;mnd;Nph;Oda;Pect;per;pyr;Rab6;RpL3;Samuel;schlank;tal-AA;Timp
jaspar__MA0590.1	3.1	0.0211			3	32	CG4374;Samuel;tal-AA
tfdimers__MD00492	3.1	0.0211	jim; zfh1 (inferredBy_Orthology).		4	75	CG4374;Egfr;fru;MAGE
transfac_pro__M05903	3.09	0.0211			6	144	CG4374;Egfr;fru;lbk;RpS4;Samuel
transfac_pro__M05915	3.09	0.0211			3	30	CG4374;Samuel;Snp
transfac_pro__M01592	3.08	0.021	gem (inferredBy_Orthology).	grh (inferredBy_MotifSimilarity_n_Orthology).	14	556	CG11069;CG12025;CG30493;CG31689;CG4374;CG8389;Egfr;fru;Hnf4;lbk;nrv1;Rab5;Samuel;Snp
predrem__nrMotif2101	3.07	0.021			5	130	CG4374;fru;Samuel;sgg;Timp
hdpi__MSRA	3.07	0.021	Eip71CD (inferredBy_Orthology).		6	168	B52;CG31689;CG4374;Hnf4;Rcd2;Samuel
predrem__nrMotif2552	3.07	0.021			8	272	CG4374;CG7461;fru;lbk;mfas;Pect;tal-AA;Trl
predrem__nrMotif895	3.06	0.0209			8	242	26-29-p;CG4374;Egfr;fru;Hnf4;Rab5;Trl;vsg
predrem__nrMotif2313	3.05	0.0209			4	66	Ac76E;CG4374;fru;Rcd2
stark__ANHDDBHGATAASSDNNB	3.05	0.0209	pnr (directAnnotation).	GATAd; GATAe; grn; srp (inferredBy_MotifSimilarity_n_Orthology).	35	2010	Ac76E;ACC;Acsl;bocks;CCHa2;CG10621;CG12025;CG18673;CG31689;CG3597;CG4374;CG5830;CG6357;Dic1;Egfr;fabp;Fkbp14;fru;Gie;Hnf4;MAGE;Mtp;nrv1;Pax;ppl;pyr;Rab5;Rab6;RpS4;Sam-S;Samuel;sea;Sema5c;svr;Trl
cisbp__M1448	3.05	0.0209	ftz-f1 (inferredBy_Orthology).	ERR (inferredBy_MotifSimilarity).	9	327	CG5830;CG8435;Gs1l;l(2)05287;lbk;MAGE;Pax;Pex19;Samuel
transfac_pro__M01298	3.05	0.0209			6	122	Ac76E;CG4374;fabp;fru;sea;Trl
cisbp__M0159	3.05	0.0209		E(spl)m3-HLH; E(spl)m5-HLH; E(spl)mbeta-HLH; E(spl)mdelta-HLH; E(spl)mgamma-HLH; Hey; Sidpn; dpn; h (inferredBy_MotifSimilarity).	4	60	Fkbp14;fru;Samuel;tal-AA
predrem__nrMotif1691	3.05	0.0209			5	91	bel;CG13784;CG4374;fru;Hnf4
jaspar__MA0016.1	3.04	0.0208	usp (directAnnotation).		3	22	fru;Rcd2;Samuel
jaspar__MA0561.1	3.03	0.0208		Clk (inferredBy_MotifSimilarity_n_Orthology).	29	1538	Ac76E;CCHa2;CG1785;CG32638;CG4374;CG5830;CrzR;Dic1;Egfr;Fkbp14;fru;Hnf4;Hph;krz;l(2)05287;mnd;Nph;Oda;per;pyr;Rab5;Rab6;RpL3;Samuel;schlank;Snp;SpdS;tal-AA;Timp
hdpi__SMAD3	3.02	0.0207	Smox (inferredBy_Orthology).		4	77	B52;CG4374;Egfr;fru
jaspar__MA0960.1	3.02	0.0207		E(spl)m3-HLH; E(spl)m5-HLH; E(spl)mbeta-HLH; E(spl)mdelta-HLH; E(spl)mgamma-HLH; Hey; Sidpn; dpn; h (inferredBy_MotifSimilarity).	4	62	Fkbp14;fru;Samuel;tal-AA
transfac_pro__M01007	3.01	0.0207	bs (inferredBy_Orthology).		3	40	CG4374;fru;Samuel
predrem__nrMotif1248	3.01	0.0207			4	76	CG4374;fru;Rho1;RpL3
jaspar__MA0462.1	3.01	0.0207	Jra (inferredBy_Orthology).		5	104	CG11050;chic;fru;mfas;shrb
cisbp__M1061	3.01	0.0207	achi; vis (inferredBy_Orthology).	esg; hth; sna; wor (inferredBy_MotifSimilarity_n_Orthology).	4	63	CG4374;CG6738;fru;Timp

[truncated: 1 more sheets: anta.fm CRE enrichment]
