# Supplementary material for: Rapid sex-specific adaptation to high temperature in Drosophila
Source: eLife. 2020 Feb 21;9:e53237. doi: 10.7554/eLife.53237 (PMC7034977; doi:10.7554/eLife.53237)
Supplement: Supplementary file 6. — A list of candidate TFs that satisfy the three criteria supporting the hypothesis that selection on sex-biased transcription factors may facilitate rapid sex-specific evolution in gene expression. [file elife-53237-supp6.xlsx]

## Sheet: Sheet1
Supplementary File 6. TFs that regulate sex-biased expression, expression evolution and showed significant evolution in their expression
Gene ID	Gene Name	Chr	start	end	strand	Putatively regulating				significant allele frequency changes	evolutionary pattern	description
						sexual dimorphism	female-specific evolution	male-specific evolution	antagonistic evolution
FBgn0004396	CrebA	3L	15161312	15179472	+	yes	yes	yes	yes	yes	female-specific	Cyclic-AMP response element binding protein A [Source:FlyBase;Acc:FBgn0004396]
FBgn0023076	Clk	3L	7640479	7647462	-	yes	yes	yes	yes	yes	female-specific	Clock [Source:FlyBase;Acc:FBgn0023076]
FBgn0038197	foxo	3R	11158673	11189376	-	yes	yes	yes	yes		female-specific	forkhead box sub-group O [Source:FlyBase;Acc:FBgn0038197]
FBgn0265182	CG44247	2R	18643177	18647791	+	yes	yes	yes	yes		female-specific
FBgn0265193	Atf-2	2R	18636406	18638041	+	yes	yes	yes	yes		male-specific	Activating transcription factor-2 [Source:FlyBase;Acc:FBgn0265193]
FBgn0016694	Pdp1	3L	7682336	7737147	-	yes	yes	yes		yes	female-specific	PAR-domain protein 1 [Source:FlyBase;Acc:FBgn0016694]
FBgn0024371	E2f2	2L	20228788	20230746	-	yes	yes	yes		yes	female-specific	E2F transcription factor 2 [Source:FlyBase;Acc:FBgn0024371]
FBgn0262477	FoxP	3R	15364684	15369774	+	yes	yes		yes	yes	male-specific	Forkhead box P [Source:FlyBase;Acc:FBgn0262477]
FBgn0015602	BEAF-32	2R	8842366	8844525	+	yes	yes			yes	female-specific	Boundary element-associated factor of 32kD [Source:FlyBase;Acc:FBgn0015602]
FBgn0003507	srp	3R	9310583	9320470	-	yes		yes	yes	yes	male-specific	serpent [Source:FlyBase;Acc:FBgn0003507]
FBgn0013469	klu	3L	10747254	10749701	-	yes		yes	yes	yes	male-specific	klumpfuss [Source:FlyBase;Acc:FBgn0013469]
FBgn0004914	Hnf4	2L	8410124	8432781	-	yes		yes	yes		antagonistic	Hepatocyte nuclear factor 4 [Source:FlyBase;Acc:FBgn0004914]
FBgn0000370	crc	2L	20388889	20397368	+	yes		yes	yes		female-specific	cryptocephal [Source:FlyBase;Acc:FBgn0000370]
FBgn0029711	Usf	X	4085620	4089185	-	yes		yes	yes		female-specific
FBgn0011763	Dp	2R	7342852	7348761	+	yes		yes			male-specific	DP transcription factor [Source:FlyBase;Acc:FBgn0011763]
FBgn0011766	E2f1	3R	3762576	3802998	+	yes			yes	yes	female-specific	E2F transcription factor 1 [Source:FlyBase;Acc:FBgn0011766]
FBgn0001994	crp	2L	15621987	15645009	-	yes			yes	yes	male-specific	cropped [Source:FlyBase;Acc:FBgn0001994]
FBgn0003345	sd	X	14768202	14790706	+	yes			yes		female-specific	scalloped [Source:FlyBase;Acc:FBgn0003345]
FBgn0004101	bs	2R	18132251	18157400	+	yes			yes		female-specific	blistered [Source:FlyBase;Acc:FBgn0004101]
