# Supplementary material for: Rapid sex-specific adaptation to high temperature in Drosophila
Source: eLife. 2020 Feb 21;9:e53237. doi: 10.7554/eLife.53237 (PMC7034977; doi:10.7554/eLife.53237)
Supplement: Supplementary file 7. — Mapping statistics of all the samples involved in the tests in this study are reported. [file elife-53237-supp7.xlsx]

## Sheet: mapping_summary
Supplementary File 7. Mapping statistics
	B26b_f	B27b_f	B28b_f	B29b_f	B30b_f	H012_f	H013_f	H022_f	H023_f	H032_f	H033_f	H042_f	H043_f	H052_f	H053_f	H062_f	H063_f	H072_f	H073_f	H082_f	H083_f	H092_f	H093_f	H102_f	H103_f	B26b_m	B27b_m	B28b_m	B29b_m	B30b_m	H011_m	H012_m	H013_m	H021_m	H022_m	H023_m	H031_m	H032_m	H033_m	H041_m	H042_m	H043_m	H051_m	H052_m	H053_m	H061_m	H062_m	H063_m	H071_m
Assigned	11254507	12887886	13862395	16481652	15522071	11507982	14459467	14479089	14333787	11832788	19375527	18265304	14387653	12654632	17166900	12565441	16860644	13573993	18134479	15004068	15141320	15068317	12392555	14099219	10558567	11956009	13801137	12970999	11907114	11046044	13477534	7027763	12537338	9756379	13015836	12798108	12071801	12173165	11103104	13133169	12960507	12356583	9240626	11980396	11679389	14166042	11794380	12625595	13410364
Unassigned_Unmapped	0	0	0	0	0	0	0	0	0	0	0	0	0	0	0	0	0	0	0	0	0	0	0	0	0	0	0	0	0	0	0	0	0	0	0	0	0	0	0	0	0	0	0	0	0	0	0	0	0
Unassigned_MappingQuality	0	0	0	0	0	0	0	0	0	0	0	0	0	0	0	0	0	0	0	0	0	0	0	0	0	0	0	0	0	0	0	0	0	0	0	0	0	0	0	0	0	0	0	0	0	0	0	0	0
Unassigned_Chimera	0	0	0	0	0	0	0	0	0	0	0	0	0	0	0	0	0	0	0	0	0	0	0	0	0	0	0	0	0	0	0	0	0	0	0	0	0	0	0	0	0	0	0	0	0	0	0	0	0
Unassigned_FragmentLength	0	0	0	0	0	0	0	0	0	0	0	0	0	0	0	0	0	0	0	0	0	0	0	0	0	0	0	0	0	0	0	0	0	0	0	0	0	0	0	0	0	0	0	0	0	0	0	0	0
Unassigned_Duplicate	0	0	0	0	0	0	0	0	0	0	0	0	0	0	0	0	0	0	0	0	0	0	0	0	0	0	0	0	0	0	0	0	0	0	0	0	0	0	0	0	0	0	0	0	0	0	0	0	0
Unassigned_MultiMapping	0	0	0	0	0	0	0	0	0	0	0	0	0	0	0	0	0	0	0	0	0	0	0	0	0	0	0	0	0	0	0	0	0	0	0	0	0	0	0	0	0	0	0	0	0	0	0	0	0
Unassigned_Secondary	0	0	0	0	0	0	0	0	0	0	0	0	0	0	0	0	0	0	0	0	0	0	0	0	0	0	0	0	0	0	0	0	0	0	0	0	0	0	0	0	0	0	0	0	0	0	0	0	0
Unassigned_Nonjunction	0	0	0	0	0	0	0	0	0	0	0	0	0	0	0	0	0	0	0	0	0	0	0	0	0	0	0	0	0	0	0	0	0	0	0	0	0	0	0	0	0	0	0	0	0	0	0	0	0
Unassigned_NoFeatures	2452296	2685095	2718676	3504143	2991792	2147606	3185175	3454801	3155900	2266724	3942554	3357141	2628582	2022549	3462192	2117444	3264305	1978637	3017666	2555678	2935880	2318486	2044050	2184653	1912454	3677997	4274196	3645692	3611935	3765670	4155432	5468728	3724533	2663697	3560493	3804911	3533668	3344327	3510612	3831749	3902214	3621840	3019217	3304493	2986135	4075125	3025679	3528088	3430974
Unassigned_Overlapping_Length	0	0	0	0	0	0	0	0	0	0	0	0	0	0	0	0	0	0	0	0	0	0	0	0	0	0	0	0	0	0	0	0	0	0	0	0	0	0	0	0	0	0	0	0	0	0	0	0	0
Unassigned_Ambiguity	58850	67451	75827	86138	79960	59396	73410	75810	72603	64733	101098	99654	74691	70691	89506	64779	81821	72997	93948	84557	75939	80700	63309	74549	55745	109947	132205	130016	115171	102990	132044	71841	124126	95632	127321	127501	116881	120172	113912	132824	128743	125360	90273	116896	117698	133114	120022	120221	145952
total_mapped	13765653	15640432	16656898	20071933	18593823	13714984	17718052	18009700	17562290	14164245	23419179	21722099	17090926	14747872	20718598	14747664	20206770	15625627	21246093	17644303	18153139	17467503	14499914	16358421	12526766	15743953	18207538	16746707	15634220	14914704	17765010	12568332	16385997	12515708	16703650	16730520	15722350	15637664	14727628	17097742	16991464	16103783	12350116	15401785	14783222	18374281	14940081	16273904	16987290
total_read	13979940	15830638	16789258	20276388	18746522	13964304	17974470	18223017	17776280	14287237	23809727	21869593	17252890	14861405	20906928	14864757	20463526	15746896	21433564	17783951	18313268	17598703	14662606	16522660	12675108	15948658	18445832	16966300	15847544	15091577	18026427	12756670	16669223	12686410	16929086	16966300	15934966	15866860	14924800	17336921	17227959	16354821	12548862	15633792	15021847	18648078	15136087	16524798	17222294
Assigned	0.805047	0.81411	0.82567	0.81285	0.827997	0.8241	0.804445	0.794549	0.806343	0.828207	0.813765	0.835192	0.833927	0.85151	0.821111	0.845318	0.823936	0.862011	0.846079	0.843686	0.826795	0.856217	0.845181	0.853326	0.833016	0.749656	0.748198	0.764515	0.751354	0.731934	0.747654	0.550909	0.752125	0.769042	0.768845	0.754325	0.757567	0.767207	0.743937	0.757526	0.752295	0.755532	0.736372	0.766314	0.777494	0.759652	0.779223	0.764039	0.778663
Unassigned_Unmapped	0	0	0	0	0	0	0	0	0	0	0	0	0	0	0	0	0	0	0	0	0	0	0	0	0	0	0	0	0	0	0	0	0	0	0	0	0	0	0	0	0	0	0	0	0	0	0	0	0
Unassigned_MappingQuality	0	0	0	0	0	0	0	0	0	0	0	0	0	0	0	0	0	0	0	0	0	0	0	0	0	0	0	0	0	0	0	0	0	0	0	0	0	0	0	0	0	0	0	0	0	0	0	0	0
Unassigned_Chimera	0	0	0	0	0	0	0	0	0	0	0	0	0	0	0	0	0	0	0	0	0	0	0	0	0	0	0	0	0	0	0	0	0	0	0	0	0	0	0	0	0	0	0	0	0	0	0	0	0
Unassigned_FragmentLength	0	0	0	0	0	0	0	0	0	0	0	0	0	0	0	0	0	0	0	0	0	0	0	0	0	0	0	0	0	0	0	0	0	0	0	0	0	0	0	0	0	0	0	0	0	0	0	0	0
Unassigned_Duplicate	0	0	0	0	0	0	0	0	0	0	0	0	0	0	0	0	0	0	0	0	0	0	0	0	0	0	0	0	0	0	0	0	0	0	0	0	0	0	0	0	0	0	0	0	0	0	0	0	0
Unassigned_MultiMapping	0	0	0	0	0	0	0	0	0	0	0	0	0	0	0	0	0	0	0	0	0	0	0	0	0	0	0	0	0	0	0	0	0	0	0	0	0	0	0	0	0	0	0	0	0	0	0	0	0
Unassigned_Secondary	0	0	0	0	0	0	0	0	0	0	0	0	0	0	0	0	0	0	0	0	0	0	0	0	0	0	0	0	0	0	0	0	0	0	0	0	0	0	0	0	0	0	0	0	0	0	0	0	0
Unassigned_Nonjunction	0	0	0	0	0	0	0	0	0	0	0	0	0	0	0	0	0	0	0	0	0	0	0	0	0	0	0	0	0	0	0	0	0	0	0	0	0	0	0	0	0	0	0	0	0	0	0	0	0
Unassigned_NoFeatures	0.175415	0.169614	0.161929	0.172819	0.159592	0.153793	0.177206	0.189584	0.177534	0.158654	0.165586	0.153507	0.152356	0.136094	0.1656	0.142447	0.159518	0.125653	0.140792	0.143707	0.160314	0.131742	0.139406	0.132222	0.150883	0.230615	0.231716	0.214878	0.227918	0.249521	0.230519	0.428696	0.223438	0.209965	0.210318	0.224263	0.221756	0.210774	0.23522	0.221017	0.226505	0.221454	0.240597	0.211369	0.198786	0.218528	0.199898	0.213503	0.199217
Unassigned_Overlapping_Length	0	0	0	0	0	0	0	0	0	0	0	0	0	0	0	0	0	0	0	0	0	0	0	0	0	0	0	0	0	0	0	0	0	0	0	0	0	0	0	0	0	0	0	0	0	0	0	0	0
Unassigned_Ambiguity	0.0042096	0.00426079	0.0045164	0.00424819	0.00426532	0.00425342	0.00408413	0.00416012	0.00408426	0.00453083	0.00424608	0.00455674	0.00432919	0.00475668	0.00428116	0.00435789	0.00399838	0.00463564	0.00438322	0.00475468	0.00414667	0.00458557	0.00431772	0.00451192	0.00439799	0.00689381	0.0071672	0.00766319	0.00726744	0.00682434	0.00732502	0.00563164	0.00744642	0.00753815	0.00752084	0.00751496	0.00733488	0.00757377	0.0076324	0.00766134	0.00747291	0.00766502	0.00719372	0.00747714	0.00783512	0.00713822	0.00792953	0.00727519	0.0084746
total_mapped	0.984672	0.987985	0.992116	0.989917	0.991855	0.982146	0.985734	0.988294	0.987962	0.991391	0.983597	0.993256	0.990612	0.992361	0.990992	0.992123	0.987453	0.992299	0.991253	0.992148	0.991256	0.992545	0.988904	0.99006	0.988297	0.987165	0.987081	0.987057	0.986539	0.98828	0.985498	0.985236	0.983009	0.986544	0.986684	0.986103	0.986657	0.985555	0.986789	0.986204	0.986273	0.984651	0.984162	0.98516	0.984115	0.985318	0.98705	0.984817	0.986355
total_read	1	1	1	1	1	1	1	1	1	1	1	1	1	1	1	1	1	1	1	1	1	1	1	1	1	1	1	1	1	1	1	1	1	1	1	1	1	1	1	1	1	1	1	1	1	1	1	1	1
[truncated: 11 more columns]
