# Supplementary material for: Rapid sex-specific adaptation to high temperature in Drosophila
Source: eLife. 2020 Feb 21;9:e53237. doi: 10.7554/eLife.53237 (PMC7034977; doi:10.7554/eLife.53237)
Supplement: Supplementary file 8. — The Robustness of the estimation was evaluated with Jackknife sampling. The correlation of the estimates between each pair of Jackknife samples are reported. [file elife-53237-supp8.xlsx]

## Sheet: anc. female
	1	2	3	4	5	6
1	1	0.938	0.932	0.937	0.939	0.939
2	0.938	1	0.934	0.942	0.942	0.941
3	0.932	0.934	1	0.941	0.935	0.941
4	0.937	0.942	0.941	1	0.94	0.971
5	0.939	0.942	0.935	0.94	1	0.944
6	0.939	0.941	0.941	0.971	0.944	1

## Sheet: evo. female
	1	2	3	4	5	6
1	1	0.982	0.983	0.985	0.984	0.986
2	0.982	1	0.985	0.985	0.985	0.984
3	0.983	0.985	1	0.984	0.985	0.986
4	0.985	0.985	0.984	1	0.985	0.986
5	0.984	0.985	0.985	0.985	1	0.989
6	0.986	0.984	0.986	0.986	0.989	1

## Sheet: anc. male
	1	2	3	4	5	6
1	1	0.887	0.887	0.86	0.885	0.881
2	0.887	1	0.881	0.83	0.862	0.847
3	0.887	0.881	1	0.86	0.884	0.863
4	0.86	0.83	0.86	1	0.859	0.951
5	0.885	0.862	0.884	0.859	1	0.86
6	0.881	0.847	0.863	0.951	0.86	1

## Sheet: evo. male
	1	2	3	4	5	6
1	1	0.933	0.926	0.921	0.926	0.898
2	0.933	1	0.945	0.936	0.943	0.927
3	0.926	0.945	1	0.945	0.937	0.922
4	0.921	0.936	0.945	1	0.924	0.933
5	0.926	0.943	0.937	0.924	1	0.917
6	0.898	0.927	0.922	0.933	0.917	1
