# Supplementary material for: Rapid sex-specific adaptation to high temperature in Drosophila
Source: eLife. 2020 Feb 21;9:e53237. doi: 10.7554/eLife.53237 (PMC7034977; doi:10.7554/eLife.53237)
Supplement: Supplementary file 9. — For each Jackknife sampling, the estimated allometric coefficients (α) were applied to predict the whole body expression of the left-out sample based on its expression profiles in gonad and carcass. Pearson’s correlation between the true and predicted values were reported. [file elife-53237-supp9.xlsx]

## Sheet: supp.table3_accurarcy_predictio
	anc. Female	evo. Female	anc. Male	evo. Female
1	0.991808	0.995112	0.996281	0.995258
2	0.995751	0.9946	0.995525	0.99531
3	0.996621	0.995318	0.996236	0.996205
4	0.995169	0.993552	0.994288	0.996004
5	0.996647	0.995934	0.996256	0.994597
6	0.995176	0.995787	0.995223	0.995251
